# Supplementary material for: A cis-carotene derived apocarotenoid regulates etioplast and chloroplast development
Source: eLife. 2020 Jan 31;9:e45310. doi: 10.7554/eLife.45310 (PMC6994220; doi:10.7554/eLife.45310)
Supplement: Supplementary file 3. [file elife-45310-supp3.xlsx]

## Sheet: Description
Supplementary file 3: Transcriptomic analysis of WT, ccr2 and ccr2 ziso-155 etiolated tissues
1	ccr2 vs wt
2	rccr2#155 vs wt
3	ccr2 vs rccr2#155
								agriGO Anaylsis Criteria:
Colour Notation								Select species				Arabidopsis thaliana TAIR10
up-regulated								Select reference				Arabidopsis genome locus (TAIR10)
contra-regulated								Statistical Method				Fisher
down-regulated								Multi-test adjustment method				Hochberg (FDR)
								Significance Level				0.05
DE Column Descriptions								Minimum number of mapping entries				5
genes	Arabidopsis AGI gene accession number							Gene ontology type				Complete GO
Locus.Identifier	Annotated AGI splice variant							P				Biological Process
Gene.Model.Name	Description of gene							F				Biological Function
Gene.Model.Description	Describes if it is protein coding							C				Biological Component
Gene.Model.Type	Gene symbol and name
Primary.Gene.Symbol	Gene symbol and name
logFC	Log2 fold change in gene expression
AveExpr	an average expression level of a gene across all simples sequenced. A gene is basically a low expressed gene if the number is low.
T	moderated t-statistic, which is computed for each probe and for each contrast. This has the same interpretation as an ordinary t-statistic except that the standard errors have been moderated across genes
P.Value	Moderated t-statistics lead to p-values in the same way that ordinary t-statistics do except that the degrees of freedom are increased, reflecting the greater reliability associated with the smoothed standard errors
adj.P.Val	FDR correction
B	P value alternative. The B-statistic (lods or B) is the log-odds that the gene is differentially expressed.
Plastid	Plastid localised genes (P; acronym for positive hits)					See Van Aken, 2012 Frontiers in Plant Science, Vol 3; 281
Plast-Rg	Genes regulated by plastid perturbations					See Van Aken, 2012 Frontiers in Plant Science, Vol 3; 281
M	Mitochondria localised genes (M; acronym for positive hits)					See Van Aken, 2012 Frontiers in Plant Science, Vol 3; 281
Mito-Rg	Genes regulated by mitochondrial perturbations					See Van Aken, 2012 Frontiers in Plant Science, Vol 3; 281
TF	Transcription Factor (TF; acronym for positive hits)					See Van Aken, 2012 Frontiers in Plant Science, Vol 3; 281
Ox	Peroxisome localised genes (Ox; acronym for positive hits)					See Van Aken, 2012 Frontiers in Plant Science, Vol 3; 281
Excel Sheet Acronyms
GV	Genevestigator
GO	Gene Ontology
Org-Retro	Organelle and Retrograde Gene Lists [Van Aken, 2012 Frontiers in Plant Science, Vol 3; 281]
reg	regulated
dereg	deregulated
DE	Differentially Expressed
JL	Juvenile Leaves
ES	Etiolated Seedlings
Genevestigator (GV) Analysis
1. Gene lists were analysed using GV to identify perturbation treatments that reveal greater than 10% of the total up or down regulated gene sets were differentially expressed (up or down) by at least 2 fold.
2. Heat maps were generated using Excel (yellow = up; green = down) to help identify pertubations of significance
3. Perturbations that showed signfiicant affects on genotypes analysed or were related to agriGO anaysis were further evaluated
4. The average percentage of gene expression changes within each genotype of up or down regulated gene sets was determined based upon consistent trends, irrespective of the mutant backgroun or additional treatment conditions
5. Data was summarised in table format (see DE summary)
Comparison to published DE Genes Data Sets (Page et a., 2017)
1. Gene lists were downloaded from Supplemental Files assocaited with Page et al., 2017 (New Phytologist (2017) 213: 1168–1180; doi: 10.1111/nph.14223)
2. DE genes impaired by Norflurazon or Far Red light treatment were compared to ccr2 and rccr2#155
3. The average percentage of gene expression changes within each genotype of up or down regulated gene sets was determined based upon consistent trends, irrespective of the mutant backgroun or additional treatment conditions
4. Data was summarised in table format (see DE summary)

## Sheet: ES-Summary
												Differential gene expression analysis comparison to GeneVestigator (etiolated seedlings)
	Differential gene expression summary (etiolated seedlings)											Genotype	Unchanged Genes	Up-regulated		Down regulated
	Genotype	No.	Up	Down	Total	Unchanged						ccr2 (1)	20806	74		117
	ccr2	1	74	117	191	20806						rccr2#155 (3)	20612	135		250
	rccr2#155	2	135	250	385	20612							Biological Process Perturbed in GV	up	down	up	down
												ccr2 (1)	Norflurazon	0.29661	0.0254237	0.00462963	0.351852
												rccr2#155 (3)	Norflurazon	0.118852	0.0819672	0.0324675	0.142857
	Experiment		Differental Expression		Percentage Organelle Localization and Perturbation							ccr2 (1)	COP9 signalosome (csn)	0.418079	0.0621469	0.111111	0.305556
	Genotype	No.	Change	Number	Plast	Plast-Rg	Mito	Mito-Rg	TF	Perox		rccr2#155 (3)	COP9 signalosome (csn)	0.0765027	0.23224	0.207792	0.180375
	ccr2	1	Up	74	2.7027	9.45946	8.10811	9.45946	6.75676	0
			Down	117	24.7863	15.3846	2.5641	3.4188	4.2735	0		ccr2 (1)	COP1 Mutant	0.338983	0.101695	0.171296	0.365741
			Total	191	16.2304	13.089	4.71204	5.75916	5.2356	0		rccr2#155 (3)	COP1 Mutant	0.360656	0.0860656	0.0411255	0.482684
	rccr2#155	2	Up	135	22.2222	3.7037	2.96296	2.96296	3.7037	0
			Down	250	4.4	6	3.2	7.6	8	0.4		ccr2 (1)	Germination	0.152542	0.279661	0.476852	0.152778
			Total	385	10.6494	5.19481	3.11688	5.97403	6.49351	0.25974		rccr2#155 (3)	Germination	0.481557	0.0368852	0.148268	0.439394
												Differential gene expression analysis comparison to Page et al., 2017 (De-etiolated seedlings)
												ccr2 (1)	Norflurazon	0.19	0.01	0	0.21
												rccr2#155 (3)	Norflurazon	0.1	0.03	0.01	0.16
												ccr2 (1)	Fr Treatment	0.04	0.01	0.01	0.08
												rccr2#155 (3)	Fr Treatment	0.02	0.03	0.01	0.1

## Sheet: 1-ES-ccr2
genes	Locus.Identifier	Gene.Model.Name	Gene.Model.Description	Gene.Model.Type	Primary.Gene.Symbol	logFC	AveExpr	t	P.Value	adj.P.Val	B
AT1G09530	AT1G09530.1	Transcription factor interacting with photoreceptors phyA and phyB. Forms a ternary complex in vitro with G-box element of the promoters of LHY, CCA1. Acts as a negative regulator of phyB signalling. It degrades rapidly after irradiation of dark grown seedlings in a process controlled by phytochromes. Does not play a significant role in controlling light input and function of the circadian clockw…	protein_coding	PHYTOCHROME INTERACTING FACTOR 3 (PIF3)	PHYTOCHROME INTERACTING FACTOR 3 (PIF3);PHOTOCURRENT 1 (POC1);PHYTOCHROME-ASSOCIATED PROTEIN 3 (PAP3);PURPLE ACID PHOSPHATASE 3 (PAP3)	4.9085	2.36696	5.65748	1.55e-06	0.00179647	5.0416
AT5G64060	AT5G64060.1	NAC domain containing protein 103 (NAC103); FUNCTIONS IN: sequence-specific DNA binding transcription factor activity; INVOLVED IN: multicellular organismal development, regulation of transcription; LOCATED IN: cellular_component unknown; EXPRESSED IN: 9 plant structures; EXPRESSED DURING: 6 growth stages; CONTAINS InterPro DOMAIN/s: No apical meristem (NAM) protein (InterPro:IPR003441); BEST Ara…	protein_coding	NAC DOMAIN CONTAINING PROTEIN 103 (NAC103)	NAC DOMAIN CONTAINING PROTEIN 103 (NAC103);NAC DOMAIN CONTAINING PROTEIN 103 (anac103)	4.22647	-0.383824	6.98244	2.28e-08	4.78e-05	8.05282
AT4G22960	AT4G22960.1	Protein of unknown function (DUF544) ; CONTAINS InterPro DOMAIN/s: Protein of unknown function DUF544 (InterPro:IPR007518); BEST Arabidopsis thaliana protein match is: Protein of unknown function (DUF544) (TAIR:AT4G11860.1); Has 737 Blast hits to 425 proteins in 174 species: Archae - 0; Bacteria - 23; Metazoa - 282; Fungi - 261; Plants - 75; Viruses - 0; Other Eukaryotes - 96 (source: NCBI BLink).	protein_coding			4.08979	-1.2644	5.18757	6.93e-06	0.0041601	3.18804
AT1G66870	AT1G66870.1	Carbohydrate-binding X8 domain superfamily protein; FUNCTIONS IN: molecular_function unknown; INVOLVED IN: biological_process unknown; LOCATED IN: endomembrane system; CONTAINS InterPro DOMAIN/s: X8 (InterPro:IPR012946); BEST Arabidopsis thaliana protein match is: Carbohydrate-binding X8 domain superfamily protein (TAIR:AT1G66852.1); Has 1407 Blast hits to 1359 proteins in 48 species: Archae - 0;…	protein_coding			3.64309	-2.14509	4.27646	0.000118948	0.0242101	1.00449
AT4G28950	AT4G28950.1	A member of ROP GTPase gene family.	protein_coding	RHO-RELATED PROTEIN FROM PLANTS 9 (ROP9)	RHO-RELATED PROTEIN FROM PLANTS 9 (ROP9); (RAC7);ARABIDOPSIS RAC-LIKE 7 (ARAC7); (ATROP9); (ATRAC7)	3.29762	-0.211183	4.47432	6.48e-05	0.0175035	1.3546
AT5G55135	AT5G55135.1	unknown protein; Has 30201 Blast hits to 17322 proteins in 780 species: Archae - 12; Bacteria - 1396; Metazoa - 17338; Fungi - 3422; Plants - 5037; Viruses - 0; Other Eukaryotes - 2996 (source: NCBI BLink).	protein_coding			3.2719	-2.63983	4.21154	0.000144931	0.0255723	0.677898
AT3G27630	AT3G27630.1	unknown protein; BEST Arabidopsis thaliana protein match is: unknown protein (TAIR:AT5G40460.1); Has 36 Blast hits to 36 proteins in 6 species: Archae - 0; Bacteria - 0; Metazoa - 0; Fungi - 0; Plants - 36; Viruses - 0; Other Eukaryotes - 0 (source: NCBI BLink).	protein_coding			3.16064	-0.394381	7.70953	2.34e-09	7.01e-06	10.3684
AT4G02390	AT4G02390.1	Encodes a DNA dependent nuclear poly (ADP-ribose) polymerase (E.C.2.4.2.30), thought to be involved in post-translational modification .	protein_coding	POLY(ADP-RIBOSE) POLYMERASE (PP)	POLY(ADP-RIBOSE) POLYMERASE 1 (PARP1); (ATPARP1);POLY(ADP-RIBOSE) POLYMERASE (PP);POLY(ADP-RIBOSE) POLYMERASE (APP)	3.09607	1.89041	8.77216	9.19e-11	3.86e-07	13.6768
AT2G18193	AT2G18193.1	P-loop containing nucleoside triphosphate hydrolases superfamily protein; FUNCTIONS IN: nucleoside-triphosphatase activity, ATPase activity, nucleotide binding, ATP binding; LOCATED IN: endomembrane system; EXPRESSED IN: callus; CONTAINS InterPro DOMAIN/s: ATPase, AAA-type, core (InterPro:IPR003959), ATPase, AAA+ type, core (InterPro:IPR003593), ATPase, AAA-type, conserved site (InterPro:IPR00396…	protein_coding			3.02613	3.06034	11.0225	1.53e-13	1.83e-09	20.4511
AT3G58270	AT3G58270.1	Arabidopsis phospholipase-like protein (PEARLI 4) with TRAF-like domain; CONTAINS InterPro DOMAIN/s: TRAF-like (InterPro:IPR008974), MATH (InterPro:IPR002083), Phospholipase-like, arabidopsis (InterPro:IPR007942); BEST Arabidopsis thaliana protein match is: RESTRICTED TEV MOVEMENT 3 (TAIR:AT3G58350.1); Has 1579 Blast hits to 1429 proteins in 196 species: Archae - 9; Bacteria - 32; Metazoa - 401; …	protein_coding			2.89504	1.71563	7.41169	5.9e-09	1.38e-05	9.70091
AT1G53990	AT1G53990.1	Contains lipase signature motif and GDSL domain.	protein_coding	GDSL-MOTIF LIPASE 3 (GLIP3)	GDSL-MOTIF LIPASE 3 (GLIP3)	2.83011	-1.60815	4.48417	6.29e-05	0.0175035	1.26767
AT1G06820	AT1G06820.1	Encodes carotenoid isomerase. Catalyzes the isomerization of poly-cis-carotenoids to all-trans-carotenoids. Together with PDS and ZDS, CRTiso is required to complete the synthesis of lycopene from phytoene.	protein_coding	CAROTENOID ISOMERASE (CRTISO)	CAROTENOID ISOMERASE (CRTISO);CAROTENOID AND CHLOROPLAST REGULATION 2 (CCR2)	2.5664	6.00568	10.9748	1.74e-13	1.83e-09	20.4337
AT1G14630	AT1G14630.1	unknown protein; BEST Arabidopsis thaliana protein match is: unknown protein (TAIR:AT2G01990.1); Has 125 Blast hits to 123 proteins in 14 species: Archae - 0; Bacteria - 0; Metazoa - 0; Fungi - 0; Plants - 125; Viruses - 0; Other Eukaryotes - 0 (source: NCBI BLink).	protein_coding			2.5025	0.263007	3.76256	0.000553507	0.0498797	-0.402553
AT1G29860	AT1G29860.1	member of WRKY Transcription Factor; Group II-c	protein_coding	WRKY DNA-BINDING PROTEIN 71 (WRKY71)	WRKY DNA-BINDING PROTEIN 71 (ATWRKY71);WRKY DNA-BINDING PROTEIN 71 (WRKY71)	2.48221	-1.7062	4.52848	5.48e-05	0.0164466	1.34417
AT3G61170	AT3G61170.1	Tetratricopeptide repeat (TPR)-like superfamily protein; INVOLVED IN: biological_process unknown; LOCATED IN: mitochondrion; EXPRESSED IN: 21 plant structures; EXPRESSED DURING: 14 growth stages; CONTAINS InterPro DOMAIN/s: Pentatricopeptide repeat (InterPro:IPR002885); BEST Arabidopsis thaliana protein match is: Tetratricopeptide repeat (TPR)-like superfamily protein (TAIR:AT2G27610.1); Has 4811…	protein_coding			2.39781	0.355204	3.94414	0.000323856	0.0390805	0.0927747
AT3G13760	AT3G13760.1	Cysteine/Histidine-rich C1 domain family protein; FUNCTIONS IN: zinc ion binding; LOCATED IN: membrane; EXPRESSED IN: root, leaf; CONTAINS InterPro DOMAIN/s: DC1 (InterPro:IPR004146), Zinc finger, PHD-type (InterPro:IPR001965), C1-like (InterPro:IPR011424); BEST Arabidopsis thaliana protein match is: Cysteine/Histidine-rich C1 domain family protein (TAIR:AT1G35610.1); Has 1382 Blast hits to 598 p…	protein_coding			2.37089	-0.733754	3.96677	0.000302753	0.0378388	0.197611
AT4G10180	AT4G10180.1	Encodes a nuclear-localized protein that acts as a repressor of photomorphogenesis and may be involved in chromatin remodeling.	protein_coding	DE-ETIOLATED 1 (DET1)	(ATDET1);DE-ETIOLATED 1 (DET1);FUSCA 2 (FUS2)	2.35337	0.421155	5.11411	8.75e-06	0.00460298	3.46226
AT5G48720	AT5G48720.2	Encodes XRI1 (X-ray induced 1). Required for post-meiotic stages of pollen development and male and female meiosis. Maybe required for meiotic DNA repair. Inducible by X-ray. Homozygous xri1 mutants are sterile due to extensive chromosome fragmentation.	protein_coding	X-RAY INDUCED TRANSCRIPT 1 (XRI1)	X-RAY INDUCED TRANSCRIPT 1 (XRI1);X-RAY INDUCED TRANSCRIPT (XRI)	2.34236	2.8299	9.88915	3.54e-12	2.48e-08	17.055
AT3G53220	AT3G53220.1	Thioredoxin superfamily protein; INVOLVED IN: cell redox homeostasis; LOCATED IN: cellular_component unknown; EXPRESSED IN: 17 plant structures; EXPRESSED DURING: 11 growth stages; CONTAINS InterPro DOMAIN/s: Thioredoxin fold (InterPro:IPR012335), Thioredoxin, core (InterPro:IPR015467), Thioredoxin-like (InterPro:IPR017936), Thioredoxin domain (InterPro:IPR013766), Thioredoxin-like fold (InterPro…	protein_coding			2.31549	0.0748278	3.81442	0.000475383	0.0468621	-0.283223
AT2G46750	AT2G46750.1	Encodes a homolog of rat L-gulono-1,4-lactone (L-GulL) oxidase that is involved in the biosynthesis of L-ascorbic acid.	protein_coding	L -GULONO-1,4-LACTONE ( L -GULL) OXIDASE 2 (GULLO2)	L -GULONO-1,4-LACTONE ( L -GULL) OXIDASE 2 (GULLO2); (ATGULLO2)	2.29514	0.335548	5.40075	3.52e-06	0.0027391	4.36078
AT1G70440	AT1G70440.1	Encodes a protein with similarity to RCD1 but without the WWE domain. The protein does have a PARP signature upstream of the C-terminal protein interaction domain. The PARP signature may bind NAD+ and attach the ADP-ribose-moiety from NAD+ to the target molecule. Its presence suggests a role for the protein in ADP ribosylation.	protein_coding	SIMILAR TO RCD ONE 3 (SRO3)	SIMILAR TO RCD ONE 3 (SRO3)	2.27512	-1.12272	4.65006	3.76e-05	0.0136099	2.08035
AT1G77240	AT1G77240.1	AMP-dependent synthetase and ligase family protein; FUNCTIONS IN: catalytic activity; INVOLVED IN: metabolic process; CONTAINS InterPro DOMAIN/s: AMP-binding, conserved site (InterPro:IPR020845), AMP-dependent synthetase/ligase (InterPro:IPR000873); BEST Arabidopsis thaliana protein match is: AMP-dependent synthetase and ligase family protein (TAIR:AT1G21540.1); Has 78814 Blast hits to 72062 prot…	protein_coding			2.27253	-2.35853	4.1438	0.000177944	0.0289635	0.379763
AT3G05905	AT3G05905.1	Potential natural antisense gene, locus overlaps with AT3G05900	other_rna			2.20021	0.388009	3.87926	0.000392616	0.0427137	0.000771725
AT2G23040	AT2G23040.1	unknown protein; Has 8 Blast hits to 8 proteins in 3 species: Archae - 0; Bacteria - 0; Metazoa - 0; Fungi - 0; Plants - 8; Viruses - 0; Other Eukaryotes - 0 (source: NCBI BLink).	protein_coding			2.19856	0.466146	4.78014	2.5e-05	0.0105185	2.04198
AT2G28780	AT2G28780.1	unknown protein; INVOLVED IN: biological_process unknown; LOCATED IN: mitochondrion; EXPRESSED IN: inflorescence meristem, root, flower; EXPRESSED DURING: petal differentiation and expansion stage; CONTAINS InterPro DOMAIN/s: Protein of unknown function DUF939, bacterial (InterPro:IPR010343); BEST Arabidopsis thaliana protein match is: unknown protein (TAIR:AT3G09450.1); Has 671 Blast hits to 667…	protein_coding			2.19283	0.835868	6.56828	8.47e-08	0.000161689	7.81782
AT3G52115	AT3G52115.1	Induced in response to ionizing radiation, shows basal expression in mitotically active cells and high expression in endoreduplicating cells. May be involved in DNA damage-induced growth arrest. Protein sequence contains a PEST destruction box.	protein_coding	GAMMA RESPONSE GENE 1 (GR1)	GAMMA RESPONSE GENE 1 (GR1); (COM1); (AtCOM1);GAMMA RESPONSE GENE 1 (ATGR1)	2.14319	0.611864	4.32392	0.000102897	0.0222735	1.1077
AT3G19390	AT3G19390.1	Granulin repeat cysteine protease family protein; FUNCTIONS IN: cysteine-type endopeptidase activity, cysteine-type peptidase activity; INVOLVED IN: proteolysis; LOCATED IN: endomembrane system; EXPRESSED IN: 9 plant structures; EXPRESSED DURING: 4 anthesis, petal differentiation and expansion stage; CONTAINS InterPro DOMAIN/s: Peptidase C1A, papain (InterPro:IPR013128), Proteinase inhibitor I29,…	protein_coding			2.13123	3.89502	4.51357	5.74e-05	0.0169804	1.6204
AT1G64320	AT1G64320.1	myosin heavy chain-related; FUNCTIONS IN: molecular_function unknown; INVOLVED IN: response to cadmium ion; LOCATED IN: cellular_component unknown; EXPRESSED IN: male gametophyte, flower, cultured cell, pollen tube; EXPRESSED DURING: L mature pollen stage, M germinated pollen stage, 4 anthesis; BEST Arabidopsis thaliana protein match is: myosin heavy chain-related (TAIR:AT5G41780.1); Has 120676 B…	protein_coding			2.09461	-0.253054	4.2738	0.000119915	0.0242101	0.69783
AT3G16650	AT3G16650.1	Transducin/WD40 repeat-like superfamily protein; CONTAINS InterPro DOMAIN/s: WD40 repeat 2 (InterPro:IPR019782), WD40 repeat, conserved site (InterPro:IPR019775), WD40 repeat (InterPro:IPR001680), G-protein beta WD-40 repeat, region (InterPro:IPR020472), WD40 repeat-like-containing domain (InterPro:IPR011046), WD40-repeat-containing domain (InterPro:IPR017986), WD40/YVTN repeat-like-containing do…	protein_coding			2.06836	0.966151	4.31633	0.000105311	0.0223356	1.08176
AT3G28210	AT3G28210.1	Encodes a putative zinc finger protein (PMZ).	protein_coding	(PMZ)	STRESS-ASSOCIATED PROTEIN 12 (SAP12); (PMZ)	2.05404	1.03592	3.86534	0.000409109	0.0431661	0.0311819
AT2G21640	AT2G21640.1	Encodes a protein of unknown function that is a marker for oxidative stress response.	protein_coding			2.03561	2.22826	4.01196	0.000264528	0.0357431	0.357745
AT1G30475	AT1G30475.1	BEST Arabidopsis thaliana protein match is: embryo defective 1303 (TAIR:AT1G56200.1); Has 148 Blast hits to 148 proteins in 34 species: Archae - 0; Bacteria - 14; Metazoa - 63; Fungi - 0; Plants - 62; Viruses - 0; Other Eukaryotes - 9 (source: NCBI BLink).	protein_coding			2.01183	1.84808	5.32048	4.55e-06	0.00340979	3.92971
AT5G13210	AT5G13210.1	Uncharacterised conserved protein UCP015417, vWA; CONTAINS InterPro DOMAIN/s: Uncharacterised conserved protein UCP015417, vWA (InterPro:IPR011205), von Willebrand factor, type A (InterPro:IPR002035); BEST Arabidopsis thaliana protein match is: Uncharacterised conserved protein UCP015417, vWA (TAIR:AT3G24780.1); Has 1807 Blast hits to 1807 proteins in 277 species: Archae - 0; Bacteria - 0; Metazo…	protein_coding			1.93821	2.4687	5.28161	5.14e-06	0.00372515	4.01738
AT5G03780	AT5G03780.1	Encodes a protein whose sequence is similar to human telomere proteins. This belongs to TRFL family 2, which do not show DNA binding in vitro.	protein_coding	TRF-LIKE 10 (TRFL10)	TRF-LIKE 10 (TRFL10)	1.93665	1.6253	5.10852	8.91e-06	0.00492193	3.42556
AT4G39675	AT4G39675.1	unknown protein; Has 30201 Blast hits to 17322 proteins in 780 species: Archae - 12; Bacteria - 1396; Metazoa - 17338; Fungi - 3422; Plants - 5037; Viruses - 0; Other Eukaryotes - 2996 (source: NCBI BLink).	protein_coding			1.93628	1.84977	3.92531	0.00034251	0.0396357	0.0893919
AT4G39740	AT4G39740.1	Encodes HCC2, one of the two Arabidopsis genes (HCC1 and HCC2) resulting from a duplication with homology to the SCO proteins involved in copper insertion during cytochrome c oxidase (COX) assembly in other organisms. HCC2, which lacks the cysteines and histidine putatively involved in copper binding, functions in copper sensing and redox homeostasis.	protein_coding	HOMOLOGUE OF COPPER CHAPERONE SCO1 2 (HCC2)	HOMOLOGUE OF COPPER CHAPERONE SCO1 2 (HCC2)	1.92158	1.73612	4.38922	8.42e-05	0.019872	1.35273
AT4G21070	AT4G21070.1	Encodes AtBRCA1, an ortholog of the human breast cancer susceptibility gene 1. Contains one N-terminal RING finger, two C-terminal BRCT and the p300/CBP interacting domain. Strongly induced by gamma rays, consistent with a putative role in DNA repair and in cell cycle control.	protein_coding	BREAST CANCER SUSCEPTIBILITY1 (BRCA1)	BREAST CANCER SUSCEPTIBILITY1 (BRCA1);ARABIDOPSIS THALIANA BREAST CANCER SUSCEPTIBILITY1 (ATBRCA1)	1.8392	2.10779	4.42094	7.64e-05	0.0188745	1.53497
AT1G23550	AT1G23550.1	Encodes a protein with similarity to RCD1 but without the WWE domain. The protein does have a PARP signature upstream of the C-terminal protein interaction domain. The PARP signature may bind NAD+ and attach the ADP-ribose-moiety from NAD+ to the target molecule. Its presence suggests a role for the protein in ADP ribosylation.	protein_coding	SIMILAR TO RCD ONE 2 (SRO2)	SIMILAR TO RCD ONE 2 (SRO2)	1.79181	1.09359	4.98674	1.31e-05	0.00624494	3.05242
AT4G32870	AT4G32870.1	Polyketide cyclase/dehydrase and lipid transport superfamily protein; CONTAINS InterPro DOMAIN/s: Polyketide cyclase/dehydrase (InterPro:IPR019587); BEST Arabidopsis thaliana protein match is: Polyketide cyclase/dehydrase and lipid transport superfamily protein (TAIR:AT2G25770.2); Has 254 Blast hits to 254 proteins in 94 species: Archae - 0; Bacteria - 125; Metazoa - 0; Fungi - 0; Plants - 118; V…	protein_coding			1.76287	2.58749	4.01866	0.000259279	0.0355068	0.363202
AT3G27060	AT3G27060.1	Encodes one of the 3 ribonucleotide reductase (RNR) small subunit genes. TSO2 transcription occurs predominantly at the S-phase of the cell cycle and its expression pattern is consistent with its role in dNDP biosynthesis during DNA replication in actively dividing cells. Critical for cell cycle progression, DNA damage repair and plant development.	protein_coding	TSO MEANING 'UGLY' IN CHINESE 2 (TSO2)	TSO MEANING 'UGLY' IN CHINESE 2 (TSO2); (ATTSO2)	1.71898	4.73687	8.01419	9.12e-10	3.19e-06	12.2737
AT3G14770	AT3G14770.1	Nodulin MtN3 family protein; FUNCTIONS IN: molecular_function unknown; INVOLVED IN: biological_process unknown; LOCATED IN: endomembrane system, integral to membrane, membrane; EXPRESSED IN: 22 plant structures; EXPRESSED DURING: 13 growth stages; CONTAINS InterPro DOMAIN/s: MtN3/saliva-related transmembrane protein, conserved region (InterPro:IPR018169), RAG1-activating protein 1 homologue (Inte…	protein_coding	(SWEET2)	(SWEET2); (AtSWEET2)	1.70943	4.22777	4.03444	0.000247308	0.0353247	0.211385
AT1G78460	AT1G78460.1	SOUL heme-binding family protein; FUNCTIONS IN: binding; INVOLVED IN: biological_process unknown; LOCATED IN: endomembrane system; EXPRESSED IN: 21 plant structures; EXPRESSED DURING: 13 growth stages; CONTAINS InterPro DOMAIN/s: SOUL haem-binding protein (InterPro:IPR006917); BEST Arabidopsis thaliana protein match is: SOUL heme-binding family protein (TAIR:AT1G17100.1); Has 1017 Blast hits to 9…	protein_coding			1.70657	4.38454	4.4755	6.46e-05	0.0175035	1.64875
AT3G21530	AT3G21530.1	DNAse I-like superfamily protein; FUNCTIONS IN: hydrolase activity; INVOLVED IN: biological_process unknown; LOCATED IN: mitochondrion; CONTAINS InterPro DOMAIN/s: Endonuclease/exonuclease/phosphatase (InterPro:IPR005135); BEST Arabidopsis thaliana protein match is: DNAse I-like superfamily protein (TAIR:AT2G48030.1); Has 250 Blast hits to 250 proteins in 102 species: Archae - 0; Bacteria - 169; …	protein_coding			1.70497	0.916921	4.12436	0.000188701	0.0294578	0.675766
AT1G13330	AT1G13330.1	Encodes the Arabidopsis Hop2 homologue. In other species, Hop2 is proposed to be involved in inter-homolog bias in double strand break repair.	protein_coding	ARABIDOPSIS HOP2 HOMOLOG (AHP2)	ARABIDOPSIS HOP2 HOMOLOG (AHP2)	1.6419	0.648283	3.9499	0.000318357	0.0386611	0.193968
AT3G53200	AT3G53200.1	Member of the R2R3 factor gene family.	protein_coding	MYB DOMAIN PROTEIN 27 (MYB27)	MYB DOMAIN PROTEIN 27 (AtMYB27);MYB DOMAIN PROTEIN 27 (MYB27)	1.60282	-0.967988	5.43493	3.16e-06	0.00266665	4.39621
AT3G07800	AT3G07800.1	Thymidine kinase; FUNCTIONS IN: thymidine kinase activity, ATP binding; INVOLVED IN: pyrimidine deoxyribonucleoside interconversion, anaerobic respiration; LOCATED IN: cellular_component unknown; EXPRESSED IN: 23 plant structures; EXPRESSED DURING: 13 growth stages; CONTAINS InterPro DOMAIN/s: Thymidine kinase (InterPro:IPR001267), Thymidine kinase, conserved site (InterPro:IPR020633); BEST Arabi…	protein_coding			1.57159	3.86046	7.53639	4e-09	1.05e-05	10.8341
AT2G29740	AT2G29740.1	UDP-glucosyl transferase 71C2 (UGT71C2); FUNCTIONS IN: quercetin 3-O-glucosyltransferase activity, quercetin 3'-O-glucosyltransferase activity, UDP-glycosyltransferase activity, quercetin 7-O-glucosyltransferase activity, transferase activity, transferring glycosyl groups; INVOLVED IN: metabolic process; LOCATED IN: cellular_component unknown; EXPRESSED IN: hypocotyl, root; CONTAINS InterPro DOMA…	protein_coding	UDP-GLUCOSYL TRANSFERASE 71C2 (UGT71C2)	UDP-GLUCOSYL TRANSFERASE 71C2 (UGT71C2)	1.52672	1.33682	5.42102	3.3e-06	0.00266665	4.43853
AT1G29030	AT1G29030.1	Apoptosis inhibitory protein 5 (API5); FUNCTIONS IN: binding; INVOLVED IN: biological_process unknown; LOCATED IN: cellular_component unknown; CONTAINS InterPro DOMAIN/s: Apoptosis inhibitory 5 (InterPro:IPR008383), Armadillo-type fold (InterPro:IPR016024); BEST Arabidopsis thaliana protein match is: Apoptosis inhibitory protein 5 (API5) (TAIR:AT2G34040.1); Has 834 Blast hits to 647 proteins in 1…	protein_coding			1.50809	3.01261	4.32005	0.000104123	0.0223088	1.24731
AT5G40840	AT5G40840.2	Cohesion family protein SYN2 (SYN2).	protein_coding	(SYN2)	(SYN2)	1.50682	1.83794	4.4277	7.48e-05	0.0187061	1.54451
AT3G45730	AT3G45730.1	unknown protein; Has 3 Blast hits to 3 proteins in 1 species: Archae - 0; Bacteria - 0; Metazoa - 0; Fungi - 0; Plants - 3; Viruses - 0; Other Eukaryotes - 0 (source: NCBI BLink).	protein_coding			1.50669	4.94069	4.40834	7.94e-05	0.0191691	1.30546
AT5G66052	AT5G66052.1	unknown protein; Has 30201 Blast hits to 17322 proteins in 780 species: Archae - 12; Bacteria - 1396; Metazoa - 17338; Fungi - 3422; Plants - 5037; Viruses - 0; Other Eukaryotes - 2996 (source: NCBI BLink).	protein_coding			1.48863	7.54899	4.44303	7.14e-05	0.0181501	1.41753
AT2G20560	AT2G20560.1	DNAJ heat shock family protein; FUNCTIONS IN: unfolded protein binding, heat shock protein binding; INVOLVED IN: protein folding; LOCATED IN: cellular_component unknown; EXPRESSED IN: 10 plant structures; EXPRESSED DURING: M germinated pollen stage, 4 anthesis, C globular stage, petal differentiation and expansion stage; CONTAINS InterPro DOMAIN/s: Molecular chaperone, heat shock protein, Hsp40, …	protein_coding			1.46769	1.96319	4.13342	0.000183611	0.0294296	0.713251
AT4G26780	AT4G26780.1	unknown function	protein_coding	(AR192)	(AR192);MITOCHONDRIAL GRPE 2 (MGE2)	1.45109	2.89672	4.05703	0.000231104	0.0336978	0.5375
AT5G46780	AT5G46780.1	VQ motif-containing protein; CONTAINS InterPro DOMAIN/s: VQ (InterPro:IPR008889); BEST Arabidopsis thaliana protein match is: VQ motif-containing protein (TAIR:AT2G35230.1); Has 4455 Blast hits to 3562 proteins in 419 species: Archae - 0; Bacteria - 294; Metazoa - 1785; Fungi - 574; Plants - 1062; Viruses - 216; Other Eukaryotes - 524 (source: NCBI BLink).	protein_coding			1.44956	4.22933	3.92211	0.000345779	0.0396357	0.0916626
AT1G60640	AT1G60640.1	unknown protein; Has 42416 Blast hits to 22533 proteins in 1340 species: Archae - 32; Bacteria - 6461; Metazoa - 16431; Fungi - 3749; Plants - 1747; Viruses - 284; Other Eukaryotes - 13712 (source: NCBI BLink).	protein_coding			1.44632	2.97399	3.93847	0.000329366	0.0394611	0.220526
AT3G62150	AT3G62150.1	P-glycoprotein 21 (PGP21); FUNCTIONS IN: ATPase activity, coupled to transmembrane movement of substances; INVOLVED IN: transport, transmembrane transport; LOCATED IN: plasma membrane; EXPRESSED IN: 14 plant structures; EXPRESSED DURING: 8 growth stages; CONTAINS InterPro DOMAIN/s: ATPase, AAA+ type, core (InterPro:IPR003593), ABC transporter-like (InterPro:IPR003439), ABC transporter, transmembr…	protein_coding	ATP-BINDING CASSETTE B21 (ABCB21)	ATP-BINDING CASSETTE B21 (ABCB21);P-GLYCOPROTEIN 21 (PGP21)	1.43386	5.42464	3.82223	0.000464579	0.0464513	-0.198951
AT1G75670	AT1G75670.1	DNA-directed RNA polymerases; FUNCTIONS IN: DNA-directed RNA polymerase activity; INVOLVED IN: transcription; LOCATED IN: cellular_component unknown; EXPRESSED IN: 22 plant structures; EXPRESSED DURING: 13 growth stages; CONTAINS InterPro DOMAIN/s: RNA polymerase Rpb7, N-terminal (InterPro:IPR005576); Has 67 Blast hits to 67 proteins in 26 species: Archae - 0; Bacteria - 0; Metazoa - 0; Fungi - 6…	protein_coding			1.41455	2.50197	5.02708	1.15e-05	0.00576056	3.18825
AT5G65530	AT5G65530.1	Protein kinase superfamily protein; FUNCTIONS IN: protein serine/threonine kinase activity, protein kinase activity, kinase activity, ATP binding; INVOLVED IN: protein amino acid phosphorylation; LOCATED IN: cellular_component unknown; EXPRESSED IN: 16 plant structures; EXPRESSED DURING: 8 growth stages; CONTAINS InterPro DOMAIN/s: Protein kinase, ATP binding site (InterPro:IPR017441), Serine/thr…	protein_coding			1.38928	2.56695	4.22729	0.000138158	0.0253258	0.826712
AT5G43500	AT5G43500.1	encodes a protein whose sequence is similar to actin-related proteins (ARPs) in other organisms. Member of nuclear ARP family of genes.	protein_coding	ACTIN-RELATED PROTEIN 9 (ARP9)	ACTIN-RELATED PROTEIN 9 (ARP9);ACTIN-RELATED PROTEIN 9 (ATARP9)	1.29255	4.53675	5.83032	8.94e-07	0.00104284	5.6448
AT5G17270	AT5G17270.1	Protein prenylyltransferase superfamily protein; FUNCTIONS IN: binding; INVOLVED IN: biological_process unknown; LOCATED IN: cellular_component unknown; EXPRESSED IN: 21 plant structures; EXPRESSED DURING: 10 growth stages; CONTAINS InterPro DOMAIN/s: Tetratricopeptide TPR-1 (InterPro:IPR001440), Tetratricopeptide-like helical (InterPro:IPR011990), Tetratricopeptide repeat-containing (InterPro:IP…	protein_coding			1.22121	3.68125	4.15287	0.000173129	0.0286235	0.771642
AT5G02490	AT5G02490.1	Heat shock protein 70 (Hsp 70) family protein; FUNCTIONS IN: protein binding; INVOLVED IN: protein folding, response to cadmium ion, response to heat, response to bacterium; LOCATED IN: cytosol, cell wall, plasma membrane; EXPRESSED IN: 19 plant structures; EXPRESSED DURING: 10 growth stages; CONTAINS InterPro DOMAIN/s: Heat shock protein 70, conserved site (InterPro:IPR018181), Heat shock protei…	protein_coding	(Hsp70-2)	(Hsp70-2); (AtHsp70-2)	1.21414	3.36805	3.97855	0.000292299	0.0376528	0.165284
AT4G23570	AT4G23570.3	Closely related to SGT1B, may function in SCF(TIR1) mediated protein degradation. AtSGT1a and AtSGT1b are functionally redundant in the resistance to pathogenes. AtSGT1b was more highly expressed than AtSGT1. The N-terminal TPR domain of AtSGT1a reduces the steady-state level of Arabidopsis SGT1 proteins whereas the same domain from AtSGT1b enhances SGT1 accumulation. The TPR domain is dispensabl…	protein_coding	(SGT1A)	(SGT1A)	1.19171	4.9114	4.76589	2.62e-05	0.0107825	2.45481
AT4G28510	AT4G28510.1	prohibitin 1 (Atphb1)	protein_coding	PROHIBITIN 1 (PHB1)	PROHIBITIN 1 (ATPHB1);PROHIBITIN 1 (PHB1)	1.1897	3.97056	4.46006	6.77e-05	0.0175754	1.62146
AT5G39840	AT5G39840.1	ATP-dependent RNA helicase, mitochondrial, putative; FUNCTIONS IN: helicase activity, ATP-dependent RNA helicase activity, nucleic acid binding, ATP binding; INVOLVED IN: biological_process unknown; LOCATED IN: mitochondrion; EXPRESSED IN: 14 plant structures; EXPRESSED DURING: 7 growth stages; CONTAINS InterPro DOMAIN/s: Mitochondrial degradasome RNA helicase subunit C-terminal (InterPro:IPR0221…	protein_coding			1.18701	2.84435	3.76405	0.000551093	0.0498763	-0.260373
AT5G48030	AT5G48030.1	encodes a mitochondrially targeted DNAJ protein involved in female gametophyte development.	protein_coding	GAMETOPHYTIC FACTOR 2 (GFA2)	GAMETOPHYTIC FACTOR 2 (GFA2)	1.18129	4.24818	4.62423	4.07e-05	0.0144988	2.08338
AT1G12650	AT1G12650.1	unknown protein; CONTAINS InterPro DOMAIN/s: Protein of unknown function DUF947 (InterPro:IPR009292); Has 700 Blast hits to 631 proteins in 192 species: Archae - 0; Bacteria - 32; Metazoa - 138; Fungi - 168; Plants - 60; Viruses - 0; Other Eukaryotes - 302 (source: NCBI BLink).	protein_coding			1.16837	3.85011	3.75895	0.000559391	0.049981	-0.316458
AT1G58235	AT1G58235.1	unknown protein; Has 3 Blast hits to 3 proteins in 1 species: Archae - 0; Bacteria - 0; Metazoa - 0; Fungi - 0; Plants - 3; Viruses - 0; Other Eukaryotes - 0 (source: NCBI BLink).	protein_coding			1.14835	5.82264	4.02342	0.000255608	0.0355068	0.173488
AT3G03640	AT3G03640.1	Encodes beta-glucosidase (GLUC).	protein_coding	BETA GLUCOSIDASE 25 (BGLU25)	(GLUC);BETA GLUCOSIDASE 25 (BGLU25)	1.14435	4.77438	5.26671	5.39e-06	0.00377558	3.87805
AT4G20090	AT4G20090.1	embryo defective 1025 (EMB1025); CONTAINS InterPro DOMAIN/s: Pentatricopeptide repeat (InterPro:IPR002885); BEST Arabidopsis thaliana protein match is: Pentatricopeptide repeat (PPR) superfamily protein (TAIR:AT5G64320.1); Has 50788 Blast hits to 13881 proteins in 299 species: Archae - 2; Bacteria - 48; Metazoa - 729; Fungi - 797; Plants - 47488; Viruses - 0; Other Eukaryotes - 1724 (source: NCBI…	protein_coding	EMBRYO DEFECTIVE 1025 (EMB1025)	EMBRYO DEFECTIVE 1025 (EMB1025)	1.13437	2.38624	4.3925	8.34e-05	0.019872	1.45428
AT1G79150	AT1G79150.1	binding; FUNCTIONS IN: binding; INVOLVED IN: biological_process unknown; LOCATED IN: cellular_component unknown; EXPRESSED IN: 23 plant structures; EXPRESSED DURING: 13 growth stages; CONTAINS InterPro DOMAIN/s: CCAAT-binding factor (InterPro:IPR005612), Armadillo-type fold (InterPro:IPR016024), Nucleolar complex-associated (InterPro:IPR011501); Has 3184 Blast hits to 2630 proteins in 361 species…	protein_coding			1.12386	3.62481	3.99786	0.000275924	0.0366193	0.340329
AT1G31280	AT1G31280.1	Encodes Argonaute gene that binds viral siRNAs and is involved in antiviral defense response. Regulates innate immunity.	protein_coding	ARGONAUTE 2 (AGO2)	ARGONAUTE 2 (AGO2)	1.11567	4.1705	6.53046	9.55e-08	0.000162084	7.79265
AT5G48240	AT5G48240.3	unknown protein; FUNCTIONS IN: molecular_function unknown; INVOLVED IN: biological_process unknown; CONTAINS InterPro DOMAIN/s: Protein of unknown function DUF1665 (InterPro:IPR012459); Has 286 Blast hits to 283 proteins in 145 species: Archae - 0; Bacteria - 2; Metazoa - 103; Fungi - 97; Plants - 41; Viruses - 1; Other Eukaryotes - 42 (source: NCBI BLink).	protein_coding			1.09968	3.54017	3.87062	0.000402769	0.0431477	0.0171732
AT2G30250	AT2G30250.1	member of WRKY Transcription Factor; Group I. Located in nucleus. Involved in response to various abiotic stresses - especially salt stress.	protein_coding	WRKY DNA-BINDING PROTEIN 25 (WRKY25)	WRKY DNA-BINDING PROTEIN 25 (WRKY25); (AtWRKY25)	1.02197	5.09036	3.80895	0.000483089	0.0470244	-0.379833
AT2G32950	AT2G32950.1	Represses photomorphogenesis and induces skotomorphogenesis in the dark. Contains a ring finger zinc-binding motif, a coiled-coil domain, and several WD-40 repeats, similar to G-beta proteins. The C-terminus has homology to TAFII80, a subunit of the TFIID component of the RNA polymerase II of Drosophila. Nuclear localization in the dark and cytoplasmic in the light.	protein_coding	CONSTITUTIVE PHOTOMORPHOGENIC 1 (COP1)	EMBRYO DEFECTIVE 168 (EMB168);FUSCA 1 (FUS1);CONSTITUTIVE PHOTOMORPHOGENIC 1 (COP1);ARABIDOPSIS THALIANA CONSTITUTIVE PHOTOMORPHOGENIC 1 (ATCOP1);DEETIOLATED MUTANT 340 (DET340)	1.00454	-2.35544	4.06134	0.00022813	0.0335353	0.411044
AT2G32560	AT2G32560.1	F-box family protein; FUNCTIONS IN: molecular_function unknown; INVOLVED IN: biological_process unknown; LOCATED IN: endomembrane system; EXPRESSED IN: 22 plant structures; EXPRESSED DURING: 13 growth stages; CONTAINS InterPro DOMAIN/s: F-box domain, cyclin-like (InterPro:IPR001810), F-box domain, Skp2-like (InterPro:IPR022364); BEST Arabidopsis thaliana protein match is: F-box family protein (TA…	protein_coding			-1.01544	5.40174	-3.7695	0.000542371	0.0497316	-0.507576
AT3G10340	AT3G10340.1	Encodes PAL4, a putative a phenylalanine ammonia-lyase. Arabidopsis has four PALs: AT2G37040 (PAL1), AT3G53260 (PAL2), AT5G04230 (PAL3) and AT3G10340 (PAL4).	protein_coding	PHENYLALANINE AMMONIA-LYASE 4 (PAL4)	PHENYLALANINE AMMONIA-LYASE 4 (PAL4)	-1.02291	4.32589	-4.67626	3.46e-05	0.0129912	2.09123
AT3G61700	AT3G61700.2	Plant protein 1589 of unknown function; FUNCTIONS IN: molecular_function unknown; INVOLVED IN: biological_process unknown; LOCATED IN: cellular_component unknown; EXPRESSED IN: 20 plant structures; EXPRESSED DURING: 13 growth stages; CONTAINS InterPro DOMAIN/s: Conserved hypothetical protein CHP01589, plant (InterPro:IPR006476); BEST Arabidopsis thaliana protein match is: Plant protein 1589 of un…	protein_coding			-1.02687	4.91154	-4.44138	7.17e-05	0.0181501	1.38486
AT5G11260	AT5G11260.1	Basic leucine zipper (bZIP) transcription factor. Nuclear localization. Involved in light-regulated transcriptional activation of G-box-containing promoters. Negatively regulated by Cop1. Although cytokinins do not appear to affect the gene's promoter activity, they appear to stabilize the protein. HY5 plays a role in anthocyanin accumulation in far-red light and blue light, but not in red light …	protein_coding	ELONGATED HYPOCOTYL 5 (HY5)	REVERSAL OF THE DET PHENOTYPE 5 (TED 5);ELONGATED HYPOCOTYL 5 (HY5)	-1.03101	1.24138	-5.25999	7.51e-06	0.00442521	3.6662
AT2G39855	AT2G39855.1	unknown protein; FUNCTIONS IN: molecular_function unknown; INVOLVED IN: biological_process unknown; LOCATED IN: chloroplast; BEST Arabidopsis thaliana protein match is: unknown protein (TAIR:AT3G55646.1); Has 35333 Blast hits to 34131 proteins in 2444 species: Archae - 798; Bacteria - 22429; Metazoa - 974; Fungi - 991; Plants - 531; Viruses - 0; Other Eukaryotes - 9610 (source: NCBI BLink).	protein_coding			-1.03894	-0.926658	-4.0216	0.000257004	0.0355068	0.429522
AT2G20260	AT2G20260.1	Encodes subunit E of photosystem I.	protein_coding	PHOTOSYSTEM I SUBUNIT E-2 (PSAE-2)	PHOTOSYSTEM I SUBUNIT E-2 (PSAE-2)	-1.04192	6.9177	-4.21403	0.000143837	0.0255723	0.71961
AT3G61470	AT3G61470.1	Encodes a component of the light harvesting antenna complex of photosystem I.	protein_coding	PHOTOSYSTEM I LIGHT HARVESTING COMPLEX GENE 2 (LHCA2)	PHOTOSYSTEM I LIGHT HARVESTING COMPLEX GENE 2 (LHCA2)	-1.04395	9.22311	-4.25384	0.000127436	0.0245131	0.882886
AT1G70890	AT1G70890.1	MLP-like protein 43 (MLP43); FUNCTIONS IN: molecular_function unknown; INVOLVED IN: response to biotic stimulus, defense response; LOCATED IN: chloroplast; EXPRESSED IN: 17 plant structures; EXPRESSED DURING: 10 growth stages; CONTAINS InterPro DOMAIN/s: Bet v I allergen (InterPro:IPR000916); BEST Arabidopsis thaliana protein match is: MLP-like protein 28 (TAIR:AT1G70830.5); Has 440 Blast hits to…	protein_coding	MLP-LIKE PROTEIN 43 (MLP43)	MLP-LIKE PROTEIN 43 (MLP43)	-1.06025	4.73739	-4.25626	0.0001265	0.0245131	0.882349
AT3G62750	AT3G62750.1	beta glucosidase 8 (BGLU8); FUNCTIONS IN: cation binding, hydrolase activity, hydrolyzing O-glycosyl compounds, catalytic activity; INVOLVED IN: carbohydrate metabolic process; LOCATED IN: vacuole; CONTAINS InterPro DOMAIN/s: Glycoside hydrolase, family 1 (InterPro:IPR001360), Glycoside hydrolase, family 1, active site (InterPro:IPR018120), Glycoside hydrolase, catalytic core (InterPro:IPR017853)…	protein_coding	BETA GLUCOSIDASE 8 (BGLU8)	BETA GLUCOSIDASE 8 (BGLU8)	-1.0616	5.76617	-5.25024	5.68e-06	0.00384992	3.84397
AT1G29025	AT1G29025.1	Calcium-binding EF-hand family protein; FUNCTIONS IN: calcium ion binding; LOCATED IN: endomembrane system; CONTAINS InterPro DOMAIN/s: EF-Hand 1, calcium-binding site (InterPro:IPR018247), EF-HAND 2 (InterPro:IPR018249), Calcium-binding EF-hand (InterPro:IPR002048), EF-hand-like domain (InterPro:IPR011992); BEST Arabidopsis thaliana protein match is: Calcium-binding EF-hand family protein (TAIR:…	protein_coding			-1.06248	1.79902	-4.22598	0.000138708	0.0253258	0.762083
AT4G30170	AT4G30170.1	Peroxidase family protein; FUNCTIONS IN: peroxidase activity, heme binding; INVOLVED IN: oxidation reduction, response to oxidative stress; LOCATED IN: endomembrane system; EXPRESSED IN: hypocotyl, root; CONTAINS InterPro DOMAIN/s: Haem peroxidase (InterPro:IPR010255), Plant peroxidase (InterPro:IPR000823), Peroxidases heam-ligand binding site (InterPro:IPR019793), Haem peroxidase, plant/fungal/b…	protein_coding			-1.07861	2.18475	-5.21193	6.42e-06	0.00403125	3.71003
AT5G13870	AT5G13870.1	EXGT-A4, endoxyloglucan transferase,	protein_coding	XYLOGLUCAN ENDOTRANSGLUCOSYLASE/HYDROLASE 5 (XTH5)	ENDOXYLOGLUCAN TRANSFERASE A4 (EXGT-A4);XYLOGLUCAN ENDOTRANSGLUCOSYLASE/HYDROLASE 5 (XTH5)	-1.08704	3.43084	-3.99745	0.000276257	0.0366193	0.262274
AT5G66460	AT5G66460.1	Encodes a endo-beta-mannanase involved in seed germination.	protein_coding	ENDO-BETA-MANNASE 7 (MAN7)	ENDO-BETA-MANNASE 7 (MAN7); (AtMAN7)	-1.11548	3.2358	-4.32554	0.000102388	0.0222735	1.19512
AT1G32060	AT1G32060.1	phosphoribulokinase (PRK); FUNCTIONS IN: protein binding, phosphoribulokinase activity, ATP binding; INVOLVED IN: response to cold, defense response to bacterium, biosynthetic process, peptidyl-cysteine S-nitrosylation; LOCATED IN: in 8 components; EXPRESSED IN: 24 plant structures; EXPRESSED DURING: 15 growth stages; CONTAINS InterPro DOMAIN/s: Phosphoribulokinase/uridine kinase (InterPro:IPR006…	protein_coding	PHOSPHORIBULOKINASE (PRK)	PHOSPHORIBULOKINASE (PRK)	-1.11696	7.72798	-4.30844	0.000107885	0.0226434	1.01152
AT3G29320	AT3G29320.1	Encodes a plastidic alpha-glucan phosphorylase. In vitro, the enzyme has a preference for maltooligosaccharides, such as maltoheptaose.	protein_coding	ALPHA-GLUCAN PHOSPHORYLASE 1 (PHS1)	ALPHA-GLUCAN PHOSPHORYLASE 1 (PHS1)	-1.11752	6.58219	-3.78321	0.000521016	0.0488073	-0.462002
AT4G02770	AT4G02770.1	Encodes a protein predicted by sequence similarity with spinach PsaD to be photosystem I reaction center subunit II (PsaD1)	protein_coding	PHOTOSYSTEM I SUBUNIT D-1 (PSAD-1)	PHOTOSYSTEM I SUBUNIT D-1 (PSAD-1)	-1.11982	7.99435	-4.01066	0.000265558	0.0357431	0.148166
AT2G39450	AT2G39450.1	Encodes a Golgi-localized manganese transporter that is involved in Mn tolerance. When expressed into yeast cells, this gene confer Mn<sup>2+</sup> and Cu<sup>2+</sup> tolerance.	protein_coding	(MTP11)	(MTP11); (ATMTP11)	-1.12417	4.89551	-5.73855	1.2e-06	0.00132475	5.36334
AT3G17070	AT3G17070.1	Peroxidase family protein; FUNCTIONS IN: peroxidase activity, heme binding; INVOLVED IN: response to oxidative stress, oxidation reduction; LOCATED IN: endomembrane system; EXPRESSED IN: guard cell; CONTAINS InterPro DOMAIN/s: Haem peroxidase (InterPro:IPR010255), Plant peroxidase (InterPro:IPR000823), Haem peroxidase, plant/fungal/bacterial (InterPro:IPR002016); BEST Arabidopsis thaliana protein…	protein_coding			-1.12783	2.81279	-5.0403	1.11e-05	0.00576056	3.27953
AT1G71960	AT1G71960.1	Encodes a plasma membrane localized ABC transporter involved in abscisic acid transport and responses.	protein_coding	ATP-BINDING CASETTE G25 (ABCG25)	ATP-BINDING CASETTE G25 (ABCG25);ARABIDOPSIS THALIANA ATP-BINDING CASSETTE G25 (ATABCG25)	-1.1478	4.58066	-3.88277	0.000388549	0.0427137	-0.194033
AT1G53450	AT1G53450.1	unknown protein; BEST Arabidopsis thaliana protein match is: unknown protein (TAIR:AT3G14830.2); Has 71 Blast hits to 71 proteins in 12 species: Archae - 0; Bacteria - 0; Metazoa - 0; Fungi - 0; Plants - 71; Viruses - 0; Other Eukaryotes - 0 (source: NCBI BLink).	protein_coding			-1.15166	5.03718	-4.78346	2.48e-05	0.0105185	2.40953
AT2G35260	AT2G35260.1	unknown protein; FUNCTIONS IN: molecular_function unknown; INVOLVED IN: biological_process unknown; LOCATED IN: chloroplast; EXPRESSED IN: 21 plant structures; EXPRESSED DURING: 13 growth stages; BEST Arabidopsis thaliana protein match is: unknown protein (TAIR:AT4G17840.1); Has 42 Blast hits to 42 proteins in 14 species: Archae - 0; Bacteria - 0; Metazoa - 0; Fungi - 0; Plants - 42; Viruses - 0;…	protein_coding			-1.16706	5.56356	-4.25322	0.000127678	0.0245131	0.848437
AT1G04220	AT1G04220.1	Encodes KCS2, a member of the 3-ketoacyl-CoA synthase family involved in the biosynthesis of VLCFA (very long chain fatty acids).	protein_coding	3-KETOACYL-COA SYNTHASE 2 (KCS2)	3-KETOACYL-COA SYNTHASE 2 (KCS2)	-1.16797	3.05225	-5.42794	3.23e-06	0.00266665	4.39905
AT1G10760	AT1G10760.1	Encodes an &#945;-glucan, water dikinase required for starch degradation. Involved in cold-induced freezing tolerance. Mutations that eliminate the GWD protein or affect the dikinase domain of the enzyme dramatically reduce both the amount of phosphate in the amylopectin and the rate of starch degradation. Mature leaves of these mutants accumulate amounts of starch up to seven times greater than …	protein_coding	STARCH EXCESS 1 (SEX1)	(GWD1); (SOP); (SOP1);STARCH EXCESS 1 (SEX1); (GWD)	-1.17207	7.80501	-3.84339	0.000436492	0.0442754	-0.333519
AT5G58330	AT5G58330.1	lactate/malate dehydrogenase family protein; FUNCTIONS IN: oxidoreductase activity, binding, malate dehydrogenase activity, catalytic activity, malate dehydrogenase (NADP+) activity; INVOLVED IN: oxidation reduction, malate metabolic process, carbohydrate metabolic process, metabolic process; LOCATED IN: in 6 components; EXPRESSED IN: 23 plant structures; EXPRESSED DURING: 14 growth stages; CONTA…	protein_coding			-1.18508	6.60829	-4.15362	0.000172737	0.0286235	0.546536
AT5G66570	AT5G66570.1	Encodes a protein which is an extrinsic subunit of photosystem II and which has been proposed to play a central role in stabilization of the catalytic manganese cluster. In <i>Arabidopsis thaliana</i> the PsbO proteins are encoded by two genes: <i>psbO1</i> and <i>psbO2</i>. PsbO1 is the major isoform in the wild-type.	protein_coding	PS II OXYGEN-EVOLVING COMPLEX 1 (PSBO1)	PS II OXYGEN-EVOLVING COMPLEX 1 (PSBO-1);33 KDA OXYGEN EVOLVING POLYPEPTIDE 1 (OEE1);OXYGEN EVOLVING ENHANCER PROTEIN 33 (OEE33);OXYGEN EVOLVING COMPLEX 33 KILODALTON PROTEIN (OE33);MANGANESE-STABILIZING PROTEIN 1 (MSP-1);PS II OXYGEN-EVOLVING COMPLEX 1 (PSBO1)	-1.19388	9.9587	-4.41505	7.78e-05	0.0189957	1.36302
AT1G52910	AT1G52910.1	Protein of unknown function (DUF1218); FUNCTIONS IN: molecular_function unknown; INVOLVED IN: biological_process unknown; LOCATED IN: endomembrane system; EXPRESSED IN: 20 plant structures; EXPRESSED DURING: 13 growth stages; CONTAINS InterPro DOMAIN/s: Protein of unknown function DUF1218 (InterPro:IPR009606); BEST Arabidopsis thaliana protein match is: Protein of unknown function (DUF1218) (TAIR…	protein_coding			-1.19763	2.43797	-3.80942	0.000482423	0.0470244	-0.177912
AT4G38330	AT4G38330.1	Integral membrane protein hemolysin-III homolog; FUNCTIONS IN: molecular_function unknown; INVOLVED IN: biological_process unknown; LOCATED IN: integral to membrane; EXPRESSED IN: male gametophyte, pollen tube; EXPRESSED DURING: L mature pollen stage, M germinated pollen stage; CONTAINS InterPro DOMAIN/s: Hly-III related (InterPro:IPR004254); BEST Arabidopsis thaliana protein match is: Haemolysin…	protein_coding			-1.19805	1.5662	-4.03626	0.00024596	0.0353247	0.409402
AT2G22540	AT2G22540.1	Encodes a nuclear protein that acts as a floral repressor and that functions within the thermosensory pathway. SVP represses FT expression via direct binding to the vCArG III motif in the FT promoter.	protein_coding	SHORT VEGETATIVE PHASE (SVP)	AGAMOUS-LIKE 22 (AGL22);SHORT VEGETATIVE PHASE (SVP)	-1.19891	5.73794	-6.51505	1e-07	0.000162084	7.74682
AT5G25610	AT5G25610.1	responsive to dehydration 22 (RD22) mediated by ABA	protein_coding	RESPONSIVE TO DESSICATION 22 (RD22)	RESPONSIVE TO DESSICATION 22 (RD22); (ATRD22)	-1.20004	6.89413	-4.56795	4.85e-05	0.0156735	1.76006
AT1G07985	AT1G07985.1	Expressed protein; FUNCTIONS IN: molecular_function unknown; INVOLVED IN: biological_process unknown; LOCATED IN: chloroplast; Has 35333 Blast hits to 34131 proteins in 2444 species: Archae - 798; Bacteria - 22429; Metazoa - 974; Fungi - 991; Plants - 531; Viruses - 0; Other Eukaryotes - 9610 (source: NCBI BLink).	protein_coding			-1.20412	1.74042	-4.07094	0.000221643	0.0327734	0.330113
AT1G35420	AT1G35420.2	alpha/beta-Hydrolases superfamily protein; FUNCTIONS IN: hydrolase activity; INVOLVED IN: biological_process unknown; EXPRESSED IN: 22 plant structures; EXPRESSED DURING: 13 growth stages; CONTAINS InterPro DOMAIN/s: Dienelactone hydrolase (InterPro:IPR002925); BEST Arabidopsis thaliana protein match is: alpha/beta-Hydrolases superfamily protein (TAIR:AT3G23600.1).	protein_coding			-1.23302	4.45763	-4.18294	0.000158066	0.027429	0.691721
AT1G14600	AT1G14600.1	Homeodomain-like superfamily protein; CONTAINS InterPro DOMAIN/s: Myb, DNA-binding (InterPro:IPR014778), Homeodomain-like (InterPro:IPR009057), Homeodomain-related (InterPro:IPR012287), HTH transcriptional regulator, Myb-type, DNA-binding (InterPro:IPR017930), Myb-like DNA-binding domain, SHAQKYF class (InterPro:IPR006447); BEST Arabidopsis thaliana protein match is: Homeodomain-like superfamily …	protein_coding			-1.28671	1.73653	-4.14474	0.000177438	0.0289635	0.773373
AT1G06680	AT1G06680.1	Encodes a 23 kD extrinsic protein that is part of photosystem II and participates in the regulation of oxygen evolution. Phosphorylation of this protein is dependent on calcium.	protein_coding	PHOTOSYSTEM II SUBUNIT P-1 (PSBP-1)	OXYGEN EVOLVING COMPLEX SUBUNIT 23 KDA (OE23);PHOTOSYSTEM II SUBUNIT P-1 (PSBP-1);OXYGEN-EVOLVING ENHANCER PROTEIN 2 (OEE2);PHOTOSYSTEM II SUBUNIT P (PSII-P)	-1.30461	9.08493	-4.36302	9.13e-05	0.0206098	1.18584
AT3G08940	AT3G08940.2	Lhcb4.2 protein (Lhcb4.2, protein involved in the light harvesting complex of photosystem II	protein_coding	LIGHT HARVESTING COMPLEX PHOTOSYSTEM II (LHCB4.2)	LIGHT HARVESTING COMPLEX PHOTOSYSTEM II (LHCB4.2)	-1.33977	9.16863	-4.21951	0.000141461	0.0253868	0.785955
AT2G31751	AT2G31751.1	Potential natural antisense gene, locus overlaps with AT2G31750	other_rna			-1.34372	1.5712	-4.73152	2.92e-05	0.0117747	2.38929
AT5G35630	AT5G35630.1	chloroplastic glutamine synthetase	protein_coding	GLUTAMINE SYNTHETASE 2 (GS2)	GLUTAMINE SYNTHETASE LIKE 1 (ATGSL1);GLUTAMINE SYNTHETASE 2 (GS2);GLUTAMINE SYNTHETASE 2 (GLN2)	-1.34663	9.08859	-3.89239	0.000377644	0.0424032	-0.173554
AT4G37580	AT4G37580.1	involved in apical hook development. putative N-acetyltransferase	protein_coding	HOOKLESS 1 (HLS1)	CONSTITUTIVE PHOTOMORPHOGENIC 3 (COP3);UNUSUAL SUGAR RESPONSE 2 (UNS2);HOOKLESS 1 (HLS1)	-1.34749	3.81022	-4.13031	0.000185343	0.0294578	0.508157
AT4G11320	AT4G11320.1	Papain family cysteine protease; FUNCTIONS IN: cysteine-type endopeptidase activity, cysteine-type peptidase activity; INVOLVED IN: proteolysis; LOCATED IN: endomembrane system; CONTAINS InterPro DOMAIN/s: Proteinase inhibitor I29, cathepsin propeptide (InterPro:IPR013201), Peptidase C1A, papain (InterPro:IPR013128), Peptidase C1A, papain C-terminal (InterPro:IPR000668), Peptidase, cysteine pepti…	protein_coding			-1.34869	6.73021	-3.78939	0.000511651	0.0486115	-0.428324
AT3G46970	AT3G46970.1	Encodes a cytosolic alpha-glucan phosphorylase. In vitro, the enzyme has a preference for branched polysaccharides, such as glycogen.	protein_coding	ALPHA-GLUCAN PHOSPHORYLASE 2 (PHS2)	ALPHA-GLUCAN PHOSPHORYLASE 2 (PHS2);ARABIDOPSIS THALIANA ALPHA-GLUCAN PHOSPHORYLASE 2 (ATPHS2)	-1.36624	6.24297	-4.04439	0.000240039	0.0347594	0.346881
AT4G15490	AT4G15490.1	Encodes a protein that might have sinapic acid:UDP-glucose glucosyltransferase activity.	protein_coding	(UGT84A3)	(UGT84A3)	-1.37576	3.17675	-3.84804	0.000430547	0.0438844	-0.0986238
AT4G30290	AT4G30290.1	Encodes a xyloglucan endotransglucosylase/hydrolase with only only the endotransglucosylase (XET; EC 2.4.1.207) activity towards xyloglucan and non-detectable endohydrolytic (XEH; EC 3.2.1.151) activity. Expressed throughout both the main and the lateral root, with intensive expression at the dividing and elongating regions. Is expressed in lateral root primordia but expression ceases after later…	protein_coding	XYLOGLUCAN ENDOTRANSGLUCOSYLASE/HYDROLASE 19 (XTH19)	XYLOGLUCAN ENDOTRANSGLUCOSYLASE/HYDROLASE 19 (XTH19);XYLOGLUCAN ENDOTRANSGLUCOSYLASE/HYDROLASE 19 (ATXTH19)	-1.38228	3.1248	-4.84872	2.02e-05	0.00922171	2.61126
AT1G53470	AT1G53470.1	mechanosensitive channel of small conductance-like 4 (MSL4); INVOLVED IN: transmembrane transport; LOCATED IN: plasma membrane, membrane; CONTAINS InterPro DOMAIN/s: Membrane protein, At2g17000, predicted (InterPro:IPR016688), Mechanosensitive ion channel MscS (InterPro:IPR006685), Like-Sm ribonucleoprotein (LSM)-related domain (InterPro:IPR010920); BEST Arabidopsis thaliana protein match is: mec…	protein_coding	MECHANOSENSITIVE CHANNEL OF SMALL CONDUCTANCE-LIKE 4 (MSL4)	MECHANOSENSITIVE CHANNEL OF SMALL CONDUCTANCE-LIKE 4 (MSL4)	-1.39092	1.62584	-3.93632	0.000331478	0.0394611	0.218264
AT1G09540	AT1G09540.1	Encodes putative transcription factor. Mutants lack of mucilage extrusion from the seeds during imbibition. Reduced quantities of mucilage are deposited during the development of the seed coat epidermis in myb61 mutants. Expressed in guard cells,loss of function mutations show an increase in stomatal pore opening suggesting a role in ABA independent regulation of stomatal pore size.	protein_coding	MYB DOMAIN PROTEIN 61 (MYB61)	ARABIDOPSIS THALIANA MYB DOMAIN PROTEIN 61 (ATMYB61);MYB DOMAIN PROTEIN 61 (MYB61)	-1.43632	-0.356868	-3.78039	0.000525335	0.0488073	-0.187789
AT2G39800	AT2G39800.1	encodes a delta1-pyrroline-5-carboxylate synthase that catalyzes the rate-limiting enzyme in the biosynthesis of proline. Gene is expressed in reproductive organs and tissues under non-stress conditions but in the whole plant under water-limiting condition. Expression is also induced by abscisic acid and salt stress in a light-dependent manner. encodes a delta1-pyrroline-5-carboxylate synthase th…	protein_coding	DELTA1-PYRROLINE-5-CARBOXYLATE SYNTHASE 1 (P5CS1)	DELTA1-PYRROLINE-5-CARBOXYLATE SYNTHASE 1 (P5CS1); (ATP5CS)	-1.49657	5.92178	-4.25932	0.000125327	0.0245131	0.916935
AT5G52300	AT5G52300.1	encodes a protein that is induced in expression in response to water deprivation such as cold, high-salt, and dessication. The response appears to be via abscisic acid. The promoter region contains two ABA-responsive elements (ABREs) that are required for the dehydration-responsive expression of rd29B as cis-acting elements. Protein is a member of a gene family with other members found plants, an…	protein_coding	LOW-TEMPERATURE-INDUCED 65 (LTI65)	RESPONSIVE TO DESSICATION 29B (RD29B);LOW-TEMPERATURE-INDUCED 65 (LTI65)	-1.49804	2.02249	-4.22008	0.000141219	0.0253868	0.752153
AT3G57010	AT3G57010.1	Calcium-dependent phosphotriesterase superfamily protein; FUNCTIONS IN: strictosidine synthase activity; INVOLVED IN: alkaloid biosynthetic process, biosynthetic process; LOCATED IN: endoplasmic reticulum; EXPRESSED IN: 9 plant structures; EXPRESSED DURING: 4 anthesis, petal differentiation and expansion stage; CONTAINS InterPro DOMAIN/s: Strictosidine synthase (InterPro:IPR004141), Strictosidine…	protein_coding			-1.50192	1.54457	-4.09223	0.000207893	0.0311794	0.603478
AT2G35830	AT2G35830.2	unknown protein; FUNCTIONS IN: molecular_function unknown; INVOLVED IN: biological_process unknown; LOCATED IN: cellular_component unknown; BEST Arabidopsis thaliana protein match is: unknown protein (TAIR:AT2G35810.1).	protein_coding			-1.50592	3.41627	-3.8554	0.000421301	0.0436008	-0.0476918
AT5G67020	AT5G67020.1	unknown protein; BEST Arabidopsis thaliana protein match is: unknown protein (TAIR:AT3G50340.1); Has 1807 Blast hits to 1807 proteins in 277 species: Archae - 0; Bacteria - 0; Metazoa - 736; Fungi - 347; Plants - 385; Viruses - 0; Other Eukaryotes - 339 (source: NCBI BLink).	protein_coding			-1.50685	1.21497	-3.78536	0.000517745	0.0487493	-0.229175
AT1G70850	AT1G70850.1	MLP-like protein 34 (MLP34); FUNCTIONS IN: molecular_function unknown; INVOLVED IN: response to biotic stimulus, defense response; LOCATED IN: cellular_component unknown; EXPRESSED IN: 6 plant structures; EXPRESSED DURING: 4 anthesis, petal differentiation and expansion stage; CONTAINS InterPro DOMAIN/s: Bet v I allergen (InterPro:IPR000916); BEST Arabidopsis thaliana protein match is: MLP-like p…	protein_coding	MLP-LIKE PROTEIN 34 (MLP34)	MLP-LIKE PROTEIN 34 (MLP34)	-1.51716	3.01801	-9.43977	1.29e-11	6.76e-08	16.3715
AT5G23220	AT5G23220.1	nicotinamidase 3 (NIC3); FUNCTIONS IN: nicotinamidase activity, catalytic activity; INVOLVED IN: metabolic process; EXPRESSED IN: root; CONTAINS InterPro DOMAIN/s: Isochorismatase-like (InterPro:IPR000868); BEST Arabidopsis thaliana protein match is: nicotinamidase 2 (TAIR:AT5G23230.1); Has 1807 Blast hits to 1807 proteins in 277 species: Archae - 0; Bacteria - 0; Metazoa - 736; Fungi - 347; Plan…	protein_coding	NICOTINAMIDASE 3 (NIC3)	NICOTINAMIDASE 3 (NIC3)	-1.53689	-0.291207	-4.5894	4.54e-05	0.0151297	2.00683
AT4G15560	AT4G15560.1	Encodes a protein with 1-deoxyxylulose 5-phosphate synthase activity involved in the MEP pathway. It is essential for chloroplast development in Arabidopsis	protein_coding	CLOROPLASTOS ALTERADOS 1 (CLA1)	(AtCLA1);1-DEOXY-D-XYLULOSE 5-PHOSPHATE SYNTHASE 2 (DXPS2);CLOROPLASTOS ALTERADOS 1 (CLA1); (CLA); (DEF);1-DEOXY-D-XYLULOSE 5-PHOSPHATE SYNTHASE (DXS)	-1.55187	0.947427	-4.54774	5.17e-05	0.0172187	1.52635
AT4G34350	AT4G34350.1	Arabidopsis ISPH is involved in the plastid nonmevalonate pathway of isoprenoid biosynthesis. It was shown to complement the lethal phenotype of E. coli ispH mutant and is therefore most likely encodes a protein with 4-hydroxy-3-methylbut-2-en-1-yl diphosphate reductase activity involved in the last step of mevalonate-independent isopentenyl biosynthesis. Mutant has Albino seedling.	protein_coding	4-HYDROXY-3-METHYLBUT-2-ENYL DIPHOSPHATE REDUCTASE (HDR)	4-HYDROXY-3-METHYLBUT-2-ENYL DIPHOSPHATE REDUCTASE (HDR); (ISPH);CHLOROPLAST BIOGENESIS 6 (CLB6)	-1.58978	1.36703	-7.38532	5.41e-09	8.44e-06	9.98687
AT5G60760	AT5G60760.1	P-loop containing nucleoside triphosphate hydrolases superfamily protein; BEST Arabidopsis thaliana protein match is: P-loop containing nucleoside triphosphate hydrolases superfamily protein (TAIR:AT3G45090.1); Has 1216 Blast hits to 969 proteins in 195 species: Archae - 93; Bacteria - 85; Metazoa - 220; Fungi - 67; Plants - 127; Viruses - 43; Other Eukaryotes - 581 (source: NCBI BLink).	protein_coding			-1.63086	2.14977	-4.2359	0.000134586	0.0253258	0.835291
AT1G55180	AT1G55180.1	member of C2-PLD. subfamily Represents a phospholipase D (PLD) gene with four exons, hence it is a member of the alpha class. Its amino acid sequence is quite different from other PLDs, therefore it might possess unique structural and/or catalytic properties.	protein_coding	PHOSPHOLIPASE D ALPHA 4 (PLDEPSILON)	PHOSPHOLIPASE D ALPHA 4 (PLDEPSILON); (PLDALPHA4)	-1.65104	1.04529	-3.79232	0.000507271	0.0484144	-0.158499
AT1G75710	AT1G75710.1	C2H2-like zinc finger protein; FUNCTIONS IN: sequence-specific DNA binding transcription factor activity, zinc ion binding, nucleic acid binding; LOCATED IN: intracellular; EXPRESSED IN: 22 plant structures; EXPRESSED DURING: 13 growth stages; CONTAINS InterPro DOMAIN/s: Zinc finger, C2H2-like (InterPro:IPR015880), Zinc finger, C2H2-type (InterPro:IPR007087); BEST Arabidopsis thaliana protein mat…	protein_coding			-1.65279	4.00033	-4.46357	6.7e-05	0.0175754	1.57701
AT2G16740	AT2G16740.1	ubiquitin-conjugating enzyme 29 (UBC29); CONTAINS InterPro DOMAIN/s: Ubiquitin-conjugating enzyme/RWD-like (InterPro:IPR016135), Ubiquitin-conjugating enzyme, E2 (InterPro:IPR000608); BEST Arabidopsis thaliana protein match is: ubiquitin-conjugating enzyme 10 (TAIR:AT5G53300.4); Has 10587 Blast hits to 10548 proteins in 402 species: Archae - 0; Bacteria - 4; Metazoa - 4577; Fungi - 2332; Plants -…	protein_coding	UBIQUITIN-CONJUGATING ENZYME 29 (UBC29)	UBIQUITIN-CONJUGATING ENZYME 29 (UBC29)	-1.66061	4.34582	-6.23245	2.47e-07	0.000346043	6.8866
AT3G01510	AT3G01510.1	Encodes a putative phosphatase, LSF1, required for normal starch turnover in leaves.	protein_coding	LIKE SEX4 1 (LSF1)	LIKE SEX4 1 (LSF1)	-1.67297	3.73679	-3.9206	0.000347334	0.0396357	0.14095
AT2G26695	AT2G26695.1	Ran BP2/NZF zinc finger-like superfamily protein; FUNCTIONS IN: binding, zinc ion binding; INVOLVED IN: biological_process unknown; LOCATED IN: intracellular; CONTAINS InterPro DOMAIN/s: Zinc finger, RanBP2-type (InterPro:IPR001876); BEST Arabidopsis thaliana protein match is: Ran BP2/NZF zinc finger-like superfamily protein (TAIR:AT3G15680.1); Has 972 Blast hits to 658 proteins in 133 species: A…	protein_coding			-1.70801	2.94764	-4.59207	4.5e-05	0.0151297	1.93211
AT5G44440	AT5G44440.1	FAD-binding Berberine family protein; FUNCTIONS IN: electron carrier activity, oxidoreductase activity, FAD binding, catalytic activity; LOCATED IN: endomembrane system; EXPRESSED IN: petal, embryo, sepal, pedicel, flower; EXPRESSED DURING: 4 anthesis, C globular stage, petal differentiation and expansion stage; CONTAINS InterPro DOMAIN/s: FAD-binding, type 2 (InterPro:IPR016166), Berberine/berbe…	protein_coding			-1.72062	3.27934	-5.20663	6.53e-06	0.00403125	3.7264
AT3G15670	AT3G15670.1	Late embryogenesis abundant protein (LEA) family protein; FUNCTIONS IN: molecular_function unknown; INVOLVED IN: embryo development ending in seed dormancy; LOCATED IN: nucleus; EXPRESSED DURING: dry seed stage; BEST Arabidopsis thaliana protein match is: Late embryogenesis abundant protein (LEA) family protein (TAIR:AT1G52690.2); Has 12897 Blast hits to 6829 proteins in 1482 species: Archae - 30…	protein_coding			-1.7268	-0.656076	-3.92902	0.000338757	0.0396357	0.0667663
AT4G05180	AT4G05180.1	Encodes the PsbQ subunit of the oxygen evolving complex of photosystem II.	protein_coding	PHOTOSYSTEM II SUBUNIT Q-2 (PSBQ-2)	(PSII-Q);PHOTOSYSTEM II SUBUNIT Q (PSBQ);PHOTOSYSTEM II SUBUNIT Q-2 (PSBQ-2)	-1.73871	8.09871	-4.59365	4.48e-05	0.0151297	1.8434
AT5G46960	AT5G46960.1	Plant invertase/pectin methylesterase inhibitor superfamily protein; FUNCTIONS IN: enzyme inhibitor activity, pectinesterase inhibitor activity, pectinesterase activity; INVOLVED IN: biological_process unknown; LOCATED IN: endomembrane system; EXPRESSED IN: cultured cell; CONTAINS InterPro DOMAIN/s: Pectinesterase inhibitor (InterPro:IPR006501); BEST Arabidopsis thaliana protein match is: Plant i…	protein_coding			-1.74784	-1.82512	-4.48543	6.26e-05	0.0175035	1.65133
AT2G34420	AT2G34420.1	Photosystem II type I chlorophyll a/b-binding protein	protein_coding	PHOTOSYSTEM II LIGHT HARVESTING COMPLEX GENE B1B2 (LHB1B2)	PHOTOSYSTEM II LIGHT HARVESTING COMPLEX GENE B1B2 (LHB1B2);PHOTOSYSTEM II LIGHT HARVESTING COMPLEX GENE 1.5 (LHCB1.5)	-1.76853	10.1301	-4.11827	0.000192204	0.0294578	0.503183
AT1G24510	AT1G24510.1	TCP-1/cpn60 chaperonin family protein; FUNCTIONS IN: protein binding; INVOLVED IN: protein folding, cellular protein metabolic process; LOCATED IN: plasma membrane; EXPRESSED IN: 23 plant structures; EXPRESSED DURING: 14 growth stages; CONTAINS InterPro DOMAIN/s: Chaperone, tailless complex polypeptide 1 (InterPro:IPR017998), Chaperonin Cpn60/TCP-1 (InterPro:IPR002423), T-complex protein 1, epsil…	protein_coding			-1.77016	1.57637	-5.69659	1.37e-06	0.00156899	5.24282
AT4G12510	AT4G12510.1	Bifunctional inhibitor/lipid-transfer protein/seed storage 2S albumin superfamily protein; FUNCTIONS IN: lipid binding; INVOLVED IN: lipid transport; LOCATED IN: endomembrane system; CONTAINS InterPro DOMAIN/s: Bifunctional inhibitor/plant lipid transfer protein/seed storage (InterPro:IPR016140), Plant lipid transfer protein/seed storage/trypsin-alpha amylase inhibitor (InterPro:IPR003612), Plant…	protein_coding			-1.80049	0.793262	-4.30531	0.00010892	0.0226434	1.06294
AT2G25890	AT2G25890.1	Oleosin family protein; FUNCTIONS IN: molecular_function unknown; INVOLVED IN: lipid storage; LOCATED IN: monolayer-surrounded lipid storage body, integral to membrane, membrane; EXPRESSED IN: petal, leaf whorl, flower, carpel; EXPRESSED DURING: 4 anthesis, petal differentiation and expansion stage; CONTAINS InterPro DOMAIN/s: Oleosin (InterPro:IPR000136); BEST Arabidopsis thaliana protein match …	protein_coding			-1.81276	-1.94154	-4.45974	6.78e-05	0.0175754	1.63534
AT2G40250	AT2G40250.1	SGNH hydrolase-type esterase superfamily protein; FUNCTIONS IN: hydrolase activity, acting on ester bonds, carboxylesterase activity; INVOLVED IN: lipid metabolic process; LOCATED IN: endomembrane system; EXPRESSED IN: sperm cell, sepal, pedicel; EXPRESSED DURING: 4 anthesis, petal differentiation and expansion stage; CONTAINS InterPro DOMAIN/s: Lipase, GDSL (InterPro:IPR001087), Esterase, SGNH h…	protein_coding			-1.84935	-1.93114	-3.92814	0.000339637	0.0396357	0.0300734
AT4G00210	AT4G00210.1	LOB domain-containing protein 31 (LBD31); CONTAINS InterPro DOMAIN/s: Lateral organ boundaries, LOB (InterPro:IPR004883); BEST Arabidopsis thaliana protein match is: LOB domain-containing protein 19 (TAIR:AT2G45410.1); Has 416 Blast hits to 414 proteins in 13 species: Archae - 0; Bacteria - 0; Metazoa - 0; Fungi - 0; Plants - 416; Viruses - 0; Other Eukaryotes - 0 (source: NCBI BLink).	protein_coding	LOB DOMAIN-CONTAINING PROTEIN 31 (LBD31)	LOB DOMAIN-CONTAINING PROTEIN 31 (LBD31)	-1.89218	-1.38485	-3.80185	0.000493266	0.0475096	-0.2247
AT1G60450	AT1G60450.1	Predicted to encode a galactinol synthase.	protein_coding	GALACTINOL SYNTHASE 7 (GolS7)	GALACTINOL SYNTHASE 7 (GolS7);GALACTINOL SYNTHASE 7 (AtGolS7)	-1.93362	-1.16188	-4.55141	5.11e-05	0.0160052	1.77
AT4G37410	AT4G37410.1	member of CYP81F	protein_coding	"CYTOCHROME P450, FAMILY 81, SUBFAMILY F, POLYPEPTIDE 4" (CYP81F4)	"CYTOCHROME P450, FAMILY 81, SUBFAMILY F, POLYPEPTIDE 4" (CYP81F4)	-1.94429	1.12033	-3.92427	0.000343563	0.0396357	0.108341
AT3G56080	AT3G56080.1	S-adenosyl-L-methionine-dependent methyltransferases superfamily protein; INVOLVED IN: biological_process unknown; LOCATED IN: endomembrane system; EXPRESSED IN: 17 plant structures; EXPRESSED DURING: 9 growth stages; CONTAINS InterPro DOMAIN/s: Protein of unknown function DUF248, methyltransferase putative (InterPro:IPR004159); BEST Arabidopsis thaliana protein match is: S-adenosyl-L-methionine-…	protein_coding			-1.95198	1.70847	-4.10569	0.000199632	0.0303745	0.662455
AT1G01390	AT1G01390.1	UDP-Glycosyltransferase superfamily protein; FUNCTIONS IN: UDP-glycosyltransferase activity, transferase activity, transferring glycosyl groups; INVOLVED IN: metabolic process; EXPRESSED IN: 7 plant structures; EXPRESSED DURING: 9 growth stages; CONTAINS InterPro DOMAIN/s: UDP-glucuronosyl/UDP-glucosyltransferase (InterPro:IPR002213); BEST Arabidopsis thaliana protein match is: UDP-glucosyl trans…	protein_coding			-1.95709	2.12634	-4.58342	4.62e-05	0.0151722	1.89027
AT1G35250	AT1G35250.1	Thioesterase superfamily protein; CONTAINS InterPro DOMAIN/s: Thioesterase superfamily (InterPro:IPR006683); BEST Arabidopsis thaliana protein match is: Thioesterase superfamily protein (TAIR:AT1G35290.1); Has 1470 Blast hits to 1469 proteins in 508 species: Archae - 4; Bacteria - 1027; Metazoa - 0; Fungi - 0; Plants - 80; Viruses - 0; Other Eukaryotes - 359 (source: NCBI BLink).	protein_coding			-1.96725	-1.28749	-3.76745	0.000545639	0.0497316	-0.374552
AT4G22460	AT4G22460.1	Bifunctional inhibitor/lipid-transfer protein/seed storage 2S albumin superfamily protein; FUNCTIONS IN: lipid binding; INVOLVED IN: lipid transport; LOCATED IN: endomembrane system; EXPRESSED IN: root; CONTAINS InterPro DOMAIN/s: Bifunctional inhibitor/plant lipid transfer protein/seed storage (InterPro:IPR016140), Plant lipid transfer protein/seed storage/trypsin-alpha amylase inhibitor (InterP…	protein_coding			-2.00826	-0.332743	-4.15638	0.000171304	0.0286235	0.800582
AT2G36792	AT2G36792.1	Potential natural antisense gene, locus overlaps with AT2G36790	other_rna			-2.01373	2.27156	-3.80536	0.000488204	0.0472388	-0.14799
AT1G03120	AT1G03120.1	Atrab28 plays a role in the ion cell balance during late embryogenesis and germination.	protein_coding	RESPONSIVE TO ABSCISIC ACID 28 (RAB28)	RESPONSIVE TO ABSCISIC ACID 28 (ATRAB28);RESPONSIVE TO ABSCISIC ACID 28 (RAB28)	-2.04116	-0.983439	-4.19377	0.00015296	0.0267643	0.650009
AT1G11450	AT1G11450.2	nodulin MtN21-like transporter family protein	protein_coding			-2.07725	0.695945	-3.96871	0.000301001	0.0378388	0.216997
AT1G61270	AT1G61270.1	Transmembrane amino acid transporter family protein; CONTAINS InterPro DOMAIN/s: Amino acid transporter, transmembrane (InterPro:IPR013057); BEST Arabidopsis thaliana protein match is: Transmembrane amino acid transporter family protein (TAIR:AT3G01760.1); Has 4440 Blast hits to 4407 proteins in 395 species: Archae - 7; Bacteria - 281; Metazoa - 1351; Fungi - 614; Plants - 1606; Viruses - 3; Othe…	protein_coding			-2.14077	-1.93465	-3.82687	0.000458279	0.0460406	-0.307019
AT5G10770	AT5G10770.1	Eukaryotic aspartyl protease family protein; FUNCTIONS IN: DNA binding, aspartic-type endopeptidase activity; INVOLVED IN: proteolysis; EXPRESSED IN: 12 plant structures; EXPRESSED DURING: 4 anthesis, C globular stage, petal differentiation and expansion stage, E expanded cotyledon stage; CONTAINS InterPro DOMAIN/s: Peptidase aspartic (InterPro:IPR021109), Peptidase aspartic, catalytic (InterPro:…	protein_coding			-2.14115	5.0302	-6.05825	4.31e-07	0.000566089	6.32495
AT5G44580	AT5G44580.1	unknown protein; FUNCTIONS IN: molecular_function unknown; INVOLVED IN: biological_process unknown; LOCATED IN: endomembrane system; EXPRESSED IN: 18 plant structures; EXPRESSED DURING: 12 growth stages; BEST Arabidopsis thaliana protein match is: unknown protein (TAIR:AT5G44582.1); Has 30201 Blast hits to 17322 proteins in 780 species: Archae - 12; Bacteria - 1396; Metazoa - 17338; Fungi - 3422;…	protein_coding			-2.21312	3.65382	-4.3773	8.74e-05	0.0199407	1.41392
AT3G59010	AT3G59010.1	pectin methylesterase 61 (PME61); FUNCTIONS IN: enzyme inhibitor activity, pectinesterase activity; INVOLVED IN: cell wall modification; LOCATED IN: cell wall, plant-type cell wall; EXPRESSED IN: 19 plant structures; EXPRESSED DURING: 13 growth stages; CONTAINS InterPro DOMAIN/s: Pectinesterase, active site (InterPro:IPR018040), Pectin lyase fold/virulence factor (InterPro:IPR011050), Pectinester…	protein_coding	PECTIN METHYLESTERASE 61 (PME61)	PECTIN METHYLESTERASE 61 (PME61);PECTIN METHYLESTERASE 35 (PME35)	-2.24899	3.63307	-4.3816	8.62e-05	0.0199304	1.37589
AT2G32610	AT2G32610.1	encodes a gene similar to cellulose synthase	protein_coding	CELLULOSE SYNTHASE-LIKE B1 (CSLB01)	CELLULOSE SYNTHASE-LIKE B1 (CSLB01);CELLULOSE SYNTHASE LIKE B1 (ATCSLB1);CELLULOSE SYNTHASE-LIKE B1 (ATCSLB01);CELLULOSE SYNTHASE LIKE B1 (CSLB01)	-2.2552	-1.71142	-3.87322	0.000399687	0.0430371	-0.130263
AT1G68725	AT1G68725.1	AGP19 is a lysine-rich arabinogalactan-protein (AGP) and part of a multi-gene family of glycoproteins with approx. 50 members. It falls into one subclass with AGP17 and AGP18, other lysine-rich AGPs. It is expressed in young leaves, shoots, roots and flowers. Non-consensus splice site at the intron:exon boundary (AT:exon)	protein_coding	ARABINOGALACTAN PROTEIN 19 (AGP19)	ARABINOGALACTAN PROTEIN 19 (AGP19);ARABINOGALACTAN PROTEIN 19 (ATAGP19)	-2.32035	0.454339	-4.48788	6.22e-05	0.0175035	1.68472
AT4G36600	AT4G36600.1	Late embryogenesis abundant (LEA) protein; CONTAINS InterPro DOMAIN/s: Late embryogenesis abundant protein, group 4 (InterPro:IPR004238); BEST Arabidopsis thaliana protein match is: late embryogenesis abundant domain-containing protein / LEA domain-containing protein (TAIR:AT2G18340.1); Has 1483 Blast hits to 893 proteins in 345 species: Archae - 4; Bacteria - 836; Metazoa - 93; Fungi - 47; Plant…	protein_coding			-2.38342	-1.98118	-3.94971	0.00031854	0.0386611	0.184552
AT1G65310	AT1G65310.1	Encodes a xyloglucan endotransglucosylase/hydrolase with only only the endotransglucosylase (XET; EC 2.4.1.207) activity towards xyloglucan and non-detectable endohydrolytic (XEH; EC 3.2.1.151) activity. Expressed in the mature or basal regions of both the main and lateral roots, but not in the tip of these roots where cell division occurs.	protein_coding	XYLOGLUCAN ENDOTRANSGLUCOSYLASE/HYDROLASE 17 (XTH17)	XYLOGLUCAN ENDOTRANSGLUCOSYLASE/HYDROLASE 17 (ATXTH17);XYLOGLUCAN ENDOTRANSGLUCOSYLASE/HYDROLASE 17 (XTH17)	-2.3858	2.95905	-5.88865	7.42e-07	0.000916353	5.80009
AT3G02480	AT3G02480.1	Late embryogenesis abundant protein (LEA) family protein; BEST Arabidopsis thaliana protein match is: Late embryogenesis abundant protein (LEA) family protein (TAIR:AT5G38760.1); Has 213 Blast hits to 189 proteins in 38 species: Archae - 0; Bacteria - 0; Metazoa - 9; Fungi - 12; Plants - 190; Viruses - 0; Other Eukaryotes - 2 (source: NCBI BLink).	protein_coding			-2.40209	-0.364038	-5.1691	7.35e-06	0.00428846	3.69029
AT3G20210	AT3G20210.1	Encodes a vacuolar processing enzyme with caspase-1-like activity that is specifically expressed in inner integument of developing seeds. Mutants display abnormal seed coat development. It is speculated to be involved in cell death of limited cell layers, the purpose of which is to form a seed coat.	protein_coding	DELTA VACUOLAR PROCESSING ENZYME (DELTA-VPE)	DELTA VACUOLAR PROCESSING ENZYME (DELTA-VPE);DELTA VACUOLAR PROCESSING ENZYME (DELTAVPE)	-2.40788	-1.67873	-4.35296	9.41e-05	0.0210288	1.34121
AT2G29130	AT2G29130.1	putative laccase, knockout mutant had reduced root elongation under PEG-induced dehydration	protein_coding	LACCASE 2 (LAC2)	LACCASE 2 (LAC2); (ATLAC2)	-2.49459	1.8038	-5.60759	1.82e-06	0.00191212	4.90102
AT1G29930	AT1G29930.1	Subunit of light-harvesting complex II (LHCII),which absorbs light and transfers energy to the photosynthetic reaction center.	protein_coding	CHLOROPHYLL A/B BINDING PROTEIN 1 (CAB1)	CELLULOSE SYNTHASE LIKE C8 (CLSC8);LIGHT-HARVESTING CHLOROPHYLL A/B-PROTEIN 1.3 (LHCB1.3);CHLOROPHYLL A/B BINDING PROTEIN 1 (CAB1); (AB140);CHLOROPHYLL A/B PROTEIN 140 (CAB140)	-2.53985	1.00456	-5.35289	6.1e-06	0.0039237	3.73185
AT4G19810	AT4G19810.1	ChiC encodes a Class V chitinase that is a part of glycoside hydrolase family 18 based on CAZy groupings. It appears to primarily act as an exochitinase in vitro where it predominantly cleaves a chitobiose (GlcNAc)2 residue from the non-reducing end of a chitin oligosaccharide. However, it shows some minor endochitinase activity in vitro, as well. A putative 24 amino-acid signal peptide may direc…	protein_coding	CLASS V CHITINASE (ChiC)	CLASS V CHITINASE (ChiC)	-2.54488	2.03554	-3.86674	0.000407418	0.0431661	0.033859
AT2G05070	AT2G05070.1	Encodes Lhcb2.2. Belongs to the Lhc super-gene family encodes the light-harvesting chlorophyll a/b-binding (LHC) proteins that constitute the antenna system of the photosynthetic apparatus.	protein_coding	PHOTOSYSTEM II LIGHT HARVESTING COMPLEX GENE 2.2 (LHCB2.2)	PHOTOSYSTEM II LIGHT HARVESTING COMPLEX GENE 2.2 (LHCB2.2);LIGHT-HARVESTING CHLOROPHYLL B-BINDING 2 (LHCB2)	-2.5987	7.18799	-4.17888	0.000160024	0.0275412	0.639088
AT5G42500	AT5G42500.1	Disease resistance-responsive (dirigent-like protein) family protein; FUNCTIONS IN: molecular_function unknown; INVOLVED IN: defense response; LOCATED IN: endomembrane system; CONTAINS InterPro DOMAIN/s: Plant disease resistance response protein (InterPro:IPR004265); BEST Arabidopsis thaliana protein match is: Disease resistance-responsive (dirigent-like protein) family protein (TAIR:AT5G42510.1)…	protein_coding			-2.68526	-0.393762	-3.8804	0.000391288	0.0427137	0.044359
AT1G48130	AT1G48130.1	encodes a protein similar to the 1-cysteine (1-Cys) peroxiredoxin family of antioxidants. Expression is limited to seed (aleurone and embryo) and is not induced by ABA or drought.	protein_coding	1-CYSTEINE PEROXIREDOXIN 1 (PER1)	1-CYSTEINE PEROXIREDOXIN 1 (PER1);1-CYSTEINE PEROXIREDOXIN 1 (ATPER1)	-2.70839	-1.44456	-4.95494	1.45e-05	0.00674998	3.06214
AT5G13630	AT5G13630.1	Encodes magnesium chelatase involved in plastid-to-nucleus signal transduction.	protein_coding	GENOMES UNCOUPLED 5 (GUN5)	ABA-BINDING PROTEIN (ABAR);H SUBUNIT OF MG-CHELATASE (CHLH);CONDITIONAL CHLORINA (CCH);GENOMES UNCOUPLED 5 (GUN5); (CCH1)	-2.72048	1.7837	-5.32571	4.47e-06	0.0033295	3.93254
AT3G25830	AT3G25830.1	Encodes the monoterpene 1,8-cineole synthase, atTPS-Cin. This polypeptide was also shown to synthesize other monoterpenes albeit in minor quantities. The same polypeptide is encoded at two different loci, the result of gene duplication: at3g25820 and at3g25830.	protein_coding	"TERPENE SYNTHASE-LIKE SEQUENCE-1,8-CINEOLE" (TPS-CIN)	"TERPENE SYNTHASE-LIKE SEQUENCE-1,8-CINEOLE" (TPS-CIN);TERPENE SYNTHASE-LIKE SEQUENCE-1,8-CINEOLE (ATTPS-CIN);TERPENE SYNTHASE-LIKE SEQUENCE-1,8-CINEOLE (TPS-CIN)	-2.75869	-2.28866	-3.86152	0.000413748	0.0434373	-0.270778
AT3G30720	AT3G30720.1	QUA-QUINE STARCH (QQS); Has 1 Blast hits to 1 proteins in 1 species: Archae - 0; Bacteria - 0; Metazoa - 0; Fungi - 0; Plants - 1; Viruses - 0; Other Eukaryotes - 0 (source: NCBI BLink).	protein_coding	QUA-QUINE STARCH (QQS)	QUA-QUINE STARCH (QQS)	-2.75947	3.9355	-6.35359	1.68e-07	0.00025184	7.25438
AT1G52690	AT1G52690.1	Late embryogenesis abundant protein (LEA) family protein; BEST Arabidopsis thaliana protein match is: Late embryogenesis abundant protein (LEA) family protein (TAIR:AT3G15670.1); Has 2929 Blast hits to 1441 proteins in 420 species: Archae - 10; Bacteria - 766; Metazoa - 298; Fungi - 136; Plants - 1347; Viruses - 16; Other Eukaryotes - 356 (source: NCBI BLink).	protein_coding	LATE EMBRYOGENESIS ABUNDANT 7 (LEA7)	LATE EMBRYOGENESIS ABUNDANT 7 (LEA7)	-2.795	0.228334	-5.50552	2.52e-06	0.00243871	4.69116
AT5G21100	AT5G21100.1	Plant L-ascorbate oxidase; FUNCTIONS IN: oxidoreductase activity, copper ion binding, L-ascorbate oxidase activity; INVOLVED IN: oxidation reduction; LOCATED IN: plant-type cell wall; EXPRESSED IN: 21 plant structures; EXPRESSED DURING: 13 growth stages; CONTAINS InterPro DOMAIN/s: Multicopper oxidase, type 3 (InterPro:IPR011707), Multicopper oxidase, type 2 (InterPro:IPR011706), Cupredoxin (Inte…	protein_coding			-2.82375	2.73925	-4.23395	0.000135387	0.0253258	1.01485
AT2G16970	AT2G16970.1	maternal effect embryo arrest 15 (MEE15); FUNCTIONS IN: tetracycline transporter activity; INVOLVED IN: embryo development ending in seed dormancy; LOCATED IN: integral to membrane; EXPRESSED IN: 22 plant structures; EXPRESSED DURING: 13 growth stages; CONTAINS InterPro DOMAIN/s: Tetracycline resistance protein, TetA (InterPro:IPR001958), Major facilitator superfamily MFS-1 (InterPro:IPR011701), …	protein_coding	MATERNAL EFFECT EMBRYO ARREST 15 (MEE15)	MATERNAL EFFECT EMBRYO ARREST 15 (MEE15)	-2.90315	-1.40794	-4.6586	3.66e-05	0.0134852	1.55945
AT3G21370	AT3G21370.1	beta glucosidase 19 (BGLU19); FUNCTIONS IN: cation binding, hydrolase activity, hydrolyzing O-glycosyl compounds, catalytic activity; INVOLVED IN: carbohydrate metabolic process; LOCATED IN: endomembrane system; EXPRESSED IN: seed; CONTAINS InterPro DOMAIN/s: Glycoside hydrolase, family 1 (InterPro:IPR001360), Glycoside hydrolase, family 1, active site (InterPro:IPR018120), Glycoside hydrolase, c…	protein_coding	BETA GLUCOSIDASE 19 (BGLU19)	BETA GLUCOSIDASE 19 (BGLU19)	-2.90967	-1.48655	-4.81866	2.22e-05	0.00991795	2.66656
AT3G27690	AT3G27690.1	Encodes Lhcb2.4. Belongs to the Lhc super-gene family encodes the light-harvesting chlorophyll a/b-binding (LHC) proteins that constitute the antenna system of the photosynthetic apparatus.	protein_coding	PHOTOSYSTEM II LIGHT HARVESTING COMPLEX GENE 2.3 (LHCB2.3)	LIGHT-HARVESTING CHLOROPHYLL B-BINDING 2 (LHCB2); (LHCB2.4);PHOTOSYSTEM II LIGHT HARVESTING COMPLEX GENE 2.3 (LHCB2.3)	-2.92129	6.58206	-3.83036	0.000453588	0.0457884	-0.323519
AT5G66690	AT5G66690.1	UGT72E2 is an UDPG:coniferyl alcohol glucosyltransferase which glucosylates sinapyl- and coniferyl aldehydes as well as sinapyl- and coniferyl alcohol. The enzyme is thought to be involved in lignin metabolism. A knockdown mutant line (72E2KD) was obtained using RNAi silencing. A twofold reduction in coniferyl alcohol 4-<i>O</i>-glucoside and sinapyl alcohol 4-<i>O</i>-glucoside was detected in t…	protein_coding	(UGT72E2)	(UGT72E2)	-2.93698	-0.0309733	-3.93514	0.000332648	0.0394611	0.190731
AT3G44570	AT3G44570.1	Arabidopsis retrotransposon ORF-1 protein; CONTAINS InterPro DOMAIN/s: Arabidopsis retrotransposon ORF-1 protein (InterPro:IPR004312); BEST Arabidopsis thaliana protein match is: Arabidopsis retrotransposon ORF-1 protein (TAIR:AT3G30820.1); Has 18 Blast hits to 18 proteins in 4 species: Archae - 0; Bacteria - 0; Metazoa - 0; Fungi - 0; Plants - 18; Viruses - 0; Other Eukaryotes - 0 (source: NCBI …	protein_coding			-3.02666	-1.82535	-3.78159	0.000523494	0.0488073	-0.399789
AT2G25160	AT2G25160.1	member of CYP82F	protein_coding	"CYTOCHROME P450, FAMILY 82, SUBFAMILY F, POLYPEPTIDE 1" (CYP82F1)	"CYTOCHROME P450, FAMILY 82, SUBFAMILY F, POLYPEPTIDE 1" (CYP82F1)	-3.10931	0.482645	-5.50148	2.56e-06	0.00243871	4.66916
AT1G67090	AT1G67090.1	Encodes a member of the Rubisco small subunit (RBCS) multigene family: RBCS1A (At1g67090), RBCS1B (At5g38430), RBCS2B (At5g38420), and RBCS3B (At5g38410). Functions to yield sufficient Rubisco content for leaf photosynthetic capacity.	protein_coding	RIBULOSE BISPHOSPHATE CARBOXYLASE SMALL CHAIN 1A (RBCS1A)	RIBULOSE BISPHOSPHATE CARBOXYLASE SMALL CHAIN 1A (RBCS1A)	-3.27765	4.24827	-5.1825	7.45e-06	0.004311	3.67223
AT5G46900	AT5G46900.1	Bifunctional inhibitor/lipid-transfer protein/seed storage 2S albumin superfamily protein; FUNCTIONS IN: lipid binding; INVOLVED IN: lipid transport; LOCATED IN: endomembrane system; CONTAINS InterPro DOMAIN/s: Bifunctional inhibitor/plant lipid transfer protein/seed storage (InterPro:IPR016140), Plant lipid transfer protein/seed storage/trypsin-alpha amylase inhibitor (InterPro:IPR003612), Plant…	protein_coding			-3.29291	1.75831	-3.96945	0.000300343	0.0378388	0.0528674
AT1G72290	AT1G72290.1	Kunitz family trypsin and protease inhibitor protein; FUNCTIONS IN: endopeptidase inhibitor activity; INVOLVED IN: biological_process unknown; LOCATED IN: endomembrane system; EXPRESSED IN: 7 plant structures; EXPRESSED DURING: 4 anthesis, C globular stage, petal differentiation and expansion stage; CONTAINS InterPro DOMAIN/s: Proteinase inhibitor I3, Kunitz legume (InterPro:IPR002160), Kunitz in…	protein_coding			-3.314	-2.68296	-4.55492	5.05e-05	0.0160052	1.53427
AT1G18140	AT1G18140.1	putative laccase, a member of laccase family of genes (with 17 members in Arabidopsis).	protein_coding	LACCASE 1 (LAC1)	(ATLAC1);LACCASE 1 (LAC1)	-3.38291	-0.260543	-3.99589	0.000277546	0.0366193	0.306292
AT1G43780	AT1G43780.1	serine carboxypeptidase-like 44 (scpl44); FUNCTIONS IN: serine-type carboxypeptidase activity; INVOLVED IN: proteolysis; LOCATED IN: endomembrane system; EXPRESSED IN: 10 plant structures; EXPRESSED DURING: 4 anthesis, F mature embryo stage, petal differentiation and expansion stage, E expanded cotyledon stage; CONTAINS InterPro DOMAIN/s: Peptidase S10, serine carboxypeptidase (InterPro:IPR001563…	protein_coding	SERINE CARBOXYPEPTIDASE-LIKE 44 (scpl44)	SERINE CARBOXYPEPTIDASE-LIKE 44 (scpl44)	-3.43956	-3.0735	-4.61316	4.22e-05	0.0147562	1.49236
AT2G16005	AT2G16005.1	MD-2-related lipid recognition domain-containing protein; FUNCTIONS IN: molecular_function unknown; INVOLVED IN: biological_process unknown; LOCATED IN: endomembrane system; EXPRESSED IN: root; CONTAINS InterPro DOMAIN/s: MD-2-related lipid-recognition (InterPro:IPR003172); BEST Arabidopsis thaliana protein match is: MD-2-related lipid recognition domain-containing protein (TAIR:AT3G44100.1); Has…	protein_coding			-3.72865	0.0194882	-4.53764	5.33e-05	0.0163818	1.85719
AT4G33790	AT4G33790.1	Encodes an alcohol-forming fatty acyl-CoA reductase, involved in cuticular wax biosynthesis. Lines carrying recessive mutations are deficient in primary alcohol and have glossy stem surfaces.	protein_coding	ECERIFERUM 4 (CER4)	FATTY ACID REDUCTASE 3 (FAR3); (G7);ECERIFERUM 4 (CER4)	-3.74357	-0.654883	-4.01719	0.00026042	0.0355068	0.124944
ATCG00210	ATCG00210.1	hypothetical protein	protein_coding	(YCF6)	(YCF6)	-3.79394	2.11072	-3.76833	0.000544237	0.0497316	-0.346464
ATCG01000	ATCG01000.1	hypothetical protein	protein_coding	(YCF1.1)	(YCF1.1)	-5.10348	0.685516	-3.85335	0.00042385	0.0436125	-0.00794114
AT5G04120	AT5G04120.1	Encodes a cofactor-dependent phosphoglycerate mutase (dPGM) - like protein with phosphoserine phosphatase activity that may be responsible for serine anabolism.	protein_coding			-5.38837	-0.240082	-4.71141	3.11e-05	0.0118539	2.15511
ATCG00290	ATCG00290.1	tRNA-Ser	pre_trna	(TRNS.2)	(TRNS.2)	-5.87678	3.75265	-3.88216	0.000389252	0.0427137	-0.16116
ATCG01300	ATCG01300.1	One of two chloroplast genes that encode chloroplast ribosomal protein L23, a constituent of the large subunit of the ribosomal complex	protein_coding	RIBOSOMAL PROTEIN L23 (RPL23.2)	RIBOSOMAL PROTEIN L23 (RPL23.2)	-6.05147	2.26182	-4.25131	0.00012842	0.0245131	1.00506
ATCG00300	ATCG00300.1	encodes PsbZ, which is a subunit of photosystem II. In Chlamydomonas, this protein has been shown to be essential in the interaction between PS II and the light harvesting complex II.	protein_coding	(YCF9)	(YCF9)	-6.79308	4.80203	-3.78632	0.000516286	0.0487493	-0.415094

## Sheet: 1-ES-ccr2-GO
			GO_acc	term_type	Term	queryitem	querytotal	bgitem	bgtotal	pvalue	FDR	entries
Analysis Brief Summary			GO:0015979	P	photosynthesis	17	191	435	28397	1.2e-08	3.8e-06	// AT1G29930 // AT4G05180 // AT5G66570 // AT2G20260 // AT3G08940 // AT2G05070 // AT3G27690 // ATCG00300 // AT5G58330 // AT1G06680 // AT1G67090 // AT3G61470 // ATCG00210 // AT1G32060 // AT4G02770 // AT2G34420 // AT5G13630
Species:	Arabidopsis		GO:0019684	P	photosynthesis, light reaction	14	191	333	28397	1e-07	1.6e-05	// AT1G29930 // AT3G08940 // AT5G66570 // AT2G20260 // AT2G05070 // AT3G27690 // ATCG00300 // AT5G58330 // AT1G06680 // AT3G61470 // AT1G32060 // AT4G02770 // AT2G34420 // AT5G13630
GO type:	Completed GO		GO:0009765	P	photosynthesis, light harvesting	6	191	41	28397	7e-07	7.6e-05	// AT1G29930 // AT2G05070 // AT3G27690 // AT3G61470 // AT3G08940 // AT2G34420
Background/Reference:	Customized		GO:0009628	P	response to abiotic stimulus	39	191	2635	28397	2.5e-06	0.0002	// AT3G02480 // AT5G11260 // AT4G15560 // AT3G52115 // AT5G35630 // AT5G48720 // AT2G22540 // AT1G06680 // AT2G39800 // AT5G02490 // AT5G03780 // AT3G28210 // AT2G29130 // AT5G66570 // AT1G67090 // AT4G02390 // AT5G17270 // AT2G32950 // AT2G20560 // AT1G55180 // AT4G19810 // AT1G09530 // AT3G46970 // AT2G30250 // AT4G21070 // AT3G27690 // AT4G26780 // AT1G32060 // AT5G25610 // AT5G52300 // AT4G10…
Annotated number Entered:	191		GO:0006091	P	generation of precursor metabolites and energy	18	191	730	28397	3.1e-06	0.0002	// AT1G29930 // AT5G13630 // ATCG00210 // AT5G66570 // AT2G20260 // AT1G53990 // AT5G35630 // AT3G08940 // AT2G05070 // ATCG00300 // AT5G58330 // AT1G06680 // AT3G27690 // AT3G61470 // AT1G32060 // AT4G02770 // AT2G34420 // AT3G07800
Annotated number in query list:	191		GO:0010212	P	response to ionizing radiation	7	191	93	28397	5e-06	0.00026	// AT4G21070 // AT3G52115 // AT4G02390 // AT5G48720 // AT5G40840 // AT5G03780 // AT1G13330
Annotated number in reference:	28397		GO:0009314	P	response to radiation	24	191	1263	28397	5.7e-06	0.00026	// AT5G11260 // AT4G15560 // AT3G52115 // AT5G35630 // AT5G48720 // AT1G06680 // AT5G02490 // AT5G03780 // AT5G66570 // AT1G67090 // AT4G02390 // AT5G17270 // AT2G32950 // AT2G20560 // AT1G09530 // AT4G21070 // AT3G27690 // AT1G32060 // AT4G10180 // AT3G08940 // AT4G37580 // AT5G40840 // AT1G04220 // AT1G13330
Significant GO terms:	147		GO:0010218	P	response to far red light	7	191	99	28397	7.4e-06	0.0003	// AT5G11260 // AT5G35630 // AT3G27690 // AT1G32060 // AT1G06680 // AT1G67090 // AT3G08940
			GO:0010114	P	response to red light	7	191	104	28397	1e-05	0.00036	// AT5G11260 // AT5G35630 // AT3G27690 // AT1G32060 // AT1G06680 // AT1G67090 // AT3G08940
			GO:0006302	P	double-strand break repair	7	191	110	28397	1.4e-05	0.00046	// AT4G21070 // AT3G52115 // AT4G02390 // AT5G48720 // AT5G40840 // AT5G03780 // AT1G13330
			GO:0010332	P	response to gamma radiation	6	191	75	28397	1.8e-05	0.00052	// AT4G21070 // AT4G02390 // AT5G48720 // AT5G40840 // AT5G03780 // AT1G13330
			GO:0010155	P	regulation of proton transport	6	191	77	28397	2e-05	0.00055	// AT4G15560 // AT5G35630 // AT3G27690 // AT2G35260 // AT1G06680 // AT3G08940
			GO:0009070	P	serine family amino acid biosynthetic process	9	191	222	28397	2.7e-05	0.00063	// AT4G02770 // AT4G15560 // AT1G35420 // AT5G35630 // AT1G32060 // AT1G06680 // AT5G66570 // AT3G08940 // AT5G04120
			GO:0009639	P	response to red or far red light	12	191	406	28397	2.7e-05	0.00063	// AT5G11260 // AT5G35630 // AT3G27690 // AT4G37580 // AT1G32060 // AT1G06680 // AT1G67090 // AT5G17270 // AT2G32950 // AT4G10180 // AT3G08940 // AT1G09530
			GO:0006812	P	cation transport	17	191	813	28397	4.6e-05	0.00099	// AT1G70890 // AT4G05180 // AT4G37410 // AT2G20260 // AT5G35630 // AT3G27690 // AT2G46750 // AT5G66690 // AT2G39450 // AT2G35260 // AT1G06680 // AT4G30170 // AT5G66570 // AT4G15560 // AT3G08940 // AT3G19390 // AT2G32610
			GO:0006281	P	DNA repair	10	191	307	28397	5.8e-05	0.0012	// AT4G21070 // AT3G52115 // AT4G02390 // AT5G48720 // AT3G27060 // AT5G40840 // AT2G32950 // AT4G10180 // AT5G03780 // AT1G13330
			GO:0043269	P	regulation of ion transport	7	191	147	28397	8.3e-05	0.0016	// AT5G66690 // AT4G15560 // AT5G35630 // AT3G27690 // AT2G35260 // AT1G06680 // AT3G08940
			GO:0019344	P	cysteine biosynthetic process	8	191	210	28397	0.00012	0.002	// AT4G02770 // AT4G15560 // AT1G35420 // AT5G35630 // AT1G32060 // AT1G06680 // AT5G66570 // AT3G08940
			GO:0009069	P	serine family amino acid metabolic process	9	191	271	28397	0.00012	0.002	// AT4G02770 // AT4G15560 // AT1G35420 // AT5G35630 // AT1G32060 // AT1G06680 // AT5G66570 // AT3G08940 // AT5G04120
			GO:0006534	P	cysteine metabolic process	8	191	213	28397	0.00013	0.002	// AT4G02770 // AT4G15560 // AT1G35420 // AT5G35630 // AT1G32060 // AT1G06680 // AT5G66570 // AT3G08940
			GO:0019748	P	secondary metabolic process	21	191	1247	28397	0.00012	0.002	// AT5G66690 // AT5G11260 // AT4G15560 // AT5G35630 // AT5G46780 // AT3G25830 // AT1G06820 // AT2G29130 // AT5G58330 // AT2G23040 // AT2G35260 // AT3G20210 // AT1G23550 // AT1G18140 // AT3G57010 // AT4G37410 // AT2G32950 // AT1G32060 // AT1G04220 // AT3G28210 // AT1G09530
			GO:0006974	P	response to DNA damage stimulus	10	191	352	28397	0.00017	0.0026	// AT4G21070 // AT3G52115 // AT4G02390 // AT5G48720 // AT3G27060 // AT5G40840 // AT2G32950 // AT4G10180 // AT5G03780 // AT1G13330
			GO:0051049	P	regulation of transport	7	191	172	28397	0.00021	0.003	// AT5G66690 // AT4G15560 // AT5G35630 // AT3G27690 // AT2G35260 // AT1G06680 // AT3G08940
			GO:0009637	P	response to blue light	6	191	126	28397	0.00027	0.0036	// AT5G35630 // AT3G27690 // AT1G32060 // AT1G06680 // AT1G67090 // AT3G08940
			GO:0008152	P	metabolic process	116	191	13633	28397	0.00029	0.0037	// AT1G29930 // AT5G11260 // AT4G05180 // AT4G15560 // AT1G35420 // AT1G65310 // AT1G06820 // AT5G48030 // AT3G07800 // AT2G29130 // AT4G34350 // AT2G32950 // AT1G60450 // AT5G13870 // AT4G26780 // AT3G17070 // AT5G39840 // AT3G57010 // AT1G10760 // AT4G37410 // AT2G20260 // AT3G27060 // AT4G30290 // AT1G04220 // AT5G23220 // AT3G10340 // AT2G22540 // AT2G40250 // AT5G35630 // AT5G58330 // AT1G06…
			GO:0006073	P	cellular glucan metabolic process	10	191	388	28397	0.00037	0.0046	// AT3G46970 // AT1G65310 // AT5G13870 // AT5G58330 // AT3G30720 // AT3G29320 // AT2G32610 // AT4G30290 // AT1G10760 // AT3G01510
			GO:0050896	P	response to stimulus	63	191	6292	28397	0.0004	0.0048	// AT3G02480 // AT5G11260 // AT4G15560 // AT3G52115 // AT5G35630 // AT5G48720 // AT2G39450 // AT2G22540 // AT1G06680 // AT2G39800 // AT1G70850 // AT1G31280 // AT5G02490 // AT3G53200 // AT5G03780 // AT3G28210 // AT4G23570 // AT1G64320 // AT2G29130 // AT3G08940 // AT5G66570 // AT1G67090 // AT5G46780 // AT1G03120 // AT4G02390 // AT4G34350 // AT5G42500 // AT1G70890 // AT3G62150 // AT5G17270 // AT2G32…
			GO:0033554	P	cellular response to stress	22	191	1473	28397	0.00044	0.0051	// AT2G22540 // AT3G52115 // AT4G02390 // AT5G48720 // AT1G06680 // AT5G02490 // AT5G03780 // AT3G28210 // AT5G66570 // AT5G46780 // AT2G32950 // AT2G20560 // AT1G55180 // AT4G30170 // AT2G30250 // AT4G21070 // AT3G27690 // AT1G32060 // AT4G10180 // AT3G27060 // AT5G40840 // AT1G13330
			GO:0051716	P	cellular response to stimulus	30	191	2355	28397	0.00057	0.0058	// AT5G11260 // AT3G52115 // AT4G02390 // AT5G48720 // AT2G22540 // AT1G06680 // AT3G20210 // AT5G02490 // AT5G03780 // AT3G28210 // AT4G23570 // AT2G28780 // AT5G66570 // AT5G46780 // AT3G62150 // AT2G32950 // AT4G30170 // AT1G55180 // AT1G09530 // AT2G30250 // AT4G21070 // AT3G27690 // AT1G32060 // AT5G52300 // AT4G10180 // AT2G20560 // AT4G37580 // AT3G27060 // AT5G40840 // AT1G13330
			GO:0032879	P	regulation of localization	7	191	207	28397	0.00062	0.0058	// AT5G66690 // AT4G15560 // AT5G35630 // AT3G27690 // AT2G35260 // AT1G06680 // AT3G08940
			GO:0006818	P	hydrogen transport	6	191	147	28397	0.00059	0.0058	// AT4G15560 // AT5G35630 // AT3G27690 // AT2G35260 // AT1G06680 // AT3G08940
			GO:0015992	P	proton transport	6	191	147	28397	0.00059	0.0058	// AT4G15560 // AT5G35630 // AT3G27690 // AT2G35260 // AT1G06680 // AT3G08940
			GO:0006811	P	ion transport	17	191	1019	28397	0.00062	0.0058	// AT1G70890 // AT4G05180 // AT4G37410 // AT2G20260 // AT5G35630 // AT3G27690 // AT2G46750 // AT5G66690 // AT2G39450 // AT2G35260 // AT1G06680 // AT4G30170 // AT5G66570 // AT4G15560 // AT3G08940 // AT3G19390 // AT2G32610
			GO:0006950	P	response to stress	45	191	4089	28397	0.00053	0.0058	// AT3G02480 // AT2G22540 // AT3G52115 // AT4G02390 // AT5G48720 // AT1G06680 // AT2G39800 // AT1G70850 // AT5G02490 // AT5G03780 // AT3G28210 // AT4G23570 // AT2G29130 // AT5G66570 // AT1G67090 // AT5G46780 // AT5G35630 // AT1G31280 // AT5G42500 // AT1G70890 // AT2G32950 // AT4G30170 // AT1G55180 // AT4G19810 // AT3G46970 // AT2G30250 // AT2G16740 // AT4G21070 // AT3G27690 // AT4G26780 // AT3G17…
			GO:0009414	P	response to water deprivation	10	191	416	28397	0.00062	0.0058	// AT3G46970 // AT3G02480 // AT2G29130 // AT3G27690 // AT5G25610 // AT3G29320 // AT2G39800 // AT1G48130 // AT5G52300 // AT3G28210
			GO:0009415	P	response to water	10	191	424	28397	0.00072	0.0063	// AT3G46970 // AT3G02480 // AT2G29130 // AT3G27690 // AT5G25610 // AT3G29320 // AT2G39800 // AT1G48130 // AT5G52300 // AT3G28210
			GO:0006519	P	cellular amino acid and derivative metabolic process	20	191	1324	28397	0.00071	0.0063	// AT3G10340 // AT4G02770 // AT5G11260 // AT1G55180 // AT4G15560 // AT1G35420 // AT5G35630 // AT5G46780 // AT5G66690 // AT2G29130 // AT5G04120 // AT1G32060 // AT1G06680 // AT2G39800 // AT2G32950 // AT1G18140 // AT5G66570 // AT3G08940 // AT1G04220 // AT1G09530
			GO:0009642	P	response to light intensity	8	191	282	28397	0.00078	0.0066	// AT5G66570 // AT5G35630 // AT3G27690 // AT1G06680 // AT2G32950 // AT2G20560 // AT5G02490 // AT3G08940
			GO:0044042	P	glucan metabolic process	10	191	432	28397	0.00083	0.0069	// AT3G46970 // AT1G65310 // AT5G13870 // AT5G58330 // AT3G30720 // AT3G29320 // AT2G32610 // AT4G30290 // AT1G10760 // AT3G01510
			GO:0044264	P	cellular polysaccharide metabolic process	12	191	601	28397	0.00091	0.0073	// AT3G10340 // AT1G65310 // AT5G13870 // AT3G46970 // AT5G58330 // AT3G30720 // AT4G22460 // AT3G29320 // AT2G32610 // AT4G30290 // AT1G10760 // AT3G01510
			GO:0009266	P	response to temperature stimulus	16	191	962	28397	0.00092	0.0073	// AT2G30250 // AT1G06680 // AT2G22540 // AT5G66570 // AT5G35630 // AT1G67090 // AT4G26780 // AT1G32060 // AT5G25610 // AT3G29320 // AT5G52300 // AT2G20560 // AT5G02490 // AT1G04220 // AT3G28210 // AT1G10760
			GO:0009644	P	response to high light intensity	7	191	224	28397	0.00096	0.0074	// AT5G66570 // AT5G35630 // AT3G27690 // AT1G06680 // AT2G20560 // AT5G02490 // AT3G08940
			GO:0012501	P	programmed cell death	10	191	451	28397	0.0011	0.0085	// AT2G30250 // AT2G22540 // AT5G66570 // AT5G46780 // AT3G27060 // AT1G32060 // AT1G06680 // AT3G20210 // AT5G48030 // AT3G28210
			GO:0048609	P	reproductive process in a multicellular organism	9	191	378	28397	0.0012	0.009	// AT3G52115 // AT2G25890 // AT3G15670 // AT5G40840 // AT5G17270 // AT1G48130 // AT3G20210 // AT1G79150 // AT5G48030
			GO:0005976	P	polysaccharide metabolic process	13	191	712	28397	0.0012	0.009	// AT3G10340 // AT1G65310 // AT5G13870 // AT3G46970 // AT5G58330 // AT3G30720 // AT4G22460 // AT3G29320 // AT2G32610 // AT4G30290 // AT4G19810 // AT1G10760 // AT3G01510
			GO:0000097	P	sulfur amino acid biosynthetic process	8	191	309	28397	0.0014	0.0097	// AT4G02770 // AT4G15560 // AT1G35420 // AT5G35630 // AT1G32060 // AT1G06680 // AT5G66570 // AT3G08940
			GO:0050801	P	ion homeostasis	7	191	240	28397	0.0014	0.0098	// AT4G05180 // AT5G66570 // AT2G20260 // AT4G39740 // AT1G03120 // AT2G39450 // AT1G70890
			GO:0042221	P	response to chemical stimulus	42	191	3978	28397	0.0019	0.012	// AT3G02480 // AT5G11260 // AT3G53200 // AT5G35630 // AT2G39450 // AT2G22540 // AT1G32060 // AT1G06680 // AT2G39800 // AT3G20210 // AT5G02490 // AT5G03780 // AT3G28210 // AT4G23570 // AT1G64320 // AT2G29130 // AT5G66570 // AT1G03120 // AT4G34350 // AT3G62150 // AT1G23550 // AT4G30170 // AT4G19810 // AT1G09530 // AT3G46970 // AT2G30250 // AT2G16740 // AT2G20560 // AT5G66690 // AT3G27690 // AT1G71…
			GO:0006364	P	rRNA processing	8	191	324	28397	0.0018	0.012	// AT4G02770 // AT5G66570 // AT3G27690 // AT1G32060 // AT1G06680 // AT5G58330 // AT3G08940 // AT1G24510
			GO:0016072	P	rRNA metabolic process	8	191	325	28397	0.0019	0.012	// AT4G02770 // AT5G66570 // AT3G27690 // AT1G32060 // AT1G06680 // AT5G58330 // AT3G08940 // AT1G24510
			GO:0044272	P	sulfur compound biosynthetic process	10	191	486	28397	0.0019	0.012	// AT4G02770 // AT3G08940 // AT4G15560 // AT1G35420 // AT5G35630 // AT1G32060 // AT1G06680 // AT2G35260 // AT5G66570 // AT5G58330
			GO:0055082	P	cellular chemical homeostasis	6	191	186	28397	0.0019	0.012	// AT4G05180 // AT5G66570 // AT2G20260 // AT1G03120 // AT2G39450 // AT1G70890
			GO:0032504	P	multicellular organism reproduction	9	191	405	28397	0.002	0.012	// AT3G52115 // AT2G25890 // AT3G15670 // AT5G40840 // AT5G17270 // AT1G48130 // AT3G20210 // AT1G79150 // AT5G48030
			GO:0006873	P	cellular ion homeostasis	6	191	185	28397	0.0018	0.012	// AT4G05180 // AT5G66570 // AT2G20260 // AT1G03120 // AT2G39450 // AT1G70890
			GO:0019252	P	starch biosynthetic process	6	191	191	28397	0.0022	0.013	// AT3G46970 // AT1G10760 // AT5G58330 // AT3G30720 // AT3G29320 // AT3G01510
			GO:0055114	P	oxidation reduction	19	191	1364	28397	0.0024	0.013	// AT2G25160 // AT2G29130 // AT4G33790 // AT4G37410 // AT1G18140 // AT5G44440 // AT2G46750 // AT3G27060 // AT1G06820 // AT4G34350 // AT3G17070 // AT1G06680 // AT3G13760 // AT1G48130 // AT4G30170 // AT5G66570 // AT5G58330 // AT5G21100 // AT1G32060
			GO:0016265	P	death	10	191	500	28397	0.0024	0.013	// AT2G30250 // AT2G22540 // AT5G66570 // AT5G46780 // AT3G27060 // AT1G32060 // AT1G06680 // AT3G20210 // AT5G48030 // AT3G28210
			GO:0008219	P	cell death	10	191	500	28397	0.0024	0.013	// AT2G30250 // AT2G22540 // AT5G66570 // AT5G46780 // AT3G27060 // AT1G32060 // AT1G06680 // AT3G20210 // AT5G48030 // AT3G28210
			GO:0008652	P	cellular amino acid biosynthetic process	10	191	503	28397	0.0025	0.014	// AT4G02770 // AT4G15560 // AT1G35420 // AT5G35630 // AT1G32060 // AT1G06680 // AT2G39800 // AT5G66570 // AT3G08940 // AT5G04120
			GO:0035304	P	regulation of protein amino acid dephosphorylation	5	191	135	28397	0.0025	0.014	// AT4G02770 // AT2G22540 // AT3G08940 // AT5G66570 // AT1G32060
			GO:0035303	P	regulation of dephosphorylation	5	191	137	28397	0.0027	0.014	// AT4G02770 // AT2G22540 // AT3G08940 // AT5G66570 // AT1G32060
			GO:0009416	P	response to light stimulus	17	191	1188	28397	0.0031	0.016	// AT5G11260 // AT4G15560 // AT5G35630 // AT3G27690 // AT4G37580 // AT1G32060 // AT1G06680 // AT1G67090 // AT5G17270 // AT2G32950 // AT4G10180 // AT2G20560 // AT5G66570 // AT5G02490 // AT3G08940 // AT1G04220 // AT1G09530
			GO:0048878	P	chemical homeostasis	7	191	281	28397	0.0033	0.017	// AT4G05180 // AT5G66570 // AT2G20260 // AT4G39740 // AT1G03120 // AT2G39450 // AT1G70890
			GO:0009309	P	amine biosynthetic process	10	191	527	28397	0.0034	0.017	// AT4G02770 // AT4G15560 // AT1G35420 // AT5G35630 // AT1G32060 // AT1G06680 // AT2G39800 // AT5G66570 // AT3G08940 // AT5G04120
			GO:0006470	P	protein amino acid dephosphorylation	6	191	214	28397	0.0037	0.019	// AT4G02770 // AT2G22540 // AT5G66570 // AT1G32060 // AT3G08940 // AT3G01510
			GO:0031399	P	regulation of protein modification process	5	191	150	28397	0.0039	0.019	// AT4G02770 // AT2G22540 // AT3G08940 // AT5G66570 // AT1G32060
			GO:0071495	P	cellular response to endogenous stimulus	13	191	815	28397	0.0039	0.019	// AT5G11260 // AT5G66570 // AT3G28210 // AT3G62150 // AT2G22540 // AT1G32060 // AT1G06680 // AT5G52300 // AT3G20210 // AT2G28780 // AT4G37580 // AT4G23570 // AT1G09530
			GO:0055080	P	cation homeostasis	6	191	217	28397	0.004	0.019	// AT4G05180 // AT5G66570 // AT2G20260 // AT4G39740 // AT2G39450 // AT1G70890
			GO:0009409	P	response to cold	11	191	629	28397	0.004	0.019	// AT2G30250 // AT1G06680 // AT5G66570 // AT5G35630 // AT1G67090 // AT1G32060 // AT5G25610 // AT3G29320 // AT5G52300 // AT1G04220 // AT1G10760
			GO:0006725	P	cellular aromatic compound metabolic process	15	191	1022	28397	0.0043	0.02	// AT3G10340 // AT5G66690 // AT5G11260 // AT4G37410 // AT5G46780 // AT2G29130 // AT1G32060 // AT1G06680 // AT2G32950 // AT1G18140 // AT5G02490 // AT4G15560 // AT5G66570 // AT1G04220 // AT1G09530
			GO:0051093	P	negative regulation of developmental process	5	191	154	28397	0.0044	0.02	// AT5G11260 // AT5G17270 // AT2G32950 // AT2G22540 // AT4G10180
			GO:0044281	P	small molecule metabolic process	41	191	4065	28397	0.0049	0.022	// AT3G10340 // AT4G02770 // AT5G11260 // AT4G33790 // AT4G15560 // AT1G35420 // AT5G35630 // AT5G48720 // AT3G53220 // AT5G58330 // AT1G06680 // AT2G39800 // AT3G20210 // AT5G02490 // AT3G07800 // AT2G29130 // AT5G66570 // AT5G46780 // AT4G34350 // AT5G17270 // AT2G32950 // AT1G55180 // AT5G21100 // AT5G48240 // AT1G09530 // AT1G53990 // AT5G60760 // AT2G46750 // AT4G26780 // AT1G32060 // AT5G39…
			GO:0005975	P	carbohydrate metabolic process	26	191	2249	28397	0.005	0.022	// AT3G10340 // AT1G65310 // AT4G15560 // AT5G35630 // AT5G58330 // AT3G30720 // AT3G62750 // AT3G01510 // AT3G21370 // AT4G34350 // AT1G60450 // AT3G03640 // AT4G19810 // AT4G22460 // AT3G46970 // AT5G13870 // AT1G53990 // AT1G32060 // AT5G60760 // AT1G10760 // AT4G37410 // AT2G39450 // AT2G35260 // AT3G29320 // AT4G30290 // AT2G32610
			GO:0034470	P	ncRNA processing	8	191	387	28397	0.0053	0.023	// AT4G02770 // AT5G66570 // AT3G27690 // AT1G32060 // AT1G06680 // AT5G58330 // AT3G08940 // AT1G24510
			GO:0005982	P	starch metabolic process	6	191	230	28397	0.0052	0.023	// AT3G46970 // AT1G10760 // AT5G58330 // AT3G30720 // AT3G29320 // AT3G01510
			GO:0009640	P	photomorphogenesis	6	191	233	28397	0.0055	0.024	// AT5G11260 // AT4G37580 // AT5G17270 // AT2G32950 // AT4G10180 // AT1G09530
			GO:0009250	P	glucan biosynthetic process	7	191	313	28397	0.0059	0.025	// AT3G46970 // AT1G10760 // AT5G58330 // AT3G30720 // AT3G29320 // AT2G32610 // AT3G01510
			GO:0010033	P	response to organic substance	30	191	2754	28397	0.006	0.025	// AT5G11260 // AT3G53200 // AT5G35630 // AT2G22540 // AT1G06680 // AT2G39800 // AT3G20210 // AT5G02490 // AT5G03780 // AT3G28210 // AT4G23570 // AT2G28780 // AT5G66570 // AT3G62150 // AT1G23550 // AT4G19810 // AT1G09530 // AT2G30250 // AT2G16740 // AT5G66690 // AT3G27690 // AT1G71960 // AT1G32060 // AT5G25610 // AT5G52300 // AT3G08940 // AT1G10760 // AT4G37580 // AT1G48130 // AT1G09540
			GO:0048583	P	regulation of response to stimulus	11	191	667	28397	0.0061	0.025	// AT2G30250 // AT5G11260 // AT5G66570 // AT5G46780 // AT2G22540 // AT1G32060 // AT1G06680 // AT5G44580 // AT2G32950 // AT4G10180 // AT3G28210
			GO:0030001	P	metal ion transport	10	191	576	28397	0.0063	0.025	// AT5G66690 // AT4G05180 // AT4G37410 // AT2G20260 // AT2G46750 // AT1G70890 // AT4G30170 // AT5G66570 // AT3G19390 // AT2G32610
			GO:0009698	P	phenylpropanoid metabolic process	8	191	405	28397	0.0068	0.027	// AT5G66690 // AT5G11260 // AT1G18140 // AT5G46780 // AT2G29130 // AT2G32950 // AT1G04220 // AT1G09530
			GO:0016311	P	dephosphorylation	6	191	245	28397	0.007	0.027	// AT4G02770 // AT2G22540 // AT5G66570 // AT1G32060 // AT3G08940 // AT3G01510
			GO:0000041	P	transition metal ion transport	6	191	243	28397	0.0067	0.027	// AT5G66690 // AT4G37410 // AT2G46750 // AT4G30170 // AT3G19390 // AT2G32610
			GO:0015672	P	monovalent inorganic cation transport	6	191	245	28397	0.007	0.027	// AT4G15560 // AT5G35630 // AT3G27690 // AT2G35260 // AT1G06680 // AT3G08940
			GO:0030003	P	cellular cation homeostasis	5	191	172	28397	0.0069	0.027	// AT1G70890 // AT2G39450 // AT4G05180 // AT5G66570 // AT2G20260
			GO:0006790	P	sulfur metabolic process	11	191	683	28397	0.0072	0.027	// AT4G02770 // AT3G08940 // AT4G37410 // AT1G35420 // AT5G35630 // AT5G58330 // AT1G06680 // AT2G35260 // AT5G66570 // AT4G15560 // AT1G32060
			GO:0019725	P	cellular homeostasis	7	191	328	28397	0.0075	0.028	// AT4G05180 // AT5G66570 // AT2G20260 // AT1G03120 // AT2G39450 // AT3G53220 // AT1G70890
			GO:0010207	P	photosystem II assembly	5	191	177	28397	0.0077	0.028	// AT1G06680 // AT4G02770 // AT1G32060 // AT5G66570 // AT5G58330
			GO:0016053	P	organic acid biosynthetic process	15	191	1116	28397	0.0092	0.032	// AT4G02770 // AT4G33790 // AT4G15560 // AT1G35420 // AT5G35630 // AT2G46750 // AT1G32060 // AT1G06680 // AT2G39800 // AT3G20210 // AT5G66570 // AT5G02490 // AT3G08940 // AT1G04220 // AT5G04120
			GO:0044262	P	cellular carbohydrate metabolic process	21	191	1778	28397	0.0092	0.032	// AT3G10340 // AT1G65310 // AT4G15560 // AT1G53990 // AT5G13870 // AT1G32060 // AT5G35630 // AT3G46970 // AT4G34350 // AT5G58330 // AT3G30720 // AT4G22460 // AT3G29320 // AT2G35260 // AT5G60760 // AT2G32610 // AT4G37410 // AT4G30290 // AT2G39450 // AT1G10760 // AT3G01510
			GO:0044271	P	cellular nitrogen compound biosynthetic process	12	191	804	28397	0.009	0.032	// AT5G13630 // AT4G15560 // AT1G35420 // AT5G35630 // AT1G32060 // AT1G06680 // AT2G39800 // AT5G66570 // AT3G57010 // AT3G08940 // AT4G02770 // AT5G04120
			GO:0046394	P	carboxylic acid biosynthetic process	15	191	1116	28397	0.0092	0.032	// AT4G02770 // AT4G33790 // AT4G15560 // AT1G35420 // AT5G35630 // AT2G46750 // AT1G32060 // AT1G06680 // AT2G39800 // AT3G20210 // AT5G66570 // AT5G02490 // AT3G08940 // AT1G04220 // AT5G04120
			GO:0032502	P	developmental process	40	191	4094	28397	0.0093	0.033	// AT5G64060 // AT5G11260 // AT3G15670 // AT4G15560 // AT1G35420 // AT5G35630 // AT5G48720 // AT2G22540 // AT2G39800 // AT5G43500 // AT3G20210 // AT5G48030 // AT4G23570 // AT1G64320 // AT5G66570 // AT1G09540 // AT1G03120 // AT5G17270 // AT2G32950 // AT1G55180 // AT2G16970 // AT1G09530 // AT3G02480 // AT2G16740 // AT1G79150 // AT3G61700 // AT2G25890 // AT1G52690 // AT1G32060 // AT5G52300 // AT4G10…
			GO:0031325	P	positive regulation of cellular metabolic process	10	191	615	28397	0.0096	0.033	// AT5G11260 // AT4G15560 // AT5G48720 // AT5G40840 // AT2G22540 // AT5G17270 // AT2G32950 // AT5G46780 // AT5G66570 // AT1G09530
			GO:0033692	P	cellular polysaccharide biosynthetic process	9	191	523	28397	0.0098	0.034	// AT3G10340 // AT3G46970 // AT5G58330 // AT3G30720 // AT3G29320 // AT2G32610 // AT4G22460 // AT1G10760 // AT3G01510
			GO:0007276	P	gamete generation	5	191	189	28397	0.01	0.034	// AT5G48030 // AT5G17270 // AT5G40840 // AT3G52115 // AT1G79150
			GO:0048585	P	negative regulation of response to stimulus	7	191	349	28397	0.01	0.034	// AT2G30250 // AT2G22540 // AT5G66570 // AT1G32060 // AT1G06680 // AT2G32950 // AT4G10180
			GO:0009893	P	positive regulation of metabolic process	10	191	623	28397	0.01	0.034	// AT5G11260 // AT4G15560 // AT5G48720 // AT5G40840 // AT2G22540 // AT5G17270 // AT2G32950 // AT5G46780 // AT5G66570 // AT1G09530
			GO:0042254	P	ribosome biogenesis	8	191	437	28397	0.01	0.034	// AT4G02770 // AT5G66570 // AT3G27690 // AT1G32060 // AT1G06680 // AT5G58330 // AT3G08940 // AT1G24510
			GO:0007275	P	multicellular organismal development	38	191	3864	28397	0.01	0.034	// AT5G64060 // AT5G11260 // AT3G27060 // AT4G15560 // AT1G35420 // AT5G48720 // AT2G22540 // AT2G39800 // AT5G43500 // AT3G20210 // AT5G48030 // AT4G23570 // AT1G64320 // AT5G66570 // AT1G09540 // AT1G03120 // AT5G17270 // AT2G32950 // AT1G55180 // AT2G16970 // AT1G09530 // AT3G02480 // AT1G79150 // AT3G61700 // AT2G25890 // AT1G52690 // AT1G32060 // AT5G52300 // AT4G10180 // AT5G40840 // AT4G37…
			GO:0032501	P	multicellular organismal process	39	191	4020	28397	0.011	0.037	// AT5G64060 // AT5G11260 // AT3G27060 // AT4G15560 // AT1G35420 // AT5G48720 // AT2G22540 // AT2G39800 // AT5G43500 // AT3G20210 // AT5G48030 // AT4G23570 // AT1G64320 // AT5G66570 // AT1G09540 // AT1G03120 // AT5G17270 // AT2G32950 // AT1G55180 // AT2G16970 // AT1G09530 // AT3G02480 // AT1G79150 // AT3G61700 // AT2G25890 // AT1G52690 // AT1G32060 // AT5G52300 // AT4G10180 // AT5G40840 // AT4G37…
			GO:0022613	P	ribonucleoprotein complex biogenesis	8	191	447	28397	0.012	0.037	// AT4G02770 // AT5G66570 // AT3G27690 // AT1G32060 // AT1G06680 // AT5G58330 // AT3G08940 // AT1G24510
			GO:0034637	P	cellular carbohydrate biosynthetic process	13	191	941	28397	0.012	0.038	// AT3G10340 // AT3G46970 // AT1G53990 // AT2G39450 // AT5G60760 // AT5G58330 // AT3G30720 // AT3G29320 // AT2G35260 // AT2G32610 // AT4G22460 // AT1G10760 // AT3G01510
			GO:0009791	P	post-embryonic development	24	191	2188	28397	0.013	0.04	// AT5G11260 // AT1G35420 // AT2G22540 // AT5G43500 // AT3G20210 // AT4G23570 // AT1G03120 // AT5G17270 // AT2G32950 // AT1G55180 // AT2G16970 // AT1G09530 // AT4G36600 // AT3G61700 // AT2G25890 // AT1G52690 // AT1G32060 // AT4G10180 // AT4G37580 // AT3G15670 // AT5G66460 // AT4G20090 // AT1G48130 // AT1G09540
			GO:0009719	P	response to endogenous stimulus	19	191	1615	28397	0.013	0.042	// AT1G06680 // AT5G11260 // AT5G66570 // AT3G28210 // AT3G62150 // AT1G71960 // AT2G22540 // AT1G32060 // AT5G25610 // AT2G39800 // AT1G48130 // AT3G20210 // AT1G09540 // AT2G28780 // AT5G52300 // AT4G19810 // AT4G37580 // AT4G23570 // AT1G09530
			GO:0010363	P	regulation of plant-type hypersensitive response	7	191	371	28397	0.014	0.043	// AT2G30250 // AT2G22540 // AT5G66570 // AT5G46780 // AT1G32060 // AT1G06680 // AT3G28210
			GO:0016051	P	carbohydrate biosynthetic process	14	191	1070	28397	0.014	0.044	// AT3G10340 // AT3G46970 // AT1G53990 // AT2G39450 // AT5G60760 // AT5G58330 // AT3G30720 // AT3G29320 // AT2G35260 // AT1G60450 // AT2G32610 // AT4G22460 // AT1G10760 // AT3G01510
			GO:0000096	P	sulfur amino acid metabolic process	8	191	465	28397	0.015	0.044	// AT4G02770 // AT4G15560 // AT1G35420 // AT5G35630 // AT1G32060 // AT1G06680 // AT5G66570 // AT3G08940
			GO:0006810	P	transport	35	191	3577	28397	0.015	0.044	// AT5G11260 // AT4G05180 // AT4G15560 // AT5G35630 // AT2G22540 // AT1G06680 // AT3G28210 // AT5G66570 // AT5G46780 // AT5G46900 // AT1G70890 // AT3G62150 // AT5G17270 // AT4G12510 // AT4G30170 // AT2G16970 // AT4G22460 // AT2G30250 // AT3G27690 // AT2G46750 // AT4G26780 // AT1G32060 // AT3G08940 // AT3G19390 // AT1G53470 // AT1G61270 // AT5G66690 // AT1G75670 // AT4G37410 // AT2G20260 // AT2G39…
			GO:0044283	P	small molecule biosynthetic process	21	191	1865	28397	0.015	0.044	// AT4G02770 // AT5G11260 // AT4G33790 // AT4G15560 // AT1G53990 // AT1G35420 // AT5G35630 // AT2G46750 // AT2G39450 // AT5G60760 // AT1G32060 // AT1G06680 // AT2G39800 // AT2G32950 // AT3G20210 // AT5G46780 // AT5G66570 // AT5G02490 // AT3G08940 // AT1G04220 // AT5G04120
			GO:0080135	P	regulation of cellular response to stress	7	191	379	28397	0.015	0.045	// AT2G30250 // AT2G22540 // AT5G66570 // AT5G46780 // AT1G32060 // AT1G06680 // AT3G28210
			GO:0034285	P	response to disaccharide stimulus	5	191	213	28397	0.016	0.046	// AT1G06680 // AT1G10760 // AT3G08940 // AT3G27690 // AT5G35630
			GO:0032268	P	regulation of cellular protein metabolic process	5	191	215	28397	0.016	0.047	// AT4G02770 // AT2G22540 // AT3G08940 // AT5G66570 // AT1G32060
			GO:0033036	P	macromolecule localization	18	191	1541	28397	0.017	0.049	// AT2G30250 // AT5G11260 // AT1G75670 // AT4G15560 // AT5G46780 // AT4G26780 // AT2G22540 // AT5G46900 // AT1G06680 // AT4G28950 // AT5G17270 // AT4G12510 // AT1G79150 // AT2G25890 // AT5G66570 // AT1G32060 // AT3G28210 // AT4G22460
			GO:0034660	P	ncRNA metabolic process	8	191	481	28397	0.017	0.049	// AT4G02770 // AT5G66570 // AT3G27690 // AT1G32060 // AT1G06680 // AT5G58330 // AT3G08940 // AT1G24510
			GO:0016168	F	chlorophyll binding	6	191	32	28397	1.9e-07	9.1e-06	// AT1G29930 // AT2G05070 // AT3G27690 // AT3G61470 // AT3G08940 // AT2G34420
			GO:0016757	F	transferase activity, transferring glycosyl groups	14	191	596	28397	6.7e-05	0.0016	// AT3G46970 // AT1G65310 // AT1G01390 // AT4G15490 // AT5G13870 // AT5G66690 // AT4G02390 // AT2G29740 // AT3G29320 // AT1G70440 // AT1G60450 // AT2G32610 // AT4G30290 // AT1G23550
			GO:0016758	F	transferase activity, transferring hexosyl groups	11	191	396	28397	0.0001	0.0016	// AT3G46970 // AT1G65310 // AT1G01390 // AT4G15490 // AT5G13870 // AT5G66690 // AT2G29740 // AT3G29320 // AT1G60450 // AT4G30290 // AT2G32610
			GO:0046906	F	tetrapyrrole binding	10	191	407	28397	0.00053	0.0051	// AT1G29930 // AT4G37410 // AT2G05070 // AT3G27690 // AT3G17070 // AT3G61470 // AT4G30170 // AT3G08940 // AT2G25160 // AT2G34420
			GO:0046527	F	glucosyltransferase activity	6	191	142	28397	0.00049	0.0051	// AT1G65310 // AT4G15490 // AT5G66690 // AT2G29740 // AT4G30290 // AT2G32610
			GO:0003824	F	catalytic activity	79	191	8787	28397	0.0015	0.012	// AT3G10340 // AT1G65310 // AT3G25830 // AT4G33790 // AT4G15560 // AT1G35420 // AT5G35630 // AT5G44440 // AT1G43780 // AT1G06820 // AT5G04120 // AT5G58330 // AT1G10760 // AT5G46960 // AT1G70440 // AT2G39800 // AT3G20210 // AT1G55180 // AT5G65530 // AT3G62750 // AT4G11320 // AT3G07800 // AT2G25160 // AT2G29130 // AT1G01390 // AT5G66570 // AT2G40250 // AT1G67090 // AT3G56080 // AT4G02390 // AT2G29…
			GO:0044436	C	thylakoid part	16	191	388	28397	1.6e-08	2.8e-07	// AT1G29930 // AT4G05180 // AT5G66570 // AT2G20260 // AT5G35630 // AT3G27690 // AT2G05070 // ATCG00300 // AT1G32060 // AT1G06680 // AT1G67090 // AT3G61470 // ATCG00210 // AT3G08940 // AT4G02770 // AT2G34420
			GO:0055035	C	plastid thylakoid membrane	15	191	324	28397	1e-08	2.8e-07	// AT1G29930 // AT4G05180 // AT5G66570 // AT2G20260 // AT5G35630 // AT3G27690 // AT2G05070 // ATCG00300 // AT1G32060 // AT1G06680 // AT1G67090 // AT3G61470 // AT3G08940 // AT4G02770 // AT2G34420
			GO:0042651	C	thylakoid membrane	15	191	341	28397	2e-08	2.8e-07	// AT1G29930 // AT4G05180 // AT5G66570 // AT2G20260 // AT5G35630 // AT3G27690 // AT2G05070 // ATCG00300 // AT1G32060 // AT1G06680 // AT1G67090 // AT3G61470 // AT3G08940 // AT4G02770 // AT2G34420
			GO:0009535	C	chloroplast thylakoid membrane	15	191	322	28397	9.5e-09	2.8e-07	// AT1G29930 // AT4G05180 // AT5G66570 // AT2G20260 // AT5G35630 // AT3G27690 // AT2G05070 // ATCG00300 // AT1G32060 // AT1G06680 // AT1G67090 // AT3G61470 // AT3G08940 // AT4G02770 // AT2G34420
			GO:0034357	C	photosynthetic membrane	15	191	355	28397	3.3e-08	3.7e-07	// AT1G29930 // AT4G05180 // AT5G66570 // AT2G20260 // AT5G35630 // AT3G27690 // AT2G05070 // ATCG00300 // AT1G32060 // AT1G06680 // AT1G67090 // AT3G61470 // AT3G08940 // AT4G02770 // AT2G34420
			GO:0009579	C	thylakoid	17	191	518	28397	1.3e-07	1.2e-06	// AT1G29930 // AT4G05180 // AT5G66570 // AT2G20260 // AT3G08940 // AT5G35630 // AT3G27690 // AT2G05070 // ATCG00300 // AT5G58330 // AT1G06680 // AT1G67090 // AT3G61470 // ATCG00210 // AT1G32060 // AT4G02770 // AT2G34420
			GO:0031976	C	plastid thylakoid	15	191	425	28397	3.1e-07	2.1e-06	// AT1G29930 // AT4G05180 // AT5G66570 // AT2G20260 // AT5G35630 // AT3G27690 // AT2G05070 // ATCG00300 // AT1G32060 // AT1G06680 // AT1G67090 // AT3G61470 // AT3G08940 // AT4G02770 // AT2G34420
			GO:0009534	C	chloroplast thylakoid	15	191	425	28397	3.1e-07	2.1e-06	// AT1G29930 // AT4G05180 // AT5G66570 // AT2G20260 // AT5G35630 // AT3G27690 // AT2G05070 // ATCG00300 // AT1G32060 // AT1G06680 // AT1G67090 // AT3G61470 // AT3G08940 // AT4G02770 // AT2G34420
			GO:0031984	C	organelle subcompartment	15	191	428	28397	3.4e-07	2.1e-06	// AT1G29930 // AT4G05180 // AT5G66570 // AT2G20260 // AT5G35630 // AT3G27690 // AT2G05070 // ATCG00300 // AT1G32060 // AT1G06680 // AT1G67090 // AT3G61470 // AT3G08940 // AT4G02770 // AT2G34420
			GO:0009521	C	photosystem	7	191	68	28397	7.2e-07	4e-06	// AT4G02770 // AT4G05180 // AT5G66570 // AT2G20260 // ATCG00300 // AT1G06680 // AT3G61470
			GO:0030076	C	light-harvesting complex	5	191	28	28397	2.6e-06	1.3e-05	// AT3G27690 // AT1G29930 // AT3G61470 // AT2G34420 // AT2G05070
			GO:0044435	C	plastid part	23	191	1252	28397	1.5e-05	7.2e-05	// AT1G29930 // AT4G05180 // AT1G35420 // AT5G35630 // AT5G58330 // AT1G06680 // AT3G61470 // AT2G34420 // AT3G01510 // AT5G66570 // AT1G67090 // AT4G34350 // AT5G13630 // AT3G27690 // AT1G32060 // AT3G08940 // AT4G02770 // AT2G05070 // AT2G20260 // ATCG00300 // AT3G29320 // ATCG01300 // AT1G10760
			GO:0044434	C	chloroplast part	22	191	1211	28397	2.8e-05	0.00011	// AT1G29930 // AT4G05180 // AT1G35420 // AT5G35630 // AT5G58330 // AT1G06680 // AT3G61470 // AT2G34420 // AT3G01510 // AT5G66570 // AT1G67090 // AT4G34350 // AT5G13630 // AT3G27690 // AT1G32060 // AT3G08940 // AT4G02770 // AT2G05070 // AT2G20260 // ATCG00300 // AT3G29320 // AT1G10760
			GO:0048046	C	apoplast	12	191	406	28397	2.7e-05	0.00011	// AT1G65310 // AT2G29130 // AT4G05180 // AT5G66570 // AT5G13870 // AT5G35630 // AT1G67090 // AT1G32060 // AT5G58330 // AT1G06680 // AT1G18140 // AT4G30290
			GO:0005576	C	extracellular region	37	191	2824	28397	6.7e-05	0.00025	// AT1G65310 // AT4G05180 // AT2G40250 // AT5G35630 // AT1G43780 // AT5G58330 // AT1G06680 // AT3G20210 // AT3G62750 // AT5G42500 // AT4G11320 // AT2G25160 // AT2G29130 // AT5G66570 // AT5G46960 // AT4G28950 // AT1G67090 // AT5G46900 // AT4G12510 // AT4G30170 // AT3G03640 // AT5G21100 // AT5G13870 // AT1G53990 // AT2G46750 // AT1G32060 // AT5G25610 // AT3G59010 // AT2G32560 // AT3G17070 // AT3G19…
			GO:0010287	C	plastoglobule	5	191	68	28397	0.00013	0.00046	// AT2G05070 // AT5G66570 // AT2G20260 // AT2G34420 // AT4G02770
			GO:0009532	C	plastid stroma	13	191	637	28397	0.00046	0.0015	// AT1G10760 // AT4G05180 // AT5G66570 // AT1G35420 // AT5G35630 // AT1G67090 // AT4G34350 // AT5G58330 // AT1G06680 // AT3G29320 // ATCG01300 // AT1G32060 // AT3G01510
			GO:0009941	C	chloroplast envelope	12	191	573	28397	0.00061	0.0019	// AT2G05070 // AT2G20260 // AT5G35630 // AT3G27690 // AT1G32060 // AT5G58330 // AT1G06680 // AT1G67090 // AT3G08940 // AT4G02770 // AT1G10760 // AT5G13630
			GO:0009536	C	plastid	44	191	4037	28397	0.00076	0.0022	// AT1G29930 // AT3G25830 // AT4G05180 // AT4G15560 // AT1G35420 // AT5G35630 // AT1G06820 // AT5G58330 // AT1G06680 // AT3G61470 // AT2G39800 // AT3G20210 // AT1G11450 // AT5G13210 // AT2G34420 // AT3G01510 // ATCG00210 // AT5G66570 // AT3G21370 // AT1G67090 // ATCG01000 // AT4G34350 // AT2G16005 // AT1G70890 // AT1G72290 // ATCG00290 // AT5G13630 // AT3G46970 // AT5G55135 // AT3G27690 // AT4G26…
			GO:0009507	C	chloroplast	43	191	3959	28397	0.00095	0.0024	// AT1G29930 // AT3G25830 // AT4G05180 // AT4G15560 // AT1G35420 // AT5G35630 // AT1G06820 // AT5G58330 // AT1G06680 // AT3G61470 // AT2G39800 // AT3G20210 // AT1G11450 // AT5G13210 // AT2G34420 // AT3G01510 // ATCG00210 // AT5G66570 // AT3G21370 // AT1G67090 // ATCG01000 // AT4G34350 // AT2G16005 // AT1G70890 // AT1G72290 // ATCG00290 // AT5G13630 // AT3G46970 // AT5G55135 // AT3G27690 // AT4G26…
			GO:0009526	C	plastid envelope	12	191	598	28397	0.00087	0.0024	// AT2G05070 // AT2G20260 // AT5G35630 // AT3G27690 // AT1G32060 // AT5G58330 // AT1G06680 // AT1G67090 // AT3G08940 // AT4G02770 // AT1G10760 // AT5G13630
			GO:0009570	C	chloroplast stroma	12	191	603	28397	0.00093	0.0024	// AT1G10760 // AT4G05180 // AT5G66570 // AT1G35420 // AT5G35630 // AT1G67090 // AT4G34350 // AT5G58330 // AT1G06680 // AT3G29320 // AT1G32060 // AT3G01510
			GO:0043234	C	protein complex	19	191	1358	28397	0.0023	0.0056	// AT1G29930 // AT4G05180 // AT5G66570 // AT2G20260 // AT2G05070 // AT3G27690 // AT5G40840 // AT1G67090 // AT3G16650 // ATCG00300 // AT1G06680 // AT4G28510 // AT3G61470 // ATCG00210 // AT2G32950 // AT4G23570 // AT4G02770 // AT2G34420 // AT5G13630
			GO:0031090	C	organelle membrane	18	191	1327	28397	0.0041	0.0095	// AT1G29930 // AT4G05180 // AT5G66570 // AT2G20260 // AT5G35630 // AT3G27690 // AT1G67090 // AT2G05070 // ATCG00300 // AT1G32060 // AT1G06680 // AT4G28510 // AT3G61470 // AT3G62150 // AT3G08940 // AT4G02770 // AT2G34420 // AT5G13630
			GO:0031975	C	envelope	13	191	929	28397	0.011	0.024	// AT2G05070 // AT1G67090 // AT2G20260 // AT5G35630 // AT3G27690 // AT1G32060 // AT5G58330 // AT1G06680 // AT4G28510 // AT3G08940 // AT4G02770 // AT1G10760 // AT5G13630
			GO:0031967	C	organelle envelope	13	191	929	28397	0.011	0.024	// AT2G05070 // AT1G67090 // AT2G20260 // AT5G35630 // AT3G27690 // AT1G32060 // AT5G58330 // AT1G06680 // AT4G28510 // AT3G08940 // AT4G02770 // AT1G10760 // AT5G13630
			GO:0032991	C	macromolecular complex	21	191	2050	28397	0.037	0.077	// AT1G29930 // AT4G05180 // AT5G66570 // AT2G20260 // AT5G35630 // AT3G27690 // AT5G40840 // AT2G05070 // AT3G16650 // ATCG00300 // AT1G06680 // AT4G28510 // AT3G61470 // ATCG00210 // AT2G32950 // AT4G23570 // ATCG01300 // AT1G67090 // AT4G02770 // AT2G34420 // AT5G13630
			GO:0044422	C	organelle part	31	191	3385	28397	0.047	0.091	// AT1G29930 // AT4G05180 // AT1G35420 // AT5G35630 // AT5G58330 // AT1G06680 // AT4G28510 // AT3G61470 // AT2G34420 // AT3G01510 // ATCG00210 // AT5G66570 // AT1G67090 // AT1G03120 // AT4G34350 // AT3G62150 // AT2G32950 // AT5G48240 // AT5G13630 // AT3G27690 // AT1G32060 // AT5G25610 // AT3G08940 // AT4G02770 // AT2G05070 // AT2G20260 // AT5G40840 // ATCG00300 // AT3G29320 // ATCG01300 // AT1G10…
			GO:0044446	C	intracellular organelle part	31	191	3379	28397	0.046	0.091	// AT1G29930 // AT4G05180 // AT1G35420 // AT5G35630 // AT5G58330 // AT1G06680 // AT4G28510 // AT3G61470 // AT2G34420 // AT3G01510 // ATCG00210 // AT5G66570 // AT1G67090 // AT1G03120 // AT4G34350 // AT3G62150 // AT2G32950 // AT5G48240 // AT5G13630 // AT3G27690 // AT1G32060 // AT5G25610 // AT3G08940 // AT4G02770 // AT2G05070 // AT2G20260 // AT5G40840 // ATCG00300 // AT3G29320 // ATCG01300 // AT1G10…
			GO:0030312	C	external encapsulating structure	7	191	621	28397	0.13	0.22	// AT1G65310 // AT5G13870 // AT5G21100 // AT3G59010 // AT5G02490 // AT4G30290 // AT4G19810
			GO:0005618	C	cell wall	7	191	618	28397	0.13	0.22	// AT1G65310 // AT5G13870 // AT5G21100 // AT3G59010 // AT5G02490 // AT4G30290 // AT4G19810
			GO:0070013	C	intracellular organelle lumen	7	191	622	28397	0.13	0.22	// AT4G05180 // AT5G66570 // AT1G67090 // AT1G03120 // AT1G06680 // AT2G32950 // AT5G48240
			GO:0043233	C	organelle lumen	7	191	622	28397	0.13	0.22	// AT4G05180 // AT5G66570 // AT1G67090 // AT1G03120 // AT1G06680 // AT2G32950 // AT5G48240
			GO:0031974	C	membrane-enclosed lumen	7	191	628	28397	0.13	0.22	// AT4G05180 // AT5G66570 // AT1G67090 // AT1G03120 // AT1G06680 // AT2G32950 // AT5G48240
			GO:0044444	C	cytoplasmic part	74	191	9995	28397	0.17	0.27	// AT1G29930 // AT3G25830 // AT4G05180 // AT4G15560 // AT1G35420 // AT5G35630 // AT2G39450 // AT1G06820 // AT5G58330 // AT3G30720 // AT4G28510 // AT3G61470 // AT2G39800 // AT3G20210 // AT1G07985 // AT5G48030 // AT3G62750 // AT5G02490 // AT5G13210 // AT2G34420 // AT3G01510 // AT1G70890 // ATCG00210 // AT5G66570 // AT3G21370 // AT1G67090 // AT3G56080 // AT3G61170 // ATCG01000 // AT4G34350 // AT2G16…
			GO:0005737	C	cytoplasm	89	191	12233	28397	0.18	0.28	// AT1G29930 // AT4G05180 // AT4G15560 // AT1G35420 // AT1G06820 // AT5G43500 // AT5G48030 // AT3G07800 // AT1G78460 // AT3G56080 // AT4G34350 // AT1G35250 // AT4G26780 // AT5G25610 // AT5G39840 // AT3G57010 // AT1G29030 // AT1G10760 // ATCG00290 // AT4G37410 // AT2G20260 // AT3G27060 // AT2G21640 // AT3G10340 // AT5G35630 // AT5G58330 // AT1G06680 // AT2G39800 // AT1G07985 // AT3G62750 // AT5G13…

## Sheet: 2-ES-rccr2#155
genes	Locus.Identifier	Gene.Model.Name	Gene.Model.Description	Gene.Model.Type	Primary.Gene.Symbol	logFC	AveExpr	t	P.Value	adj.P.Val	B
AT1G67090	AT1G67090.1	Encodes a member of the Rubisco small subunit (RBCS) multigene family: RBCS1A (At1g67090), RBCS1B (At5g38430), RBCS2B (At5g38420), and RBCS3B (At5g38410). Functions to yield sufficient Rubisco content for leaf photosynthetic capacity.	protein_coding	RIBULOSE BISPHOSPHATE CARBOXYLASE SMALL CHAIN 1A (RBCS1A)	RIBULOSE BISPHOSPHATE CARBOXYLASE SMALL CHAIN 1A (RBCS1A)	6.0594	4.24827	5.20213	1.25e-05	0.00279138	2.90894
AT2G40330	AT2G40330.1	Encodes a member of the PYR (pyrabactin resistance )/PYL(PYR1-like)/RCAR (regulatory components of ABA receptor) family proteins with 14 members. PYR/PYL/RCAR family proteins function as abscisic acid sensors. Mediate ABA-dependent regulation of protein phosphatase 2Cs ABI1 and ABI2.	protein_coding	PYR1-LIKE 6 (PYL6)	PYR1-LIKE 6 (PYL6);REGULATORY COMPONENTS OF ABA RECEPTOR 9 (RCAR9)	5.70299	2.7861	6.862	3.33e-08	4.12e-05	8.55729
AT4G11460	AT4G11460.1	Encodes a cysteine-rich receptor-like protein kinase.	protein_coding	CYSTEINE-RICH RLK (RECEPTOR-LIKE PROTEIN KINASE) 30 (CRK30)	CYSTEINE-RICH RLK (RECEPTOR-LIKE PROTEIN KINASE) 30 (CRK30)	4.41556	-1.39489	7.36716	6.79e-09	1.17e-05	9.4473
AT5G13630	AT5G13630.1	Encodes magnesium chelatase involved in plastid-to-nucleus signal transduction.	protein_coding	GENOMES UNCOUPLED 5 (GUN5)	ABA-BINDING PROTEIN (ABAR);H SUBUNIT OF MG-CHELATASE (CHLH);CONDITIONAL CHLORINA (CCH);GENOMES UNCOUPLED 5 (GUN5); (CCH1)	4.06932	1.7837	5.268	6.25e-06	0.001866	3.61123
AT1G29930	AT1G29930.1	Subunit of light-harvesting complex II (LHCII),which absorbs light and transfers energy to the photosynthetic reaction center.	protein_coding	CHLOROPHYLL A/B BINDING PROTEIN 1 (CAB1)	CELLULOSE SYNTHASE LIKE C8 (CLSC8);LIGHT-HARVESTING CHLOROPHYLL A/B-PROTEIN 1.3 (LHCB1.3);CHLOROPHYLL A/B BINDING PROTEIN 1 (CAB1); (AB140);CHLOROPHYLL A/B PROTEIN 140 (CAB140)	3.65357	1.00456	8.78212	3.71e-11	1.78e-07	14.6452
AT1G24510	AT1G24510.1	TCP-1/cpn60 chaperonin family protein; FUNCTIONS IN: protein binding; INVOLVED IN: protein folding, cellular protein metabolic process; LOCATED IN: plasma membrane; EXPRESSED IN: 23 plant structures; EXPRESSED DURING: 14 growth stages; CONTAINS InterPro DOMAIN/s: Chaperone, tailless complex polypeptide 1 (InterPro:IPR017998), Chaperonin Cpn60/TCP-1 (InterPro:IPR002423), T-complex protein 1, epsil…	protein_coding			3.58267	1.57637	4.76524	3.52e-05	0.00554149	2.02785
AT4G22212	AT4G22212.1	Encodes a defensin-like (DEFL) family protein.	protein_coding			3.57309	1.44559	9.58486	8.47e-12	5.93e-08	16.776
AT3G13760	AT3G13760.1	Cysteine/Histidine-rich C1 domain family protein; FUNCTIONS IN: zinc ion binding; LOCATED IN: membrane; EXPRESSED IN: root, leaf; CONTAINS InterPro DOMAIN/s: DC1 (InterPro:IPR004146), Zinc finger, PHD-type (InterPro:IPR001965), C1-like (InterPro:IPR011424); BEST Arabidopsis thaliana protein match is: Cysteine/Histidine-rich C1 domain family protein (TAIR:AT1G35610.1); Has 1382 Blast hits to 598 p…	protein_coding			3.5676	-0.733754	6.4436	1.26e-07	9.45e-05	7.196
AT3G20110	AT3G20110.1	member of CYP705A	protein_coding	"CYTOCHROME P450, FAMILY 705, SUBFAMILY A, POLYPEPTIDE 20" (CYP705A20)	"CYTOCHROME P450, FAMILY 705, SUBFAMILY A, POLYPEPTIDE 20" (CYP705A20)	3.52678	-1.91481	6.69888	5.59e-08	5.42e-05	7.54855
AT5G53048	AT5G53048.1	Potential natural antisense gene, locus overlaps with AT5G53050	other_rna			3.45548	-1.86488	5.57011	2.05e-06	0.000862039	4.62809
AT4G08770	AT4G08770.1	Encodes a putative apoplastic peroxidase Prx37. Primarily expressed in the vascular bundles. Overexpression renders a dwarf phenotype with smaller plants and delayed development. Plants overexpressing Prx37 also shows an increase in the amount of esterified phenolic material associated with their walls.	protein_coding	PEROXIDASE 37 (Prx37)	PEROXIDASE 37 (Prx37)	3.4032	0.897121	5.87456	7.76e-07	0.000428832	5.74748
AT1G55380	AT1G55380.1	Cysteine/Histidine-rich C1 domain family protein; CONTAINS InterPro DOMAIN/s: DC1 (InterPro:IPR004146), C1-like (InterPro:IPR011424); BEST Arabidopsis thaliana protein match is: Cysteine/Histidine-rich C1 domain family protein (TAIR:AT1G55420.1); Has 40762 Blast hits to 3420 proteins in 277 species: Archae - 16; Bacteria - 33283; Metazoa - 2053; Fungi - 735; Plants - 1877; Viruses - 86; Other Euk…	protein_coding			3.28641	-0.0553825	5.3134	4.65e-06	0.00147954	3.9667
AT4G34350	AT4G34350.1	Arabidopsis ISPH is involved in the plastid nonmevalonate pathway of isoprenoid biosynthesis. It was shown to complement the lethal phenotype of E. coli ispH mutant and is therefore most likely encodes a protein with 4-hydroxy-3-methylbut-2-en-1-yl diphosphate reductase activity involved in the last step of mevalonate-independent isopentenyl biosynthesis. Mutant has Albino seedling.	protein_coding	4-HYDROXY-3-METHYLBUT-2-ENYL DIPHOSPHATE REDUCTASE (HDR)	4-HYDROXY-3-METHYLBUT-2-ENYL DIPHOSPHATE REDUCTASE (HDR); (ISPH);CHLOROPLAST BIOGENESIS 6 (CLB6)	3.23892	1.36703	6.65425	5.98e-08	5.93e-05	7.90543
AT1G10657	AT1G10657.1	Plant protein 1589 of unknown function; FUNCTIONS IN: molecular_function unknown; INVOLVED IN: biological_process unknown; LOCATED IN: cellular_component unknown; CONTAINS InterPro DOMAIN/s: Conserved hypothetical protein CHP01589, plant (InterPro:IPR006476); BEST Arabidopsis thaliana protein match is: Plant protein 1589 of unknown function (TAIR:AT3G55240.1); Has 115 Blast hits to 115 proteins i…	protein_coding			3.23143	0.446301	3.86982	0.000403729	0.0236131	0.015627
AT2G43140	AT2G43140.2	basic helix-loop-helix (bHLH) DNA-binding superfamily protein; FUNCTIONS IN: DNA binding, sequence-specific DNA binding transcription factor activity; INVOLVED IN: regulation of transcription; LOCATED IN: nucleus; EXPRESSED IN: root; CONTAINS InterPro DOMAIN/s: Helix-loop-helix DNA-binding domain (InterPro:IPR001092), Helix-loop-helix DNA-binding (InterPro:IPR011598); BEST Arabidopsis thaliana pr…	protein_coding			3.20025	1.2189	5.20677	6.52e-06	0.00185137	3.78483
AT3G22840	AT3G22840.1	Encodes an early light-inducible protein.	protein_coding	EARLY LIGHT-INDUCABLE PROTEIN (ELIP1)	EARLY LIGHT-INDUCABLE PROTEIN (ELIP1); (ELIP)	3.10882	0.745375	4.01199	0.000264501	0.0186452	0.103594
AT1G30100	AT1G30100.1	Encodes 9-cis-epoxycarotenoid dioxygenase, a key enzyme in the biosynthesis of abscisic acid. The expression of this gene increases during the first 6h of imbibition.	protein_coding	NINE-CIS-EPOXYCAROTENOID DIOXYGENASE 5 (NCED5)	NINE-CIS-EPOXYCAROTENOID DIOXYGENASE 5 (ATNCED5);NINE-CIS-EPOXYCAROTENOID DIOXYGENASE 5 (NCED5)	3.08124	-2.06136	4.34399	9.68e-05	0.0107502	1.29541
AT1G54000	AT1G54000.1	GDSL-like Lipase/Acylhydrolase superfamily protein; FUNCTIONS IN: lipase activity, hydrolase activity, acting on ester bonds, carboxylesterase activity; INVOLVED IN: lipid metabolic process; LOCATED IN: vacuolar membrane, plasma membrane, vacuole, plant-type cell wall, plant-type vacuole; EXPRESSED IN: stem, cultured cell, callus; EXPRESSED DURING: seedling growth; CONTAINS InterPro DOMAIN/s: Lip…	protein_coding	GDSL LIPASE-LIKE PROTEIN 22 (GLL22)	GDSL LIPASE-LIKE PROTEIN 22 (GLL22)	3.04204	0.147481	3.69867	0.000666936	0.0315398	-0.399287
AT1G43800	AT1G43800.1	Plant stearoyl-acyl-carrier-protein desaturase family protein; FUNCTIONS IN: acyl-[acyl-carrier-protein] desaturase activity, oxidoreductase activity, transition metal ion binding; INVOLVED IN: oxidation reduction, fatty acid metabolic process, fatty acid biosynthetic process; LOCATED IN: membrane; EXPRESSED IN: 9 plant structures; EXPRESSED DURING: 6 growth stages; CONTAINS InterPro DOMAIN/s: Ri…	protein_coding	FLORAL TRANSITION AT THE MERISTEM1 (FTM1)	FLORAL TRANSITION AT THE MERISTEM1 (FTM1)	3.03611	0.0242097	3.86359	0.00041123	0.0237867	-0.0428764
AT5G11260	AT5G11260.1	Basic leucine zipper (bZIP) transcription factor. Nuclear localization. Involved in light-regulated transcriptional activation of G-box-containing promoters. Negatively regulated by Cop1. Although cytokinins do not appear to affect the gene's promoter activity, they appear to stabilize the protein. HY5 plays a role in anthocyanin accumulation in far-red light and blue light, but not in red light …	protein_coding	ELONGATED HYPOCOTYL 5 (HY5)	REVERSAL OF THE DET PHENOTYPE 5 (TED 5);ELONGATED HYPOCOTYL 5 (HY5)	3.02162	1.24138	7.55631	3.42e-09	9.95e-06	10.9482
AT4G01540	AT4G01540.1	Encodes a membrane-bound NAC (for NAM, ATAF1/2, CUC2) transcription factor, designated NTM1 (for NAC with transmembrane motif1). NTM1 regulates cell division in Arabidopsis.	protein_coding	NAC WITH TRANSMEMBRANE MOTIF1 (NTM1)	ARABIDOPSIS NAC DOMAIN CONTAINING PROTEIN 68 (ANAC068);NAC WITH TRANSMEMBRANE MOTIF1 (NTM1)	2.91618	0.988017	3.57967	0.000940781	0.0382081	-0.699568
AT3G49630	AT3G49630.1	2-oxoglutarate (2OG) and Fe(II)-dependent oxygenase superfamily protein; FUNCTIONS IN: oxidoreductase activity, iron ion binding; INVOLVED IN: aging, cellular response to starvation; LOCATED IN: endomembrane system; EXPRESSED IN: stem, root, carpel; EXPRESSED DURING: petal differentiation and expansion stage; CONTAINS InterPro DOMAIN/s: Isopenicillin N synthase (InterPro:IPR002283), Oxoglutarate/…	protein_coding			2.90058	-2.34287	5.32831	4.44e-06	0.00145511	3.7277
AT2G35270	AT2G35270.1	Direct target of AGAMOUS. Regulates patterning and differentiation of reproductive organs.	protein_coding	GIANT KILLER (GIK)	GIANT KILLER (GIK)	2.84818	-1.22299	4.76536	2.62e-05	0.00447888	2.34426
AT1G67110	AT1G67110.1	member of CYP709A	protein_coding	"CYTOCHROME P450, FAMILY 735, SUBFAMILY A, POLYPEPTIDE 2" (CYP735A2)	"CYTOCHROME P450, FAMILY 735, SUBFAMILY A, POLYPEPTIDE 2" (CYP735A2)	2.80531	-0.204789	5.08494	9.6e-06	0.00228992	3.34006
AT1G12010	AT1G12010.1	Encodes a protein that appears to have 1-amino-cyclopropane-1-carboxylic acid oxidase activity based on mutant analyses.	protein_coding			2.80436	2.5234	4.27324	0.000120119	0.0121843	1.11014
AT1G14630	AT1G14630.1	unknown protein; BEST Arabidopsis thaliana protein match is: unknown protein (TAIR:AT2G01990.1); Has 125 Blast hits to 123 proteins in 14 species: Archae - 0; Bacteria - 0; Metazoa - 0; Fungi - 0; Plants - 125; Viruses - 0; Other Eukaryotes - 0 (source: NCBI BLink).	protein_coding			2.72777	0.263007	4.07913	0.00021625	0.0165715	0.526443
AT2G27420	AT2G27420.1	Cysteine proteinases superfamily protein; FUNCTIONS IN: cysteine-type peptidase activity, cysteine-type endopeptidase activity; INVOLVED IN: proteolysis; LOCATED IN: endomembrane system; EXPRESSED IN: 15 plant structures; EXPRESSED DURING: 10 growth stages; CONTAINS InterPro DOMAIN/s: Peptidase C1A, papain (InterPro:IPR013128), Proteinase inhibitor I29, cathepsin propeptide (InterPro:IPR013201), …	protein_coding			2.68302	-2.52648	3.82758	0.000457319	0.0256062	-0.0891502
AT5G37970	AT5G37970.1	S-adenosyl-L-methionine-dependent methyltransferases superfamily protein; FUNCTIONS IN: S-adenosylmethionine-dependent methyltransferase activity, methyltransferase activity; INVOLVED IN: biological_process unknown; EXPRESSED IN: 6 plant structures; EXPRESSED DURING: M germinated pollen stage, 4 anthesis, petal differentiation and expansion stage; CONTAINS InterPro DOMAIN/s: SAM dependent carboxy…	protein_coding			2.63905	-2.7497	4.36113	9.18e-05	0.0104207	1.29379
AT4G21870	AT4G21870.1	HSP20-like chaperones superfamily protein; CONTAINS InterPro DOMAIN/s: Heat shock protein Hsp20 (InterPro:IPR002068), HSP20-like chaperone (InterPro:IPR008978); BEST Arabidopsis thaliana protein match is: HSP20-like chaperones superfamily protein (TAIR:AT1G53540.1); Has 2331 Blast hits to 2331 proteins in 523 species: Archae - 47; Bacteria - 802; Metazoa - 2; Fungi - 44; Plants - 1239; Viruses - …	protein_coding			2.61653	4.46138	5.17738	7.16e-06	0.001928	3.57587
AT4G14690	AT4G14690.1	Encodes an early light-induced protein. ELIPs are thought not to be directly involved in the synthesis and assembly of specific photosynthetic complexes, but rather affect the biogenesis of all chlorophyll-binding complexes. A study (PMID 17553115) has shown that the chlorophyll synthesis pathway was downregulated as a result of constitutive ELIP2 expression, leading to decreased chlorophyll avai…	protein_coding	EARLY LIGHT-INDUCIBLE PROTEIN 2 (ELIP2)	EARLY LIGHT-INDUCIBLE PROTEIN 2 (ELIP2)	2.54213	0.0580869	4.0687	0.000223139	0.0166735	0.214731
AT1G77240	AT1G77240.1	AMP-dependent synthetase and ligase family protein; FUNCTIONS IN: catalytic activity; INVOLVED IN: metabolic process; CONTAINS InterPro DOMAIN/s: AMP-binding, conserved site (InterPro:IPR020845), AMP-dependent synthetase/ligase (InterPro:IPR000873); BEST Arabidopsis thaliana protein match is: AMP-dependent synthetase and ligase family protein (TAIR:AT1G21540.1); Has 78814 Blast hits to 72062 prot…	protein_coding			2.53886	-2.35853	4.69785	3.24e-05	0.00519206	2.06129
AT4G19720	AT4G19720.1	Glycosyl hydrolase family protein with chitinase insertion domain; FUNCTIONS IN: cation binding, chitinase activity, hydrolase activity, hydrolyzing O-glycosyl compounds, catalytic activity; INVOLVED IN: carbohydrate metabolic process; LOCATED IN: cellular_component unknown; EXPRESSED IN: root; CONTAINS InterPro DOMAIN/s: Glycoside hydrolase, family 18, catalytic domain (InterPro:IPR001223), Chit…	protein_coding			2.48594	-1.58528	4.0842	0.000212979	0.0165514	0.534046
AT5G38430	AT5G38430.1	Encodes a member of the Rubisco small subunit (RBCS) multigene family: RBCS1A (At1g67090), RBCS1B (At5g38430), RBCS2B (At5g38420), and RBCS3B (At5g38410).	protein_coding	RUBISCO SMALL SUBUNIT 1B (RBCS1B)	RUBISCO SMALL SUBUNIT 1B (RBCS1B)	2.47865	5.79331	3.68424	0.000695508	0.0322375	-0.944335
AT5G38344	AT5G38344.1	Toll-Interleukin-Resistance (TIR) domain family protein; FUNCTIONS IN: transmembrane receptor activity; INVOLVED IN: signal transduction, innate immune response; LOCATED IN: intrinsic to membrane, endomembrane system; CONTAINS InterPro DOMAIN/s: Toll-Interleukin receptor (InterPro:IPR000157); BEST Arabidopsis thaliana protein match is: Disease resistance protein (TIR-NBS-LRR class) family (TAIR:A…	protein_coding			2.4436	-1.8136	3.68455	0.000694877	0.0322375	-0.454533
AT1G24020	AT1G24020.1	MLP-like protein 423 (MLP423); INVOLVED IN: response to biotic stimulus, defense response; LOCATED IN: membrane; EXPRESSED IN: 23 plant structures; EXPRESSED DURING: 15 growth stages; CONTAINS InterPro DOMAIN/s: Bet v I allergen (InterPro:IPR000916); BEST Arabidopsis thaliana protein match is: MLP-like protein 28 (TAIR:AT1G70830.3); Has 1440 Blast hits to 1404 proteins in 125 species: Archae - 0;…	protein_coding	MLP-LIKE PROTEIN 423 (MLP423)	MLP-LIKE PROTEIN 423 (MLP423)	2.3936	2.80093	3.67778	0.000708678	0.0327036	-0.731346
AT2G23040	AT2G23040.1	unknown protein; Has 8 Blast hits to 8 proteins in 3 species: Archae - 0; Bacteria - 0; Metazoa - 0; Fungi - 0; Plants - 8; Viruses - 0; Other Eukaryotes - 0 (source: NCBI BLink).	protein_coding			2.36786	0.466146	5.15801	7.62e-06	0.00199879	3.37303
AT1G78460	AT1G78460.1	SOUL heme-binding family protein; FUNCTIONS IN: binding; INVOLVED IN: biological_process unknown; LOCATED IN: endomembrane system; EXPRESSED IN: 21 plant structures; EXPRESSED DURING: 13 growth stages; CONTAINS InterPro DOMAIN/s: SOUL haem-binding protein (InterPro:IPR006917); BEST Arabidopsis thaliana protein match is: SOUL heme-binding family protein (TAIR:AT1G17100.1); Has 1017 Blast hits to 9…	protein_coding			2.36525	4.38454	6.52921	9.59e-08	7.75e-05	7.77951
AT4G23770	AT4G23770.1	unknown protein; BEST Arabidopsis thaliana protein match is: unknown protein (TAIR:AT4G23780.1); Has 17 Blast hits to 17 proteins in 6 species: Archae - 0; Bacteria - 2; Metazoa - 0; Fungi - 0; Plants - 13; Viruses - 0; Other Eukaryotes - 2 (source: NCBI BLink).	protein_coding			2.34849	-0.192016	3.66759	0.000729944	0.0331029	-0.481102
AT1G31200	AT1G31200.1	phloem protein 2-A9 (PP2-A9); BEST Arabidopsis thaliana protein match is: phloem protein 2-A10 (TAIR:AT1G10155.1); Has 128 Blast hits to 128 proteins in 20 species: Archae - 0; Bacteria - 0; Metazoa - 0; Fungi - 0; Plants - 128; Viruses - 0; Other Eukaryotes - 0 (source: NCBI BLink).	protein_coding	PHLOEM PROTEIN 2-A9 (PP2-A9)	PHLOEM PROTEIN 2-A9 (PP2-A9);PHLOEM PROTEIN 2-A9 (ATPP2-A9)	2.33608	0.276161	3.89543	0.000374252	0.0227773	0.100904
AT2G24645	AT2G24645.1	Transcriptional factor B3 family protein; FUNCTIONS IN: DNA binding; INVOLVED IN: regulation of transcription, DNA-dependent; CONTAINS InterPro DOMAIN/s: Transcriptional factor B3 (InterPro:IPR003340); BEST Arabidopsis thaliana protein match is: Transcriptional factor B3 family protein (TAIR:AT4G00260.1).	protein_coding			2.3097	0.940906	3.8813	0.000390243	0.0233446	0.0683578
AT1G27020	AT1G27020.1	unknown protein; BEST Arabidopsis thaliana protein match is: unknown protein (TAIR:AT1G27030.1); Has 514 Blast hits to 514 proteins in 175 species: Archae - 0; Bacteria - 311; Metazoa - 0; Fungi - 0; Plants - 65; Viruses - 0; Other Eukaryotes - 138 (source: NCBI BLink).	protein_coding			2.29385	5.45543	3.68821	0.000687537	0.0321519	-0.946144
AT5G58750	AT5G58750.1	NAD(P)-binding Rossmann-fold superfamily protein; BEST Arabidopsis thaliana protein match is: NAD(P)-binding Rossmann-fold superfamily protein (TAIR:AT4G24220.2); Has 1807 Blast hits to 1807 proteins in 277 species: Archae - 0; Bacteria - 0; Metazoa - 736; Fungi - 347; Plants - 385; Viruses - 0; Other Eukaryotes - 339 (source: NCBI BLink).	protein_coding			2.24602	-0.404743	3.87547	0.000397039	0.0234175	0.0523155
AT4G27030	AT4G27030.1	Encodes an unusual palmitate desaturase that is highly substrate specific. It introduces a delta-3 trans double bond at palmitate at the sn-2 position of phosphatidylglycerol.	protein_coding	FATTY ACID DESATURASE A (FADA)	FATTY ACID DESATURASE 4 (FAD4);FATTY ACID DESATURASE A (FADA); (FAD4)	2.22221	1.0464	3.46497	0.00130513	0.0466845	-1.03479
AT2G27120	AT2G27120.1	Encodes a protein with similarity to DNA polymerase epsilon catalytic subunit. Based on yeast two hybrid analysis, not predicted to be a subunit of the DNA polymerase epsilon complex. No phenotype observed in homozygous mutant embryos or plants but in combination with TIL1-1/til1-1 heterozygotes arrest earlier than til1 homozygotes suggesting TIL2 functions redundantly with TIL1.	protein_coding	TILTED 2 (TIL2)	TILTED 2 (TIL2); (POL2B)	2.20597	-1.3942	4.52866	5.48e-05	0.00737571	1.83694
AT2G28780	AT2G28780.1	unknown protein; INVOLVED IN: biological_process unknown; LOCATED IN: mitochondrion; EXPRESSED IN: inflorescence meristem, root, flower; EXPRESSED DURING: petal differentiation and expansion stage; CONTAINS InterPro DOMAIN/s: Protein of unknown function DUF939, bacterial (InterPro:IPR010343); BEST Arabidopsis thaliana protein match is: unknown protein (TAIR:AT3G09450.1); Has 671 Blast hits to 667…	protein_coding			2.20268	0.835868	6.63563	6.84e-08	6.1e-05	8.11157
AT1G51805	AT1G51805.1	Leucine-rich repeat protein kinase family protein; FUNCTIONS IN: protein serine/threonine kinase activity, protein kinase activity, kinase activity, ATP binding; INVOLVED IN: protein amino acid phosphorylation; LOCATED IN: endomembrane system; EXPRESSED IN: 20 plant structures; EXPRESSED DURING: 13 growth stages; CONTAINS InterPro DOMAIN/s: Protein kinase, ATP binding site (InterPro:IPR017441), P…	protein_coding			2.19728	3.58446	3.70797	0.000649141	0.0310479	-0.45981
AT1G06820	AT1G06820.1	Encodes carotenoid isomerase. Catalyzes the isomerization of poly-cis-carotenoids to all-trans-carotenoids. Together with PDS and ZDS, CRTiso is required to complete the synthesis of lycopene from phytoene.	protein_coding	CAROTENOID ISOMERASE (CRTISO)	CAROTENOID ISOMERASE (CRTISO);CAROTENOID AND CHLOROPLAST REGULATION 2 (CCR2)	2.19514	6.00568	9.59333	8.26e-12	5.93e-08	16.8651
AT3G05730	AT3G05730.1	Encodes a defensin-like (DEFL) family protein.	protein_coding			2.15177	3.34532	5.0333	1.13e-05	0.00260695	3.09381
AT1G73280	AT1G73280.1	serine carboxypeptidase-like 3 (scpl3); FUNCTIONS IN: serine-type carboxypeptidase activity; INVOLVED IN: proteolysis; LOCATED IN: endomembrane system; EXPRESSED IN: root; CONTAINS InterPro DOMAIN/s: Peptidase S10, serine carboxypeptidase (InterPro:IPR001563); BEST Arabidopsis thaliana protein match is: serine carboxypeptidase-like 2 (TAIR:AT1G73300.1); Has 3958 Blast hits to 3843 proteins in 445…	protein_coding	SERINE CARBOXYPEPTIDASE-LIKE 3 (scpl3)	SERINE CARBOXYPEPTIDASE-LIKE 3 (scpl3)	2.14252	-1.45538	3.63542	0.000801175	0.034666	-0.556179
AT2G02700	AT2G02700.1	Cysteine/Histidine-rich C1 domain family protein; FUNCTIONS IN: zinc ion binding; LOCATED IN: cellular_component unknown; CONTAINS InterPro DOMAIN/s: DC1 (InterPro:IPR004146), Zinc finger, PHD-type (InterPro:IPR001965), C1-like (InterPro:IPR011424); BEST Arabidopsis thaliana protein match is: Cysteine/Histidine-rich C1 domain family protein (TAIR:AT2G02680.1); Has 1502 Blast hits to 579 proteins …	protein_coding			2.14197	-2.5048	3.62265	0.00083127	0.0350502	-0.624396
AT2G18360	AT2G18360.1	alpha/beta-Hydrolases superfamily protein; FUNCTIONS IN: hydrolase activity; LOCATED IN: endomembrane system; EXPRESSED IN: shoot apex, hypocotyl, root, leaf; CONTAINS InterPro DOMAIN/s: Alpha/beta hydrolase fold-1 (InterPro:IPR000073); BEST Arabidopsis thaliana protein match is: alpha/beta-Hydrolases superfamily protein (TAIR:AT4G36610.1); Has 8797 Blast hits to 8792 proteins in 1517 species: Ar…	protein_coding			2.12261	-1.35677	3.6497	0.000768762	0.0340542	-0.526184
AT4G34810	AT4G34810.1	SAUR-like auxin-responsive protein family ; CONTAINS InterPro DOMAIN/s: Auxin responsive SAUR protein (InterPro:IPR003676); BEST Arabidopsis thaliana protein match is: SAUR-like auxin-responsive protein family (TAIR:AT4G34790.1); Has 1331 Blast hits to 1316 proteins in 28 species: Archae - 0; Bacteria - 0; Metazoa - 0; Fungi - 0; Plants - 1330; Viruses - 0; Other Eukaryotes - 1 (source: NCBI BLin…	protein_coding			2.11091	-0.355189	3.88368	0.000387512	0.0233123	0.078409
AT3G62150	AT3G62150.1	P-glycoprotein 21 (PGP21); FUNCTIONS IN: ATPase activity, coupled to transmembrane movement of substances; INVOLVED IN: transport, transmembrane transport; LOCATED IN: plasma membrane; EXPRESSED IN: 14 plant structures; EXPRESSED DURING: 8 growth stages; CONTAINS InterPro DOMAIN/s: ATPase, AAA+ type, core (InterPro:IPR003593), ABC transporter-like (InterPro:IPR003439), ABC transporter, transmembr…	protein_coding	ATP-BINDING CASSETTE B21 (ABCB21)	ATP-BINDING CASSETTE B21 (ABCB21);P-GLYCOPROTEIN 21 (PGP21)	2.09696	5.42464	5.83605	8.78e-07	0.000446533	5.63792
AT1G78860	AT1G78860.1	curculin-like (mannose-binding) lectin family protein, low similarity to Ser/Thr protein kinase (Zea mays) GI:2598067; contains Pfam profile PF01453: Lectin (probable mannose binding) but not the protein kinase domain of the Z. mays protein	protein_coding			2.0804	2.11215	3.74428	0.000583906	0.0292608	-0.412905
AT4G15560	AT4G15560.1	Encodes a protein with 1-deoxyxylulose 5-phosphate synthase activity involved in the MEP pathway. It is essential for chloroplast development in Arabidopsis	protein_coding	CLOROPLASTOS ALTERADOS 1 (CLA1)	(AtCLA1);1-DEOXY-D-XYLULOSE 5-PHOSPHATE SYNTHASE 2 (DXPS2);CLOROPLASTOS ALTERADOS 1 (CLA1); (CLA); (DEF);1-DEOXY-D-XYLULOSE 5-PHOSPHATE SYNTHASE (DXS)	2.07687	0.947427	7.987	9.56e-10	2.15e-06	12.1564
AT3G16280	AT3G16280.1	encodes a member of the DREB subfamily A-4 of ERF/AP2 transcription factor family. The protein contains one AP2 domain. There are 17 members in this subfamily including TINY.	protein_coding			2.03691	0.145157	3.83864	0.000442652	0.0252235	-0.0628558
AT4G11210	AT4G11210.1	Disease resistance-responsive (dirigent-like protein) family protein; FUNCTIONS IN: molecular_function unknown; INVOLVED IN: lignan biosynthetic process, defense response; LOCATED IN: endomembrane system; EXPRESSED IN: leaf lamina base, petal, hypocotyl, cauline leaf, root; EXPRESSED DURING: 4 anthesis; CONTAINS InterPro DOMAIN/s: Plant disease resistance response protein (InterPro:IPR004265); BE…	protein_coding			1.92875	-0.747331	4.08028	0.000215508	0.0165715	0.576684
AT2G29740	AT2G29740.1	UDP-glucosyl transferase 71C2 (UGT71C2); FUNCTIONS IN: quercetin 3-O-glucosyltransferase activity, quercetin 3'-O-glucosyltransferase activity, UDP-glycosyltransferase activity, quercetin 7-O-glucosyltransferase activity, transferase activity, transferring glycosyl groups; INVOLVED IN: metabolic process; LOCATED IN: cellular_component unknown; EXPRESSED IN: hypocotyl, root; CONTAINS InterPro DOMA…	protein_coding	UDP-GLUCOSYL TRANSFERASE 71C2 (UGT71C2)	UDP-GLUCOSYL TRANSFERASE 71C2 (UGT71C2)	1.92598	1.33682	7.07868	1.68e-08	2.2e-05	9.46236
AT2G14660	AT2G14660.1	unknown protein; CONTAINS InterPro DOMAIN/s: Uncharacterised protein family UPF0310 (InterPro:IPR002740); Has 2761 Blast hits to 2761 proteins in 686 species: Archae - 5; Bacteria - 1143; Metazoa - 73; Fungi - 78; Plants - 42; Viruses - 0; Other Eukaryotes - 1420 (source: NCBI BLink).	protein_coding			1.92569	1.11634	3.63937	0.000792074	0.0345763	-0.546485
AT1G59780	AT1G59780.1	NB-ARC domain-containing disease resistance protein; FUNCTIONS IN: ATP binding; INVOLVED IN: defense response, apoptosis; LOCATED IN: cellular_component unknown; EXPRESSED IN: hypocotyl, root, flower, synergid; EXPRESSED DURING: 4 anthesis; CONTAINS InterPro DOMAIN/s: NB-ARC (InterPro:IPR002182), Disease resistance protein (InterPro:IPR000767); BEST Arabidopsis thaliana protein match is: Disease …	protein_coding			1.92071	-0.214219	4.71989	3.02e-05	0.00492204	2.38133
AT3G49740	AT3G49740.1	Tetratricopeptide repeat (TPR)-like superfamily protein; FUNCTIONS IN: binding; INVOLVED IN: biological_process unknown; EXPRESSED IN: 18 plant structures; EXPRESSED DURING: 11 growth stages; CONTAINS InterPro DOMAIN/s: Pentatricopeptide repeat (InterPro:IPR002885), Tetratricopeptide-like helical (InterPro:IPR011990); BEST Arabidopsis thaliana protein match is: Pentatricopeptide repeat (PPR) supe…	protein_coding			1.91305	0.766944	4.08168	0.000214599	0.0165659	0.581857
AT2G28630	AT2G28630.1	Encodes KCS12, a member of the 3-ketoacyl-CoA synthase family involved in the biosynthesis of VLCFA (very long chain fatty acids).	protein_coding	3-KETOACYL-COA SYNTHASE 12 (KCS12)	3-KETOACYL-COA SYNTHASE 12 (KCS12)	1.87218	4.94213	5.55242	2.17e-06	0.00089424	4.64175
AT4G18460	AT4G18460.1	D-Tyr-tRNA(Tyr) deacylase family protein; FUNCTIONS IN: hydrolase activity, acting on ester bonds; INVOLVED IN: D-amino acid catabolic process; LOCATED IN: cytoplasm; EXPRESSED IN: 16 plant structures; EXPRESSED DURING: 13 growth stages; CONTAINS InterPro DOMAIN/s: D-tyrosyl-tRNA(Tyr) deacylase (InterPro:IPR003732); Has 30201 Blast hits to 17322 proteins in 780 species: Archae - 12; Bacteria - 13…	protein_coding			1.84389	1.66532	4.44037	7.2e-05	0.00893915	1.58705
AT5G19520	AT5G19520.1	mechanosensitive channel of small conductance-like 9 (MSL9); CONTAINS InterPro DOMAIN/s: Membrane protein, At2g17000, predicted (InterPro:IPR016688), Mechanosensitive ion channel MscS (InterPro:IPR006685), Like-Sm ribonucleoprotein (LSM)-related domain (InterPro:IPR010920); BEST Arabidopsis thaliana protein match is: mechanosensitive channel of small conductance-like 10 (TAIR:AT5G12080.3); Has 18…	protein_coding	MECHANOSENSITIVE CHANNEL OF SMALL CONDUCTANCE-LIKE 9 (MSL9)	MECHANOSENSITIVE CHANNEL OF SMALL CONDUCTANCE-LIKE 9 (MSL9); (ATMSL9)	1.8392	0.101369	3.90323	0.000365706	0.0223219	0.0355738
AT5G01040	AT5G01040.1	putative laccase, knockout mutant showed early flowering	protein_coding	LACCASE 8 (LAC8)	LACCASE 8 (LAC8)	1.80014	2.99149	3.97198	0.000298088	0.0201261	0.0972162
AT5G23770	AT5G23770.2	Member of the plant-specific DUF724 protein family. Arabidopsis has 10 DUF724 proteins. Loss of function mutant has a WT phenotype	protein_coding	DOMAIN OF UNKNOWN FUNCTION 724 8 (DUF8)	DOMAIN OF UNKNOWN FUNCTION 724 8 (DUF8)	1.79198	0.783696	3.52515	0.00109975	0.0421378	-0.832012
AT1G76080	AT1G76080.1	Encodes a thioredoxin localized in chloroplast stroma. Known as CDSP32 (CHLOROPLASTIC DROUGHT-INDUCED STRESS PROTEIN OF 32 KD).	protein_coding	CHLOROPLASTIC DROUGHT-INDUCED STRESS PROTEIN OF 32 KD (CDSP32)	CHLOROPLASTIC DROUGHT-INDUCED STRESS PROTEIN OF 32 KD (CDSP32);ARABIDOPSIS THALIANA CHLOROPLASTIC DROUGHT-INDUCED STRESS PROTEIN OF 32 KD (ATCDSP32)	1.78583	4.93994	3.73882	0.000593297	0.0295902	-0.510216
AT1G64320	AT1G64320.1	myosin heavy chain-related; FUNCTIONS IN: molecular_function unknown; INVOLVED IN: response to cadmium ion; LOCATED IN: cellular_component unknown; EXPRESSED IN: male gametophyte, flower, cultured cell, pollen tube; EXPRESSED DURING: L mature pollen stage, M germinated pollen stage, 4 anthesis; BEST Arabidopsis thaliana protein match is: myosin heavy chain-related (TAIR:AT5G41780.1); Has 120676 B…	protein_coding			1.73718	-0.253054	3.48736	0.00122477	0.0455158	-0.95083
AT2G46750	AT2G46750.1	Encodes a homolog of rat L-gulono-1,4-lactone (L-GulL) oxidase that is involved in the biosynthesis of L-ascorbic acid.	protein_coding	L -GULONO-1,4-LACTONE ( L -GULL) OXIDASE 2 (GULLO2)	L -GULONO-1,4-LACTONE ( L -GULL) OXIDASE 2 (GULLO2); (ATGULLO2)	1.70847	0.335548	3.95682	0.000311865	0.0205919	0.154097
AT3G46490	AT3G46490.1	2-oxoglutarate (2OG) and Fe(II)-dependent oxygenase superfamily protein; FUNCTIONS IN: oxidoreductase activity, acting on paired donors, with incorporation or reduction of molecular oxygen, 2-oxoglutarate as one donor, and incorporation of one atom each of oxygen into both donors, oxidoreductase activity, iron ion binding; INVOLVED IN: oxidation reduction, secondary metabolic process; LOCATED IN:…	protein_coding			1.70684	1.67126	3.93599	0.000331806	0.0211761	0.131128
AT1G14430	AT1G14430.1	glyoxal oxidase-related protein; FUNCTIONS IN: molecular_function unknown; INVOLVED IN: biological_process unknown; LOCATED IN: endomembrane system; CONTAINS InterPro DOMAIN/s: Galactose oxidase/kelch, beta-propeller (InterPro:IPR011043), Galactose oxidase, beta-propeller (InterPro:IPR015916), Immunoglobulin E-set (InterPro:IPR014756), Glyoxal oxidase, N-terminal (InterPro:IPR009880), Domain of u…	protein_coding			1.6947	1.02835	4.03465	0.00024715	0.0180188	0.44152
AT3G55120	AT3G55120.1	Catalyzes the conversion of chalcones into flavanones. Required for the accumulation of purple anthocyanins in leaves and stems. Co-expressed with CHS.	protein_coding	TRANSPARENT TESTA 5 (TT5)	(ATCHI);CHALCONE ISOMERASE (CHI);TRANSPARENT TESTA 5 (TT5); (A11);CHALCONE FLAVANONE ISOMERASE (CFI)	1.62963	1.54997	3.76888	0.000543357	0.0280036	-0.286296
AT2G01913	AT2G01913.1	unknown protein; Has 35333 Blast hits to 34131 proteins in 2444 species: Archae - 798; Bacteria - 22429; Metazoa - 974; Fungi - 991; Plants - 531; Viruses - 0; Other Eukaryotes - 9610 (source: NCBI BLink).	protein_coding			1.62862	0.494092	3.47353	0.00127381	0.0460379	-0.958669
AT1G71400	AT1G71400.1	Encodes a CLAVATA2 (CLV2)-related gene. Complements the clv2 mutant when expressed under the control of the CLV2 promoter.	protein_coding	RECEPTOR LIKE PROTEIN 12 (RLP12)	RECEPTOR LIKE PROTEIN 12 (AtRLP12);RECEPTOR LIKE PROTEIN 12 (RLP12)	1.61005	2.55802	4.24355	0.00013149	0.0123888	0.837594
AT4G18290	AT4G18290.1	Encodes KAT2, a member of the Shaker family potassium ion (K+) channel. Critical to stomatal opening induced by blue light. Critical to circadian rhythm of stomatal opening. Involved in plant development in response to high light intensity. Under high light intensity, the mutant plant produced less biomass compared to the wild type. The Shaker family K+ ion channels include five groups based on p…	protein_coding	POTASSIUM CHANNEL IN ARABIDOPSIS THALIANA 2 (KAT2)	POTASSIUM CHANNEL IN ARABIDOPSIS THALIANA 2 (KAT2)	1.6083	2.14095	4.67502	3.48e-05	0.00549113	2.14406
AT2G31110	AT2G31110.2	Encodes a member of the TBL (TRICHOME BIREFRINGENCE-LIKE) gene family containing a plant-specific DUF231 (domain of unknown function) domain. TBL gene family has 46 members, two of which (TBR/AT5G06700 and TBL3/AT5G01360) have been shown to be involved in the synthesis and deposition of secondary wall cellulose, presumably by influencing the esterification state of pectic polymers. A nomenclature…	protein_coding			1.60818	3.67535	4.34813	9.55e-05	0.0106712	1.1988
AT3G07000	AT3G07000.1	Cysteine/Histidine-rich C1 domain family protein; FUNCTIONS IN: zinc ion binding; INVOLVED IN: intracellular signaling pathway; LOCATED IN: cellular_component unknown; EXPRESSED IN: hypocotyl, root; CONTAINS InterPro DOMAIN/s: Protein kinase C-like, phorbol ester/diacylglycerol binding (InterPro:IPR002219), DC1 (InterPro:IPR004146), Zinc finger, PHD-type (InterPro:IPR001965), C1-like (InterPro:IP…	protein_coding			1.60622	-0.167976	4.01584	0.000261477	0.0185481	0.406322
AT2G44040	AT2G44040.1	Dihydrodipicolinate reductase, bacterial/plant; FUNCTIONS IN: dihydrodipicolinate reductase activity; INVOLVED IN: oxidation reduction, lysine biosynthetic process via diaminopimelate, metabolic process, diaminopimelate biosynthetic process; LOCATED IN: chloroplast; EXPRESSED IN: cotyledon; CONTAINS InterPro DOMAIN/s: Dihydrodipicolinate reductase, C-terminal (InterPro:IPR022663), NAD(P)-binding …	protein_coding			1.60011	3.84011	3.59966	0.000888216	0.0368575	-0.897504
AT1G47840	AT1G47840.1	Encodes a putative hexokinase.	protein_coding	HEXOKINASE 3 (HXK3)	HEXOKINASE 3 (HXK3)	1.59342	1.67756	4.07318	0.000220157	0.0166735	0.559674
AT5G25500	AT5G25500.1	unknown protein; Has 1807 Blast hits to 1807 proteins in 277 species: Archae - 0; Bacteria - 0; Metazoa - 736; Fungi - 347; Plants - 385; Viruses - 0; Other Eukaryotes - 339 (source: NCBI BLink).	protein_coding			1.5365	0.944464	3.66674	0.000731743	0.033113	-0.478924
AT2G38310	AT2G38310.1	Encodes a member of the PYR (pyrabactin resistance )/PYL(PYR1-like)/RCAR (regulatory components of ABA receptor) family proteins with 14 members. PYR/PYL/RCAR family proteins function as abscisic acid sensors. Mediate ABA-dependent regulation of protein phosphatase 2Cs ABI1 and ABI2.	protein_coding	PYR1-LIKE 4 (PYL4)	PYR1-LIKE 4 (PYL4);REGULATORY COMPONENTS OF ABA RECEPTOR 10 (RCAR10)	1.53625	6.53417	3.5058	0.00116216	0.0438096	-1.4649
AT4G13495	AT4G13495.1	Unknown gene	other_rna			1.50254	4.73127	3.63502	0.0008021	0.034666	-0.844933
AT5G59090	AT5G59090.1	subtilase 4.12 (SBT4.12); FUNCTIONS IN: identical protein binding, serine-type endopeptidase activity; INVOLVED IN: proteolysis, negative regulation of catalytic activity; LOCATED IN: apoplast, nucleus, cytoplasm; EXPRESSED IN: 6 plant structures; CONTAINS InterPro DOMAIN/s: Protease-associated PA (InterPro:IPR003137), Peptidase S8/S53, subtilisin/kexin/sedolisin (InterPro:IPR000209), Peptidase S…	protein_coding	SUBTILASE 4.12 (SBT4.12)	SUBTILASE 4.12 (ATSBT4.12);SUBTILASE 4.12 (SBT4.12)	1.47811	1.75041	7.1057	1.54e-08	2.16e-05	9.46925
AT3G45840	AT3G45840.1	Cysteine/Histidine-rich C1 domain family protein; FUNCTIONS IN: zinc ion binding; INVOLVED IN: biological_process unknown; LOCATED IN: cellular_component unknown; CONTAINS InterPro DOMAIN/s: Zinc finger, PHD-type, conserved site (InterPro:IPR019786), DC1 (InterPro:IPR004146), Zinc finger, PHD-type (InterPro:IPR001965), C1-like (InterPro:IPR011424); BEST Arabidopsis thaliana protein match is: Cyst…	protein_coding			1.46913	-0.35667	4.11714	0.000192859	0.0157566	0.681631
AT2G04030	AT2G04030.1	Encodes a chloroplast-targeted 90-kDa heat shock protein located in the stroma involved in red-light mediated deetiolation response. Mutants are resistant to chlorate, have elongated hypocotyls in light, and affect the expression of NR2, CAB, and RBCS but NOT NR1 and NiR.	protein_coding	(CR88)	HEAT SHOCK PROTEIN 88.1 (Hsp88.1);HEAT SHOCK PROTEIN 90.5 (HSP90.5);EMBRYO DEFECTIVE 1956 (emb1956);HEAT SHOCK PROTEIN 90.5 (AtHsp90.5); (CR88)	1.39825	6.9973	3.7715	0.000539213	0.0279552	-0.738282
AT1G13270	AT1G13270.1	Encodes a methionine aminopeptidase formerly called MAP1B, renamed to MAP1C.	protein_coding	METHIONINE AMINOPEPTIDASE 1B (MAP1C)	METHIONINE AMINOPEPTIDASE 1B (MAP1B);METHIONINE AMINOPEPTIDASE 1B (MAP1C)	1.39646	5.06772	6.22687	2.52e-07	0.000182211	6.7995
AT5G49170	AT5G49170.1	unknown protein; BEST Arabidopsis thaliana protein match is: unknown protein (TAIR:AT3G06840.1); Has 1807 Blast hits to 1807 proteins in 277 species: Archae - 0; Bacteria - 0; Metazoa - 736; Fungi - 347; Plants - 385; Viruses - 0; Other Eukaryotes - 339 (source: NCBI BLink).	protein_coding			1.39086	1.26162	3.70278	0.000659024	0.0313776	-0.480767
AT5G20150	AT5G20150.1	Expression is upregulated in the shoot of cax1/cax3 mutant.	protein_coding	SPX DOMAIN GENE 1 (SPX1)	SPX DOMAIN GENE 1 (SPX1);ARABIDOPSIS THALIANA SPX DOMAIN GENE 1 (ATSPX1)	1.39059	3.80901	5.25365	5.62e-06	0.00166284	3.80357
AT5G46450	AT5G46450.1	Disease resistance protein (TIR-NBS-LRR class) family; FUNCTIONS IN: transmembrane receptor activity, nucleoside-triphosphatase activity, nucleotide binding, ATP binding; INVOLVED IN: signal transduction, defense response, apoptosis, innate immune response; LOCATED IN: intrinsic to membrane; EXPRESSED IN: 18 plant structures; EXPRESSED DURING: 11 growth stages; CONTAINS InterPro DOMAIN/s: ATPase,…	protein_coding			1.3773	4.97091	3.59671	0.000895798	0.0370987	-1.15529
AT3G47570	AT3G47570.1	Leucine-rich repeat protein kinase family protein; FUNCTIONS IN: protein serine/threonine kinase activity, kinase activity, ATP binding; INVOLVED IN: transmembrane receptor protein tyrosine kinase signaling pathway, protein amino acid phosphorylation; LOCATED IN: plasma membrane; EXPRESSED IN: 13 plant structures; EXPRESSED DURING: 8 growth stages; CONTAINS InterPro DOMAIN/s: Protein kinase, ATP …	protein_coding			1.35307	4.66963	4.29646	0.000111904	0.0117694	0.896179
AT4G17870	AT4G17870.1	Encodes a member of the PYR (pyrabactin resistance )/PYL(PYR1-like)/RCAR (regulatory components of ABA receptor) family proteins with 14 members. PYR/PYL/RCAR family proteins function as abscisic acid sensors. Mediate ABA-dependent regulation of protein phosphatase 2Cs ABI1 and ABI2.	protein_coding	PYRABACTIN RESISTANCE 1 (PYR1)	REGULATORY COMPONENT OF ABA RECEPTOR 11 (RCAR11);PYRABACTIN RESISTANCE 1 (PYR1)	1.34704	5.45927	5.68456	1.42e-06	0.000636357	5.09811
AT5G35525	AT5G35525.1	PLAC8 family protein; CONTAINS InterPro DOMAIN/s: Protein of unknown function Cys-rich (InterPro:IPR006461); BEST Arabidopsis thaliana protein match is: PLANT CADMIUM RESISTANCE 2 (TAIR:AT1G14870.1); Has 35333 Blast hits to 34131 proteins in 2444 species: Archae - 798; Bacteria - 22429; Metazoa - 974; Fungi - 991; Plants - 531; Viruses - 0; Other Eukaryotes - 9610 (source: NCBI BLink).	protein_coding			1.31976	1.94336	4.66159	3.63e-05	0.00568311	1.8908
AT4G25050	AT4G25050.2	encodes an acyl carrier protein predominantly expressed in leaves. Gene expression is upregulated by light.	protein_coding	ACYL CARRIER PROTEIN 4 (ACP4)	ACYL CARRIER PROTEIN 4 (ACP4)	1.30151	6.84511	4.45422	6.9e-05	0.00872311	1.2441
AT2G18910	AT2G18910.1	hydroxyproline-rich glycoprotein family protein; Has 87 Blast hits to 67 proteins in 17 species: Archae - 0; Bacteria - 4; Metazoa - 0; Fungi - 0; Plants - 77; Viruses - 2; Other Eukaryotes - 4 (source: NCBI BLink).	protein_coding			1.2848	4.35513	3.78525	0.000517907	0.0272544	-0.510336
AT5G04310	AT5G04310.1	Pectin lyase-like superfamily protein; CONTAINS InterPro DOMAIN/s: Pectin lyase fold/virulence factor (InterPro:IPR011050), AmbAllergen (InterPro:IPR018082), Pectate lyase/Amb allergen (InterPro:IPR002022), Pectin lyase fold (InterPro:IPR012334); BEST Arabidopsis thaliana protein match is: Pectin lyase-like superfamily protein (TAIR:AT3G54920.1); Has 1753 Blast hits to 1747 proteins in 285 specie…	protein_coding			1.2734	2.22784	3.76506	0.000549482	0.0280036	-0.366118
AT1G11580	AT1G11580.1	methylesterase PCR A (PMEPCRA); FUNCTIONS IN: enzyme inhibitor activity, pectinesterase activity; INVOLVED IN: cell wall modification; LOCATED IN: cell wall, plasma membrane, plant-type cell wall; EXPRESSED IN: 25 plant structures; EXPRESSED DURING: 13 growth stages; CONTAINS InterPro DOMAIN/s: Pectinesterase, active site (InterPro:IPR018040), Pectin lyase fold/virulence factor (InterPro:IPR01105…	protein_coding	METHYLESTERASE PCR A (PMEPCRA)	(ATPMEPCRA);METHYLESTERASE PCR A (PMEPCRA)	1.27173	5.22024	6.62965	6.97e-08	6.1e-05	7.99331
AT1G65295	AT1G65295.1	unknown protein; LOCATED IN: endomembrane system; EXPRESSED IN: 22 plant structures; EXPRESSED DURING: 13 growth stages; BEST Arabidopsis thaliana protein match is: unknown protein (TAIR:AT5G01015.1); Has 90 Blast hits to 90 proteins in 15 species: Archae - 0; Bacteria - 0; Metazoa - 0; Fungi - 0; Plants - 90; Viruses - 0; Other Eukaryotes - 0 (source: NCBI BLink).	protein_coding			1.24763	3.89353	4.55971	4.98e-05	0.00701426	1.74868
AT5G43910	AT5G43910.2	pfkB-like carbohydrate kinase family protein; FUNCTIONS IN: kinase activity, ribokinase activity; INVOLVED IN: D-ribose metabolic process; LOCATED IN: cellular_component unknown; EXPRESSED IN: 19 plant structures; EXPRESSED DURING: 12 growth stages; CONTAINS InterPro DOMAIN/s: Carbohydrate/purine kinase (InterPro:IPR011611), Ribokinase (InterPro:IPR002139), Carbohydrate/puine kinase, PfkB, conser…	protein_coding			1.24239	2.25779	3.79538	0.000502731	0.0269559	-0.200031
AT1G14410	AT1G14410.1	Encodes a homolog of the potato p24 protein. Binds single strand telomeric repeats. Negatively regulates telomerase activity and telomere length.	protein_coding	WHIRLY 1 (WHY1)	WHIRLY 1 (WHY1);A. THALIANA WHIRLY 1 (ATWHY1); (PTAC1)	1.23512	3.46605	3.6888	0.000686348	0.0321519	-0.631192
AT3G44590	AT3G44590.2	60S acidic ribosomal protein family; FUNCTIONS IN: structural constituent of ribosome; INVOLVED IN: translational elongation; LOCATED IN: cytosol, cytosolic ribosome, ribosome, nucleus; EXPRESSED IN: 25 plant structures; EXPRESSED DURING: 15 growth stages; CONTAINS InterPro DOMAIN/s: Ribosomal protein 60S (InterPro:IPR001813); BEST Arabidopsis thaliana protein match is: 60S acidic ribosomal prote…	protein_coding			1.23104	3.69675	3.54905	0.00102712	0.0401509	-1.10041
AT3G47750	AT3G47750.1	member of ATH subfamily	protein_coding	ATP-BINDING CASSETTE A4 (ABCA4)	ATP-BINDING CASSETTE A4 (ABCA4); (ATATH3)	1.21182	1.84486	3.76127	0.000555602	0.0281905	-0.415842
AT1G72610	AT1G72610.1	germin-like protein (GLP1)	protein_coding	GERMIN-LIKE PROTEIN 1 (GER1)	GERMIN-LIKE PROTEIN 1 (GER1);A. THALIANA GERMIN-LIKE PROTEIN 1 (ATGER1);GERMIN-LIKE PROTEIN 1 (GLP1)	1.20011	7.52695	3.97566	0.000294832	0.0201261	-0.156333
AT2G27400	AT2G27400.1	Trans-acting siRNA1a primary transcript (TAS1a). Regulated by miR173.	other_rna	TRANS-ACTING SIRNA1A (TAS1A)	TRANS-ACTING SIRNA1A (TAS1A)	1.19308	2.90697	4.47238	6.52e-05	0.00834869	1.60185
AT1G14210	AT1G14210.1	Ribonuclease T2 family protein; FUNCTIONS IN: ribonuclease T2 activity, endoribonuclease activity, RNA binding; INVOLVED IN: response to salt stress; LOCATED IN: endomembrane system; EXPRESSED IN: 22 plant structures; EXPRESSED DURING: 13 growth stages; CONTAINS InterPro DOMAIN/s: Ribonuclease T2 (InterPro:IPR001568), Ribonuclease T2, active site (InterPro:IPR018188); BEST Arabidopsis thaliana pr…	protein_coding			1.19097	4.28718	4.20245	0.000148986	0.0134708	0.564435
AT2G47240	AT2G47240.1	Encodes an acyl-CoA synthetase that acts on long-chain and very-long-chain fatty acids, involved in cuticular wax and cutin biosynthesis	protein_coding	LONG-CHAIN ACYL-COA SYNTHASE 1 (LACS1)	(CER8);ECERIFERUM 8 (CER8);LONG-CHAIN ACYL-COA SYNTHASE 1 (LACS1)	1.16908	5.46784	3.80247	0.000492376	0.0267143	-0.635882
AT1G14810	AT1G14810.1	encodes an aspartate semialdehyde dehydrogenase, which produces the branch point intermediate for lysine and threonine/methionine biosynthesis	protein_coding			1.15934	5.71406	4.89019	1.77e-05	0.0035181	2.56959
AT3G12965	AT3G12965.1	Unknown gene	other_rna			1.15721	3.56731	3.44862	0.001367	0.0480785	-1.28279
AT5G04230	AT5G04230.2	Member of Phenylalanine ammonialyase (PAL) gene family. Differs significantly from PAL1 and PAL2 and other sequenced plant PAL genes. Arabidopsis has four PALs: AT2G37040 (PAL1), AT3G53260 (PAL2), AT5G04230 (PAL3) and AT3G10340 (PAL4).	protein_coding	PHENYL ALANINE AMMONIA-LYASE 3 (PAL3)	PHENYL ALANINE AMMONIA-LYASE 3 (PAL3)	1.13109	3.44984	4.25569	0.000126718	0.0123181	0.911009
AT2G46420	AT2G46420.1	Plant protein 1589 of unknown function; CONTAINS InterPro DOMAIN/s: Conserved hypothetical protein CHP01589, plant (InterPro:IPR006476); BEST Arabidopsis thaliana protein match is: Plant protein 1589 of unknown function (TAIR:AT3G61700.1); Has 251 Blast hits to 249 proteins in 29 species: Archae - 0; Bacteria - 0; Metazoa - 6; Fungi - 0; Plants - 223; Viruses - 0; Other Eukaryotes - 22 (source: N…	protein_coding			1.11076	3.34073	3.59148	0.00090939	0.0374886	-1.03744
AT3G62270	AT3G62270.1	HCO3- transporter family; FUNCTIONS IN: anion exchanger activity; INVOLVED IN: anion transport; LOCATED IN: integral to membrane, membrane; EXPRESSED IN: 22 plant structures; EXPRESSED DURING: 13 growth stages; CONTAINS InterPro DOMAIN/s: Bicarbonate transporter, eukaryotic (InterPro:IPR003020), Bicarbonate transporter, C-terminal (InterPro:IPR011531); BEST Arabidopsis thaliana protein match is: …	protein_coding			1.107	3.22604	3.65325	0.000760912	0.0339197	-0.923673
AT5G07900	AT5G07900.1	Mitochondrial transcription termination factor family protein; FUNCTIONS IN: molecular_function unknown; INVOLVED IN: biological_process unknown; LOCATED IN: membrane; EXPRESSED IN: 17 plant structures; EXPRESSED DURING: 11 growth stages; CONTAINS InterPro DOMAIN/s: Mitochodrial transcription termination factor-related (InterPro:IPR003690); BEST Arabidopsis thaliana protein match is: Mitochondria…	protein_coding			1.10511	2.792	3.78892	0.000512354	0.027098	-0.310368
AT1G74730	AT1G74730.1	Protein of unknown function (DUF1118); FUNCTIONS IN: molecular_function unknown; INVOLVED IN: biological_process unknown; LOCATED IN: chloroplast thylakoid membrane, chloroplast; EXPRESSED IN: 21 plant structures; EXPRESSED DURING: 13 growth stages; CONTAINS InterPro DOMAIN/s: Protein of unknown function DUF1118 (InterPro:IPR009500); BEST Arabidopsis thaliana protein match is: Protein of unknown …	protein_coding			1.10211	5.19928	3.5129	0.00113886	0.0431635	-1.35314
AT1G60680	AT1G60680.1	NAD(P)-linked oxidoreductase superfamily protein; FUNCTIONS IN: oxidoreductase activity, aldo-keto reductase activity; INVOLVED IN: oxidation reduction; EXPRESSED IN: hypocotyl, root; CONTAINS InterPro DOMAIN/s: Aldo/keto reductase (InterPro:IPR001395), Aldo/keto reductase subgroup (InterPro:IPR020471); BEST Arabidopsis thaliana protein match is: NAD(P)-linked oxidoreductase superfamily protein (…	protein_coding		ARF-GAP DOMAIN 2 (AGD2)	1.10145	2.5157	4.31497	0.000105752	0.0113387	1.16458
AT4G33865	AT4G33865.1	Ribosomal protein S14p/S29e family protein; FUNCTIONS IN: structural constituent of ribosome; INVOLVED IN: translation; LOCATED IN: cytosolic small ribosomal subunit, ribosome; EXPRESSED IN: 24 plant structures; EXPRESSED DURING: 14 growth stages; CONTAINS InterPro DOMAIN/s: Ribosomal protein S14 (InterPro:IPR001209); BEST Arabidopsis thaliana protein match is: Ribosomal protein S14p/S29e family …	protein_coding			1.09433	6.38183	4.22796	0.000137874	0.0127531	0.564654
AT2G20450	AT2G20450.1	Ribosomal protein L14; FUNCTIONS IN: structural constituent of ribosome; INVOLVED IN: translation, ribosome biogenesis; LOCATED IN: ribosome, cytosolic large ribosomal subunit, endoplasmic reticulum, vacuole; EXPRESSED IN: 23 plant structures; EXPRESSED DURING: 13 growth stages; CONTAINS InterPro DOMAIN/s: Ribosomal protein L14 (InterPro:IPR002784); BEST Arabidopsis thaliana protein match is: Rib…	protein_coding			1.0825	4.93839	4.0205	0.000257856	0.0184287	0.0735711
AT4G38100	AT4G38100.1	unknown protein; LOCATED IN: chloroplast thylakoid membrane; EXPRESSED IN: 23 plant structures; EXPRESSED DURING: 13 growth stages; BEST Arabidopsis thaliana protein match is: unknown protein (TAIR:AT4G01150.1); Has 30201 Blast hits to 17322 proteins in 780 species: Archae - 12; Bacteria - 1396; Metazoa - 17338; Fungi - 3422; Plants - 5037; Viruses - 0; Other Eukaryotes - 2996 (source: NCBI BLink…	protein_coding			1.07414	3.6207	4.1588	0.00017005	0.014649	0.586765
AT4G13220	AT4G13220.1	unknown protein; FUNCTIONS IN: molecular_function unknown; INVOLVED IN: biological_process unknown; LOCATED IN: chloroplast; EXPRESSED IN: 22 plant structures; EXPRESSED DURING: 13 growth stages; Has 27 Blast hits to 27 proteins in 10 species: Archae - 0; Bacteria - 0; Metazoa - 0; Fungi - 0; Plants - 27; Viruses - 0; Other Eukaryotes - 0 (source: NCBI BLink).	protein_coding			1.07251	3.67533	3.71219	0.000641205	0.0309699	-0.557996
AT4G11290	AT4G11290.1	Peroxidase superfamily protein; FUNCTIONS IN: peroxidase activity, heme binding; INVOLVED IN: response to oxidative stress, oxidation reduction; LOCATED IN: endomembrane system; EXPRESSED IN: 11 plant structures; EXPRESSED DURING: 7 growth stages; CONTAINS InterPro DOMAIN/s: Haem peroxidase (InterPro:IPR010255), Plant peroxidase (InterPro:IPR000823), Peroxidases heam-ligand binding site (InterPro…	protein_coding			1.06962	1.64198	4.05971	0.000229248	0.0170692	0.0920408
AT2G20020	AT2G20020.1	Promotes the splicing of chloroplast group II introns. Splices clpP-1 and ropC1 introns.	protein_coding	(CAF1)	(ATCAF1); (CAF1)	1.06932	4.55119	3.9242	0.00034364	0.0214561	-0.121105
AT3G59670	AT3G59670.1	unknown protein; BEST Arabidopsis thaliana protein match is: unknown protein (TAIR:AT4G37440.2); Has 77 Blast hits to 77 proteins in 14 species: Archae - 0; Bacteria - 0; Metazoa - 0; Fungi - 0; Plants - 73; Viruses - 0; Other Eukaryotes - 4 (source: NCBI BLink).	protein_coding			1.0683	3.42791	4.41711	7.73e-05	0.00917133	1.34434
AT2G43910	AT2G43910.2	HARMLESS TO OZONE LAYER 1 (HOL1); FUNCTIONS IN: methyltransferase activity, thiopurine S-methyltransferase activity; INVOLVED IN: metabolic process; LOCATED IN: plasma membrane; EXPRESSED IN: guard cell, cultured cell, leaf; CONTAINS InterPro DOMAIN/s: Thiopurine S-methyltransferase (InterPro:IPR008854); BEST Arabidopsis thaliana protein match is: S-adenosyl-L-methionine-dependent methyltransfera…	protein_coding	HARMLESS TO OZONE LAYER 1 (HOL1)	HARMLESS TO OZONE LAYER 1 (HOL1); (ATHOL1)	1.06528	7.14582	4.50539	5.89e-05	0.00777668	1.40454
AT3G61770	AT3G61770.1	Acid phosphatase/vanadium-dependent haloperoxidase-related protein; FUNCTIONS IN: molecular_function unknown; INVOLVED IN: biological_process unknown; LOCATED IN: chloroplast; EXPRESSED IN: 22 plant structures; EXPRESSED DURING: 13 growth stages; CONTAINS InterPro DOMAIN/s: Acid phosphatase/vanadium-dependent haloperoxidase related (InterPro:IPR003832); BEST Arabidopsis thaliana protein match is:…	protein_coding			1.0621	4.33655	3.71121	0.000643047	0.0309699	-0.769132
AT5G40160	AT5G40160.1	Encodes ankyrin repeat protein EMB506. Mutations in this locus result in embryo lethality.	protein_coding	EMBRYO DEFECTIVE 506 (EMB506)	EMBRYO DEFECTIVE 139 (EMB139);EMBRYO DEFECTIVE 506 (EMB506)	1.04889	3.95042	3.47172	0.00128037	0.0460379	-1.26719
AT1G55140	AT1G55140.1	Ribonuclease III family protein; FUNCTIONS IN: RNA binding, ribonuclease III activity; INVOLVED IN: RNA processing; LOCATED IN: chloroplast; CONTAINS InterPro DOMAIN/s: Ribonuclease III (InterPro:IPR000999); BEST Arabidopsis thaliana protein match is: Ribonuclease III family protein (TAIR:AT3G13740.1); Has 1541 Blast hits to 1540 proteins in 746 species: Archae - 0; Bacteria - 1385; Metazoa - 0; …	protein_coding			1.04316	4.01044	3.61418	0.000851822	0.0358388	-0.962206
AT2G27720	AT2G27720.2	60S acidic ribosomal protein family; FUNCTIONS IN: structural constituent of ribosome; INVOLVED IN: translational elongation, response to cold; LOCATED IN: cytosol, cytosolic ribosome, ribosome, nucleus; EXPRESSED IN: 24 plant structures; EXPRESSED DURING: 13 growth stages; CONTAINS InterPro DOMAIN/s: Ribosomal protein 60S (InterPro:IPR001813); BEST Arabidopsis thaliana protein match is: 60S acid…	protein_coding			1.03806	6.84915	4.96692	1.39e-05	0.00293018	2.7843
AT3G59980	AT3G59980.1	Nucleic acid-binding, OB-fold-like protein; FUNCTIONS IN: tRNA binding; LOCATED IN: chloroplast; EXPRESSED IN: 22 plant structures; EXPRESSED DURING: 13 growth stages; CONTAINS InterPro DOMAIN/s: Nucleic acid-binding, OB-fold-like (InterPro:IPR016027), Nucleic acid-binding, OB-fold (InterPro:IPR012340), tRNA-binding domain (InterPro:IPR002547); BEST Arabidopsis thaliana protein match is: methioni…	protein_coding			1.03169	4.32511	3.43002	0.00144077	0.049756	-1.52941
AT3G28460	AT3G28460.1	methyltransferases; FUNCTIONS IN: methyltransferase activity; INVOLVED IN: rRNA methylation; LOCATED IN: chloroplast; EXPRESSED IN: 21 plant structures; EXPRESSED DURING: 13 growth stages; CONTAINS InterPro DOMAIN/s: Conserved hypothetical protein CHP00095 (InterPro:IPR004398); Has 4869 Blast hits to 4869 proteins in 1755 species: Archae - 2; Bacteria - 3296; Metazoa - 0; Fungi - 0; Plants - 49; …	protein_coding			1.02897	3.88813	3.47283	0.00127636	0.0460379	-1.30412
AT3G16080	AT3G16080.1	Zinc-binding ribosomal protein family protein; FUNCTIONS IN: structural constituent of ribosome; INVOLVED IN: translation, ribosome biogenesis; LOCATED IN: ribosome, cytosolic large ribosomal subunit; EXPRESSED IN: 24 plant structures; EXPRESSED DURING: 13 growth stages; CONTAINS InterPro DOMAIN/s: Ribosomal protein L37e, conserved site (InterPro:IPR018267), Ribosomal protein, zinc-binding domain…	protein_coding			1.02754	5.43812	5.00048	1.25e-05	0.0027992	2.9363
AT3G03640	AT3G03640.1	Encodes beta-glucosidase (GLUC).	protein_coding	BETA GLUCOSIDASE 25 (BGLU25)	(GLUC);BETA GLUCOSIDASE 25 (BGLU25)	1.02699	4.77438	4.88429	1.81e-05	0.00354544	2.53996
AT3G52380	AT3G52380.1	chloroplast RNA-binding protein	protein_coding	CHLOROPLAST RNA-BINDING PROTEIN 33 (CP33)	CHLOROPLAST RNA-BINDING PROTEIN 33 (CP33);PIGMENT DEFECTIVE 322 (PDE322)	1.01635	6.02699	4.00745	0.000268124	0.0188287	-0.0679871
AT3G51600	AT3G51600.1	Predicted to encode a PR (pathogenesis-related) protein. Belongs to the lipid transfer protein (PR-14) family with the following members: At2g38540/LTP1, At2g38530/LTP2, At5g59320/LTP3, At5g59310/LTP4, At3g51600/LTP5, At3g08770/LTP6, At2g15050/LTP7, At2g18370/LTP8, At2g15325/LTP9, At5g01870/LTP10, At4g33355/LTP11, At3g51590/LTP12, At5g44265/LTP13, At5g62065/LTP14, At4g08530/LTP15.	protein_coding	LIPID TRANSFER PROTEIN 5 (LTP5)	LIPID TRANSFER PROTEIN 5 (LTP5)	1.01241	7.69973	4.46563	6.66e-05	0.00847255	1.30101
AT5G22440	AT5G22440.1	Ribosomal protein L1p/L10e family; FUNCTIONS IN: structural constituent of ribosome, RNA binding; INVOLVED IN: translation, RNA processing; LOCATED IN: cytosolic ribosome, ribosome, cytosolic large ribosomal subunit, nucleolus; EXPRESSED IN: 22 plant structures; EXPRESSED DURING: 13 growth stages; CONTAINS InterPro DOMAIN/s: Ribosomal protein L1 (InterPro:IPR002143), Ribosomal protein L1, 2-layer…	protein_coding			1.00835	5.28065	3.95793	0.000310837	0.0205888	-0.134765
AT3G56020	AT3G56020.1	Ribosomal protein L41 family; FUNCTIONS IN: structural constituent of ribosome; INVOLVED IN: translation; LOCATED IN: ribosome, cytosolic large ribosomal subunit; CONTAINS InterPro DOMAIN/s: Ribosomal protein L41 (InterPro:IPR007836); Has 185 Blast hits to 185 proteins in 75 species: Archae - 0; Bacteria - 0; Metazoa - 88; Fungi - 40; Plants - 48; Viruses - 0; Other Eukaryotes - 9 (source: NCBI B…	protein_coding			1.00503	5.2141	3.76769	0.000545257	0.0280036	-0.690956
AT1G16390	AT1G16390.1	organic cation/carnitine transporter 3 (3-Oct); FUNCTIONS IN: carbohydrate transmembrane transporter activity, sugar:hydrogen symporter activity; INVOLVED IN: transport, transmembrane transport; LOCATED IN: integral to membrane, membrane; EXPRESSED IN: 9 plant structures; EXPRESSED DURING: 6 growth stages; CONTAINS InterPro DOMAIN/s: Major facilitator superfamily (InterPro:IPR020846), General sub…	protein_coding	ORGANIC CATION/CARNITINE TRANSPORTER 3 (OCT3)	ORGANIC CATION/CARNITINE TRANSPORTER 3 (OCT3);ORGANIC CATION/CARNITINE TRANSPORTER 3 (ATOCT3)	1.00222	3.36108	3.69997	0.000664432	0.0315398	-0.895727
AT3G62110	AT3G62110.1	Pectin lyase-like superfamily protein; FUNCTIONS IN: polygalacturonase activity; INVOLVED IN: response to cyclopentenone, carbohydrate metabolic process; LOCATED IN: vacuole; EXPRESSED IN: 25 plant structures; EXPRESSED DURING: 15 growth stages; CONTAINS InterPro DOMAIN/s: Pectin lyase fold/virulence factor (InterPro:IPR011050), Glycoside hydrolase, family 28 (InterPro:IPR000743), Pectin lyase fo…	protein_coding			1.00174	5.15003	4.78036	2.5e-05	0.00441276	2.25894
AT4G35350	AT4G35350.1	tracheary element vacuolar protein	protein_coding	XYLEM CYSTEINE PEPTIDASE 1 (XCP1)	XYLEM CYSTEINE PEPTIDASE 1 (XCP1)	-1.00209	4.48105	-3.43848	0.00140678	0.049059	-1.601
AT5G25610	AT5G25610.1	responsive to dehydration 22 (RD22) mediated by ABA	protein_coding	RESPONSIVE TO DESSICATION 22 (RD22)	RESPONSIVE TO DESSICATION 22 (RD22); (ATRD22)	-1.00372	6.89413	-3.96425	0.000305034	0.0203951	-0.202365
AT2G33830	AT2G33830.2	Dormancy/auxin associated family protein; CONTAINS InterPro DOMAIN/s: Dormancyauxin associated (InterPro:IPR008406); BEST Arabidopsis thaliana protein match is: dormancy-associated protein-like 1 (TAIR:AT1G28330.1); Has 165 Blast hits to 165 proteins in 47 species: Archae - 0; Bacteria - 0; Metazoa - 0; Fungi - 0; Plants - 165; Viruses - 0; Other Eukaryotes - 0 (source: NCBI BLink).	protein_coding			-1.00936	10.0171	-3.5539	0.00101295	0.0399042	-1.25134
AT3G48690	AT3G48690.1	Encodes a protein with carboxylesterase whose activity was tested using both pNA and 2,4-D-methyl.	protein_coding	(CXE12)	(CXE12);ARABIDOPSIS THALIANA CARBOXYESTERASE 12 (AtCXE12)	-1.0157	6.03195	-4.37123	8.9e-05	0.010326	0.983897
AT2G38080	AT2G38080.1	LAC4 appears to have laccase activity based on enzyme assays performed using lac4 mutants. These mutants also have reduced levels of lignin. LAC4 is expressed in vascular bundles and fibers and likely contributes to lignin biosynthesis, and hence cell wall biosynthesis, there. lac4/irx12 mutants have a mild irregular xylem phenotype.	protein_coding	IRREGULAR XYLEM 12 (IRX12)	LACCASE-LIKE MULTICOPPER OXIDASE 4 (LMCO4);IRREGULAR XYLEM 12 (IRX12);LACCASE 4 (LAC4);ARABIDOPSIS LACCASE-LIKE MULTICOPPER OXIDASE 4 (ATLMCO4)	-1.01575	4.08688	-4.48081	6.35e-05	0.0082347	1.36242
AT3G24240	AT3G24240.1	Leucine-rich repeat receptor-like protein kinase family protein; FUNCTIONS IN: protein serine/threonine kinase activity, protein kinase activity, ATP binding; INVOLVED IN: transmembrane receptor protein tyrosine kinase signaling pathway, protein amino acid phosphorylation; LOCATED IN: endomembrane system; EXPRESSED IN: root; CONTAINS InterPro DOMAIN/s: Protein kinase, ATP binding site (InterPro:I…	protein_coding			-1.01635	0.768583	-3.82834	0.000456296	0.0256062	-0.263892
AT5G18980	AT5G18980.1	ARM repeat superfamily protein; FUNCTIONS IN: binding; INVOLVED IN: biological_process unknown; LOCATED IN: cellular_component unknown; CONTAINS InterPro DOMAIN/s: Armadillo-like helical (InterPro:IPR011989), Armadillo (InterPro:IPR000225), Armadillo-type fold (InterPro:IPR016024); BEST Arabidopsis thaliana protein match is: ARM repeat superfamily protein (TAIR:AT3G06210.1); Has 1807 Blast hits t…	protein_coding			-1.03853	4.44434	-4.70264	3.19e-05	0.00515425	2.12546
AT5G55970	AT5G55970.1	RING/U-box superfamily protein; FUNCTIONS IN: zinc ion binding; LOCATED IN: chloroplast; EXPRESSED IN: 15 plant structures; EXPRESSED DURING: LP.06 six leaves visible, LP.04 four leaves visible, 4 anthesis, 4 leaf senescence stage, petal differentiation and expansion stage; CONTAINS InterPro DOMAIN/s: Zinc finger, RING-type (InterPro:IPR001841), Zinc finger, C3HC4 RING-type (InterPro:IPR018957); …	protein_coding			-1.04629	5.06648	-4.43738	7.26e-05	0.00893915	1.18672
AT2G22540	AT2G22540.1	Encodes a nuclear protein that acts as a floral repressor and that functions within the thermosensory pathway. SVP represses FT expression via direct binding to the vCArG III motif in the FT promoter.	protein_coding	SHORT VEGETATIVE PHASE (SVP)	AGAMOUS-LIKE 22 (AGL22);SHORT VEGETATIVE PHASE (SVP)	-1.04887	5.73794	-5.76399	1.11e-06	0.000527373	5.34566
AT2G30600	AT2G30600.5	BTB/POZ domain-containing protein; INVOLVED IN: cell adhesion; LOCATED IN: cellular_component unknown; EXPRESSED IN: 24 plant structures; EXPRESSED DURING: 13 growth stages; CONTAINS InterPro DOMAIN/s: Coagulation factor 5/8 type, C-terminal (InterPro:IPR000421), Farnesoic acid 0-methyl transferase (InterPro:IPR022041), BTB/POZ (InterPro:IPR013069), BTB/Kelch-associated (InterPro:IPR011705), BTB/…	protein_coding			-1.0489	8.31236	-3.44232	0.00139156	0.0488604	-1.64837
AT1G04310	AT1G04310.1	encodes an ethylene receptor related to bacterial two-component histidine kinases.	protein_coding	ETHYLENE RESPONSE SENSOR 2 (ERS2)	ETHYLENE RESPONSE SENSOR 2 (ERS2)	-1.04901	3.72887	-3.69168	0.000680646	0.0319721	-0.893402
AT5G03240	AT5G03240.1	encodes ubiquitin that is attached to proteins destined for degradation. UBQ3 is most homologous with UBQ4, and is expressed in higher levels in vegetative tissue but lower levels in flowers than UBQ4. UBQ3 encodes different number of ubiquitins in different ecotypes. UBQ3 transcript level is modulated by UV-B and light/dark treatments.	protein_coding	POLYUBIQUITIN 3 (UBQ3)	POLYUBIQUITIN 3 (UBQ3)	-1.05442	9.88109	-4.77796	2.52e-05	0.00441276	2.3174
AT1G28260	AT1G28260.1	Telomerase activating protein Est1; CONTAINS InterPro DOMAIN/s: Telomerase activating protein Est1 (InterPro:IPR019458); BEST Arabidopsis thaliana protein match is: Telomerase activating protein Est1 (TAIR:AT5G19400.2); Has 490 Blast hits to 489 proteins in 126 species: Archae - 0; Bacteria - 0; Metazoa - 280; Fungi - 120; Plants - 68; Viruses - 0; Other Eukaryotes - 22 (source: NCBI BLink).	protein_coding			-1.05512	5.60942	-3.45499	0.00134256	0.0473779	-1.59941
AT1G53450	AT1G53450.1	unknown protein; BEST Arabidopsis thaliana protein match is: unknown protein (TAIR:AT3G14830.2); Has 71 Blast hits to 71 proteins in 12 species: Archae - 0; Bacteria - 0; Metazoa - 0; Fungi - 0; Plants - 71; Viruses - 0; Other Eukaryotes - 0 (source: NCBI BLink).	protein_coding			-1.05798	5.03718	-4.5551	5.05e-05	0.00706771	1.53882
AT5G14780	AT5G14780.1	Encodes a NAD-dependent formate dehydrogenase.	protein_coding	FORMATE DEHYDROGENASE (FDH)	FORMATE DEHYDROGENASE (FDH)	-1.07085	7.35892	-3.99679	0.000276802	0.0191185	-0.0877098
AT5G64170	AT5G64170.2	dentin sialophosphoprotein-related; FUNCTIONS IN: molecular_function unknown; INVOLVED IN: biological_process unknown; LOCATED IN: cellular_component unknown; EXPRESSED IN: 17 plant structures; EXPRESSED DURING: 9 growth stages; BEST Arabidopsis thaliana protein match is: unknown protein (TAIR:AT3G54500.2); Has 181 Blast hits to 169 proteins in 40 species: Archae - 2; Bacteria - 18; Metazoa - 17;…	protein_coding			-1.09185	4.64959	-3.76113	0.000555836	0.0281905	-0.651771
AT2G21180	AT2G21180.1	unknown protein; BEST Arabidopsis thaliana protein match is: unknown protein (TAIR:AT5G19875.1); Has 124 Blast hits to 124 proteins in 12 species: Archae - 0; Bacteria - 0; Metazoa - 0; Fungi - 0; Plants - 124; Viruses - 0; Other Eukaryotes - 0 (source: NCBI BLink).	protein_coding			-1.09453	2.68756	-3.45794	0.00133139	0.0470624	-1.25806
AT3G51890	AT3G51890.1	Clathrin light chain protein; FUNCTIONS IN: structural molecule activity; INVOLVED IN: intracellular protein transport, vesicle-mediated transport; LOCATED IN: clathrin coat of trans-Golgi network vesicle, clathrin coat of coated pit; EXPRESSED IN: 20 plant structures; EXPRESSED DURING: 13 growth stages; CONTAINS InterPro DOMAIN/s: Clathrin light chain (InterPro:IPR000996); BEST Arabidopsis thali…	protein_coding			-1.10267	4.12372	-3.54849	0.00102877	0.0401509	-1.05631
AT1G04220	AT1G04220.1	Encodes KCS2, a member of the 3-ketoacyl-CoA synthase family involved in the biosynthesis of VLCFA (very long chain fatty acids).	protein_coding	3-KETOACYL-COA SYNTHASE 2 (KCS2)	3-KETOACYL-COA SYNTHASE 2 (KCS2)	-1.10492	3.05225	-5.29081	5e-06	0.00154291	3.83505
AT1G28330	AT1G28330.5	dormancy-associated protein (DRM1)	protein_coding	DORMANCY-ASSOCIATED PROTEIN-LIKE 1 (DYL1)	DORMANCY-ASSOCIATED PROTEIN-LIKE 1 (DYL1)	-1.10817	9.67383	-4.59315	4.49e-05	0.00658853	1.77294
AT1G07985	AT1G07985.1	Expressed protein; FUNCTIONS IN: molecular_function unknown; INVOLVED IN: biological_process unknown; LOCATED IN: chloroplast; Has 35333 Blast hits to 34131 proteins in 2444 species: Archae - 798; Bacteria - 22429; Metazoa - 974; Fungi - 991; Plants - 531; Viruses - 0; Other Eukaryotes - 9610 (source: NCBI BLink).	protein_coding			-1.11274	1.74042	-3.87795	0.000394138	0.0234175	-0.417618
AT2G42890	AT2G42890.1	A member of mei2-like gene family, predominantly plant-based family of genes encoding RNA binding proteins with characteristic presence of a highly conserved RNA binding motif first described in the mei2 gene of the fission yeast S. pombe. In silico analyses reveal nine mei2 -like genes in A. thaliana. They were grouped into four distinct clades, based on overall sequence similarity and subfamily…	protein_coding	MEI2-LIKE 2 (ML2)	MEI2-LIKE 2 (AML2);MEI2-LIKE 2 (ML2)	-1.11423	6.3575	-4.24514	0.000130857	0.0123888	0.608511
AT3G28100	AT3G28100.1	nodulin MtN21-like transporter family protein	protein_coding			-1.12316	2.86529	-4.32082	0.000103877	0.0112428	1.16973
AT2G43010	AT2G43010.1	Isolated as a semidominant mutation defective in red -light responses. Encodes a nuclear localized bHLH protein that interacts with active PhyB protein. Negatively regulates phyB mediated red light responses. Involved in shade avoidance response. Protein abundance is negatively regulated by PhyB.	protein_coding	PHYTOCHROME INTERACTING FACTOR 4 (PIF4)	(SRL2);PHYTOCHROME INTERACTING FACTOR 4 (PIF4); (AtPIF4)	-1.12421	5.40872	-3.63803	0.000795145	0.0346	-1.04107
AT1G71960	AT1G71960.1	Encodes a plasma membrane localized ABC transporter involved in abscisic acid transport and responses.	protein_coding	ATP-BINDING CASETTE G25 (ABCG25)	ATP-BINDING CASETTE G25 (ABCG25);ARABIDOPSIS THALIANA ATP-BINDING CASSETTE G25 (ATABCG25)	-1.12706	4.58066	-3.86626	0.000407997	0.0237305	-0.428073
AT1G01780	AT1G01780.1	Encodes a member of the Arabidopsis LIM proteins: a family of actin bundlers with distinct expression patterns. WLIM1, WLIM2a, and WLIM2b are widely expressed, whereas PLIM2a, PLIM2b, and PLIM2c are predominantly expressed in pollen. Regulates actin cytoskeleton organization.	protein_coding	PLIM2B (PLIM2b)	PLIM2B (PLIM2b)	-1.13064	4.55885	-6.18323	2.89e-07	0.000202486	6.59314
AT1G14890	AT1G14890.1	Plant invertase/pectin methylesterase inhibitor superfamily protein; FUNCTIONS IN: enzyme inhibitor activity, pectinesterase inhibitor activity, pectinesterase activity; INVOLVED IN: biological_process unknown; EXPRESSED IN: 22 plant structures; EXPRESSED DURING: 13 growth stages; CONTAINS InterPro DOMAIN/s: Pectinesterase inhibitor (InterPro:IPR006501); BEST Arabidopsis thaliana protein match is…	protein_coding			-1.14036	5.38867	-4.54459	5.22e-05	0.00712404	1.49629
AT2G35170	AT2G35170.1	Histone H3 K4-specific methyltransferase SET7/9 family protein; CONTAINS InterPro DOMAIN/s: MORN motif (InterPro:IPR003409); BEST Arabidopsis thaliana protein match is: Histone H3 K4-specific methyltransferase SET7/9 family protein (TAIR:AT4G17080.1); Has 27308 Blast hits to 6490 proteins in 565 species: Archae - 0; Bacteria - 4017; Metazoa - 4394; Fungi - 189; Plants - 2649; Viruses - 0; Other E…	protein_coding			-1.14771	3.81142	-4.72228	3e-05	0.00492204	2.16117
AT4G30290	AT4G30290.1	Encodes a xyloglucan endotransglucosylase/hydrolase with only only the endotransglucosylase (XET; EC 2.4.1.207) activity towards xyloglucan and non-detectable endohydrolytic (XEH; EC 3.2.1.151) activity. Expressed throughout both the main and the lateral root, with intensive expression at the dividing and elongating regions. Is expressed in lateral root primordia but expression ceases after later…	protein_coding	XYLOGLUCAN ENDOTRANSGLUCOSYLASE/HYDROLASE 19 (XTH19)	XYLOGLUCAN ENDOTRANSGLUCOSYLASE/HYDROLASE 19 (XTH19);XYLOGLUCAN ENDOTRANSGLUCOSYLASE/HYDROLASE 19 (ATXTH19)	-1.15515	3.1248	-4.26368	0.000123673	0.0122166	0.66866
AT5G54080	AT5G54080.1	homogentisate 1,2-dioxygenase	protein_coding	"HOMOGENTISATE 1,2-DIOXYGENASE" (HGO)	"HOMOGENTISATE 1,2-DIOXYGENASE" (HGO)	-1.1592	6.67015	-3.92013	0.000347813	0.0216066	-0.317572
AT2G28470	AT2G28470.1	putative beta-galactosidase (BGAL8 gene)	protein_coding	BETA-GALACTOSIDASE 8 (BGAL8)	BETA-GALACTOSIDASE 8 (BGAL8)	-1.16547	5.97683	-5.46189	2.9e-06	0.00106786	4.31948
AT1G60989	AT1G60989.1	Encodes a member of a family of small, secreted, cysteine rich proteins with sequence similarity to SCR (S locus cysteine-rich protein).	protein_coding	SCR-LIKE 7 (SCRL7)	SCR-LIKE 7 (SCRL7)	-1.16682	3.54774	-4.77497	2.55e-05	0.00441739	2.40359
AT2G42430	AT2G42430.1	LOB-domain protein gene LBD16. This gene contains one auxin-responsive element (AuxRE).	protein_coding	LATERAL ORGAN BOUNDARIES-DOMAIN 16 (LBD16)	ASYMMETRIC LEAVES2-LIKE 18 (ASL18);LATERAL ORGAN BOUNDARIES-DOMAIN 16 (LBD16)	-1.16918	-0.374562	-3.55155	0.00101979	0.0400849	-0.835637
AT4G04620	AT4G04620.1	autophagy 8b (ATG8B); CONTAINS InterPro DOMAIN/s: Light chain 3 (LC3) (InterPro:IPR004241); BEST Arabidopsis thaliana protein match is: Ubiquitin-like superfamily protein (TAIR:AT4G21980.2); Has 1515 Blast hits to 1513 proteins in 273 species: Archae - 0; Bacteria - 0; Metazoa - 720; Fungi - 178; Plants - 303; Viruses - 3; Other Eukaryotes - 311 (source: NCBI BLink).	protein_coding	AUTOPHAGY 8B (ATG8B)	AUTOPHAGY 8B (ATG8B)	-1.17311	4.96702	-3.81351	0.000476652	0.0261312	-0.59413
AT2G25095	AT2G25095.1	Encodes a microRNA that targets several SPL family members, including SPL3,4, and 5. By regulating the expression of SPL3 (and probably also SPL4 and SPL5), this microRNA regulates vegetative phase change. MicroRNAs are regulatory RNAs with a mature length of ~21-nucleotides that are processed from hairpin precursors by Dicer-like enzymes. MicroRNAs can negatively regulate gene expression by atte…	miRNA	MICRORNA156A (MIR156A)	MICRORNA156A (MIR156A)	-1.17453	-0.239656	-4.82749	2.16e-05	0.00401254	2.5894
AT1G80440	AT1G80440.1	Galactose oxidase/kelch repeat superfamily protein; CONTAINS InterPro DOMAIN/s: Galactose oxidase/kelch, beta-propeller (InterPro:IPR011043), Kelch repeat type 1 (InterPro:IPR006652), Kelch related (InterPro:IPR013089), Kelch-type beta propeller (InterPro:IPR015915); BEST Arabidopsis thaliana protein match is: Galactose oxidase/kelch repeat superfamily protein (TAIR:AT1G15670.1); Has 30201 Blast …	protein_coding			-1.18076	7.34714	-3.66122	0.000743548	0.033431	-1.02172
AT2G25450	AT2G25450.1	encodes a protein whose sequence is similar to ACC oxidase	protein_coding			-1.18609	6.9942	-3.77995	0.000526015	0.027543	-0.723185
AT3G12320	AT3G12320.1	unknown protein; BEST Arabidopsis thaliana protein match is: unknown protein (TAIR:AT5G06980.4); Has 102 Blast hits to 102 proteins in 16 species: Archae - 0; Bacteria - 0; Metazoa - 0; Fungi - 0; Plants - 98; Viruses - 0; Other Eukaryotes - 4 (source: NCBI BLink).	protein_coding			-1.19759	3.49867	-3.81628	0.000472789	0.0261241	-0.482081
AT4G16680	AT4G16680.1	P-loop containing nucleoside triphosphate hydrolases superfamily protein; FUNCTIONS IN: RNA helicase activity, helicase activity, nucleic acid binding, ATP binding, ATP-dependent helicase activity; LOCATED IN: cellular_component unknown; EXPRESSED IN: stem, sepal, male gametophyte, carpel, stamen; EXPRESSED DURING: 4 anthesis, petal differentiation and expansion stage; CONTAINS InterPro DOMAIN/s:…	protein_coding			-1.20368	4.81095	-4.59865	4.41e-05	0.00652257	1.65976
AT1G64110	AT1G64110.2	Target promoter of the male germline-specific transcription factor DUO1.	protein_coding	DUO1-ACTIVATED ATPASE 1 (DAA1)	DUO1-ACTIVATED ATPASE 1 (DAA1)	-1.20766	3.4876	-4.25372	0.000127483	0.0123353	0.633545
AT5G61820	AT5G61820.1	FUNCTIONS IN: molecular_function unknown; INVOLVED IN: biological_process unknown; LOCATED IN: vacuole; EXPRESSED IN: 24 plant structures; EXPRESSED DURING: 15 growth stages; CONTAINS InterPro DOMAIN/s: Stress up-regulated Nod 19 (InterPro:IPR011692); Has 30201 Blast hits to 17322 proteins in 780 species: Archae - 12; Bacteria - 1396; Metazoa - 17338; Fungi - 3422; Plants - 5037; Viruses - 0; Oth…	protein_coding			-1.21341	6.65852	-4.13462	0.000182946	0.0151831	0.304895
AT5G06860	AT5G06860.1	Encodes a polygalacturonase inhibiting protein involved in defense response. PGIPs inhibit the function of cell wall pectin degrading enzymes such as those produced by fungal pathogens. PGIP1 is induced by fungal infection.	protein_coding	POLYGALACTURONASE INHIBITING PROTEIN 1 (PGIP1)	POLYGALACTURONASE INHIBITING PROTEIN 1 (ATPGIP1);POLYGALACTURONASE INHIBITING PROTEIN 1 (PGIP1)	-1.21863	5.00394	-4.29014	0.000114084	0.0118001	0.808198
AT5G18130	AT5G18130.1	unknown protein; BEST Arabidopsis thaliana protein match is: unknown protein (TAIR:AT3G03870.2); Has 1807 Blast hits to 1807 proteins in 277 species: Archae - 0; Bacteria - 0; Metazoa - 736; Fungi - 347; Plants - 385; Viruses - 0; Other Eukaryotes - 339 (source: NCBI BLink).	protein_coding			-1.22442	6.0964	-3.4308	0.0014376	0.0497287	-1.61603
AT4G37300	AT4G37300.1	maternal effect embryo arrest 59 (MEE59); Has 70 Blast hits to 70 proteins in 15 species: Archae - 0; Bacteria - 0; Metazoa - 0; Fungi - 0; Plants - 70; Viruses - 0; Other Eukaryotes - 0 (source: NCBI BLink).	protein_coding	MATERNAL EFFECT EMBRYO ARREST 59 (MEE59)	MATERNAL EFFECT EMBRYO ARREST 59 (MEE59)	-1.22801	6.77592	-3.64324	0.000783267	0.0343346	-1.09998
AT5G44920	AT5G44920.1	Toll-Interleukin-Resistance (TIR) domain family protein; FUNCTIONS IN: transmembrane receptor activity; INVOLVED IN: signal transduction, defense response, innate immune response; LOCATED IN: endoplasmic reticulum; EXPRESSED IN: 15 plant structures; EXPRESSED DURING: 10 growth stages; CONTAINS InterPro DOMAIN/s: Toll-Interleukin receptor (InterPro:IPR000157); BEST Arabidopsis thaliana protein mat…	protein_coding			-1.22873	1.41901	-3.96416	0.000305112	0.0203951	-0.0565581
AT1G08890	AT1G08890.1	Major facilitator superfamily protein; FUNCTIONS IN: carbohydrate transmembrane transporter activity, sugar:hydrogen symporter activity; INVOLVED IN: transport, transmembrane transport; LOCATED IN: chloroplast, membrane; CONTAINS InterPro DOMAIN/s: Sugar transporter, conserved site (InterPro:IPR005829), Major facilitator superfamily (InterPro:IPR020846), General substrate transporter (InterPro:IP…	protein_coding			-1.23184	5.42936	-4.58797	4.56e-05	0.00661494	1.70778
AT2G27010	AT2G27010.1	member of CYP705A	protein_coding	"CYTOCHROME P450, FAMILY 705, SUBFAMILY A, POLYPEPTIDE 9" (CYP705A9)	"CYTOCHROME P450, FAMILY 705, SUBFAMILY A, POLYPEPTIDE 9" (CYP705A9)	-1.26469	0.708403	-3.70944	0.00064637	0.0309859	-0.478917
AT3G45300	AT3G45300.1	Encodes isovaleryl-coenzyme a dehydrogenase. Mutants have increases in 12 seed free amino acids, accumulation of seed homomethionine and 3-isovaleroyloxypropyl-glucosinolate, with a concomitant decrease in seed 3-benzoyloxypropyl-glucosinolate.	protein_coding	ISOVALERYL-COA-DEHYDROGENASE (IVD)	ISOVALERYL-COA-DEHYDROGENASE (IVDH);ISOVALERYL-COA-DEHYDROGENASE (IVD); (ATIVD)	-1.2678	7.07251	-3.79002	0.000510713	0.0270794	-0.662949
AT3G10340	AT3G10340.1	Encodes PAL4, a putative a phenylalanine ammonia-lyase. Arabidopsis has four PALs: AT2G37040 (PAL1), AT3G53260 (PAL2), AT5G04230 (PAL3) and AT3G10340 (PAL4).	protein_coding	PHENYLALANINE AMMONIA-LYASE 4 (PAL4)	PHENYLALANINE AMMONIA-LYASE 4 (PAL4)	-1.26786	4.32589	-5.90808	6.97e-07	0.00039566	5.72916
AT2G46270	AT2G46270.1	encodes a bZIP G-box binding protein whose expression is induced by ABA. It has been shown to bind to Adh that contains the G-box and is induced by cold and water deprivation. GBF3 has been shown to be expressed mostly in the root and dark-grown leaves. GBF3 can act as homodimers and as heterodimers with GFB1, GBF2 and GBF4. In addition, GBF3!?s DNA binding activity is enhanced by GIP1, GPRI1 and…	protein_coding	G-BOX BINDING FACTOR 3 (GBF3)	G-BOX BINDING FACTOR 3 (GBF3)	-1.27295	4.1208	-4.21214	0.000144664	0.0132642	0.546124
AT5G01520	AT5G01520.1	RING/U-box superfamily protein; FUNCTIONS IN: zinc ion binding; EXPRESSED IN: 17 plant structures; EXPRESSED DURING: 8 growth stages; CONTAINS InterPro DOMAIN/s: Zinc finger, RING-type, conserved site (InterPro:IPR017907), Zinc finger, RING-type (InterPro:IPR001841), Zinc finger, C3HC4 RING-type (InterPro:IPR018957); BEST Arabidopsis thaliana protein match is: RING/U-box superfamily protein (TAIR…	protein_coding	ABA INSENSITIVE RING PROTEIN 2 (AIRP2)	ABA INSENSITIVE RING PROTEIN 2 (AIRP2); (ATAIRP2)	-1.2741	4.24994	-4.26202	0.000124301	0.0122166	0.813063
AT1G48300	AT1G48300.1	unknown protein; FUNCTIONS IN: molecular_function unknown; INVOLVED IN: biological_process unknown; LOCATED IN: endomembrane system; EXPRESSED IN: 24 plant structures; EXPRESSED DURING: 15 growth stages; Has 96 Blast hits to 87 proteins in 37 species: Archae - 0; Bacteria - 2; Metazoa - 12; Fungi - 2; Plants - 65; Viruses - 0; Other Eukaryotes - 15 (source: NCBI BLink).	protein_coding	DIACYLGLYCEROL ACYLTRANSFERASE 3 (DGAT3)	DIACYLGLYCEROL ACYLTRANSFERASE 3 (DGAT3)	-1.28014	7.11239	-3.69873	0.00066682	0.0315398	-0.950692
AT5G57900	AT5G57900.1	F-box protein, interacts with SKP1/ASK1 subunit of SCF ubiquitin ligase in a glucose-dependent manner	protein_coding	SKP1 INTERACTING PARTNER 1 (SKIP1)	SKP1 INTERACTING PARTNER 1 (SKIP1)	-1.28427	4.64712	-5.74082	1.19e-06	0.000543217	5.2664
AT2G39855	AT2G39855.1	unknown protein; FUNCTIONS IN: molecular_function unknown; INVOLVED IN: biological_process unknown; LOCATED IN: chloroplast; BEST Arabidopsis thaliana protein match is: unknown protein (TAIR:AT3G55646.1); Has 35333 Blast hits to 34131 proteins in 2444 species: Archae - 798; Bacteria - 22429; Metazoa - 974; Fungi - 991; Plants - 531; Viruses - 0; Other Eukaryotes - 9610 (source: NCBI BLink).	protein_coding			-1.30156	-0.926658	-4.62677	4.04e-05	0.00615646	2.10121
AT1G32100	AT1G32100.1	Encodes a pinoresinol reductase involved in lignan biosynthesis. Expressed strongly in roots and less strongly in stems. Shows specificity for pinoresinol and not lariciresinol.	protein_coding	PINORESINOL REDUCTASE 1 (PRR1)	PINORESINOL REDUCTASE 1 (PRR1);PSEUDO-RESPONSE REGULATOR 1 (PRR1); (ATPRR1)	-1.30261	3.92723	-5.10092	9.12e-06	0.00225391	3.29623
AT3G63210	AT3G63210.1	encodes a novel zinc-finger protein with a proline-rich N-terminus, identical to senescence-associated protein SAG102	protein_coding	(MARD1)	(MARD1);MEDIATOR OF ABA-REGULATED DORMANCY 1 (MARD1)	-1.30484	5.16923	-4.99024	1.29e-05	0.00280894	2.90359
AT2G34790	AT2G34790.1	MATERNAL EFFECT EMBRYO ARREST 23 (MEE23); FUNCTIONS IN: electron carrier activity, oxidoreductase activity, FAD binding, catalytic activity; INVOLVED IN: polar nucleus fusion, embryo development ending in seed dormancy; LOCATED IN: cell wall; EXPRESSED IN: 13 plant structures; EXPRESSED DURING: 4 anthesis, petal differentiation and expansion stage; CONTAINS InterPro DOMAIN/s: FAD-binding, type 2 …	protein_coding	MATERNAL EFFECT EMBRYO ARREST 23 (MEE23)	EMBRYO SAC DEVELOPMENT ARREST 28 (EDA28);MATERNAL EFFECT EMBRYO ARREST 23 (MEE23)	-1.31028	3.2902	-4.56932	4.83e-05	0.00690096	1.79874
AT1G58180	AT1G58180.2	beta carbonic anhydrase 6 (BCA6); FUNCTIONS IN: carbonate dehydratase activity, zinc ion binding; INVOLVED IN: carbon utilization; LOCATED IN: mitochondrion; EXPRESSED IN: 23 plant structures; EXPRESSED DURING: 13 growth stages; CONTAINS InterPro DOMAIN/s: Carbonic anhydrase, prokaryotic-like, conserved site (InterPro:IPR015892), Carbonic anhydrase (InterPro:IPR001765); BEST Arabidopsis thaliana …	protein_coding	BETA CARBONIC ANHYDRASE 6 (BCA6)	BETA CARBONIC ANHYDRASE 6 (BCA6);A. THALIANA BETA CARBONIC ANHYDRASE 6 (ATBCA6)	-1.31534	6.32337	-3.53657	0.00106445	0.0412367	-1.38037
AT3G14595	AT3G14595.1	Ribosomal protein L18ae family; BEST Arabidopsis thaliana protein match is: Ribosomal protein L18ae family (TAIR:AT1G17080.1); Has 132 Blast hits to 132 proteins in 17 species: Archae - 0; Bacteria - 2; Metazoa - 0; Fungi - 0; Plants - 129; Viruses - 0; Other Eukaryotes - 1 (source: NCBI BLink).	protein_coding			-1.32253	5.12395	-3.93458	0.000333199	0.0212005	-0.192467
AT4G15550	AT4G15550.1	UDP-glucose:indole-3-acetate beta-D-glucosyltransferase	protein_coding	INDOLE-3-ACETATE BETA-D-GLUCOSYLTRANSFERASE (IAGLU)	INDOLE-3-ACETATE BETA-D-GLUCOSYLTRANSFERASE (IAGLU)	-1.32654	4.1296	-3.71966	0.000627401	0.030565	-0.8733
AT1G21680	AT1G21680.1	DPP6 N-terminal domain-like protein; FUNCTIONS IN: molecular_function unknown; INVOLVED IN: biological_process unknown; LOCATED IN: plasma membrane, vacuole, plant-type cell wall; EXPRESSED IN: 25 plant structures; EXPRESSED DURING: 13 growth stages; CONTAINS InterPro DOMAIN/s: WD40-like Beta Propeller (InterPro:IPR011659), Six-bladed beta-propeller, TolB-like (InterPro:IPR011042); BEST Arabidops…	protein_coding			-1.34162	7.86146	-4.99231	1.29e-05	0.00280894	2.8758
AT4G34000	AT4G34000.1	Encodes an ABA-responsive element-binding protein with similarity to transcription factors that is expressed in response to stress and abscisic acid.	protein_coding	ABSCISIC ACID RESPONSIVE ELEMENTS-BINDING FACTOR 3 (ABF3)	(ATABF3);ABSCISIC ACID RESPONSIVE ELEMENTS-BINDING FACTOR 3 (ABF3);DC3 PROMOTER-BINDING FACTOR 5 (DPBF5)	-1.36842	6.1774	-5.39763	3.56e-06	0.00124487	4.12304
AT1G77330	AT1G77330.1	similar to 1-aminocyclopropane-1-carboxylate oxidase GI:3386565 from (Sorghum bicolor)	protein_coding			-1.36871	3.78424	-6.80676	3.97e-08	4.39e-05	8.52755
AT5G58350	AT5G58350.1	Encodes a member of the WNK family (9 members in all) of protein kinases, the structural design of which is clearly distinct from those of other known protein kinases, such as receptor-like kinases and mitogen-activated protein kinases. Its transcription is under the control of circadian rhythms.	protein_coding	WITH NO LYSINE (K) KINASE 4 (WNK4)	WITH NO LYSINE (K) KINASE 4 (WNK4); (ZIK2)	-1.43296	4.96438	-5.84115	8.64e-07	0.000446533	5.55128
AT1G80180	AT1G80180.1	unknown protein; FUNCTIONS IN: molecular_function unknown; INVOLVED IN: biological_process unknown; LOCATED IN: plasma membrane; EXPRESSED IN: 21 plant structures; EXPRESSED DURING: 10 growth stages; BEST Arabidopsis thaliana protein match is: unknown protein (TAIR:AT1G15400.3); Has 30201 Blast hits to 17322 proteins in 780 species: Archae - 12; Bacteria - 1396; Metazoa - 17338; Fungi - 3422; Pla…	protein_coding			-1.43309	6.08517	-4.14874	0.000175305	0.0149023	0.364288
AT4G16190	AT4G16190.1	Papain family cysteine protease; FUNCTIONS IN: cysteine-type peptidase activity, cysteine-type endopeptidase activity; INVOLVED IN: proteolysis; LOCATED IN: vacuole; EXPRESSED IN: 23 plant structures; EXPRESSED DURING: 13 growth stages; CONTAINS InterPro DOMAIN/s: Peptidase C1A, papain (InterPro:IPR013128), Proteinase inhibitor I29, cathepsin propeptide (InterPro:IPR013201), Peptidase C1A, papain…	protein_coding			-1.43423	9.19556	-5.39446	3.59e-06	0.00124487	4.1641
AT5G26146	AT5G26146.1	Potential natural antisense gene, locus overlaps with AT5G26150	other_rna			-1.45167	2.00401	-8.53281	1.88e-10	6.59e-07	13.8043
AT4G37030	AT4G37030.1	unknown protein; FUNCTIONS IN: molecular_function unknown; INVOLVED IN: biological_process unknown; LOCATED IN: endomembrane system; BEST Arabidopsis thaliana protein match is: unknown protein (TAIR:AT4G12680.1); Has 101 Blast hits to 99 proteins in 12 species: Archae - 0; Bacteria - 0; Metazoa - 0; Fungi - 0; Plants - 101; Viruses - 0; Other Eukaryotes - 0 (source: NCBI BLink).	protein_coding			-1.46708	1.73	-3.89065	0.000379599	0.0229437	0.0542491
AT5G26340	AT5G26340.1	Encodes a protein with high affinity, hexose-specific/H+ symporter activity. The activity of the transporter appears to be negatively regulated by phosphorylation. Importantly, microarray analysis, as well as the study of the expression of this gene in mutants involved in programmed cell death (PCD) demonstrated a tight correlation between this gene's expression and PCD.	protein_coding	(MSS1)	(MSS1);SUGAR TRANSPORT PROTEIN 13 (ATSTP13);SUGAR TRANSPORT PROTEIN 13 (STP13)	-1.47175	5.86382	-3.76632	0.000547447	0.0280036	-0.691667
AT5G05410	AT5G05410.1	Encodes a transcription factor that specifically binds to DRE/CRT cis elements (responsive to drought and low-temperature stress). Belongs to the DREB subfamily A-2 of ERF/AP2 transcription factor family (DREB2A). There are eight members in this subfamily including DREB2B. The protein contains one AP2 domain. Overexpression of transcriptional activation domain of DREB2A resulted in significant dr…	protein_coding	DRE-BINDING PROTEIN 2A (DREB2A)	DRE-BINDING PROTEIN 2A (DREB2A);DEHYDRATION-RESPONSIVE ELEMENT BINDING PROTEIN 2 (DREB2)	-1.47721	4.46172	-4.58125	4.66e-05	0.00669595	1.67975
AT2G13360	AT2G13360.1	Encodes a peroxisomal photorespiratory enzyme that catalyzes transamination reactions with multiple substrates. It is involved in photorespiration.	protein_coding	ALANINE:GLYOXYLATE AMINOTRANSFERASE (AGT)	L-SERINE:GLYOXYLATE AMINOTRANSFERASE (SGAT);ALANINE:GLYOXYLATE AMINOTRANSFERASE (AGT);ALANINE:GLYOXYLATE AMINOTRANSFERASE 1 (AGT1)	-1.48371	9.56803	-5.39245	3.62e-06	0.00124487	4.13705
AT5G03260	AT5G03260.1	putative laccase, a member of laccase family of genes (17 members in Arabidopsis).	protein_coding	LACCASE 11 (LAC11)	LACCASE 11 (LAC11)	-1.48896	4.00275	-4.96636	1.4e-05	0.00293018	2.8583
AT3G62020	AT3G62020.1	germin-like protein (GLP10)	protein_coding	GERMIN-LIKE PROTEIN 10 (GLP10)	GERMIN-LIKE PROTEIN 10 (GLP10)	-1.4891	3.09391	-4.24522	0.000130825	0.0123888	0.921833
AT3G26740	AT3G26740.1	transcripts are differentially regulated at the level of mRNA stability at different times of day controlled by the circadian clock. mRNAs are targets of the mRNA degradation pathway mediated by the downstream (DST) instability determinant.	protein_coding	CCR-LIKE (CCL)	CCR-LIKE (CCL)	-1.49051	8.66164	-5.52447	2.37e-06	0.000940739	4.52591
AT2G39800	AT2G39800.1	encodes a delta1-pyrroline-5-carboxylate synthase that catalyzes the rate-limiting enzyme in the biosynthesis of proline. Gene is expressed in reproductive organs and tissues under non-stress conditions but in the whole plant under water-limiting condition. Expression is also induced by abscisic acid and salt stress in a light-dependent manner. encodes a delta1-pyrroline-5-carboxylate synthase th…	protein_coding	DELTA1-PYRROLINE-5-CARBOXYLATE SYNTHASE 1 (P5CS1)	DELTA1-PYRROLINE-5-CARBOXYLATE SYNTHASE 1 (P5CS1); (ATP5CS)	-1.49335	5.92178	-4.18391	0.0001576	0.0139626	0.551694
AT2G26692	AT2G26692.1	Potential natural antisense gene, locus overlaps with AT2G26690	other_rna			-1.49461	-1.38399	-4.85463	1.98e-05	0.00378541	2.74676
AT3G21550	AT3G21550.1	DUF679 domain membrane protein 2 (DMP2); CONTAINS InterPro DOMAIN/s: Protein of unknown function DUF679 (InterPro:IPR007770); BEST Arabidopsis thaliana protein match is: DUF679 domain membrane protein 1 (TAIR:AT3G21520.1); Has 265 Blast hits to 257 proteins in 17 species: Archae - 0; Bacteria - 0; Metazoa - 0; Fungi - 0; Plants - 265; Viruses - 0; Other Eukaryotes - 0 (source: NCBI BLink).	protein_coding	DUF679 DOMAIN MEMBRANE PROTEIN 2 (DMP2)	ARABIDOPSIS THALIANA DUF679 DOMAIN MEMBRANE PROTEIN 2 (AtDMP2);DUF679 DOMAIN MEMBRANE PROTEIN 2 (DMP2)	-1.51231	3.64489	-4.002	0.000272524	0.0188851	0.115748
AT1G73300	AT1G73300.1	serine carboxypeptidase-like 2 (scpl2); FUNCTIONS IN: serine-type carboxypeptidase activity; INVOLVED IN: proteolysis; LOCATED IN: endomembrane system; CONTAINS InterPro DOMAIN/s: Peptidase S10, serine carboxypeptidase (InterPro:IPR001563); BEST Arabidopsis thaliana protein match is: serine carboxypeptidase-like 1 (TAIR:AT5G36180.1); Has 4062 Blast hits to 3951 proteins in 474 species: Archae - 0…	protein_coding	SERINE CARBOXYPEPTIDASE-LIKE 2 (scpl2)	SERINE CARBOXYPEPTIDASE-LIKE 2 (scpl2)	-1.52948	0.578137	-3.4757	0.00126599	0.0460379	-1.19573
AT4G24480	AT4G24480.1	Protein kinase superfamily protein; FUNCTIONS IN: protein serine/threonine/tyrosine kinase activity, kinase activity; INVOLVED IN: protein amino acid phosphorylation; LOCATED IN: cellular_component unknown; EXPRESSED IN: 10 plant structures; EXPRESSED DURING: 4 anthesis, LP.10 ten leaves visible, petal differentiation and expansion stage, LP.12 twelve leaves visible; CONTAINS InterPro DOMAIN/s: P…	protein_coding			-1.53531	4.57186	-4.67653	3.46e-05	0.00549113	2.03093
AT1G77450	AT1G77450.1	NAC domain containing protein 32 (NAC032); FUNCTIONS IN: sequence-specific DNA binding transcription factor activity; INVOLVED IN: multicellular organismal development, regulation of transcription; LOCATED IN: cellular_component unknown; EXPRESSED IN: 16 plant structures; EXPRESSED DURING: LP.06 six leaves visible, LP.04 four leaves visible, 4 anthesis, petal differentiation and expansion stage, …	protein_coding	NAC DOMAIN CONTAINING PROTEIN 32 (NAC032)	NAC DOMAIN CONTAINING PROTEIN 32 (anac032);NAC DOMAIN CONTAINING PROTEIN 32 (NAC032)	-1.54735	4.31348	-4.40456	8.04e-05	0.00941148	1.11248
AT1G10830	AT1G10830.1	Encodes a functional 15-cis-zeta-carotene isomerase (Z-ISO).	protein_coding	15-CIS-ZETA-CAROTENE ISOMERASE (Z-ISO)	(Z-ISO1.1);15-CIS-ZETA-CAROTENE ISOMERASE (Z-ISO)	-1.56994	3.88501	-4.624	4.08e-05	0.00615852	2.05413
AT5G02540	AT5G02540.1	NAD(P)-binding Rossmann-fold superfamily protein; FUNCTIONS IN: oxidoreductase activity, binding, catalytic activity; INVOLVED IN: oxidation reduction, metabolic process; EXPRESSED IN: 22 plant structures; EXPRESSED DURING: 13 growth stages; CONTAINS InterPro DOMAIN/s: NAD(P)-binding domain (InterPro:IPR016040), Glucose/ribitol dehydrogenase (InterPro:IPR002347), Short-chain dehydrogenase/reducta…	protein_coding			-1.57705	3.67763	-4.26167	0.000124432	0.0122166	0.731304
AT4G26080	AT4G26080.1	Involved in abscisic acid (ABA) signal transduction. Negative regulator of ABA promotion of stomatal closure.	protein_coding	ABA INSENSITIVE 1 (ABI1)	ABA INSENSITIVE 1 (ABI1); (AtABI1)	-1.57977	6.5411	-7.4104	5.93e-09	1.17e-05	10.3986
AT2G15880	AT2G15880.1	Leucine-rich repeat (LRR) family protein; FUNCTIONS IN: structural constituent of cell wall; LOCATED IN: endomembrane system; EXPRESSED IN: 15 plant structures; EXPRESSED DURING: 8 growth stages; CONTAINS InterPro DOMAIN/s: Leucine-rich repeat (InterPro:IPR001611); BEST Arabidopsis thaliana protein match is: Leucine-rich repeat (LRR) family protein (TAIR:AT4G33970.1); Has 436796 Blast hits to 106…	protein_coding			-1.58678	6.31259	-3.62813	0.000818237	0.0349909	-1.13698
AT3G25740	AT3G25740.1	Encodes a plastid localized methionine aminopeptidase. Formerly called MAP1C, now called MAP1B.	protein_coding	METHIONINE AMINOPEPTIDASE 1C (MAP1B)	METHIONINE AMINOPEPTIDASE 1C (MAP1C);METHIONINE AMINOPEPTIDASE 1C (MAP1B)	-1.62991	3.06526	-3.58024	0.000939224	0.0382081	-0.732544
AT1G23052	AT1G23052.1		other_rna			-1.63586	3.99842	-4.88974	1.78e-05	0.0035181	2.62928
AT2G31980	AT2G31980.1	PHYTOCYSTATIN 2 (CYS2); FUNCTIONS IN: cysteine-type endopeptidase inhibitor activity; INVOLVED IN: biological_process unknown; LOCATED IN: endomembrane system; EXPRESSED IN: 18 plant structures; EXPRESSED DURING: 11 growth stages; CONTAINS InterPro DOMAIN/s: Proteinase inhibitor I25, cystatin, conserved site (InterPro:IPR018073), Proteinase inhibitor I25, cystatin (InterPro:IPR000010), Proteinase…	protein_coding	PHYTOCYSTATIN 2 (CYS2)	PHYTOCYSTATIN 2 (AtCYS2);PHYTOCYSTATIN 2 (CYS2)	-1.63942	2.03067	-7.34635	7.24e-09	1.17e-05	10.2248
AT3G16770	AT3G16770.1	Encodes a member of the ERF (ethylene response factor) subfamily B-2 of the plant specific ERF/AP2 transcription factor family (RAP2.3). The protein contains one AP2 domain. There are 5 members in this subfamily including RAP2.2 AND RAP2.12.It is localized to the nucleus and acts as a transcriptional activator through the GCC-box. It has been identified as a suppressor of Bax-induced cell death b…	protein_coding	ETHYLENE-RESPONSIVE ELEMENT BINDING PROTEIN (EBP)	ETHYLENE-RESPONSIVE ELEMENT BINDING PROTEIN (ATEBP);ETHYLENE RESPONSE FACTOR 72 (ERF72);RELATED TO AP2 3 (RAP2.3);ETHYLENE-RESPONSIVE ELEMENT BINDING PROTEIN (EBP)	-1.64536	6.62398	-3.97196	0.000298101	0.0201261	-0.176362
AT2G34490	AT2G34490.1	Encodes a protein with C22-sterol desaturase activity. The enzyme was shown to catalyze the conversion of both 24-<i>epi</i>-campesterol and &beta;-sitosterol to brassicasterol and stigmasterol, respectively, in the presence of NADPH.	protein_coding	CYTOCHROME P450, FAMILY 710, SUBFAMILY A, POLYPEPTIDE 2 (CYP710A2)	CYTOCHROME P450, FAMILY 710, SUBFAMILY A, POLYPEPTIDE 2 (CYP710A2)	-1.65633	2.01329	-4.18528	0.00015695	0.0139626	0.762199
AT3G51000	AT3G51000.1	alpha/beta-Hydrolases superfamily protein; FUNCTIONS IN: epoxide hydrolase activity, catalytic activity; EXPRESSED IN: 22 plant structures; EXPRESSED DURING: 13 growth stages; CONTAINS InterPro DOMAIN/s: Epoxide hydrolase-like (InterPro:IPR000639), Alpha/beta hydrolase fold-1 (InterPro:IPR000073); BEST Arabidopsis thaliana protein match is: alpha/beta-Hydrolases superfamily protein (TAIR:AT3G0560…	protein_coding			-1.65866	5.2591	-5.29589	4.92e-06	0.00154085	3.95376
AT5G10770	AT5G10770.1	Eukaryotic aspartyl protease family protein; FUNCTIONS IN: DNA binding, aspartic-type endopeptidase activity; INVOLVED IN: proteolysis; EXPRESSED IN: 12 plant structures; EXPRESSED DURING: 4 anthesis, C globular stage, petal differentiation and expansion stage, E expanded cotyledon stage; CONTAINS InterPro DOMAIN/s: Peptidase aspartic (InterPro:IPR021109), Peptidase aspartic, catalytic (InterPro:…	protein_coding			-1.66036	5.0302	-4.95912	1.43e-05	0.0029468	2.76872
AT2G39350	AT2G39350.1	ABC-2 type transporter family protein; FUNCTIONS IN: ATPase activity, coupled to transmembrane movement of substances; INVOLVED IN: response to nematode; LOCATED IN: plasma membrane; EXPRESSED IN: 15 plant structures; EXPRESSED DURING: 4 anthesis, C globular stage, petal differentiation and expansion stage, E expanded cotyledon stage; CONTAINS InterPro DOMAIN/s: ATPase, AAA+ type, core (InterPro:…	protein_coding	ATP-BINDING CASSETTE G1 (ABCG1)	ATP-BINDING CASSETTE G1 (ABCG1)	-1.66487	3.94349	-6.00484	5.12e-07	0.000298446	6.02612
AT3G28345	AT3G28345.1	Encodes an ATP-binding cassette (ABC) transporter. Expressed in the vascular tissue of primary stem.	protein_coding	ATP-BINDING CASSETTE B15 (ABCB15)	MULTI-DRUG RESISTANCE 13 (MDR13);ATP-BINDING CASSETTE B15 (ABCB15)	-1.67055	2.08665	-3.67206	0.000720532	0.032838	-0.650621
AT1G53470	AT1G53470.1	mechanosensitive channel of small conductance-like 4 (MSL4); INVOLVED IN: transmembrane transport; LOCATED IN: plasma membrane, membrane; CONTAINS InterPro DOMAIN/s: Membrane protein, At2g17000, predicted (InterPro:IPR016688), Mechanosensitive ion channel MscS (InterPro:IPR006685), Like-Sm ribonucleoprotein (LSM)-related domain (InterPro:IPR010920); BEST Arabidopsis thaliana protein match is: mec…	protein_coding	MECHANOSENSITIVE CHANNEL OF SMALL CONDUCTANCE-LIKE 4 (MSL4)	MECHANOSENSITIVE CHANNEL OF SMALL CONDUCTANCE-LIKE 4 (MSL4)	-1.67895	1.62584	-4.4442	7.11e-05	0.0088896	1.59908
AT3G19580	AT3G19580.1	Encodes zinc finger protein. mRNA levels are upregulated in response to ABA, high salt, and mild dessication. The protein is localized to the nucleus and acts as a transcriptional repressor.	protein_coding	ZINC-FINGER PROTEIN 2 (ZF2)	ZINC-FINGER PROTEIN 2 (ZF2);ZINC-FINGER PROTEIN 2 (AZF2)	-1.68432	4.04263	-3.87548	0.000397031	0.0234175	-0.179615
AT1G43790	AT1G43790.1	tracheary element differentiation-related 6 (TED6); BEST Arabidopsis thaliana protein match is: tracheary element differentiation-related 7 (TAIR:AT5G48920.1); Has 61 Blast hits to 46 proteins in 10 species: Archae - 0; Bacteria - 0; Metazoa - 0; Fungi - 0; Plants - 61; Viruses - 0; Other Eukaryotes - 0 (source: NCBI BLink).	protein_coding	TRACHEARY ELEMENT DIFFERENTIATION-RELATED 6 (TED6)	TRACHEARY ELEMENT DIFFERENTIATION-RELATED 6 (TED6)	-1.68595	3.65711	-4.5256	5.53e-05	0.00739849	1.70788
AT3G27440	AT3G27440.1	One of the homologous genes predicted to encode proteins with UPRT domains (Uracil phosphoribosyltransferase). Five of these genes (At5g40870, At3g27190, At1g55810, At4g26510 and At3g27440) show a high level of identity, and are annotated as also containing a N-terminal uracil kinase (UK) domain. These genes are referred to as UKL1 (UK-like 1), UKL2, UKL3, UKL4 and UKL5, respectively.	protein_coding	URIDINE KINASE-LIKE 5 (UKL5)	URIDINE KINASE-LIKE 5 (UKL5)	-1.68681	-0.233718	-4.05825	0.000230257	0.0170808	0.524073
AT1G21410	AT1G21410.1	AtSKP2;1 is a homolog of human SKP2, the human F-box protein that recruits E2F1. Contains an F-box motif at the N-terminal region and a C-terminal Leu-rich repeat domain. Forms part of an E3-ubiquitin-ligase SCF (Skp1, cullin, F-box) complex and recruits phosphorylated AtE2Fc, a transcriptional factor that might play a role in cell division and during the transition from skotomorphogenesis to pho…	protein_coding	(SKP2A)	(SKP2A)	-1.68829	3.28698	-3.52411	0.00110301	0.0421857	-1.02437
AT1G73480	AT1G73480.1	alpha/beta-Hydrolases superfamily protein; FUNCTIONS IN: hydrolase activity; EXPRESSED IN: 25 plant structures; EXPRESSED DURING: 15 growth stages; BEST Arabidopsis thaliana protein match is: alpha/beta-Hydrolases superfamily protein (TAIR:AT1G18360.1); Has 6390 Blast hits to 6380 proteins in 1730 species: Archae - 36; Bacteria - 4672; Metazoa - 140; Fungi - 153; Plants - 452; Viruses - 63; Other…	protein_coding			-1.69358	5.10416	-5.81614	9.35e-07	0.000456794	5.49805
AT3G47295	AT3G47295.1	unknown protein; FUNCTIONS IN: molecular_function unknown; INVOLVED IN: biological_process unknown; LOCATED IN: endomembrane system; EXPRESSED IN: 22 plant structures; EXPRESSED DURING: 13 growth stages; Has 13 Blast hits to 13 proteins in 2 species: Archae - 0; Bacteria - 0; Metazoa - 0; Fungi - 0; Plants - 13; Viruses - 0; Other Eukaryotes - 0 (source: NCBI BLink).	protein_coding			-1.70172	3.32142	-4.49772	6.03e-05	0.00791349	1.61595
AT2G39050	AT2G39050.1	Encodes a nucleocytoplasmic lectin that is capable of binding carbohydrates.	protein_coding	EUONYMUS LECTIN S3 (EULS3)	EUONYMUS LECTIN S3 (EULS3); (ARATHEULS3)	-1.70235	3.56607	-5.7518	1.15e-06	0.000536152	5.41878
AT1G64210	AT1G64210.1	Leucine-rich repeat protein kinase family protein; FUNCTIONS IN: protein serine/threonine kinase activity, kinase activity, ATP binding; INVOLVED IN: transmembrane receptor protein tyrosine kinase signaling pathway, protein amino acid phosphorylation; LOCATED IN: mitochondrion; EXPRESSED IN: flower; EXPRESSED DURING: petal differentiation and expansion stage; CONTAINS InterPro DOMAIN/s: Protein k…	protein_coding			-1.70415	-1.53093	-3.42944	0.00144313	0.049756	-1.06579
AT3G56080	AT3G56080.1	S-adenosyl-L-methionine-dependent methyltransferases superfamily protein; INVOLVED IN: biological_process unknown; LOCATED IN: endomembrane system; EXPRESSED IN: 17 plant structures; EXPRESSED DURING: 9 growth stages; CONTAINS InterPro DOMAIN/s: Protein of unknown function DUF248, methyltransferase putative (InterPro:IPR004159); BEST Arabidopsis thaliana protein match is: S-adenosyl-L-methionine-…	protein_coding			-1.72894	1.70847	-3.51088	0.00114545	0.0433352	-0.920312
AT3G26550	AT3G26550.1	Cysteine/Histidine-rich C1 domain family protein; FUNCTIONS IN: zinc ion binding; EXPRESSED IN: hypocotyl, root, flower; EXPRESSED DURING: petal differentiation and expansion stage; CONTAINS InterPro DOMAIN/s: Zinc finger, RING-type (InterPro:IPR001841), DC1 (InterPro:IPR004146), Zinc finger, PHD-type (InterPro:IPR001965), C1-like (InterPro:IPR011424); BEST Arabidopsis thaliana protein match is: …	protein_coding			-1.74023	-0.301206	-5.18114	7.08e-06	0.001928	3.68465
AT1G54790	AT1G54790.2	GDSL-like Lipase/Acylhydrolase superfamily protein; FUNCTIONS IN: hydrolase activity, acting on ester bonds, carboxylesterase activity; INVOLVED IN: lipid metabolic process; LOCATED IN: endomembrane system; EXPRESSED IN: 16 plant structures; EXPRESSED DURING: 8 growth stages; CONTAINS InterPro DOMAIN/s: Lipase, GDSL (InterPro:IPR001087); BEST Arabidopsis thaliana protein match is: GDSL-like Lipas…	protein_coding			-1.75395	1.51011	-3.49525	0.00119759	0.0446638	-0.956875
AT5G44610	AT5G44610.1	Encodes a protein with seven repeated VEEKK motifs. RNAi and overexpression experiments suggest that the gene is not involved in cell division but might be consequential for cell shape of epidermal and cortical cells. The protein encoded by this gene binds to cortical microtubules and inhibits tubulin polymerization. Associates to the plasma membrane and interacts with calmodulin and phosphatidyl…	protein_coding	MICROTUBULE-ASSOCIATED PROTEIN 18 (MAP18)	PLASMA MEMBRANE ASSOCIATED CA2+-BINDING PROTEIN-2 (PCAP2);MICROTUBULE-ASSOCIATED PROTEIN 18 (MAP18)	-1.75695	1.63828	-3.88274	0.000388594	0.0233123	-0.281952
AT5G66170	AT5G66170.2	Encodes a thiosulfate sulfurtransferase/rhodanese.	protein_coding	SULFURTRANSFERASE 18 (STR18)	SULFURTRANSFERASE 18 (STR18)	-1.76686	5.07478	-6.51361	1.01e-07	7.84e-05	7.61327
AT2G22470	AT2G22470.1	Encodes arabinogalactan-protein (AGP2).	protein_coding	ARABINOGALACTAN PROTEIN 2 (AGP2)	(ATAGP2);ARABINOGALACTAN PROTEIN 2 (AGP2)	-1.82763	3.22981	-4.15909	0.000169903	0.014649	0.562567
AT4G27410	AT4G27410.3	Encodes a NAC transcription factor induced in response to dessication. It is localized to the nucleus and acts as a transcriptional activator in ABA-mediated dehydration response.	protein_coding	RESPONSIVE TO DESICCATION 26 (RD26)	RESPONSIVE TO DESICCATION 26 (RD26)	-1.83599	3.56316	-4.16579	0.000166493	0.0145056	0.686143
AT2G29620	AT2G29620.1	unknown protein; BEST Arabidopsis thaliana protein match is: unknown protein (TAIR:AT1G07330.1); Has 887 Blast hits to 750 proteins in 151 species: Archae - 2; Bacteria - 63; Metazoa - 270; Fungi - 51; Plants - 111; Viruses - 6; Other Eukaryotes - 384 (source: NCBI BLink).	protein_coding			-1.83918	1.09486	-3.43087	0.00143733	0.0497287	-1.21304
AT4G00210	AT4G00210.1	LOB domain-containing protein 31 (LBD31); CONTAINS InterPro DOMAIN/s: Lateral organ boundaries, LOB (InterPro:IPR004883); BEST Arabidopsis thaliana protein match is: LOB domain-containing protein 19 (TAIR:AT2G45410.1); Has 416 Blast hits to 414 proteins in 13 species: Archae - 0; Bacteria - 0; Metazoa - 0; Fungi - 0; Plants - 416; Viruses - 0; Other Eukaryotes - 0 (source: NCBI BLink).	protein_coding	LOB DOMAIN-CONTAINING PROTEIN 31 (LBD31)	LOB DOMAIN-CONTAINING PROTEIN 31 (LBD31)	-1.8406	-1.38485	-3.72265	0.00062195	0.03037	-0.337533
AT1G26820	AT1G26820.1	Encodes ribonuclease RNS3.	protein_coding	RIBONUCLEASE 3 (RNS3)	RIBONUCLEASE 3 (RNS3)	-1.87418	2.62608	-3.78622	0.000516438	0.0272454	-0.293679
AT5G14180	AT5G14180.1	Myzus persicae-induced lipase 1 (MPL1); FUNCTIONS IN: catalytic activity; INVOLVED IN: glycerol biosynthetic process, lipid metabolic process; LOCATED IN: endomembrane system; EXPRESSED IN: 7 plant structures; EXPRESSED DURING: L mature pollen stage, M germinated pollen stage, 4 anthesis, petal differentiation and expansion stage; CONTAINS InterPro DOMAIN/s: AB-hydrolase-associated lipase region …	protein_coding	MYZUS PERSICAE-INDUCED LIPASE 1 (MPL1)	MYZUS PERSICAE-INDUCED LIPASE 1 (MPL1)	-1.87515	2.32916	-4.32848	0.00010147	0.0111416	1.00069
AT5G66870	AT5G66870.1	Encodes LOB domain protein whose overexpression results in KNOX gene repression. Overexpression also results in plants with hyponastic leaves, downward pointing flowers and reduced apical dominance. May be involved in the transcriptional regulation of the homeobox gene BP (brevipedicellus) during lateral organ differentiation. Acts together with AS2 in proximal-distal symmetry determination.	protein_coding	ASYMMETRIC LEAVES 2-LIKE 1 (ASL1)	ASYMMETRIC LEAVES 2-LIKE 1 (ASL1);LATERAL ORGAN BOUNDARIES DOMAIN GENE 36 (LBD36)	-1.88646	-1.09277	-3.53218	0.0010779	0.041604	-0.818569
AT2G41190	AT2G41190.1	Transmembrane amino acid transporter family protein; FUNCTIONS IN: amino acid transmembrane transporter activity; INVOLVED IN: amino acid transport; LOCATED IN: plasma membrane, membrane; EXPRESSED IN: 24 plant structures; EXPRESSED DURING: 13 growth stages; CONTAINS InterPro DOMAIN/s: Amino acid transporter, transmembrane (InterPro:IPR013057); BEST Arabidopsis thaliana protein match is: Transmem…	protein_coding			-1.90686	4.65131	-6.16915	3.03e-07	0.000204975	6.54406
AT2G47180	AT2G47180.1	GolS1 is a galactinol synthase that catalyzes the formation of galactinol from UDP-galactose and myo-inositol. GolS1 transcript levels rise in response to methyl viologen, an oxidative damage-inducing agent. Plants over-expressing GolS1 have increased tolerance to salt, chilling, and high-light stress.	protein_coding	GALACTINOL SYNTHASE 1 (GolS1)	GALACTINOL SYNTHASE 1 (AtGolS1);GALACTINOL SYNTHASE 1 (GolS1)	-1.92962	3.3564	-3.85341	0.000423785	0.0244305	-0.133738
AT1G06570	AT1G06570.1	Mutation of the PDS1 locus disrupts the activity of p-hydroxyphenylpyruvate dioxygenase (HPPDase), the first committed step in the synthesis of both plastoquinone and tocopherols in plants.	protein_coding	PHYTOENE DESATURATION 1 (PDS1)	4-HYDROXYPHENYLPYRUVATE DIOXYGENASE (HPPD);PHYTOENE DESATURATION 1 (PDS1);4-HYDROXYPHENYLPYRUVATE DIOXYGENASE (HPD)	-1.9325	6.81744	-4.41795	7.71e-05	0.00917133	1.13245
AT3G11410	AT3G11410.1	Encodes protein phosphatase 2C. Negative regulator of ABA signalling. Expressed in seeds during germination. mRNA up-regulated by drought and ABA.	protein_coding	PROTEIN PHOSPHATASE 2CA (PP2CA)	PROTEIN PHOSPHATASE 2CA (PP2CA);ARABIDOPSIS THALIANA PROTEIN PHOSPHATASE 2CA (ATPP2CA); (AHG3)	-1.93396	5.59737	-6.83901	3.58e-08	4.18e-05	8.69978
AT5G57050	AT5G57050.1	Encodes a protein phosphatase 2C and is involved in ABA signal transduction. Binds fibrillin preprotein in vitro and in vivo.	protein_coding	ABA INSENSITIVE 2 (ABI2)	(AtABI2);ABA INSENSITIVE 2 (ABI2)	-1.93939	3.67712	-5.48804	2.67e-06	0.00102139	4.59972
AT1G05310	AT1G05310.1	Pectin lyase-like superfamily protein; FUNCTIONS IN: pectinesterase activity; INVOLVED IN: cell wall modification; LOCATED IN: endomembrane system, cell wall, plant-type cell wall; EXPRESSED IN: 12 plant structures; EXPRESSED DURING: 6 growth stages; CONTAINS InterPro DOMAIN/s: Pectinesterase, active site (InterPro:IPR018040), Pectin lyase fold/virulence factor (InterPro:IPR011050), Pectinesteras…	protein_coding			-1.98396	2.11877	-4.76264	2.65e-05	0.00447888	2.50417
AT4G16690	AT4G16690.1	Encodes a protein shown to have carboxylesterase activity, methyl IAA esterase activity, and methyl jasmonate esterase activity in vitro. This protein does not act on MeSA, MeGA4, or MEGA9 in vitro. Although MES16 is similar to MES17, a MeIAA hydrolase, two mes16 mutant lines (SALK_151578) and (SALK_139756) do not show altered sensitivity to MeIAA in root growth assays. MES16 transcripts appear t…	protein_coding	METHYL ESTERASE 16 (MES16)	ARABIDOPSIS THALIANA METHYL ESTERASE 16 (ATMES16);METHYL ESTERASE 16 (MES16)	-1.99518	3.46869	-5.8306	8.93e-07	0.000446533	5.56858
AT3G49070	AT3G49070.1	Protein of unknown function (DUF677); INVOLVED IN: N-terminal protein myristoylation; EXPRESSED IN: 13 plant structures; EXPRESSED DURING: LP.04 four leaves visible, 4 anthesis, LP.10 ten leaves visible, petal differentiation and expansion stage, D bilateral stage; CONTAINS InterPro DOMAIN/s: Protein of unknown function DUF677 (InterPro:IPR007749); BEST Arabidopsis thaliana protein match is: Prot…	protein_coding			-2.00971	1.0477	-4.10324	0.000201113	0.0161792	0.661623
AT1G64625	AT1G64625.1	Serine/threonine-protein kinase WNK (With No Lysine)-related; BEST Arabidopsis thaliana protein match is: transcription factor-related (TAIR:AT2G27230.2); Has 35333 Blast hits to 34131 proteins in 2444 species: Archae - 798; Bacteria - 22429; Metazoa - 974; Fungi - 991; Plants - 531; Viruses - 0; Other Eukaryotes - 9610 (source: NCBI BLink).	protein_coding			-2.01571	0.0512974	-3.71118	0.000643087	0.0309699	-0.395078
AT1G55180	AT1G55180.1	member of C2-PLD. subfamily Represents a phospholipase D (PLD) gene with four exons, hence it is a member of the alpha class. Its amino acid sequence is quite different from other PLDs, therefore it might possess unique structural and/or catalytic properties.	protein_coding	PHOSPHOLIPASE D ALPHA 4 (PLDEPSILON)	PHOSPHOLIPASE D ALPHA 4 (PLDEPSILON); (PLDALPHA4)	-2.02349	1.04529	-4.24977	0.000129026	0.0123888	1.06128
AT4G02280	AT4G02280.1	Encodes a protein with sucrose synthase activity (SUS3). It appears to be important for sucrose metabolism in developing seeds, especially during the late maturation phase, about 18 days after flowering.	protein_coding	SUCROSE SYNTHASE 3 (SUS3)	SUCROSE SYNTHASE 3 (SUS3); (ATSUS3)	-2.02894	3.79455	-4.20765	0.000146652	0.013388	0.699843
AT5G43980	AT5G43980.1	Encodes a plasmodesmal protein that affects the intercellular movement of molecules through the plasmodesmata. The cytoplasmic C-terminal portion of the protein is connected to the apoplastic N-terminal portion of the protein by a single transmembrane domain (TMD). It is transported to the plasmodesmata through the secretory pathway. PDLP1 has two DUF26 domains and a signal peptide, but the prope…	protein_coding	PLASMODESMATA-LOCATED PROTEIN 1 (PDLP1)	PLASMODESMATA-LOCATED PROTEIN 1 (PDLP1);PLASMODESMATA-LOCATED PROTEIN 1A (PDLP1A)	-2.03631	0.899981	-3.4728	0.00127646	0.0460379	-0.962112
AT4G18425	AT4G18425.1	Protein of unknown function (DUF679); CONTAINS InterPro DOMAIN/s: Protein of unknown function DUF679 (InterPro:IPR007770); BEST Arabidopsis thaliana protein match is: Protein of unknown function (DUF679) (TAIR:AT5G46090.1); Has 30201 Blast hits to 17322 proteins in 780 species: Archae - 12; Bacteria - 1396; Metazoa - 17338; Fungi - 3422; Plants - 5037; Viruses - 0; Other Eukaryotes - 2996 (source…	protein_coding			-2.04509	0.957222	-3.48362	0.00123785	0.0457832	-0.959446
AT1G29395	AT1G29395.1	Integral membrane protein in the inner envelope of chloroplasts. Provide freezing tolerance. Expression is induced by short-term cold-treatment, water deprivation, and abscisic acid treatment.	protein_coding	COLD REGULATED 314 INNER MEMBRANE 1 (COR413IM1)	COLD REGULATED 314 THYLAKOID MEMBRANE 1 (COR413-TM1);COLD REGULATED 414 THYLAKOID MEMBRANE 1 (COR414-TM1);COLD REGULATED 314 INNER MEMBRANE 1 (COR413IM1)	-2.04782	5.20068	-3.69507	0.000673969	0.0317294	-0.692613
AT1G79520	AT1G79520.2	Cation efflux family protein; FUNCTIONS IN: cation transmembrane transporter activity; INVOLVED IN: cation transport, transmembrane transport; LOCATED IN: membrane; EXPRESSED IN: 18 plant structures; EXPRESSED DURING: 10 growth stages; CONTAINS InterPro DOMAIN/s: Cation efflux protein (InterPro:IPR002524); BEST Arabidopsis thaliana protein match is: Cation efflux family protein (TAIR:AT1G16310.1).	protein_coding			-2.05512	2.97452	-4.29157	0.000113588	0.0118001	1.16009
AT1G51140	AT1G51140.1	Encodes a basic helix?loop?helix-type transcription factor involved in photoperiodism flowering.	protein_coding	FLOWERING BHLH 3 (FBH3)	FLOWERING BHLH 3 (FBH3)	-2.0553	3.5321	-5.14957	7.82e-06	0.00202416	3.63284
AT1G61860	AT1G61860.1	Protein kinase superfamily protein; FUNCTIONS IN: protein serine/threonine kinase activity, protein kinase activity, kinase activity, ATP binding; INVOLVED IN: protein amino acid phosphorylation; LOCATED IN: cellular_component unknown; EXPRESSED IN: 12 plant structures; EXPRESSED DURING: L mature pollen stage, M germinated pollen stage, 4 anthesis, C globular stage, petal differentiation and expa…	protein_coding			-2.05795	0.199213	-4.1011	0.000202415	0.0162218	0.61823
AT5G05960	AT5G05960.1	Bifunctional inhibitor/lipid-transfer protein/seed storage 2S albumin superfamily protein; FUNCTIONS IN: lipid binding; INVOLVED IN: lipid transport; LOCATED IN: endomembrane system; EXPRESSED IN: 18 plant structures; EXPRESSED DURING: 10 growth stages; CONTAINS InterPro DOMAIN/s: Bifunctional inhibitor/plant lipid transfer protein/seed storage (InterPro:IPR016140), Plant lipid transfer protein/s…	protein_coding			-2.07663	3.03783	-3.96243	0.000306697	0.0203951	0.272153
AT2G33380	AT2G33380.1	Encodes a calcium binding protein whose mRNA is induced upon treatment with NaCl, ABA and in response to dessication. mRNA expression under drought conditions is apparent particularly in leaves and flowers. Isoform of caleosin with a role as a peroxygenase involved in oxylipin metabolism during biotic and abiotic stress.	protein_coding	RESPONSIVE TO DESSICATION 20 (RD20)	ARABIDOPSIS THALIANA CALEOSIN 3 (AtCLO3);RESPONSIVE TO DESSICATION 20 (RD20);CALEOSIN 3 (CLO-3);CALEOSIN 3 (CLO3)	-2.08379	2.10071	-4.1983	0.000150873	0.0135184	0.904135
AT5G09220	AT5G09220.1	member of AAAP family	protein_coding	AMINO ACID PERMEASE 2 (AAP2)	AMINO ACID PERMEASE 2 (AAP2)	-2.08505	5.20768	-4.14129	0.000179295	0.0150587	0.595658
AT1G69260	AT1G69260.1	ABI five binding protein (AFP1); CONTAINS InterPro DOMAIN/s: Protein of unknown function DUF1675 (InterPro:IPR012463); BEST Arabidopsis thaliana protein match is: ABI five binding protein 2 (TAIR:AT1G13740.1); Has 267 Blast hits to 267 proteins in 42 species: Archae - 0; Bacteria - 6; Metazoa - 29; Fungi - 9; Plants - 184; Viruses - 0; Other Eukaryotes - 39 (source: NCBI BLink).	protein_coding	ABI FIVE BINDING PROTEIN (AFP1)	ABI FIVE BINDING PROTEIN (AFP1)	-2.10362	1.64518	-4.61891	4.14e-05	0.00621206	2.05703
AT3G52780	AT3G52780.1	PAP20; FUNCTIONS IN: protein serine/threonine phosphatase activity, acid phosphatase activity; INVOLVED IN: biological_process unknown; LOCATED IN: endomembrane system; EXPRESSED IN: 10 plant structures; EXPRESSED DURING: 4 anthesis, petal differentiation and expansion stage; CONTAINS InterPro DOMAIN/s: Metallophosphoesterase (InterPro:IPR004843), Purple acid phosphatase-like, N-terminal (InterPr…	protein_coding	(PAP20)	(ATPAP20); (PAP20)	-2.10418	-1.916	-3.77903	0.000527445	0.0275492	-0.196229
AT4G37070	AT4G37070.2	Patatin-related phospholipase A. Expressed strongly and exclusively in roots. AtplaIVA-null mutants have reduced lateral root development. Phosphorylation by calcium-dependent protein kinases in vitro enhances its activity.	protein_coding	(PLP1)	PHOSPHOLIPASE A IVA (AtPLAIVA); (PLA IVA); (PLP1)	-2.12771	1.16831	-4.78221	2.49e-05	0.00441276	2.41796
AT1G17810	AT1G17810.1	beta-tonoplast intrinsic protein (beta-TIP) mRNA, complete	protein_coding	BETA-TONOPLAST INTRINSIC PROTEIN (BETA-TIP)	BETA-TONOPLAST INTRINSIC PROTEIN (BETA-TIP)	-2.13719	0.688109	-4.26146	0.000124511	0.0122166	0.788753
AT1G03790	AT1G03790.1	Encodes SOMNUS (SOM), a nucleus-localized CCCH-type zinc finger protein. SOM negatively regulates light-dependent seed germination downstream of PIL5 (AT2G20180).	protein_coding	SOMNUS (SOM)	SOMNUS (SOM)	-2.14804	0.326609	-5.18554	6.98e-06	0.001928	3.61377
AT5G42200	AT5G42200.1	RING/U-box superfamily protein; CONTAINS InterPro DOMAIN/s: Zinc finger, RING-type (InterPro:IPR001841), Zinc finger, C3HC4 RING-type (InterPro:IPR018957); BEST Arabidopsis thaliana protein match is: RING/U-box superfamily protein (TAIR:AT1G49220.1); Has 1807 Blast hits to 1807 proteins in 277 species: Archae - 0; Bacteria - 0; Metazoa - 736; Fungi - 347; Plants - 385; Viruses - 0; Other Eukaryot…	protein_coding			-2.21205	2.60349	-3.49811	0.00118787	0.0445387	-0.928856
AT5G57260	AT5G57260.1	putative cytochrome P450	protein_coding	"CYTOCHROME P450, FAMILY 71, SUBFAMILY B, POLYPEPTIDE 10" (CYP71B10)	"CYTOCHROME P450, FAMILY 71, SUBFAMILY B, POLYPEPTIDE 10" (CYP71B10)	-2.22132	-2.20319	-3.74753	0.000578392	0.029058	-0.28935
AT4G34320	AT4G34320.1	Protein of unknown function (DUF677); FUNCTIONS IN: molecular_function unknown; INVOLVED IN: N-terminal protein myristoylation; LOCATED IN: cellular_component unknown; EXPRESSED IN: hypocotyl, sepal, flower, carpel, stamen; EXPRESSED DURING: 4 anthesis, petal differentiation and expansion stage; CONTAINS InterPro DOMAIN/s: Protein of unknown function DUF677 (InterPro:IPR007749); BEST Arabidopsis …	protein_coding			-2.23242	-0.573778	-3.92801	0.000339775	0.0214242	0.17642
AT3G14880	AT3G14880.1	BEST Arabidopsis thaliana protein match is: transcription factor-related (TAIR:AT4G18650.1); Has 560 Blast hits to 560 proteins in 40 species: Archae - 0; Bacteria - 0; Metazoa - 2; Fungi - 0; Plants - 558; Viruses - 0; Other Eukaryotes - 0 (source: NCBI BLink).	protein_coding			-2.23315	-1.80253	-3.62704	0.000820807	0.0350294	-0.592264
AT5G46720	AT5G46720.1	AIG2-like (avirulence induced gene) family protein; CONTAINS InterPro DOMAIN/s: Butirosin biosynthesis, BtrG-like (InterPro:IPR013024), AIG2-like (InterPro:IPR009288); BEST Arabidopsis thaliana protein match is: AIG2-like (avirulence induced gene) family protein (TAIR:AT3G02910.1); Has 1807 Blast hits to 1807 proteins in 277 species: Archae - 0; Bacteria - 0; Metazoa - 736; Fungi - 347; Plants - …	protein_coding			-2.2393	-0.0676841	-3.92375	0.000344103	0.0214561	0.0871907
AT4G30420	AT4G30420.1	nodulin MtN21-like transporter family protein	protein_coding			-2.23998	-0.93876	-4.35486	9.36e-05	0.0105299	1.31754
AT2G04038	AT2G04038.1	basic leucine-zipper 48 (bZIP48); FUNCTIONS IN: DNA binding, sequence-specific DNA binding transcription factor activity; INVOLVED IN: regulation of transcription, DNA-dependent; EXPRESSED IN: male gametophyte, root, carpel; EXPRESSED DURING: 4 anthesis; CONTAINS InterPro DOMAIN/s: Basic-leucine zipper (bZIP) transcription factor (InterPro:IPR004827), bZIP transcription factor, bZIP-1 (InterPro:I…	protein_coding	BASIC LEUCINE-ZIPPER 48 (bZIP48)	BASIC LEUCINE-ZIPPER 48 (AtbZIP48);BASIC LEUCINE-ZIPPER 48 (bZIP48)	-2.24149	-1.48168	-3.56221	0.000989104	0.0393895	-0.759016
AT2G34315	AT2G34315.1	Avirulence induced gene (AIG1) family protein; FUNCTIONS IN: GTP binding; INVOLVED IN: biological_process unknown; LOCATED IN: cellular_component unknown; EXPRESSED IN: embryo, root, stamen; EXPRESSED DURING: 4 anthesis, D bilateral stage; CONTAINS InterPro DOMAIN/s: AIG1 (InterPro:IPR006703); BEST Arabidopsis thaliana protein match is: Avirulence induced gene (AIG1) family protein (TAIR:AT1G3395…	protein_coding			-2.2632	-0.69626	-3.62264	0.000831308	0.0350502	-0.591226
AT4G13290	AT4G13290.1	putative cytochrome P450	protein_coding	"CYTOCHROME P450, FAMILY 71, SUBFAMILY A, POLYPEPTIDE 19" (CYP71A19)	"CYTOCHROME P450, FAMILY 71, SUBFAMILY A, POLYPEPTIDE 19" (CYP71A19)	-2.28444	0.18574	-4.26566	0.000122929	0.0122166	1.10332
AT4G39795	AT4G39795.1	Protein of unknown function (DUF581); CONTAINS InterPro DOMAIN/s: Protein of unknown function DUF581 (InterPro:IPR007650); BEST Arabidopsis thaliana protein match is: Protein of unknown function (DUF581) (TAIR:AT1G22160.1); Has 498 Blast hits to 498 proteins in 19 species: Archae - 0; Bacteria - 0; Metazoa - 0; Fungi - 0; Plants - 498; Viruses - 0; Other Eukaryotes - 0 (source: NCBI BLink).	protein_coding			-2.29722	0.644928	-3.43817	0.00140801	0.049059	-1.04219
AT4G39720	AT4G39720.1	VQ motif-containing protein; CONTAINS InterPro DOMAIN/s: VQ (InterPro:IPR008889); BEST Arabidopsis thaliana protein match is: VQ motif-containing protein (TAIR:AT1G35830.1); Has 406 Blast hits to 390 proteins in 39 species: Archae - 0; Bacteria - 0; Metazoa - 10; Fungi - 7; Plants - 145; Viruses - 0; Other Eukaryotes - 244 (source: NCBI BLink).	protein_coding			-2.31811	0.319955	-4.2794	0.000117887	0.0120745	1.07435
AT1G60190	AT1G60190.1	Encodes PUB19, a plant U-box armadillo repeat protein. Involved in salt inhibition of germination together with PUB18.	protein_coding	PLANT U-BOX 19 (PUB19)	PLANT U-BOX 19 (PUB19); (AtPUB19)	-2.32504	2.19023	-3.65655	0.000753671	0.0336698	-0.710492
AT1G22370	AT1G22370.2	UDP-glucosyl transferase 85A5 (UGT85A5); FUNCTIONS IN: transferase activity, transferring glycosyl groups, glucuronosyltransferase activity; INVOLVED IN: metabolic process; EXPRESSED IN: 15 plant structures; EXPRESSED DURING: 9 growth stages; CONTAINS InterPro DOMAIN/s: UDP-glucuronosyl/UDP-glucosyltransferase (InterPro:IPR002213); BEST Arabidopsis thaliana protein match is: UDP-glucosyl transfer…	protein_coding	UDP-GLUCOSYL TRANSFERASE 85A5 (UGT85A5)	UDP-GLUCOSYL TRANSFERASE 85A5 (AtUGT85A5);UDP-GLUCOSYL TRANSFERASE 85A5 (UGT85A5)	-2.33369	3.83232	-5.02951	1.14e-05	0.00260973	3.28007
AT1G06080	AT1G06080.1	homologous to delta 9 acyl-lipid desaturases of cyanobacteria and acyl-CoA desaturases of yeast and mammals. expression down-regulated by cold temperature.	protein_coding	DELTA 9 DESATURASE 1 (ADS1)	DELTA 9 DESATURASE 1 (ADS1)	-2.3398	3.04155	-5.09398	9.33e-06	0.00227718	3.26494
AT4G36740	AT4G36740.1	Encodes a homeodomain leucine zipper class I (HD-Zip I) protein.	protein_coding	HOMEOBOX PROTEIN 40 (HB40)	HOMEOBOX PROTEIN 40 (HB40); (HB-5);HOMEOBOX PROTEIN 40 (ATHB40)	-2.34616	-2.38393	-3.56172	0.000990505	0.0393895	-0.790871
AT1G11190	AT1G11190.1	Encodes a bifunctional nuclease that acts on both RNA and DNA involved in nucleic acid degradation to facilitate nucleotide and phosphate recovery during senescence. It has mismatch-specific endonuclease activity with wide recognition of single base mismatches as well as the ability to cleave indel types of mismatches (heteroduplexes with loops).	protein_coding	BIFUNCTIONAL NUCLEASE I (BFN1)	BIFUNCTIONAL NUCLEASE I (BFN1);ENDONUCLEASE 1 (ENDO1)	-2.35988	1.70261	-4.30331	0.000109587	0.0116802	1.20622
AT1G06090	AT1G06090.1	Fatty acid desaturase family protein; FUNCTIONS IN: oxidoreductase activity, oxidoreductase activity, acting on paired donors, with oxidation of a pair of donors resulting in the reduction of molecular oxygen to two molecules of water; INVOLVED IN: oxidation reduction, lipid metabolic process; LOCATED IN: cellular_component unknown; CONTAINS InterPro DOMAIN/s: Fatty acid desaturase, type 1, core …	protein_coding			-2.42884	0.745272	-3.79447	0.000504081	0.0269559	-0.151904
AT4G18550	AT4G18550.1	DSEL is cytosolic acylhydrolase that shows prefential lipase activity against the sn-1 position of several classes of lipids, including 1,3-diacylglycerols and 1-monoacylglycerols. Overexpression of DSEL leads to increased peroxisome and oil body levels in cotyledons and reduced beta-oxidation activity in seedlings.	protein_coding	DAD1-LIKE SEEDING ESTABLISHMENT-RELATED LIPASE (DSEL)	ARABIDOPSIS THALIANA DAD1-LIKE SEEDING ESTABLISHMENT-RELATED LIPASE (AtDSEL);DAD1-LIKE SEEDING ESTABLISHMENT-RELATED LIPASE (DSEL)	-2.43239	1.11694	-4.1383	0.000180925	0.0150749	0.729186
AT5G57400	AT5G57400.1	unknown protein; Has 1 Blast hits to 1 proteins in 1 species: Archae - 0; Bacteria - 0; Metazoa - 0; Fungi - 0; Plants - 1; Viruses - 0; Other Eukaryotes - 0 (source: NCBI BLink).	protein_coding			-2.44599	-1.80945	-4.09028	0.000209119	0.0163838	0.527428
AT3G61897	AT3G61897.1	Encodes a microRNA that targets several HD-ZIPIII family members including PHV, PHB, REV, ATHB-8, and ATHB-15. MicroRNAs are regulatory RNAs with a mature length of ~21-nucleotides that are processed from hairpin precursors by Dicer-like enzymes. MicroRNAs can negatively regulate gene expression by attenuating translation or by directing mRNA cleavage.Mature sequence: UCGGACCAGGCUUCAUUCCCC	miRNA	MICRORNA166B (MIR166B)	MICRORNA 166 (MIR166);MICRORNA166B (MIR166B)	-2.45477	-1.33139	-4.08631	0.000211628	0.0165188	0.542881
AT2G46680	AT2G46680.1	encodes a putative transcription factor that contains a homeodomain closely linked to a leucine zipper motif. Transcript is detected in all tissues examined. Is transcriptionally regulated in an ABA-dependent manner and may act in a signal transduction pathway which mediates a drought response.	protein_coding	HOMEOBOX 7 (HB-7)	HOMEOBOX 7 (HB-7);ARABIDOPSIS THALIANA HOMEOBOX 7 (ATHB7);HOMEOBOX 7 (ATHB-7)	-2.55891	2.99474	-3.55101	0.00102136	0.0400849	-0.849113
AT1G79450	AT1G79450.1	ALA-interacting subunit 5 (ALIS5); INVOLVED IN: biological_process unknown; LOCATED IN: chloroplast thylakoid lumen, plasma membrane, membrane; EXPRESSED IN: 12 plant structures; EXPRESSED DURING: L mature pollen stage, M germinated pollen stage, 4 anthesis, petal differentiation and expansion stage; CONTAINS InterPro DOMAIN/s: Protein of unknown function DUF284, transmembrane eukaryotic (InterPr…	protein_coding	ALA-INTERACTING SUBUNIT 5 (ALIS5)	ALA-INTERACTING SUBUNIT 5 (ALIS5)	-2.56346	0.769996	-3.56613	0.000978069	0.0392703	-0.747871
AT2G44260	AT2G44260.2	Plant protein of unknown function (DUF946); CONTAINS InterPro DOMAIN/s: Protein of unknown function DUF946 (InterPro:IPR009291); BEST Arabidopsis thaliana protein match is: Plant protein of unknown function (DUF946) (TAIR:AT2G44230.1); Has 355 Blast hits to 329 proteins in 91 species: Archae - 0; Bacteria - 23; Metazoa - 15; Fungi - 113; Plants - 198; Viruses - 0; Other Eukaryotes - 6 (source: NC…	protein_coding			-2.58805	2.17068	-4.79951	2.36e-05	0.00426697	2.60193
AT3G50970	AT3G50970.1	Belongs to the dehydrin protein family, which contains highly conserved stretches of 7-17 residues that are repetitively scattered in their sequences, the K-, S-, Y- and lysine rich segments. LTI29 and LTI30 double overexpressors confer freeze tolerance. Located in membranes. mRNA upregulated by water deprivation and abscisic acid.	protein_coding	LOW TEMPERATURE-INDUCED 30 (LTI30)	(XERO2);LOW TEMPERATURE-INDUCED 30 (LTI30)	-2.59588	4.37638	-3.85269	0.000424686	0.0244305	-0.0527373
AT5G04200	AT5G04200.1	Encodes a putative metacaspase. Arabidopsis contains three type I MCP genes (MCP1a-c) and six type II MCP genes (MCP2a?f): AtMCP1a/At5g64240, AtMCP1b/At1g02170, AtMCP1c/At4g25110, AtMCP2a/At1g79310, AtMCP2b/At1g79330, AtMCP2c/At1g79320, AtMCP2d/At1g79340, AtMCP2e/At1g16420, AtMCP2f/At5g04200.	protein_coding	METACASPASE 9 (MC9)	METACASPASE 2F (AtMCP2f);METACASPASE 2F (MCP2f);METACASPASE 9 (MC9);METACASPASE 9 (AtMC9)	-2.61062	2.81767	-6.13556	3.37e-07	0.000216256	6.59018
AT4G33467	AT4G33467.1	unknown protein; Has 25 Blast hits to 25 proteins in 9 species: Archae - 0; Bacteria - 0; Metazoa - 0; Fungi - 0; Plants - 25; Viruses - 0; Other Eukaryotes - 0 (source: NCBI BLink).	protein_coding			-2.6659	1.33421	-3.92839	0.000339389	0.0214242	0.193005
AT2G46950	AT2G46950.1	member of CYP709B	protein_coding	"CYTOCHROME P450, FAMILY 709, SUBFAMILY B, POLYPEPTIDE 2" (CYP709B2)	"CYTOCHROME P450, FAMILY 709, SUBFAMILY B, POLYPEPTIDE 2" (CYP709B2)	-2.70635	-0.236618	-4.76486	2.63e-05	0.00447888	2.49075
AT5G20710	AT5G20710.1	beta-galactosidase 7 (BGAL7); FUNCTIONS IN: beta-galactosidase activity; INVOLVED IN: lactose catabolic process, using glucoside 3-dehydrogenase, carbohydrate metabolic process, lactose catabolic process via UDP-galactose, lactose catabolic process; LOCATED IN: endomembrane system; EXPRESSED IN: 12 plant structures; EXPRESSED DURING: 4 anthesis, C globular stage, F mature embryo stage, petal diff…	protein_coding	BETA-GALACTOSIDASE 7 (BGAL7)	BETA-GALACTOSIDASE 7 (BGAL7)	-2.72933	1.23186	-6.58138	8.12e-08	6.82e-05	7.91109
AT4G19810	AT4G19810.1	ChiC encodes a Class V chitinase that is a part of glycoside hydrolase family 18 based on CAZy groupings. It appears to primarily act as an exochitinase in vitro where it predominantly cleaves a chitobiose (GlcNAc)2 residue from the non-reducing end of a chitin oligosaccharide. However, it shows some minor endochitinase activity in vitro, as well. A putative 24 amino-acid signal peptide may direc…	protein_coding	CLASS V CHITINASE (ChiC)	CLASS V CHITINASE (ChiC)	-2.73656	2.03554	-3.74856	0.000576644	0.029058	-0.303597
AT3G62990	AT3G62990.1	unknown protein; FUNCTIONS IN: molecular_function unknown; INVOLVED IN: biological_process unknown; LOCATED IN: endomembrane system; BEST Arabidopsis thaliana protein match is: unknown protein (TAIR:AT2G47950.1); Has 22 Blast hits to 22 proteins in 5 species: Archae - 0; Bacteria - 0; Metazoa - 0; Fungi - 0; Plants - 22; Viruses - 0; Other Eukaryotes - 0 (source: NCBI BLink).	protein_coding			-2.73791	-1.72449	-3.9733	0.000296915	0.0201261	0.290312
AT1G56600	AT1G56600.1	GolS2 is a galactinol synthase that catalyzes the formation of galactinol from UDP-galactose and myo-inositol. GolS2 transcript levels rise in response to methyl viologen, an oxidative damage-inducing agent. Plants over-expressing GolS2 have increased tolerance to salt, chilling, and high-light stress.	protein_coding	GALACTINOL SYNTHASE 2 (GolS2)	GALACTINOL SYNTHASE 2 (GolS2);GALACTINOL SYNTHASE 2 (AtGolS2)	-2.74106	0.397858	-3.48643	0.001228	0.0455552	-0.932591
AT1G70850	AT1G70850.1	MLP-like protein 34 (MLP34); FUNCTIONS IN: molecular_function unknown; INVOLVED IN: response to biotic stimulus, defense response; LOCATED IN: cellular_component unknown; EXPRESSED IN: 6 plant structures; EXPRESSED DURING: 4 anthesis, petal differentiation and expansion stage; CONTAINS InterPro DOMAIN/s: Bet v I allergen (InterPro:IPR000916); BEST Arabidopsis thaliana protein match is: MLP-like p…	protein_coding	MLP-LIKE PROTEIN 34 (MLP34)	MLP-LIKE PROTEIN 34 (MLP34)	-2.82747	3.01801	-17.9606	1.9e-20	3.99e-16	35.9448
AT5G62480	AT5G62480.1	Encodes glutathione transferase belonging to the tau class of GSTs. Naming convention according to Wagner et al. (2002).	protein_coding	GLUTATHIONE S-TRANSFERASE TAU 9 (GSTU9)	GLUTATHIONE S-TRANSFERASE 14 (GST14);GLUTATHIONE S-TRANSFERASE TAU 9 (GSTU9);GLUTATHIONE S-TRANSFERASE TAU 9 (ATGSTU9);GLUTATHIONE S-TRANSFERASE 14B (GST14B)	-2.83346	0.800496	-4.8701	1.89e-05	0.00367271	2.75484
AT1G28650	AT1G28650.1	GDSL-like Lipase/Acylhydrolase superfamily protein; FUNCTIONS IN: hydrolase activity, acting on ester bonds, carboxylesterase activity; INVOLVED IN: lipid metabolic process; LOCATED IN: endomembrane system; EXPRESSED IN: stem; CONTAINS InterPro DOMAIN/s: Lipase, GDSL (InterPro:IPR001087); BEST Arabidopsis thaliana protein match is: GDSL-like Lipase/Acylhydrolase superfamily protein (TAIR:AT1G2867…	protein_coding			-2.84003	-2.9613	-4.00466	0.000270365	0.0188709	0.297459
AT4G13280	AT4G13280.1	Catalyzes the conversion of farnesyl diphosphate to (Z)-gamma-bisabolene and the additional minor products E-nerolidol and alpha-bisabolol. Expressed in cortex and sub-epidermal layers of roots, leaf hydathodes and flower stigmata. Induced by wounding.	protein_coding	TERPENOID SYNTHASE 12 (TPS12)	TERPENOID SYNTHASE 12 (TPS12); (ATTPS12)	-2.84925	-0.731472	-5.11063	8.85e-06	0.00221178	3.20731
AT3G21380	AT3G21380.1	Mannose-binding lectin superfamily protein; CONTAINS InterPro DOMAIN/s: Mannose-binding lectin (InterPro:IPR001229); BEST Arabidopsis thaliana protein match is: myrosinase-binding protein 1 (TAIR:AT1G52040.1); Has 1897 Blast hits to 750 proteins in 41 species: Archae - 0; Bacteria - 4; Metazoa - 0; Fungi - 0; Plants - 1886; Viruses - 0; Other Eukaryotes - 7 (source: NCBI BLink).	protein_coding			-2.85066	-2.84589	-3.9786	0.000292256	0.0201197	0.234868
AT5G55250	AT5G55250.1	Encodes an enzyme which specifically converts IAA to its methyl ester form MelIAA. This gene belongs to the family of carboxyl methyltransferases whose members catalyze the transfer of the methyl group from S-adenosyl-L-methionine to carboxylic acid-containing substrates to form small molecule methyl esters. Expression of TCP genes is downregulated in mutant iamt1-D.	protein_coding	IAA CARBOXYLMETHYLTRANSFERASE 1 (IAMT1)	IAA CARBOXYLMETHYLTRANSFERASE 1 (IAMT1); (AtIAMT1)	-2.86224	-0.0742739	-3.91259	0.000355685	0.0219674	0.0820047
AT2G23060	AT2G23060.1	Acyl-CoA N-acyltransferases (NAT) superfamily protein; FUNCTIONS IN: N-acetyltransferase activity; INVOLVED IN: metabolic process; LOCATED IN: cellular_component unknown; EXPRESSED IN: embryo, leaf whorl, flower, pedicel, seed; EXPRESSED DURING: 4 anthesis, F mature embryo stage, petal differentiation and expansion stage, E expanded cotyledon stage, D bilateral stage; CONTAINS InterPro DOMAIN/s: …	protein_coding			-2.8856	-1.60276	-4.17257	0.000163109	0.01427	0.694813
AT1G62710	AT1G62710.1	Encodes a vacuolar processing enzyme belonging to a novel group of cysteine proteases that is expressed specifically in seeds and is essential for the proper processing of storage proteins.	protein_coding	BETA VACUOLAR PROCESSING ENZYME (BETA-VPE)	(BETAVPE);BETA VACUOLAR PROCESSING ENZYME (BETA-VPE)	-2.91897	2.59957	-4.29424	0.000112666	0.0117694	1.18328
AT3G20210	AT3G20210.1	Encodes a vacuolar processing enzyme with caspase-1-like activity that is specifically expressed in inner integument of developing seeds. Mutants display abnormal seed coat development. It is speculated to be involved in cell death of limited cell layers, the purpose of which is to form a seed coat.	protein_coding	DELTA VACUOLAR PROCESSING ENZYME (DELTA-VPE)	DELTA VACUOLAR PROCESSING ENZYME (DELTA-VPE);DELTA VACUOLAR PROCESSING ENZYME (DELTAVPE)	-3.00242	-1.67873	-4.62643	4.05e-05	0.00615646	2.11111
AT4G11320	AT4G11320.1	Papain family cysteine protease; FUNCTIONS IN: cysteine-type endopeptidase activity, cysteine-type peptidase activity; INVOLVED IN: proteolysis; LOCATED IN: endomembrane system; CONTAINS InterPro DOMAIN/s: Proteinase inhibitor I29, cathepsin propeptide (InterPro:IPR013201), Peptidase C1A, papain (InterPro:IPR013128), Peptidase C1A, papain C-terminal (InterPro:IPR000668), Peptidase, cysteine pepti…	protein_coding			-3.0485	6.73021	-8.94217	5.54e-11	2.33e-07	15.0036
AT1G71250	AT1G71250.1	GDSL-like Lipase/Acylhydrolase superfamily protein; FUNCTIONS IN: hydrolase activity, acting on ester bonds, lipase activity, carboxylesterase activity; INVOLVED IN: lipid metabolic process; LOCATED IN: endomembrane system; CONTAINS InterPro DOMAIN/s: Lipase, GDSL, active site (InterPro:IPR008265), Lipase, GDSL (InterPro:IPR001087); BEST Arabidopsis thaliana protein match is: GDSL-like Lipase/Acy…	protein_coding			-3.05325	-2.08136	-3.42633	0.00145587	0.0498823	-1.08792
AT3G14680	AT3G14680.1	putative cytochrome P450	protein_coding	"CYTOCHROME P450, FAMILY 72, SUBFAMILY A, POLYPEPTIDE 14" (CYP72A14)	"CYTOCHROME P450, FAMILY 72, SUBFAMILY A, POLYPEPTIDE 14" (CYP72A14)	-3.08538	0.815853	-4.5486	5.15e-05	0.00711671	1.88089
AT1G72290	AT1G72290.1	Kunitz family trypsin and protease inhibitor protein; FUNCTIONS IN: endopeptidase inhibitor activity; INVOLVED IN: biological_process unknown; LOCATED IN: endomembrane system; EXPRESSED IN: 7 plant structures; EXPRESSED DURING: 4 anthesis, C globular stage, petal differentiation and expansion stage; CONTAINS InterPro DOMAIN/s: Proteinase inhibitor I3, Kunitz legume (InterPro:IPR002160), Kunitz in…	protein_coding			-3.09221	-2.68296	-4.20607	0.000147355	0.013394	0.872866
AT2G21720	AT2G21720.1	Plant protein of unknown function (DUF639); CONTAINS InterPro DOMAIN/s: Protein of unknown function DUF639 (InterPro:IPR006927); BEST Arabidopsis thaliana protein match is: Plant protein of unknown function (DUF639) (TAIR:AT5G23390.1); Has 146 Blast hits to 143 proteins in 14 species: Archae - 0; Bacteria - 4; Metazoa - 0; Fungi - 0; Plants - 142; Viruses - 0; Other Eukaryotes - 0 (source: NCBI B…	protein_coding			-3.15398	-1.85695	-4.15201	0.000173579	0.0148761	0.767369
AT1G64940	AT1G64940.1	member of CYP89A	protein_coding	"CYTOCHROME P450, FAMILY 87, SUBFAMILY A, POLYPEPTIDE 6" (CYP89A6)	"CYTOCHROME P450, FAMILY 87, SUBFAMILY A, POLYPEPTIDE 6" (CYP89A6)	-3.15881	-1.41971	-4.097	0.00020493	0.0162374	0.5144
AT5G50360	AT5G50360.1	unknown protein; BEST Arabidopsis thaliana protein match is: unknown protein (TAIR:AT3G48510.1); Has 1807 Blast hits to 1807 proteins in 277 species: Archae - 0; Bacteria - 0; Metazoa - 736; Fungi - 347; Plants - 385; Viruses - 0; Other Eukaryotes - 339 (source: NCBI BLink).	protein_coding			-3.17169	-0.886785	-5.03403	1.13e-05	0.00260695	3.21507
AT3G03620	AT3G03620.1	MATE efflux family protein; FUNCTIONS IN: antiporter activity, drug transmembrane transporter activity, transporter activity; INVOLVED IN: drug transmembrane transport, transmembrane transport; LOCATED IN: membrane; EXPRESSED IN: 10 plant structures; EXPRESSED DURING: LP.04 four leaves visible, 4 anthesis, LP.10 ten leaves visible, petal differentiation and expansion stage; CONTAINS InterPro DOMA…	protein_coding			-3.20701	-2.0668	-4.02026	0.000258039	0.0184287	0.380477
AT3G27250	AT3G27250.1	unknown protein; BEST Arabidopsis thaliana protein match is: unknown protein (TAIR:AT5G40800.1); Has 104 Blast hits to 104 proteins in 13 species: Archae - 0; Bacteria - 0; Metazoa - 0; Fungi - 0; Plants - 104; Viruses - 0; Other Eukaryotes - 0 (source: NCBI BLink).	protein_coding			-3.20862	-0.173413	-3.76544	0.000548868	0.0280036	-0.280802
AT1G36340	AT1G36340.1	ubiquitin-conjugating enzyme 31 (UBC31); FUNCTIONS IN: ubiquitin-protein ligase activity, small conjugating protein ligase activity; INVOLVED IN: regulation of protein metabolic process, post-translational protein modification; LOCATED IN: vacuole; EXPRESSED IN: pedicel; EXPRESSED DURING: 4 anthesis; CONTAINS InterPro DOMAIN/s: Ubiquitin-conjugating enzyme/RWD-like (InterPro:IPR016135), Ubiquitin…	protein_coding	UBIQUITIN-CONJUGATING ENZYME 31 (UBC31)	UBIQUITIN-CONJUGATING ENZYME 31 (UBC31)	-3.24156	-2.33423	-3.80998	0.000481629	0.0263353	-0.186284
AT4G10180	AT4G10180.1	Encodes a nuclear-localized protein that acts as a repressor of photomorphogenesis and may be involved in chromatin remodeling.	protein_coding	DE-ETIOLATED 1 (DET1)	(ATDET1);DE-ETIOLATED 1 (DET1);FUSCA 2 (FUS2)	-3.27641	0.421155	-5.59822	1.85e-06	0.000801252	4.84092
AT5G05220	AT5G05220.1	unknown protein; Has 30201 Blast hits to 17322 proteins in 780 species: Archae - 12; Bacteria - 1396; Metazoa - 17338; Fungi - 3422; Plants - 5037; Viruses - 0; Other Eukaryotes - 2996 (source: NCBI BLink).	protein_coding			-3.30199	-1.16784	-4.76016	2.67e-05	0.00447888	2.38813
AT1G09530	AT1G09530.1	Transcription factor interacting with photoreceptors phyA and phyB. Forms a ternary complex in vitro with G-box element of the promoters of LHY, CCA1. Acts as a negative regulator of phyB signalling. It degrades rapidly after irradiation of dark grown seedlings in a process controlled by phytochromes. Does not play a significant role in controlling light input and function of the circadian clockw…	protein_coding	PHYTOCHROME INTERACTING FACTOR 3 (PIF3)	PHYTOCHROME INTERACTING FACTOR 3 (PIF3);PHOTOCURRENT 1 (POC1);PHYTOCHROME-ASSOCIATED PROTEIN 3 (PAP3);PURPLE ACID PHOSPHATASE 3 (PAP3)	-3.32154	2.36696	-10.2533	5.48e-15	1.18e-10	18.8537
AT3G53040	AT3G53040.1	late embryogenesis abundant protein, putative / LEA protein, putative; INVOLVED IN: embryo development ending in seed dormancy; EXPRESSED IN: seed; CONTAINS InterPro DOMAIN/s: Late embryogenesis abundant protein, group 4 (InterPro:IPR004238); BEST Arabidopsis thaliana protein match is: embryonic cell protein 63 (TAIR:AT2G36640.1); Has 58153 Blast hits to 33178 proteins in 2866 species: Archae - 7…	protein_coding			-3.35146	-0.994711	-4.74471	2.8e-05	0.00466324	2.38233
AT5G65165	AT5G65165.1	One of three isoforms of the iron-sulfur component of the succinate dehydrogenase complex, a component of the mitochondrial respiratory chain complex II. The product of the nuclear encoded gene is imported into the mitochondrion. Transcripts appear during seed maturation, persist through dessication, are abundant in dry seeds, and markedly decline during germination.	protein_coding	SUCCINATE DEHYDROGENASE 2-3 (SDH2-3)	SUCCINATE DEHYDROGENASE 2-3 (SDH2-3)	-3.37834	-2.6017	-3.43347	0.00142684	0.0495195	-1.07616
AT3G24310	AT3G24310.1	snapdragon myb protein 305 homolog (myb)	protein_coding	MYB DOMAIN PROTEIN 305 (MYB305)	MYB DOMAIN PROTEIN 305 (MYB305);MYB DOMAIN PROTEIN 71 (ATMYB71)	-3.38235	-1.43854	-4.11036	0.00019684	0.0159951	0.575044
AT4G17970	AT4G17970.1	Anion transporter involved in stomatal closure. Gene has 3 splicing variants.	protein_coding	"ALUMINUM-ACTIVATED, MALATE TRANSPORTER 12" (ALMT12)	(ATALMT12);"ALUMINUM-ACTIVATED, MALATE TRANSPORTER 12" (ALMT12)	-3.44567	0.318823	-5.18824	6.92e-06	0.001928	3.38197
AT1G13130	AT1G13130.1	Cellulase (glycosyl hydrolase family 5) protein; FUNCTIONS IN: cation binding, hydrolase activity, hydrolyzing O-glycosyl compounds, catalytic activity; INVOLVED IN: carbohydrate metabolic process; LOCATED IN: endomembrane system; EXPRESSED IN: 8 plant structures; EXPRESSED DURING: 4 anthesis, C globular stage, F mature embryo stage, petal differentiation and expansion stage, E expanded cotyledon…	protein_coding			-3.46909	-0.425877	-4.3632	9.12e-05	0.0104207	1.30245
AT4G25580	AT4G25580.1	CAP160 protein; CONTAINS InterPro DOMAIN/s: CAP160 (InterPro:IPR012418); BEST Arabidopsis thaliana protein match is: CAP160 protein (TAIR:AT5G52300.1); Has 292 Blast hits to 249 proteins in 85 species: Archae - 0; Bacteria - 26; Metazoa - 66; Fungi - 33; Plants - 116; Viruses - 9; Other Eukaryotes - 42 (source: NCBI BLink).	protein_coding			-3.47646	2.2963	-7.3828	6.46e-09	1.17e-05	10.3712
AT3G07250	AT3G07250.1	nuclear transport factor 2 (NTF2) family protein / RNA recognition motif (RRM)-containing protein; FUNCTIONS IN: RNA binding, nucleotide binding, nucleic acid binding; INVOLVED IN: transport, nucleocytoplasmic transport; LOCATED IN: intracellular; EXPRESSED IN: flower, leaf; EXPRESSED DURING: petal differentiation and expansion stage; CONTAINS InterPro DOMAIN/s: Nuclear transport factor 2 (InterP…	protein_coding			-3.47834	-1.95226	-4.81102	2.27e-05	0.0041516	2.4192
AT2G16005	AT2G16005.1	MD-2-related lipid recognition domain-containing protein; FUNCTIONS IN: molecular_function unknown; INVOLVED IN: biological_process unknown; LOCATED IN: endomembrane system; EXPRESSED IN: root; CONTAINS InterPro DOMAIN/s: MD-2-related lipid-recognition (InterPro:IPR003172); BEST Arabidopsis thaliana protein match is: MD-2-related lipid recognition domain-containing protein (TAIR:AT3G44100.1); Has…	protein_coding			-3.50147	0.0194882	-3.68568	0.000692608	0.0322375	-0.538192
AT3G53980	AT3G53980.1	Bifunctional inhibitor/lipid-transfer protein/seed storage 2S albumin superfamily protein; FUNCTIONS IN: lipid binding; INVOLVED IN: lipid transport; LOCATED IN: endomembrane system; EXPRESSED IN: 10 plant structures; EXPRESSED DURING: 7 growth stages; CONTAINS InterPro DOMAIN/s: Bifunctional inhibitor/plant lipid transfer protein/seed storage (InterPro:IPR016140), Plant lipid transfer protein/se…	protein_coding			-3.53096	2.16969	-4.0832	0.000213623	0.0165514	0.573599
AT4G21020	AT4G21020.1	Late embryogenesis abundant protein (LEA) family protein; BEST Arabidopsis thaliana protein match is: Late embryogenesis abundant protein (LEA) family protein (TAIR:AT5G44310.2); Has 25029 Blast hits to 12516 proteins in 1815 species: Archae - 109; Bacteria - 7990; Metazoa - 4935; Fungi - 1662; Plants - 2602; Viruses - 153; Other Eukaryotes - 7578 (source: NCBI BLink).	protein_coding			-3.55514	-2.10194	-4.20135	0.000149483	0.0134708	0.827534
AT3G15534	AT3G15534.1	unknown protein; FUNCTIONS IN: molecular_function unknown; INVOLVED IN: biological_process unknown; LOCATED IN: cellular_component unknown; BEST Arabidopsis thaliana protein match is: unknown protein (TAIR:AT1G52855.1); Has 30201 Blast hits to 17322 proteins in 780 species: Archae - 12; Bacteria - 1396; Metazoa - 17338; Fungi - 3422; Plants - 5037; Viruses - 0; Other Eukaryotes - 2996 (source: NC…	protein_coding			-3.56594	-2.12005	-4.40492	8.03e-05	0.00941148	1.30015
AT4G28530	AT4G28530.1	NAC domain containing protein 74 (NAC074); FUNCTIONS IN: sequence-specific DNA binding transcription factor activity; INVOLVED IN: multicellular organismal development, regulation of transcription; LOCATED IN: cellular_component unknown; EXPRESSED IN: 18 plant structures; EXPRESSED DURING: 13 growth stages; CONTAINS InterPro DOMAIN/s: No apical meristem (NAM) protein (InterPro:IPR003441); BEST Ar…	protein_coding	NAC DOMAIN CONTAINING PROTEIN 74 (NAC074)	NAC DOMAIN CONTAINING PROTEIN 74 (NAC074);NAC DOMAIN CONTAINING PROTEIN 74 (anac074)	-3.59875	-0.842433	-4.54405	5.23e-05	0.00712404	1.74929
AT1G72100	AT1G72100.1	late embryogenesis abundant domain-containing protein / LEA domain-containing protein; INVOLVED IN: embryo development ending in seed dormancy; LOCATED IN: endomembrane system; EXPRESSED IN: sperm cell; CONTAINS InterPro DOMAIN/s: Late embryogenesis abundant protein, group 4 (InterPro:IPR004238); BEST Arabidopsis thaliana protein match is: Late embryogenesis abundant protein (LEA) family protein …	protein_coding			-3.63516	-1.38671	-4.13069	0.00018513	0.0152439	0.723311
AT1G27990	AT1G27990.1	unknown protein; BEST Arabidopsis thaliana protein match is: unknown protein (TAIR:AT5G52420.1); Has 86 Blast hits to 86 proteins in 15 species: Archae - 0; Bacteria - 0; Metazoa - 0; Fungi - 0; Plants - 84; Viruses - 0; Other Eukaryotes - 2 (source: NCBI BLink).	protein_coding			-3.64408	-2.47633	-3.53011	0.00108428	0.0417315	-0.847771
AT5G63350	AT5G63350.1	unknown protein; BEST Arabidopsis thaliana protein match is: unknown protein (TAIR:AT3G48510.1); Has 103 Blast hits to 102 proteins in 13 species: Archae - 0; Bacteria - 0; Metazoa - 2; Fungi - 0; Plants - 101; Viruses - 0; Other Eukaryotes - 0 (source: NCBI BLink).	protein_coding			-3.64901	0.385667	-5.3679	3.91e-06	0.00132431	4.17659
AT4G16160	AT4G16160.2	Homologous to pea OEP16 and barley pPORA (OEP16), a member of Arabidopsis OEP16 family. Two OEP16 genes are closely related to each other and are conserved in all land plants, OEP16-2, also named OEP16-S, and OEP16-1 (renamed OEP16-L) are result of the gene duplication event that occurred prior to divergence of bryophytes and seed plants. Predominantly expressed in seed and is not inducible by co…	protein_coding	(ATOEP16-2)	(ATOEP16-S); (ATOEP16-2)	-3.66698	-2.14216	-4.17298	0.000162906	0.01427	0.717584
AT2G36640	AT2G36640.1	Encodes putative phosphotyrosine protein belonging to late embryogenesis abundant (LEA) protein in group 3 that might be involved in maturation and desiccation tolerance of seeds. RFLP and CAPS mapping place it on chromosome 4 but the nucleotide sequence maps it to chromosome 2.	protein_coding	EMBRYONIC CELL PROTEIN 63 (ECP63)	EMBRYONIC CELL PROTEIN 63 (ECP63);EMBRYONIC CELL PROTEIN 63 (ATECP63)	-3.70761	-1.58605	-3.90763	0.000360965	0.0221688	0.0975981
AT5G07330	AT5G07330.1	unknown protein; FUNCTIONS IN: molecular_function unknown; INVOLVED IN: biological_process unknown; LOCATED IN: mitochondrion; BEST Arabidopsis thaliana protein match is: unknown protein (TAIR:AT1G63060.1); Has 1807 Blast hits to 1807 proteins in 277 species: Archae - 0; Bacteria - 0; Metazoa - 736; Fungi - 347; Plants - 385; Viruses - 0; Other Eukaryotes - 339 (source: NCBI BLink).	protein_coding			-3.7674	-1.16375	-5.33997	4.27e-06	0.00142439	3.98503
AT1G10480	AT1G10480.1	Encodes a zinc finger protein containing only a single zinc finger.	protein_coding	ZINC FINGER PROTEIN 5 (ZFP5)	ZINC FINGER PROTEIN 5 (ZFP5)	-3.79657	-0.683558	-4.10556	0.000199707	0.0161279	0.623778
AT1G17030	AT1G17030.1	unknown protein; FUNCTIONS IN: molecular_function unknown; INVOLVED IN: biological_process unknown; LOCATED IN: endomembrane system; BEST Arabidopsis thaliana protein match is: unknown protein (TAIR:AT2G47010.2); Has 70 Blast hits to 70 proteins in 13 species: Archae - 0; Bacteria - 0; Metazoa - 0; Fungi - 0; Plants - 69; Viruses - 0; Other Eukaryotes - 1 (source: NCBI BLink).	protein_coding			-3.81538	-0.112983	-4.98942	1.3e-05	0.00280894	2.87789
AT5G01300	AT5G01300.1	PEBP (phosphatidylethanolamine-binding protein) family protein; FUNCTIONS IN: phosphatidylethanolamine binding; INVOLVED IN: biological_process unknown; LOCATED IN: cellular_component unknown; EXPRESSED IN: 7 plant structures; EXPRESSED DURING: LP.04 four leaves visible, 4 anthesis, 4 leaf senescence stage, petal differentiation and expansion stage, LP.08 eight leaves visible; CONTAINS InterPro D…	protein_coding			-3.82199	-1.30238	-4.4189	7.69e-05	0.00917133	1.43758
AT2G47770	AT2G47770.1	Encodes a membrane-bound protein designated AtTSPO (Arabidopsis thaliana TSPO-related). AtTSPO is related to the bacterial outer membrane tryptophan-rich sensory protein (TspO) and the mammalian mitochondrial 18 kDa Translocator Protein (18 kDa TSPO), members of the TspO/MBR domain-containing membrane proteins. Mainly detected in dry seeds, but can be induced in vegetative tissues by osmotic or s…	protein_coding	TSPO(OUTER MEMBRANE TRYPTOPHAN-RICH SENSORY PROTEIN)-RELATED (TSPO)	TSPO(OUTER MEMBRANE TRYPTOPHAN-RICH SENSORY PROTEIN)-RELATED (ATTSPO);TSPO(OUTER MEMBRANE TRYPTOPHAN-RICH SENSORY PROTEIN)-RELATED (TSPO)	-3.86002	0.17237	-5.61684	1.77e-06	0.000773542	4.98189
AT4G21650	AT4G21650.1	Subtilase family protein; FUNCTIONS IN: identical protein binding, serine-type endopeptidase activity; INVOLVED IN: proteolysis, negative regulation of catalytic activity; LOCATED IN: plant-type cell wall; EXPRESSED IN: 22 plant structures; EXPRESSED DURING: 13 growth stages; CONTAINS InterPro DOMAIN/s: Protease-associated PA (InterPro:IPR003137), Proteinase inhibitor, propeptide (InterPro:IPR009…	protein_coding			-3.96559	1.82798	-3.54078	0.00105171	0.0409699	-0.810141
AT5G53870	AT5G53870.1	early nodulin-like protein 1 (ENODL1); FUNCTIONS IN: electron carrier activity, copper ion binding; LOCATED IN: plasma membrane, anchored to membrane; EXPRESSED IN: 22 plant structures; EXPRESSED DURING: 9 growth stages; CONTAINS InterPro DOMAIN/s: Plastocyanin-like (InterPro:IPR003245), Cupredoxin (InterPro:IPR008972); BEST Arabidopsis thaliana protein match is: early nodulin-like protein 2 (TAI…	protein_coding	EARLY NODULIN-LIKE PROTEIN 1 (ENODL1)	(AtENODL1);EARLY NODULIN-LIKE PROTEIN 1 (ENODL1)	-4.04343	1.11401	-4.27114	0.000120894	0.0122039	1.11835
AT4G01970	AT4G01970.1	Encodes a putative stachyose synthetase or raffinose synthase.	protein_coding	STACHYOSE SYNTHASE (STS)	RAFFINOSE SYNTHASE 4 (RS4);STACHYOSE SYNTHASE (STS);STACHYOSE SYNTHASE (AtSTS)	-4.11342	-0.694071	-3.89236	0.000377675	0.0229192	0.0561418
AT1G07430	AT1G07430.1	highly ABA-induced PP2C gene 2 (HAI2); FUNCTIONS IN: protein serine/threonine phosphatase activity, catalytic activity; INVOLVED IN: protein amino acid dephosphorylation; LOCATED IN: protein serine/threonine phosphatase complex; EXPRESSED IN: 17 plant structures; EXPRESSED DURING: 9 growth stages; CONTAINS InterPro DOMAIN/s: Protein phosphatase 2C, manganese/magnesium aspartate binding site (Inte…	protein_coding	HIGHLY ABA-INDUCED PP2C GENE 2 (HAI2)	(ATAIP1);HIGHLY ABA-INDUCED PP2C GENE 2 (HAI2);AKT1 INTERACTING PROTEIN PHOSPHATASE 1 (AIP1)	-4.17273	0.373998	-5.12862	8.36e-06	0.00211451	3.37913
AT3G51810	AT3G51810.1	Encodes a ABA-inducible protein that accumulates during seed maturation, in parallel with its corresponding mRNA but with a 3 d delay. During germination, AtEm1 protein undergoes two successive cleavages before being degraded. Both proteins are more stable than the corresponding mRNA. The gene can be activated by the basic leucine zipper transcription factor ABI5. Expressed predominantly in prova…	protein_coding	LATE EMBRYOGENESIS ABUNDANT 1 (EM1)	ARABIDOPSIS THALIANA LATE EMBRYOGENESIS ABUNDANT 1 (ATEM1);LATE EMBRYOGENESIS ABUNDANT 1 (EM1); (AT3);GUANINE NUCLEOTIDE EXCHANGE FACTOR FOR ADP RIBOSYLATION FACTORS 1 (GEA1)	-4.19627	-1.85896	-3.63046	0.000812734	0.0348977	-0.587817
AT5G59220	AT5G59220.1	highly ABA-induced PP2C gene 1 (HAI1); FUNCTIONS IN: protein serine/threonine phosphatase activity, catalytic activity; INVOLVED IN: response to water deprivation, response to abscisic acid stimulus; LOCATED IN: chloroplast; EXPRESSED IN: 18 plant structures; EXPRESSED DURING: 11 growth stages; CONTAINS InterPro DOMAIN/s: Protein phosphatase 2C-related (InterPro:IPR001932), Protein phosphatase 2C…	protein_coding	HIGHLY ABA-INDUCED PP2C GENE 1 (HAI1)	HIGHLY ABA-INDUCED PP2C GENE 1 (HAI1);SENESCENCE ASSOCIATED GENE 113 (SAG113)	-4.23066	2.53054	-4.42031	7.66e-05	0.00917133	1.53374
AT3G54940	AT3G54940.2	Papain family cysteine protease; FUNCTIONS IN: cysteine-type endopeptidase activity, cysteine-type peptidase activity; INVOLVED IN: proteolysis; LOCATED IN: endomembrane system; EXPRESSED IN: embryo, sepal, carpel; EXPRESSED DURING: 4 anthesis, C globular stage; CONTAINS InterPro DOMAIN/s: Peptidase C1A, papain (InterPro:IPR013128), Proteinase inhibitor I29, cathepsin propeptide (InterPro:IPR0132…	protein_coding			-4.23385	-1.39761	-3.8722	0.0004009	0.0235131	0.0491665
AT2G01530	AT2G01530.1	MLP-like protein 329 (MLP329); FUNCTIONS IN: copper ion binding; INVOLVED IN: response to biotic stimulus, defense response; LOCATED IN: cellular_component unknown; EXPRESSED IN: hypocotyl, root; CONTAINS InterPro DOMAIN/s: Bet v I allergen (InterPro:IPR000916); BEST Arabidopsis thaliana protein match is: MLP-like protein 328 (TAIR:AT2G01520.1); Has 358 Blast hits to 331 proteins in 39 species: A…	protein_coding	MLP-LIKE PROTEIN 329 (MLP329)	(ZUSAMMEN-CA)-ENHANCED 2 (ZCE2);MLP-LIKE PROTEIN 329 (MLP329)	-4.24989	1.77942	-4.86236	1.94e-05	0.00372864	2.7925
AT1G55240	AT1G55240.1	Family of unknown function (DUF716) ; FUNCTIONS IN: molecular_function unknown; INVOLVED IN: biological_process unknown; LOCATED IN: endomembrane system; EXPRESSED IN: hypocotyl, root, flower; EXPRESSED DURING: 4 anthesis; CONTAINS InterPro DOMAIN/s: Protein of unknown function DUF716 (InterPro:IPR006904); BEST Arabidopsis thaliana protein match is: Family of unknown function (DUF716) (TAIR:AT1G5…	protein_coding			-4.25094	0.422455	-5.08021	9.74e-06	0.00229836	3.42633
AT3G48510	AT3G48510.1	unknown protein; BEST Arabidopsis thaliana protein match is: unknown protein (TAIR:AT5G63350.1); Has 98 Blast hits to 98 proteins in 11 species: Archae - 0; Bacteria - 0; Metazoa - 0; Fungi - 0; Plants - 98; Viruses - 0; Other Eukaryotes - 0 (source: NCBI BLink).	protein_coding			-4.26618	-1.50654	-5.48706	2.68e-06	0.00102139	4.13558
AT5G66400	AT5G66400.1	Belongs to the dehydrin protein family, which contains highly conserved stretches of 7-17 residues that are repetitively scattered in their sequences, the K-, S-, Y- and lysine rich segments. ABA- and drought-induced glycine-rice dehydrin protein. The ABA-induced expression of RAB18 was reduced following ACC application, indicating that ethylene inhibits the ABA signaling pathway. RAB18 is also e…	protein_coding	RESPONSIVE TO ABA 18 (RAB18)	RESPONSIVE TO ABA 18 (RAB18);ARABIDOPSIS THALIANA DROUGHT-INDUCED 8 (ATDI8)	-4.33898	3.60382	-4.65399	3.71e-05	0.0057761	2.16196
AT5G52300	AT5G52300.1	encodes a protein that is induced in expression in response to water deprivation such as cold, high-salt, and dessication. The response appears to be via abscisic acid. The promoter region contains two ABA-responsive elements (ABREs) that are required for the dehydration-responsive expression of rd29B as cis-acting elements. Protein is a member of a gene family with other members found plants, an…	protein_coding	LOW-TEMPERATURE-INDUCED 65 (LTI65)	RESPONSIVE TO DESSICATION 29B (RD29B);LOW-TEMPERATURE-INDUCED 65 (LTI65)	-4.34997	2.02249	-7.64218	2.88e-09	7.55e-06	11.0893
AT3G58450	AT3G58450.1	Adenine nucleotide alpha hydrolases-like superfamily protein; FUNCTIONS IN: molecular_function unknown; INVOLVED IN: response to stress; LOCATED IN: cellular_component unknown; EXPRESSED IN: carpel; EXPRESSED DURING: 4 anthesis; CONTAINS InterPro DOMAIN/s: UspA (InterPro:IPR006016), Rossmann-like alpha/beta/alpha sandwich fold (InterPro:IPR014729), Universal stress protein A (InterPro:IPR006015);…	protein_coding			-4.3696	-1.9512	-5.53346	2.31e-06	0.000931702	4.32867
AT1G32560	AT1G32560.1	Encodes LEA4-1, a member of the Late Embryogenesis Abundant (LEA) proteins which typically accumulate in response to low water availability conditions imposed during development or by the environment.	protein_coding	LATE EMBRYOGENESIS ABUNDANT 4-1 (AtLEA4-1)	LATE EMBRYOGENESIS ABUNDANT 4-1 (AtLEA4-1);LATE EMBRYOGENESIS ABUNDANT 4-1 (LEA4-1)	-4.42874	-0.561415	-5.59122	1.92e-06	0.000822332	4.79415
AT2G42560	AT2G42560.1	late embryogenesis abundant domain-containing protein / LEA domain-containing protein; FUNCTIONS IN: molecular_function unknown; INVOLVED IN: embryo development ending in seed dormancy; LOCATED IN: cellular_component unknown; EXPRESSED IN: seed; EXPRESSED DURING: seedling growth; CONTAINS InterPro DOMAIN/s: Late embryogenesis abundant protein, group 4 (InterPro:IPR004238); BEST Arabidopsis thalia…	protein_coding			-4.50631	-1.84017	-5.31678	4.6e-06	0.00147954	3.7675
AT5G06760	AT5G06760.1	Encodes LEA4-5, a member of the Late Embryogenesis Abundant (LEA) proteins which typically accumulate in response to low water availability conditions imposed during development or by the environment. Most of the diverse set of LEA proteins can be grouped according to properties such as high hydrophilicity and high content of glycine or other small amino acids in what has been termed hydrophilins…	protein_coding	LATE EMBRYOGENESIS ABUNDANT 4-5 (LEA4-5)	LATE EMBRYOGENESIS ABUNDANT 4-5 (LEA4-5);LATE EMBRYOGENESIS ABUNDANT 4-5 (AtLEA4-5)	-4.52675	0.729774	-5.46286	2.89e-06	0.00106786	4.49965
AT2G43590	AT2G43590.1	Chitinase family protein; FUNCTIONS IN: chitin binding, chitinase activity; INVOLVED IN: carbohydrate metabolic process, cell wall macromolecule catabolic process; LOCATED IN: endomembrane system; EXPRESSED IN: 7 plant structures; EXPRESSED DURING: LP.04 four leaves visible, 4 anthesis, C globular stage, LP.02 two leaves visible; CONTAINS InterPro DOMAIN/s: Chitin-binding, type 1, conserved site …	protein_coding			-4.61095	3.40854	-3.94049	0.000327391	0.0211515	0.223328
AT2G18540	AT2G18540.1	RmlC-like cupins superfamily protein; FUNCTIONS IN: nutrient reservoir activity; INVOLVED IN: biological_process unknown; LOCATED IN: endomembrane system; CONTAINS InterPro DOMAIN/s: Cupin, RmlC-type (InterPro:IPR011051), Cupin 1 (InterPro:IPR006045), RmlC-like jelly roll fold (InterPro:IPR014710); BEST Arabidopsis thaliana protein match is: RmlC-like cupins superfamily protein (TAIR:AT4G36700.1)…	protein_coding			-4.62399	-2.06419	-5.14624	7.9e-06	0.00202416	3.26774
AT1G52690	AT1G52690.1	Late embryogenesis abundant protein (LEA) family protein; BEST Arabidopsis thaliana protein match is: Late embryogenesis abundant protein (LEA) family protein (TAIR:AT3G15670.1); Has 2929 Blast hits to 1441 proteins in 420 species: Archae - 10; Bacteria - 766; Metazoa - 298; Fungi - 136; Plants - 1347; Viruses - 16; Other Eukaryotes - 356 (source: NCBI BLink).	protein_coding	LATE EMBRYOGENESIS ABUNDANT 7 (LEA7)	LATE EMBRYOGENESIS ABUNDANT 7 (LEA7)	-4.72066	0.228334	-6.10432	3.72e-07	0.000223342	6.40853
AT1G47980	AT1G47980.1	unknown protein; FUNCTIONS IN: molecular_function unknown; INVOLVED IN: biological_process unknown; LOCATED IN: endomembrane system; EXPRESSED IN: 6 plant structures; EXPRESSED DURING: 4 anthesis, F mature embryo stage, petal differentiation and expansion stage, E expanded cotyledon stage; BEST Arabidopsis thaliana protein match is: unknown protein (TAIR:AT3G62730.1); Has 169 Blast hits to 169 pr…	protein_coding			-4.97388	-2.26484	-5.16208	7.52e-06	0.00199819	3.33515
AT5G40420	AT5G40420.1	Encodes oleosin2, a protein found in oil bodies, involved in seed lipid accumulation. Suppression of OLEO1 (and OLEO2) resulted in an aberrant phenotype of embryo cells that contain unusually large oilbodies that are not normally observed in seeds. Changes in the size of oilbodies caused disruption of storage organelles, altering accumulation of lipids and proteins and causing delay in germinatio…	protein_coding	OLEOSIN 2 (OLEO2)	OLEOSIN 2 (OLE2);OLEOSIN 2 (OLEO2)	-5.14548	-1.47514	-4.29787	0.000111424	0.0117694	1.15637
AT1G73190	AT1G73190.1	Moves to the Protein Storage Vacuole in a Golgi independent manner	protein_coding	(TIP3;1)	(TIP3;1);ALPHA-TONOPLAST INTRINSIC PROTEIN (ALPHA-TIP)	-5.14758	-1.61425	-3.63998	0.000790684	0.0345763	-0.549978
AT3G03341	AT3G03341.1	unknown protein; Has 30201 Blast hits to 17322 proteins in 780 species: Archae - 12; Bacteria - 1396; Metazoa - 17338; Fungi - 3422; Plants - 5037; Viruses - 0; Other Eukaryotes - 2996 (source: NCBI BLink).	protein_coding			-5.20392	-0.814039	-5.28417	5.1e-06	0.00155299	3.82534
AT1G48130	AT1G48130.1	encodes a protein similar to the 1-cysteine (1-Cys) peroxiredoxin family of antioxidants. Expression is limited to seed (aleurone and embryo) and is not induced by ABA or drought.	protein_coding	1-CYSTEINE PEROXIREDOXIN 1 (PER1)	1-CYSTEINE PEROXIREDOXIN 1 (PER1);1-CYSTEINE PEROXIREDOXIN 1 (ATPER1)	-5.2266	-1.44456	-5.84763	8.46e-07	0.000446533	5.51183
AT2G35300	AT2G35300.1	Encodes LEA4-2/LEA18, a member of the Late Embryogenesis Abundant (LEA) proteins which typically accumulate in response to low water availability conditions imposed during development or by the environment.	protein_coding	LATE EMBRYOGENESIS ABUNDANT 18 (LEA18)	LATE EMBRYOGENESIS ABUNDANT 4-2 (AtLEA4-2);LATE EMBRYOGENESIS ABUNDANT 4-2 (LEA4-2);LATE EMBRYOGENESIS ABUNDANT 18 (LEA18)	-5.28763	-1.18404	-6.12208	3.52e-07	0.000217229	6.20445
AT2G19900	AT2G19900.1	The malic enzyme (EC 1.1.1.40) encoded by AtNADP-ME1 is expressed in response to developmental and cell-specific signals. The enzyme is active in vitro and appears to function as a homohexamer or homooctamer. It is believed to be a cytosolic protein.	protein_coding	NADP-MALIC ENZYME 1 (NADP-ME1)	NADP-MALIC ENZYME 1 (NADP-ME1);ARABIDOPSIS THALIANA NADP-MALIC ENZYME 1 (ATNADP-ME1)	-5.32253	-0.667299	-6.69383	5.68e-08	5.42e-05	7.72557
AT3G21370	AT3G21370.1	beta glucosidase 19 (BGLU19); FUNCTIONS IN: cation binding, hydrolase activity, hydrolyzing O-glycosyl compounds, catalytic activity; INVOLVED IN: carbohydrate metabolic process; LOCATED IN: endomembrane system; EXPRESSED IN: seed; CONTAINS InterPro DOMAIN/s: Glycoside hydrolase, family 1 (InterPro:IPR001360), Glycoside hydrolase, family 1, active site (InterPro:IPR018120), Glycoside hydrolase, c…	protein_coding	BETA GLUCOSIDASE 19 (BGLU19)	BETA GLUCOSIDASE 19 (BGLU19)	-5.38371	-1.48655	-5.4415	3.09e-06	0.00111988	4.32475
AT4G36600	AT4G36600.1	Late embryogenesis abundant (LEA) protein; CONTAINS InterPro DOMAIN/s: Late embryogenesis abundant protein, group 4 (InterPro:IPR004238); BEST Arabidopsis thaliana protein match is: late embryogenesis abundant domain-containing protein / LEA domain-containing protein (TAIR:AT2G18340.1); Has 1483 Blast hits to 893 proteins in 345 species: Archae - 4; Bacteria - 836; Metazoa - 93; Fungi - 47; Plant…	protein_coding			-5.58269	-1.98118	-7.67582	2.59e-09	7.55e-06	9.91929
AT3G02480	AT3G02480.1	Late embryogenesis abundant protein (LEA) family protein; BEST Arabidopsis thaliana protein match is: Late embryogenesis abundant protein (LEA) family protein (TAIR:AT5G38760.1); Has 213 Blast hits to 189 proteins in 38 species: Archae - 0; Bacteria - 0; Metazoa - 9; Fungi - 12; Plants - 190; Viruses - 0; Other Eukaryotes - 2 (source: NCBI BLink).	protein_coding			-5.58579	-0.364038	-7.17695	1.23e-08	1.85e-05	9.20169
AT5G62490	AT5G62490.1	Part of the AtHVA22 family. Protein expression is ABA- and stress-inducible.	protein_coding	HVA22 HOMOLOGUE B (HVA22B)	ARABIDOPSIS THALIANA HVA22 HOMOLOGUE B (ATHVA22B);HVA22 HOMOLOGUE B (HVA22B)	-5.69985	-1.46168	-5.26899	5.36e-06	0.00160643	3.66729
AT2G25890	AT2G25890.1	Oleosin family protein; FUNCTIONS IN: molecular_function unknown; INVOLVED IN: lipid storage; LOCATED IN: monolayer-surrounded lipid storage body, integral to membrane, membrane; EXPRESSED IN: petal, leaf whorl, flower, carpel; EXPRESSED DURING: 4 anthesis, petal differentiation and expansion stage; CONTAINS InterPro DOMAIN/s: Oleosin (InterPro:IPR000136); BEST Arabidopsis thaliana protein match …	protein_coding			-5.84136	-1.94154	-9.23615	2.33e-11	1.22e-07	13.8068
AT2G37870	AT2G37870.1	Bifunctional inhibitor/lipid-transfer protein/seed storage 2S albumin superfamily protein; FUNCTIONS IN: lipid binding; INVOLVED IN: lipid transport; LOCATED IN: endomembrane system; EXPRESSED IN: 11 plant structures; EXPRESSED DURING: LP.06 six leaves visible, LP.04 four leaves visible, 4 anthesis, C globular stage, petal differentiation and expansion stage; CONTAINS InterPro DOMAIN/s: Bifunctio…	protein_coding			-6.01069	0.612135	-4.49374	6.1e-05	0.00796154	1.61734
AT3G15670	AT3G15670.1	Late embryogenesis abundant protein (LEA) family protein; FUNCTIONS IN: molecular_function unknown; INVOLVED IN: embryo development ending in seed dormancy; LOCATED IN: nucleus; EXPRESSED DURING: dry seed stage; BEST Arabidopsis thaliana protein match is: Late embryogenesis abundant protein (LEA) family protein (TAIR:AT1G52690.2); Has 12897 Blast hits to 6829 proteins in 1482 species: Archae - 30…	protein_coding			-6.08492	-0.656076	-6.71341	5.34e-08	5.42e-05	7.85151
AT3G17520	AT3G17520.1	Late embryogenesis abundant protein (LEA) family protein; INVOLVED IN: embryo development ending in seed dormancy; LOCATED IN: endomembrane system; EXPRESSED IN: cultured cell, seed, leaf; EXPRESSED DURING: dry seed stage, LP.04 four leaves visible, seed development stages; BEST Arabidopsis thaliana protein match is: late embryogenesis abundant domain-containing protein / LEA domain-containing pr…	protein_coding			-6.19452	-0.786251	-6.13282	3.4e-07	0.000216256	6.22486
AT2G32950	AT2G32950.1	Represses photomorphogenesis and induces skotomorphogenesis in the dark. Contains a ring finger zinc-binding motif, a coiled-coil domain, and several WD-40 repeats, similar to G-beta proteins. The C-terminus has homology to TAFII80, a subunit of the TFIID component of the RNA polymerase II of Drosophila. Nuclear localization in the dark and cytoplasmic in the light.	protein_coding	CONSTITUTIVE PHOTOMORPHOGENIC 1 (COP1)	EMBRYO DEFECTIVE 168 (EMB168);FUSCA 1 (FUS1);CONSTITUTIVE PHOTOMORPHOGENIC 1 (COP1);ARABIDOPSIS THALIANA CONSTITUTIVE PHOTOMORPHOGENIC 1 (ATCOP1);DEETIOLATED MUTANT 340 (DET340)	-6.21962	-2.35544	-6.13375	3.47e-07	0.000220452	6.56455
AT3G30720	AT3G30720.1	QUA-QUINE STARCH (QQS); Has 1 Blast hits to 1 proteins in 1 species: Archae - 0; Bacteria - 0; Metazoa - 0; Fungi - 0; Plants - 1; Viruses - 0; Other Eukaryotes - 0 (source: NCBI BLink).	protein_coding	QUA-QUINE STARCH (QQS)	QUA-QUINE STARCH (QQS)	-6.65636	3.9355	-7.42073	5.74e-09	1.17e-05	10.0115

## Sheet: 2-ES-rccr2#155-GO
			GO_acc	term_type	Term	queryitem	querytotal	bgitem	bgtotal	pvalue	FDR	entries
Analysis Brief Summary			GO:0009414	P	response to water deprivation	32	382	416	28397	1.4e-14	4.7e-12	// AT3G50970 // AT5G58350 // AT5G59220 // AT2G33380 // AT2G39800 // AT2G46270 // AT4G27410 // AT3G11410 // AT2G04030 // AT1G48130 // AT4G34000 // AT3G19580 // AT3G02480 // AT4G02280 // AT1G30100 // AT4G26080 // AT5G26340 // AT5G06760 // AT5G25610 // AT5G52300 // AT5G57050 // AT2G35300 // AT1G76080 // AT1G69260 // AT5G66400 // AT1G29395 // AT1G73480 // AT1G56600 // AT2G47180 // AT5G05410 // AT2G46…
Species:	Arabidopsis		GO:0009415	P	response to water	32	382	424	28397	2.2e-14	4.7e-12	// AT3G50970 // AT5G58350 // AT5G59220 // AT2G33380 // AT2G39800 // AT2G46270 // AT4G27410 // AT3G11410 // AT2G04030 // AT1G48130 // AT4G34000 // AT3G19580 // AT3G02480 // AT4G02280 // AT1G30100 // AT4G26080 // AT5G26340 // AT5G06760 // AT5G25610 // AT5G52300 // AT5G57050 // AT2G35300 // AT1G76080 // AT1G69260 // AT5G66400 // AT1G29395 // AT1G73480 // AT1G56600 // AT2G47180 // AT5G05410 // AT2G46…
GO type:	Completed GO		GO:0009737	P	response to abscisic acid stimulus	38	382	621	28397	3.9e-14	5.5e-12	// AT3G12320 // AT5G11260 // AT3G50970 // AT3G63210 // AT5G62490 // AT2G33380 // AT5G44610 // AT2G39800 // AT3G20210 // AT2G46270 // AT5G61820 // AT2G38310 // AT4G27410 // AT3G11410 // AT2G47770 // AT1G48130 // AT4G34000 // AT4G19810 // AT3G19580 // AT5G59220 // AT3G51810 // AT5G06860 // AT4G26080 // AT5G26340 // AT1G71960 // AT5G25610 // AT5G52300 // AT5G57050 // AT2G35300 // AT1G69260 // AT5G66…
Background/Reference:	Customized		GO:0009725	P	response to hormone stimulus	54	382	1375	28397	4.5e-12	4.7e-10	// AT3G12320 // AT4G34810 // AT5G11260 // AT3G50970 // AT3G63210 // AT5G57900 // AT5G62490 // AT2G33380 // AT5G44610 // AT2G39800 // AT3G20210 // AT2G46270 // AT3G55120 // AT2G43010 // AT2G35270 // AT2G28780 // AT1G56600 // AT4G01540 // AT5G61820 // AT2G38310 // AT4G27410 // AT3G16770 // AT1G21410 // AT2G47770 // AT1G48130 // AT4G34000 // AT4G19810 // AT3G19580 // AT1G09530 // AT1G04310 // AT5G59…
Annotated number Entered:	385		GO:0042221	P	response to chemical stimulus	100	382	3978	28397	4e-10	3.4e-08	// AT5G11260 // AT4G14690 // AT5G62490 // AT2G33380 // AT3G24240 // AT2G43010 // AT4G27410 // AT3G03620 // AT4G34350 // AT5G09220 // AT5G54080 // AT3G45300 // AT1G04310 // AT1G30100 // AT3G51810 // AT5G06860 // AT2G13360 // AT5G62480 // AT5G07330 // AT5G25610 // AT3G28345 // AT5G57050 // AT3G51890 // AT4G08770 // AT4G36740 // AT1G56600 // AT2G47180 // AT3G12320 // AT2G22540 // AT3G50970 // AT3G63…
Annotated number in query list:	382		GO:0009719	P	response to endogenous stimulus	55	382	1615	28397	4.9e-10	3.4e-08	// AT3G12320 // AT4G34810 // AT2G22540 // AT3G50970 // AT3G63210 // AT5G57900 // AT5G62490 // AT5G11260 // AT2G33380 // AT5G44610 // AT2G39800 // AT3G20210 // AT2G46270 // AT3G55120 // AT2G43010 // AT2G35270 // AT2G28780 // AT1G56600 // AT4G01540 // AT5G61820 // AT2G38310 // AT4G27410 // AT3G16770 // AT1G21410 // AT2G47770 // AT1G48130 // AT4G34000 // AT4G19810 // AT3G19580 // AT1G09530 // AT1G04…
Annotated number in reference:	28397		GO:0010033	P	response to organic substance	76	382	2754	28397	1.9e-09	1.2e-07	// AT3G12320 // AT4G34810 // AT2G22540 // AT3G50970 // AT3G63210 // AT4G14690 // AT4G02280 // AT1G69260 // AT5G62490 // AT3G28345 // AT5G11260 // AT2G33380 // AT5G44610 // AT2G39800 // AT3G20210 // AT3G24240 // AT5G06860 // AT2G46270 // AT3G55120 // AT2G43010 // AT5G57900 // AT1G28330 // AT2G28780 // AT1G56600 // AT5G09220 // AT4G01540 // AT1G71400 // AT3G28460 // AT5G61820 // AT2G38310 // AT4G27…
Significant GO terms:	126		GO:0050896	P	response to stimulus	134	382	6292	28397	7.4e-09	3.7e-07	// AT5G11260 // AT4G15560 // AT4G14690 // AT5G62490 // AT2G33380 // AT5G46450 // AT3G24240 // AT2G43010 // AT4G27410 // AT3G03620 // AT4G34350 // AT5G09220 // AT2G32950 // AT2G39350 // AT5G54080 // AT3G45300 // AT1G04310 // AT1G30100 // AT3G51810 // AT5G06860 // AT2G04030 // AT5G62480 // AT5G07330 // AT5G25610 // AT3G28345 // AT5G57050 // AT3G51890 // AT1G10480 // AT4G08770 // AT4G36740 // AT1G24…
			GO:0032870	P	cellular response to hormone stimulus	30	382	641	28397	8.8e-09	3.7e-07	// AT5G11260 // AT5G57900 // AT3G20210 // AT2G46270 // AT2G43010 // AT2G28780 // AT5G61820 // AT2G38310 // AT4G27410 // AT3G16770 // AT1G21410 // AT4G34000 // AT3G19580 // AT1G09530 // AT1G04310 // AT5G59220 // AT5G06860 // AT4G26080 // AT4G01540 // AT3G62150 // AT5G52300 // AT3G28345 // AT5G57050 // AT1G80440 // AT1G69260 // AT1G10480 // AT3G11410 // AT4G17870 // AT2G46680 // AT1G07430
			GO:0009755	P	hormone-mediated signaling pathway	29	382	600	28397	8e-09	3.7e-07	// AT5G11260 // AT5G57900 // AT3G20210 // AT2G46270 // AT2G43010 // AT2G28780 // AT5G61820 // AT2G38310 // AT4G27410 // AT3G16770 // AT4G34000 // AT3G19580 // AT1G09530 // AT1G04310 // AT5G59220 // AT5G06860 // AT4G26080 // AT4G01540 // AT3G62150 // AT5G52300 // AT3G28345 // AT5G57050 // AT1G80440 // AT1G69260 // AT1G10480 // AT3G11410 // AT4G17870 // AT2G46680 // AT1G07430
			GO:0048316	P	seed development	31	382	696	28397	1.5e-08	5.6e-07	// AT5G40160 // AT3G63210 // AT2G34790 // AT4G21020 // AT5G62490 // AT1G72100 // AT3G20210 // AT2G36640 // AT5G01300 // AT3G28460 // AT2G04030 // AT3G19580 // AT4G02280 // AT1G30100 // AT3G51810 // AT2G25890 // AT1G52690 // AT5G06760 // AT3G17520 // AT5G40420 // AT3G53040 // AT2G35300 // AT3G15670 // AT4G37300 // AT2G42560 // AT1G48130 // AT3G52380 // AT4G36600 // AT1G07430 // AT2G31980 // AT1G32…
			GO:0006970	P	response to osmotic stress	34	382	842	28397	2.9e-08	1e-06	// AT3G12320 // AT5G62490 // AT2G33380 // AT5G44610 // AT2G39800 // AT1G47840 // AT2G46270 // AT4G26080 // AT5G09220 // AT4G27410 // AT3G11410 // AT2G13360 // AT2G47770 // AT4G34000 // AT1G55180 // AT4G19810 // AT3G19580 // AT5G59220 // AT2G04030 // AT5G26340 // AT5G06760 // AT5G25610 // AT5G52300 // AT5G57050 // AT2G35300 // AT1G69260 // AT1G14210 // AT1G29395 // AT1G73480 // AT1G56600 // AT2G47…
			GO:0010154	P	fruit development	31	382	721	28397	3.2e-08	1e-06	// AT5G40160 // AT3G63210 // AT2G34790 // AT4G21020 // AT5G62490 // AT1G72100 // AT3G20210 // AT2G36640 // AT5G01300 // AT3G28460 // AT2G04030 // AT3G19580 // AT4G02280 // AT1G30100 // AT3G51810 // AT2G25890 // AT1G52690 // AT5G06760 // AT3G17520 // AT5G40420 // AT3G53040 // AT2G35300 // AT3G15670 // AT4G37300 // AT2G42560 // AT1G48130 // AT3G52380 // AT4G36600 // AT1G07430 // AT2G31980 // AT1G32…
			GO:0010431	P	seed maturation	15	382	180	28397	6e-08	1.8e-06	// AT4G02280 // AT1G30100 // AT5G62490 // AT3G63210 // AT5G01300 // AT2G25890 // AT3G15670 // AT1G72100 // AT3G51810 // AT1G48130 // AT3G20210 // AT5G40420 // AT1G07430 // AT2G31980 // AT2G35300
			GO:0010162	P	seed dormancy	14	382	158	28397	8.3e-08	2.2e-06	// AT1G30100 // AT5G62490 // AT3G63210 // AT5G01300 // AT2G25890 // AT3G15670 // AT1G72100 // AT3G51810 // AT1G48130 // AT3G20210 // AT5G40420 // AT1G07430 // AT2G31980 // AT2G35300
			GO:0022611	P	dormancy process	14	382	158	28397	8.3e-08	2.2e-06	// AT1G30100 // AT5G62490 // AT3G63210 // AT5G01300 // AT2G25890 // AT3G15670 // AT1G72100 // AT3G51810 // AT1G48130 // AT3G20210 // AT5G40420 // AT1G07430 // AT2G31980 // AT2G35300
			GO:0009628	P	response to abiotic stimulus	69	382	2635	28397	9.4e-08	2.3e-06	// AT3G12320 // AT2G22540 // AT3G50970 // AT4G15560 // AT5G58350 // AT1G76080 // AT1G16390 // AT5G62490 // AT3G28345 // AT5G59220 // AT2G33380 // AT5G44610 // AT5G11260 // AT2G39800 // AT1G47840 // AT2G46270 // AT5G09220 // AT2G43010 // AT4G14690 // AT3G11410 // AT1G56600 // AT1G67090 // AT2G27720 // AT1G51140 // AT3G55120 // AT4G27410 // AT3G16770 // AT2G32950 // AT2G13360 // AT2G47770 // AT1G48…
			GO:0042538	P	hyperosmotic salinity response	14	382	162	28397	1.1e-07	2.6e-06	// AT5G59220 // AT5G62490 // AT4G26080 // AT2G46680 // AT1G29395 // AT2G33380 // AT3G11410 // AT4G27410 // AT2G39800 // AT1G73480 // AT5G57050 // AT2G46270 // AT3G19580 // AT1G69260
			GO:0009409	P	response to cold	27	382	629	28397	2.6e-07	5.8e-06	// AT3G50970 // AT5G40420 // AT1G16390 // AT2G33380 // AT5G44610 // AT1G47840 // AT1G67090 // AT2G27720 // AT4G27410 // AT2G47180 // AT5G59220 // AT3G51810 // AT5G06860 // AT4G26080 // AT5G06760 // AT5G25610 // AT5G52300 // AT3G28345 // AT5G57050 // AT5G66400 // AT3G22840 // AT1G29395 // AT1G73480 // AT1G56600 // AT3G11410 // AT2G46680 // AT1G04220
			GO:0009791	P	post-embryonic development	59	382	2188	28397	3.7e-07	7.9e-06	// AT1G72610 // AT5G66870 // AT2G22540 // AT5G40160 // AT3G63210 // AT4G14690 // AT2G34790 // AT2G40330 // AT4G21020 // AT5G62490 // AT2G47240 // AT5G11260 // AT1G72100 // AT3G20210 // AT3G24240 // AT2G30600 // AT3G28345 // AT2G43010 // AT4G18550 // AT4G26080 // AT2G35270 // AT5G01300 // AT1G51140 // AT1G71400 // AT3G28460 // AT1G60190 // AT2G32950 // AT4G37070 // AT1G21410 // AT5G01040 // AT1G48…
			GO:0071495	P	cellular response to endogenous stimulus	31	382	815	28397	4.2e-07	8.5e-06	// AT2G22540 // AT5G57900 // AT5G11260 // AT3G20210 // AT2G46270 // AT2G43010 // AT2G28780 // AT5G61820 // AT2G38310 // AT4G27410 // AT3G16770 // AT1G21410 // AT4G34000 // AT3G19580 // AT1G09530 // AT1G04310 // AT5G59220 // AT5G06860 // AT4G26080 // AT4G01540 // AT3G62150 // AT5G52300 // AT3G28345 // AT5G57050 // AT1G80440 // AT1G69260 // AT1G10480 // AT3G11410 // AT4G17870 // AT2G46680 // AT1G07…
			GO:0006950	P	response to stress	92	382	4089	28397	4.5e-07	8.6e-06	// AT4G14690 // AT5G62490 // AT2G33380 // AT5G46450 // AT2G43010 // AT4G27410 // AT4G25050 // AT2G32950 // AT1G14410 // AT3G51810 // AT5G06860 // AT2G04030 // AT5G07330 // AT5G25610 // AT3G28345 // AT5G57050 // AT3G51890 // AT4G08770 // AT1G24020 // AT1G56600 // AT3G49630 // AT2G47180 // AT1G04220 // AT3G12320 // AT2G22540 // AT3G50970 // AT5G14180 // AT2G39800 // AT2G46270 // AT5G20150 // AT3G28…
			GO:0009266	P	response to temperature stimulus	34	382	962	28397	5.8e-07	1.1e-05	// AT2G22540 // AT3G50970 // AT4G14690 // AT1G16390 // AT3G28345 // AT2G33380 // AT5G44610 // AT1G47840 // AT1G67090 // AT2G27720 // AT3G11410 // AT4G27410 // AT3G16770 // AT2G04030 // AT5G59220 // AT3G51810 // AT5G06860 // AT4G26080 // AT5G06760 // AT5G25610 // AT5G52300 // AT5G40420 // AT5G57050 // AT5G07330 // AT4G21870 // AT5G66400 // AT3G22840 // AT1G29395 // AT1G73480 // AT1G56600 // AT2G47…
			GO:0009738	P	abscisic acid mediated signaling pathway	16	382	252	28397	7e-07	1.2e-05	// AT5G59220 // AT5G06860 // AT4G26080 // AT3G19580 // AT2G46680 // AT5G61820 // AT2G38310 // AT4G27410 // AT3G11410 // AT5G52300 // AT5G57050 // AT1G07430 // AT4G17870 // AT4G34000 // AT2G46270 // AT1G69260
			GO:0010029	P	regulation of seed germination	9	382	70	28397	1.1e-06	1.8e-05	// AT4G14690 // AT2G40330 // AT3G22840 // AT1G60190 // AT4G17870 // AT1G07430 // AT1G03790 // AT4G18550 // AT4G26080
			GO:0071215	P	cellular response to abscisic acid stimulus	16	382	267	28397	1.4e-06	2.3e-05	// AT5G59220 // AT5G06860 // AT4G26080 // AT3G19580 // AT2G46680 // AT5G61820 // AT2G38310 // AT4G27410 // AT3G11410 // AT5G52300 // AT5G57050 // AT1G07430 // AT4G17870 // AT4G34000 // AT2G46270 // AT1G69260
			GO:0009651	P	response to salt stress	29	382	788	28397	1.9e-06	2.9e-05	// AT3G12320 // AT5G62490 // AT2G33380 // AT5G44610 // AT2G39800 // AT1G47840 // AT2G46270 // AT4G26080 // AT5G09220 // AT4G27410 // AT3G11410 // AT2G04030 // AT2G47770 // AT4G34000 // AT4G19810 // AT3G19580 // AT5G59220 // AT2G13360 // AT5G26340 // AT5G25610 // AT5G52300 // AT5G57050 // AT1G69260 // AT1G14210 // AT1G29395 // AT1G73480 // AT1G56600 // AT2G47180 // AT2G46680
			GO:0055114	P	oxidation reduction	41	382	1364	28397	2.2e-06	3.3e-05	// AT4G13290 // AT1G06090 // AT5G65165 // AT2G34790 // AT3G46490 // AT1G06820 // AT1G06570 // AT1G14810 // AT2G25450 // AT1G55380 // AT5G57260 // AT3G26550 // AT5G03260 // AT2G46950 // AT3G07000 // AT4G34350 // AT2G02700 // AT5G01040 // AT2G38080 // AT3G45300 // AT2G27010 // AT1G60680 // AT4G11290 // AT1G67110 // AT5G14780 // AT2G46750 // AT1G64940 // AT3G20110 // AT3G13760 // AT1G12010 // AT5G57…
			GO:0071310	P	cellular response to organic substance	37	382	1234	28397	7.5e-06	0.00011	// AT2G22540 // AT5G57900 // AT3G28345 // AT5G11260 // AT3G20210 // AT2G46270 // AT1G69260 // AT2G43010 // AT2G28780 // AT3G28460 // AT5G61820 // AT2G38310 // AT4G27410 // AT3G16770 // AT1G21410 // AT4G34000 // AT3G19580 // AT1G09530 // AT1G04310 // AT5G59220 // AT3G51810 // AT5G06860 // AT4G26080 // AT4G01540 // AT3G62150 // AT1G12010 // AT5G52300 // AT5G40420 // AT5G57050 // AT1G80440 // AT3G51…
			GO:0070887	P	cellular response to chemical stimulus	40	382	1417	28397	1.2e-05	0.00017	// AT2G22540 // AT4G16190 // AT5G58350 // AT3G28345 // AT5G11260 // AT3G20210 // AT2G46270 // AT1G69260 // AT2G43010 // AT5G57900 // AT2G28780 // AT3G28460 // AT5G61820 // AT2G38310 // AT4G27410 // AT3G16770 // AT1G21410 // AT4G34000 // AT3G19580 // AT1G09530 // AT1G04310 // AT5G59220 // AT3G51810 // AT5G06860 // AT4G26080 // AT4G01540 // AT3G62150 // AT1G12010 // AT5G52300 // AT5G40420 // AT5G57…
			GO:0006972	P	hyperosmotic response	14	382	251	28397	1.4e-05	0.00019	// AT5G59220 // AT5G62490 // AT4G26080 // AT2G46680 // AT1G29395 // AT2G33380 // AT3G11410 // AT4G27410 // AT2G39800 // AT1G73480 // AT5G57050 // AT2G46270 // AT3G19580 // AT1G69260
			GO:0009793	P	embryonic development ending in seed dormancy	22	382	563	28397	1.4e-05	0.00019	// AT5G40160 // AT2G34790 // AT4G21020 // AT1G72100 // AT3G20210 // AT2G36640 // AT3G28460 // AT2G04030 // AT3G19580 // AT3G51810 // AT1G52690 // AT5G06760 // AT3G17520 // AT5G40420 // AT3G53040 // AT2G35300 // AT3G15670 // AT4G37300 // AT2G42560 // AT3G52380 // AT4G36600 // AT1G32560
			GO:0051716	P	cellular response to stimulus	57	382	2355	28397	1.5e-05	0.00019	// AT5G11260 // AT4G16190 // AT5G58350 // AT5G59220 // AT1G29395 // AT2G47240 // AT2G22540 // AT3G62150 // AT5G44610 // AT2G25095 // AT3G20210 // AT2G46270 // AT5G09220 // AT3G28345 // AT2G43010 // AT4G14690 // AT2G28780 // AT5G20150 // AT4G27410 // AT1G16390 // AT3G28460 // AT5G61820 // AT2G38310 // AT5G59090 // AT3G16770 // AT2G32950 // AT1G21410 // AT4G34000 // AT1G55180 // AT3G19580 // AT1G09…
			GO:0032502	P	developmental process	86	382	4094	28397	1.7e-05	0.00022	// AT1G72610 // AT5G11260 // AT5G40160 // AT4G15560 // AT4G14690 // AT2G40330 // AT5G62490 // AT3G24240 // AT2G43010 // AT2G36640 // AT1G51140 // AT4G25050 // AT1G60190 // AT2G32950 // AT1G30100 // AT3G51810 // AT3G28345 // AT5G55250 // AT1G80180 // AT4G37300 // AT3G49630 // AT1G04220 // AT1G03790 // AT4G39720 // AT2G22540 // AT3G63210 // AT2G34790 // AT4G21020 // AT1G72100 // AT2G39800 // AT2G30…
			GO:0007275	P	multicellular organismal development	82	382	3864	28397	2e-05	0.00024	// AT4G39720 // AT5G66870 // AT2G22540 // AT5G40160 // AT4G15560 // AT5G58350 // AT1G10480 // AT2G34790 // AT2G40330 // AT3G51600 // AT5G62490 // AT2G47240 // AT5G59220 // AT1G72100 // AT5G44610 // AT5G11260 // AT2G39800 // AT3G20210 // AT3G24240 // AT4G28530 // AT3G63210 // AT1G77450 // AT3G28345 // AT2G43010 // AT4G18550 // AT1G64320 // AT2G35270 // AT4G22212 // AT5G01300 // AT1G51140 // AT1G71…
			GO:0023057	P	negative regulation of signaling process	7	382	57	28397	2.2e-05	0.00025	// AT1G04310 // AT5G59220 // AT4G26080 // AT1G07430 // AT3G11410 // AT5G57050 // AT1G80440
			GO:0009968	P	negative regulation of signal transduction	7	382	57	28397	2.2e-05	0.00025	// AT1G04310 // AT5G59220 // AT4G26080 // AT1G07430 // AT3G11410 // AT5G57050 // AT1G80440
			GO:0010648	P	negative regulation of cell communication	7	382	57	28397	2.2e-05	0.00025	// AT1G04310 // AT5G59220 // AT4G26080 // AT1G07430 // AT3G11410 // AT5G57050 // AT1G80440
			GO:0009845	P	seed germination	13	382	233	28397	2.8e-05	0.00031	// AT3G51810 // AT4G14690 // AT2G40330 // AT3G22840 // AT1G60190 // AT4G17870 // AT3G20210 // AT5G40420 // AT1G07430 // AT2G35300 // AT1G03790 // AT4G18550 // AT4G26080
			GO:0044036	P	cell wall macromolecule metabolic process	15	382	319	28397	4.6e-05	0.00048	// AT3G10340 // AT4G39720 // AT1G10480 // AT5G03260 // AT1G11580 // AT2G43590 // AT1G43800 // AT3G62270 // AT3G62020 // AT2G38080 // AT4G35350 // AT1G54790 // AT4G30290 // AT1G32100 // AT5G55250
			GO:0032501	P	multicellular organismal process	83	382	4020	28397	4.7e-05	0.00048	// AT4G39720 // AT5G66870 // AT2G22540 // AT5G40160 // AT4G15560 // AT5G58350 // AT1G10480 // AT2G34790 // AT2G40330 // AT3G51600 // AT5G62490 // AT2G47240 // AT5G59220 // AT1G72100 // AT5G44610 // AT5G11260 // AT2G39800 // AT3G20210 // AT3G24240 // AT4G28530 // AT3G63210 // AT1G77450 // AT3G28345 // AT2G43010 // AT4G18550 // AT1G64320 // AT2G35270 // AT4G22212 // AT5G01300 // AT1G51140 // AT1G71…
			GO:0048609	P	reproductive process in a multicellular organism	16	382	378	28397	8.6e-05	0.00084	// AT4G02280 // AT1G30100 // AT5G62490 // AT3G63210 // AT5G01300 // AT2G25890 // AT3G15670 // AT1G64110 // AT1G72100 // AT3G51810 // AT1G48130 // AT3G20210 // AT5G40420 // AT1G07430 // AT2G31980 // AT2G35300
			GO:0009790	P	embryonic development	22	382	638	28397	8.4e-05	0.00084	// AT5G40160 // AT2G34790 // AT4G21020 // AT1G72100 // AT3G20210 // AT2G36640 // AT3G28460 // AT2G04030 // AT3G19580 // AT3G51810 // AT1G52690 // AT5G06760 // AT3G17520 // AT5G40420 // AT3G53040 // AT2G35300 // AT3G15670 // AT4G37300 // AT2G42560 // AT3G52380 // AT4G36600 // AT1G32560
			GO:0048608	P	reproductive structure development	43	382	1722	28397	9.5e-05	0.00091	// AT5G66870 // AT2G22540 // AT5G40160 // AT3G63210 // AT3G28345 // AT2G34790 // AT4G21020 // AT5G62490 // AT5G11260 // AT1G72100 // AT3G20210 // AT3G24240 // AT2G30600 // AT2G35270 // AT5G01300 // AT1G51140 // AT1G71400 // AT3G28460 // AT2G32950 // AT2G04030 // AT5G01040 // AT3G19580 // AT4G02280 // AT1G30100 // AT3G51810 // AT2G25890 // AT1G52690 // AT5G06760 // AT3G17520 // AT5G40420 // AT3G53…
			GO:0010118	P	stomatal movement	7	382	75	28397	0.00011	0.001	// AT5G59220 // AT4G18290 // AT2G33380 // AT3G11410 // AT2G32950 // AT4G17970 // AT4G26080
			GO:0009788	P	negative regulation of abscisic acid mediated signaling pathway	5	382	32	28397	0.00012	0.0011	// AT1G07430 // AT5G59220 // AT3G11410 // AT4G26080 // AT5G57050
			GO:0032504	P	multicellular organism reproduction	16	382	405	28397	0.00018	0.0016	// AT4G02280 // AT1G30100 // AT5G62490 // AT3G63210 // AT5G01300 // AT2G25890 // AT3G15670 // AT1G64110 // AT1G72100 // AT3G51810 // AT1G48130 // AT3G20210 // AT5G40420 // AT1G07430 // AT2G31980 // AT2G35300
			GO:0023052	P	signaling	53	382	2376	28397	0.00024	0.0021	// AT5G11260 // AT5G58350 // AT1G10480 // AT1G29395 // AT3G28345 // AT2G22540 // AT5G44610 // AT2G25095 // AT5G46450 // AT3G24240 // AT2G46270 // AT1G69260 // AT2G43010 // AT5G57900 // AT2G28780 // AT5G20150 // AT4G27410 // AT1G71400 // AT5G61820 // AT2G38310 // AT5G59090 // AT3G16770 // AT4G17870 // AT4G34000 // AT1G55180 // AT3G19580 // AT1G60989 // AT1G09530 // AT1G04310 // AT5G59220 // AT3G51…
			GO:0007242	P	intracellular signaling cascade	33	382	1252	28397	0.00025	0.0022	// AT2G22540 // AT5G57900 // AT3G28345 // AT5G11260 // AT3G20210 // AT2G46270 // AT1G69260 // AT2G43010 // AT2G28780 // AT5G61820 // AT2G38310 // AT4G27410 // AT3G16770 // AT4G34000 // AT3G19580 // AT1G09530 // AT1G04310 // AT5G59220 // AT3G51810 // AT5G06860 // AT4G26080 // AT4G01540 // AT3G62150 // AT5G52300 // AT5G40420 // AT5G57050 // AT1G80440 // AT1G10480 // AT1G43800 // AT3G11410 // AT4G17…
			GO:0009269	P	response to desiccation	5	382	39	28397	0.00028	0.0024	// AT5G25610 // AT1G48130 // AT2G39800 // AT1G29395 // AT2G33380
			GO:0007165	P	signal transduction	40	382	1670	28397	0.00038	0.0032	// AT2G22540 // AT5G57900 // AT3G28345 // AT5G11260 // AT5G44610 // AT5G46450 // AT3G24240 // AT2G46270 // AT1G69260 // AT2G43010 // AT2G28780 // AT1G71400 // AT5G61820 // AT2G38310 // AT4G27410 // AT3G16770 // AT4G17870 // AT4G34000 // AT5G44920 // AT3G19580 // AT1G60989 // AT1G09530 // AT1G04310 // AT5G59220 // AT3G51810 // AT5G06860 // AT4G26080 // AT4G01540 // AT3G62150 // AT5G52300 // AT5G40…
			GO:0010383	P	cell wall polysaccharide metabolic process	11	382	231	28397	0.00042	0.0034	// AT3G10340 // AT5G03260 // AT1G11580 // AT2G38080 // AT1G54790 // AT3G62270 // AT3G62020 // AT4G35350 // AT4G30290 // AT1G32100 // AT5G55250
			GO:0071489	P	cellular response to red or far red light	5	382	47	28397	0.00063	0.005	// AT4G14690 // AT3G22840 // AT2G43010 // AT5G11260 // AT1G09530
			GO:0000041	P	transition metal ion transport	11	382	243	28397	0.00063	0.005	// AT2G35270 // AT4G22212 // AT5G44610 // AT2G46750 // AT1G77330 // AT5G19520 // AT3G62270 // AT5G59090 // AT3G24240 // AT2G01530 // AT3G14680
			GO:0010224	P	response to UV-B	7	382	104	28397	0.00072	0.0054	// AT5G11260 // AT4G14690 // AT3G22840 // AT3G55120 // AT5G05410 // AT2G32950 // AT5G03240
			GO:0010114	P	response to red light	7	382	104	28397	0.00072	0.0054	// AT5G11260 // AT4G14690 // AT1G67090 // AT3G22840 // AT5G38430 // AT4G25050 // AT2G43010
			GO:0010646	P	regulation of cell communication	9	382	175	28397	0.00083	0.0061	// AT1G04310 // AT5G59220 // AT5G20150 // AT4G26080 // AT1G07430 // AT3G11410 // AT5G57050 // AT1G80440 // AT2G43010
			GO:0009733	P	response to auxin stimulus	15	382	431	28397	0.001	0.0073	// AT2G35270 // AT4G34810 // AT5G59220 // AT3G28345 // AT3G62150 // AT1G69260 // AT4G36740 // AT2G28780 // AT3G19580 // AT4G27410 // AT1G21410 // AT2G46270 // AT3G55120 // AT2G43010 // AT4G26080
			GO:0009787	P	regulation of abscisic acid mediated signaling pathway	5	382	53	28397	0.001	0.0073	// AT1G07430 // AT5G59220 // AT3G11410 // AT4G26080 // AT5G57050
			GO:0007568	P	aging	8	382	145	28397	0.001	0.0073	// AT5G59220 // AT1G11190 // AT5G58350 // AT1G26820 // AT5G66170 // AT5G44610 // AT3G49630 // AT5G52300
			GO:0023060	P	signal transmission	40	382	1767	28397	0.0011	0.0076	// AT2G22540 // AT5G57900 // AT3G28345 // AT5G11260 // AT5G44610 // AT5G46450 // AT3G24240 // AT2G46270 // AT1G69260 // AT2G43010 // AT2G28780 // AT1G71400 // AT5G61820 // AT2G38310 // AT4G27410 // AT3G16770 // AT4G17870 // AT4G34000 // AT5G44920 // AT3G19580 // AT1G60989 // AT1G09530 // AT1G04310 // AT5G59220 // AT3G51810 // AT5G06860 // AT4G26080 // AT4G01540 // AT3G62150 // AT5G52300 // AT5G40…
			GO:0023046	P	signaling process	40	382	1768	28397	0.0011	0.0076	// AT2G22540 // AT5G57900 // AT3G28345 // AT5G11260 // AT5G44610 // AT5G46450 // AT3G24240 // AT2G46270 // AT1G69260 // AT2G43010 // AT2G28780 // AT1G71400 // AT5G61820 // AT2G38310 // AT4G27410 // AT3G16770 // AT4G17870 // AT4G34000 // AT5G44920 // AT3G19580 // AT1G60989 // AT1G09530 // AT1G04310 // AT5G59220 // AT3G51810 // AT5G06860 // AT4G26080 // AT4G01540 // AT3G62150 // AT5G52300 // AT5G40…
			GO:0042440	P	pigment metabolic process	13	382	361	28397	0.0016	0.011	// AT5G11260 // AT4G15560 // AT4G14690 // AT3G22840 // AT1G06820 // AT1G06570 // AT3G55120 // AT2G32950 // AT1G10830 // AT5G01520 // AT1G09530 // AT5G54080 // AT5G13630
			GO:0003006	P	reproductive developmental process	44	382	2050	28397	0.0017	0.011	// AT5G66870 // AT2G22540 // AT5G40160 // AT3G63210 // AT3G28345 // AT2G34790 // AT4G21020 // AT5G62490 // AT5G11260 // AT1G72100 // AT3G20210 // AT3G24240 // AT2G30600 // AT1G64320 // AT2G35270 // AT5G01300 // AT1G51140 // AT1G71400 // AT3G28460 // AT2G32950 // AT2G04030 // AT5G01040 // AT3G19580 // AT4G02280 // AT1G30100 // AT3G51810 // AT2G25890 // AT1G52690 // AT5G06760 // AT3G17520 // AT5G40…
			GO:0048580	P	regulation of post-embryonic development	15	382	459	28397	0.0018	0.012	// AT5G11260 // AT3G51810 // AT4G14690 // AT2G40330 // AT3G22840 // AT2G22540 // AT1G60190 // AT2G32950 // AT4G10180 // AT5G40420 // AT1G07430 // AT4G17870 // AT1G03790 // AT4G18550 // AT4G26080
			GO:0010410	P	hemicellulose metabolic process	9	382	198	28397	0.0019	0.012	// AT3G10340 // AT5G03260 // AT2G38080 // AT1G54790 // AT3G62020 // AT4G35350 // AT4G30290 // AT1G32100 // AT5G55250
			GO:0006629	P	lipid metabolic process	39	382	1772	28397	0.0021	0.013	// AT2G34490 // AT4G15560 // AT1G06090 // AT3G51600 // AT2G21180 // AT2G47240 // AT1G06570 // AT2G33380 // AT1G48300 // AT5G14180 // AT4G34350 // AT1G28650 // AT4G18550 // AT5G58350 // AT5G20150 // AT2G28630 // AT4G25050 // AT5G59090 // AT4G37070 // AT1G10830 // AT1G55180 // AT5G54080 // AT1G54790 // AT4G02280 // AT1G30100 // AT1G06080 // AT1G06820 // AT2G23040 // AT3G17520 // AT4G13280 // AT1G43…
			GO:0010382	P	cellular cell wall macromolecule metabolic process	9	382	203	28397	0.0022	0.014	// AT3G10340 // AT5G03260 // AT2G38080 // AT1G54790 // AT3G62020 // AT4G35350 // AT4G30290 // AT1G32100 // AT5G55250
			GO:0048856	P	anatomical structure development	65	382	3396	28397	0.0025	0.015	// AT4G39720 // AT5G66870 // AT2G22540 // AT5G40160 // AT4G15560 // AT5G58350 // AT2G34790 // AT3G51600 // AT5G62490 // AT2G47240 // AT5G59220 // AT1G72100 // AT5G44610 // AT5G11260 // AT2G39800 // AT3G20210 // AT3G24240 // AT3G63210 // AT2G30600 // AT3G28345 // AT4G37070 // AT1G64320 // AT2G35270 // AT4G22212 // AT5G01300 // AT1G51140 // AT1G71400 // AT3G28460 // AT4G25050 // AT2G32950 // AT1G21…
			GO:0030001	P	metal ion transport	17	382	576	28397	0.0027	0.016	// AT2G35270 // AT3G26740 // AT4G22212 // AT4G18290 // AT3G62270 // AT5G44610 // AT2G46750 // AT1G77330 // AT1G74730 // AT5G19520 // AT5G59090 // AT3G24240 // AT2G13360 // AT5G09220 // AT2G01530 // AT3G14680 // AT1G72610
			GO:0010218	P	response to far red light	6	382	99	28397	0.0028	0.016	// AT5G11260 // AT4G14690 // AT1G67090 // AT3G22840 // AT5G38430 // AT4G25050
			GO:0022414	P	reproductive process	46	382	2224	28397	0.0028	0.016	// AT5G66870 // AT2G22540 // AT5G40160 // AT3G63210 // AT3G28345 // AT2G34790 // AT4G21020 // AT5G62490 // AT5G11260 // AT1G72100 // AT3G20210 // AT3G24240 // AT2G30600 // AT1G64320 // AT2G35270 // AT5G01300 // AT1G51140 // AT1G71400 // AT3G28460 // AT2G32950 // AT2G04030 // AT5G01040 // AT3G19580 // AT4G02280 // AT1G30100 // AT3G51810 // AT2G25890 // AT1G64110 // AT1G52690 // AT5G06760 // AT3G17…
			GO:0009966	P	regulation of signal transduction	8	382	171	28397	0.0028	0.016	// AT1G04310 // AT5G59220 // AT4G26080 // AT1G07430 // AT3G11410 // AT5G57050 // AT1G80440 // AT2G43010
			GO:0023051	P	regulation of signaling process	8	382	171	28397	0.0028	0.016	// AT1G04310 // AT5G59220 // AT4G26080 // AT1G07430 // AT3G11410 // AT5G57050 // AT1G80440 // AT2G43010
			GO:0008152	P	metabolic process	211	382	13633	28397	0.0029	0.016	// AT1G29930 // AT5G11260 // AT4G15560 // AT4G14690 // AT1G06820 // AT2G33380 // AT2G25450 // AT2G20020 // AT3G24240 // AT1G28650 // AT3G24310 // AT3G55120 // AT2G43010 // AT5G58350 // AT4G27410 // AT3G54940 // AT1G51140 // AT2G28630 // AT5G09220 // AT1G60190 // AT2G32950 // AT1G64940 // AT1G10830 // AT1G62710 // AT5G54080 // AT3G45300 // AT1G60680 // AT1G30100 // AT3G51810 // AT1G67110 // AT1G61…
			GO:0009408	P	response to heat	11	382	303	28397	0.0034	0.019	// AT3G16770 // AT3G50970 // AT4G14690 // AT3G22840 // AT5G07330 // AT2G47180 // AT5G05410 // AT2G04030 // AT5G57050 // AT4G21870 // AT4G26080
			GO:0048585	P	negative regulation of response to stimulus	12	382	349	28397	0.0034	0.019	// AT1G04310 // AT2G22540 // AT5G06860 // AT4G26080 // AT5G59220 // AT1G07430 // AT3G11410 // AT2G32950 // AT4G10180 // AT5G57050 // AT1G80440 // AT2G43010
			GO:0009698	P	phenylpropanoid metabolic process	13	382	405	28397	0.0042	0.021	// AT5G11260 // AT5G03260 // AT1G32100 // AT3G22840 // AT2G38080 // AT3G55120 // AT2G32950 // AT5G01040 // AT4G14690 // AT4G11210 // AT5G09220 // AT1G04220 // AT1G09530
			GO:0000003	P	reproduction	46	382	2272	28397	0.0041	0.021	// AT5G66870 // AT2G22540 // AT5G40160 // AT3G63210 // AT3G28345 // AT2G34790 // AT4G21020 // AT5G62490 // AT5G11260 // AT1G72100 // AT3G20210 // AT3G24240 // AT2G30600 // AT1G64320 // AT2G35270 // AT5G01300 // AT1G51140 // AT1G71400 // AT3G28460 // AT2G32950 // AT2G04030 // AT5G01040 // AT3G19580 // AT4G02280 // AT1G30100 // AT3G51810 // AT2G25890 // AT1G64110 // AT1G52690 // AT5G06760 // AT3G17…
			GO:0010413	P	glucuronoxylan metabolic process	8	382	182	28397	0.004	0.021	// AT3G10340 // AT5G03260 // AT2G38080 // AT3G62020 // AT4G35350 // AT1G54790 // AT1G32100 // AT5G55250
			GO:0009644	P	response to high light intensity	9	382	224	28397	0.0041	0.021	// AT4G14690 // AT3G22840 // AT4G25050 // AT2G47180 // AT5G05410 // AT5G57050 // AT5G07330 // AT4G21870 // AT4G18290
			GO:0009639	P	response to red or far red light	13	382	406	28397	0.0043	0.021	// AT5G11260 // AT3G51810 // AT4G14690 // AT2G04030 // AT1G67090 // AT3G22840 // AT5G38430 // AT4G25050 // AT2G32950 // AT4G10180 // AT5G40420 // AT2G43010 // AT1G09530
			GO:0009605	P	response to external stimulus	26	382	1087	28397	0.0041	0.021	// AT5G58350 // AT5G04230 // AT1G77330 // AT4G13280 // AT5G44610 // AT2G25095 // AT2G46270 // AT2G43010 // AT5G20150 // AT4G27410 // AT5G59090 // AT2G32950 // AT1G55180 // AT3G19580 // AT1G09530 // AT5G59220 // AT4G26080 // AT5G14780 // AT5G19520 // AT3G62270 // AT3G28345 // AT2G01530 // AT1G69260 // AT1G29395 // AT3G49630 // AT1G04220
			GO:0045492	P	xylan biosynthetic process	8	382	183	28397	0.0042	0.021	// AT3G10340 // AT5G03260 // AT2G38080 // AT3G62020 // AT4G35350 // AT1G54790 // AT1G32100 // AT5G55250
			GO:0019439	P	aromatic compound catabolic process	6	382	108	28397	0.0042	0.021	// AT3G10340 // AT5G03260 // AT5G04230 // AT5G01040 // AT2G38080 // AT5G54080
			GO:0007154	P	cell communication	20	382	758	28397	0.004	0.021	// AT1G04310 // AT5G59220 // AT5G06860 // AT1G07430 // AT5G44610 // AT1G29395 // AT1G77330 // AT3G62270 // AT5G59090 // AT3G49630 // AT3G11410 // AT2G25095 // AT5G57050 // AT1G80440 // AT5G20150 // AT4G26080 // AT1G55180 // AT2G01530 // AT2G43010 // AT5G58350
			GO:0070592	P	cell wall polysaccharide biosynthetic process	8	382	187	28397	0.0047	0.022	// AT3G10340 // AT5G03260 // AT2G38080 // AT3G62020 // AT4G35350 // AT1G54790 // AT1G32100 // AT5G55250
			GO:0044038	P	cell wall macromolecule biosynthetic process	8	382	187	28397	0.0047	0.022	// AT3G10340 // AT5G03260 // AT2G38080 // AT3G62020 // AT4G35350 // AT1G54790 // AT1G32100 // AT5G55250
			GO:0071482	P	cellular response to light stimulus	5	382	77	28397	0.0048	0.022	// AT4G14690 // AT3G22840 // AT2G43010 // AT5G11260 // AT1G09530
			GO:0071478	P	cellular response to radiation	5	382	77	28397	0.0048	0.022	// AT4G14690 // AT3G22840 // AT2G43010 // AT5G11260 // AT1G09530
			GO:0045491	P	xylan metabolic process	8	382	186	28397	0.0046	0.022	// AT3G10340 // AT5G03260 // AT2G38080 // AT3G62020 // AT4G35350 // AT1G54790 // AT1G32100 // AT5G55250
			GO:0070589	P	cellular component macromolecule biosynthetic process	8	382	187	28397	0.0047	0.022	// AT3G10340 // AT5G03260 // AT2G38080 // AT3G62020 // AT4G35350 // AT1G54790 // AT1G32100 // AT5G55250
			GO:0070882	P	cellular cell wall organization or biogenesis	12	382	367	28397	0.0051	0.023	// AT3G02480 // AT3G10340 // AT5G03260 // AT1G43790 // AT2G38080 // AT1G52690 // AT3G62020 // AT4G35350 // AT1G54790 // AT4G30290 // AT1G32100 // AT5G55250
			GO:0044255	P	cellular lipid metabolic process	31	382	1395	28397	0.0051	0.023	// AT2G34490 // AT4G15560 // AT5G58350 // AT3G51600 // AT2G47240 // AT1G06570 // AT2G33380 // AT1G48300 // AT5G14180 // AT4G34350 // AT2G21180 // AT4G18550 // AT5G20150 // AT2G28630 // AT4G25050 // AT1G10830 // AT1G55180 // AT5G54080 // AT4G02280 // AT1G30100 // AT1G06080 // AT1G06820 // AT2G23040 // AT3G17520 // AT4G13280 // AT1G43800 // AT4G27030 // AT2G31980 // AT1G04220 // AT3G52380 // AT3G20…
			GO:0071365	P	cellular response to auxin stimulus	5	382	79	28397	0.0053	0.023	// AT3G62150 // AT2G28780 // AT3G28345 // AT2G43010 // AT1G21410
			GO:0048581	P	negative regulation of post-embryonic development	5	382	80	28397	0.0055	0.024	// AT2G22540 // AT2G32950 // AT1G03790 // AT4G18550 // AT4G10180
			GO:0009642	P	response to light intensity	10	382	282	28397	0.006	0.026	// AT4G14690 // AT3G22840 // AT4G25050 // AT2G47180 // AT5G05410 // AT5G57050 // AT2G32950 // AT5G07330 // AT4G21870 // AT4G18290
			GO:0009740	P	gibberellic acid mediated signaling pathway	5	382	82	28397	0.0061	0.026	// AT1G07430 // AT5G11260 // AT3G20210 // AT1G10480 // AT1G09530
			GO:0010476	P	gibberellin mediated signaling pathway	5	382	83	28397	0.0064	0.027	// AT1G07430 // AT5G11260 // AT3G20210 // AT1G10480 // AT1G09530
			GO:0019748	P	secondary metabolic process	28	382	1247	28397	0.0067	0.028	// AT2G43910 // AT5G11260 // AT4G15560 // AT4G14690 // AT1G06820 // AT1G06570 // AT4G13280 // AT2G25450 // AT3G20210 // AT5G09220 // AT3G55120 // AT2G32950 // AT5G01040 // AT1G10830 // AT1G32100 // AT1G09530 // AT1G30100 // AT5G03260 // AT5G62480 // AT2G23040 // AT3G46490 // AT4G11210 // AT3G05730 // AT2G38080 // AT3G22840 // AT2G34490 // AT1G77450 // AT1G04220
			GO:0071370	P	cellular response to gibberellin stimulus	5	382	84	28397	0.0067	0.028	// AT1G07430 // AT5G11260 // AT3G20210 // AT1G10480 // AT1G09530
			GO:0006725	P	cellular aromatic compound metabolic process	24	382	1022	28397	0.007	0.029	// AT3G10340 // AT5G11260 // AT4G15560 // AT4G14690 // AT5G04230 // AT3G55120 // AT5G43910 // AT4G04620 // AT5G61820 // AT1G67110 // AT5G09220 // AT2G32950 // AT5G01040 // AT1G32100 // AT5G54080 // AT1G09530 // AT1G06570 // AT5G03260 // AT4G15550 // AT4G11210 // AT4G08770 // AT2G38080 // AT3G22840 // AT1G04220
			GO:0009411	P	response to UV	9	382	247	28397	0.0075	0.031	// AT5G11260 // AT4G14690 // AT3G22840 // AT3G55120 // AT5G05410 // AT3G28345 // AT2G32950 // AT5G03240 // AT1G04220
			GO:0046283	P	anthocyanin metabolic process	5	382	87	28397	0.0077	0.031	// AT3G22840 // AT3G55120 // AT2G32950 // AT5G11260 // AT1G09530
			GO:0006519	P	cellular amino acid and derivative metabolic process	29	382	1324	28397	0.008	0.032	// AT3G10340 // AT5G11260 // AT4G15560 // AT4G14690 // AT5G04230 // AT1G14810 // AT2G39800 // AT4G04620 // AT3G55120 // AT5G09220 // AT5G61820 // AT2G32950 // AT5G01040 // AT1G55180 // AT1G32100 // AT5G54080 // AT3G45300 // AT1G09530 // AT1G06570 // AT5G03260 // AT4G15550 // AT1G12010 // AT4G11210 // AT4G18460 // AT2G38080 // AT3G22840 // AT1G77330 // AT2G44040 // AT1G04220
			GO:0006812	P	cation transport	20	382	813	28397	0.0084	0.033	// AT2G35270 // AT3G26740 // AT4G22212 // AT4G15560 // AT4G18290 // AT3G62270 // AT5G44610 // AT2G46750 // AT1G77330 // AT1G74730 // AT5G19520 // AT5G59090 // AT1G79520 // AT3G24240 // AT2G13360 // AT4G25050 // AT5G09220 // AT2G01530 // AT3G14680 // AT1G72610
			GO:0009744	P	response to sucrose stimulus	8	382	210	28397	0.009	0.035	// AT1G28330 // AT4G14690 // AT3G22840 // AT5G19520 // AT3G55120 // AT4G25050 // AT5G54080 // AT3G45300
			GO:0034285	P	response to disaccharide stimulus	8	382	213	28397	0.0097	0.038	// AT1G28330 // AT4G14690 // AT3G22840 // AT5G19520 // AT3G55120 // AT4G25050 // AT5G54080 // AT3G45300
			GO:0010260	P	organ senescence	5	382	96	28397	0.011	0.043	// AT1G11190 // AT5G59220 // AT5G52300 // AT5G58350 // AT5G44610
			GO:0010149	P	senescence	5	382	96	28397	0.011	0.043	// AT1G11190 // AT5G59220 // AT5G52300 // AT5G58350 // AT5G44610
			GO:0048518	P	positive regulation of biological process	21	382	896	28397	0.012	0.043	// AT2G22540 // AT4G15560 // AT2G42890 // AT4G01540 // AT5G01300 // AT1G69260 // AT3G22840 // AT5G11260 // AT3G28460 // AT5G09220 // AT4G27410 // AT3G16770 // AT2G32950 // AT1G21410 // AT2G46680 // AT1G07430 // AT5G20150 // AT4G34000 // AT1G55180 // AT4G14690 // AT1G09530
			GO:0048519	P	negative regulation of biological process	27	382	1243	28397	0.011	0.043	// AT2G22540 // AT5G59220 // AT3G61897 // AT5G44610 // AT5G11260 // AT2G25095 // AT2G43010 // AT4G18550 // AT2G35270 // AT5G20150 // AT3G28460 // AT2G32950 // AT1G21410 // AT3G19580 // AT1G04310 // AT1G14410 // AT5G06860 // AT4G26080 // AT2G27400 // AT4G10180 // AT5G57050 // AT1G80440 // AT4G08770 // AT1G69260 // AT3G11410 // AT1G07430 // AT1G03790
			GO:0016114	P	terpenoid biosynthetic process	9	382	268	28397	0.012	0.046	// AT1G30100 // AT4G15560 // AT2G34490 // AT1G06820 // AT1G06570 // AT4G13280 // AT2G23040 // AT3G20210 // AT1G10830
			GO:0023033	P	signaling pathway	14	382	519	28397	0.013	0.046	// AT1G04310 // AT2G28780 // AT5G06860 // AT3G28345 // AT3G62150 // AT2G43010 // AT4G26080 // AT3G16770 // AT1G64210 // AT3G24240 // AT4G34000 // AT3G51890 // AT2G46270 // AT3G47570
			GO:0006811	P	ion transport	23	382	1019	28397	0.013	0.046	// AT1G72610 // AT4G15560 // AT1G16390 // AT5G44610 // AT1G79520 // AT3G24240 // AT5G09220 // AT2G35270 // AT3G26740 // AT5G20150 // AT4G22212 // AT1G74730 // AT4G25050 // AT5G59090 // AT2G13360 // AT2G22470 // AT2G46750 // AT3G62270 // AT5G19520 // AT2G01530 // AT3G14680 // AT4G18290 // AT1G77330
			GO:0071554	P	cell wall organization or biogenesis	22	382	963	28397	0.013	0.047	// AT3G10340 // AT4G39720 // AT2G22540 // AT2G34790 // AT1G64320 // AT5G55250 // AT4G35350 // AT1G05310 // AT2G38080 // AT3G02480 // AT5G03260 // AT1G11580 // AT1G43790 // AT3G62270 // AT1G52690 // AT3G62020 // AT1G10480 // AT1G43800 // AT1G32100 // AT1G54790 // AT4G30290 // AT2G43590
			GO:0015674	P	di- tri-valent inorganic cation transport	10	382	321	28397	0.014	0.049	// AT1G72610 // AT3G26740 // AT5G44610 // AT1G77330 // AT3G62270 // AT1G74730 // AT5G59090 // AT2G13360 // AT5G09220 // AT2G01530
			GO:0016491	F	oxidoreductase activity	48	382	1691	28397	1.3e-06	0.00013	// AT4G13290 // AT4G15560 // AT1G06090 // AT5G65165 // AT2G34790 // AT1G06820 // AT4G11290 // AT1G14810 // AT2G25450 // AT1G55380 // AT2G39800 // AT5G57260 // AT3G26550 // AT1G67110 // AT2G46950 // AT5G14780 // AT3G07000 // AT4G34350 // AT1G76080 // AT2G02700 // AT5G01040 // AT1G32100 // AT5G54080 // AT3G45300 // AT2G27010 // AT1G60680 // AT1G30100 // AT5G03260 // AT1G06080 // AT2G46750 // AT1G64…
			GO:0003824	F	catalytic activity	158	382	8787	28397	1.2e-05	0.0006	// AT4G15560 // AT1G06820 // AT2G25450 // AT5G46450 // AT3G24240 // AT1G28650 // AT4G24480 // AT5G58350 // AT3G56080 // AT3G54940 // AT5G04230 // AT2G28630 // AT1G60190 // AT2G32950 // AT1G55140 // AT2G39350 // AT1G62710 // AT5G54080 // AT3G45300 // AT1G60680 // AT1G30100 // AT1G67110 // AT1G61860 // AT5G62480 // AT1G36340 // AT3G28345 // AT5G57050 // AT4G13280 // AT2G27420 // AT5G55250 // AT4G08…
			GO:0016705	F	oxidoreductase activity	acting on paired donors	with incorporation or reduction of molecular oxygen	18	382	462	28397	8.7e-05	0.0028	// AT4G13290 // AT5G57260 // AT2G46950 // AT1G06090 // AT1G06080 // AT2G34490 // AT1G77330 // AT3G20110 // AT1G12010 // AT2G25450 // AT3G49630 // AT3G46490 // AT1G64940 // AT1G48130 // AT2G27010 // AT3G14680 // AT1G67110 // AT1G43800
			GO:0008234	F	cysteine-type peptidase activity	8	382	108	28397	0.00016	0.0039	// AT5G04200 // AT4G16190 // AT3G54940 // AT4G35350 // AT4G11320 // AT1G62710 // AT2G27420 // AT3G20210
			GO:0046906	F	tetrapyrrole binding	15	382	407	28397	0.00058	0.011	// AT4G13290 // AT1G29930 // AT4G11290 // AT2G46950 // AT4G14690 // AT3G22840 // AT2G34490 // AT3G20110 // AT5G57260 // AT4G08770 // AT1G64940 // AT2G47770 // AT2G27010 // AT3G14680 // AT1G67110
			GO:0016787	F	hydrolase activity	61	382	3099	28397	0.0018	0.029	// AT1G54790 // AT5G20710 // AT4G16190 // AT5G57050 // AT4G37070 // AT5G59220 // AT5G14180 // AT5G46450 // AT4G01970 // AT1G28650 // AT1G11190 // AT4G11320 // AT4G16690 // AT4G18550 // AT2G39350 // AT3G48690 // AT2G28470 // AT3G21370 // AT1G14890 // AT3G54940 // AT3G47750 // AT1G26820 // AT5G59090 // AT3G11410 // AT2G27420 // AT1G55140 // AT1G73280 // AT3G03640 // AT1G55180 // AT4G19810 // AT4G35…
			GO:0045735	F	nutrient reservoir activity	5	382	67	28397	0.0027	0.037	// AT3G62020 // AT5G25610 // AT1G72610 // AT4G37070 // AT2G18540
			GO:0070011	F	peptidase activity	acting on L-amino acid peptides	15	382	519	28397	0.0056	0.055	// AT5G04200 // AT4G16190 // AT3G54940 // AT3G25740 // AT5G59090 // AT5G10770 // AT4G35350 // AT1G73300 // AT1G73280 // AT4G21650 // AT4G11320 // AT1G13270 // AT1G62710 // AT2G27420 // AT3G20210
			GO:0020037	F	heme binding	12	382	373	28397	0.0057	0.055	// AT4G13290 // AT4G11290 // AT2G46950 // AT1G67110 // AT2G34490 // AT3G20110 // AT5G57260 // AT4G08770 // AT1G64940 // AT2G47770 // AT3G14680 // AT2G27010
			GO:0005576	C	extracellular region	64	382	2824	28397	3.1e-05	0.0022	// AT1G72610 // AT5G20710 // AT4G16190 // AT5G25610 // AT3G51600 // AT1G28650 // AT4G11290 // AT1G21680 // AT3G53980 // AT5G14180 // AT2G28630 // AT3G47295 // AT5G06860 // AT4G11320 // AT1G73280 // AT4G11460 // AT4G37030 // AT2G28470 // AT4G22212 // AT1G65295 // AT1G67090 // AT3G54940 // AT3G15534 // AT1G26820 // AT5G59090 // AT4G35350 // AT2G13360 // AT5G01040 // AT1G14430 // AT3G03640 // AT1G54…
			GO:0000325	C	plant-type vacuole	7	382	100	28397	0.00057	0.021	// AT1G16390 // AT4G18425 // AT3G55120 // AT1G54000 // AT1G73190 // AT4G35350 // AT3G21550

## Sheet: 3-ES-ccr2 vs rccr2#155
Contra-regulated gene list in rccr2#155 when compared to ccr2 (ES)
Condition		DE Genes	rccr2#155-reg	ccr2-reg	Contra-reg
up only in rccr2#155		116	116
up in both, more in rccr2#155 vs ccr2 (>2FC)		1		1
up in both, ccr2 and rccr2#155 (<2FC)		11		11
up in both, less in rccr2#155 vs ccr2 (>2FC)		0			0
up only in ccr2		59			59
up in ccr2 and down in rccr2#155		3			3
down in ccr2 and up in rccr2#155		7			7
down only in ccr2		80			80
down in both, less in rccr2#155 vs ccr2 (>2FC)		0			0
down in both, ccr2 and rccr2#155 (<2FC)		19		19
down in both, more in rccr2#155 vs ccr2 (>2FC)		11		11
down only in rccr2#155		217	217
Total		524	333	42	149
gene description						relative to wt
gene	Locus.Identifier	Gene.Model.Name	Gene.Model.Description	Gene.Model.Type	Primary.Gene.Symbol	FC (ccr2/wt)	FC (rccr2#155/wt)	comparision to wt
AT4G22212	AT4G22212.1	Encodes a defensin-like (DEFL) family protein.	protein_coding			#N/A	11.9016	up only in rccr2#155
AT5G59090	AT5G59090.1	subtilase 4.12 (SBT4.12); FUNCTIONS IN: identical protein binding, serine-type endopeptidase activity; INVOLVED IN: proteolysis, negative regulation of catalytic activity; LOCATED IN: apoplast, nucleus, cytoplasm; EXPRESSED IN: 6 plant structures; CONTAINS InterPro DOMAIN/s: Protease-associated PA (InterPro:IPR003137), Peptidase S8/S53, subtilisin/kexin/sedolisin (InterPro:IPR000209), Peptidase S…	protein_coding	SUBTILASE 4.12 (SBT4.12)	SUBTILASE 4.12 (ATSBT4.12);SUBTILASE 4.12 (SBT4.12)	#N/A	2.78584	up only in rccr2#155
AT4G11460	AT4G11460.1	Encodes a cysteine-rich receptor-like protein kinase.	protein_coding	CYSTEINE-RICH RLK (RECEPTOR-LIKE PROTEIN KINASE) 30 (CRK30)	CYSTEINE-RICH RLK (RECEPTOR-LIKE PROTEIN KINASE) 30 (CRK30)	#N/A	21.3411	up only in rccr2#155
AT2G40330	AT2G40330.1	Encodes a member of the PYR (pyrabactin resistance )/PYL(PYR1-like)/RCAR (regulatory components of ABA receptor) family proteins with 14 members. PYR/PYL/RCAR family proteins function as abscisic acid sensors. Mediate ABA-dependent regulation of protein phosphatase 2Cs ABI1 and ABI2.	protein_coding	PYR1-LIKE 6 (PYL6)	PYR1-LIKE 6 (PYL6);REGULATORY COMPONENTS OF ABA RECEPTOR 9 (RCAR9)	#N/A	52.0921	up only in rccr2#155
AT1G11580	AT1G11580.1	methylesterase PCR A (PMEPCRA); FUNCTIONS IN: enzyme inhibitor activity, pectinesterase activity; INVOLVED IN: cell wall modification; LOCATED IN: cell wall, plasma membrane, plant-type cell wall; EXPRESSED IN: 25 plant structures; EXPRESSED DURING: 13 growth stages; CONTAINS InterPro DOMAIN/s: Pectinesterase, active site (InterPro:IPR018040), Pectin lyase fold/virulence factor (InterPro:IPR01105…	protein_coding	METHYLESTERASE PCR A (PMEPCRA)	(ATPMEPCRA);METHYLESTERASE PCR A (PMEPCRA)	#N/A	2.41451	up only in rccr2#155
AT3G20110	AT3G20110.1	member of CYP705A	protein_coding	"CYTOCHROME P450, FAMILY 705, SUBFAMILY A, POLYPEPTIDE 20" (CYP705A20)	"CYTOCHROME P450, FAMILY 705, SUBFAMILY A, POLYPEPTIDE 20" (CYP705A20)	#N/A	11.5257	up only in rccr2#155
AT1G13270	AT1G13270.1	Encodes a methionine aminopeptidase formerly called MAP1B, renamed to MAP1C.	protein_coding	METHIONINE AMINOPEPTIDASE 1B (MAP1C)	METHIONINE AMINOPEPTIDASE 1B (MAP1B);METHIONINE AMINOPEPTIDASE 1B (MAP1C)	#N/A	2.63255	up only in rccr2#155
AT4G08770	AT4G08770.1	Encodes a putative apoplastic peroxidase Prx37. Primarily expressed in the vascular bundles. Overexpression renders a dwarf phenotype with smaller plants and delayed development. Plants overexpressing Prx37 also shows an increase in the amount of esterified phenolic material associated with their walls.	protein_coding	PEROXIDASE 37 (Prx37)	PEROXIDASE 37 (Prx37)	#N/A	10.5795	up only in rccr2#155
AT4G17870	AT4G17870.1	Encodes a member of the PYR (pyrabactin resistance )/PYL(PYR1-like)/RCAR (regulatory components of ABA receptor) family proteins with 14 members. PYR/PYL/RCAR family proteins function as abscisic acid sensors. Mediate ABA-dependent regulation of protein phosphatase 2Cs ABI1 and ABI2.	protein_coding	PYRABACTIN RESISTANCE 1 (PYR1)	REGULATORY COMPONENT OF ABA RECEPTOR 11 (RCAR11);PYRABACTIN RESISTANCE 1 (PYR1)	#N/A	2.5439	up only in rccr2#155
AT2G28630	AT2G28630.1	Encodes KCS12, a member of the 3-ketoacyl-CoA synthase family involved in the biosynthesis of VLCFA (very long chain fatty acids).	protein_coding	3-KETOACYL-COA SYNTHASE 12 (KCS12)	3-KETOACYL-COA SYNTHASE 12 (KCS12)	#N/A	3.66086	up only in rccr2#155
AT5G53048	AT5G53048.1	Potential natural antisense gene, locus overlaps with AT5G53050	other_rna			#N/A	10.9699	up only in rccr2#155
AT1G55380	AT1G55380.1	Cysteine/Histidine-rich C1 domain family protein; CONTAINS InterPro DOMAIN/s: DC1 (InterPro:IPR004146), C1-like (InterPro:IPR011424); BEST Arabidopsis thaliana protein match is: Cysteine/Histidine-rich C1 domain family protein (TAIR:AT1G55420.1); Has 40762 Blast hits to 3420 proteins in 277 species: Archae - 16; Bacteria - 33283; Metazoa - 2053; Fungi - 735; Plants - 1877; Viruses - 86; Other Euk…	protein_coding			#N/A	9.75684	up only in rccr2#155
AT5G20150	AT5G20150.1	Expression is upregulated in the shoot of cax1/cax3 mutant.	protein_coding	SPX DOMAIN GENE 1 (SPX1)	SPX DOMAIN GENE 1 (SPX1);ARABIDOPSIS THALIANA SPX DOMAIN GENE 1 (ATSPX1)	#N/A	2.62186	up only in rccr2#155
AT2G43140	AT2G43140.2	basic helix-loop-helix (bHLH) DNA-binding superfamily protein; FUNCTIONS IN: DNA binding, sequence-specific DNA binding transcription factor activity; INVOLVED IN: regulation of transcription; LOCATED IN: nucleus; EXPRESSED IN: root; CONTAINS InterPro DOMAIN/s: Helix-loop-helix DNA-binding domain (InterPro:IPR001092), Helix-loop-helix DNA-binding (InterPro:IPR011598); BEST Arabidopsis thaliana pr…	protein_coding			#N/A	9.19117	up only in rccr2#155
AT3G49630	AT3G49630.1	2-oxoglutarate (2OG) and Fe(II)-dependent oxygenase superfamily protein; FUNCTIONS IN: oxidoreductase activity, iron ion binding; INVOLVED IN: aging, cellular response to starvation; LOCATED IN: endomembrane system; EXPRESSED IN: stem, root, carpel; EXPRESSED DURING: petal differentiation and expansion stage; CONTAINS InterPro DOMAIN/s: Isopenicillin N synthase (InterPro:IPR002283), Oxoglutarate/…	protein_coding			#N/A	7.46728	up only in rccr2#155
AT4G21870	AT4G21870.1	HSP20-like chaperones superfamily protein; CONTAINS InterPro DOMAIN/s: Heat shock protein Hsp20 (InterPro:IPR002068), HSP20-like chaperone (InterPro:IPR008978); BEST Arabidopsis thaliana protein match is: HSP20-like chaperones superfamily protein (TAIR:AT1G53540.1); Has 2331 Blast hits to 2331 proteins in 523 species: Archae - 47; Bacteria - 802; Metazoa - 2; Fungi - 44; Plants - 1239; Viruses - …	protein_coding			#N/A	6.13272	up only in rccr2#155
AT1G67110	AT1G67110.1	member of CYP709A	protein_coding	"CYTOCHROME P450, FAMILY 735, SUBFAMILY A, POLYPEPTIDE 2" (CYP735A2)	"CYTOCHROME P450, FAMILY 735, SUBFAMILY A, POLYPEPTIDE 2" (CYP735A2)	#N/A	6.99009	up only in rccr2#155
AT3G05730	AT3G05730.1	Encodes a defensin-like (DEFL) family protein.	protein_coding			#N/A	4.44372	up only in rccr2#155
AT3G16080	AT3G16080.1	Zinc-binding ribosomal protein family protein; FUNCTIONS IN: structural constituent of ribosome; INVOLVED IN: translation, ribosome biogenesis; LOCATED IN: ribosome, cytosolic large ribosomal subunit; EXPRESSED IN: 24 plant structures; EXPRESSED DURING: 13 growth stages; CONTAINS InterPro DOMAIN/s: Ribosomal protein L37e, conserved site (InterPro:IPR018267), Ribosomal protein, zinc-binding domain…	protein_coding			#N/A	2.03855	up only in rccr2#155
AT2G27720	AT2G27720.2	60S acidic ribosomal protein family; FUNCTIONS IN: structural constituent of ribosome; INVOLVED IN: translational elongation, response to cold; LOCATED IN: cytosol, cytosolic ribosome, ribosome, nucleus; EXPRESSED IN: 24 plant structures; EXPRESSED DURING: 13 growth stages; CONTAINS InterPro DOMAIN/s: Ribosomal protein 60S (InterPro:IPR001813); BEST Arabidopsis thaliana protein match is: 60S acid…	protein_coding			#N/A	2.05346	up only in rccr2#155
AT1G14810	AT1G14810.1	encodes an aspartate semialdehyde dehydrogenase, which produces the branch point intermediate for lysine and threonine/methionine biosynthesis	protein_coding			#N/A	2.23355	up only in rccr2#155
AT1G59780	AT1G59780.1	NB-ARC domain-containing disease resistance protein; FUNCTIONS IN: ATP binding; INVOLVED IN: defense response, apoptosis; LOCATED IN: cellular_component unknown; EXPRESSED IN: hypocotyl, root, flower, synergid; EXPRESSED DURING: 4 anthesis; CONTAINS InterPro DOMAIN/s: NB-ARC (InterPro:IPR002182), Disease resistance protein (InterPro:IPR000767); BEST Arabidopsis thaliana protein match is: Disease …	protein_coding			#N/A	3.78608	up only in rccr2#155
AT2G35270	AT2G35270.1	Direct target of AGAMOUS. Regulates patterning and differentiation of reproductive organs.	protein_coding	GIANT KILLER (GIK)	GIANT KILLER (GIK)	#N/A	7.20091	up only in rccr2#155
AT3G62110	AT3G62110.1	Pectin lyase-like superfamily protein; FUNCTIONS IN: polygalacturonase activity; INVOLVED IN: response to cyclopentenone, carbohydrate metabolic process; LOCATED IN: vacuole; EXPRESSED IN: 25 plant structures; EXPRESSED DURING: 15 growth stages; CONTAINS InterPro DOMAIN/s: Pectin lyase fold/virulence factor (InterPro:IPR011050), Glycoside hydrolase, family 28 (InterPro:IPR000743), Pectin lyase fo…	protein_coding			#N/A	2.00241	up only in rccr2#155
AT4G18290	AT4G18290.1	Encodes KAT2, a member of the Shaker family potassium ion (K+) channel. Critical to stomatal opening induced by blue light. Critical to circadian rhythm of stomatal opening. Involved in plant development in response to high light intensity. Under high light intensity, the mutant plant produced less biomass compared to the wild type. The Shaker family K+ ion channels include five groups based on p…	protein_coding	POTASSIUM CHANNEL IN ARABIDOPSIS THALIANA 2 (KAT2)	POTASSIUM CHANNEL IN ARABIDOPSIS THALIANA 2 (KAT2)	#N/A	3.04892	up only in rccr2#155
AT5G35525	AT5G35525.1	PLAC8 family protein; CONTAINS InterPro DOMAIN/s: Protein of unknown function Cys-rich (InterPro:IPR006461); BEST Arabidopsis thaliana protein match is: PLANT CADMIUM RESISTANCE 2 (TAIR:AT1G14870.1); Has 35333 Blast hits to 34131 proteins in 2444 species: Archae - 798; Bacteria - 22429; Metazoa - 974; Fungi - 991; Plants - 531; Viruses - 0; Other Eukaryotes - 9610 (source: NCBI BLink).	protein_coding			#N/A	2.49624	up only in rccr2#155
AT2G27120	AT2G27120.1	Encodes a protein with similarity to DNA polymerase epsilon catalytic subunit. Based on yeast two hybrid analysis, not predicted to be a subunit of the DNA polymerase epsilon complex. No phenotype observed in homozygous mutant embryos or plants but in combination with TIL1-1/til1-1 heterozygotes arrest earlier than til1 homozygotes suggesting TIL2 functions redundantly with TIL1.	protein_coding	TILTED 2 (TIL2)	TILTED 2 (TIL2); (POL2B)	#N/A	4.61386	up only in rccr2#155
AT1G65295	AT1G65295.1	unknown protein; LOCATED IN: endomembrane system; EXPRESSED IN: 22 plant structures; EXPRESSED DURING: 13 growth stages; BEST Arabidopsis thaliana protein match is: unknown protein (TAIR:AT5G01015.1); Has 90 Blast hits to 90 proteins in 15 species: Archae - 0; Bacteria - 0; Metazoa - 0; Fungi - 0; Plants - 90; Viruses - 0; Other Eukaryotes - 0 (source: NCBI BLink).	protein_coding			#N/A	2.3745	up only in rccr2#155
AT2G27400	AT2G27400.1	Trans-acting siRNA1a primary transcript (TAS1a). Regulated by miR173.	other_rna	TRANS-ACTING SIRNA1A (TAS1A)	TRANS-ACTING SIRNA1A (TAS1A)	#N/A	2.2864	up only in rccr2#155
AT4G18460	AT4G18460.1	D-Tyr-tRNA(Tyr) deacylase family protein; FUNCTIONS IN: hydrolase activity, acting on ester bonds; INVOLVED IN: D-amino acid catabolic process; LOCATED IN: cytoplasm; EXPRESSED IN: 16 plant structures; EXPRESSED DURING: 13 growth stages; CONTAINS InterPro DOMAIN/s: D-tyrosyl-tRNA(Tyr) deacylase (InterPro:IPR003732); Has 30201 Blast hits to 17322 proteins in 780 species: Archae - 12; Bacteria - 13…	protein_coding			#N/A	3.58977	up only in rccr2#155
AT2G43910	AT2G43910.2	HARMLESS TO OZONE LAYER 1 (HOL1); FUNCTIONS IN: methyltransferase activity, thiopurine S-methyltransferase activity; INVOLVED IN: metabolic process; LOCATED IN: plasma membrane; EXPRESSED IN: guard cell, cultured cell, leaf; CONTAINS InterPro DOMAIN/s: Thiopurine S-methyltransferase (InterPro:IPR008854); BEST Arabidopsis thaliana protein match is: S-adenosyl-L-methionine-dependent methyltransfera…	protein_coding	HARMLESS TO OZONE LAYER 1 (HOL1)	HARMLESS TO OZONE LAYER 1 (HOL1); (ATHOL1)	#N/A	2.09258	up only in rccr2#155
AT3G59670	AT3G59670.1	unknown protein; BEST Arabidopsis thaliana protein match is: unknown protein (TAIR:AT4G37440.2); Has 77 Blast hits to 77 proteins in 14 species: Archae - 0; Bacteria - 0; Metazoa - 0; Fungi - 0; Plants - 73; Viruses - 0; Other Eukaryotes - 4 (source: NCBI BLink).	protein_coding			#N/A	2.09696	up only in rccr2#155
AT3G51600	AT3G51600.1	Predicted to encode a PR (pathogenesis-related) protein. Belongs to the lipid transfer protein (PR-14) family with the following members: At2g38540/LTP1, At2g38530/LTP2, At5g59320/LTP3, At5g59310/LTP4, At3g51600/LTP5, At3g08770/LTP6, At2g15050/LTP7, At2g18370/LTP8, At2g15325/LTP9, At5g01870/LTP10, At4g33355/LTP11, At3g51590/LTP12, At5g44265/LTP13, At5g62065/LTP14, At4g08530/LTP15.	protein_coding	LIPID TRANSFER PROTEIN 5 (LTP5)	LIPID TRANSFER PROTEIN 5 (LTP5)	#N/A	2.01728	up only in rccr2#155
AT1G30100	AT1G30100.1	Encodes 9-cis-epoxycarotenoid dioxygenase, a key enzyme in the biosynthesis of abscisic acid. The expression of this gene increases during the first 6h of imbibition.	protein_coding	NINE-CIS-EPOXYCAROTENOID DIOXYGENASE 5 (NCED5)	NINE-CIS-EPOXYCAROTENOID DIOXYGENASE 5 (ATNCED5);NINE-CIS-EPOXYCAROTENOID DIOXYGENASE 5 (NCED5)	#N/A	8.46343	up only in rccr2#155
AT5G37970	AT5G37970.1	S-adenosyl-L-methionine-dependent methyltransferases superfamily protein; FUNCTIONS IN: S-adenosylmethionine-dependent methyltransferase activity, methyltransferase activity; INVOLVED IN: biological_process unknown; EXPRESSED IN: 6 plant structures; EXPRESSED DURING: M germinated pollen stage, 4 anthesis, petal differentiation and expansion stage; CONTAINS InterPro DOMAIN/s: SAM dependent carboxy…	protein_coding			#N/A	6.22923	up only in rccr2#155
AT4G25050	AT4G25050.2	encodes an acyl carrier protein predominantly expressed in leaves. Gene expression is upregulated by light.	protein_coding	ACYL CARRIER PROTEIN 4 (ACP4)	ACYL CARRIER PROTEIN 4 (ACP4)	#N/A	2.46486	up only in rccr2#155
AT2G31110	AT2G31110.2	Encodes a member of the TBL (TRICHOME BIREFRINGENCE-LIKE) gene family containing a plant-specific DUF231 (domain of unknown function) domain. TBL gene family has 46 members, two of which (TBR/AT5G06700 and TBL3/AT5G01360) have been shown to be involved in the synthesis and deposition of secondary wall cellulose, presumably by influencing the esterification state of pectic polymers. A nomenclature…	protein_coding			#N/A	3.04867	up only in rccr2#155
AT1G60680	AT1G60680.1	NAD(P)-linked oxidoreductase superfamily protein; FUNCTIONS IN: oxidoreductase activity, aldo-keto reductase activity; INVOLVED IN: oxidation reduction; EXPRESSED IN: hypocotyl, root; CONTAINS InterPro DOMAIN/s: Aldo/keto reductase (InterPro:IPR001395), Aldo/keto reductase subgroup (InterPro:IPR020471); BEST Arabidopsis thaliana protein match is: NAD(P)-linked oxidoreductase superfamily protein (…	protein_coding		ARF-GAP DOMAIN 2 (AGD2)	#N/A	2.14571	up only in rccr2#155
AT1G12010	AT1G12010.1	Encodes a protein that appears to have 1-amino-cyclopropane-1-carboxylic acid oxidase activity based on mutant analyses.	protein_coding			#N/A	6.98546	up only in rccr2#155
AT5G04230	AT5G04230.2	Member of Phenylalanine ammonialyase (PAL) gene family. Differs significantly from PAL1 and PAL2 and other sequenced plant PAL genes. Arabidopsis has four PALs: AT2G37040 (PAL1), AT3G53260 (PAL2), AT5G04230 (PAL3) and AT3G10340 (PAL4).	protein_coding	PHENYL ALANINE AMMONIA-LYASE 3 (PAL3)	PHENYL ALANINE AMMONIA-LYASE 3 (PAL3)	#N/A	2.19024	up only in rccr2#155
AT3G47570	AT3G47570.1	Leucine-rich repeat protein kinase family protein; FUNCTIONS IN: protein serine/threonine kinase activity, kinase activity, ATP binding; INVOLVED IN: transmembrane receptor protein tyrosine kinase signaling pathway, protein amino acid phosphorylation; LOCATED IN: plasma membrane; EXPRESSED IN: 13 plant structures; EXPRESSED DURING: 8 growth stages; CONTAINS InterPro DOMAIN/s: Protein kinase, ATP …	protein_coding			#N/A	2.55456	up only in rccr2#155
AT1G71400	AT1G71400.1	Encodes a CLAVATA2 (CLV2)-related gene. Complements the clv2 mutant when expressed under the control of the CLV2 promoter.	protein_coding	RECEPTOR LIKE PROTEIN 12 (RLP12)	RECEPTOR LIKE PROTEIN 12 (AtRLP12);RECEPTOR LIKE PROTEIN 12 (RLP12)	#N/A	3.05263	up only in rccr2#155
AT3G45840	AT3G45840.1	Cysteine/Histidine-rich C1 domain family protein; FUNCTIONS IN: zinc ion binding; INVOLVED IN: biological_process unknown; LOCATED IN: cellular_component unknown; CONTAINS InterPro DOMAIN/s: Zinc finger, PHD-type, conserved site (InterPro:IPR019786), DC1 (InterPro:IPR004146), Zinc finger, PHD-type (InterPro:IPR001965), C1-like (InterPro:IPR011424); BEST Arabidopsis thaliana protein match is: Cyst…	protein_coding			#N/A	2.76854	up only in rccr2#155
AT4G38100	AT4G38100.1	unknown protein; LOCATED IN: chloroplast thylakoid membrane; EXPRESSED IN: 23 plant structures; EXPRESSED DURING: 13 growth stages; BEST Arabidopsis thaliana protein match is: unknown protein (TAIR:AT4G01150.1); Has 30201 Blast hits to 17322 proteins in 780 species: Archae - 12; Bacteria - 1396; Metazoa - 17338; Fungi - 3422; Plants - 5037; Viruses - 0; Other Eukaryotes - 2996 (source: NCBI BLink…	protein_coding			#N/A	2.10546	up only in rccr2#155
AT3G49740	AT3G49740.1	Tetratricopeptide repeat (TPR)-like superfamily protein; FUNCTIONS IN: binding; INVOLVED IN: biological_process unknown; EXPRESSED IN: 18 plant structures; EXPRESSED DURING: 11 growth stages; CONTAINS InterPro DOMAIN/s: Pentatricopeptide repeat (InterPro:IPR002885), Tetratricopeptide-like helical (InterPro:IPR011990); BEST Arabidopsis thaliana protein match is: Pentatricopeptide repeat (PPR) supe…	protein_coding			#N/A	3.76605	up only in rccr2#155
AT4G11210	AT4G11210.1	Disease resistance-responsive (dirigent-like protein) family protein; FUNCTIONS IN: molecular_function unknown; INVOLVED IN: lignan biosynthetic process, defense response; LOCATED IN: endomembrane system; EXPRESSED IN: leaf lamina base, petal, hypocotyl, cauline leaf, root; EXPRESSED DURING: 4 anthesis; CONTAINS InterPro DOMAIN/s: Plant disease resistance response protein (InterPro:IPR004265); BE…	protein_coding			#N/A	3.80726	up only in rccr2#155
AT4G33865	AT4G33865.1	Ribosomal protein S14p/S29e family protein; FUNCTIONS IN: structural constituent of ribosome; INVOLVED IN: translation; LOCATED IN: cytosolic small ribosomal subunit, ribosome; EXPRESSED IN: 24 plant structures; EXPRESSED DURING: 14 growth stages; CONTAINS InterPro DOMAIN/s: Ribosomal protein S14 (InterPro:IPR001209); BEST Arabidopsis thaliana protein match is: Ribosomal protein S14p/S29e family …	protein_coding			#N/A	2.13514	up only in rccr2#155
AT1G14210	AT1G14210.1	Ribonuclease T2 family protein; FUNCTIONS IN: ribonuclease T2 activity, endoribonuclease activity, RNA binding; INVOLVED IN: response to salt stress; LOCATED IN: endomembrane system; EXPRESSED IN: 22 plant structures; EXPRESSED DURING: 13 growth stages; CONTAINS InterPro DOMAIN/s: Ribonuclease T2 (InterPro:IPR001568), Ribonuclease T2, active site (InterPro:IPR018188); BEST Arabidopsis thaliana pr…	protein_coding			#N/A	2.28307	up only in rccr2#155
AT1G47840	AT1G47840.1	Encodes a putative hexokinase.	protein_coding	HEXOKINASE 3 (HXK3)	HEXOKINASE 3 (HXK3)	#N/A	3.01764	up only in rccr2#155
AT4G19720	AT4G19720.1	Glycosyl hydrolase family protein with chitinase insertion domain; FUNCTIONS IN: cation binding, chitinase activity, hydrolase activity, hydrolyzing O-glycosyl compounds, catalytic activity; INVOLVED IN: carbohydrate metabolic process; LOCATED IN: cellular_component unknown; EXPRESSED IN: root; CONTAINS InterPro DOMAIN/s: Glycoside hydrolase, family 18, catalytic domain (InterPro:IPR001223), Chit…	protein_coding			#N/A	5.602	up only in rccr2#155
AT1G14430	AT1G14430.1	glyoxal oxidase-related protein; FUNCTIONS IN: molecular_function unknown; INVOLVED IN: biological_process unknown; LOCATED IN: endomembrane system; CONTAINS InterPro DOMAIN/s: Galactose oxidase/kelch, beta-propeller (InterPro:IPR011043), Galactose oxidase, beta-propeller (InterPro:IPR015916), Immunoglobulin E-set (InterPro:IPR014756), Glyoxal oxidase, N-terminal (InterPro:IPR009880), Domain of u…	protein_coding			#N/A	3.23709	up only in rccr2#155
AT3G07000	AT3G07000.1	Cysteine/Histidine-rich C1 domain family protein; FUNCTIONS IN: zinc ion binding; INVOLVED IN: intracellular signaling pathway; LOCATED IN: cellular_component unknown; EXPRESSED IN: hypocotyl, root; CONTAINS InterPro DOMAIN/s: Protein kinase C-like, phorbol ester/diacylglycerol binding (InterPro:IPR002219), DC1 (InterPro:IPR004146), Zinc finger, PHD-type (InterPro:IPR001965), C1-like (InterPro:IP…	protein_coding			#N/A	3.04452	up only in rccr2#155
AT4G14690	AT4G14690.1	Encodes an early light-induced protein. ELIPs are thought not to be directly involved in the synthesis and assembly of specific photosynthetic complexes, but rather affect the biogenesis of all chlorophyll-binding complexes. A study (PMID 17553115) has shown that the chlorophyll synthesis pathway was downregulated as a result of constitutive ELIP2 expression, leading to decreased chlorophyll avai…	protein_coding	EARLY LIGHT-INDUCIBLE PROTEIN 2 (ELIP2)	EARLY LIGHT-INDUCIBLE PROTEIN 2 (ELIP2)	#N/A	5.82447	up only in rccr2#155
AT3G46490	AT3G46490.1	2-oxoglutarate (2OG) and Fe(II)-dependent oxygenase superfamily protein; FUNCTIONS IN: oxidoreductase activity, acting on paired donors, with incorporation or reduction of molecular oxygen, 2-oxoglutarate as one donor, and incorporation of one atom each of oxygen into both donors, oxidoreductase activity, iron ion binding; INVOLVED IN: oxidation reduction, secondary metabolic process; LOCATED IN:…	protein_coding			#N/A	3.26445	up only in rccr2#155
AT3G22840	AT3G22840.1	Encodes an early light-inducible protein.	protein_coding	EARLY LIGHT-INDUCABLE PROTEIN (ELIP1)	EARLY LIGHT-INDUCABLE PROTEIN (ELIP1); (ELIP)	#N/A	8.62677	up only in rccr2#155
AT1G31200	AT1G31200.1	phloem protein 2-A9 (PP2-A9); BEST Arabidopsis thaliana protein match is: phloem protein 2-A10 (TAIR:AT1G10155.1); Has 128 Blast hits to 128 proteins in 20 species: Archae - 0; Bacteria - 0; Metazoa - 0; Fungi - 0; Plants - 128; Viruses - 0; Other Eukaryotes - 0 (source: NCBI BLink).	protein_coding	PHLOEM PROTEIN 2-A9 (PP2-A9)	PHLOEM PROTEIN 2-A9 (PP2-A9);PHLOEM PROTEIN 2-A9 (ATPP2-A9)	#N/A	5.04927	up only in rccr2#155
AT5G01040	AT5G01040.1	putative laccase, knockout mutant showed early flowering	protein_coding	LACCASE 8 (LAC8)	LACCASE 8 (LAC8)	#N/A	3.48253	up only in rccr2#155
AT4G11290	AT4G11290.1	Peroxidase superfamily protein; FUNCTIONS IN: peroxidase activity, heme binding; INVOLVED IN: response to oxidative stress, oxidation reduction; LOCATED IN: endomembrane system; EXPRESSED IN: 11 plant structures; EXPRESSED DURING: 7 growth stages; CONTAINS InterPro DOMAIN/s: Haem peroxidase (InterPro:IPR010255), Plant peroxidase (InterPro:IPR000823), Peroxidases heam-ligand binding site (InterPro…	protein_coding			#N/A	2.09888	up only in rccr2#155
AT4G34810	AT4G34810.1	SAUR-like auxin-responsive protein family ; CONTAINS InterPro DOMAIN/s: Auxin responsive SAUR protein (InterPro:IPR003676); BEST Arabidopsis thaliana protein match is: SAUR-like auxin-responsive protein family (TAIR:AT4G34790.1); Has 1331 Blast hits to 1316 proteins in 28 species: Archae - 0; Bacteria - 0; Metazoa - 0; Fungi - 0; Plants - 1330; Viruses - 0; Other Eukaryotes - 1 (source: NCBI BLin…	protein_coding			#N/A	4.31964	up only in rccr2#155
AT2G20450	AT2G20450.1	Ribosomal protein L14; FUNCTIONS IN: structural constituent of ribosome; INVOLVED IN: translation, ribosome biogenesis; LOCATED IN: ribosome, cytosolic large ribosomal subunit, endoplasmic reticulum, vacuole; EXPRESSED IN: 23 plant structures; EXPRESSED DURING: 13 growth stages; CONTAINS InterPro DOMAIN/s: Ribosomal protein L14 (InterPro:IPR002784); BEST Arabidopsis thaliana protein match is: Rib…	protein_coding			#N/A	2.1177	up only in rccr2#155
AT2G24645	AT2G24645.1	Transcriptional factor B3 family protein; FUNCTIONS IN: DNA binding; INVOLVED IN: regulation of transcription, DNA-dependent; CONTAINS InterPro DOMAIN/s: Transcriptional factor B3 (InterPro:IPR003340); BEST Arabidopsis thaliana protein match is: Transcriptional factor B3 family protein (TAIR:AT4G00260.1).	protein_coding			#N/A	4.95781	up only in rccr2#155
AT5G58750	AT5G58750.1	NAD(P)-binding Rossmann-fold superfamily protein; BEST Arabidopsis thaliana protein match is: NAD(P)-binding Rossmann-fold superfamily protein (TAIR:AT4G24220.2); Has 1807 Blast hits to 1807 proteins in 277 species: Archae - 0; Bacteria - 0; Metazoa - 736; Fungi - 347; Plants - 385; Viruses - 0; Other Eukaryotes - 339 (source: NCBI BLink).	protein_coding			#N/A	4.74372	up only in rccr2#155
AT5G19520	AT5G19520.1	mechanosensitive channel of small conductance-like 9 (MSL9); CONTAINS InterPro DOMAIN/s: Membrane protein, At2g17000, predicted (InterPro:IPR016688), Mechanosensitive ion channel MscS (InterPro:IPR006685), Like-Sm ribonucleoprotein (LSM)-related domain (InterPro:IPR010920); BEST Arabidopsis thaliana protein match is: mechanosensitive channel of small conductance-like 10 (TAIR:AT5G12080.3); Has 18…	protein_coding	MECHANOSENSITIVE CHANNEL OF SMALL CONDUCTANCE-LIKE 9 (MSL9)	MECHANOSENSITIVE CHANNEL OF SMALL CONDUCTANCE-LIKE 9 (MSL9); (ATMSL9)	#N/A	3.57813	up only in rccr2#155
AT1G10657	AT1G10657.1	Plant protein 1589 of unknown function; FUNCTIONS IN: molecular_function unknown; INVOLVED IN: biological_process unknown; LOCATED IN: cellular_component unknown; CONTAINS InterPro DOMAIN/s: Conserved hypothetical protein CHP01589, plant (InterPro:IPR006476); BEST Arabidopsis thaliana protein match is: Plant protein 1589 of unknown function (TAIR:AT3G55240.1); Has 115 Blast hits to 115 proteins i…	protein_coding			#N/A	9.39196	up only in rccr2#155
AT1G43800	AT1G43800.1	Plant stearoyl-acyl-carrier-protein desaturase family protein; FUNCTIONS IN: acyl-[acyl-carrier-protein] desaturase activity, oxidoreductase activity, transition metal ion binding; INVOLVED IN: oxidation reduction, fatty acid metabolic process, fatty acid biosynthetic process; LOCATED IN: membrane; EXPRESSED IN: 9 plant structures; EXPRESSED DURING: 6 growth stages; CONTAINS InterPro DOMAIN/s: Ri…	protein_coding	FLORAL TRANSITION AT THE MERISTEM1 (FTM1)	FLORAL TRANSITION AT THE MERISTEM1 (FTM1)	#N/A	8.20278	up only in rccr2#155
AT3G16280	AT3G16280.1	encodes a member of the DREB subfamily A-4 of ERF/AP2 transcription factor family. The protein contains one AP2 domain. There are 17 members in this subfamily including TINY.	protein_coding			#N/A	4.10365	up only in rccr2#155
AT3G52380	AT3G52380.1	chloroplast RNA-binding protein	protein_coding	CHLOROPLAST RNA-BINDING PROTEIN 33 (CP33)	CHLOROPLAST RNA-BINDING PROTEIN 33 (CP33);PIGMENT DEFECTIVE 322 (PDE322)	#N/A	2.02279	up only in rccr2#155
AT2G27420	AT2G27420.1	Cysteine proteinases superfamily protein; FUNCTIONS IN: cysteine-type peptidase activity, cysteine-type endopeptidase activity; INVOLVED IN: proteolysis; LOCATED IN: endomembrane system; EXPRESSED IN: 15 plant structures; EXPRESSED DURING: 10 growth stages; CONTAINS InterPro DOMAIN/s: Peptidase C1A, papain (InterPro:IPR013128), Proteinase inhibitor I29, cathepsin propeptide (InterPro:IPR013201), …	protein_coding			#N/A	6.42199	up only in rccr2#155
AT2G20020	AT2G20020.1	Promotes the splicing of chloroplast group II introns. Splices clpP-1 and ropC1 introns.	protein_coding	(CAF1)	(ATCAF1); (CAF1)	#N/A	2.09844	up only in rccr2#155
AT5G22440	AT5G22440.1	Ribosomal protein L1p/L10e family; FUNCTIONS IN: structural constituent of ribosome, RNA binding; INVOLVED IN: translation, RNA processing; LOCATED IN: cytosolic ribosome, ribosome, cytosolic large ribosomal subunit, nucleolus; EXPRESSED IN: 22 plant structures; EXPRESSED DURING: 13 growth stages; CONTAINS InterPro DOMAIN/s: Ribosomal protein L1 (InterPro:IPR002143), Ribosomal protein L1, 2-layer…	protein_coding			#N/A	2.0116	up only in rccr2#155
AT1G72610	AT1G72610.1	germin-like protein (GLP1)	protein_coding	GERMIN-LIKE PROTEIN 1 (GER1)	GERMIN-LIKE PROTEIN 1 (GER1);A. THALIANA GERMIN-LIKE PROTEIN 1 (ATGER1);GERMIN-LIKE PROTEIN 1 (GLP1)	#N/A	2.29757	up only in rccr2#155
AT5G43910	AT5G43910.2	pfkB-like carbohydrate kinase family protein; FUNCTIONS IN: kinase activity, ribokinase activity; INVOLVED IN: D-ribose metabolic process; LOCATED IN: cellular_component unknown; EXPRESSED IN: 19 plant structures; EXPRESSED DURING: 12 growth stages; CONTAINS InterPro DOMAIN/s: Carbohydrate/purine kinase (InterPro:IPR011611), Ribokinase (InterPro:IPR002139), Carbohydrate/puine kinase, PfkB, conser…	protein_coding			#N/A	2.36589	up only in rccr2#155
AT3G55120	AT3G55120.1	Catalyzes the conversion of chalcones into flavanones. Required for the accumulation of purple anthocyanins in leaves and stems. Co-expressed with CHS.	protein_coding	TRANSPARENT TESTA 5 (TT5)	(ATCHI);CHALCONE ISOMERASE (CHI);TRANSPARENT TESTA 5 (TT5); (A11);CHALCONE FLAVANONE ISOMERASE (CFI)	#N/A	3.09433	up only in rccr2#155
AT5G07900	AT5G07900.1	Mitochondrial transcription termination factor family protein; FUNCTIONS IN: molecular_function unknown; INVOLVED IN: biological_process unknown; LOCATED IN: membrane; EXPRESSED IN: 17 plant structures; EXPRESSED DURING: 11 growth stages; CONTAINS InterPro DOMAIN/s: Mitochodrial transcription termination factor-related (InterPro:IPR003690); BEST Arabidopsis thaliana protein match is: Mitochondria…	protein_coding			#N/A	2.15115	up only in rccr2#155
AT5G04310	AT5G04310.1	Pectin lyase-like superfamily protein; CONTAINS InterPro DOMAIN/s: Pectin lyase fold/virulence factor (InterPro:IPR011050), AmbAllergen (InterPro:IPR018082), Pectate lyase/Amb allergen (InterPro:IPR002022), Pectin lyase fold (InterPro:IPR012334); BEST Arabidopsis thaliana protein match is: Pectin lyase-like superfamily protein (TAIR:AT3G54920.1); Has 1753 Blast hits to 1747 proteins in 285 specie…	protein_coding			#N/A	2.4173	up only in rccr2#155
AT1G54000	AT1G54000.1	GDSL-like Lipase/Acylhydrolase superfamily protein; FUNCTIONS IN: lipase activity, hydrolase activity, acting on ester bonds, carboxylesterase activity; INVOLVED IN: lipid metabolic process; LOCATED IN: vacuolar membrane, plasma membrane, vacuole, plant-type cell wall, plant-type vacuole; EXPRESSED IN: stem, cultured cell, callus; EXPRESSED DURING: seedling growth; CONTAINS InterPro DOMAIN/s: Lip…	protein_coding	GDSL LIPASE-LIKE PROTEIN 22 (GLL22)	GDSL LIPASE-LIKE PROTEIN 22 (GLL22)	#N/A	8.23654	up only in rccr2#155
AT1G78860	AT1G78860.1	curculin-like (mannose-binding) lectin family protein, low similarity to Ser/Thr protein kinase (Zea mays) GI:2598067; contains Pfam profile PF01453: Lectin (probable mannose binding) but not the protein kinase domain of the Z. mays protein	protein_coding			#N/A	4.22925	up only in rccr2#155
AT3G47750	AT3G47750.1	member of ATH subfamily	protein_coding	ATP-BINDING CASSETTE A4 (ABCA4)	ATP-BINDING CASSETTE A4 (ABCA4); (ATATH3)	#N/A	2.3163	up only in rccr2#155
AT5G38344	AT5G38344.1	Toll-Interleukin-Resistance (TIR) domain family protein; FUNCTIONS IN: transmembrane receptor activity; INVOLVED IN: signal transduction, innate immune response; LOCATED IN: intrinsic to membrane, endomembrane system; CONTAINS InterPro DOMAIN/s: Toll-Interleukin receptor (InterPro:IPR000157); BEST Arabidopsis thaliana protein match is: Disease resistance protein (TIR-NBS-LRR class) family (TAIR:A…	protein_coding			#N/A	5.43996	up only in rccr2#155
AT1G51805	AT1G51805.1	Leucine-rich repeat protein kinase family protein; FUNCTIONS IN: protein serine/threonine kinase activity, protein kinase activity, kinase activity, ATP binding; INVOLVED IN: protein amino acid phosphorylation; LOCATED IN: endomembrane system; EXPRESSED IN: 20 plant structures; EXPRESSED DURING: 13 growth stages; CONTAINS InterPro DOMAIN/s: Protein kinase, ATP binding site (InterPro:IPR017441), P…	protein_coding			#N/A	4.58612	up only in rccr2#155
AT5G25500	AT5G25500.1	unknown protein; Has 1807 Blast hits to 1807 proteins in 277 species: Archae - 0; Bacteria - 0; Metazoa - 736; Fungi - 347; Plants - 385; Viruses - 0; Other Eukaryotes - 339 (source: NCBI BLink).	protein_coding			#N/A	2.90089	up only in rccr2#155
AT5G49170	AT5G49170.1	unknown protein; BEST Arabidopsis thaliana protein match is: unknown protein (TAIR:AT3G06840.1); Has 1807 Blast hits to 1807 proteins in 277 species: Archae - 0; Bacteria - 0; Metazoa - 736; Fungi - 347; Plants - 385; Viruses - 0; Other Eukaryotes - 339 (source: NCBI BLink).	protein_coding			#N/A	2.62235	up only in rccr2#155
AT4G23770	AT4G23770.1	unknown protein; BEST Arabidopsis thaliana protein match is: unknown protein (TAIR:AT4G23780.1); Has 17 Blast hits to 17 proteins in 6 species: Archae - 0; Bacteria - 2; Metazoa - 0; Fungi - 0; Plants - 13; Viruses - 0; Other Eukaryotes - 2 (source: NCBI BLink).	protein_coding			#N/A	5.0929	up only in rccr2#155
AT1G76080	AT1G76080.1	Encodes a thioredoxin localized in chloroplast stroma. Known as CDSP32 (CHLOROPLASTIC DROUGHT-INDUCED STRESS PROTEIN OF 32 KD).	protein_coding	CHLOROPLASTIC DROUGHT-INDUCED STRESS PROTEIN OF 32 KD (CDSP32)	CHLOROPLASTIC DROUGHT-INDUCED STRESS PROTEIN OF 32 KD (CDSP32);ARABIDOPSIS THALIANA CHLOROPLASTIC DROUGHT-INDUCED STRESS PROTEIN OF 32 KD (ATCDSP32)	#N/A	3.44816	up only in rccr2#155
AT2G18910	AT2G18910.1	hydroxyproline-rich glycoprotein family protein; Has 87 Blast hits to 67 proteins in 17 species: Archae - 0; Bacteria - 4; Metazoa - 0; Fungi - 0; Plants - 77; Viruses - 2; Other Eukaryotes - 4 (source: NCBI BLink).	protein_coding			#N/A	2.43648	up only in rccr2#155
AT2G18360	AT2G18360.1	alpha/beta-Hydrolases superfamily protein; FUNCTIONS IN: hydrolase activity; LOCATED IN: endomembrane system; EXPRESSED IN: shoot apex, hypocotyl, root, leaf; CONTAINS InterPro DOMAIN/s: Alpha/beta hydrolase fold-1 (InterPro:IPR000073); BEST Arabidopsis thaliana protein match is: alpha/beta-Hydrolases superfamily protein (TAIR:AT4G36610.1); Has 8797 Blast hits to 8792 proteins in 1517 species: Ar…	protein_coding			#N/A	4.3548	up only in rccr2#155
AT2G14660	AT2G14660.1	unknown protein; CONTAINS InterPro DOMAIN/s: Uncharacterised protein family UPF0310 (InterPro:IPR002740); Has 2761 Blast hits to 2761 proteins in 686 species: Archae - 5; Bacteria - 1143; Metazoa - 73; Fungi - 78; Plants - 42; Viruses - 0; Other Eukaryotes - 1420 (source: NCBI BLink).	protein_coding			#N/A	3.79917	up only in rccr2#155
AT1G73280	AT1G73280.1	serine carboxypeptidase-like 3 (scpl3); FUNCTIONS IN: serine-type carboxypeptidase activity; INVOLVED IN: proteolysis; LOCATED IN: endomembrane system; EXPRESSED IN: root; CONTAINS InterPro DOMAIN/s: Peptidase S10, serine carboxypeptidase (InterPro:IPR001563); BEST Arabidopsis thaliana protein match is: serine carboxypeptidase-like 2 (TAIR:AT1G73300.1); Has 3958 Blast hits to 3843 proteins in 445…	protein_coding	SERINE CARBOXYPEPTIDASE-LIKE 3 (scpl3)	SERINE CARBOXYPEPTIDASE-LIKE 3 (scpl3)	#N/A	4.41534	up only in rccr2#155
AT4G13220	AT4G13220.1	unknown protein; FUNCTIONS IN: molecular_function unknown; INVOLVED IN: biological_process unknown; LOCATED IN: chloroplast; EXPRESSED IN: 22 plant structures; EXPRESSED DURING: 13 growth stages; Has 27 Blast hits to 27 proteins in 10 species: Archae - 0; Bacteria - 0; Metazoa - 0; Fungi - 0; Plants - 27; Viruses - 0; Other Eukaryotes - 0 (source: NCBI BLink).	protein_coding			#N/A	2.10309	up only in rccr2#155
AT2G02700	AT2G02700.1	Cysteine/Histidine-rich C1 domain family protein; FUNCTIONS IN: zinc ion binding; LOCATED IN: cellular_component unknown; CONTAINS InterPro DOMAIN/s: DC1 (InterPro:IPR004146), Zinc finger, PHD-type (InterPro:IPR001965), C1-like (InterPro:IPR011424); BEST Arabidopsis thaliana protein match is: Cysteine/Histidine-rich C1 domain family protein (TAIR:AT2G02680.1); Has 1502 Blast hits to 579 proteins …	protein_coding			#N/A	4.41366	up only in rccr2#155
AT1G14410	AT1G14410.1	Encodes a homolog of the potato p24 protein. Binds single strand telomeric repeats. Negatively regulates telomerase activity and telomere length.	protein_coding	WHIRLY 1 (WHY1)	WHIRLY 1 (WHY1);A. THALIANA WHIRLY 1 (ATWHY1); (PTAC1)	#N/A	2.354	up only in rccr2#155
AT2G47240	AT2G47240.1	Encodes an acyl-CoA synthetase that acts on long-chain and very-long-chain fatty acids, involved in cuticular wax and cutin biosynthesis	protein_coding	LONG-CHAIN ACYL-COA SYNTHASE 1 (LACS1)	(CER8);ECERIFERUM 8 (CER8);LONG-CHAIN ACYL-COA SYNTHASE 1 (LACS1)	#N/A	2.24868	up only in rccr2#155
AT3G56020	AT3G56020.1	Ribosomal protein L41 family; FUNCTIONS IN: structural constituent of ribosome; INVOLVED IN: translation; LOCATED IN: ribosome, cytosolic large ribosomal subunit; CONTAINS InterPro DOMAIN/s: Ribosomal protein L41 (InterPro:IPR007836); Has 185 Blast hits to 185 proteins in 75 species: Archae - 0; Bacteria - 0; Metazoa - 88; Fungi - 40; Plants - 48; Viruses - 0; Other Eukaryotes - 9 (source: NCBI B…	protein_coding			#N/A	2.00698	up only in rccr2#155
AT4G01540	AT4G01540.1	Encodes a membrane-bound NAC (for NAM, ATAF1/2, CUC2) transcription factor, designated NTM1 (for NAC with transmembrane motif1). NTM1 regulates cell division in Arabidopsis.	protein_coding	NAC WITH TRANSMEMBRANE MOTIF1 (NTM1)	ARABIDOPSIS NAC DOMAIN CONTAINING PROTEIN 68 (ANAC068);NAC WITH TRANSMEMBRANE MOTIF1 (NTM1)	#N/A	7.54843	up only in rccr2#155
AT1G24020	AT1G24020.1	MLP-like protein 423 (MLP423); INVOLVED IN: response to biotic stimulus, defense response; LOCATED IN: membrane; EXPRESSED IN: 23 plant structures; EXPRESSED DURING: 15 growth stages; CONTAINS InterPro DOMAIN/s: Bet v I allergen (InterPro:IPR000916); BEST Arabidopsis thaliana protein match is: MLP-like protein 28 (TAIR:AT1G70830.3); Has 1440 Blast hits to 1404 proteins in 125 species: Archae - 0;…	protein_coding	MLP-LIKE PROTEIN 423 (MLP423)	MLP-LIKE PROTEIN 423 (MLP423)	#N/A	5.25466	up only in rccr2#155
AT2G04030	AT2G04030.1	Encodes a chloroplast-targeted 90-kDa heat shock protein located in the stroma involved in red-light mediated deetiolation response. Mutants are resistant to chlorate, have elongated hypocotyls in light, and affect the expression of NR2, CAB, and RBCS but NOT NR1 and NiR.	protein_coding	(CR88)	HEAT SHOCK PROTEIN 88.1 (Hsp88.1);HEAT SHOCK PROTEIN 90.5 (HSP90.5);EMBRYO DEFECTIVE 1956 (emb1956);HEAT SHOCK PROTEIN 90.5 (AtHsp90.5); (CR88)	#N/A	2.63581	up only in rccr2#155
AT3G61770	AT3G61770.1	Acid phosphatase/vanadium-dependent haloperoxidase-related protein; FUNCTIONS IN: molecular_function unknown; INVOLVED IN: biological_process unknown; LOCATED IN: chloroplast; EXPRESSED IN: 22 plant structures; EXPRESSED DURING: 13 growth stages; CONTAINS InterPro DOMAIN/s: Acid phosphatase/vanadium-dependent haloperoxidase related (InterPro:IPR003832); BEST Arabidopsis thaliana protein match is:…	protein_coding			#N/A	2.08797	up only in rccr2#155
AT5G23770	AT5G23770.2	Member of the plant-specific DUF724 protein family. Arabidopsis has 10 DUF724 proteins. Loss of function mutant has a WT phenotype	protein_coding	DOMAIN OF UNKNOWN FUNCTION 724 8 (DUF8)	DOMAIN OF UNKNOWN FUNCTION 724 8 (DUF8)	#N/A	3.46289	up only in rccr2#155
AT4G13495	AT4G13495.1	Unknown gene	other_rna			#N/A	2.83341	up only in rccr2#155
AT1G16390	AT1G16390.1	organic cation/carnitine transporter 3 (3-Oct); FUNCTIONS IN: carbohydrate transmembrane transporter activity, sugar:hydrogen symporter activity; INVOLVED IN: transport, transmembrane transport; LOCATED IN: integral to membrane, membrane; EXPRESSED IN: 9 plant structures; EXPRESSED DURING: 6 growth stages; CONTAINS InterPro DOMAIN/s: Major facilitator superfamily (InterPro:IPR020846), General sub…	protein_coding	ORGANIC CATION/CARNITINE TRANSPORTER 3 (OCT3)	ORGANIC CATION/CARNITINE TRANSPORTER 3 (OCT3);ORGANIC CATION/CARNITINE TRANSPORTER 3 (ATOCT3)	#N/A	2.00308	up only in rccr2#155
AT2G44040	AT2G44040.1	Dihydrodipicolinate reductase, bacterial/plant; FUNCTIONS IN: dihydrodipicolinate reductase activity; INVOLVED IN: oxidation reduction, lysine biosynthetic process via diaminopimelate, metabolic process, diaminopimelate biosynthetic process; LOCATED IN: chloroplast; EXPRESSED IN: cotyledon; CONTAINS InterPro DOMAIN/s: Dihydrodipicolinate reductase, C-terminal (InterPro:IPR022663), NAD(P)-binding …	protein_coding			#N/A	3.03167	up only in rccr2#155
AT3G62270	AT3G62270.1	HCO3- transporter family; FUNCTIONS IN: anion exchanger activity; INVOLVED IN: anion transport; LOCATED IN: integral to membrane, membrane; EXPRESSED IN: 22 plant structures; EXPRESSED DURING: 13 growth stages; CONTAINS InterPro DOMAIN/s: Bicarbonate transporter, eukaryotic (InterPro:IPR003020), Bicarbonate transporter, C-terminal (InterPro:IPR011531); BEST Arabidopsis thaliana protein match is: …	protein_coding			#N/A	2.15397	up only in rccr2#155
AT5G38430	AT5G38430.1	Encodes a member of the Rubisco small subunit (RBCS) multigene family: RBCS1A (At1g67090), RBCS1B (At5g38430), RBCS2B (At5g38420), and RBCS3B (At5g38410).	protein_coding	RUBISCO SMALL SUBUNIT 1B (RBCS1B)	RUBISCO SMALL SUBUNIT 1B (RBCS1B)	#N/A	5.57376	up only in rccr2#155
AT1G27020	AT1G27020.1	unknown protein; BEST Arabidopsis thaliana protein match is: unknown protein (TAIR:AT1G27030.1); Has 514 Blast hits to 514 proteins in 175 species: Archae - 0; Bacteria - 311; Metazoa - 0; Fungi - 0; Plants - 65; Viruses - 0; Other Eukaryotes - 138 (source: NCBI BLink).	protein_coding			#N/A	4.90363	up only in rccr2#155
AT2G01913	AT2G01913.1	unknown protein; Has 35333 Blast hits to 34131 proteins in 2444 species: Archae - 798; Bacteria - 22429; Metazoa - 974; Fungi - 991; Plants - 531; Viruses - 0; Other Eukaryotes - 9610 (source: NCBI BLink).	protein_coding			#N/A	3.09218	up only in rccr2#155
AT1G55140	AT1G55140.1	Ribonuclease III family protein; FUNCTIONS IN: RNA binding, ribonuclease III activity; INVOLVED IN: RNA processing; LOCATED IN: chloroplast; CONTAINS InterPro DOMAIN/s: Ribonuclease III (InterPro:IPR000999); BEST Arabidopsis thaliana protein match is: Ribonuclease III family protein (TAIR:AT3G13740.1); Has 1541 Blast hits to 1540 proteins in 746 species: Archae - 0; Bacteria - 1385; Metazoa - 0; …	protein_coding			#N/A	2.06074	up only in rccr2#155
AT4G27030	AT4G27030.1	Encodes an unusual palmitate desaturase that is highly substrate specific. It introduces a delta-3 trans double bond at palmitate at the sn-2 position of phosphatidylglycerol.	protein_coding	FATTY ACID DESATURASE A (FADA)	FATTY ACID DESATURASE 4 (FAD4);FATTY ACID DESATURASE A (FADA); (FAD4)	#N/A	4.66609	up only in rccr2#155
AT2G46420	AT2G46420.1	Plant protein 1589 of unknown function; CONTAINS InterPro DOMAIN/s: Conserved hypothetical protein CHP01589, plant (InterPro:IPR006476); BEST Arabidopsis thaliana protein match is: Plant protein 1589 of unknown function (TAIR:AT3G61700.1); Has 251 Blast hits to 249 proteins in 29 species: Archae - 0; Bacteria - 0; Metazoa - 6; Fungi - 0; Plants - 223; Viruses - 0; Other Eukaryotes - 22 (source: N…	protein_coding			#N/A	2.15959	up only in rccr2#155
AT3G44590	AT3G44590.2	60S acidic ribosomal protein family; FUNCTIONS IN: structural constituent of ribosome; INVOLVED IN: translational elongation; LOCATED IN: cytosol, cytosolic ribosome, ribosome, nucleus; EXPRESSED IN: 25 plant structures; EXPRESSED DURING: 15 growth stages; CONTAINS InterPro DOMAIN/s: Ribosomal protein 60S (InterPro:IPR001813); BEST Arabidopsis thaliana protein match is: 60S acidic ribosomal prote…	protein_coding			#N/A	2.34736	up only in rccr2#155
AT5G46450	AT5G46450.1	Disease resistance protein (TIR-NBS-LRR class) family; FUNCTIONS IN: transmembrane receptor activity, nucleoside-triphosphatase activity, nucleotide binding, ATP binding; INVOLVED IN: signal transduction, defense response, apoptosis, innate immune response; LOCATED IN: intrinsic to membrane; EXPRESSED IN: 18 plant structures; EXPRESSED DURING: 11 growth stages; CONTAINS InterPro DOMAIN/s: ATPase,…	protein_coding			#N/A	2.59782	up only in rccr2#155
AT5G40160	AT5G40160.1	Encodes ankyrin repeat protein EMB506. Mutations in this locus result in embryo lethality.	protein_coding	EMBRYO DEFECTIVE 506 (EMB506)	EMBRYO DEFECTIVE 139 (EMB139);EMBRYO DEFECTIVE 506 (EMB506)	#N/A	2.06893	up only in rccr2#155
AT3G12965	AT3G12965.1	Unknown gene	other_rna			#N/A	2.23025	up only in rccr2#155
AT3G28460	AT3G28460.1	methyltransferases; FUNCTIONS IN: methyltransferase activity; INVOLVED IN: rRNA methylation; LOCATED IN: chloroplast; EXPRESSED IN: 21 plant structures; EXPRESSED DURING: 13 growth stages; CONTAINS InterPro DOMAIN/s: Conserved hypothetical protein CHP00095 (InterPro:IPR004398); Has 4869 Blast hits to 4869 proteins in 1755 species: Archae - 2; Bacteria - 3296; Metazoa - 0; Fungi - 0; Plants - 49; …	protein_coding			#N/A	2.04057	up only in rccr2#155
AT1G74730	AT1G74730.1	Protein of unknown function (DUF1118); FUNCTIONS IN: molecular_function unknown; INVOLVED IN: biological_process unknown; LOCATED IN: chloroplast thylakoid membrane, chloroplast; EXPRESSED IN: 21 plant structures; EXPRESSED DURING: 13 growth stages; CONTAINS InterPro DOMAIN/s: Protein of unknown function DUF1118 (InterPro:IPR009500); BEST Arabidopsis thaliana protein match is: Protein of unknown …	protein_coding			#N/A	2.14668	up only in rccr2#155
AT2G38310	AT2G38310.1	Encodes a member of the PYR (pyrabactin resistance )/PYL(PYR1-like)/RCAR (regulatory components of ABA receptor) family proteins with 14 members. PYR/PYL/RCAR family proteins function as abscisic acid sensors. Mediate ABA-dependent regulation of protein phosphatase 2Cs ABI1 and ABI2.	protein_coding	PYR1-LIKE 4 (PYL4)	PYR1-LIKE 4 (PYL4);REGULATORY COMPONENTS OF ABA RECEPTOR 10 (RCAR10)	#N/A	2.90039	up only in rccr2#155
AT3G59980	AT3G59980.1	Nucleic acid-binding, OB-fold-like protein; FUNCTIONS IN: tRNA binding; LOCATED IN: chloroplast; EXPRESSED IN: 22 plant structures; EXPRESSED DURING: 13 growth stages; CONTAINS InterPro DOMAIN/s: Nucleic acid-binding, OB-fold-like (InterPro:IPR016027), Nucleic acid-binding, OB-fold (InterPro:IPR012340), tRNA-binding domain (InterPro:IPR002547); BEST Arabidopsis thaliana protein match is: methioni…	protein_coding			#N/A	2.04442	up only in rccr2#155
AT3G13760	AT3G13760.1	Cysteine/Histidine-rich C1 domain family protein; FUNCTIONS IN: zinc ion binding; LOCATED IN: membrane; EXPRESSED IN: root, leaf; CONTAINS InterPro DOMAIN/s: DC1 (InterPro:IPR004146), Zinc finger, PHD-type (InterPro:IPR001965), C1-like (InterPro:IPR011424); BEST Arabidopsis thaliana protein match is: Cysteine/Histidine-rich C1 domain family protein (TAIR:AT1G35610.1); Has 1382 Blast hits to 598 p…	protein_coding			5.17261	11.8565	up in both, more in rccr2#155 vs ccr2 (>2FC)
AT1G06820	AT1G06820.1	Encodes carotenoid isomerase. Catalyzes the isomerization of poly-cis-carotenoids to all-trans-carotenoids. Together with PDS and ZDS, CRTiso is required to complete the synthesis of lycopene from phytoene.	protein_coding	CAROTENOID ISOMERASE (CRTISO)	CAROTENOID ISOMERASE (CRTISO);CAROTENOID AND CHLOROPLAST REGULATION 2 (CCR2)	5.92331	4.57933	up in both, ccr2 and rccr2#155 (<2FC)
AT1G14630	AT1G14630.1	unknown protein; BEST Arabidopsis thaliana protein match is: unknown protein (TAIR:AT2G01990.1); Has 125 Blast hits to 123 proteins in 14 species: Archae - 0; Bacteria - 0; Metazoa - 0; Fungi - 0; Plants - 125; Viruses - 0; Other Eukaryotes - 0 (source: NCBI BLink).	protein_coding			5.66666	6.62429	up in both, ccr2 and rccr2#155 (<2FC)
AT1G64320	AT1G64320.1	myosin heavy chain-related; FUNCTIONS IN: molecular_function unknown; INVOLVED IN: response to cadmium ion; LOCATED IN: cellular_component unknown; EXPRESSED IN: male gametophyte, flower, cultured cell, pollen tube; EXPRESSED DURING: L mature pollen stage, M germinated pollen stage, 4 anthesis; BEST Arabidopsis thaliana protein match is: myosin heavy chain-related (TAIR:AT5G41780.1); Has 120676 B…	protein_coding			4.2711	3.33382	up in both, ccr2 and rccr2#155 (<2FC)
AT1G77240	AT1G77240.1	AMP-dependent synthetase and ligase family protein; FUNCTIONS IN: catalytic activity; INVOLVED IN: metabolic process; CONTAINS InterPro DOMAIN/s: AMP-binding, conserved site (InterPro:IPR020845), AMP-dependent synthetase/ligase (InterPro:IPR000873); BEST Arabidopsis thaliana protein match is: AMP-dependent synthetase and ligase family protein (TAIR:AT1G21540.1); Has 78814 Blast hits to 72062 prot…	protein_coding			4.8317	5.8113	up in both, ccr2 and rccr2#155 (<2FC)
AT1G78460	AT1G78460.1	SOUL heme-binding family protein; FUNCTIONS IN: binding; INVOLVED IN: biological_process unknown; LOCATED IN: endomembrane system; EXPRESSED IN: 21 plant structures; EXPRESSED DURING: 13 growth stages; CONTAINS InterPro DOMAIN/s: SOUL haem-binding protein (InterPro:IPR006917); BEST Arabidopsis thaliana protein match is: SOUL heme-binding family protein (TAIR:AT1G17100.1); Has 1017 Blast hits to 9…	protein_coding			3.26383	5.15241	up in both, ccr2 and rccr2#155 (<2FC)
AT2G23040	AT2G23040.1	unknown protein; Has 8 Blast hits to 8 proteins in 3 species: Archae - 0; Bacteria - 0; Metazoa - 0; Fungi - 0; Plants - 8; Viruses - 0; Other Eukaryotes - 0 (source: NCBI BLink).	protein_coding			4.59021	5.16173	up in both, ccr2 and rccr2#155 (<2FC)
AT2G28780	AT2G28780.1	unknown protein; INVOLVED IN: biological_process unknown; LOCATED IN: mitochondrion; EXPRESSED IN: inflorescence meristem, root, flower; EXPRESSED DURING: petal differentiation and expansion stage; CONTAINS InterPro DOMAIN/s: Protein of unknown function DUF939, bacterial (InterPro:IPR010343); BEST Arabidopsis thaliana protein match is: unknown protein (TAIR:AT3G09450.1); Has 671 Blast hits to 667…	protein_coding			4.572	4.60335	up in both, ccr2 and rccr2#155 (<2FC)
AT2G29740	AT2G29740.1	UDP-glucosyl transferase 71C2 (UGT71C2); FUNCTIONS IN: quercetin 3-O-glucosyltransferase activity, quercetin 3'-O-glucosyltransferase activity, UDP-glycosyltransferase activity, quercetin 7-O-glucosyltransferase activity, transferase activity, transferring glycosyl groups; INVOLVED IN: metabolic process; LOCATED IN: cellular_component unknown; EXPRESSED IN: hypocotyl, root; CONTAINS InterPro DOMA…	protein_coding	UDP-GLUCOSYL TRANSFERASE 71C2 (UGT71C2)	UDP-GLUCOSYL TRANSFERASE 71C2 (UGT71C2)	2.8813	3.79995	up in both, ccr2 and rccr2#155 (<2FC)
AT2G46750	AT2G46750.1	Encodes a homolog of rat L-gulono-1,4-lactone (L-GulL) oxidase that is involved in the biosynthesis of L-ascorbic acid.	protein_coding	L -GULONO-1,4-LACTONE ( L -GULL) OXIDASE 2 (GULLO2)	L -GULONO-1,4-LACTONE ( L -GULL) OXIDASE 2 (GULLO2); (ATGULLO2)	4.90802	3.26815	up in both, ccr2 and rccr2#155 (<2FC)
AT3G03640	AT3G03640.1	Encodes beta-glucosidase (GLUC).	protein_coding	BETA GLUCOSIDASE 25 (BGLU25)	(GLUC);BETA GLUCOSIDASE 25 (BGLU25)	2.21046	2.03777	up in both, ccr2 and rccr2#155 (<2FC)
AT3G62150	AT3G62150.1	P-glycoprotein 21 (PGP21); FUNCTIONS IN: ATPase activity, coupled to transmembrane movement of substances; INVOLVED IN: transport, transmembrane transport; LOCATED IN: plasma membrane; EXPRESSED IN: 14 plant structures; EXPRESSED DURING: 8 growth stages; CONTAINS InterPro DOMAIN/s: ATPase, AAA+ type, core (InterPro:IPR003593), ABC transporter-like (InterPro:IPR003439), ABC transporter, transmembr…	protein_coding	ATP-BINDING CASSETTE B21 (ABCB21)	ATP-BINDING CASSETTE B21 (ABCB21);P-GLYCOPROTEIN 21 (PGP21)	2.70169	4.27807	up in both, ccr2 and rccr2#155 (<2FC)
AT2G18193	AT2G18193.1	P-loop containing nucleoside triphosphate hydrolases superfamily protein; FUNCTIONS IN: nucleoside-triphosphatase activity, ATPase activity, nucleotide binding, ATP binding; LOCATED IN: endomembrane system; EXPRESSED IN: callus; CONTAINS InterPro DOMAIN/s: ATPase, AAA-type, core (InterPro:IPR003959), ATPase, AAA+ type, core (InterPro:IPR003593), ATPase, AAA-type, conserved site (InterPro:IPR00396…	protein_coding			8.14621	#N/A	up only in ccr2
AT5G48720	AT5G48720.2	Encodes XRI1 (X-ray induced 1). Required for post-meiotic stages of pollen development and male and female meiosis. Maybe required for meiotic DNA repair. Inducible by X-ray. Homozygous xri1 mutants are sterile due to extensive chromosome fragmentation.	protein_coding	X-RAY INDUCED TRANSCRIPT 1 (XRI1)	X-RAY INDUCED TRANSCRIPT 1 (XRI1);X-RAY INDUCED TRANSCRIPT (XRI)	5.0713	#N/A	up only in ccr2
AT4G02390	AT4G02390.1	Encodes a DNA dependent nuclear poly (ADP-ribose) polymerase (E.C.2.4.2.30), thought to be involved in post-translational modification .	protein_coding	POLY(ADP-RIBOSE) POLYMERASE (PP)	POLY(ADP-RIBOSE) POLYMERASE 1 (PARP1); (ATPARP1);POLY(ADP-RIBOSE) POLYMERASE (PP);POLY(ADP-RIBOSE) POLYMERASE (APP)	8.55087	#N/A	up only in ccr2
AT3G27060	AT3G27060.1	Encodes one of the 3 ribonucleotide reductase (RNR) small subunit genes. TSO2 transcription occurs predominantly at the S-phase of the cell cycle and its expression pattern is consistent with its role in dNDP biosynthesis during DNA replication in actively dividing cells. Critical for cell cycle progression, DNA damage repair and plant development.	protein_coding	TSO MEANING 'UGLY' IN CHINESE 2 (TSO2)	TSO MEANING 'UGLY' IN CHINESE 2 (TSO2); (ATTSO2)	3.29204	#N/A	up only in ccr2
AT3G07800	AT3G07800.1	Thymidine kinase; FUNCTIONS IN: thymidine kinase activity, ATP binding; INVOLVED IN: pyrimidine deoxyribonucleoside interconversion, anaerobic respiration; LOCATED IN: cellular_component unknown; EXPRESSED IN: 23 plant structures; EXPRESSED DURING: 13 growth stages; CONTAINS InterPro DOMAIN/s: Thymidine kinase (InterPro:IPR001267), Thymidine kinase, conserved site (InterPro:IPR020633); BEST Arabi…	protein_coding			2.97233	#N/A	up only in ccr2
AT3G27630	AT3G27630.1	unknown protein; BEST Arabidopsis thaliana protein match is: unknown protein (TAIR:AT5G40460.1); Has 36 Blast hits to 36 proteins in 6 species: Archae - 0; Bacteria - 0; Metazoa - 0; Fungi - 0; Plants - 36; Viruses - 0; Other Eukaryotes - 0 (source: NCBI BLink).	protein_coding			8.94224	#N/A	up only in ccr2
AT3G58270	AT3G58270.1	Arabidopsis phospholipase-like protein (PEARLI 4) with TRAF-like domain; CONTAINS InterPro DOMAIN/s: TRAF-like (InterPro:IPR008974), MATH (InterPro:IPR002083), Phospholipase-like, arabidopsis (InterPro:IPR007942); BEST Arabidopsis thaliana protein match is: RESTRICTED TEV MOVEMENT 3 (TAIR:AT3G58350.1); Has 1579 Blast hits to 1429 proteins in 196 species: Archae - 9; Bacteria - 32; Metazoa - 401; …	protein_coding			7.43863	#N/A	up only in ccr2
AT5G64060	AT5G64060.1	NAC domain containing protein 103 (NAC103); FUNCTIONS IN: sequence-specific DNA binding transcription factor activity; INVOLVED IN: multicellular organismal development, regulation of transcription; LOCATED IN: cellular_component unknown; EXPRESSED IN: 9 plant structures; EXPRESSED DURING: 6 growth stages; CONTAINS InterPro DOMAIN/s: No apical meristem (NAM) protein (InterPro:IPR003441); BEST Ara…	protein_coding	NAC DOMAIN CONTAINING PROTEIN 103 (NAC103)	NAC DOMAIN CONTAINING PROTEIN 103 (NAC103);NAC DOMAIN CONTAINING PROTEIN 103 (anac103)	18.7195	#N/A	up only in ccr2
AT1G31280	AT1G31280.1	Encodes Argonaute gene that binds viral siRNAs and is involved in antiviral defense response. Regulates innate immunity.	protein_coding	ARGONAUTE 2 (AGO2)	ARGONAUTE 2 (AGO2)	2.16695	#N/A	up only in ccr2
AT5G43500	AT5G43500.1	encodes a protein whose sequence is similar to actin-related proteins (ARPs) in other organisms. Member of nuclear ARP family of genes.	protein_coding	ACTIN-RELATED PROTEIN 9 (ARP9)	ACTIN-RELATED PROTEIN 9 (ARP9);ACTIN-RELATED PROTEIN 9 (ATARP9)	2.44961	#N/A	up only in ccr2
AT3G53200	AT3G53200.1	Member of the R2R3 factor gene family.	protein_coding	MYB DOMAIN PROTEIN 27 (MYB27)	MYB DOMAIN PROTEIN 27 (AtMYB27);MYB DOMAIN PROTEIN 27 (MYB27)	3.03737	#N/A	up only in ccr2
AT5G13210	AT5G13210.1	Uncharacterised conserved protein UCP015417, vWA; CONTAINS InterPro DOMAIN/s: Uncharacterised conserved protein UCP015417, vWA (InterPro:IPR011205), von Willebrand factor, type A (InterPro:IPR002035); BEST Arabidopsis thaliana protein match is: Uncharacterised conserved protein UCP015417, vWA (TAIR:AT3G24780.1); Has 1807 Blast hits to 1807 proteins in 277 species: Archae - 0; Bacteria - 0; Metazo…	protein_coding			3.8323	#N/A	up only in ccr2
AT1G30475	AT1G30475.1	BEST Arabidopsis thaliana protein match is: embryo defective 1303 (TAIR:AT1G56200.1); Has 148 Blast hits to 148 proteins in 34 species: Archae - 0; Bacteria - 14; Metazoa - 63; Fungi - 0; Plants - 62; Viruses - 0; Other Eukaryotes - 9 (source: NCBI BLink).	protein_coding			4.03293	#N/A	up only in ccr2
AT5G03780	AT5G03780.1	Encodes a protein whose sequence is similar to human telomere proteins. This belongs to TRFL family 2, which do not show DNA binding in vitro.	protein_coding	TRF-LIKE 10 (TRFL10)	TRF-LIKE 10 (TRFL10)	3.82816	#N/A	up only in ccr2
AT1G75670	AT1G75670.1	DNA-directed RNA polymerases; FUNCTIONS IN: DNA-directed RNA polymerase activity; INVOLVED IN: transcription; LOCATED IN: cellular_component unknown; EXPRESSED IN: 22 plant structures; EXPRESSED DURING: 13 growth stages; CONTAINS InterPro DOMAIN/s: RNA polymerase Rpb7, N-terminal (InterPro:IPR005576); Has 67 Blast hits to 67 proteins in 26 species: Archae - 0; Bacteria - 0; Metazoa - 0; Fungi - 6…	protein_coding			2.66577	#N/A	up only in ccr2
AT4G22960	AT4G22960.1	Protein of unknown function (DUF544) ; CONTAINS InterPro DOMAIN/s: Protein of unknown function DUF544 (InterPro:IPR007518); BEST Arabidopsis thaliana protein match is: Protein of unknown function (DUF544) (TAIR:AT4G11860.1); Has 737 Blast hits to 425 proteins in 174 species: Archae - 0; Bacteria - 23; Metazoa - 282; Fungi - 261; Plants - 75; Viruses - 0; Other Eukaryotes - 96 (source: NCBI BLink).	protein_coding			17.0274	#N/A	up only in ccr2
AT1G23550	AT1G23550.1	Encodes a protein with similarity to RCD1 but without the WWE domain. The protein does have a PARP signature upstream of the C-terminal protein interaction domain. The PARP signature may bind NAD+ and attach the ADP-ribose-moiety from NAD+ to the target molecule. Its presence suggests a role for the protein in ADP ribosylation.	protein_coding	SIMILAR TO RCD ONE 2 (SRO2)	SIMILAR TO RCD ONE 2 (SRO2)	3.46249	#N/A	up only in ccr2
AT4G23570	AT4G23570.3	Closely related to SGT1B, may function in SCF(TIR1) mediated protein degradation. AtSGT1a and AtSGT1b are functionally redundant in the resistance to pathogenes. AtSGT1b was more highly expressed than AtSGT1. The N-terminal TPR domain of AtSGT1a reduces the steady-state level of Arabidopsis SGT1 proteins whereas the same domain from AtSGT1b enhances SGT1 accumulation. The TPR domain is dispensabl…	protein_coding	(SGT1A)	(SGT1A)	2.28424	#N/A	up only in ccr2
AT5G48030	AT5G48030.1	encodes a mitochondrially targeted DNAJ protein involved in female gametophyte development.	protein_coding	GAMETOPHYTIC FACTOR 2 (GFA2)	GAMETOPHYTIC FACTOR 2 (GFA2)	2.26779	#N/A	up only in ccr2
AT1G70440	AT1G70440.1	Encodes a protein with similarity to RCD1 but without the WWE domain. The protein does have a PARP signature upstream of the C-terminal protein interaction domain. The PARP signature may bind NAD+ and attach the ADP-ribose-moiety from NAD+ to the target molecule. Its presence suggests a role for the protein in ADP ribosylation.	protein_coding	SIMILAR TO RCD ONE 3 (SRO3)	SIMILAR TO RCD ONE 3 (SRO3)	4.84038	#N/A	up only in ccr2
AT4G28510	AT4G28510.1	prohibitin 1 (Atphb1)	protein_coding	PROHIBITIN 1 (PHB1)	PROHIBITIN 1 (ATPHB1);PROHIBITIN 1 (PHB1)	2.28105	#N/A	up only in ccr2
AT3G19390	AT3G19390.1	Granulin repeat cysteine protease family protein; FUNCTIONS IN: cysteine-type endopeptidase activity, cysteine-type peptidase activity; INVOLVED IN: proteolysis; LOCATED IN: endomembrane system; EXPRESSED IN: 9 plant structures; EXPRESSED DURING: 4 anthesis, petal differentiation and expansion stage; CONTAINS InterPro DOMAIN/s: Peptidase C1A, papain (InterPro:IPR013128), Proteinase inhibitor I29,…	protein_coding			4.3809	#N/A	up only in ccr2
AT5G40840	AT5G40840.2	Cohesion family protein SYN2 (SYN2).	protein_coding	(SYN2)	(SYN2)	2.84183	#N/A	up only in ccr2
AT4G21070	AT4G21070.1	Encodes AtBRCA1, an ortholog of the human breast cancer susceptibility gene 1. Contains one N-terminal RING finger, two C-terminal BRCT and the p300/CBP interacting domain. Strongly induced by gamma rays, consistent with a putative role in DNA repair and in cell cycle control.	protein_coding	BREAST CANCER SUSCEPTIBILITY1 (BRCA1)	BREAST CANCER SUSCEPTIBILITY1 (BRCA1);ARABIDOPSIS THALIANA BREAST CANCER SUSCEPTIBILITY1 (ATBRCA1)	3.57812	#N/A	up only in ccr2
AT4G20090	AT4G20090.1	embryo defective 1025 (EMB1025); CONTAINS InterPro DOMAIN/s: Pentatricopeptide repeat (InterPro:IPR002885); BEST Arabidopsis thaliana protein match is: Pentatricopeptide repeat (PPR) superfamily protein (TAIR:AT5G64320.1); Has 50788 Blast hits to 13881 proteins in 299 species: Archae - 2; Bacteria - 48; Metazoa - 729; Fungi - 797; Plants - 47488; Viruses - 0; Other Eukaryotes - 1724 (source: NCBI…	protein_coding	EMBRYO DEFECTIVE 1025 (EMB1025)	EMBRYO DEFECTIVE 1025 (EMB1025)	2.19522	#N/A	up only in ccr2
AT5G66052	AT5G66052.1	unknown protein; Has 30201 Blast hits to 17322 proteins in 780 species: Archae - 12; Bacteria - 1396; Metazoa - 17338; Fungi - 3422; Plants - 5037; Viruses - 0; Other Eukaryotes - 2996 (source: NCBI BLink).	protein_coding			2.80623	#N/A	up only in ccr2
AT4G28950	AT4G28950.1	A member of ROP GTPase gene family.	protein_coding	RHO-RELATED PROTEIN FROM PLANTS 9 (ROP9)	RHO-RELATED PROTEIN FROM PLANTS 9 (ROP9); (RAC7);ARABIDOPSIS RAC-LIKE 7 (ARAC7); (ATROP9); (ATRAC7)	9.83291	#N/A	up only in ccr2
AT4G39740	AT4G39740.1	Encodes HCC2, one of the two Arabidopsis genes (HCC1 and HCC2) resulting from a duplication with homology to the SCO proteins involved in copper insertion during cytochrome c oxidase (COX) assembly in other organisms. HCC2, which lacks the cysteines and histidine putatively involved in copper binding, functions in copper sensing and redox homeostasis.	protein_coding	HOMOLOGUE OF COPPER CHAPERONE SCO1 2 (HCC2)	HOMOLOGUE OF COPPER CHAPERONE SCO1 2 (HCC2)	3.78839	#N/A	up only in ccr2
AT1G29860	AT1G29860.1	member of WRKY Transcription Factor; Group II-c	protein_coding	WRKY DNA-BINDING PROTEIN 71 (WRKY71)	WRKY DNA-BINDING PROTEIN 71 (ATWRKY71);WRKY DNA-BINDING PROTEIN 71 (WRKY71)	5.58753	#N/A	up only in ccr2
AT3G45730	AT3G45730.1	unknown protein; Has 3 Blast hits to 3 proteins in 1 species: Archae - 0; Bacteria - 0; Metazoa - 0; Fungi - 0; Plants - 3; Viruses - 0; Other Eukaryotes - 0 (source: NCBI BLink).	protein_coding			2.84158	#N/A	up only in ccr2
AT1G53990	AT1G53990.1	Contains lipase signature motif and GDSL domain.	protein_coding	GDSL-MOTIF LIPASE 3 (GLIP3)	GDSL-MOTIF LIPASE 3 (GLIP3)	7.1113	#N/A	up only in ccr2
AT1G29030	AT1G29030.1	Apoptosis inhibitory protein 5 (API5); FUNCTIONS IN: binding; INVOLVED IN: biological_process unknown; LOCATED IN: cellular_component unknown; CONTAINS InterPro DOMAIN/s: Apoptosis inhibitory 5 (InterPro:IPR008383), Armadillo-type fold (InterPro:IPR016024); BEST Arabidopsis thaliana protein match is: Apoptosis inhibitory protein 5 (API5) (TAIR:AT2G34040.1); Has 834 Blast hits to 647 proteins in 1…	protein_coding			2.84434	#N/A	up only in ccr2
AT3G52115	AT3G52115.1	Induced in response to ionizing radiation, shows basal expression in mitotically active cells and high expression in endoreduplicating cells. May be involved in DNA damage-induced growth arrest. Protein sequence contains a PEST destruction box.	protein_coding	GAMMA RESPONSE GENE 1 (GR1)	GAMMA RESPONSE GENE 1 (GR1); (COM1); (AtCOM1);GAMMA RESPONSE GENE 1 (ATGR1)	4.41737	#N/A	up only in ccr2
[truncated: 363 more rows]
