# Supplementary material for: A cis-carotene derived apocarotenoid regulates etioplast and chloroplast development
Source: eLife. 2020 Jan 31;9:e45310. doi: 10.7554/eLife.45310 (PMC6994220; doi:10.7554/eLife.45310)
Supplement: Supplementary file 4. [file elife-45310-supp4.xlsx]

## Sheet: Description
Supplementary file 4: Transcriptome analysis of WT, ccr2 and ccr2 ziso-155 immature leaf tissues
1	ccr2 vs wt
2	rccr2#155 vs wt
3	ccr2 vs rccr2#155
								agriGO Anaylsis Criteria:
Colour Notation								Select species				Arabidopsis thaliana TAIR10
up-regulated								Select reference				Arabidopsis genome locus (TAIR10)
contra-regulated								Statistical Method				Fisher
down-regulated								Multi-test adjustment method				Hochberg (FDR)
								Significance Level				0.05
DE Column Descriptions								Minimum number of mapping entries				5
genes	Arabidopsis AGI gene accession number							Gene ontology type				Complete GO
Locus.Identifier	Annotated AGI splice variant							P				Biological Process
Gene.Model.Name	Description of gene							F				Biological Function
Gene.Model.Description	Describes if it is protein coding							C				Biological Component
Gene.Model.Type	Gene symbol and name
Primary.Gene.Symbol	Gene symbol and name
logFC	Log2 fold change in gene expression
AveExpr	an average expression level of a gene across all simples sequenced. A gene is basically a low expressed gene if the number is low.
T	moderated t-statistic, which is computed for each probe and for each contrast. This has the same interpretation as an ordinary t-statistic except that the standard errors have been moderated across genes
P.Value	Moderated t-statistics lead to p-values in the same way that ordinary t-statistics do except that the degrees of freedom are increased, reflecting the greater reliability associated with the smoothed standard errors
adj.P.Val	FDR correction
B	P value alternative. The B-statistic (lods or B) is the log-odds that the gene is differentially expressed.
Plastid	Plastid localised genes (P; acronym for positive hits)					See Van Aken, 2012 Frontiers in Plant Science, Vol 3; 281
Plast-Rg	Genes regulated by plastid perturbations					See Van Aken, 2012 Frontiers in Plant Science, Vol 3; 281
M	Mitochondria localised genes (M; acronym for positive hits)					See Van Aken, 2012 Frontiers in Plant Science, Vol 3; 281
Mito-Rg	Genes regulated by mitochondrial perturbations					See Van Aken, 2012 Frontiers in Plant Science, Vol 3; 281
TF	Transcription Factor (TF; acronym for positive hits)					See Van Aken, 2012 Frontiers in Plant Science, Vol 3; 281
Ox	Peroxisome localised genes (Ox; acronym for positive hits)					See Van Aken, 2012 Frontiers in Plant Science, Vol 3; 281
Excel Sheet Acronyms
GV	Genevestigator
GO	Gene Ontology
Org-Retro	Organelle and Retrograde Gene Lists [Van Aken, 2012 Frontiers in Plant Science, Vol 3; 281]
reg	regulated
dereg	deregulated
DE	Differentially Expressed
JL	Juvenile Leaves
ES	Etiolated Seedlings

## Sheet: DE Summary
	Differential gene expression summary (Rosette Leaves)
	Genotype	No.	Up	Down	Total	Unchanged
	ccr2	1	433	784	1217	19780
	rccr2#155	2	2746	2804	5550	15447
	Experiment		Differental Expression		Percentage Organelle Localization and Perturbation
	Genotype	No.	Change	Number	Plast	Plast-Rg	Mito	Mito-Rg	TF	Perox
	ccr2	1	Up	433	6.23557	10.8545	4.38799	10.6236	18.0139	1.38568
			Down	784	8.29082	7.01531	1.65816	6.88776	7.14286	0.510204
			Total	1217	7.55957	8.38127	2.62942	8.21693	11.0107	0.821693
	rccr2#155	2	Up	2746	7.39257	7.64749	2.185	6.91916	8.59432	0.946832
			Down	2804	12.8031	1.99715	3.56633	5.63481	8.13124	0.499287
			Total	5550	10.1261	4.79279	2.88288	6.27027	8.36036	0.720721

## Sheet: 1-JL-ccr2
gene	Locus.Identifier	Gene.Model.Name	Gene.Model.Description	Gene.Model.Type	Primary.Gene.Symbol	logFC	AveExpr	t	P.Value	adj.P.Val	B
AT1G09530	AT1G09530.1	Transcription factor interacting with photoreceptors phyA and phyB. Forms a ternary complex in vitro with G-box element of the promoters of LHY, CCA1. Acts as a negative regulator of phyB signalling. It degrades rapidly after irradiation of dark grown seedlings in a process controlled by phytochromes. Does not play a significant role in controlling light input and function of the circadian clockw…	protein_coding	PHYTOCHROME INTERACTING FACTOR 3 (PIF3)	PHYTOCHROME INTERACTING FACTOR 3 (PIF3);PHOTOCURRENT 1 (POC1);PHYTOCHROME-ASSOCIATED PROTEIN 3 (PAP3);PURPLE ACID PHOSPHATASE 3 (PAP3)	7.78162	2.36696	6.47876	1.13e-07	1.58e-05	7.6238
AT4G25580	AT4G25580.1	CAP160 protein; CONTAINS InterPro DOMAIN/s: CAP160 (InterPro:IPR012418); BEST Arabidopsis thaliana protein match is: CAP160 protein (TAIR:AT5G52300.1); Has 292 Blast hits to 249 proteins in 85 species: Archae - 0; Bacteria - 26; Metazoa - 66; Fungi - 33; Plants - 116; Viruses - 9; Other Eukaryotes - 42 (source: NCBI BLink).	protein_coding			6.59109	2.2963	7.18109	1.22e-08	3.23e-06	8.97472
AT4G26260	AT4G26260.2	Encodes a myo-inositol oxygenase.	protein_coding	MYO-INOSITOL OXYGENASE 4 (MIOX4)	MYO-INOSITOL OXYGENASE 4 (MIOX4)	6.43434	0.922767	9.04299	4.11e-11	6.63e-08	14.9142
AT3G59930	AT3G59930.1	Encodes a defensin-like (DEFL) family protein.	protein_coding			5.98062	1.26968	5.10032	9.14e-06	0.000394957	3.25172
AT5G23700	AT5G23700.1	unknown protein; BEST Arabidopsis thaliana protein match is: unknown protein (TAIR:AT3G48860.2); Has 30201 Blast hits to 17322 proteins in 780 species: Archae - 12; Bacteria - 1396; Metazoa - 17338; Fungi - 3422; Plants - 5037; Viruses - 0; Other Eukaryotes - 2996 (source: NCBI BLink).	protein_coding			5.13983	0.314157	5.13683	8.14e-06	0.000369327	3.31542
AT1G15380	AT1G15380.1	Lactoylglutathione lyase / glyoxalase I family protein; CONTAINS InterPro DOMAIN/s: Glyoxalase/bleomycin resistance protein/dioxygenase (InterPro:IPR004360); BEST Arabidopsis thaliana protein match is: Lactoylglutathione lyase / glyoxalase I family protein (TAIR:AT1G80160.1); Has 780 Blast hits to 780 proteins in 276 species: Archae - 1; Bacteria - 484; Metazoa - 4; Fungi - 2; Plants - 222; Virus…	protein_coding	GLYOXYLASE I 4 (GLYI4)	GLYOXYLASE I 4 (GLYI4)	4.94945	4.39659	6.64103	6.72e-08	1.07e-05	7.96346
AT4G34410	AT4G34410.1	encodes a member of the ERF (ethylene response factor) subfamily B-3 of ERF/AP2 transcription factor family. The protein contains one AP2 domain. There are 18 members in this subfamily including ATERF-1, ATERF-2, AND ATERF-5.	protein_coding	REDOX RESPONSIVE TRANSCRIPTION FACTOR 1 (RRTF1)	REDOX RESPONSIVE TRANSCRIPTION FACTOR 1 (RRTF1)	4.93251	0.501327	5.34037	4.27e-06	0.000230191	4.13123
AT3G25190	AT3G25190.1	The gene encodes nodulin-like21 whose transcript abundance was repressed under conditions of Fe-deficient growth.	protein_coding			4.86356	0.490705	7.99594	9.65e-10	5.08e-07	10.4148
AT1G12610	AT1G12610.1	Encodes a member of the DREB subfamily A-1 of ERF/AP2 transcription factor family (DDF1). The protein contains one AP2 domain. There are six members in this subfamily, including CBF1, CBF2, and CBF3. Overexpression of this gene results in delayed flowering and dwarfism, reduction of gibberellic acid biosynthesis, and increased tolerance to high levels of salt. This gene is expressed in all tissue…	protein_coding	DWARF AND DELAYED FLOWERING 1 (DDF1)	DWARF AND DELAYED FLOWERING 1 (DDF1)	4.77657	-0.622866	4.42443	7.56e-05	0.00182624	1.51379
AT3G56790	AT3G56790.1	RNA splicing factor-related; CONTAINS InterPro DOMAIN/s: Pre-mRNA-splicing factor 3 (InterPro:IPR013881); BEST Arabidopsis thaliana protein match is: Pre-mRNA-splicing factor 3 (TAIR:AT3G55930.1); Has 356 Blast hits to 326 proteins in 158 species: Archae - 0; Bacteria - 0; Metazoa - 124; Fungi - 116; Plants - 74; Viruses - 0; Other Eukaryotes - 42 (source: NCBI BLink).	protein_coding			4.63642	-1.07638	5.36331	3.97e-06	0.000216965	3.65759
AT2G46740	AT2G46740.1	Encodes a homolog of rat L-gulono-1,4-lactone (L-GulL) oxidase that is involved in the biosynthesis of L-ascorbic acid.	protein_coding	L -GULONO-1,4-LACTONE ( L -GULL) OXIDASE 5 (GULLO5)	L -GULONO-1,4-LACTONE ( L -GULL) OXIDASE 5 (GULLO5); (ATGULLO5)	4.58013	1.25419	3.79864	0.000497939	0.00679794	-0.196562
AT3G49620	AT3G49620.1	encodes a protein similar to 2-oxoacid-dependent dioxygenase. Expression is induced after 24 hours of dark treatment, in senescing leaves and treatment with exogenous photosynthesis inhibitor. Induction of gene expression was suppressed in excised leaves supplied with sugar. The authors suggest that the gene's expression pattern is responding to the level of sugar in the cell.	protein_coding	DARK INDUCIBLE 11 (DIN11)	DARK INDUCIBLE 11 (DIN11)	4.53823	-0.132838	3.70882	0.00064753	0.00828531	-0.371873
AT1G15040	AT1G15040.1	Encodes a nitrogen regulated putative glutamine amidotransferase that represses shoot branching.	protein_coding	GLUTAMINE AMIDOTRANSFERASE 1_2.1 (GAT1_2.1)	GLUTAMINE AMIDOTRANSFERASE (GAT);GLUTAMINE AMIDOTRANSFERASE 1_2.1 (GAT1_2.1)	4.43942	3.41351	3.71325	0.00063923	0.00821414	-0.367645
AT5G51990	AT5G51990.1	encodes a member of the DREB subfamily A-1 of ERF/AP2 transcription factor family (CBF4). The protein contains one AP2 domain. There are six members in this subfamily, including CBF1, CBF2, and CBF3. This gene is involved in response to drought stress and abscisic acid treatment, but not to low temperature.	protein_coding	C-REPEAT-BINDING FACTOR 4 (CBF4)	DEHYDRATION-RESPONSIVE ELEMENT-BINDING PROTEIN 1D (DREB1D);C-REPEAT-BINDING FACTOR 4 (CBF4)	4.21768	-1.5753	5.58695	1.95e-06	0.000125684	4.40266
AT3G02840	AT3G02840.1	ARM repeat superfamily protein; FUNCTIONS IN: binding; INVOLVED IN: response to other organism, response to ozone; EXPRESSED IN: 16 plant structures; EXPRESSED DURING: 8 growth stages; CONTAINS InterPro DOMAIN/s: Armadillo-like helical (InterPro:IPR011989), Armadillo-type fold (InterPro:IPR016024); BEST Arabidopsis thaliana protein match is: ARM repeat superfamily protein (TAIR:AT5G37490.1); Has …	protein_coding			4.21585	0.574624	4.65397	3.71e-05	0.00110928	2.15781
AT5G45630	AT5G45630.1	CONTAINS InterPro DOMAIN/s: Protein of unknown function DUF584 (InterPro:IPR007608); BEST Arabidopsis thaliana protein match is: AtS40-3 (TAIR:AT4G18980.1); Has 158 Blast hits to 158 proteins in 19 species: Archae - 0; Bacteria - 0; Metazoa - 0; Fungi - 0; Plants - 158; Viruses - 0; Other Eukaryotes - 0 (source: NCBI BLink).	protein_coding			4.19742	0.0975323	6.67041	6.12e-08	1e-05	7.89118
AT1G19530	AT1G19530.1	unknown protein; FUNCTIONS IN: molecular_function unknown; INVOLVED IN: N-terminal protein myristoylation, anaerobic respiration; LOCATED IN: cellular_component unknown; EXPRESSED IN: leaf apex, inflorescence meristem, hypocotyl, root, flower; EXPRESSED DURING: petal differentiation and expansion stage; Has 47 Blast hits to 47 proteins in 13 species: Archae - 0; Bacteria - 0; Metazoa - 0; Fungi -…	protein_coding			4.13315	3.89699	3.40297	0.00155494	0.0154005	-1.13975
AT5G39150	AT5G39150.1	RmlC-like cupins superfamily protein; FUNCTIONS IN: manganese ion binding, nutrient reservoir activity; INVOLVED IN: biological_process unknown; LOCATED IN: endomembrane system, apoplast; CONTAINS InterPro DOMAIN/s: Cupin, RmlC-type (InterPro:IPR011051), Cupin 1 (InterPro:IPR006045), RmlC-like jelly roll fold (InterPro:IPR014710), Germin (InterPro:IPR001929), Germin, manganese binding site (Inter…	protein_coding			4.05383	-0.579959	4.31079	0.000107112	0.00229492	1.00921
AT3G49130	AT3G49130.1	SWAP (Suppressor-of-White-APricot)/surp RNA-binding domain-containing protein; FUNCTIONS IN: RNA binding; INVOLVED IN: RNA processing; LOCATED IN: cellular_component unknown; EXPRESSED IN: stamen; EXPRESSED DURING: 4 anthesis; CONTAINS InterPro DOMAIN/s: SWAP/Surp (InterPro:IPR000061); BEST Arabidopsis thaliana protein match is: SWAP (Suppressor-of-White-APricot)/surp domain-containing protein (T…	protein_coding			4.05265	-2.67222	5.49145	2.64e-06	0.00015827	3.90947
AT1G35140	AT1G35140.1	EXL1 is involved in the C-starvation response. Phenotypic changes of an exl1 loss of function mutant became evident only under corresponding experimental conditions. For example, the mutant showed diminished biomass production in a short-day/low light growth regime, impaired survival during extended night, and impaired survival of anoxia stress.	protein_coding	PHOSPHATE-INDUCED 1 (PHI-1)	EXORDIUM LIKE 7 (EXL7);EXORDIUM LIKE 1 (EXL1);PHOSPHATE-INDUCED 1 (PHI-1)	3.94711	3.16171	5.13208	8.27e-06	0.000372508	3.54907
AT3G48520	AT3G48520.1	CYP94B3 is a jasmonoyl-isoleucine-12-hydroxylase that catalyzes the formation of 12-OH-JA-Ile from JA-Ile. By reducing the levels of this the biologically active phytohormone, CYP94B3 attenuates the jasmonic acid signaling cascade. CYP94B3 transcript levels rise in response to wounding.	protein_coding	CYTOCHROME P450, FAMILY 94, SUBFAMILY B, POLYPEPTIDE 3 (CYP94B3)	CYTOCHROME P450, FAMILY 94, SUBFAMILY B, POLYPEPTIDE 3 (CYP94B3)	3.93561	2.03892	3.3297	0.00190917	0.017864	-1.30827
AT5G21960	AT5G21960.1	encodes a member of the DREB subfamily A-5 of ERF/AP2 transcription factor family. The protein contains one AP2 domain. There are 15 members in this subfamily including RAP2.1, RAP2.9 and RAP2.10.	protein_coding			3.91644	-1.50319	5.18772	6.93e-06	0.000329266	3.57722
AT1G67980	AT1G67980.1	Encodes S-adenosyl-L-methionine: transcaffeoyl Coenzyme A 3-O-methyltransferase.	protein_coding	CAFFEOYL-COA 3-O-METHYLTRANSFERASE (CCOAMT)	CAFFEOYL-COA 3-O-METHYLTRANSFERASE (CCOAMT)	3.90305	0.744452	3.34728	0.00181778	0.0172315	-1.26474
AT1G08630	AT1G08630.1	Encodes a threonine aldolase, involved in threonine degradation to glycine. Primarily expressed in seeds and seedlings.	protein_coding	THREONINE ALDOLASE 1 (THA1)	THREONINE ALDOLASE 1 (THA1)	3.85126	4.48902	4.99322	1.28e-05	0.000508934	3.1451
AT4G25490	AT4G25490.1	Transcriptional activator that binds to the DRE/CRT regulatory element and induces COR (cold-regulated) gene expression increasing plant freezing tolerance. It encodes a member of the DREB subfamily A-1 of ERF/AP2 transcription factor family (CBF1). The protein contains one AP2 domain. There are six members in this subfamily, including CBF1, CBF2, and CBF3. This gene is involved in response to lo…	protein_coding	C-REPEAT/DRE BINDING FACTOR 1 (CBF1)	(ATCBF1);DRE BINDING PROTEIN 1B (DREB1B);C-REPEAT/DRE BINDING FACTOR 1 (CBF1)	3.81928	0.883451	5.17289	7.26e-06	0.000342019	3.68504
AT4G29780	AT4G29780.1	unknown protein; BEST Arabidopsis thaliana protein match is: unknown protein (TAIR:AT5G12010.1); Has 945 Blast hits to 944 proteins in 87 species: Archae - 0; Bacteria - 0; Metazoa - 519; Fungi - 43; Plants - 365; Viruses - 0; Other Eukaryotes - 18 (source: NCBI BLink).	protein_coding			3.80278	4.87413	6.73116	5.05e-08	8.9e-06	8.38525
AT1G62500	AT1G62500.1	Bifunctional inhibitor/lipid-transfer protein/seed storage 2S albumin superfamily protein; FUNCTIONS IN: lipid binding; INVOLVED IN: lipid transport; LOCATED IN: endomembrane system; EXPRESSED IN: 17 plant structures; EXPRESSED DURING: 8 growth stages; CONTAINS InterPro DOMAIN/s: Bifunctional inhibitor/plant lipid transfer protein/seed storage (InterPro:IPR016140), Plant lipid transfer protein/se…	protein_coding			3.73506	0.363873	3.14952	0.00313612	0.0249523	-1.72981
AT1G19210	AT1G19210.1	encodes a member of the DREB subfamily A-5 of ERF/AP2 transcription factor family. The protein contains one AP2 domain. There are 15 members in this subfamily including RAP2.1, RAP2.9 and RAP2.10.	protein_coding			3.71088	-1.83109	2.86815	0.0066324	0.0428805	-2.33053
AT2G29460	AT2G29460.1	Encodes glutathione transferase belonging to the tau class of GSTs. Naming convention according to Wagner et al. (2002).	protein_coding	GLUTATHIONE S-TRANSFERASE TAU 4 (GSTU4)	GLUTATHIONE S-TRANSFERASE TAU 4 (GSTU4);GLUTATHIONE S-TRANSFERASE TAU 4 (ATGSTU4);GLUTATHIONE S-TRANSFERASE 22 (GST22)	3.65862	1.54373	3.06427	0.0039488	0.0296541	-1.91652
AT2G16586	AT2G16586.1	unknown protein; LOCATED IN: endomembrane system; EXPRESSED IN: sperm cell; Has 35333 Blast hits to 34131 proteins in 2444 species: Archae - 798; Bacteria - 22429; Metazoa - 974; Fungi - 991; Plants - 531; Viruses - 0; Other Eukaryotes - 9610 (source: NCBI BLink).	protein_coding			3.61509	0.818152	3.46984	0.00128725	0.0134804	-0.996639
AT5G52050	AT5G52050.1	MATE efflux family protein; FUNCTIONS IN: antiporter activity, drug transmembrane transporter activity; INVOLVED IN: drug transmembrane transport, transmembrane transport; LOCATED IN: membrane; EXPRESSED IN: 7 plant structures; EXPRESSED DURING: 7 growth stages; CONTAINS InterPro DOMAIN/s: Multi antimicrobial extrusion protein MatE (InterPro:IPR002528); BEST Arabidopsis thaliana protein match is:…	protein_coding			3.60828	1.20969	4.24559	0.000130676	0.00265616	1.02161
AT2G38600	AT2G38600.1	HAD superfamily, subfamily IIIB acid phosphatase ; FUNCTIONS IN: acid phosphatase activity; INVOLVED IN: biological_process unknown; LOCATED IN: endomembrane system; EXPRESSED IN: 15 plant structures; EXPRESSED DURING: 6 growth stages; CONTAINS InterPro DOMAIN/s: Acid phosphatase (Class B) (InterPro:IPR005519), Vegetative storage protein/acid phosphatase (InterPro:IPR014403), Acid phosphatase, pl…	protein_coding			3.59997	-2.16574	6.88229	3.13e-08	6.13e-06	7.23968
AT1G74930	AT1G74930.1	encodes a member of the DREB subfamily A-5 of ERF/AP2 transcription factor family. The protein contains one AP2 domain. There are 15 members in this subfamily including RAP2.1, RAP2.9 and RAP2.10.	protein_coding	(ORA47)	(ORA47)	3.57727	1.1333	7.13917	1.39e-08	3.52e-06	9.5956
AT4G15680	AT4G15680.1	Thioredoxin superfamily protein; FUNCTIONS IN: electron carrier activity, arsenate reductase (glutaredoxin) activity, protein disulfide oxidoreductase activity; INVOLVED IN: cell redox homeostasis; LOCATED IN: endomembrane system; EXPRESSED IN: 14 plant structures; EXPRESSED DURING: 8 growth stages; CONTAINS InterPro DOMAIN/s: Glutaredoxin-like, plant II (InterPro:IPR011905), Thioredoxin fold (In…	protein_coding			3.55329	-1.27853	4.14146	0.000179203	0.00331809	0.757472
AT1G21310	AT1G21310.1	Encodes extensin 3.	protein_coding	EXTENSIN 3 (EXT3)	EXTENSIN 3 (EXT3);ROOT-SHOOT-HYPOCOTYL DEFECTIVE (RSH);EXTENSIN 3 (ATEXT3)	3.46469	4.61712	3.30968	0.00201861	0.018541	-1.3707
AT1G30720	AT1G30720.1	FAD-binding Berberine family protein; FUNCTIONS IN: electron carrier activity, oxidoreductase activity, FAD binding, catalytic activity; LOCATED IN: endomembrane system; CONTAINS InterPro DOMAIN/s: FAD-binding, type 2 (InterPro:IPR016166), Berberine/berberine-like (InterPro:IPR012951), FAD linked oxidase, N-terminal (InterPro:IPR006094); BEST Arabidopsis thaliana protein match is: FAD-binding Ber…	protein_coding			3.45196	2.744	4.34787	9.56e-05	0.00211344	1.3249
AT5G44430	AT5G44430.1	Predicted to encode a PR (pathogenesis-related) protein. Belongs to the plant defensin (PDF) family with the following members: At1g75830/PDF1.1, At5g44420/PDF1.2a, At2g26020/PDF1.2b, At5g44430/PDF1.2c, At2g26010/PDF1.3, At1g19610/PDF1.4, At1g55010/PDF1.5, At2g02120/PDF2.1, At2g02100/PDF2.2, At2g02130/PDF2.3, At1g61070/PDF2.4, At5g63660/PDF2.5, At2g02140/PDF2.6, At5g38330/PDF3.1 and At4g30070/PDF…	protein_coding	PLANT DEFENSIN 1.2C (PDF1.2c)	PLANT DEFENSIN 1.2C (PDF1.2c)	3.42981	-2.56973	2.80403	0.00782897	0.0484197	-2.46381
AT4G16160	AT4G16160.2	Homologous to pea OEP16 and barley pPORA (OEP16), a member of Arabidopsis OEP16 family. Two OEP16 genes are closely related to each other and are conserved in all land plants, OEP16-2, also named OEP16-S, and OEP16-1 (renamed OEP16-L) are result of the gene duplication event that occurred prior to divergence of bryophytes and seed plants. Predominantly expressed in seed and is not inducible by co…	protein_coding	(ATOEP16-2)	(ATOEP16-S); (ATOEP16-2)	3.41587	-2.14216	4.2877	0.000114939	0.00241571	0.875345
AT1G10070	AT1G10070.1	Encodes a chloroplast branched-chain amino acid aminotransferase. Complements the yeast leu/iso-leu/val auxotrophy mutant.	protein_coding	BRANCHED-CHAIN AMINO ACID TRANSAMINASE 2 (BCAT-2)	BRANCHED-CHAIN AMINO ACID TRANSAMINASE 2 (ATBCAT-2);BRANCHED-CHAIN AMINO ACID TRANSAMINASE 2 (BCAT-2)	3.40938	6.8705	4.36915	8.96e-05	0.00201658	1.15151
AT5G59820	AT5G59820.1	Encodes a zinc finger protein involved in high light and cold acclimation. Overexpression of this putative transcription factor increases the expression level of 9 cold-responsive genes and represses the expression level of 15 cold-responsive genes, including CBF genes. Also, lines overexpressing this gene exhibits a small but reproducible increase in freeze tolerance. Because of the repression o…	protein_coding	RESPONSIVE TO HIGH LIGHT 41 (RHL41)	(ATZAT12);RESPONSIVE TO HIGH LIGHT 41 (RHL41); (ZAT12)	3.38278	3.89715	6.75525	4.68e-08	8.54e-06	8.47166
AT1G60190	AT1G60190.1	Encodes PUB19, a plant U-box armadillo repeat protein. Involved in salt inhibition of germination together with PUB18.	protein_coding	PLANT U-BOX 19 (PUB19)	PLANT U-BOX 19 (PUB19); (AtPUB19)	3.31194	2.19023	3.07591	0.00382716	0.0289477	-1.88142
AT1G33760	AT1G33760.1	encodes a member of the DREB subfamily A-4 of ERF/AP2 transcription factor family. The protein contains one AP2 domain. There are 17 members in this subfamily including TINY.	protein_coding			3.30775	-1.17374	3.9015	0.000367584	0.00550904	0.124262
AT3G61190	AT3G61190.1	Encodes a protein with a C2 domain that binds to BON1 in yeast two hybrid analyses. Its ability to bind to phospholipids is enhanced by calcium ions. Involved in maintaining cell homeostasis.	protein_coding	BON ASSOCIATION PROTEIN 1 (BAP1)	BON ASSOCIATION PROTEIN 1 (BAP1)	3.30342	1.94175	5.62555	1.72e-06	0.000116238	5.0455
AT2G05540	AT2G05540.1	Glycine-rich protein family; LOCATED IN: endomembrane system; EXPRESSED IN: 20 plant structures; EXPRESSED DURING: 9 growth stages; CONTAINS InterPro DOMAIN/s: Glycine rich protein (InterPro:IPR010800); BEST Arabidopsis thaliana protein match is: glycine-rich protein 3 (TAIR:AT2G05520.4); Has 20980 Blast hits to 7546 proteins in 779 species: Archae - 6; Bacteria - 3254; Metazoa - 9284; Fungi - 16…	protein_coding			3.29914	6.54142	6.56549	8.55e-08	1.27e-05	7.86261
AT5G17350	AT5G17350.1	unknown protein; FUNCTIONS IN: molecular_function unknown; INVOLVED IN: N-terminal protein myristoylation; LOCATED IN: cellular_component unknown; EXPRESSED IN: 15 plant structures; EXPRESSED DURING: 8 growth stages; BEST Arabidopsis thaliana protein match is: unknown protein (TAIR:AT3G03280.1); Has 1807 Blast hits to 1807 proteins in 277 species: Archae - 0; Bacteria - 0; Metazoa - 736; Fungi - …	protein_coding			3.27294	1.0989	5.78667	1.03e-06	8.05e-05	5.40909
AT5G37260	AT5G37260.1	Encodes a MYB family transcription factor Circadian 1 (CIR1). Involved in circadian regulation in Arabidopsis.	protein_coding	REVEILLE 2 (RVE2)	REVEILLE 2 (RVE2);CIRCADIAN 1 (CIR1)	3.2597	3.9112	6.68764	5.79e-08	9.79e-06	8.19368
AT2G04040	AT2G04040.1	AtDTX1 (At2g04040) has been identified as a detoxifying efflux carrier for plant-derived antibiotics and other toxic compounds, including CD2+. Mistakenly referred to as At2g04070 in PMID:11739388.	protein_coding	DETOXIFICATION 1 (DTX1)	(TX1);DETOXIFICATION 1 (DTX1); (ATDTX1)	3.23389	1.93126	2.82898	0.00734137	0.0461806	-2.41604
AT1G80555	AT1G80555.1	Isocitrate/isopropylmalate dehydrogenase family protein; FUNCTIONS IN: NAD or NADH binding, 3-isopropylmalate dehydrogenase activity, oxidoreductase activity, acting on the CH-OH group of donors, NAD or NADP as acceptor, magnesium ion binding; INVOLVED IN: oxidation reduction, leucine biosynthetic process; LOCATED IN: chloroplast, cytoplasm; CONTAINS InterPro DOMAIN/s: Isopropylmalate dehydrogena…	protein_coding			3.22382	-0.962279	5.42324	3.28e-06	0.000185388	3.69066
AT2G45360	AT2G45360.1	Protein of unknown function (DUF1442); CONTAINS InterPro DOMAIN/s: Protein of unknown function DUF1442 (InterPro:IPR009902); BEST Arabidopsis thaliana protein match is: Protein of unknown function (DUF1442) (TAIR:AT3G60780.1); Has 113 Blast hits to 112 proteins in 16 species: Archae - 0; Bacteria - 6; Metazoa - 0; Fungi - 0; Plants - 107; Viruses - 0; Other Eukaryotes - 0 (source: NCBI BLink).	protein_coding			3.2143	-1.7144	4.21603	0.000142966	0.00280809	0.713746
AT4G25470	AT4G25470.1	Encodes a member of the DREB subfamily A-1 of ERF/AP2 transcription factor family (CBF2). The protein contains one AP2 domain. There are six members in this subfamily, including CBF1, CBF2, and CBF3. This gene is involved in response to low temperature, abscisic acid, and circadian rhythm. Overexpressing this gene leads to increased freeze tolerance and induces the expression level of 85 cold-ind…	protein_coding	C-REPEAT/DRE BINDING FACTOR 2 (CBF2)	(ATCBF2);FREEZING TOLERANCE QTL 4 (FTQ4);C-REPEAT/DRE BINDING FACTOR 2 (CBF2);DRE/CRT-BINDING PROTEIN 1C (DREB1C)	3.18416	2.20835	4.53566	5.36e-05	0.00144058	1.8569
AT2G17660	AT2G17660.1	RPM1-interacting protein 4 (RIN4) family protein; CONTAINS InterPro DOMAIN/s: RPM1-interacting protein 4, defence response (InterPro:IPR008700); BEST Arabidopsis thaliana protein match is: RPM1-interacting protein 4 (RIN4) family protein (TAIR:AT4G35655.1); Has 277 Blast hits to 276 proteins in 36 species: Archae - 0; Bacteria - 0; Metazoa - 0; Fungi - 0; Plants - 275; Viruses - 0; Other Eukaryot…	protein_coding			3.17095	-0.513519	3.19267	0.00278776	0.0230633	-1.62223
AT4G27654	AT4G27654.1	unknown protein; FUNCTIONS IN: molecular_function unknown; INVOLVED IN: biological_process unknown; LOCATED IN: endomembrane system; EXPRESSED IN: 17 plant structures; EXPRESSED DURING: 9 growth stages; Has 30201 Blast hits to 17322 proteins in 780 species: Archae - 12; Bacteria - 1396; Metazoa - 17338; Fungi - 3422; Plants - 5037; Viruses - 0; Other Eukaryotes - 2996 (source: NCBI BLink).	protein_coding			3.1698	0.163465	4.91728	1.63e-05	0.000603144	2.91491
AT4G01360	AT4G01360.1	Encodes a protein related to BYPASS1 (BPS1). Regulates production of mobile compound: bps signal.	protein_coding	BYPASS 3 (BPS3)	BYPASS 3 (BPS3)	3.16824	1.25115	4.09239	0.000207794	0.00366651	0.616695
AT2G32950	AT2G32950.1	Represses photomorphogenesis and induces skotomorphogenesis in the dark. Contains a ring finger zinc-binding motif, a coiled-coil domain, and several WD-40 repeats, similar to G-beta proteins. The C-terminus has homology to TAFII80, a subunit of the TFIID component of the RNA polymerase II of Drosophila. Nuclear localization in the dark and cytoplasmic in the light.	protein_coding	CONSTITUTIVE PHOTOMORPHOGENIC 1 (COP1)	EMBRYO DEFECTIVE 168 (EMB168);FUSCA 1 (FUS1);CONSTITUTIVE PHOTOMORPHOGENIC 1 (COP1);ARABIDOPSIS THALIANA CONSTITUTIVE PHOTOMORPHOGENIC 1 (ATCOP1);DEETIOLATED MUTANT 340 (DET340)	3.14894	-2.35544	5.77694	1.06e-06	7.91e-05	5.47094
AT1G30730	AT1G30730.1	FAD-binding Berberine family protein; FUNCTIONS IN: electron carrier activity, oxidoreductase activity, FAD binding, catalytic activity; LOCATED IN: endomembrane system; CONTAINS InterPro DOMAIN/s: FAD-binding, type 2 (InterPro:IPR016166), Berberine/berberine-like (InterPro:IPR012951), FAD linked oxidase, N-terminal (InterPro:IPR006094); BEST Arabidopsis thaliana protein match is: FAD-binding Ber…	protein_coding			3.12374	1.92404	3.26024	0.00231508	0.0203643	-1.49345
AT4G11280	AT4G11280.1	encodes a a member of the 1-aminocyclopropane-1-carboxylate (ACC) synthase (S-adenosyl-L-methionine methylthioadenosine-lyase, EC 4.4.1.14) gene family	protein_coding	1-AMINOCYCLOPROPANE-1-CARBOXYLIC ACID (ACC) SYNTHASE 6 (ACS6)	1-AMINOCYCLOPROPANE-1-CARBOXYLIC ACID (ACC) SYNTHASE 6 (ACS6); (ATACS6)	3.12155	4.92506	8.00777	9.3e-10	5.08e-07	12.2584
AT4G13395	AT4G13395.1	ROTUNDIFOLIA like 12 (RTFL12); CONTAINS InterPro DOMAIN/s: DVL (InterPro:IPR012552); BEST Arabidopsis thaliana protein match is: ROTUNDIFOLIA like 10 (TAIR:AT3G14362.1); Has 139 Blast hits to 139 proteins in 12 species: Archae - 0; Bacteria - 0; Metazoa - 0; Fungi - 0; Plants - 139; Viruses - 0; Other Eukaryotes - 0 (source: NCBI BLink).	protein_coding	ROTUNDIFOLIA LIKE 12 (RTFL12)	DEVIL 10 (DVL10);ROTUNDIFOLIA LIKE 12 (RTFL12)	3.09402	3.25554	4.73457	2.89e-05	0.000917511	2.37096
AT3G61198	AT3G61198.1	Unknown gene	other_rna			3.09024	0.84647	3.90773	0.000360855	0.00542736	0.143028
AT3G46690	AT3G46690.1	UDP-Glycosyltransferase superfamily protein; FUNCTIONS IN: UDP-glycosyltransferase activity, transferase activity, transferring glycosyl groups; INVOLVED IN: metabolic process; EXPRESSED IN: root; CONTAINS InterPro DOMAIN/s: UDP-glucuronosyl/UDP-glucosyltransferase (InterPro:IPR002213); BEST Arabidopsis thaliana protein match is: UDP-Glycosyltransferase superfamily protein (TAIR:AT3G46680.1); Has…	protein_coding			3.06912	1.65602	3.26333	0.00229543	0.0202594	-1.45625
AT3G28740	AT3G28740.1	Encodes a member of the cytochrome p450 family. Expression is upregulated in response to cis-jasmonate treatment. Overexpression induces synthesis of volatile compounds that affect chemical ecology and insect interactions.	protein_coding	CYTOCHROME P450, FAMILY 81, SUBFAMILY D, POLYPEPTIDE 11 (CYP81D11)	CYTOCHROME P450, FAMILY 81, SUBFAMILY D, POLYPEPTIDE 11 (CYP81D11)	3.04919	5.30739	3.38105	0.00165373	0.0161468	-1.2033
AT4G35770	AT4G35770.1	Senescence-associated gene that is strongly induced by phosphate starvation. Transcripts are differentially regulated at the level of mRNA stability at different times of day. mRNAs are targets of the mRNA degradation pathway mediated by the downstream (DST) instability determinant.	protein_coding	SENESCENCE 1 (SEN1)	DARK INDUCIBLE 1 (DIN1);ARABIDOPSIS THALIANA SENESCENCE 1 (ATSEN1);SENESCENCE ASSOCIATED GENE 1 (SEN1);SENESCENCE 1 (SEN1)	3.02208	8.2305	4.47213	6.53e-05	0.00164492	1.51954
AT1G15330	AT1G15330.1	Cystathionine beta-synthase (CBS) protein; CONTAINS InterPro DOMAIN/s: Cystathionine beta-synthase, core (InterPro:IPR000644); BEST Arabidopsis thaliana protein match is: Cystathionine beta-synthase (CBS) family protein (TAIR:AT1G80090.1); Has 526 Blast hits to 526 proteins in 132 species: Archae - 6; Bacteria - 4; Metazoa - 257; Fungi - 91; Plants - 124; Viruses - 0; Other Eukaryotes - 44 (sourc…	protein_coding			3.00288	1.53788	5.91017	6.93e-07	6.14e-05	5.86216
AT1G73066	AT1G73066.1	Leucine-rich repeat family protein; INVOLVED IN: biological_process unknown; LOCATED IN: endomembrane system; EXPRESSED IN: embryo, pedicel, carpel, stamen; EXPRESSED DURING: 4 anthesis, C globular stage, petal differentiation and expansion stage; CONTAINS InterPro DOMAIN/s: Leucine-rich repeat-containing N-terminal domain, type 2 (InterPro:IPR013210), Leucine-rich repeat (InterPro:IPR001611); BE…	protein_coding			2.99968	1.43045	4.46425	6.69e-05	0.00166345	1.51
AT1G65500	AT1G65500.1	unknown protein; FUNCTIONS IN: molecular_function unknown; INVOLVED IN: biological_process unknown; LOCATED IN: endomembrane system; EXPRESSED IN: 14 plant structures; EXPRESSED DURING: 9 growth stages; BEST Arabidopsis thaliana protein match is: unknown protein (TAIR:AT1G65486.1); Has 23 Blast hits to 23 proteins in 2 species: Archae - 0; Bacteria - 0; Metazoa - 0; Fungi - 0; Plants - 23; Viruse…	protein_coding			2.99368	0.985222	3.40536	0.00154452	0.0153263	-1.12659
AT4G28040	AT4G28040.1	nodulin MtN21-like transporter family protein	protein_coding			2.98722	4.67729	5.42269	3.28e-06	0.000185388	4.35605
AT3G23250	AT3G23250.1	Member of the R2R3 factor gene family.	protein_coding	MYB DOMAIN PROTEIN 15 (MYB15)	MYB DOMAIN PROTEIN 15 (ATMYB15);MYB DOMAIN PROTEIN 15 (MYB15); (ATY19)	2.97493	0.928386	3.13823	0.00323384	0.0255651	-1.75061
AT5G43620	AT5G43620.1	Pre-mRNA cleavage complex II; FUNCTIONS IN: zinc ion binding; INVOLVED IN: biological_process unknown; LOCATED IN: intracellular; CONTAINS InterPro DOMAIN/s: Zinc finger, C2H2-type (InterPro:IPR007087); BEST Arabidopsis thaliana protein match is: Pre-mRNA cleavage complex II (TAIR:AT1G66500.1); Has 1807 Blast hits to 1807 proteins in 277 species: Archae - 0; Bacteria - 0; Metazoa - 736; Fungi - 3…	protein_coding			2.96946	2.54368	9.47022	1.18e-11	3.47e-08	16.0354
AT5G56970	AT5G56970.1	It encodes a protein whose sequence is similar to cytokinin oxidase/dehydrogenase, which catalyzes the degradation of cytokinins.	protein_coding	CYTOKININ OXIDASE 3 (CKX3)	(ATCKX3);CYTOKININ OXIDASE 3 (CKX3)	2.96539	-2.17202	4.43367	7.35e-05	0.00178343	1.20556
AT2G26010	AT2G26010.1	Predicted to encode a PR (pathogenesis-related) protein. Belongs to the plant defensin (PDF) family with the following members: At1g75830/PDF1.1, At5g44420/PDF1.2a, At2g26020/PDF1.2b, At5g44430/PDF1.2c, At2g26010/PDF1.3, At1g19610/PDF1.4, At1g55010/PDF1.5, At2g02120/PDF2.1, At2g02100/PDF2.2, At2g02130/PDF2.3, At1g61070/PDF2.4, At5g63660/PDF2.5, At2g02140/PDF2.6, At5g38330/PDF3.1 and At4g30070/PDF…	protein_coding	PLANT DEFENSIN 1.3 (PDF1.3)	PLANT DEFENSIN 1.3 (PDF1.3)	2.95706	-2.24124	4.40233	8.09e-05	0.00189219	1.47958
AT1G66500	AT1G66500.1	Pre-mRNA cleavage complex II; FUNCTIONS IN: zinc ion binding; INVOLVED IN: biological_process unknown; LOCATED IN: intracellular; EXPRESSED IN: male gametophyte, pollen tube; EXPRESSED DURING: L mature pollen stage, M germinated pollen stage; CONTAINS InterPro DOMAIN/s: Zinc finger, C2H2-type (InterPro:IPR007087); BEST Arabidopsis thaliana protein match is: Pre-mRNA cleavage complex II (TAIR:AT5G…	protein_coding			2.94198	3.20114	9.1828	2.73e-11	5.2e-08	15.5639
AT3G32980	AT3G32980.1	Peroxidase superfamily protein; FUNCTIONS IN: peroxidase activity, heme binding; INVOLVED IN: response to oxidative stress, oxidation reduction; LOCATED IN: cell wall, vacuole, membrane; EXPRESSED IN: leaf; EXPRESSED DURING: seedling growth; CONTAINS InterPro DOMAIN/s: Haem peroxidase (InterPro:IPR010255), Plant peroxidase (InterPro:IPR000823), Peroxidases heam-ligand binding site (InterPro:IPR01…	protein_coding			2.9396	4.67312	6.66101	6.31e-08	1.01e-05	7.89229
AT1G20310	AT1G20310.1	unknown protein; FUNCTIONS IN: molecular_function unknown; INVOLVED IN: biological_process unknown; LOCATED IN: chloroplast; EXPRESSED IN: 16 plant structures; EXPRESSED DURING: 9 growth stages; BEST Arabidopsis thaliana protein match is: unknown protein (TAIR:AT1G76070.1); Has 46 Blast hits to 46 proteins in 12 species: Archae - 0; Bacteria - 0; Metazoa - 0; Fungi - 0; Plants - 46; Viruses - 0; …	protein_coding			2.87884	-1.65914	3.1127	0.00346548	0.0268406	-1.80363
AT1G58190	AT1G58190.2	receptor like protein 9 (RLP9); INVOLVED IN: signal transduction; LOCATED IN: endomembrane system; CONTAINS InterPro DOMAIN/s: Leucine-rich repeat, typical subtype (InterPro:IPR003591), Leucine-rich repeat-containing N-terminal domain, type 2 (InterPro:IPR013210), Leucine-rich repeat (InterPro:IPR001611); BEST Arabidopsis thaliana protein match is: receptor like protein 13 (TAIR:AT1G74170.1).	protein_coding	RECEPTOR LIKE PROTEIN 9 (RLP9)	RECEPTOR LIKE PROTEIN 9 (RLP9)	2.87482	3.34676	4.39697	8.22e-05	0.0019104	1.46862
AT1G19540	AT1G19540.1	NmrA-like negative transcriptional regulator family protein; FUNCTIONS IN: binding, catalytic activity; INVOLVED IN: metabolic process; LOCATED IN: cellular_component unknown; EXPRESSED IN: 18 plant structures; EXPRESSED DURING: 11 growth stages; CONTAINS InterPro DOMAIN/s: NAD(P)-binding domain (InterPro:IPR016040), NmrA-like (InterPro:IPR008030); BEST Arabidopsis thaliana protein match is: NmrA…	protein_coding			2.86562	3.75792	4.15582	0.00017159	0.00322549	0.793974
AT2G20880	AT2G20880.1	Encodes ERF53, a drought-induced transcription factor. Belongs to the AP2/ERF superfamily, and has a highly conserved AP2 domain. Regulates drought-responsive gene expressions by binding to the GCC box and/or dehydration-responsive element (DRE) in the promoter of downstream genes. Overexpression of AtERF53 driven by the CaMV35S promoter resulted in an unstable drought-tolerant phenotype in T2 tr…	protein_coding	ERF DOMAIN 53 (ERF53)	(ATERF53);ERF DOMAIN 53 (ERF53)	2.86313	0.303869	4.34737	9.58e-05	0.00211446	1.09126
AT5G13330	AT5G13330.1	encodes a member of the ERF (ethylene response factor) subfamily B-4 of ERF/AP2 transcription factor family. The protein contains one AP2 domain. There are 7 members in this subfamily.	protein_coding	RELATED TO AP2 6L (Rap2.6L)	RELATED TO AP2 6L (Rap2.6L)	2.85629	2.74708	3.44387	0.00138548	0.0141768	-1.031
AT2G27080	AT2G27080.1	Late embryogenesis abundant (LEA) hydroxyproline-rich glycoprotein family; CONTAINS InterPro DOMAIN/s: Late embryogenesis abundant protein, group 2 (InterPro:IPR004864); BEST Arabidopsis thaliana protein match is: Late embryogenesis abundant (LEA) hydroxyproline-rich glycoprotein family (TAIR:AT5G21130.1); Has 1062 Blast hits to 1061 proteins in 28 species: Archae - 0; Bacteria - 0; Metazoa - 0; …	protein_coding			2.84961	3.60392	6.33248	1.8e-07	2.17e-05	7.1868
AT1G63030	AT1G63030.1	encodes a member of the DREB subfamily A-1 of ERF/AP2 transcription factor family (DDF2). The protein contains one AP2 domain. There are six members in this subfamily, including CBF1, CBF2, and CBF3. Overexpression of this gene results in the reduction of gibberellic acid biosynthesis. This gene is expressed in all tissues examined, but most abundantly expressed in rosette leaves and stems. Overe…	protein_coding	DWARF AND DELAYED FLOWERING 2 (ddf2)	DWARF AND DELAYED FLOWERING 2 (ddf2)	2.82682	-2.38539	3.62614	0.000822944	0.00978446	-0.670508
AT1G18300	AT1G18300.1	nudix hydrolase homolog 4 (NUDT4); FUNCTIONS IN: hydrolase activity; LOCATED IN: cytosol; EXPRESSED IN: stem, root, leaf; CONTAINS InterPro DOMAIN/s: NUDIX hydrolase domain-like (InterPro:IPR015797), NUDIX hydrolase, conserved site (InterPro:IPR020084), NUDIX hydrolase domain (InterPro:IPR000086); BEST Arabidopsis thaliana protein match is: nudix hydrolase homolog 21 (TAIR:AT1G73540.1); Has 1264 …	protein_coding	NUDIX HYDROLASE HOMOLOG 4 (NUDT4)	NUDIX HYDROLASE HOMOLOG 4 (atnudt4);NUDIX HYDROLASE HOMOLOG 4 (NUDT4)	2.82082	4.20178	8.2385	4.59e-10	3.64e-07	12.9435
AT4G15670	AT4G15670.1	Thioredoxin superfamily protein; FUNCTIONS IN: electron carrier activity, arsenate reductase (glutaredoxin) activity, protein disulfide oxidoreductase activity; INVOLVED IN: cell redox homeostasis; LOCATED IN: cellular_component unknown; CONTAINS InterPro DOMAIN/s: Glutaredoxin-like, plant II (InterPro:IPR011905), Thioredoxin fold (InterPro:IPR012335), Glutaredoxin (InterPro:IPR002109), Glutaredo…	protein_coding			2.81084	-1.50446	2.85578	0.00684918	0.0437918	-2.36159
AT3G10930	AT3G10930.1	unknown protein; FUNCTIONS IN: molecular_function unknown; INVOLVED IN: biological_process unknown; LOCATED IN: mitochondrion; EXPRESSED IN: 18 plant structures; EXPRESSED DURING: 9 growth stages; Has 1 Blast hits to 1 proteins in 1 species: Archae - 0; Bacteria - 0; Metazoa - 0; Fungi - 0; Plants - 1; Viruses - 0; Other Eukaryotes - 0 (source: NCBI BLink).	protein_coding			2.8036	2.12132	5.4417	3.09e-06	0.000177841	4.49323
AT2G44790	AT2G44790.1	Encodes a uclacyanin, a protein precursor that is closely related to precursors of stellacyanins and a blue copper protein from pea pods.	protein_coding	UCLACYANIN 2 (UCC2)	UCLACYANIN 2 (UCC2)	2.79993	5.15048	5.34425	4.22e-06	0.000228158	4.14947
AT3G19390	AT3G19390.1	Granulin repeat cysteine protease family protein; FUNCTIONS IN: cysteine-type endopeptidase activity, cysteine-type peptidase activity; INVOLVED IN: proteolysis; LOCATED IN: endomembrane system; EXPRESSED IN: 9 plant structures; EXPRESSED DURING: 4 anthesis, petal differentiation and expansion stage; CONTAINS InterPro DOMAIN/s: Peptidase C1A, papain (InterPro:IPR013128), Proteinase inhibitor I29,…	protein_coding			2.77437	3.89502	4.0568	0.00023126	0.00392226	0.487091
AT1G73540	AT1G73540.1	nudix hydrolase homolog 21 (NUDT21); FUNCTIONS IN: hydrolase activity; INVOLVED IN: biological_process unknown; LOCATED IN: chloroplast; EXPRESSED IN: 24 plant structures; EXPRESSED DURING: 15 growth stages; CONTAINS InterPro DOMAIN/s: NUDIX hydrolase domain-like (InterPro:IPR015797), NUDIX hydrolase, conserved site (InterPro:IPR020084), NUDIX hydrolase domain (InterPro:IPR000086); BEST Arabidops…	protein_coding	NUDIX HYDROLASE HOMOLOG 21 (NUDT21)	NUDIX HYDROLASE HOMOLOG 21 (atnudt21);NUDIX HYDROLASE HOMOLOG 21 (NUDT21)	2.77238	4.67724	6.89067	3.04e-08	6.09e-06	8.86269
AT3G48390	AT3G48390.1	MA3 domain-containing protein; CONTAINS InterPro DOMAIN/s: Initiation factor eIF-4 gamma, MA3 (InterPro:IPR003891); BEST Arabidopsis thaliana protein match is: MA3 domain-containing protein (TAIR:AT5G63190.2); Has 1943 Blast hits to 788 proteins in 111 species: Archae - 0; Bacteria - 0; Metazoa - 1171; Fungi - 12; Plants - 600; Viruses - 0; Other Eukaryotes - 160 (source: NCBI BLink).	protein_coding			2.76515	4.06045	4.97258	1.37e-05	0.000533072	3.01609
AT3G21710	AT3G21710.2	unknown protein; Has 35333 Blast hits to 34131 proteins in 2444 species: Archae - 798; Bacteria - 22429; Metazoa - 974; Fungi - 991; Plants - 531; Viruses - 0; Other Eukaryotes - 9610 (source: NCBI BLink).	protein_coding			2.76281	1.59334	4.37669	8.75e-05	0.00198483	1.05584
AT5G08360	AT5G08360.1	Protein of unknown function (DUF789); CONTAINS InterPro DOMAIN/s: Protein of unknown function DUF789 (InterPro:IPR008507); BEST Arabidopsis thaliana protein match is: Protein of unknown function (DUF789) (TAIR:AT5G23380.1); Has 30201 Blast hits to 17322 proteins in 780 species: Archae - 12; Bacteria - 1396; Metazoa - 17338; Fungi - 3422; Plants - 5037; Viruses - 0; Other Eukaryotes - 2996 (source…	protein_coding			2.72942	-0.368052	5.1115	8.82e-06	0.000385184	3.10851
AT1G18280	AT1G18280.1	Bifunctional inhibitor/lipid-transfer protein/seed storage 2S albumin superfamily protein; CONTAINS InterPro DOMAIN/s: Bifunctional inhibitor/plant lipid transfer protein/seed storage (InterPro:IPR016140), Plant lipid transfer protein/seed storage/trypsin-alpha amylase inhibitor (InterPro:IPR003612); BEST Arabidopsis thaliana protein match is: Bifunctional inhibitor/lipid-transfer protein/seed st…	protein_coding			2.72813	-0.650845	2.88746	0.00630702	0.0415136	-2.28789
AT2G40000	AT2G40000.1	ortholog of sugar beet HS1 PRO-1 2 (HSPRO2); CONTAINS InterPro DOMAIN/s: Hs1pro-1, C-terminal (InterPro:IPR009743), Hs1pro-1, N-terminal (InterPro:IPR009869); BEST Arabidopsis thaliana protein match is: Hs1pro-1 protein (TAIR:AT3G55840.1); Has 71 Blast hits to 71 proteins in 18 species: Archae - 0; Bacteria - 0; Metazoa - 0; Fungi - 0; Plants - 60; Viruses - 0; Other Eukaryotes - 11 (source: NCBI…	protein_coding	ORTHOLOG OF SUGAR BEET HS1 PRO-1 2 (HSPRO2)	ORTHOLOG OF SUGAR BEET HS1 PRO-1 2 (HSPRO2);ARABIDOPSIS ORTHOLOG OF SUGAR BEET HS1 PRO-1 2 (ATHSPRO2)	2.6806	8.29556	8.20559	5.08e-10	3.68e-07	12.8462
AT5G14470	AT5G14470.1	GHMP kinase family protein; FUNCTIONS IN: kinase activity, phosphotransferase activity, alcohol group as acceptor, galactokinase activity, ATP binding; INVOLVED IN: metabolic process, phosphorylation; LOCATED IN: cytoplasm; EXPRESSED IN: inflorescence meristem, flower, carpel, pollen tube; EXPRESSED DURING: 4 anthesis, petal differentiation and expansion stage; CONTAINS InterPro DOMAIN/s: Mevalon…	protein_coding			2.6802	2.39824	3.38815	0.00162111	0.0159431	-1.29978
AT4G16690	AT4G16690.1	Encodes a protein shown to have carboxylesterase activity, methyl IAA esterase activity, and methyl jasmonate esterase activity in vitro. This protein does not act on MeSA, MeGA4, or MEGA9 in vitro. Although MES16 is similar to MES17, a MeIAA hydrolase, two mes16 mutant lines (SALK_151578) and (SALK_139756) do not show altered sensitivity to MeIAA in root growth assays. MES16 transcripts appear t…	protein_coding	METHYL ESTERASE 16 (MES16)	ARABIDOPSIS THALIANA METHYL ESTERASE 16 (ATMES16);METHYL ESTERASE 16 (MES16)	2.67911	3.46869	7.65761	2.74e-09	1.13e-06	11.1866
AT5G15720	AT5G15720.1	Contains lipase signature motif and GDSL domain.	protein_coding	GDSL-MOTIF LIPASE 7 (GLIP7)	GDSL-MOTIF LIPASE 7 (GLIP7)	2.64737	-1.42121	2.82875	0.00734563	0.0461923	-2.41032
AT1G72060	AT1G72060.1	serine-type endopeptidase inhibitors; FUNCTIONS IN: serine-type endopeptidase inhibitor activity; INVOLVED IN: response to oxidative stress; LOCATED IN: endomembrane system; EXPRESSED IN: 21 plant structures; EXPRESSED DURING: 12 growth stages; CONTAINS InterPro DOMAIN/s: Proteinase inhibitor I20, Pin2 (InterPro:IPR003465); Has 28 Blast hits to 28 proteins in 8 species: Archae - 0; Bacteria - 0; …	protein_coding			2.6094	2.80985	3.15272	0.00310893	0.0248395	-1.88352
AT1G19610	AT1G19610.1	Predicted to encode a PR (pathogenesis-related) protein. Belongs to the plant defensin (PDF) family with the following members: At1g75830/PDF1.1, At5g44420/PDF1.2a, At2g26020/PDF1.2b, At5g44430/PDF1.2c, At2g26010/PDF1.3, At1g19610/PDF1.4, At1g55010/PDF1.5, At2g02120/PDF2.1, At2g02100/PDF2.2, At2g02130/PDF2.3, At1g61070/PDF2.4, At5g63660/PDF2.5, At2g02140/PDF2.6, At5g38330/PDF3.1 and At4g30070/PDF…	protein_coding	(PDF1.4)	(PDF1.4);LOW-MOLECULAR-WEIGHT CYSTEINE-RICH 78 (LCR78)	2.59766	1.39383	3.71141	0.000642667	0.00824541	-0.369874
AT4G24050	AT4G24050.1	NAD(P)-binding Rossmann-fold superfamily protein; FUNCTIONS IN: oxidoreductase activity, binding, catalytic activity; INVOLVED IN: oxidation reduction, metabolic process; EXPRESSED IN: 15 plant structures; EXPRESSED DURING: 7 growth stages; CONTAINS InterPro DOMAIN/s: NAD(P)-binding domain (InterPro:IPR016040), Glucose/ribitol dehydrogenase (InterPro:IPR002347), Short-chain dehydrogenase/reductas…	protein_coding			2.58115	3.70626	6.5795	8.17e-08	1.23e-05	7.92541
AT3G15950	AT3G15950.1	Similar to TSK-associating protein 1 (TSA1), contains 10 EFE repeats, a novel repeat sequence unique to plants. Expressed preferentially in the roots.Protein is localized to ER bodies- an endoplasmic reticulum derived structure. Loss of function mutations lack ER bodies.	protein_coding	(NAI2)	(NAI2)	2.58102	5.92813	4.80402	2.32e-05	0.000786597	2.61328
AT1G11080	AT1G11080.2	serine carboxypeptidase-like 31 (scpl31); FUNCTIONS IN: serine-type carboxypeptidase activity; INVOLVED IN: proteolysis; LOCATED IN: endomembrane system; EXPRESSED IN: 17 plant structures; EXPRESSED DURING: 4 anthesis, C globular stage, petal differentiation and expansion stage, E expanded cotyledon stage, D bilateral stage; CONTAINS InterPro DOMAIN/s: Peptidase S10, serine carboxypeptidase (Inte…	protein_coding	SERINE CARBOXYPEPTIDASE-LIKE 31 (scpl31)	SERINE CARBOXYPEPTIDASE-LIKE 31 (scpl31)	2.57981	-0.776136	3.12027	0.00339527	0.026443	-1.78282
AT4G10180	AT4G10180.1	Encodes a nuclear-localized protein that acts as a repressor of photomorphogenesis and may be involved in chromatin remodeling.	protein_coding	DE-ETIOLATED 1 (DET1)	(ATDET1);DE-ETIOLATED 1 (DET1);FUSCA 2 (FUS2)	2.5563	0.421155	5.69978	1.26e-06	9.36e-05	5.27292
AT1G69260	AT1G69260.1	ABI five binding protein (AFP1); CONTAINS InterPro DOMAIN/s: Protein of unknown function DUF1675 (InterPro:IPR012463); BEST Arabidopsis thaliana protein match is: ABI five binding protein 2 (TAIR:AT1G13740.1); Has 267 Blast hits to 267 proteins in 42 species: Archae - 0; Bacteria - 6; Metazoa - 29; Fungi - 9; Plants - 184; Viruses - 0; Other Eukaryotes - 39 (source: NCBI BLink).	protein_coding	ABI FIVE BINDING PROTEIN (AFP1)	ABI FIVE BINDING PROTEIN (AFP1)	2.53893	1.64518	3.30988	0.00201752	0.0185391	-1.37209
AT3G23230	AT3G23230.1	encodes a member of the ERF (ethylene response factor) subfamily B-3 of ERF/AP2 transcription factor family. The protein contains one AP2 domain. There are 18 members in this subfamily including ATERF-1, ATERF-2, AND ATERF-5.	protein_coding	TRANSCRIPTIONAL REGULATOR OF DEFENSE RESPONSE 1 (TDR1)	(ATERF98);TRANSCRIPTIONAL REGULATOR OF DEFENSE RESPONSE 1 (TDR1); (ATTDR1);ETHYLENE RESPONSE FACTOR 98 (ERF98)	2.51628	-1.49707	2.94535	0.00541858	0.0371204	-2.16529
AT5G05530	AT5G05530.1	RING/U-box superfamily protein; FUNCTIONS IN: zinc ion binding; CONTAINS InterPro DOMAIN/s: Zinc finger, RING-type (InterPro:IPR001841); BEST Arabidopsis thaliana protein match is: AtL5 (TAIR:AT3G62690.1); Has 1807 Blast hits to 1807 proteins in 277 species: Archae - 0; Bacteria - 0; Metazoa - 736; Fungi - 347; Plants - 385; Viruses - 0; Other Eukaryotes - 339 (source: NCBI BLink).	protein_coding			2.51031	-1.4541	3.43834	0.0014073	0.0143442	-1.11388
AT2G44840	AT2G44840.1	encodes a member of the ERF (ethylene response factor) subfamily B-3 of ERF/AP2 transcription factor family. The protein contains one AP2 domain. There are 18 members in this subfamily including ATERF-1, ATERF-2, AND ATERF-5.	protein_coding	ETHYLENE-RESPONSIVE ELEMENT BINDING FACTOR 13 (ERF13)	ETHYLENE-RESPONSIVE ELEMENT BINDING FACTOR 13 (ERF13);ETHYLENE-RESPONSIVE ELEMENT BINDING FACTOR 13 (ATERF13); (EREBP)	2.50188	0.984799	3.97802	0.000292764	0.0046289	0.278811
AT4G16680	AT4G16680.1	P-loop containing nucleoside triphosphate hydrolases superfamily protein; FUNCTIONS IN: RNA helicase activity, helicase activity, nucleic acid binding, ATP binding, ATP-dependent helicase activity; LOCATED IN: cellular_component unknown; EXPRESSED IN: stem, sepal, male gametophyte, carpel, stamen; EXPRESSED DURING: 4 anthesis, petal differentiation and expansion stage; CONTAINS InterPro DOMAIN/s:…	protein_coding			2.50054	4.81095	6.82046	3.8e-08	7.29e-06	8.64745
AT3G20340	AT3G20340.1	Expression of the gene is downregulated in the presence of paraquat, an inducer of photoxidative stress.	protein_coding			2.49106	3.38632	2.92954	0.00564882	0.0383428	-2.27767
AT3G48360	AT3G48360.1	encodes a protein (BT2) that is an essential component of the TAC1-mediated telomerase activation pathway. Acts redundantly with BT3 and BT1 during female gametophyte development and with BT3 during male gametophyte development. BT2 also mediates multiple responses to nutrients, stresses, and hormones.	protein_coding	BTB AND TAZ DOMAIN PROTEIN 2 (bt2)	(ATBT2);BTB AND TAZ DOMAIN PROTEIN 2 (bt2)	2.47933	7.79809	4.41904	7.69e-05	0.00183798	1.32601
AT5G25260	AT5G25260.1	SPFH/Band 7/PHB domain-containing membrane-associated protein family; FUNCTIONS IN: molecular_function unknown; INVOLVED IN: biological_process unknown; LOCATED IN: plasma membrane; EXPRESSED IN: cultured cell; CONTAINS InterPro DOMAIN/s: Band 7 protein (InterPro:IPR001107); BEST Arabidopsis thaliana protein match is: SPFH/Band 7/PHB domain-containing membrane-associated protein family (TAIR:AT5G…	protein_coding			2.46622	-1.56591	3.12174	0.00338172	0.026357	-1.81617
AT4G24570	AT4G24570.1	Encodes one of the mitochondrial dicarboxylate carriers (DIC): DIC1 (AT2G22500), DIC2 (AT4G24570), DIC3 (AT5G09470).	protein_coding	DICARBOXYLATE CARRIER 2 (DIC2)	DICARBOXYLATE CARRIER 2 (DIC2)	2.46282	3.95266	4.71688	3.05e-05	0.000958048	2.15473
AT1G36060	AT1G36060.1	encodes a member of the DREB subfamily A-6 of ERF/AP2 transcription factor family. The protein contains one AP2 domain. There are 8 members in this subfamily including RAP2.4.	protein_coding			2.45169	2.49952	2.93985	0.00549756	0.0375634	-2.24846
AT3G21870	AT3G21870.1	cyclin p2;1 (CYCP2;1); CONTAINS InterPro DOMAIN/s: Negative regulatory factor PREG (InterPro:IPR012389), Cyclin-like (InterPro:IPR011028), Cyclin-related 2 (InterPro:IPR013922), Cyclin (InterPro:IPR006670); BEST Arabidopsis thaliana protein match is: cyclin p4;1 (TAIR:AT2G44740.1); Has 1311 Blast hits to 1303 proteins in 220 species: Archae - 0; Bacteria - 18; Metazoa - 222; Fungi - 576; Plants -…	protein_coding	CYCLIN P2;1 (CYCP2;1)	CYCLIN P2;1 (CYCP2;1)	2.4273	1.66258	7.13511	1.41e-08	3.52e-06	9.59522
AT1G79360	AT1G79360.1	organic cation/carnitine transporter 2 (2-Oct); FUNCTIONS IN: carbohydrate transmembrane transporter activity, sugar:hydrogen symporter activity; INVOLVED IN: transport, ion transport, transmembrane transport; LOCATED IN: integral to membrane, membrane; EXPRESSED IN: 16 plant structures; EXPRESSED DURING: 8 growth stages; CONTAINS InterPro DOMAIN/s: Major facilitator superfamily (InterPro:IPR0208…	protein_coding	ORGANIC CATION/CARNITINE TRANSPORTER 2 (OCT2)	ORGANIC CATION/CARNITINE TRANSPORTER 2 (OCT2);ORGANIC CATION/CARNITINE TRANSPORTER 2 (ATOCT2);ORGANIC CATION TRANSPORTER 2 (OCT2)	2.42371	1.94314	4.33051	0.000100842	0.00219874	1.28376
AT1G80840	AT1G80840.1	Pathogen-induced transcription factor. Binds W-box sequences in vitro. Forms protein complexes with itself and with WRKY40 and WRKY60. Coexpression with WRKY18 or WRKY60 made plants more susceptible to both P. syringae and B. cinerea. WRKY18, WRKY40, and WRKY60 have partially redundant roles in response to the hemibiotrophic bacterial pathogen Pseudomonas syringae and the necrotrophic fungal path…	protein_coding	WRKY DNA-BINDING PROTEIN 40 (WRKY40)	(ATWRKY40);WRKY DNA-BINDING PROTEIN 40 (WRKY40)	2.41362	4.1672	5.10263	9.08e-06	0.000392884	3.32536
AT1G15010	AT1G15010.1	unknown protein; BEST Arabidopsis thaliana protein match is: unknown protein (TAIR:AT2G01300.1); Has 71 Blast hits to 71 proteins in 13 species: Archae - 0; Bacteria - 2; Metazoa - 0; Fungi - 0; Plants - 69; Viruses - 0; Other Eukaryotes - 0 (source: NCBI BLink).	protein_coding			2.39863	2.98298	5.73773	1.2e-06	8.98e-05	5.38838
AT4G27280	AT4G27280.1	Calcium-binding EF-hand family protein; FUNCTIONS IN: calcium ion binding; INVOLVED IN: response to karrikin; EXPRESSED IN: 23 plant structures; EXPRESSED DURING: 13 growth stages; CONTAINS InterPro DOMAIN/s: EF-Hand 1, calcium-binding site (InterPro:IPR018247), EF-HAND 2 (InterPro:IPR018249), EF-hand-like domain (InterPro:IPR011992); BEST Arabidopsis thaliana protein match is: pinoid-binding pro…	protein_coding			2.39818	4.7116	4.41746	7.72e-05	0.00184269	1.25837
AT1G13340	AT1G13340.1	Regulator of Vps4 activity in the MVB pathway protein; CONTAINS InterPro DOMAIN/s: Protein of unknown function DUF292, eukaryotic (InterPro:IPR005061); BEST Arabidopsis thaliana protein match is: Regulator of Vps4 activity in the MVB pathway protein (TAIR:AT1G34220.2); Has 628 Blast hits to 628 proteins in 152 species: Archae - 0; Bacteria - 0; Metazoa - 164; Fungi - 130; Plants - 284; Viruses - …	protein_coding			2.39284	1.83889	3.41079	0.00152107	0.0151436	-1.10811
AT5G57560	AT5G57560.1	Encodes a cell wall-modifying enzyme, rapidly upregulated in response to environmental stimuli	protein_coding	TOUCH 4 (TCH4)	XYLOGLUCAN ENDOTRANSGLUCOSYLASE/HYDROLASE 22 (XTH22);TOUCH 4 (TCH4)	2.3887	6.66191	4.81812	2.22e-05	0.000761719	2.48514
AT1G02850	AT1G02850.4	beta glucosidase 11 (BGLU11); FUNCTIONS IN: cation binding, hydrolase activity, hydrolyzing O-glycosyl compounds, catalytic activity; INVOLVED IN: carbohydrate metabolic process; LOCATED IN: endomembrane system; EXPRESSED IN: 24 plant structures; EXPRESSED DURING: 13 growth stages; CONTAINS InterPro DOMAIN/s: Glycoside hydrolase, family 1 (InterPro:IPR001360), Glycoside hydrolase, family 1, activ…	protein_coding	BETA GLUCOSIDASE 11 (BGLU11)	BETA GLUCOSIDASE 11 (BGLU11)	2.38521	4.84067	3.3104	0.0020146	0.0185351	-1.391
AT1G10340	AT1G10340.1	Ankyrin repeat family protein; CONTAINS InterPro DOMAIN/s: Ankyrin repeat-containing domain (InterPro:IPR020683), Ankyrin repeat (InterPro:IPR002110); BEST Arabidopsis thaliana protein match is: Ankyrin repeat family protein (TAIR:AT2G24600.4); Has 23228 Blast hits to 12811 proteins in 577 species: Archae - 31; Bacteria - 1612; Metazoa - 12827; Fungi - 1604; Plants - 2793; Viruses - 138; Other Eu…	protein_coding			2.37747	1.62386	4.03403	0.000247607	0.00410989	0.448844
AT2G30020	AT2G30020.1	Encodes AP2C1. Belongs to the clade B of the PP2C-superfamily. Acts as a MAPK phosphatase that negatively regulates MPK4 and MPK6.	protein_coding			2.37467	4.21258	6.81674	3.85e-08	7.29e-06	8.6568
AT1G14860	AT1G14860.1	nudix hydrolase homolog 18 (NUDT18); FUNCTIONS IN: hydrolase activity; INVOLVED IN: biological_process unknown; CONTAINS InterPro DOMAIN/s: NUDIX hydrolase domain-like (InterPro:IPR015797), NUDIX hydrolase, conserved site (InterPro:IPR020084), NUDIX hydrolase domain (InterPro:IPR000086); BEST Arabidopsis thaliana protein match is: nudix hydrolase homolog 17 (TAIR:AT2G01670.1); Has 1011 Blast hits…	protein_coding	NUDIX HYDROLASE HOMOLOG 18 (NUDT18)	NUDIX HYDROLASE HOMOLOG 18 (atnudt18);NUDIX HYDROLASE HOMOLOG 18 (NUDT18)	2.36807	2.15416	3.66077	0.000744512	0.00909396	-0.525543
AT4G15530	AT4G15530.5	Encodes a dual-targeted protein believed to act as a pyruvate, orthophosphate dikinase. These enzymes are normally associated with C4 photosynthesis which does not occur in Arabidopsis. However, PPDK may play a role in remobilizing nitrogen during leaf senescence in Arabidopsis. The product of the long transcript (.1 gene model) was shown to be targeted to the chloroplast, whereas the shorter tra…	protein_coding	PYRUVATE ORTHOPHOSPHATE DIKINASE (PPDK)	PYRUVATE ORTHOPHOSPHATE DIKINASE (PPDK)	2.35875	7.22104	6.41456	1.38e-07	1.79e-05	7.38899
AT2G30370	AT2G30370.1	Encodes a small, potentially secreted protein that acts as an inhibitor of stomatal production though likely not through direct interaction with the TMM receptor. It is homologous to known stomatal regulators EPF1 and EPF2.	protein_coding	CHALLAH (CHAL)	EPF1-LIKE 6 (EPFL6);CHALLAH (CHAL)	2.35182	0.0309495	3.40546	0.00154408	0.0153263	-1.16697
AT2G25460	AT2G25460.1	CONTAINS InterPro DOMAIN/s: C2 calcium-dependent membrane targeting (InterPro:IPR000008); BEST Arabidopsis thaliana protein match is: unknown protein (TAIR:AT5G04860.1); Has 108 Blast hits to 69 proteins in 11 species: Archae - 0; Bacteria - 0; Metazoa - 0; Fungi - 0; Plants - 108; Viruses - 0; Other Eukaryotes - 0 (source: NCBI BLink).	protein_coding			2.3309	1.63579	2.95298	0.00531054	0.0366192	-2.21379
AT1G12080	AT1G12080.2	Vacuolar calcium-binding protein-related; BEST Arabidopsis thaliana protein match is: Vacuolar calcium-binding protein-related (TAIR:AT1G62480.1); Has 21609 Blast hits to 9169 proteins in 1089 species: Archae - 145; Bacteria - 3596; Metazoa - 6157; Fungi - 1827; Plants - 760; Viruses - 333; Other Eukaryotes - 8791 (source: NCBI BLink).	protein_coding			2.30043	6.66218	7.08065	1.67e-08	3.98e-06	9.44737
AT4G37220	AT4G37220.1	Cold acclimation protein WCOR413 family; CONTAINS InterPro DOMAIN/s: Cold acclimation WCOR413 (InterPro:IPR008892); BEST Arabidopsis thaliana protein match is: cold-regulated 413-plasma membrane 2 (TAIR:AT3G50830.1); Has 160 Blast hits to 157 proteins in 29 species: Archae - 0; Bacteria - 0; Metazoa - 0; Fungi - 0; Plants - 160; Viruses - 0; Other Eukaryotes - 0 (source: NCBI BLink).	protein_coding			2.29092	5.18015	3.9182	0.00034982	0.00531965	0.0147619
AT4G08040	AT4G08040.1	encodes an aminotransferase that belongs to ACC synthase gene family structurally	protein_coding	1-AMINOCYCLOPROPANE-1-CARBOXYLATE SYNTHASE 11 (ACS11)	1-AMINOCYCLOPROPANE-1-CARBOXYLATE SYNTHASE 11 (ACS11)	2.28622	2.25053	7.09612	1.59e-08	3.88e-06	9.50657
AT4G28530	AT4G28530.1	NAC domain containing protein 74 (NAC074); FUNCTIONS IN: sequence-specific DNA binding transcription factor activity; INVOLVED IN: multicellular organismal development, regulation of transcription; LOCATED IN: cellular_component unknown; EXPRESSED IN: 18 plant structures; EXPRESSED DURING: 13 growth stages; CONTAINS InterPro DOMAIN/s: No apical meristem (NAM) protein (InterPro:IPR003441); BEST Ar…	protein_coding	NAC DOMAIN CONTAINING PROTEIN 74 (NAC074)	NAC DOMAIN CONTAINING PROTEIN 74 (NAC074);NAC DOMAIN CONTAINING PROTEIN 74 (anac074)	2.2801	-0.842433	2.79999	0.00791083	0.0487394	-2.47211
AT2G32200	AT2G32200.1	unknown protein; BEST Arabidopsis thaliana protein match is: unknown protein (TAIR:AT2G32210.1); Has 131 Blast hits to 131 proteins in 14 species: Archae - 0; Bacteria - 0; Metazoa - 0; Fungi - 1; Plants - 130; Viruses - 0; Other Eukaryotes - 0 (source: NCBI BLink).	protein_coding			2.27789	-0.0796113	2.91378	0.00588732	0.0394687	-2.26679
AT5G59570	AT5G59570.1	Encodes BOA (BROTHER OF LUX ARRHYTHMO), a component of the circadian clock.	protein_coding	BROTHER OF LUX ARRHYTHMO (BOA)	BROTHER OF LUX ARRHYTHMO (BOA)	2.26844	3.47161	8.10325	6.94e-10	4.42e-07	12.5412
AT3G49780	AT3G49780.1	Phytosulfokine 3 precursor, coding for a unique plant peptide growth factor. Plants overexpressing this gene (under a 35S promoter), develop normal cotyledons and hypocotyls but their growth, in particular that of their roots, was faster than that of wildtype.	protein_coding	PHYTOSULFOKINE 4 PRECURSOR (PSK4)	PHYTOSULFOKINE 4 PRECURSOR (ATPSK4);PHYTOSULFOKINE 4 PRECURSOR (PSK4); (ATPSK3 (FORMER SYMBOL))	2.26111	4.29821	4.35634	9.32e-05	0.00207237	1.3296
AT4G08950	AT4G08950.1	EXORDIUM (EXO); FUNCTIONS IN: molecular_function unknown; INVOLVED IN: response to brassinosteroid stimulus; LOCATED IN: cell wall, plant-type cell wall; EXPRESSED IN: 21 plant structures; EXPRESSED DURING: 13 growth stages; CONTAINS InterPro DOMAIN/s: Phosphate-induced protein 1 (InterPro:IPR006766); BEST Arabidopsis thaliana protein match is: Phosphate-responsive 1 family protein (TAIR:AT1G3514…	protein_coding	EXORDIUM (EXO)	EXORDIUM (EXO)	2.24931	6.7252	4.12825	0.000186498	0.0034154	0.404548
AT2G37290	AT2G37290.2	Ypt/Rab-GAP domain of gyp1p superfamily protein; FUNCTIONS IN: RAB GTPase activator activity; INVOLVED IN: regulation of Rab GTPase activity; CONTAINS InterPro DOMAIN/s: RabGAP/TBC (InterPro:IPR000195); BEST Arabidopsis thaliana protein match is: Ypt/Rab-GAP domain of gyp1p superfamily protein (TAIR:AT3G55020.1).	protein_coding			2.23065	-0.438091	4.68839	3.34e-05	0.00102264	2.03822
AT1G74450	AT1G74450.1	FUNCTIONS IN: molecular_function unknown; INVOLVED IN: biological_process unknown; EXPRESSED IN: 24 plant structures; EXPRESSED DURING: 14 growth stages; CONTAINS InterPro DOMAIN/s: Protein BYPASS related (InterPro:IPR008511); BEST Arabidopsis thaliana protein match is: Protein of unknown function (DUF793) (TAIR:AT1G18740.1); Has 215 Blast hits to 212 proteins in 19 species: Archae - 0; Bacteria …	protein_coding			2.22251	4.77927	6.5017	1.05e-07	1.5e-05	7.65731
AT5G45340	AT5G45340.1	Encodes a protein with ABA 8'-hydroxylase activity; involved in ABA catabolism. Mutant analyses show that disruption in the gene results in more drought tolerance whereas overexpression results in increased transpiration rate and reduced drought tolerance. Gene involved in postgermination growth. Plant P450 CYP707A3, ABA 8'-hydroxylase, binds enantioselectively (+)-ABA but not (-)-ABA, whereas th…	protein_coding	"CYTOCHROME P450, FAMILY 707, SUBFAMILY A, POLYPEPTIDE 3" (CYP707A3)	"CYTOCHROME P450, FAMILY 707, SUBFAMILY A, POLYPEPTIDE 3" (CYP707A3)	2.21512	4.19292	4.46548	6.66e-05	0.00166345	1.42314
AT1G10530	AT1G10530.1	unknown protein; FUNCTIONS IN: molecular_function unknown; INVOLVED IN: N-terminal protein myristoylation; BEST Arabidopsis thaliana protein match is: unknown protein (TAIR:AT1G60010.1); Has 143 Blast hits to 143 proteins in 14 species: Archae - 0; Bacteria - 0; Metazoa - 0; Fungi - 0; Plants - 143; Viruses - 0; Other Eukaryotes - 0 (source: NCBI BLink).	protein_coding			2.21337	-1.2622	3.03284	0.00429576	0.0313732	-1.99621
AT2G32210	AT2G32210.1	unknown protein; BEST Arabidopsis thaliana protein match is: unknown protein (TAIR:AT2G32190.1); Has 214 Blast hits to 214 proteins in 21 species: Archae - 0; Bacteria - 0; Metazoa - 1; Fungi - 10; Plants - 203; Viruses - 0; Other Eukaryotes - 0 (source: NCBI BLink).	protein_coding			2.2108	2.29608	3.57046	0.000965972	0.0109341	-0.767846
AT2G46990	AT2G46990.1	Encodes a member of the Aux/IAA family of proteins implicated in auxin signaling. IAA20 lacks the conserved degron (domain II) found in many family members, and IAA20 fusion proteins are stable in Arabidopsis seedlings. IAA20 transcripts are induced by auxin treatment, and overexpression of IAA20 leads to defects in gravitropism, root development, root meristem maintenance, etiolation, and cotyle…	protein_coding	INDOLE-3-ACETIC ACID INDUCIBLE 20 (IAA20)	INDOLE-3-ACETIC ACID INDUCIBLE 20 (IAA20)	2.21053	0.806633	2.81241	0.00766207	0.0477249	-2.44369
AT3G13061	AT3G13061.1	Potential natural antisense gene, locus overlaps with AT3G13060	other_rna			2.20946	0.145538	3.05839	0.00401165	0.0299547	-1.94686
AT4G13540	AT4G13540.1	unknown protein; INVOLVED IN: N-terminal protein myristoylation; BEST Arabidopsis thaliana protein match is: unknown protein (TAIR:AT3G23930.1); Has 4658 Blast hits to 3455 proteins in 431 species: Archae - 39; Bacteria - 387; Metazoa - 1842; Fungi - 436; Plants - 133; Viruses - 38; Other Eukaryotes - 1783 (source: NCBI BLink).	protein_coding			2.20482	1.03336	4.16966	0.000164554	0.0031439	0.84256
AT5G49520	AT5G49520.1	Encodes WRKY48, a member of the WRKY Transcription Factor. WRKY48 is a stress- and pathogen-induced transcriptional activator that represses plant basal defense.	protein_coding	WRKY DNA-BINDING PROTEIN 48 (WRKY48)	WRKY DNA-BINDING PROTEIN 48 (WRKY48);ARABIDOPSIS THALIANA WRKY DNA-BINDING PROTEIN 48 (ATWRKY48)	2.20162	2.78074	3.05774	0.00401861	0.029996	-1.97472
AT3G46620	AT3G46620.1	Encodes an ABA- and drought-induced RING-DUF1117 gene whose mutation results in hyposensitive phenotypes toward ABA in terms of germination rate and stomatal closure and markedly reduced tolerance to drought stress relative to wild-type plants.	protein_coding	RING AND DOMAIN OF UNKNOWN FUNCTION 1117 1 (RDUF1)	RING AND DOMAIN OF UNKNOWN FUNCTION 1117 1 (RDUF1);ARABIDOPSIS THALIANA RING AND DOMAIN OF UNKNOWN FUNCTION 1117 1 (ATRDUF1)	2.20139	5.44969	6.50377	1.04e-07	1.5e-05	7.66106
AT3G14060	AT3G14060.1	unknown protein; BEST Arabidopsis thaliana protein match is: unknown protein (TAIR:AT1G54120.1); Has 30 Blast hits to 30 proteins in 8 species: Archae - 0; Bacteria - 0; Metazoa - 0; Fungi - 0; Plants - 30; Viruses - 0; Other Eukaryotes - 0 (source: NCBI BLink).	protein_coding			2.19665	-0.449068	3.10575	0.00353126	0.0272195	-1.82272
AT2G36770	AT2G36770.1	UDP-Glycosyltransferase superfamily protein; FUNCTIONS IN: transferase activity, transferring hexosyl groups, UDP-glycosyltransferase activity, transferase activity, transferring glycosyl groups; INVOLVED IN: metabolic process; LOCATED IN: cellular_component unknown; CONTAINS InterPro DOMAIN/s: UDP-glucuronosyl/UDP-glucosyltransferase (InterPro:IPR002213); BEST Arabidopsis thaliana protein match …	protein_coding			2.18221	0.236254	3.5471	0.00103286	0.0114685	-0.780166
AT2G46410	AT2G46410.1	Nuclear-localized R3-type MYB transcription factor. Positive regulator of hair-cell differentiation. Preferentially transcribed in hairless cells. Moves from atrichoblasts into trichoblast via plasmodesmata in a tissue-specific mode. N-terminus and part of the Myb domain are required for this movement, with W76 playing a crucial role. Capability to increase the size-exclusion limit of plasmodesma…	protein_coding	CAPRICE (CPC)	CAPRICE (CPC)	2.18058	0.202095	3.78417	0.000519549	0.00701946	-0.226622
AT2G05380	AT2G05380.1	glycine-rich protein 3 short isoform (GRP3S) mRNA, complete	protein_coding	GLYCINE-RICH PROTEIN 3 SHORT ISOFORM (GRP3S)	GLYCINE-RICH PROTEIN 3 SHORT ISOFORM (GRP3S)	2.16814	8.86659	5.29746	4.89e-06	0.000257455	3.96077
AT1G32640	AT1G32640.1	Encodes a MYC-related transcriptional activator with a typical DNA binding domain of a basic helix-loop-helix leucine zipper motif. Binds to an extended G-Box promoter motif and interacts with Jasmonate ZIM-domain proteins. Its transcription is induced by dehydration stress and ABA treatment. Negative regulator of blue light?mediated photomorphogenic growth and blue and far-red-light?regulated ge…	protein_coding	(MYC2)	(ZBF1); (MYC2); (ATMYC2);JASMONATE INSENSITIVE 1 (JAI1); (RD22BP1);JASMONATE INSENSITIVE 1 (JIN1)	2.1574	6.2542	8.08898	7.25e-10	4.48e-07	12.4996
AT3G24520	AT3G24520.1	member of Heat Stress Transcription Factor (Hsf) family	protein_coding	HEAT SHOCK TRANSCRIPTION FACTOR C1 (HSFC1)	(AT-HSFC1);HEAT SHOCK TRANSCRIPTION FACTOR C1 (HSFC1)	2.14698	2.56213	5.59855	1.87e-06	0.000123395	4.94462
AT2G28400	AT2G28400.1	Protein of unknown function, DUF584; CONTAINS InterPro DOMAIN/s: Protein of unknown function DUF584 (InterPro:IPR007608); BEST Arabidopsis thaliana protein match is: Protein of unknown function, DUF584 (TAIR:AT3G45210.1); Has 318 Blast hits to 318 proteins in 20 species: Archae - 0; Bacteria - 0; Metazoa - 0; Fungi - 0; Plants - 318; Viruses - 0; Other Eukaryotes - 0 (source: NCBI BLink).	protein_coding			2.14653	3.32729	3.16961	0.00296912	0.0241171	-1.78933
AT1G23710	AT1G23710.1	Protein of unknown function (DUF1645); CONTAINS InterPro DOMAIN/s: Protein of unknown function DUF1645 (InterPro:IPR012442); BEST Arabidopsis thaliana protein match is: Protein of unknown function (DUF1645) (TAIR:AT1G70420.1); Has 288 Blast hits to 282 proteins in 52 species: Archae - 0; Bacteria - 6; Metazoa - 16; Fungi - 11; Plants - 191; Viruses - 0; Other Eukaryotes - 64 (source: NCBI BLink).	protein_coding			2.13651	4.94403	7.77977	1.88e-09	8.05e-07	11.577
AT5G56870	AT5G56870.1	beta-galactosidase 4 (BGAL4); FUNCTIONS IN: beta-galactosidase activity; INVOLVED IN: lactose catabolic process, using glucoside 3-dehydrogenase, carbohydrate metabolic process, lactose catabolic process via UDP-galactose, lactose catabolic process; LOCATED IN: endomembrane system; EXPRESSED IN: 25 plant structures; EXPRESSED DURING: 12 growth stages; CONTAINS InterPro DOMAIN/s: Glycoside hydrola…	protein_coding	BETA-GALACTOSIDASE 4 (BGAL4)	BETA-GALACTOSIDASE 4 (BGAL4)	2.1118	8.53003	5.12523	8.45e-06	0.00037584	3.40648
AT3G06890	AT3G06890.1	unknown protein; Has 91 Blast hits to 91 proteins in 12 species: Archae - 0; Bacteria - 0; Metazoa - 0; Fungi - 0; Plants - 91; Viruses - 0; Other Eukaryotes - 0 (source: NCBI BLink).	protein_coding			2.11055	0.308942	3.24829	0.00239274	0.0208987	-1.49121
AT3G21090	AT3G21090.1	ABC-2 type transporter family protein; FUNCTIONS IN: ATPase activity, coupled to transmembrane movement of substances; INVOLVED IN: response to karrikin; LOCATED IN: membrane; EXPRESSED IN: 7 plant structures; EXPRESSED DURING: 6 growth stages; CONTAINS InterPro DOMAIN/s: ATPase, AAA+ type, core (InterPro:IPR003593), ABC transporter-like (InterPro:IPR003439), ABC-2 type transporter (InterPro:IPR0…	protein_coding	ATP-BINDING CASSETTE G15 (ABCG15)	ATP-BINDING CASSETTE G15 (ABCG15)	2.10408	3.08247	3.82323	0.000463218	0.00646258	-0.154039
AT3G50800	AT3G50800.1	unknown protein; FUNCTIONS IN: molecular_function unknown; INVOLVED IN: N-terminal protein myristoylation; LOCATED IN: cellular_component unknown; BEST Arabidopsis thaliana protein match is: unknown protein (TAIR:AT5G66580.1); Has 249 Blast hits to 249 proteins in 14 species: Archae - 0; Bacteria - 0; Metazoa - 0; Fungi - 0; Plants - 249; Viruses - 0; Other Eukaryotes - 0 (source: NCBI BLink).	protein_coding			2.10274	2.20688	5.00171	1.25e-05	0.000497388	3.17283
AT3G43850	AT3G43850.1	unknown protein; FUNCTIONS IN: molecular_function unknown; INVOLVED IN: biological_process unknown; LOCATED IN: vacuole; BEST Arabidopsis thaliana protein match is: unknown protein (TAIR:AT5G21940.1); Has 215 Blast hits to 215 proteins in 19 species: Archae - 0; Bacteria - 0; Metazoa - 0; Fungi - 0; Plants - 213; Viruses - 0; Other Eukaryotes - 2 (source: NCBI BLink).	protein_coding			2.10239	3.52803	3.35716	0.00176823	0.01692	-1.33519
AT4G27450	AT4G27450.1	Aluminium induced protein with YGL and LRDR motifs; FUNCTIONS IN: molecular_function unknown; INVOLVED IN: biological_process unknown; LOCATED IN: cytosol, nucleus, plasma membrane; EXPRESSED IN: 25 plant structures; EXPRESSED DURING: 14 growth stages; BEST Arabidopsis thaliana protein match is: Aluminium induced protein with YGL and LRDR motifs (TAIR:AT3G15450.1); Has 30201 Blast hits to 17322 p…	protein_coding			2.0911	7.54577	6.68586	5.83e-08	9.79e-06	8.22256
AT3G15440	AT3G15440.1	BEST Arabidopsis thaliana protein match is: RING/U-box superfamily protein (TAIR:AT3G15740.1); Has 12 Blast hits to 12 proteins in 2 species: Archae - 0; Bacteria - 0; Metazoa - 0; Fungi - 0; Plants - 12; Viruses - 0; Other Eukaryotes - 0 (source: NCBI BLink).	protein_coding			2.08945	-0.824163	3.38755	0.00162383	0.0159624	-1.16553
AT4G15720	AT4G15720.1	Tetratricopeptide repeat (TPR)-like superfamily protein; CONTAINS InterPro DOMAIN/s: Pentatricopeptide repeat (InterPro:IPR002885); BEST Arabidopsis thaliana protein match is: mitochondrial editing factor 22 (TAIR:AT3G12770.1); Has 30201 Blast hits to 17322 proteins in 780 species: Archae - 12; Bacteria - 1396; Metazoa - 17338; Fungi - 3422; Plants - 5037; Viruses - 0; Other Eukaryotes - 2996 (so…	protein_coding			2.08519	-1.26529	3.01251	0.00453515	0.032712	-2.02222
AT1G18740	AT1G18740.1	FUNCTIONS IN: molecular_function unknown; INVOLVED IN: biological_process unknown; EXPRESSED IN: 23 plant structures; EXPRESSED DURING: 13 growth stages; CONTAINS InterPro DOMAIN/s: Protein BYPASS related (InterPro:IPR008511); BEST Arabidopsis thaliana protein match is: Protein of unknown function (DUF793) (TAIR:AT1G74450.1); Has 167 Blast hits to 164 proteins in 20 species: Archae - 3; Bacteria …	protein_coding			2.08489	6.07444	7.44016	5.4e-09	1.8e-06	10.5425
AT2G38400	AT2G38400.2	alanine:glyoxylate aminotransferase 2 homolog (AGT3) mRNA,	protein_coding	ALANINE:GLYOXYLATE AMINOTRANSFERASE 3 (AGT3)	ALANINE:GLYOXYLATE AMINOTRANSFERASE 3 (AGT3)	2.07957	7.89405	5.19625	6.75e-06	0.000324138	3.62388
AT1G30190	AT1G30190.1	unknown protein; BEST Arabidopsis thaliana protein match is: unknown protein (TAIR:AT2G34610.1); Has 56 Blast hits to 56 proteins in 13 species: Archae - 0; Bacteria - 0; Metazoa - 0; Fungi - 0; Plants - 44; Viruses - 0; Other Eukaryotes - 12 (source: NCBI BLink).	protein_coding			2.0588	-2.11092	2.96162	0.00519077	0.0360564	-2.13036
AT1G27730	AT1G27730.1	Related to Cys2/His2-type zinc-finger proteins found in higher plants. Compensated for a subset of calcineurin deficiency in yeast. Salt tolerance produced by ZAT10 appeared to be partially dependent on ENA1/PMR2, a P-type ATPase required for Li+ and Na+ efflux in yeast. The protein is localized to the nucleus, acts as a transcriptional repressor and is responsive to chitin oligomers. Also involv…	protein_coding	SALT TOLERANCE ZINC FINGER (STZ)	(ZAT10);SALT TOLERANCE ZINC FINGER (STZ)	2.05771	4.22549	3.79142	0.000508611	0.0069077	-0.55623
AT1G61470	AT1G61470.1	Polynucleotidyl transferase, ribonuclease H-like superfamily protein; FUNCTIONS IN: ribonuclease activity, nucleic acid binding; INVOLVED IN: RNA modification; LOCATED IN: nucleus; CONTAINS InterPro DOMAIN/s: Ribonuclease CAF1 (InterPro:IPR006941), Polynucleotidyl transferase, ribonuclease H fold (InterPro:IPR012337); BEST Arabidopsis thaliana protein match is: Polynucleotidyl transferase, ribonu…	protein_coding			2.05299	0.682438	3.54784	0.00103069	0.0114505	-0.807119
AT4G01950	AT4G01950.1	Encodes a member of a family of proteins with glycerol-3-phosphate acyltransferase activity.	protein_coding	GLYCEROL-3-PHOSPHATE ACYLTRANSFERASE 3 (GPAT3)	GLYCEROL-3-PHOSPHATE ACYLTRANSFERASE 3 (GPAT3); (ATGPAT3)	2.04725	5.36555	5.88313	7.55e-07	6.52e-05	5.75553
AT1G72240	AT1G72240.1	unknown protein; BEST Arabidopsis thaliana protein match is: unknown protein (TAIR:AT1G22470.1); Has 65 Blast hits to 63 proteins in 13 species: Archae - 0; Bacteria - 0; Metazoa - 1; Fungi - 0; Plants - 64; Viruses - 0; Other Eukaryotes - 0 (source: NCBI BLink).	protein_coding			2.04349	-0.5977	2.88626	0.00632673	0.0416154	-2.28987
AT4G26288	AT4G26288.1	FUNCTIONS IN: molecular_function unknown; INVOLVED IN: biological_process unknown; LOCATED IN: cellular_component unknown; BEST Arabidopsis thaliana protein match is: oxidative stress 3 (TAIR:AT5G56550.1); Has 289 Blast hits to 232 proteins in 41 species: Archae - 0; Bacteria - 12; Metazoa - 36; Fungi - 21; Plants - 151; Viruses - 2; Other Eukaryotes - 67 (source: NCBI BLink).	protein_coding			2.03118	2.79821	2.93548	0.00556121	0.0379119	-2.52233
AT1G09420	AT1G09420.2	Encodes a protein similar to glucose-6-phosphate dehydrogenase but, based on amino acid differences in the active site and lack of activity, does not encode a functional G6PDH. The amino acid sequence for the consensus sequence of the G6PDH active site (DHYLGKE) differs in three places in this protein. gc exon splice site at 20574 is based on protein alignment, and is not confirmed experimentally.	protein_coding	GLUCOSE-6-PHOSPHATE DEHYDROGENASE 4 (G6PD4)	GLUCOSE-6-PHOSPHATE DEHYDROGENASE 4 (G6PD4)	2.02407	4.11262	8.9887	4.83e-11	6.76e-08	15.098
AT5G44350	AT5G44350.1	ethylene-responsive nuclear protein -related; BEST Arabidopsis thaliana protein match is: ethylene-responsive nuclear protein / ethylene-regulated nuclear protein (ERT2) (TAIR:AT4G20880.1); Has 50 Blast hits to 50 proteins in 16 species: Archae - 0; Bacteria - 2; Metazoa - 0; Fungi - 0; Plants - 41; Viruses - 0; Other Eukaryotes - 7 (source: NCBI BLink).	protein_coding			2.02362	0.068976	3.5287	0.00108866	0.0119365	-0.88876
AT4G27657	AT4G27657.1	unknown protein; FUNCTIONS IN: molecular_function unknown; INVOLVED IN: biological_process unknown; LOCATED IN: endomembrane system; EXPRESSED IN: 15 plant structures; EXPRESSED DURING: 9 growth stages; BEST Arabidopsis thaliana protein match is: unknown protein (TAIR:AT5G54145.1); Has 30201 Blast hits to 17322 proteins in 780 species: Archae - 12; Bacteria - 1396; Metazoa - 17338; Fungi - 3422; …	protein_coding			2.01131	2.54986	5.72388	1.26e-06	9.29e-05	5.31752
AT5G02020	AT5G02020.1	Encodes a protein involved in salt tolerance, names SIS (Salt Induced Serine rich).	protein_coding	SALT INDUCED SERINE RICH (SIS)	SALT INDUCED SERINE RICH (SIS)	1.99933	5.41176	3.61917	0.000839674	0.00992157	-0.737446
AT3G28340	AT3G28340.1	Encodes a protein with putative galacturonosyltransferase activity.	protein_coding	GALACTURONOSYLTRANSFERASE-LIKE 10 (GATL10)	GALACTURONOSYLTRANSFERASE-LIKE 10 (GATL10);GALACTINOL SYNTHASE 8 (GolS8)	1.99678	3.62833	4.4186	7.7e-05	0.00183834	1.46124
AT1G62480	AT1G62480.1	Vacuolar calcium-binding protein-related; INVOLVED IN: response to cadmium ion, response to salt stress; LOCATED IN: cellular_component unknown; EXPRESSED IN: 23 plant structures; EXPRESSED DURING: 13 growth stages; Has 21787 Blast hits to 9668 proteins in 1087 species: Archae - 111; Bacteria - 3941; Metazoa - 6730; Fungi - 2179; Plants - 741; Viruses - 179; Other Eukaryotes - 7906 (source: NCBI …	protein_coding			1.99651	8.05024	5.16214	7.52e-06	0.00034917	3.55155
AT3G55980	AT3G55980.1	salt-inducible zinc finger 1 (SZF1); CONTAINS InterPro DOMAIN/s: Zinc finger, CCCH-type (InterPro:IPR000571), Ankyrin repeat-containing domain (InterPro:IPR020683), Ankyrin repeat (InterPro:IPR002110); BEST Arabidopsis thaliana protein match is: zinc finger (CCCH-type) family protein (TAIR:AT2G40140.2); Has 1623 Blast hits to 1414 proteins in 181 species: Archae - 2; Bacteria - 49; Metazoa - 777;…	protein_coding	SALT-INDUCIBLE ZINC FINGER 1 (SZF1)	(ATSZF1);SALT-INDUCIBLE ZINC FINGER 1 (SZF1)	1.99512	5.9997	4.85538	1.98e-05	0.000694691	2.57191
AT5G57655	AT5G57655.2	xylose isomerase family protein; FUNCTIONS IN: xylose isomerase activity; INVOLVED IN: carbohydrate metabolic process; LOCATED IN: endoplasmic reticulum, plasma membrane, vacuole; EXPRESSED IN: 25 plant structures; EXPRESSED DURING: 14 growth stages; CONTAINS InterPro DOMAIN/s: Xylose isomerase-like, TIM barrel domain (InterPro:IPR013022), Xylose isomerase, bacterial type (InterPro:IPR013452), Xy…	protein_coding			1.99261	8.43219	5.74358	1.18e-06	8.9e-05	5.35112
AT1G03090	AT1G03090.2	MCCA is the biotinylated subunit of the dimer MCCase, which is involved in leucine degradation. Both subunits are nuclear coded and the active enzyme is located in the mitochondrion.	protein_coding	(MCCA)	(MCCA)	1.99133	7.76086	4.1833	0.000157893	0.00303596	0.643702
AT1G76600	AT1G76600.1	unknown protein; FUNCTIONS IN: molecular_function unknown; INVOLVED IN: N-terminal protein myristoylation; LOCATED IN: nucleolus, nucleus; EXPRESSED IN: 24 plant structures; EXPRESSED DURING: 15 growth stages; BEST Arabidopsis thaliana protein match is: unknown protein (TAIR:AT1G21010.1); Has 220 Blast hits to 220 proteins in 14 species: Archae - 0; Bacteria - 0; Metazoa - 0; Fungi - 0; Plants - …	protein_coding			1.98916	5.03843	5.21063	6.45e-06	0.00031255	3.65037
AT5G44572	AT5G44572.1	unknown protein; FUNCTIONS IN: molecular_function unknown; INVOLVED IN: biological_process unknown; LOCATED IN: endomembrane system; Has 7 Blast hits to 7 proteins in 2 species: Archae - 0; Bacteria - 0; Metazoa - 0; Fungi - 0; Plants - 7; Viruses - 0; Other Eukaryotes - 0 (source: NCBI BLink).	protein_coding			1.98809	1.05472	6.03981	4.58e-07	4.35e-05	6.30289
AT3G50060	AT3G50060.1	Encodes a member of the R2R3 transcription factor gene family. Expressed in response to potassium deprivation and auxin. Involved in lateral root development. Interacts with ARF7 and regulates the expression of some auxin responsive genes.	protein_coding	MYB DOMAIN PROTEIN 77 (MYB77)	MYB DOMAIN PROTEIN 77 (MYB77)	1.9831	2.91655	5.07793	9.81e-06	0.000418487	3.30103
AT4G20860	AT4G20860.1	FAD-binding Berberine family protein; FUNCTIONS IN: electron carrier activity, oxidoreductase activity, FAD binding, catalytic activity; INVOLVED IN: response to cyclopentenone; LOCATED IN: endomembrane system; EXPRESSED IN: 10 plant structures; EXPRESSED DURING: LP.06 six leaves visible, LP.04 four leaves visible, 4 anthesis, LP.10 ten leaves visible, LP.08 eight leaves visible; CONTAINS InterPr…	protein_coding			1.97865	3.75457	3.20202	0.00271734	0.0227598	-1.67063
AT1G14870	AT1G14870.1	PCR2 encodes a membrane protein involved in zinc transport and detoxification.	protein_coding	PLANT CADMIUM RESISTANCE 2 (PCR2)	PLANT CADMIUM RESISTANCE 2 (PCR2); (AtPCR2)	1.97357	4.2485	3.80407	0.000490063	0.00670786	-0.265697
AT1G25400	AT1G25400.1	unknown protein; BEST Arabidopsis thaliana protein match is: unknown protein (TAIR:AT1G68440.1); Has 21 Blast hits to 21 proteins in 6 species: Archae - 0; Bacteria - 0; Metazoa - 0; Fungi - 0; Plants - 21; Viruses - 0; Other Eukaryotes - 0 (source: NCBI BLink).	protein_coding			1.96648	4.79488	5.18221	7.05e-06	0.000333551	3.55361
AT1G07135	AT1G07135.1	glycine-rich protein; Has 22251 Blast hits to 8348 proteins in 789 species: Archae - 21; Bacteria - 7328; Metazoa - 6126; Fungi - 1280; Plants - 3980; Viruses - 524; Other Eukaryotes - 2992 (source: NCBI BLink).	protein_coding			1.95439	4.83944	3.6897	0.000684572	0.00857635	-0.830478
AT5G46590	AT5G46590.1	NAC domain containing protein 96 (NAC096); FUNCTIONS IN: sequence-specific DNA binding transcription factor activity; INVOLVED IN: multicellular organismal development, regulation of transcription; LOCATED IN: cellular_component unknown; EXPRESSED IN: 9 plant structures; EXPRESSED DURING: 6 growth stages; CONTAINS InterPro DOMAIN/s: No apical meristem (NAM) protein (InterPro:IPR003441); BEST Arab…	protein_coding	NAC DOMAIN CONTAINING PROTEIN 96 (NAC096)	NAC DOMAIN CONTAINING PROTEIN 96 (NAC096);NAC DOMAIN CONTAINING PROTEIN 96 (anac096)	1.94223	0.807554	3.66302	0.000739667	0.00906642	-0.498236
AT3G62260	AT3G62260.2	Protein phosphatase 2C family protein; FUNCTIONS IN: protein serine/threonine phosphatase activity, catalytic activity; INVOLVED IN: protein amino acid dephosphorylation; LOCATED IN: protein serine/threonine phosphatase complex; EXPRESSED IN: 22 plant structures; EXPRESSED DURING: 12 growth stages; CONTAINS InterPro DOMAIN/s: Protein phosphatase 2C, manganese/magnesium aspartate binding site (Int…	protein_coding			1.93447	3.82203	4.09139	0.000208417	0.00366695	0.571269
AT4G27652	AT4G27652.1	unknown protein; BEST Arabidopsis thaliana protein match is: unknown protein (TAIR:AT4G27657.1); Has 30201 Blast hits to 17322 proteins in 780 species: Archae - 12; Bacteria - 1396; Metazoa - 17338; Fungi - 3422; Plants - 5037; Viruses - 0; Other Eukaryotes - 2996 (source: NCBI BLink).	protein_coding			1.93224	3.24699	5.12779	8.38e-06	0.000375196	3.49606
AT5G26920	AT5G26920.1	Encodes a calmodulin-binding protein CBP60g (calmodulin binding protein 60-like.g). The calmodulin-binding domain is located near the N-terminus; calmodulin binding is dependent on Ca(2+). Inducible by both bacterial pathogen and MAMP (microbe-associated molecular pattern) treatments. Bacterial growth is enhanced in cbp60g mutants. cbp60g mutants also show defects in salicylic acid (SA) accumulat…	protein_coding	CAM-BINDING PROTEIN 60-LIKE G (CBP60G)	CAM-BINDING PROTEIN 60-LIKE G (CBP60G)	1.93127	3.55362	4.01556	0.000261696	0.0042464	0.182576
AT1G05835	AT1G05835.1	PHD finger protein; LOCATED IN: endomembrane system; BEST Arabidopsis thaliana protein match is: unknown protein (TAIR:AT1G32583.1); Has 93 Blast hits to 91 proteins in 14 species: Archae - 0; Bacteria - 0; Metazoa - 0; Fungi - 0; Plants - 93; Viruses - 0; Other Eukaryotes - 0 (source: NCBI BLink).	protein_coding			1.93115	2.67118	4.6963	3.26e-05	0.00100214	2.26749
AT3G06850	AT3G06850.1	dihydrolipoamide branched chain acyltransferase	protein_coding	(BCE2)	DARK INDUCIBLE 3 (DIN3); (BCE2); (LTA1)	1.92809	6.72384	4.84587	2.04e-05	0.000709438	2.54662
AT1G31040	AT1G31040.1	PLATZ transcription factor family protein; CONTAINS InterPro DOMAIN/s: Protein of unknown function DUF597 (InterPro:IPR006734); BEST Arabidopsis thaliana protein match is: PLATZ transcription factor family protein (TAIR:AT2G12646.1); Has 411 Blast hits to 411 proteins in 26 species: Archae - 0; Bacteria - 0; Metazoa - 0; Fungi - 0; Plants - 411; Viruses - 0; Other Eukaryotes - 0 (source: NCBI BLi…	protein_coding			1.92547	0.606931	3.34282	0.00184055	0.0173924	-1.2725
AT5G36910	AT5G36910.1	Encodes a thionin that is expressed at a low basal level in seedlings and shows circadian variation. Predicted to encode a PR (pathogenesis-related) protein. Belongs to the plant thionin (PR-13) family with the following members: At1g66100, At5g36910, At1g72260, At2g15010, At1g12663, At1g12660.	protein_coding	THIONIN 2.2 (THI2.2)	THIONIN 2.2 (THI2.2)	1.92146	-2.19009	3.55902	0.000998188	0.0111961	-0.750408
AT5G51530	AT5G51530.1	Ubiquitin carboxyl-terminal hydrolase-related protein; FUNCTIONS IN: ubiquitin thiolesterase activity; INVOLVED IN: ubiquitin-dependent protein catabolic process; CONTAINS InterPro DOMAIN/s: Protein of unknown function DUF627 (InterPro:IPR006866), Peptidase C19, ubiquitin carboxyl-terminal hydrolase 2 (InterPro:IPR001394), Protein of unknown function DUF629 (InterPro:IPR006865); BEST Arabidopsis …	protein_coding			1.9163	-1.35013	3.278	0.00220413	0.0196937	-1.4247
AT1G27670	AT1G27670.1	unknown protein; BEST Arabidopsis thaliana protein match is: unknown protein (TAIR:AT1G75360.1); Has 35 Blast hits to 35 proteins in 6 species: Archae - 0; Bacteria - 0; Metazoa - 0; Fungi - 0; Plants - 35; Viruses - 0; Other Eukaryotes - 0 (source: NCBI BLink).	protein_coding			1.89404	2.39979	2.89222	0.00622902	0.0411291	-2.27789
AT1G08320	AT1G08320.1	bZIP transcription factor family protein; FUNCTIONS IN: DNA binding, sequence-specific DNA binding transcription factor activity; INVOLVED IN: regulation of transcription, DNA-dependent; EXPRESSED IN: 9 plant structures; EXPRESSED DURING: 6 growth stages; CONTAINS InterPro DOMAIN/s: Basic-leucine zipper (bZIP) transcription factor (InterPro:IPR004827), bZIP transcription factor, bZIP-1 (InterPro:…	protein_coding	TGACG (TGA) MOTIF-BINDING PROTEIN 9 (TGA9)	TGACG (TGA) MOTIF-BINDING PROTEIN 9 (TGA9); (bZIP21)	1.89172	1.67843	3.24954	0.00238451	0.0208355	-1.52776
AT4G37730	AT4G37730.1	basic leucine-zipper 7 (bZIP7); FUNCTIONS IN: DNA binding, sequence-specific DNA binding transcription factor activity; INVOLVED IN: regulation of transcription, DNA-dependent; EXPRESSED IN: 19 plant structures; EXPRESSED DURING: 7 growth stages; CONTAINS InterPro DOMAIN/s: Basic-leucine zipper (bZIP) transcription factor (InterPro:IPR004827), bZIP transcription factor, bZIP-1 (InterPro:IPR011616…	protein_coding	BASIC LEUCINE-ZIPPER 7 (bZIP7)	BASIC LEUCINE-ZIPPER 7 (bZIP7);BASIC LEUCINE-ZIPPER 7 (AtbZIP7)	1.87935	0.420273	4.8379	2.09e-05	0.000724178	2.67345
AT4G27590	AT4G27590.2	Heavy metal transport/detoxification superfamily protein ; FUNCTIONS IN: copper ion binding, metal ion binding; INVOLVED IN: copper ion transport, metal ion transport; LOCATED IN: cellular_component unknown; EXPRESSED IN: 8 plant structures; EXPRESSED DURING: 6 growth stages; CONTAINS InterPro DOMAIN/s: Heavy metal transport/detoxification protein (InterPro:IPR006121); BEST Arabidopsis thaliana p…	protein_coding			1.84932	-0.982535	3.00314	0.00464972	0.0333436	-2.05588
AT3G23170	AT3G23170.1	unknown protein; BEST Arabidopsis thaliana protein match is: unknown protein (TAIR:AT4G14450.1); Has 74 Blast hits to 74 proteins in 6 species: Archae - 0; Bacteria - 0; Metazoa - 0; Fungi - 0; Plants - 74; Viruses - 0; Other Eukaryotes - 0 (source: NCBI BLink).	protein_coding			1.84439	3.41947	5.62097	1.75e-06	0.000117072	5.02235
AT2G02930	AT2G02930.1	Encodes glutathione transferase belonging to the phi class of GSTs. Naming convention according to Wagner et al. (2002).	protein_coding	GLUTATHIONE S-TRANSFERASE F3 (GSTF3)	GLUTATHIONE S-TRANSFERASE F3 (GSTF3);GLUTATHIONE S-TRANSFERASE 16 (GST16);GLUTATHIONE S-TRANSFERASE F3 (ATGSTF3)	1.84297	2.26936	3.19849	0.00274372	0.022852	-1.89342
AT3G44260	AT3G44260.1	Encodes one of the homologs of the yeast CCR4-associated factor 1: AT3G44260 (CAF1a), AT5G22250 (CAF1b). Has mRNA deadenylation activity. Also plays a role in plant defense responses.	protein_coding	CCR4- ASSOCIATED FACTOR 1A (CAF1a)	CCR4- ASSOCIATED FACTOR 1A (CAF1a);CCR4- ASSOCIATED FACTOR 1A (AtCAF1a)	1.84186	5.32794	4.63436	3.95e-05	0.00114708	1.90059
AT5G37770	AT5G37770.1	Encodes a protein with 40% similarity to calmodulin. Binds Ca(2+) and, as a consequence, undergoes conformational changes. CML24 expression occurs in all major organs, and transcript levels are increased from 2- to 15-fold in plants subjected to touch, darkness, heat, cold, hydrogen peroxide, abscisic acid (ABA), and indole-3-acetic acid. However, CML24 protein accumulation changes were not detec…	protein_coding	TOUCH 2 (TCH2)	TOUCH 2 (TCH2);CALMODULIN-LIKE 24 (CML24)	1.83975	5.41739	5.81399	9.42e-07	7.61e-05	5.50873
AT2G24100	AT2G24100.1	unknown protein; BEST Arabidopsis thaliana protein match is: unknown protein (TAIR:AT4G30780.1); Has 101 Blast hits to 101 proteins in 16 species: Archae - 0; Bacteria - 0; Metazoa - 0; Fungi - 0; Plants - 95; Viruses - 0; Other Eukaryotes - 6 (source: NCBI BLink).	protein_coding	ALTERED SEED GERMINATION 1 (ASG1)	ALTERED SEED GERMINATION 1 (ASG1)	1.83955	4.16599	5.95486	6e-07	5.43e-05	6.0294
AT3G16860	AT3G16860.1	COBRA-like protein 8 precursor (COBL8); CONTAINS InterPro DOMAIN/s: Glycosyl-phosphatidyl inositol-anchored, plant (InterPro:IPR006918); BEST Arabidopsis thaliana protein match is: COBRA-like protein-7 precursor (TAIR:AT4G16120.1); Has 377 Blast hits to 368 proteins in 29 species: Archae - 0; Bacteria - 0; Metazoa - 0; Fungi - 0; Plants - 377; Viruses - 0; Other Eukaryotes - 0 (source: NCBI BLink…	protein_coding	COBRA-LIKE PROTEIN 8 PRECURSOR (COBL8)	COBRA-LIKE PROTEIN 8 PRECURSOR (COBL8)	1.83044	2.25004	2.95965	0.00521791	0.0361586	-2.29268
AT1G64660	AT1G64660.1	Encodes a functional methionine gamma-lyase, a cytosolic enzyme catalyzes the degradation of methionine into methanethiol, alpha-ketobutyrate and ammonia. The catabolism of excess methionine is important to methionine homeostasis.	protein_coding	METHIONINE GAMMA-LYASE (MGL)	METHIONINE GAMMA-LYASE (MGL);METHIONINE GAMMA-LYASE (ATMGL)	1.82335	6.05858	5.38913	3.65e-06	0.000202486	4.2138
AT1G06570	AT1G06570.1	Mutation of the PDS1 locus disrupts the activity of p-hydroxyphenylpyruvate dioxygenase (HPPDase), the first committed step in the synthesis of both plastoquinone and tocopherols in plants.	protein_coding	PHYTOENE DESATURATION 1 (PDS1)	4-HYDROXYPHENYLPYRUVATE DIOXYGENASE (HPPD);PHYTOENE DESATURATION 1 (PDS1);4-HYDROXYPHENYLPYRUVATE DIOXYGENASE (HPD)	1.8215	6.81744	4.47136	6.54e-05	0.00164686	1.40259
AT5G44585	AT5G44585.1	unknown protein; FUNCTIONS IN: molecular_function unknown; INVOLVED IN: biological_process unknown; LOCATED IN: endomembrane system; Has 30201 Blast hits to 17322 proteins in 780 species: Archae - 12; Bacteria - 1396; Metazoa - 17338; Fungi - 3422; Plants - 5037; Viruses - 0; Other Eukaryotes - 2996 (source: NCBI BLink).	protein_coding			1.81428	1.1356	4.39109	8.38e-05	0.00193051	1.38918
AT4G37610	AT4G37610.1	BTB and TAZ domain protein. Located in cytoplasm and expressed in fruit, flower and leaves.	protein_coding	BTB AND TAZ DOMAIN PROTEIN 5 (bt5)	BTB AND TAZ DOMAIN PROTEIN 5 (bt5)	1.81238	5.79553	4.08308	0.000213696	0.00372673	0.280925
AT3G14990	AT3G14990.1	Encodes a homolog of animal DJ-1 superfamily protein. In the A. thaliana genome, three genes encoding close homologs of human DJ-1 were identified AT3G14990 (DJ1A), AT1G53280 (DJ1B) and AT4G34020 (DJ1C). Among the three homologs, DJ1C is essential for chloroplast development and viability.	protein_coding	DJ-1 HOMOLOG A (DJ1A)	DJ-1 HOMOLOG A (DJ1A);DJ-1 HOMOLOG A (AtDJ1A)	1.80607	8.57214	7.58579	3.43e-09	1.33e-06	10.9953
AT1G56660	AT1G56660.1	unknown protein; Has 665200 Blast hits to 205811 proteins in 4684 species: Archae - 3320; Bacteria - 107592; Metazoa - 249086; Fungi - 76753; Plants - 38542; Viruses - 3008; Other Eukaryotes - 186899 (source: NCBI BLink).	protein_coding			1.80246	4.05054	3.24374	0.00242295	0.0210487	-2.02581
AT2G31020	AT2G31020.1	OSBP(oxysterol binding protein)-related protein 1A (ORP1A); FUNCTIONS IN: oxysterol binding; INVOLVED IN: steroid metabolic process; CONTAINS InterPro DOMAIN/s: Pleckstrin homology-type (InterPro:IPR011993), Oxysterol-binding protein (InterPro:IPR000648), Pleckstrin homology (InterPro:IPR001849); BEST Arabidopsis thaliana protein match is: OSBP(oxysterol binding protein)-related protein 1C (TAIR:…	protein_coding	OSBP(OXYSTEROL BINDING PROTEIN)-RELATED PROTEIN 1A (ORP1A)	OSBP(OXYSTEROL BINDING PROTEIN)-RELATED PROTEIN 1A (ORP1A)	1.80152	1.45357	3.16577	0.00300032	0.0242847	-1.68088
AT3G04640	AT3G04640.1	glycine-rich protein; Has 42937 Blast hits to 13549 proteins in 1124 species: Archae - 42; Bacteria - 16604; Metazoa - 12821; Fungi - 2296; Plants - 5249; Viruses - 609; Other Eukaryotes - 5316 (source: NCBI BLink).	protein_coding			1.79779	3.70852	4.11231	0.000195688	0.00352471	0.448617
AT1G28370	AT1G28370.1	encodes a member of the ERF (ethylene response factor) subfamily B-1 of ERF/AP2 transcription factor family. The protein contains one AP2 domain. There are 15 members in this subfamily including ATERF-3, ATERF-4, ATERF-7, and leafy petiole.	protein_coding	ERF DOMAIN PROTEIN 11 (ERF11)	ERF DOMAIN PROTEIN 11 (ERF11);ERF DOMAIN PROTEIN 11 (ATERF11)	1.79716	1.62129	3.03568	0.00426318	0.0312265	-2.18755
AT1G35210	AT1G35210.1	unknown protein; FUNCTIONS IN: molecular_function unknown; INVOLVED IN: biological_process unknown; LOCATED IN: chloroplast; EXPRESSED IN: 14 plant structures; EXPRESSED DURING: 9 growth stages; CONTAINS InterPro DOMAIN/s: Protein of unknown function DUF740 (InterPro:IPR008004); BEST Arabidopsis thaliana protein match is: unknown protein (TAIR:AT1G22470.1); Has 83 Blast hits to 83 proteins in 12 …	protein_coding			1.79198	1.07444	3.16449	0.00301086	0.0243337	-1.87096
AT5G22250	AT5G22250.1	Encodes one of the homologs of the yeast CCR4-associated factor 1: AT3G44260 (CAF1a), AT5G22250 (CAF1b). Has mRNA deadenylation activity. Also plays a role in plant defense responses.	protein_coding	CCR4- ASSOCIATED FACTOR 1B (CAF1b)	CCR4- ASSOCIATED FACTOR 1B (AtCAF1b);CCR4- ASSOCIATED FACTOR 1B (CAF1b)	1.78706	2.91435	4.43582	7.3e-05	0.0017758	1.44117
AT5G62020	AT5G62020.1	member of Heat Stress Transcription Factor (Hsf) family	protein_coding	HEAT SHOCK TRANSCRIPTION FACTOR B2A (HSFB2A)	HEAT SHOCK TRANSCRIPTION FACTOR B2A (HSFB2A);ARABIDOPSIS THALIANA HEAT SHOCK TRANSCRIPTION FACTOR B2A (AT-HSFB2A)	1.77954	3.78885	5.16537	7.44e-06	0.000346384	3.67475
AT3G56880	AT3G56880.1	VQ motif-containing protein; CONTAINS InterPro DOMAIN/s: VQ (InterPro:IPR008889); BEST Arabidopsis thaliana protein match is: calmodulin (CAM)-binding protein of 25 kDa (TAIR:AT2G41010.1); Has 109 Blast hits to 109 proteins in 12 species: Archae - 0; Bacteria - 0; Metazoa - 0; Fungi - 3; Plants - 106; Viruses - 0; Other Eukaryotes - 0 (source: NCBI BLink).	protein_coding			1.7787	6.28156	6.32745	1.83e-07	2.19e-05	7.11857
AT3G16120	AT3G16120.1	Dynein light chain type 1 family protein; FUNCTIONS IN: microtubule motor activity; INVOLVED IN: microtubule-based process; LOCATED IN: microtubule associated complex; EXPRESSED IN: 12 plant structures; EXPRESSED DURING: 6 growth stages; CONTAINS InterPro DOMAIN/s: Dynein light chain, type 1/2 (InterPro:IPR001372); BEST Arabidopsis thaliana protein match is: RHO guanyl-nucleotide exchange factor …	protein_coding			1.77754	0.31016	3.85235	0.000425103	0.00610013	-0.0163848
AT1G23010	AT1G23010.1	Encodes a protein with multicopper oxidase activity. Located in ER. Function together with LPR2 (AT1G71040) and a P5-type ATPase (At5g23630/PDR2) in a common pathway that adjusts root meristem activity to Pi (inorganic phosphate) availability.	protein_coding	LOW PHOSPHATE ROOT1 (LPR1)	LOW PHOSPHATE ROOT1 (LPR1)	1.77002	0.754791	3.22204	0.00257204	0.0219589	-1.55824
AT1G72950	AT1G72950.1	Disease resistance protein (TIR-NBS class); FUNCTIONS IN: transmembrane receptor activity, ATP binding; INVOLVED IN: signal transduction, apoptosis, defense response, innate immune response; LOCATED IN: intrinsic to membrane; EXPRESSED IN: stem, root; CONTAINS InterPro DOMAIN/s: NB-ARC (InterPro:IPR002182), Disease resistance protein (InterPro:IPR000767), Toll-Interleukin receptor (InterPro:IPR00…	protein_coding			1.7699	0.123331	2.89578	0.0061714	0.0409031	-2.29343
AT5G64310	AT5G64310.1	Encodes arabinogalactan-protein (AGP1).	protein_coding	ARABINOGALACTAN PROTEIN 1 (AGP1)	(ATAGP1);ARABINOGALACTAN PROTEIN 1 (AGP1)	1.76613	4.63112	5.6813	1.44e-06	0.000101756	5.11865
AT1G72920	AT1G72920.1	Toll-Interleukin-Resistance (TIR) domain family protein; FUNCTIONS IN: transmembrane receptor activity; INVOLVED IN: response to wounding, defense response; LOCATED IN: intrinsic to membrane; EXPRESSED IN: 19 plant structures; EXPRESSED DURING: 10 growth stages; CONTAINS InterPro DOMAIN/s: Toll-Interleukin receptor (InterPro:IPR000157); BEST Arabidopsis thaliana protein match is: Toll-Interleukin…	protein_coding			1.76564	0.869266	3.62699	0.000820935	0.00977152	-0.857054
AT5G61600	AT5G61600.1	encodes a member of the ERF (ethylene response factor) subfamily B-3 of ERF/AP2 transcription factor family. The protein contains one AP2 domain. There are 18 members in this subfamily including ATERF-1, ATERF-2, AND ATERF-5.	protein_coding	ETHYLENE RESPONSE FACTOR 104 (ERF104)	ETHYLENE RESPONSE FACTOR 104 (ERF104)	1.75371	5.11589	4.40988	7.91e-05	0.00187339	1.22705
AT4G02520	AT4G02520.1	Encodes glutathione transferase belonging to the phi class of GSTs. Naming convention according to Wagner et al. (2002). The expression of this gene is upregulated by herbicide safeners such as benoxacor and fenclorim.	protein_coding	GLUTATHIONE S-TRANSFERASE PHI 2 (GSTF2)	GLUTATHIONE S-TRANSFERASE PHI 2 (GSTF2); (GST2);GLUTATHIONE S-TRANSFERASE PHI 2 (ATGSTF2); (ATPM24.1); (ATPM24)	1.74977	6.50409	3.48282	0.00124066	0.0131566	-1.35037
AT5G06320	AT5G06320.1	encodes a protein whose sequence is similar to tobacco hairpin-induced gene (HIN1) and Arabidopsis non-race specific disease resistance gene (NDR1). Expression of this gene is induced by cucumber mosaic virus, spermine and Pseudomonas syringae pv. tomato DC3000. The gene product is localized to the plasma membrane.	protein_coding	NDR1/HIN1-LIKE 3 (NHL3)	NDR1/HIN1-LIKE 3 (NHL3)	1.74055	6.37496	6.67416	6.05e-08	1e-05	8.19269
AT5G19230	AT5G19230.1	Glycoprotein membrane precursor GPI-anchored; FUNCTIONS IN: molecular_function unknown; INVOLVED IN: biological_process unknown; LOCATED IN: anchored to plasma membrane, plasma membrane, anchored to membrane; EXPRESSED IN: callus; BEST Arabidopsis thaliana protein match is: Glycoprotein membrane precursor GPI-anchored (TAIR:AT5G19240.1); Has 1807 Blast hits to 1807 proteins in 277 species: Archae…	protein_coding			1.73321	4.67034	3.49931	0.00118384	0.0126628	-1.16586
AT4G15258	AT4G15258.1	Encodes a C/D box snoRNA (snoR37-2). Gb: AJ505638	small_nucleolar_rna	SMALL NUCLEOLAR RNA37-2 (SNOR37-2)	SMALL NUCLEOLAR RNA37-2 (SNOR37-2)	1.73014	-0.150083	2.99643	0.00473346	0.0337482	-2.05705
AT2G46270	AT2G46270.1	encodes a bZIP G-box binding protein whose expression is induced by ABA. It has been shown to bind to Adh that contains the G-box and is induced by cold and water deprivation. GBF3 has been shown to be expressed mostly in the root and dark-grown leaves. GBF3 can act as homodimers and as heterodimers with GFB1, GBF2 and GBF4. In addition, GBF3!?s DNA binding activity is enhanced by GIP1, GPRI1 and…	protein_coding	G-BOX BINDING FACTOR 3 (GBF3)	G-BOX BINDING FACTOR 3 (GBF3)	1.72928	4.1208	3.54659	0.00103439	0.0114794	-0.854497
AT5G54080	AT5G54080.1	homogentisate 1,2-dioxygenase	protein_coding	"HOMOGENTISATE 1,2-DIOXYGENASE" (HGO)	"HOMOGENTISATE 1,2-DIOXYGENASE" (HGO)	1.72573	6.67015	6.29276	2.04e-07	2.34e-05	6.99784
AT1G54740	AT1G54740.1	Protein of unknown function (DUF3049); CONTAINS InterPro DOMAIN/s: Protein of unknown function DUF3049 (InterPro:IPR021410); BEST Arabidopsis thaliana protein match is: Protein of unknown function (DUF3049) (TAIR:AT5G22390.1); Has 534 Blast hits to 376 proteins in 66 species: Archae - 0; Bacteria - 26; Metazoa - 75; Fungi - 14; Plants - 157; Viruses - 0; Other Eukaryotes - 262 (source: NCBI BLink…	protein_coding			1.7201	4.64485	2.90841	0.00597079	0.0399136	-2.83653
AT4G38830	AT4G38830.1	Encodes a cysteine-rich receptor-like protein kinase.	protein_coding	CYSTEINE-RICH RLK (RECEPTOR-LIKE PROTEIN KINASE) 26 (CRK26)	CYSTEINE-RICH RLK (RECEPTOR-LIKE PROTEIN KINASE) 26 (CRK26)	1.7073	-0.948925	2.82395	0.00743738	0.0465601	-2.41974
AT5G24800	AT5G24800.1	Encodes bZIP protein BZO2H2.	protein_coding	BASIC LEUCINE ZIPPER 9 (BZIP9)	BASIC LEUCINE ZIPPER 9 (BZIP9);BASIC LEUCINE ZIPPER O2 HOMOLOG 2 (BZO2H2);ARABIDOPSIS THALIANA BASIC LEUCINE ZIPPER 9 (AtbZIP9)	1.70463	5.15139	5.09961	9.16e-06	0.000395024	3.30552
AT3G19030	AT3G19030.1	unknown protein; FUNCTIONS IN: molecular_function unknown; INVOLVED IN: pyridoxine biosynthetic process, homoserine biosynthetic process; LOCATED IN: endomembrane system; EXPRESSED IN: 19 plant structures; EXPRESSED DURING: 9 growth stages; BEST Arabidopsis thaliana protein match is: unknown protein (TAIR:AT1G49500.1); Has 22 Blast hits to 22 proteins in 2 species: Archae - 0; Bacteria - 0; Metaz…	protein_coding			1.69478	4.27401	7.14752	1.35e-08	3.52e-06	9.65363
AT1G09070	AT1G09070.1	SRC2 specifically binds the peptide PIEPPPHH, and moves from ER to a vacuole fraction where it gets internalized. Involved in Protein Storage Vacuole targeting.	protein_coding	SOYBEAN GENE REGULATED BY COLD-2 (SRC2)	SOYBEAN GENE REGULATED BY COLD-2 (SRC2);SOYBEAN GENE REGULATED BY COLD-2 ((AT)SRC2)	1.69398	7.68281	8.40878	2.74e-10	2.7e-07	13.4453
AT2G46400	AT2G46400.1	member of WRKY Transcription Factor; Group III	protein_coding	WRKY DNA-BINDING PROTEIN 46 (WRKY46)	WRKY DNA-BINDING PROTEIN 46 (ATWRKY46);WRKY DNA-BINDING PROTEIN 46 (WRKY46)	1.68559	1.98953	2.88301	0.00638058	0.0417474	-2.60796
AT2G38210	AT2G38210.1	putative PDX1-like protein 4 (PDX1L4); INVOLVED IN: response to ethylene stimulus, pyridoxal phosphate biosynthetic process, response to stress; LOCATED IN: plasma membrane; EXPRESSED IN: ovule, male gametophyte, cultured cell; EXPRESSED DURING: M germinated pollen stage; CONTAINS InterPro DOMAIN/s: Vitamin B6 biosynthesis protein (InterPro:IPR001852); BEST Arabidopsis thaliana protein match is: …	protein_coding	PUTATIVE PDX1-LIKE PROTEIN 4 (PDX1L4)	PUTATIVE PDX1-LIKE PROTEIN 4 (PDX1L4)	1.68255	0.936552	4.74046	2.84e-05	0.000907665	2.4071
AT2G41640	AT2G41640.1	Glycosyltransferase family 61 protein; FUNCTIONS IN: transferase activity, transferring glycosyl groups; INVOLVED IN: biological_process unknown; EXPRESSED IN: 14 plant structures; EXPRESSED DURING: 8 growth stages; CONTAINS InterPro DOMAIN/s: Glycosyltransferase AER61, uncharacterised (InterPro:IPR007657); BEST Arabidopsis thaliana protein match is: Glycosyltransferase family 61 protein (TAIR:AT…	protein_coding			1.68249	5.61891	5.99212	5.33e-07	4.97e-05	6.07283
AT3G45300	AT3G45300.1	Encodes isovaleryl-coenzyme a dehydrogenase. Mutants have increases in 12 seed free amino acids, accumulation of seed homomethionine and 3-isovaleroyloxypropyl-glucosinolate, with a concomitant decrease in seed 3-benzoyloxypropyl-glucosinolate.	protein_coding	ISOVALERYL-COA-DEHYDROGENASE (IVD)	ISOVALERYL-COA-DEHYDROGENASE (IVDH);ISOVALERYL-COA-DEHYDROGENASE (IVD); (ATIVD)	1.68223	7.07251	5.57807	2e-06	0.000127539	4.77251
AT2G40140	AT2G40140.1	CZF1; CONTAINS InterPro DOMAIN/s: Zinc finger, CCCH-type (InterPro:IPR000571), Ankyrin repeat-containing domain (InterPro:IPR020683), Ankyrin repeat (InterPro:IPR002110); BEST Arabidopsis thaliana protein match is: salt-inducible zinc finger 1 (TAIR:AT3G55980.1); Has 1196 Blast hits to 1143 proteins in 183 species: Archae - 4; Bacteria - 47; Metazoa - 401; Fungi - 61; Plants - 441; Viruses - 2; O…	protein_coding	(CZF1)	(ATSZF2); (CZF1); (ZFAR1);(SALT-INDUCIBLE ZINC FINGER 2 (SZF2)	1.68167	6.2991	5.56377	2.09e-06	0.000131166	4.73017
AT4G01870	AT4G01870.1	tolB protein-related; FUNCTIONS IN: molecular_function unknown; INVOLVED IN: response to cyclopentenone; LOCATED IN: membrane; EXPRESSED IN: 22 plant structures; EXPRESSED DURING: 13 growth stages; CONTAINS InterPro DOMAIN/s: WD40-like Beta Propeller (InterPro:IPR011659), Peptidase S9B, dipeptidylpeptidase IV N-terminal (InterPro:IPR002469), Six-bladed beta-propeller, TolB-like (InterPro:IPR01104…	protein_coding			1.67492	5.965	4.21947	0.000141481	0.00279199	0.701982
AT5G13370	AT5G13370.1	Auxin-responsive GH3 family protein; CONTAINS InterPro DOMAIN/s: GH3 auxin-responsive promoter (InterPro:IPR004993); BEST Arabidopsis thaliana protein match is: Auxin-responsive GH3 family protein (TAIR:AT5G13360.3); Has 1602 Blast hits to 1450 proteins in 238 species: Archae - 0; Bacteria - 565; Metazoa - 54; Fungi - 2; Plants - 675; Viruses - 0; Other Eukaryotes - 306 (source: NCBI BLink).	protein_coding			1.66247	4.98587	7.09034	1.62e-08	3.91e-06	9.49029
AT1G21400	AT1G21400.1	Thiamin diphosphate-binding fold (THDP-binding) superfamily protein; FUNCTIONS IN: oxidoreductase activity, acting on the aldehyde or oxo group of donors, disulfide as acceptor, 3-methyl-2-oxobutanoate dehydrogenase (2-methylpropanoyl-transferring) activity; INVOLVED IN: metabolic process; EXPRESSED IN: guard cell; CONTAINS InterPro DOMAIN/s: Dehydrogenase, E1 component (InterPro:IPR001017); BEST…	protein_coding			1.66122	7.15981	3.47054	0.00128469	0.0134739	-1.38887
AT3G62950	AT3G62950.1	Thioredoxin superfamily protein; FUNCTIONS IN: electron carrier activity, protein disulfide oxidoreductase activity; INVOLVED IN: cell redox homeostasis; LOCATED IN: endomembrane system; EXPRESSED IN: 8 plant structures; EXPRESSED DURING: 8 growth stages; CONTAINS InterPro DOMAIN/s: Glutaredoxin-like, plant II (InterPro:IPR011905), Glutaredoxin (InterPro:IPR002109), Thioredoxin fold (InterPro:IPR…	protein_coding			1.64254	1.50941	4.40072	8.13e-05	0.00189479	1.23432
AT5G64120	AT5G64120.1	encodes a cell wall bound peroxidase that is induced by hypo-osmolarity	protein_coding			1.64057	4.15763	3.41211	0.00151544	0.0151162	-1.49869
AT2G37060	AT2G37060.1	"nuclear factor Y, subunit B8" (NF-YB8); FUNCTIONS IN: sequence-specific DNA binding transcription factor activity; INVOLVED IN: regulation of transcription, DNA-dependent; LOCATED IN: nucleus, intracellular; EXPRESSED IN: male gametophyte, pollen tube; EXPRESSED DURING: M germinated pollen stage; CONTAINS InterPro DOMAIN/s: Transcription factor, CBFA/NFYB, DNA topoisomerase (InterPro:IPR003957),…	protein_coding	"NUCLEAR FACTOR Y, SUBUNIT B8" (NF-YB8)	"NUCLEAR FACTOR Y, SUBUNIT B8" (NF-YB8)	1.62827	2.38556	4.98932	1.3e-05	0.000511366	3.16192
AT1G47578	AT1G47578.1	Biotin/lipoate A/B protein ligase family; FUNCTIONS IN: octanoyltransferase activity, catalytic activity; INVOLVED IN: protein modification process, lipoate biosynthetic process; LOCATED IN: cytoplasm; CONTAINS InterPro DOMAIN/s: Octanoyltransferase, conserved site (InterPro:IPR020605), Octanoyltransferase (InterPro:IPR000544), Biotin/lipoate A/B protein ligase (InterPro:IPR004143); BEST Arabidop…	protein_coding			1.62275	0.389069	3.40358	0.00155228	0.0153814	-1.12696
AT2G18193	AT2G18193.1	P-loop containing nucleoside triphosphate hydrolases superfamily protein; FUNCTIONS IN: nucleoside-triphosphatase activity, ATPase activity, nucleotide binding, ATP binding; LOCATED IN: endomembrane system; EXPRESSED IN: callus; CONTAINS InterPro DOMAIN/s: ATPase, AAA-type, core (InterPro:IPR003959), ATPase, AAA+ type, core (InterPro:IPR003593), ATPase, AAA-type, conserved site (InterPro:IPR00396…	protein_coding			1.61586	3.06034	3.31815	0.0019716	0.018269	-1.35303
AT2G15880	AT2G15880.1	Leucine-rich repeat (LRR) family protein; FUNCTIONS IN: structural constituent of cell wall; LOCATED IN: endomembrane system; EXPRESSED IN: 15 plant structures; EXPRESSED DURING: 8 growth stages; CONTAINS InterPro DOMAIN/s: Leucine-rich repeat (InterPro:IPR001611); BEST Arabidopsis thaliana protein match is: Leucine-rich repeat (LRR) family protein (TAIR:AT4G33970.1); Has 436796 Blast hits to 106…	protein_coding			1.61488	6.31259	3.96017	0.000308765	0.00482735	-0.0869105
AT1G22190	AT1G22190.1	The gene encodes a putative transcription factor belongings to the abiotic stress-associated DREB A-6 clade.	protein_coding		OAS HIGH ACCUMULATION 1 (OSH1);RELATED TO AP2 4 (RAP2.4)	1.6147	5.77185	6.26751	2.21e-07	2.5e-05	6.92453
AT3G13450	AT3G13450.1	branched chain alpha-keto acid dehydrogenase E1 beta	protein_coding	DARK INDUCIBLE 4 (DIN4)	DARK INDUCIBLE 4 (DIN4)	1.61097	6.54732	4.56087	4.96e-05	0.001366	1.69806
AT3G13175	AT3G13175.1	unknown protein; FUNCTIONS IN: molecular_function unknown; INVOLVED IN: biological_process unknown; LOCATED IN: endomembrane system; EXPRESSED IN: 18 plant structures; EXPRESSED DURING: 12 growth stages; BEST Arabidopsis thaliana protein match is: unknown protein (TAIR:AT4G16400.1); Has 29 Blast hits to 29 proteins in 8 species: Archae - 0; Bacteria - 0; Metazoa - 0; Fungi - 0; Plants - 29; Virus…	protein_coding			1.60946	0.612248	3.84575	0.000433471	0.0061689	-0.0749049
AT2G43400	AT2G43400.1	Encodes a unique electron-transfer flavoprotein:ubiquinone oxidoreductase that is localized to the mitochondrion. Mutants are more sensitive to sugar starvation when plants are kept in the dark for long periods.	protein_coding	ELECTRON-TRANSFER FLAVOPROTEIN:UBIQUINONE OXIDOREDUCTASE (ETFQO)	ELECTRON-TRANSFER FLAVOPROTEIN:UBIQUINONE OXIDOREDUCTASE (ETFQO)	1.60725	5.93655	5.45665	2.95e-06	0.000170759	4.41511
AT1G22490	AT1G22490.1	basic helix-loop-helix (bHLH) DNA-binding superfamily protein; FUNCTIONS IN: DNA binding, sequence-specific DNA binding transcription factor activity; INVOLVED IN: regulation of transcription; LOCATED IN: nucleus; EXPRESSED IN: 17 plant structures; EXPRESSED DURING: 8 growth stages; CONTAINS InterPro DOMAIN/s: Helix-loop-helix DNA-binding domain (InterPro:IPR001092), Helix-loop-helix DNA-binding …	protein_coding			1.60455	1.38215	6.59136	7.87e-08	1.2e-05	7.98021
AT3G16950	AT3G16950.2	encodes a plastid lipoamide dehydrogenase, subunit of the pyruvate dehydrogenase complex which provides acetyl-CoA for de novo fatty acid biosynthesis. The gene is highly expressed in developing seeds.	protein_coding	LIPOAMIDE DEHYDROGENASE 1 (LPD1)	(ptlpd1);LIPOAMIDE DEHYDROGENASE 1 (LPD1)	1.60226	5.39955	8.07689	7.53e-10	4.52e-07	12.4634
AT5G55700	AT5G55700.1	In vitro assay indicates no beta-amylase activity of BAM4. However mutation in BAM4 impairs starch breakdown. BAM4 may play a regulatory role.	protein_coding	BETA-AMYLASE 4 (BAM4)	BETA-AMYLASE 6 (BMY6);BETA-AMYLASE 4 (BAM4)	1.60217	5.77434	7.93164	1.18e-09	5.74e-07	12.0304
AT3G12830	AT3G12830.1	SAUR-like auxin-responsive protein family ; CONTAINS InterPro DOMAIN/s: Auxin responsive SAUR protein (InterPro:IPR003676); BEST Arabidopsis thaliana protein match is: SAUR-like auxin-responsive protein family (TAIR:AT1G56150.1); Has 1206 Blast hits to 1201 proteins in 26 species: Archae - 0; Bacteria - 0; Metazoa - 0; Fungi - 0; Plants - 1205; Viruses - 0; Other Eukaryotes - 1 (source: NCBI BLin…	protein_coding			1.58809	2.99421	5.6321	1.68e-06	0.00011482	5.05732
AT3G14540	AT3G14540.1	Terpenoid cyclases/Protein prenyltransferases superfamily protein; FUNCTIONS IN: lyase activity, magnesium ion binding; INVOLVED IN: metabolic process; CONTAINS InterPro DOMAIN/s: Terpene synthase, metal-binding domain (InterPro:IPR005630), Terpenoid synthase (InterPro:IPR008949), Terpenoid cylases/protein prenyltransferase alpha-alpha toroid (InterPro:IPR008930), Terpene synthase-like (InterPro:…	protein_coding			1.57766	-2.73759	3.18273	0.00286465	0.0235049	-1.69514
AT4G24110	AT4G24110.1	unknown protein; Has 76 Blast hits to 76 proteins in 13 species: Archae - 0; Bacteria - 0; Metazoa - 1; Fungi - 0; Plants - 75; Viruses - 0; Other Eukaryotes - 0 (source: NCBI BLink).	protein_coding			1.57546	1.53209	3.67718	0.000709916	0.00879561	-0.499159
AT5G65300	AT5G65300.1	unknown protein; Has 30201 Blast hits to 17322 proteins in 780 species: Archae - 12; Bacteria - 1396; Metazoa - 17338; Fungi - 3422; Plants - 5037; Viruses - 0; Other Eukaryotes - 2996 (source: NCBI BLink).	protein_coding			1.57409	1.94783	4.24828	0.00012961	0.00264215	0.991032
AT5G21950	AT5G21950.1	alpha/beta-Hydrolases superfamily protein; CONTAINS InterPro DOMAIN/s: Alpha/beta hydrolase fold-1 (InterPro:IPR000073); BEST Arabidopsis thaliana protein match is: alpha/beta-Hydrolases superfamily protein (TAIR:AT4G33180.1); Has 30201 Blast hits to 17322 proteins in 780 species: Archae - 12; Bacteria - 1396; Metazoa - 17338; Fungi - 3422; Plants - 5037; Viruses - 0; Other Eukaryotes - 2996 (sou…	protein_coding			1.56634	1.10644	4.71954	3.03e-05	0.000952969	2.37416
AT1G20480	AT1G20480.1	AMP-dependent synthetase and ligase family protein; FUNCTIONS IN: 4-coumarate-CoA ligase activity; INVOLVED IN: phenylpropanoid metabolic process, metabolic process; LOCATED IN: cellular_component unknown; EXPRESSED IN: sperm cell; CONTAINS InterPro DOMAIN/s: AMP-binding, conserved site (InterPro:IPR020845), AMP-dependent synthetase/ligase (InterPro:IPR000873); BEST Arabidopsis thaliana protein m…	protein_coding			1.56358	1.47633	5.81414	9.41e-07	7.61e-05	5.61907
AT2G22880	AT2G22880.1	VQ motif-containing protein; FUNCTIONS IN: molecular_function unknown; INVOLVED IN: biological_process unknown; LOCATED IN: chloroplast; EXPRESSED IN: 8 plant structures; EXPRESSED DURING: LP.06 six leaves visible, LP.04 four leaves visible, LP.10 ten leaves visible, LP.08 eight leaves visible, LP.12 twelve leaves visible; CONTAINS InterPro DOMAIN/s: VQ (InterPro:IPR008889); BEST Arabidopsis thal…	protein_coding			1.55637	2.15656	2.99996	0.00468923	0.0335239	-2.26392
AT5G49360	AT5G49360.1	Encodes a bifunctional {beta}-D-xylosidase/{alpha}-L-arabinofuranosidase required for pectic arabinan modification. Located in the extracellular matrix. Gene is expressed specifically in tissues undergoing secondary wall thickening. This is a member of glycosyl hydrolase family 3 and has six other closely related members.	protein_coding	BETA-XYLOSIDASE 1 (BXL1)	BETA-XYLOSIDASE 1 (BXL1);BETA-XYLOSIDASE 1 (ATBXL1)	1.53906	9.37172	3.42276	0.00147059	0.0147812	-1.47958
AT2G32150	AT2G32150.1	Haloacid dehalogenase-like hydrolase (HAD) superfamily protein; FUNCTIONS IN: hydrolase activity, catalytic activity; INVOLVED IN: metabolic process; LOCATED IN: cellular_component unknown; EXPRESSED IN: 24 plant structures; EXPRESSED DURING: 13 growth stages; CONTAINS InterPro DOMAIN/s: Haloacid dehalogenase-like hydrolase (InterPro:IPR005834), Pyrimidine 5-nucleotidase (InterPro:IPR010237), HAD…	protein_coding			1.53404	7.57952	3.83159	0.000451943	0.00634746	-0.44211
AT2G30360	AT2G30360.1	Encodes a SOS2-like protein kinase that is a member of the CBL-interacting protein kinase family.Loss of function mutants show a decrease in sensitivity to high pH.Phosphorylates AHA2, a plasma membrane H+ ATPase.This phosphorylation appears to regulate the activity of the proton transporter.	protein_coding	SOS3-INTERACTING PROTEIN 4 (SIP4)	SNF1-RELATED PROTEIN KINASE 3.22 (SNRK3.22);SOS3-INTERACTING PROTEIN 4 (SIP4);PROTEIN KINASE SOS2-LIKE 5 (PKS5);CBL-INTERACTING PROTEIN KINASE 11 (CIPK11)	1.52852	4.61211	3.64869	0.000771006	0.00934149	-0.714783
AT1G77760	AT1G77760.1	Encodes the cytosolic minor isoform of nitrate reductase (NR). Involved in the first step of nitrate assimilation, it contributes about 15% of the nitrate reductase activity in shoots. Similar to molybdopterin oxidoreductases at the N-terminus, and to FAD/NAD-binding cytochrome reductases at the C-terminus. Cofactors: FAD, heme iron (cytochrome B-557), and molybdenum-pterin.	protein_coding	NITRATE REDUCTASE 1 (NIA1)	NITRATE REDUCTASE 1 (NR1); (GNR1);NITRATE REDUCTASE 1 (NIA1)	1.52517	6.8438	3.38143	0.00165194	0.0161468	-1.60488
AT5G51190	AT5G51190.1	encodes a member of the ERF (ethylene response factor) subfamily B-3 of ERF/AP2 transcription factor family. The protein contains one AP2 domain. There are 18 members in this subfamily including ATERF-1, ATERF-2, AND ATERF-5.	protein_coding			1.52274	3.14534	2.9897	0.00481876	0.0341707	-2.5554
AT3G22750	AT3G22750.1	Protein kinase superfamily protein; FUNCTIONS IN: protein serine/threonine kinase activity, protein kinase activity, kinase activity, ATP binding; INVOLVED IN: protein amino acid phosphorylation; LOCATED IN: plasma membrane; EXPRESSED IN: 13 plant structures; EXPRESSED DURING: L mature pollen stage, M germinated pollen stage, LP.04 four leaves visible, 4 anthesis, petal differentiation and expans…	protein_coding			1.52198	2.73703	4.48926	6.19e-05	0.00157727	1.72618
AT1G49130	AT1G49130.1	B-box type zinc finger protein with CCT domain; FUNCTIONS IN: sequence-specific DNA binding transcription factor activity, zinc ion binding; INVOLVED IN: regulation of transcription; LOCATED IN: intracellular; CONTAINS InterPro DOMAIN/s: CCT domain (InterPro:IPR010402), Zinc finger, B-box (InterPro:IPR000315); BEST Arabidopsis thaliana protein match is: B-box type zinc finger protein with CCT dom…	protein_coding			1.51695	4.4804	5.41292	3.39e-06	0.000190739	4.261
AT1G63840	AT1G63840.1	RING/U-box superfamily protein; FUNCTIONS IN: zinc ion binding; INVOLVED IN: response to abscisic acid stimulus; LOCATED IN: endomembrane system; EXPRESSED IN: 22 plant structures; EXPRESSED DURING: 13 growth stages; CONTAINS InterPro DOMAIN/s: Zinc finger, RING-type (InterPro:IPR001841), Zinc finger, C3HC4 RING-type (InterPro:IPR018957); BEST Arabidopsis thaliana protein match is: RING/U-box sup…	protein_coding			1.51647	3.82662	4.02305	0.000255893	0.00418661	0.442432
AT3G57520	AT3G57520.1	SIP2 encodes a raffinose-specific alpha-galactosidase that catalyzes the breakdown of raffinose into alpha-galatose and sucrose. This enzyme may function in unloading raffinose from the phloem as part of sink metabolism. Although it was originally predicted to act as a raffinose synthase (RS), that activity was not observed for recombinant SIP2.	protein_coding	SEED IMBIBITION 2 (SIP2)	RAFFINOSE SYNTHASE 2 (RS2);SEED IMBIBITION 2 (SIP2);SEED IMBIBITION 2 (AtSIP2)	1.51645	8.5188	3.02724	0.00436051	0.0317467	-2.35784
AT4G24230	AT4G24230.6	acyl-CoA-binding protein ACBP3. Localized extracellularly in transiently expressed tobacco BY-2 cells and onion epidermal cells. Binds arachidonyl-CoA with high affinity. Microarray data shows up-regulation of many biotic- and abiotic-stress-related genes in an ACBP3 OE-1 in comparison to wild type.	protein_coding	ACYL-COA-BINDING DOMAIN 3 (ACBP3)	ACYL-COA-BINDING DOMAIN 3 (ACBP3)	1.51603	6.80365	3.49017	0.00121502	0.0129304	-1.35108
AT3G20810	AT3G20810.2	JMJD5 encodes a protein which contains a jumonji-C (jmjC) domain. The jumonji-C is frequently found in proteins with histone demethylase activity. jmjd5 mutant plants have a short-period circadian phenotype.	protein_coding	JUMONJI DOMAIN CONTAINING 5 (JMJD5)	JUMONJI C DOMAIN-CONTAINING PROTEIN 30 (JMJ30);JUMONJI DOMAIN CONTAINING 5 (JMJD5)	1.51594	4.61599	6.66098	6.31e-08	1.01e-05	8.14374
AT1G72900	AT1G72900.1	Toll-Interleukin-Resistance (TIR) domain-containing protein; FUNCTIONS IN: transmembrane receptor activity, ATP binding; INVOLVED IN: signal transduction, defense response, apoptosis, innate immune response; LOCATED IN: intrinsic to membrane; EXPRESSED IN: 20 plant structures; EXPRESSED DURING: 10 growth stages; CONTAINS InterPro DOMAIN/s: NB-ARC (InterPro:IPR002182), Toll-Interleukin receptor (I…	protein_coding			1.51122	3.39608	4.07188	0.00022102	0.00381328	0.247162
AT2G23810	AT2G23810.1	Member of TETRASPANIN family	protein_coding	TETRASPANIN8 (TET8)	TETRASPANIN8 (TET8)	1.51014	7.24303	6.14101	3.31e-07	3.41e-05	6.52914
AT1G06820	AT1G06820.1	Encodes carotenoid isomerase. Catalyzes the isomerization of poly-cis-carotenoids to all-trans-carotenoids. Together with PDS and ZDS, CRTiso is required to complete the synthesis of lycopene from phytoene.	protein_coding	CAROTENOID ISOMERASE (CRTISO)	CAROTENOID ISOMERASE (CRTISO);CAROTENOID AND CHLOROPLAST REGULATION 2 (CCR2)	1.5078	6.00568	7.36955	6.74e-09	2.06e-06	10.3289
AT3G10190	AT3G10190.1	Calcium-binding EF-hand family protein; FUNCTIONS IN: calcium ion binding; INVOLVED IN: biological_process unknown; LOCATED IN: plasma membrane; EXPRESSED IN: 18 plant structures; EXPRESSED DURING: 8 growth stages; CONTAINS InterPro DOMAIN/s: EF-Hand 1, calcium-binding site (InterPro:IPR018247), EF-HAND 2 (InterPro:IPR018249), EF-hand-like domain (InterPro:IPR011992), Calcium-binding EF-hand (Int…	protein_coding			1.50464	3.30168	3.92601	0.000341794	0.00522318	0.15785
AT1G72910	AT1G72910.1	Toll-Interleukin-Resistance (TIR) domain-containing protein; FUNCTIONS IN: transmembrane receptor activity, ATP binding; INVOLVED IN: signal transduction, defense response, apoptosis, innate immune response; LOCATED IN: intrinsic to membrane; CONTAINS InterPro DOMAIN/s: NB-ARC (InterPro:IPR002182), Toll-Interleukin receptor (InterPro:IPR000157); BEST Arabidopsis thaliana protein match is: Toll-In…	protein_coding			1.50025	0.518483	3.29856	0.00208195	0.0189492	-1.87811
AT5G59550	AT5G59550.1	Encodes an ABA- and drought-induced RING-DUF1117 gene whose mutation results in hyposensitive phenotypes toward ABA in terms of germination rate and stomatal closure and markedly reduced tolerance to drought stress relative to wild-type plants.	protein_coding	RING AND DOMAIN OF UNKNOWN FUNCTION 1117 2 (RDUF2)	RING AND DOMAIN OF UNKNOWN FUNCTION 1117 2 (RDUF2);ARABIDOPSIS THALIANA RING AND DOMAIN OF UNKNOWN FUNCTION 1117 2 (ATRDUF2)	1.49156	5.29481	5.85305	8.31e-07	7.01e-05	5.62717
AT3G19580	AT3G19580.1	Encodes zinc finger protein. mRNA levels are upregulated in response to ABA, high salt, and mild dessication. The protein is localized to the nucleus and acts as a transcriptional repressor.	protein_coding	ZINC-FINGER PROTEIN 2 (ZF2)	ZINC-FINGER PROTEIN 2 (ZF2);ZINC-FINGER PROTEIN 2 (AZF2)	1.48757	4.04263	3.45736	0.00133358	0.0138141	-1.17432
AT5G24590	AT5G24590.2	Member of NAc protein family. Interacts with turnip crinkle virus (TCV) capsid protein. Transcription factor involved in regulating the defense response of Arabidopsis to TCV.	protein_coding	TCV-INTERACTING PROTEIN (TIP)	TCV-INTERACTING PROTEIN (TIP);ARABIDOPSIS NAC DOMAIN CONTAINING PROTEIN 91 (ANAC091)	1.48301	5.5021	6.47084	1.16e-07	1.58e-05	7.54912
AT5G50915	AT5G50915.1	basic helix-loop-helix (bHLH) DNA-binding superfamily protein; FUNCTIONS IN: DNA binding, sequence-specific DNA binding transcription factor activity; INVOLVED IN: response to gibberellin stimulus; LOCATED IN: nucleus; EXPRESSED IN: 23 plant structures; EXPRESSED DURING: 13 growth stages; CONTAINS InterPro DOMAIN/s: Helix-loop-helix DNA-binding domain (InterPro:IPR001092), Helix-loop-helix DNA-bi…	protein_coding			1.47233	1.99019	4.15719	0.000170882	0.00321795	0.606901
AT1G66160	AT1G66160.1	"CYS, MET, PRO, and GLY protein 1" (CMPG1); FUNCTIONS IN: ubiquitin-protein ligase activity, binding; INVOLVED IN: response to chitin; LOCATED IN: ubiquitin ligase complex; EXPRESSED IN: 18 plant structures; EXPRESSED DURING: 9 growth stages; CONTAINS InterPro DOMAIN/s: U box domain (InterPro:IPR003613), Armadillo-type fold (InterPro:IPR016024); BEST Arabidopsis thaliana protein match is: ARM rep…	protein_coding	"CYS, MET, PRO, AND GLY PROTEIN 1" (CMPG1)	"CYS, MET, PRO, AND GLY PROTEIN 1" (CMPG1); (ATCMPG1)	1.46263	3.30948	2.92662	0.00569234	0.038527	-2.60091
AT5G56550	AT5G56550.1	Encodes OXIDATIVE STRESS 3 (OXS3)&#65292; involved in tolerance to heavy metals and oxidative stress.	protein_coding	OXIDATIVE STRESS 3 (OXS3)	OXIDATIVE STRESS 3 (OXS3);OXIDATIVE STRESS 3 (ATOXS3)	1.46009	5.24033	3.72241	0.000622394	0.00805697	-0.738193
AT2G35930	AT2G35930.1	Encodes a cytoplasmically localized U-box domain containing E3 ubiquitin ligase that is involved in the response to water stress and acts as a negative regulator of PAMP-triggered immunity.	protein_coding	PLANT U-BOX 23 (PUB23)	PLANT U-BOX 23 (PUB23); (ATPUB23)	1.45933	2.88803	3.23843	0.00245865	0.0212796	-1.89809
AT5G09440	AT5G09440.1	EXORDIUM like 4 (EXL4); FUNCTIONS IN: molecular_function unknown; INVOLVED IN: biological_process unknown; LOCATED IN: membrane; EXPRESSED IN: 23 plant structures; EXPRESSED DURING: 13 growth stages; CONTAINS InterPro DOMAIN/s: Phosphate-induced protein 1 (InterPro:IPR006766); BEST Arabidopsis thaliana protein match is: EXORDIUM like 2 (TAIR:AT5G64260.1); Has 396 Blast hits to 396 proteins in 24 …	protein_coding	EXORDIUM LIKE 4 (EXL4)	EXORDIUM LIKE 4 (EXL4)	1.45431	6.6968	4.63582	3.93e-05	0.00114708	2.07637
AT1G30820	AT1G30820.1	CTP synthase family protein; FUNCTIONS IN: CTP synthase activity, catalytic activity; INVOLVED IN: pyrimidine ribonucleotide metabolic process, pyrimidine nucleotide biosynthetic process; EXPRESSED IN: 21 plant structures; EXPRESSED DURING: 13 growth stages; CONTAINS InterPro DOMAIN/s: Glutamine amidotransferase class-I, C-terminal (InterPro:IPR000991), CTP synthase (InterPro:IPR004468), CTP synt…	protein_coding			1.44813	6.71659	4.01235	0.000264221	0.00427085	0.125222
AT5G49740	AT5G49740.1	Encodes a chloroplast ferric chelate reductase. Shows differential splicing and has three different mRNA products. Expressed in the shoot, flower and cotyledon.	protein_coding	FERRIC REDUCTION OXIDASE 7 (FRO7)	FERRIC REDUCTION OXIDASE 7 (ATFRO7);FERRIC REDUCTION OXIDASE 7 (FRO7)	1.44737	2.36025	6.04455	4.51e-07	4.32e-05	6.24625
AT4G34138	AT4G34138.1	UDP-glucosyl transferase 73B1 (UGT73B1); FUNCTIONS IN: quercetin 3-O-glucosyltransferase activity, UDP-glycosyltransferase activity, quercetin 7-O-glucosyltransferase activity, abscisic acid glucosyltransferase activity; INVOLVED IN: metabolic process; LOCATED IN: endomembrane system; EXPRESSED IN: 20 plant structures; EXPRESSED DURING: 10 growth stages; CONTAINS InterPro DOMAIN/s: UDP-glucuronos…	protein_coding	UDP-GLUCOSYL TRANSFERASE 73B1 (UGT73B1)	UDP-GLUCOSYL TRANSFERASE 73B1 (UGT73B1)	1.44586	6.16074	5.71368	1.3e-06	9.48e-05	5.19288
AT1G23870	AT1G23870.1	Encodes an enzyme putatively involved in trehalose biosynthesis. The protein has a trehalose synthase (TPS)-like domain that may or may not be active as well as a trehalose phosphatase (TPP)-like domain.	protein_coding	TREHALOSE-PHOSPHATASE/SYNTHASE 9 (TPS9)	TREHALOSE-PHOSPHATASE/SYNTHASE 9 (TPS9);TREHALOSE -6-PHOSPHATASE SYNTHASE S9 (TPS9);TREHALOSE-PHOSPHATASE/SYNTHASE 9 (ATTPS9)	1.44456	7.04706	4.50546	5.89e-05	0.00151767	1.50142
AT2G43840	AT2G43840.2	UGT74F1 transfers UDP:glucose to salicylic acid (forming a glucoside), benzoic acid, quercetin, and athranilate in vitro. UGT74F1 shows a weak ability to catalyze the formation of the p-aminobenzoate-glucose ester in vitro. But, UGT75B1 appears to be the dominant pABA acylglucosyltransferase in vivo based on assays in leaves, flowers, and siliques. The true biological substrate(s) of UGT74F1 are …	protein_coding	UDP-GLYCOSYLTRANSFERASE 74 F1 (UGT74F1)	UDP-GLYCOSYLTRANSFERASE 74 F1 (UGT74F1)	1.4398	0.204896	2.84448	0.00705284	0.0447668	-2.3781
AT1G12780	AT1G12780.1	Encodes a UDP-glucose epimerase that catalyzes the interconversion of the sugar nucleotides UDP-glucose UDP-galactose via a UDP-4-keto-hexose intermediate. Responsive to stress.	protein_coding	UDP-D-GLUCOSE/UDP-D-GALACTOSE 4-EPIMERASE 1 (UGE1)	UDP-D-GLUCOSE/UDP-D-GALACTOSE 4-EPIMERASE 1 (UGE1);A. THALIANA UDP-GLC 4-EPIMERASE 1 (ATUGE1)	1.43631	7.7001	4.29388	0.000112788	0.00238142	0.926301
AT2G28500	AT2G28500.1	LOB domain-containing protein 11 (LBD11); INVOLVED IN: biological_process unknown; LOCATED IN: chloroplast; CONTAINS InterPro DOMAIN/s: Lateral organ boundaries, LOB (InterPro:IPR004883); BEST Arabidopsis thaliana protein match is: LOB domain-containing protein 1 (TAIR:AT1G07900.1); Has 1191 Blast hits to 1170 proteins in 85 species: Archae - 8; Bacteria - 66; Metazoa - 21; Fungi - 2; Plants - 10…	protein_coding	LOB DOMAIN-CONTAINING PROTEIN 11 (LBD11)	LOB DOMAIN-CONTAINING PROTEIN 11 (LBD11)	1.43148	0.498589	3.06148	0.00397854	0.029776	-1.95747
AT3G29240	AT3G29240.1	Protein of unknown function (DUF179); FUNCTIONS IN: molecular_function unknown; INVOLVED IN: biological_process unknown; LOCATED IN: chloroplast thylakoid lumen, chloroplast; EXPRESSED IN: 22 plant structures; EXPRESSED DURING: 13 growth stages; CONTAINS InterPro DOMAIN/s: Protein of unknown function DUF179 (InterPro:IPR003774); BEST Arabidopsis thaliana protein match is: Protein of unknown funct…	protein_coding			1.42955	7.86055	4.96537	1.4e-05	0.000542309	2.92229
AT1G55810	AT1G55810.1	One of the homologous genes predicted to encode proteins with UPRT domains (Uracil phosphoribosyltransferase). Five of these genes (At5g40870, At3g27190, At1g55810, At4g26510 and At3g27440) show a high level of identity, and are annotated as also containing a N-terminal uracil kinase (UK) domain. These genes are referred to as UKL1 (UK-like 1), UKL2, UKL3, UKL4 and UKL5, respectively.	protein_coding	URIDINE KINASE-LIKE 3 (UKL3)	URIDINE KINASE-LIKE 3 (UKL3)	1.42007	6.22109	4.44587	7.08e-05	0.00174077	1.3237
AT1G61890	AT1G61890.1	MATE efflux family protein; FUNCTIONS IN: antiporter activity, drug transmembrane transporter activity, transporter activity; INVOLVED IN: response to karrikin; LOCATED IN: membrane; EXPRESSED IN: 22 plant structures; EXPRESSED DURING: 13 growth stages; CONTAINS InterPro DOMAIN/s: Multi antimicrobial extrusion protein MatE (InterPro:IPR002528); BEST Arabidopsis thaliana protein match is: MATE eff…	protein_coding			1.40961	6.27349	4.04217	0.000241639	0.00403961	0.150268
AT2G46510	AT2G46510.1	Encodes a nuclear localized BLH domain containing transcriptional activator involved in response to ABA. Overexpression confers enhanced ABA responsiveness while loss of function mutants are ABA sensitive.	protein_coding	ABA-INDUCIBLE BHLH-TYPE TRANSCRIPTION FACTOR (AIB)	ABA-INDUCIBLE BHLH-TYPE TRANSCRIPTION FACTOR (ATAIB);ABA-INDUCIBLE BHLH-TYPE TRANSCRIPTION FACTOR (AIB)	1.409	4.45598	5.35203	4.11e-06	0.00022373	4.07682
AT1G19020	AT1G19020.1	unknown protein; BEST Arabidopsis thaliana protein match is: unknown protein (TAIR:AT3G48180.1); Has 88 Blast hits to 88 proteins in 15 species: Archae - 0; Bacteria - 0; Metazoa - 0; Fungi - 0; Plants - 88; Viruses - 0; Other Eukaryotes - 0 (source: NCBI BLink).	protein_coding			1.40829	3.36161	3.25354	0.00235831	0.0207057	-1.86504
AT1G24090	AT1G24090.1	RNase H family protein; FUNCTIONS IN: ribonuclease H activity, nucleic acid binding; INVOLVED IN: biological_process unknown; EXPRESSED IN: 11 plant structures; EXPRESSED DURING: 6 growth stages; CONTAINS InterPro DOMAIN/s: Ribosomal protein L9/RNase H1, N-terminal (InterPro:IPR009027), Polynucleotidyl transferase, ribonuclease H fold (InterPro:IPR012337), Ribonuclease H (InterPro:IPR002156); BES…	protein_coding			1.4058	0.377545	4.04032	0.000242987	0.00405242	0.449315
AT4G18340	AT4G18340.1	Glycosyl hydrolase superfamily protein; FUNCTIONS IN: cation binding, hydrolase activity, hydrolyzing O-glycosyl compounds, catalytic activity; INVOLVED IN: carbohydrate metabolic process; LOCATED IN: endomembrane system; EXPRESSED IN: 21 plant structures; EXPRESSED DURING: 13 growth stages; CONTAINS InterPro DOMAIN/s: Glycoside hydrolase, catalytic core (InterPro:IPR017853), Glycoside hydrolase,…	protein_coding			1.39575	3.5222	3.4596	0.00132516	0.0137503	-1.2639
AT1G32928	AT1G32928.1	unknown protein; BEST Arabidopsis thaliana protein match is: unknown protein (TAIR:AT1G32920.1); Has 35333 Blast hits to 34131 proteins in 2444 species: Archae - 798; Bacteria - 22429; Metazoa - 974; Fungi - 991; Plants - 531; Viruses - 0; Other Eukaryotes - 9610 (source: NCBI BLink).	protein_coding			1.39229	3.15307	4.87987	1.83e-05	0.000658421	2.7047
AT5G56100	AT5G56100.1	glycine-rich protein / oleosin; FUNCTIONS IN: molecular_function unknown; INVOLVED IN: lipid storage; LOCATED IN: monolayer-surrounded lipid storage body, integral to membrane, membrane; EXPRESSED IN: 21 plant structures; EXPRESSED DURING: 12 growth stages; CONTAINS InterPro DOMAIN/s: Oleosin (InterPro:IPR000136); Has 1807 Blast hits to 1807 proteins in 277 species: Archae - 0; Bacteria - 0; Meta…	protein_coding			1.3899	3.95653	3.5844	0.000928083	0.0106719	-0.926433
AT2G22500	AT2G22500.1	Encodes one of the mitochondrial dicarboxylate carriers (DIC): DIC1 (AT2G22500), DIC2 (AT4G24570), DIC3 (AT5G09470).	protein_coding	UNCOUPLING PROTEIN 5 (UCP5)	PLANT UNCOUPLING MITOCHONDRIAL PROTEIN 5 (ATPUMP5);DICARBOXYLATE CARRIER 1 (DIC1);UNCOUPLING PROTEIN 5 (UCP5)	1.38867	5.016	3.59649	0.000896357	0.0104097	-1.10611
AT5G14410	AT5G14410.1	unknown protein; Has 23 Blast hits to 23 proteins in 9 species: Archae - 0; Bacteria - 0; Metazoa - 0; Fungi - 0; Plants - 23; Viruses - 0; Other Eukaryotes - 0 (source: NCBI BLink).	protein_coding			1.37886	3.42074	5.36562	3.94e-06	0.000215939	4.14971
AT3G49530	AT3G49530.1	Transcription factor that serves as a molecular link between cold signals and pathogen resistance responses. Undergoes proteolytic processing triggered by cold-induced changes in membrane fluidity.	protein_coding	NAC DOMAIN CONTAINING PROTEIN 62 (NAC062)	NTM1 (NAC WITH TRANSMEMBRANE MOTIF 1)-LIKE 6 (NTL6);NAC DOMAIN CONTAINING PROTEIN 62 (NAC062);NAC DOMAIN CONTAINING PROTEIN 62 (ANAC062)	1.37406	5.2689	5.05684	1.05e-05	0.000441352	3.16292
AT5G18170	AT5G18170.1	Encodes the 43 kDa alpha-subunit of the glutamate dehydrogenase with a putative mitochondrial transit polypeptide and NAD(H)- and alpha-ketoglutarate-binding domains. Mitochondrial localization confirmed by subcellular fractionation. Combines in several ratios with GDH2 protein (GDH-beta) to form seven isoenzymes. Catalyzes the cleavage of glycine residues. May be involved in ammonia assimilation…	protein_coding	GLUTAMATE DEHYDROGENASE 1 (GDH1)	GLUTAMATE DEHYDROGENASE 1 (GDH1)	1.36624	7.01968	4.61213	4.23e-05	0.00120683	1.89104
AT5G62470	AT5G62470.2	Encodes a R2R3 type Myb transcription factor whose expression is strongly induced by abscisic acid. Mediates abscisic acid signaling during drought stress response.	protein_coding	MYB DOMAIN PROTEIN 96 (MYB96)	MYB DOMAIN PROTEIN 96 (MYB96)	1.36531	4.14524	3.42475	0.00146239	0.014727	-1.4336
AT5G05410	AT5G05410.1	Encodes a transcription factor that specifically binds to DRE/CRT cis elements (responsive to drought and low-temperature stress). Belongs to the DREB subfamily A-2 of ERF/AP2 transcription factor family (DREB2A). There are eight members in this subfamily including DREB2B. The protein contains one AP2 domain. Overexpression of transcriptional activation domain of DREB2A resulted in significant dr…	protein_coding	DRE-BINDING PROTEIN 2A (DREB2A)	DRE-BINDING PROTEIN 2A (DREB2A);DEHYDRATION-RESPONSIVE ELEMENT BINDING PROTEIN 2 (DREB2)	1.35449	4.46172	4.04369	0.000240544	0.00402767	0.287387
AT2G35744	AT2G35744.1	snoRNA; snoRNA	small_nucleolar_rna			1.35221	1.23256	3.36177	0.00174557	0.0168155	-1.25104
AT5G03720	AT5G03720.1	Member of Heat Stress Transcription Factor (Hsf) family. Expression is regulated by DREB2A and in turn HSFA3 regulates the expression of hsps Hsp18.1-CI and Hsp26.5-MII35S. Involved in establishing thermotolerence.	protein_coding	HEAT SHOCK TRANSCRIPTION FACTOR A3 (HSFA3)	HEAT SHOCK TRANSCRIPTION FACTOR A3 (HSFA3);ARABIDOPSIS THALIANA HEAT SHOCK TRANSCRIPTION FACTOR A3 (AT-HSFA3)	1.35115	2.59178	4.15768	0.000170627	0.00321603	0.765569
AT1G72940	AT1G72940.1	Toll-Interleukin-Resistance (TIR) domain-containing protein; FUNCTIONS IN: transmembrane receptor activity, ATP binding; INVOLVED IN: signal transduction, defense response, apoptosis, innate immune response; LOCATED IN: intrinsic to membrane; EXPRESSED IN: 22 plant structures; EXPRESSED DURING: 13 growth stages; CONTAINS InterPro DOMAIN/s: NB-ARC (InterPro:IPR002182), Toll-Interleukin receptor (I…	protein_coding			1.3507	3.51715	4.29168	0.00011355	0.00239139	0.8855
AT2G37690	AT2G37690.1	phosphoribosylaminoimidazole carboxylase, putative / AIR carboxylase, putative; FUNCTIONS IN: phosphoribosylaminoimidazole carboxylase activity, catalytic activity, ATP binding; INVOLVED IN: 'de novo' IMP biosynthetic process, pollen development; LOCATED IN: chloroplast; CONTAINS InterPro DOMAIN/s: Phosphoribosylaminoimidazole carboxylase (InterPro:IPR016301), PreATP-grasp-like fold (InterPro:IPR…	protein_coding			1.34331	4.05886	4.60913	4.27e-05	0.00121482	1.85159
AT5G65350	AT5G65350.1	histone 3 11 (HTR11); FUNCTIONS IN: DNA binding; INVOLVED IN: nucleosome assembly; LOCATED IN: nucleosome; EXPRESSED IN: 8 plant structures; EXPRESSED DURING: 6 growth stages; CONTAINS InterPro DOMAIN/s: Histone H3 (InterPro:IPR000164), Histone-fold (InterPro:IPR009072), Histone core (InterPro:IPR007125); BEST Arabidopsis thaliana protein match is: Histone superfamily protein (TAIR:AT5G10400.1); …	protein_coding	HISTONE 3 11 (HTR11)	HISTONE 3 11 (HTR11)	1.34309	0.0544047	3.72943	0.000609785	0.00791816	-0.318382
AT3G46600	AT3G46600.1	GRAS family transcription factor; CONTAINS InterPro DOMAIN/s: Transcription factor GRAS (InterPro:IPR005202); BEST Arabidopsis thaliana protein match is: GRAS family transcription factor (TAIR:AT5G59450.1); Has 2508 Blast hits to 2402 proteins in 303 species: Archae - 0; Bacteria - 7; Metazoa - 2; Fungi - 0; Plants - 2499; Viruses - 0; Other Eukaryotes - 0 (source: NCBI BLink).	protein_coding			1.34198	6.38091	7.45257	5.2e-09	1.79e-06	10.5783
AT1G52240	AT1G52240.1	Encodes a member of KPP-like gene family, homolog of KPP (kinase partner protein) gene in tomato. Also a member of the RopGEF (guanine nucleotide exchange factor) family, containing the novel PRONE domain (plant-specific Rop nucleotide exchanger), which is exclusively active towards members of the Rop subfamily .	protein_coding	RHO GUANYL-NUCLEOTIDE EXCHANGE FACTOR 11 (ROPGEF11)	RHO GUANYL-NUCLEOTIDE EXCHANGE FACTOR 11 (ROPGEF11); (ATROPGEF11);PHYTOCHROME INTERACTING ROPGEF 1 (PIRF1)	1.33891	2.55749	3.50307	0.00117121	0.0125854	-1.02682
AT2G42900	AT2G42900.1	Plant basic secretory protein (BSP) family protein; CONTAINS InterPro DOMAIN/s: Uncharacterised protein family, basic secretory protein (InterPro:IPR007541); Has 52 Blast hits to 52 proteins in 16 species: Archae - 0; Bacteria - 0; Metazoa - 1; Fungi - 0; Plants - 51; Viruses - 0; Other Eukaryotes - 0 (source: NCBI BLink).	protein_coding			1.33632	2.87268	4.42409	7.57e-05	0.00182624	1.47137
AT1G26450	AT1G26450.1	Carbohydrate-binding X8 domain superfamily protein; CONTAINS InterPro DOMAIN/s: X8 (InterPro:IPR012946); BEST Arabidopsis thaliana protein match is: plasmodesmata callose-binding protein 3 (TAIR:AT1G18650.1); Has 11073 Blast hits to 3511 proteins in 410 species: Archae - 18; Bacteria - 672; Metazoa - 2248; Fungi - 1003; Plants - 1218; Viruses - 195; Other Eukaryotes - 5719 (source: NCBI BLink).	protein_coding			1.33578	2.24261	4.49561	6.07e-05	0.00155228	1.58854
AT1G64380	AT1G64380.1	encodes a member of the DREB subfamily A-6 of ERF/AP2 transcription factor family. The protein contains one AP2 domain. There are 8 members in this subfamily including RAP2.4.	protein_coding			1.33177	2.88931	3.98651	0.000285435	0.00452665	0.157816
AT4G22753	AT4G22753.1	Encodes a member of the SMO1 family of sterol 4alpha-methyl oxidases.	protein_coding	STEROL 4-ALPHA METHYL OXIDASE 1-3 (SMO1-3)	(ATSMO1-3);STEROL 4-ALPHA METHYL OXIDASE 1-3 (SMO1-3);ARABIDOPSIS THALIANA STEROL 4-ALPHA-METHYL OXIDASE 1 (ATSMO1);STEROL C4-METHYL OXIDASE 1 (SMO1)	1.329	1.81222	6.5815	8.12e-08	1.23e-05	7.90996
AT3G26690	AT3G26690.1	Encodes AtNUDT13, a mitochondrial Nudix hydrolase specific for long-chain diadenosine polyphosphates.	protein_coding	NUDIX HYDROLASE HOMOLOG 13 (NUDX13)	NUDIX HYDROLASE HOMOLOG 13 (ATNUDX13);ARABIDOPSIS THALIANA NUDIX HYDROLASE HOMOLOG 13 (ATNUDT13);NUDIX HYDROLASE HOMOLOG 13 (NUDX13)	1.32452	4.14442	4.36086	9.19e-05	0.00204824	1.21068
AT4G33150	AT4G33150.1	Encodes two proteins. One protein is the monofunctional saccharopine dehydrogenase involved in lysine degradation. The longer protein from the same LKR/SDH locus is bifunctional and also has saccharopine dehydrogenase activity. The monofunctional SDH functions mainly to enhance the flux of lysine catabolism. Gene expression is induced by abscisic acid, jasmonate, and under sucrose starvation.	protein_coding			1.31753	6.78961	3.08528	0.0037318	0.0284034	-2.40747
AT4G27410	AT4G27410.3	Encodes a NAC transcription factor induced in response to dessication. It is localized to the nucleus and acts as a transcriptional activator in ABA-mediated dehydration response.	protein_coding	RESPONSIVE TO DESICCATION 26 (RD26)	RESPONSIVE TO DESICCATION 26 (RD26)	1.30655	3.56316	3.15127	0.00312126	0.0248927	-1.93716
AT3G24518	AT3G24518.1	Potential natural antisense gene, locus overlaps with AT3G24520	other_rna			1.30633	2.36318	3.47417	0.00127152	0.0134047	-1.00114
AT1G32920	AT1G32920.1	unknown protein; FUNCTIONS IN: molecular_function unknown; INVOLVED IN: response to wounding; LOCATED IN: endomembrane system; EXPRESSED IN: 23 plant structures; EXPRESSED DURING: 13 growth stages; BEST Arabidopsis thaliana protein match is: unknown protein (TAIR:AT1G32928.1); Has 42 Blast hits to 42 proteins in 8 species: Archae - 0; Bacteria - 0; Metazoa - 0; Fungi - 0; Plants - 42; Viruses - 0…	protein_coding			1.30571	5.52323	4.24108	0.000132485	0.00268512	0.712423
AT5G66960	AT5G66960.1	Prolyl oligopeptidase family protein; FUNCTIONS IN: serine-type peptidase activity, serine-type endopeptidase activity; INVOLVED IN: proteolysis; LOCATED IN: membrane; EXPRESSED IN: 15 plant structures; EXPRESSED DURING: 6 growth stages; CONTAINS InterPro DOMAIN/s: Peptidase S9, prolyl oligopeptidase, catalytic domain (InterPro:IPR001375), Peptidase S9A, oligopeptidase, N-terminal beta-propeller …	protein_coding			1.30088	1.2781	3.86809	0.000405798	0.00590884	0.00984547
AT5G03310	AT5G03310.1	SAUR-like auxin-responsive protein family ; CONTAINS InterPro DOMAIN/s: Auxin responsive SAUR protein (InterPro:IPR003676); BEST Arabidopsis thaliana protein match is: SAUR-like auxin-responsive protein family (TAIR:AT2G37030.1); Has 629 Blast hits to 627 proteins in 24 species: Archae - 0; Bacteria - 0; Metazoa - 0; Fungi - 0; Plants - 629; Viruses - 0; Other Eukaryotes - 0 (source: NCBI BLink).	protein_coding			1.29819	-0.537795	2.90368	0.00604514	0.0402891	-2.28106
AT5G23930	AT5G23930.1	Mitochondrial transcription termination factor family protein; FUNCTIONS IN: molecular_function unknown; INVOLVED IN: biological_process unknown; LOCATED IN: mitochondrion; CONTAINS InterPro DOMAIN/s: Mitochodrial transcription termination factor-related (InterPro:IPR003690); BEST Arabidopsis thaliana protein match is: Mitochondrial transcription termination factor family protein (TAIR:AT1G62085.…	protein_coding			1.29017	0.120744	2.87262	0.00655567	0.0425763	-2.33957
AT1G66400	AT1G66400.1	Encodes a calmodulin-like protein. Regulates nitric oxide levels and transition to flowering.	protein_coding	CALMODULIN LIKE 23 (CML23)	CALMODULIN LIKE 23 (CML23)	1.28801	2.58786	3.74395	0.000584473	0.00768934	-0.433609
AT3G49320	AT3G49320.1	Metal-dependent protein hydrolase; CONTAINS InterPro DOMAIN/s: Metal-dependent protein hydrolase (InterPro:IPR003226); BEST Arabidopsis thaliana protein match is: Metal-dependent protein hydrolase (TAIR:AT5G41970.1); Has 666 Blast hits to 662 proteins in 329 species: Archae - 0; Bacteria - 214; Metazoa - 145; Fungi - 141; Plants - 55; Viruses - 0; Other Eukaryotes - 111 (source: NCBI BLink).	protein_coding			1.2821	1.38845	3.62847	0.00081743	0.00976722	-0.681531
AT2G43930	AT2G43930.1	Protein kinase superfamily protein; FUNCTIONS IN: amino acid transmembrane transporter activity, protein kinase activity, ATP binding; INVOLVED IN: amino acid transport, protein amino acid phosphorylation, transmembrane transport; LOCATED IN: membrane; CONTAINS InterPro DOMAIN/s: Protein kinase, catalytic domain (InterPro:IPR000719), Amino acid/polyamine transporter I (InterPro:IPR002293), Serine…	protein_coding			1.27833	0.554376	2.90494	0.0060253	0.0401966	-2.26339
AT1G18270	AT1G18270.3	ketose-bisphosphate aldolase class-II family protein; FUNCTIONS IN: in 8 functions; INVOLVED IN: oxidation reduction, pentose-phosphate shunt, valine metabolic process, glycolysis, metabolic process; EXPRESSED IN: 23 plant structures; EXPRESSED DURING: 13 growth stages; CONTAINS InterPro DOMAIN/s: Aldolase-type TIM barrel (InterPro:IPR013785), 6-phosphogluconate dehydrogenase, NAD-binding (InterP…	protein_coding			1.27085	7.69356	4.64101	3.87e-05	0.00113877	1.94686
AT3G45730	AT3G45730.1	unknown protein; Has 3 Blast hits to 3 proteins in 1 species: Archae - 0; Bacteria - 0; Metazoa - 0; Fungi - 0; Plants - 3; Viruses - 0; Other Eukaryotes - 0 (source: NCBI BLink).	protein_coding			1.26923	4.94069	4.25722	0.000126131	0.00259136	0.760698
AT4G21970	AT4G21970.1	Protein of unknown function, DUF584; CONTAINS InterPro DOMAIN/s: Protein of unknown function DUF584 (InterPro:IPR007608); BEST Arabidopsis thaliana protein match is: Protein of unknown function, DUF584 (TAIR:AT4G04630.1); Has 30201 Blast hits to 17322 proteins in 780 species: Archae - 12; Bacteria - 1396; Metazoa - 17338; Fungi - 3422; Plants - 5037; Viruses - 0; Other Eukaryotes - 2996 (source: …	protein_coding			1.26822	0.241193	3.26071	0.0023121	0.0203637	-1.55216
AT3G51000	AT3G51000.1	alpha/beta-Hydrolases superfamily protein; FUNCTIONS IN: epoxide hydrolase activity, catalytic activity; EXPRESSED IN: 22 plant structures; EXPRESSED DURING: 13 growth stages; CONTAINS InterPro DOMAIN/s: Epoxide hydrolase-like (InterPro:IPR000639), Alpha/beta hydrolase fold-1 (InterPro:IPR000073); BEST Arabidopsis thaliana protein match is: alpha/beta-Hydrolases superfamily protein (TAIR:AT3G0560…	protein_coding			1.265	5.2591	5.58122	1.98e-06	0.000127221	4.77906
AT2G37760	AT2G37760.2	Encodes an NADPH-dependent aldo-keto reductase that can act on a wide variety of substrates in vitro including aliphatic and aromatic aldehydes and steroids. Transcript levels for this gene are up-regulated in response to cold, salt, and drought stress.	protein_coding	ALDO-KETO REDUCTASE FAMILY 4 MEMBER C8 (AKR4C8)	ALDO-KETO REDUCTASE FAMILY 4 MEMBER C8 (AKR4C8)	1.26468	4.43095	3.75492	0.000566015	0.00748873	-0.303609
AT3G15210	AT3G15210.1	Encodes a member of the ERF (ethylene response factor) subfamily B-1 of ERF/AP2 transcription factor family (ATERF-4). The protein contains one AP2 domain. Acts as a negative regulator of JA-responsive defense gene expression and resistance to the necrotrophic fungal pathogen Fusarium oxysporum and antagonizes JA inhibition of root elongation.	protein_coding	ETHYLENE RESPONSIVE ELEMENT BINDING FACTOR 4 (ERF4)	ETHYLENE RESPONSIVE ELEMENT BINDING FACTOR 4 (ATERF-4);ETHYLENE RESPONSIVE ELEMENT BINDING FACTOR 4 (ATERF4);RELATED TO AP2 5 (RAP2.5);ETHYLENE RESPONSIVE ELEMENT BINDING FACTOR 4 (ERF4)	1.26061	5.63983	4.19617	0.00015185	0.00295159	0.581011
AT1G76650	AT1G76650.1	calmodulin-like 38 (CML38); FUNCTIONS IN: calcium ion binding; INVOLVED IN: response to wounding; LOCATED IN: plasma membrane; EXPRESSED IN: 19 plant structures; EXPRESSED DURING: 12 growth stages; CONTAINS InterPro DOMAIN/s: EF-Hand 1, calcium-binding site (InterPro:IPR018247), EF-HAND 2 (InterPro:IPR018249), Calcium-binding EF-hand (InterPro:IPR002048), EF-hand-like domain (InterPro:IPR011992);…	protein_coding	CALMODULIN-LIKE 38 (CML38)		1.25483	3.70922	2.8499	0.00695431	0.0442216	-3.01988
AT3G07860	AT3G07860.1	Ubiquitin-like superfamily protein; BEST Arabidopsis thaliana protein match is: Ubiquitin-like superfamily protein (TAIR:AT5G25340.1); Has 145 Blast hits to 145 proteins in 50 species: Archae - 0; Bacteria - 0; Metazoa - 77; Fungi - 0; Plants - 65; Viruses - 0; Other Eukaryotes - 3 (source: NCBI BLink).	protein_coding			1.25453	2.52765	6.47777	1.13e-07	1.58e-05	7.6329
AT4G01250	AT4G01250.1	AtWRKY22 is a member of WRKY Transcription Factor; Group II-e. It is involved in regulation of dark induced leaf senescence.	protein_coding	(WRKY22)	(WRKY22); (AtWRKY22)	1.25109	3.82635	3.36358	0.00173672	0.0167583	-1.59597
AT5G46840	AT5G46840.1	RNA-binding (RRM/RBD/RNP motifs) family protein; FUNCTIONS IN: RNA binding, nucleotide binding, nucleic acid binding; EXPRESSED IN: 24 plant structures; EXPRESSED DURING: 15 growth stages; CONTAINS InterPro DOMAIN/s: RNA recognition motif, RNP-1 (InterPro:IPR000504), Nucleotide-binding, alpha-beta plait (InterPro:IPR012677); Has 1807 Blast hits to 1807 proteins in 277 species: Archae - 0; Bacteri…	protein_coding			1.24157	5.42912	5.2909	5e-06	0.000260689	3.87751
AT1G79840	AT1G79840.2	Glabra 2, a homeodomain protein affects epidermal cell identity including trichomes, root hairs, and seed coat. It also down-regulates seed oil content. Expressed in atrichoblasts and required to suppress root hair development. Also expressed abundantly during early seed development. Directly regulated by WER.	protein_coding	GLABRA 2 (GL2)	GLABRA 2 (GL2)	1.23668	1.75585	3.35767	0.00176572	0.01692	-1.3908
AT2G14170	AT2G14170.1	Arabidopsis thaliana methylmalonate-semialdehyde dehydrogenase	protein_coding	ALDEHYDE DEHYDROGENASE 6B2 (ALDH6B2)	ALDEHYDE DEHYDROGENASE 6B2 (ALDH6B2)	1.23663	7.31684	4.38067	8.65e-05	0.00196925	1.19676
AT2G36220	AT2G36220.1	unknown protein; BEST Arabidopsis thaliana protein match is: unknown protein (TAIR:AT3G52710.1); Has 74 Blast hits to 74 proteins in 10 species: Archae - 0; Bacteria - 0; Metazoa - 0; Fungi - 0; Plants - 74; Viruses - 0; Other Eukaryotes - 0 (source: NCBI BLink).	protein_coding			1.23358	5.28974	3.86313	0.000411789	0.00597948	-0.316987
AT1G10660	AT1G10660.2	unknown protein; LOCATED IN: endomembrane system; EXPRESSED IN: 24 plant structures; EXPRESSED DURING: 15 growth stages; BEST Arabidopsis thaliana protein match is: unknown protein (TAIR:AT5G62960.1); Has 35333 Blast hits to 34131 proteins in 2444 species: Archae - 798; Bacteria - 22429; Metazoa - 974; Fungi - 991; Plants - 531; Viruses - 0; Other Eukaryotes - 9610 (source: NCBI BLink).	protein_coding			1.23068	5.4096	10.461	7.11e-13	4.98e-09	19.2293
AT5G19240	AT5G19240.1	Glycoprotein membrane precursor GPI-anchored; FUNCTIONS IN: molecular_function unknown; INVOLVED IN: biological_process unknown; LOCATED IN: endomembrane system; EXPRESSED IN: 24 plant structures; EXPRESSED DURING: 14 growth stages; BEST Arabidopsis thaliana protein match is: Glycoprotein membrane precursor GPI-anchored (TAIR:AT5G19230.1); Has 1807 Blast hits to 1807 proteins in 277 species: Arch…	protein_coding			1.2273	3.73167	3.05387	0.00406059	0.0301913	-2.51313
AT3G20100	AT3G20100.1	member of CYP705A	protein_coding	"CYTOCHROME P450, FAMILY 705, SUBFAMILY A, POLYPEPTIDE 19" (CYP705A19)	"CYTOCHROME P450, FAMILY 705, SUBFAMILY A, POLYPEPTIDE 19" (CYP705A19)	1.22691	2.88038	3.88734	0.000383338	0.00565236	0.0270881
AT3G47640	AT3G47640.1	Encodes POPEYE (PYE), a bHLH transcription factor regulating response to iron deficiency in Arabidopsis roots.	protein_coding	POPEYE (PYE)	POPEYE (PYE)	1.22239	2.71934	3.61512	0.000849526	0.0100098	-0.75393
AT2G29660	AT2G29660.1	zinc finger (C2H2 type) family protein; CONTAINS InterPro DOMAIN/s: Zinc finger, C2H2-like (InterPro:IPR015880), Zinc finger, C2H2-type (InterPro:IPR007087); BEST Arabidopsis thaliana protein match is: zinc finger protein-related (TAIR:AT5G54630.1); Has 407 Blast hits to 407 proteins in 27 species: Archae - 0; Bacteria - 0; Metazoa - 0; Fungi - 28; Plants - 376; Viruses - 0; Other Eukaryotes - 3 …	protein_coding			1.21797	3.70136	4.31399	0.000106069	0.0022819	1.22258
AT1G22890	AT1G22890.1	unknown protein; FUNCTIONS IN: molecular_function unknown; INVOLVED IN: biological_process unknown; LOCATED IN: endomembrane system; EXPRESSED IN: 19 plant structures; EXPRESSED DURING: 11 growth stages; Has 17 Blast hits to 17 proteins in 2 species: Archae - 0; Bacteria - 0; Metazoa - 0; Fungi - 0; Plants - 17; Viruses - 0; Other Eukaryotes - 0 (source: NCBI BLink).	protein_coding			1.21136	3.34926	3.73445	0.000600919	0.00782723	-0.728282
AT1G54100	AT1G54100.1	Aldehyde dehydrogenase	protein_coding	ALDEHYDE DEHYDROGENASE 7B4 (ALDH7B4)	ALDEHYDE DEHYDROGENASE 7B4 (ALDH7B4)	1.21049	8.08488	4.34603	9.62e-05	0.00211785	1.04686
AT3G52400	AT3G52400.1	syntaxin protein, involved in the negative regulation of defense pathways such as programmed cell death, salicylic acid signalling pathway, jasmonic acid signalling pathway	protein_coding	SYNTAXIN OF PLANTS 122 (SYP122)	SYNTAXIN OF PLANTS 122 (SYP122); (ATSYP122)	1.20447	5.01462	4.02649	0.000253267	0.00415457	0.0938346
AT3G15620	AT3G15620.1	Required for photorepair of 6-4 photoproducts in Arabidopsis thaliana.	protein_coding	UV REPAIR DEFECTIVE 3 (UVR3)	UV REPAIR DEFECTIVE 3 (UVR3)	1.20407	3.54827	4.30395	0.000109375	0.00233626	0.899919
AT1G55110	AT1G55110.1	indeterminate(ID)-domain 7 (IDD7); FUNCTIONS IN: sequence-specific DNA binding transcription factor activity, zinc ion binding, nucleic acid binding; INVOLVED IN: regulation of transcription; LOCATED IN: intracellular; EXPRESSED IN: 22 plant structures; EXPRESSED DURING: 13 growth stages; CONTAINS InterPro DOMAIN/s: Zinc finger, C2H2-like (InterPro:IPR015880), Zinc finger, C2H2-type (InterPro:IPR…	protein_coding	INDETERMINATE(ID)-DOMAIN 7 (IDD7)	INDETERMINATE(ID)-DOMAIN 7 (AtIDD7);INDETERMINATE(ID)-DOMAIN 7 (IDD7)	1.20183	4.57556	4.95928	1.43e-05	0.000547751	2.87225
AT1G07040	AT1G07040.1	unknown protein; INVOLVED IN: biological_process unknown; LOCATED IN: chloroplast; EXPRESSED IN: 24 plant structures; EXPRESSED DURING: 14 growth stages; BEST Arabidopsis thaliana protein match is: unknown protein (TAIR:AT1G27030.1); Has 540 Blast hits to 538 proteins in 187 species: Archae - 0; Bacteria - 333; Metazoa - 0; Fungi - 0; Plants - 67; Viruses - 0; Other Eukaryotes - 140 (source: NCBI…	protein_coding			1.1968	6.15712	3.92659	0.000341204	0.00521797	-0.167928
AT3G57450	AT3G57450.1	unknown protein; Has 65 Blast hits to 65 proteins in 11 species: Archae - 0; Bacteria - 0; Metazoa - 0; Fungi - 0; Plants - 65; Viruses - 0; Other Eukaryotes - 0 (source: NCBI BLink).	protein_coding			1.19621	5.54305	3.96916	0.000300601	0.00472321	-0.0724206
AT2G39570	AT2G39570.1	Encodes a ACT domain-containing protein. The ACT domain, named after bacterial aspartate kinase, chorismate mutase and TyrA (prephenate dehydrogenase), is a regulatory domain that serves as an amino acid-binding site in feedback-regulated amino acid metabolic enzymes.	protein_coding	ACT DOMAIN REPEATS 9 (ACR9)	ACT DOMAIN REPEATS 9 (ACR9)	1.19385	7.99428	3.5483	0.00102931	0.0114412	-1.12222
AT3G45610	AT3G45610.1	Dof-type zinc finger DNA-binding family protein; CONTAINS InterPro DOMAIN/s: Zinc finger, Dof-type (InterPro:IPR003851); BEST Arabidopsis thaliana protein match is: TARGET OF MONOPTEROS 6 (TAIR:AT5G60200.1); Has 1099 Blast hits to 1094 proteins in 58 species: Archae - 0; Bacteria - 0; Metazoa - 0; Fungi - 0; Plants - 1090; Viruses - 0; Other Eukaryotes - 9 (source: NCBI BLink).	protein_coding	DOF TRANSCRIPTION FACTOR 6 (DOF6)	DOF TRANSCRIPTION FACTOR 6 (DOF6)	1.19245	1.69851	5.33155	4.39e-06	0.000235741	4.16495
AT1G01720	AT1G01720.1	Belongs to a large family of putative transcriptional activators with NAC domain. Transcript level increases in response to wounding and abscisic acid. ATAF1 attentuates ABA signaling and sythesis. Mutants are hyposensitive to ABA.	protein_coding	(ATAF1)	(ATAF1);ARABIDOPSIS NAC DOMAIN CONTAINING PROTEIN 2 (ANAC002)	1.18285	5.52566	4.58143	4.65e-05	0.00130112	1.79969
AT4G19700	AT4G19700.1	Encodes BOI (Botrytis Susceptible 1 Interactor). Has E3 ubiquitin ligase activity. Interacts with and ubiquitinates BOS1 (Botrytis Susceptible 1). It prevents caspase activation and attenuates cell death.	protein_coding	(RING)	BOTRYTIS SUSCEPTIBLE1 INTERACTOR (BOI); (ATILP);IAP-LIKE PROTEIN (ILP); (RING)	1.18247	3.9482	4.38386	8.56e-05	0.00196072	1.21701
AT3G47430	AT3G47430.1	member of the peroxin11 (PEX11) gene family, located on the peroxisome membrane, controls peroxisome proliferation.	protein_coding	PEROXIN 11B (PEX11B)	PEROXIN 11B (PEX11B)	1.17856	2.25184	4.70217	3.2e-05	0.000988277	2.17747
AT4G24380	AT4G24380.1	INVOLVED IN: 10-formyltetrahydrofolate biosynthetic process, folic acid and derivative biosynthetic process; EXPRESSED IN: 24 plant structures; EXPRESSED DURING: 15 growth stages; CONTAINS InterPro DOMAIN/s: Serine hydrolase (InterPro:IPR005645); BEST Arabidopsis thaliana protein match is: alpha/beta-Hydrolases superfamily protein (TAIR:AT5G65400.1); Has 30201 Blast hits to 17322 proteins in 780 …	protein_coding			1.17812	2.92129	2.85015	0.0069499	0.0442168	-2.82028
AT1G60730	AT1G60730.3	NAD(P)-linked oxidoreductase superfamily protein; FUNCTIONS IN: oxidoreductase activity, aldo-keto reductase activity; INVOLVED IN: oxidation reduction; EXPRESSED IN: 7 plant structures; EXPRESSED DURING: LP.06 six leaves visible, LP.04 four leaves visible, 4 anthesis, petal differentiation and expansion stage; CONTAINS InterPro DOMAIN/s: Aldo/keto reductase (InterPro:IPR001395); BEST Arabidopsis…	protein_coding			1.1718	4.19765	3.5731	0.000958696	0.0108986	-1.02893
AT1G02620	AT1G02620.1	Ras-related small GTP-binding family protein; FUNCTIONS IN: GTP binding; INVOLVED IN: intracellular protein transport; LOCATED IN: endomembrane system, intracellular; CONTAINS InterPro DOMAIN/s: Small GTPase SAR1-type (InterPro:IPR006687), ARF/SAR superfamily (InterPro:IPR006689); BEST Arabidopsis thaliana protein match is: secretion-associated RAS super family 2 (TAIR:AT4G02080.1); Has 4733 Blas…	protein_coding			1.17088	-0.28744	3.24765	0.00239695	0.0209267	-1.58735
AT2G23910	AT2G23910.1	NAD(P)-binding Rossmann-fold superfamily protein; FUNCTIONS IN: coenzyme binding, binding, cinnamoyl-CoA reductase activity, catalytic activity; INVOLVED IN: lignin biosynthetic process, response to karrikin; LOCATED IN: cellular_component unknown; EXPRESSED IN: 19 plant structures; EXPRESSED DURING: 13 growth stages; CONTAINS InterPro DOMAIN/s: NAD-dependent epimerase/dehydratase (InterPro:IPR00…	protein_coding			1.16961	0.29957	3.81079	0.000480477	0.00660248	-0.156079
AT5G15240	AT5G15240.1	Transmembrane amino acid transporter family protein; CONTAINS InterPro DOMAIN/s: Amino acid transporter, transmembrane (InterPro:IPR013057); BEST Arabidopsis thaliana protein match is: Transmembrane amino acid transporter family protein (TAIR:AT3G28960.1); Has 5045 Blast hits to 4985 proteins in 317 species: Archae - 15; Bacteria - 153; Metazoa - 1796; Fungi - 1055; Plants - 1275; Viruses - 9; Ot…	protein_coding			1.16549	2.47481	3.06162	0.00397698	0.029776	-2.10082
AT5G48240	AT5G48240.3	unknown protein; FUNCTIONS IN: molecular_function unknown; INVOLVED IN: biological_process unknown; CONTAINS InterPro DOMAIN/s: Protein of unknown function DUF1665 (InterPro:IPR012459); Has 286 Blast hits to 283 proteins in 145 species: Archae - 0; Bacteria - 2; Metazoa - 103; Fungi - 97; Plants - 41; Viruses - 1; Other Eukaryotes - 42 (source: NCBI BLink).	protein_coding			1.16001	3.54017	7.39759	6.17e-09	1.96e-06	10.4143
AT5G16200	AT5G16200.1	50S ribosomal protein-related; BEST Arabidopsis thaliana protein match is: unknown protein (TAIR:AT1G66890.1); Has 1807 Blast hits to 1807 proteins in 277 species: Archae - 0; Bacteria - 0; Metazoa - 736; Fungi - 347; Plants - 385; Viruses - 0; Other Eukaryotes - 339 (source: NCBI BLink).	protein_coding			1.15762	0.947999	2.96973	0.00508067	0.0354886	-2.17762
AT1G25260	AT1G25260.1	Ribosomal protein L10 family protein; FUNCTIONS IN: structural constituent of ribosome; INVOLVED IN: translation, ribosome biogenesis; LOCATED IN: cytosolic ribosome, ribosome; EXPRESSED IN: 23 plant structures; EXPRESSED DURING: 13 growth stages; CONTAINS InterPro DOMAIN/s: Ribosomal protein L10 (InterPro:IPR001790); BEST Arabidopsis thaliana protein match is: Ribosomal protein L10 family protei…	protein_coding			1.15674	5.20305	7.45173	5.21e-09	1.79e-06	10.573
AT2G39650	AT2G39650.1	Protein of unknown function (DUF506) ; CONTAINS InterPro DOMAIN/s: Protein of unknown function DUF506, plant (InterPro:IPR006502); BEST Arabidopsis thaliana protein match is: Protein of unknown function (DUF506) (TAIR:AT2G38820.2); Has 395 Blast hits to 393 proteins in 24 species: Archae - 0; Bacteria - 0; Metazoa - 0; Fungi - 0; Plants - 393; Viruses - 0; Other Eukaryotes - 2 (source: NCBI BLink…	protein_coding			1.1496	3.01228	3.01154	0.00454694	0.0327857	-2.38268
AT3G54363	AT3G54363.1	This gene encodes a small protein and has either evidence of transcription or purifying selection.	protein_coding			1.14652	1.58623	3.40207	0.00155887	0.0154321	-1.16498
AT4G15910	AT4G15910.1	encodes a gene whose transcript level in root and leaves increases to progressive drought stress. The transcript level is also affected by changes of endogenous or exogenous abscisic acid level. It appears to be a member of plant-specific gene family that includes late embryo-abundant and zinc- IAA-induced proteins in other plants.	protein_coding	DROUGHT-INDUCED 21 (DI21)	DROUGHT-INDUCED 21 (DI21);DROUGHT-INDUCED 21 (ATDI21)	1.139	3.22203	3.4266	0.00145475	0.0146641	-1.28021
AT5G51970	AT5G51970.1	Encodes a putative sorbitol dehydrogenase that can be thiolated in vitro.	protein_coding			1.13721	7.34275	5.57749	2e-06	0.000127539	4.79172
AT2G29670	AT2G29670.1	Tetratricopeptide repeat (TPR)-like superfamily protein; FUNCTIONS IN: binding; LOCATED IN: chloroplast; EXPRESSED IN: 23 plant structures; EXPRESSED DURING: 15 growth stages; CONTAINS InterPro DOMAIN/s: Tetratricopeptide-like helical (InterPro:IPR011990), Tetratricopeptide repeat-containing (InterPro:IPR013026), Tetratricopeptide repeat (InterPro:IPR019734); BEST Arabidopsis thaliana protein mat…	protein_coding			1.13606	5.80186	4.58755	4.57e-05	0.00128303	1.82171
AT5G43500	AT5G43500.1	encodes a protein whose sequence is similar to actin-related proteins (ARPs) in other organisms. Member of nuclear ARP family of genes.	protein_coding	ACTIN-RELATED PROTEIN 9 (ARP9)	ACTIN-RELATED PROTEIN 9 (ARP9);ACTIN-RELATED PROTEIN 9 (ATARP9)	1.1314	4.53675	6.19829	2.76e-07	2.95e-05	6.70859
AT5G14580	AT5G14580.1	polyribonucleotide nucleotidyltransferase, putative; FUNCTIONS IN: polyribonucleotide nucleotidyltransferase activity, 3'-5'-exoribonuclease activity, RNA binding, nucleic acid binding; INVOLVED IN: mRNA catabolic process, RNA processing; LOCATED IN: mitochondrion; EXPRESSED IN: 16 plant structures; EXPRESSED DURING: 7 growth stages; CONTAINS InterPro DOMAIN/s: K Homology, type 1, subgroup (Inter…	protein_coding			1.13109	2.22722	3.48933	0.00121792	0.0129547	-1.10204
AT4G28390	AT4G28390.1	Encodes a mitochondrial ADP/ATP carrier protein. Shown in heterologous systems to be located in the plasma membrane. Has comparable affinity for ADP and ATP (in E.coli).	protein_coding	ADP/ATP CARRIER 3 (AAC3)	(ATAAC3);ADP/ATP CARRIER 3 (AAC3)	1.13013	3.21919	3.10696	0.00351972	0.0271604	-1.9779
AT4G21320	AT4G21320.1	Encodes heat-stress-associated 32-kD protein. Up-regulated by heat shock. Thermotolerance in a knockout mutant was compromised following a long recovery period (> 24 h) after acclimation heat shock treatment.	protein_coding	HEAT-STRESS-ASSOCIATED 32 (HSA32)	HEAT-STRESS-ASSOCIATED 32 (HSA32)	1.13002	2.23384	2.98761	0.00484558	0.0342883	-2.25992
AT1G63180	AT1G63180.1	Encodes a protein with UDP-D-glucose 4-epimerase activity. Involved in pollen development.	protein_coding	UDP-D-GLUCOSE/UDP-D-GALACTOSE 4-EPIMERASE 3 (UGE3)	UDP-D-GLUCOSE/UDP-D-GALACTOSE 4-EPIMERASE 3 (UGE3)	1.1174	4.83359	4.1632	0.0001678	0.00318275	0.488216
AT5G42780	AT5G42780.1	homeobox protein 27 (HB27); FUNCTIONS IN: DNA binding, sequence-specific DNA binding transcription factor activity; INVOLVED IN: regulation of transcription; LOCATED IN: cellular_component unknown; EXPRESSED IN: 16 plant structures; EXPRESSED DURING: 6 growth stages; CONTAINS InterPro DOMAIN/s: Homeobox domain, ZF-HD class (InterPro:IPR006455), ZF-HD homeobox protein, Cys/His-rich dimerisation do…	protein_coding	HOMEOBOX PROTEIN 27 (HB27)	ZINC FINGER HOMEODOMAIN 13 (ZHD13);HOMEOBOX PROTEIN 27 (AtHB27);HOMEOBOX PROTEIN 27 (HB27)	1.11571	0.91321	2.96589	0.00513256	0.0357797	-2.20087
AT2G33510	AT2G33510.2	unknown protein; INVOLVED IN: biological_process unknown; LOCATED IN: cellular_component unknown; BEST Arabidopsis thaliana protein match is: unknown protein (TAIR:AT1G28070.1).	protein_coding			1.11377	2.94891	4.82203	2.2e-05	0.000754898	2.53551
AT3G62650	AT3G62650.2	unknown protein; BEST Arabidopsis thaliana protein match is: unknown protein (TAIR:AT2G47485.1); Has 35333 Blast hits to 34131 proteins in 2444 species: Archae - 798; Bacteria - 22429; Metazoa - 974; Fungi - 991; Plants - 531; Viruses - 0; Other Eukaryotes - 9610 (source: NCBI BLink).	protein_coding			1.11355	6.54369	3.87609	0.000396307	0.00580688	-0.320903
AT3G56140	AT3G56140.1	Protein of unknown function (DUF399 and DUF3411); FUNCTIONS IN: molecular_function unknown; INVOLVED IN: biological_process unknown; LOCATED IN: chloroplast thylakoid lumen, chloroplast; EXPRESSED IN: 22 plant structures; EXPRESSED DURING: 13 growth stages; CONTAINS InterPro DOMAIN/s: Protein of unknown function DUF399 (InterPro:IPR007314), Protein of unknown function DUF3411 (InterPro:IPR021825)…	protein_coding			1.11344	6.38262	6.45007	1.23e-07	1.66e-05	7.49758
AT3G52800	AT3G52800.1	A20/AN1-like zinc finger family protein; FUNCTIONS IN: DNA binding, zinc ion binding; INVOLVED IN: response to chitin; LOCATED IN: cellular_component unknown; EXPRESSED IN: 23 plant structures; EXPRESSED DURING: 15 growth stages; CONTAINS InterPro DOMAIN/s: Zinc finger, AN1-type (InterPro:IPR000058), Zinc finger, A20-type (InterPro:IPR002653); BEST Arabidopsis thaliana protein match is: A20/AN1-l…	protein_coding			1.11343	6.65128	5.54989	2.19e-06	0.00013602	4.68636
AT3G51840	AT3G51840.1	Encodes a short-chain acyl-CoA oxidase, which catalyzes the first step of peroxisomal fatty acid beta-oxidation during early, post-germinative growth in oilseed species. Null mutants virtually lack short-chain acyl-CoA and are resistant to 2,4-dichlorophenoxybutyric acid, which is converted to the herbicide and auxin analogue 2,4-dichlorophenoxyacetic acid by beta-oxidation. Despite the almost co…	protein_coding	ACYL-COA OXIDASE 4 (ACX4)	(ATSCX); (ATG6);ACYL-COA OXIDASE 4 (ACX4)	1.11154	8.24336	5.52142	2.4e-06	0.000146781	4.64648
AT4G34881	AT4G34881.1	unknown protein; FUNCTIONS IN: molecular_function unknown; INVOLVED IN: biological_process unknown; LOCATED IN: endomembrane system; Has 30201 Blast hits to 17322 proteins in 780 species: Archae - 12; Bacteria - 1396; Metazoa - 17338; Fungi - 3422; Plants - 5037; Viruses - 0; Other Eukaryotes - 2996 (source: NCBI BLink).	protein_coding			1.11113	5.12745	3.19855	0.00274324	0.022852	-2.07533
AT5G09220	AT5G09220.1	member of AAAP family	protein_coding	AMINO ACID PERMEASE 2 (AAP2)	AMINO ACID PERMEASE 2 (AAP2)	1.10969	5.20768	3.17136	0.00295498	0.0240487	-2.13699
AT1G55510	AT1G55510.1	branched-chain alpha-keto acid decarboxylase E1 beta	protein_coding	BRANCHED-CHAIN ALPHA-KETO ACID DECARBOXYLASE E1 BETA SUBUNIT (BCDH BETA1)	BRANCHED-CHAIN ALPHA-KETO ACID DECARBOXYLASE E1 BETA SUBUNIT (BCDH BETA1)	1.10956	5.27499	3.26495	0.00228516	0.0202027	-1.99065
AT2G38820	AT2G38820.2	Protein of unknown function (DUF506) ; CONTAINS InterPro DOMAIN/s: Protein of unknown function DUF506, plant (InterPro:IPR006502); BEST Arabidopsis thaliana protein match is: Protein of unknown function (DUF506) (TAIR:AT3G22970.1); Has 35333 Blast hits to 34131 proteins in 2444 species: Archae - 798; Bacteria - 22429; Metazoa - 974; Fungi - 991; Plants - 531; Viruses - 0; Other Eukaryotes - 9610 …	protein_coding			1.1081	4.82931	3.94572	0.00032234	0.00498393	-0.136242
AT1G05560	AT1G05560.1	A UDP-glucose transferase localized in the phragmoplast. It has been co-purified with the callose synthase complex and may transfer UDP-glucose from sucrose synthase to the callose synthase and thus help form a substrate channel for the synthesis of callose at the forming cell plate. Induced by salicylic acid. Independent of NPR1 for their induction by salicylic acid. UGT1 encodes a protein with …	protein_coding	UDP-GLUCOSYLTRANSFERASE 75B1 (UGT75B1)	UDP-GLUCOSYLTRANSFERASE 75B1 (UGT75B1);UDP-GLUCOSE TRANSFERASE 1 (UGT1)	1.10715	5.05318	3.61026	0.000861509	0.0101	-1.01708
AT5G04770	AT5G04770.1	Encodes a member of the cationic amino acid transporter (CAT) subfamily of amino acid polyamine choline transporters. Does not mediate efficient uptake of basic amino acids in yeast or Xenopus systems but can transport neutral and acidic amino acid analogs. Expressed in sink tissues. Induced during infestation of roots by the plant parasitic root-knot nematode, Meloidogyne incognita. Localized in…	protein_coding	CATIONIC AMINO ACID TRANSPORTER 6 (CAT6)	CATIONIC AMINO ACID TRANSPORTER 6 (CAT6);ARABIDOPSIS THALIANA CATIONIC AMINO ACID TRANSPORTER 6 (ATCAT6)	1.10619	4.35622	4.23502	0.000134949	0.00272434	0.911989
AT5G58370	AT5G58370.2	P-loop containing nucleoside triphosphate hydrolases superfamily protein; FUNCTIONS IN: GTP binding; INVOLVED IN: barrier septum formation; LOCATED IN: intracellular; EXPRESSED IN: 21 plant structures; EXPRESSED DURING: 13 growth stages; CONTAINS InterPro DOMAIN/s: GTP-binding protein, HSR1-related (InterPro:IPR002917), GTP-binding protein, ribosome biogenesis, YsxC (InterPro:IPR019987); BEST Ara…	protein_coding			1.09975	3.82463	4.72717	2.96e-05	0.000931938	2.20966
AT5G10150	AT5G10150.1	FUNCTIONS IN: molecular_function unknown; INVOLVED IN: biological_process unknown; LOCATED IN: cellular_component unknown; EXPRESSED IN: cultured cell; CONTAINS InterPro DOMAIN/s: Protein of unknown function DUF966 (InterPro:IPR010369), Uncharacterised conserved protein UCP031043 (InterPro:IPR021182); BEST Arabidopsis thaliana protein match is: Domain of unknown function (DUF966) (TAIR:AT5G59790.…	protein_coding			1.09849	2.69624	3.87613	0.000396261	0.00580688	-0.306717
AT5G41400	AT5G41400.1	RING/U-box superfamily protein; FUNCTIONS IN: zinc ion binding; LOCATED IN: endomembrane system; EXPRESSED IN: 17 plant structures; EXPRESSED DURING: 8 growth stages; CONTAINS InterPro DOMAIN/s: Zinc finger, RING-type (InterPro:IPR001841), Zinc finger, C3HC4 RING-type (InterPro:IPR018957); BEST Arabidopsis thaliana protein match is: RING/U-box superfamily protein (TAIR:AT1G63840.1); Has 1807 Blas…	protein_coding			1.0982	3.04589	3.89594	0.000373686	0.00556475	0.0805377
AT5G02150	AT5G02150.1	Encodes one of the Arabidopsis orthologs of the human Hsp70-binding protein 1 (HspBP-1) and yeast Fes1p: Fes1A (AT3G09350), Fes1B (AT3G53800), Fes1C (AT5G02150).	protein_coding	FES1C (Fes1C)	FES1C (Fes1C)	1.09788	3.9153	6.14458	3.27e-07	3.39e-05	6.53058
AT3G16720	AT3G16720.1	RING-H2 protein induced after exposure to chitin or inactivated crude cellulase preparations.	protein_coding	TOXICOS EN LEVADURA 2 (ATL2)	TOXICOS EN LEVADURA 2 (ATL2);TOXICOS EN LEVADURA 2 (TL2)	1.0965	4.65285	3.23525	0.00248025	0.0214048	-2.04181
AT3G48380	AT3G48380.3	Peptidase C78, ubiquitin fold modifier-specific peptidase 1/ 2; FUNCTIONS IN: molecular_function unknown; INVOLVED IN: biological_process unknown; LOCATED IN: cellular_component unknown; CONTAINS InterPro DOMAIN/s: Peptidase C78, ubiquitin fold modifier-specific peptidase 1/ 2 (InterPro:IPR012462).	protein_coding			1.09618	5.68181	5.7791	1.05e-06	8.16e-05	5.39224
AT4G37300	AT4G37300.1	maternal effect embryo arrest 59 (MEE59); Has 70 Blast hits to 70 proteins in 15 species: Archae - 0; Bacteria - 0; Metazoa - 0; Fungi - 0; Plants - 70; Viruses - 0; Other Eukaryotes - 0 (source: NCBI BLink).	protein_coding	MATERNAL EFFECT EMBRYO ARREST 59 (MEE59)	MATERNAL EFFECT EMBRYO ARREST 59 (MEE59)	1.0928	6.77592	3.19518	0.00276874	0.0229875	-2.09131
AT1G27360	AT1G27360.1	In conjunction with SPL10 and SPL2, SPL11 redundantly controls proper development of lateral organs in association with shoot maturation in the reproductive phase.	protein_coding	SQUAMOSA PROMOTER-LIKE 11 (SPL11)	SQUAMOSA PROMOTER-LIKE 11 (SPL11)	1.09123	1.76808	3.06246	0.00396807	0.0297268	-2.04776
AT3G07650	AT3G07650.1	This gene belongs to the CO (CONSTANS) gene family. This gene family is divided in three subgroups: groups III, to which COL9 belongs, is characterised by one B-box (supposed to regulate protein-protein interactions) and a second diverged zinc finger. COL9 downregulates expression of CO (CONSTANS) as well as FT and SOC1 which are known regulatory targets of CO.	protein_coding	CONSTANS-LIKE 9 (COL9)	CONSTANS-LIKE 9 (COL9)	1.09023	5.40908	5.02216	1.17e-05	0.000472552	3.09703
AT3G20250	AT3G20250.1	Encodes a member of the Arabidopsis Pumilio (APUM) proteins containing PUF domain (eight repeats of approximately 36 amino acids each). PUF proteins regulate both mRNA stability and translation through sequence-specific binding to the 3' UTR of target mRNA transcripts.	protein_coding	PUMILIO 5 (PUM5)	PUMILIO 5 (APUM5);PUMILIO 5 (PUM5)	1.08327	6.02778	4.19328	0.000153188	0.0029645	0.602908
AT1G10682	AT1G10682.1	other RNA	other_rna			1.0826	5.98186	3.51254	0.00114005	0.0123743	-1.33994
AT1G01180	AT1G01180.1	S-adenosyl-L-methionine-dependent methyltransferases superfamily protein; FUNCTIONS IN: methyltransferase activity; INVOLVED IN: lipid biosynthetic process; EXPRESSED IN: sperm cell, hypocotyl; CONTAINS InterPro DOMAIN/s: Rhamnosyl O-methyltransferase/Cephalosporin hydroxylase (InterPro:IPR007072); Has 274 Blast hits to 274 proteins in 51 species: Archae - 0; Bacteria - 75; Metazoa - 2; Fungi - 0…	protein_coding			1.08069	3.99551	4.28078	0.000117389	0.00244524	1.00066
AT3G07870	AT3G07870.1	F-box and associated interaction domains-containing protein; CONTAINS InterPro DOMAIN/s: F-box domain, cyclin-like (InterPro:IPR001810), F-box domain, Skp2-like (InterPro:IPR022364), F-box associated domain, type 3 (InterPro:IPR013187), F-box associated interaction domain (InterPro:IPR017451); BEST Arabidopsis thaliana protein match is: F-box and associated interaction domains-containing protein …	protein_coding			1.07791	4.11969	4.55666	5.02e-05	0.00137918	1.67137
AT3G19100	AT3G19100.1	Protein kinase superfamily protein; FUNCTIONS IN: in 6 functions; INVOLVED IN: protein amino acid phosphorylation, N-terminal protein myristoylation; LOCATED IN: plasma membrane; EXPRESSED IN: 22 plant structures; EXPRESSED DURING: 13 growth stages; CONTAINS InterPro DOMAIN/s: Protein kinase, ATP binding site (InterPro:IPR017441), Protein kinase, catalytic domain (InterPro:IPR000719), Serine/thre…	protein_coding			1.07506	5.63051	5.92894	6.52e-07	5.88e-05	5.85783
AT2G22850	AT2G22850.1	basic leucine-zipper 6 (bZIP6); FUNCTIONS IN: DNA binding, sequence-specific DNA binding transcription factor activity; INVOLVED IN: regulation of transcription, DNA-dependent; LOCATED IN: nucleus; EXPRESSED IN: 24 plant structures; EXPRESSED DURING: 12 growth stages; CONTAINS InterPro DOMAIN/s: Basic-leucine zipper (bZIP) transcription factor (InterPro:IPR004827), bZIP transcription factor, bZIP…	protein_coding	BASIC LEUCINE-ZIPPER 6 (bZIP6)	BASIC LEUCINE-ZIPPER 6 (AtbZIP6);BASIC LEUCINE-ZIPPER 6 (bZIP6)	1.074	1.27391	3.00148	0.00467034	0.0334344	-2.15985
AT5G42900	AT5G42900.1	cold regulated gene 27 (COR27); BEST Arabidopsis thaliana protein match is: unknown protein (TAIR:AT4G33980.1); Has 74 Blast hits to 74 proteins in 12 species: Archae - 0; Bacteria - 0; Metazoa - 0; Fungi - 0; Plants - 74; Viruses - 0; Other Eukaryotes - 0 (source: NCBI BLink).	protein_coding	COLD REGULATED GENE 27 (COR27)	COLD REGULATED GENE 27 (COR27)	1.06956	4.59965	2.95107	0.00533748	0.0367446	-2.67349
AT5G45660	AT5G45660.1	unknown protein; FUNCTIONS IN: molecular_function unknown; INVOLVED IN: biological_process unknown; LOCATED IN: endomembrane system; Has 35333 Blast hits to 34131 proteins in 2444 species: Archae - 798; Bacteria - 22429; Metazoa - 974; Fungi - 991; Plants - 531; Viruses - 0; Other Eukaryotes - 9610 (source: NCBI BLink).	protein_coding			1.06886	2.9653	6.26924	2.2e-07	2.49e-05	6.99652
AT3G09190	AT3G09190.1	Regulates flowering time in Ws ecotype.	protein_coding			1.06834	1.43063	3.36304	0.00173938	0.0167761	-1.26213
AT1G15830	AT1G15830.1	unknown protein; Has 165982 Blast hits to 57214 proteins in 2459 species: Archae - 263; Bacteria - 44622; Metazoa - 55751; Fungi - 10656; Plants - 17613; Viruses - 2527; Other Eukaryotes - 34550 (source: NCBI BLink).	protein_coding			1.06507	1.50359	3.32888	0.00191353	0.0178889	-1.62925
AT5G28050	AT5G28050.2	Cytidine/deoxycytidylate deaminase family protein; FUNCTIONS IN: hydrolase activity, zinc ion binding, catalytic activity; LOCATED IN: cellular_component unknown; EXPRESSED IN: 24 plant structures; EXPRESSED DURING: 15 growth stages; CONTAINS InterPro DOMAIN/s: APOBEC/CMP deaminase, zinc-binding (InterPro:IPR016192), CMP/dCMP deaminase, zinc-binding (InterPro:IPR002125), Cytidine deaminase-like (…	protein_coding			1.06099	6.85551	3.78375	0.000520183	0.00701946	-0.558389
AT3G14750	AT3G14750.1	unknown protein; BEST Arabidopsis thaliana protein match is: unknown protein (TAIR:AT1G67170.1); Has 4036 Blast hits to 3091 proteins in 519 species: Archae - 61; Bacteria - 669; Metazoa - 1503; Fungi - 255; Plants - 421; Viruses - 4; Other Eukaryotes - 1123 (source: NCBI BLink).	protein_coding			1.06073	3.24308	7.07447	1.7e-08	4.02e-06	9.44947
AT1G28260	AT1G28260.1	Telomerase activating protein Est1; CONTAINS InterPro DOMAIN/s: Telomerase activating protein Est1 (InterPro:IPR019458); BEST Arabidopsis thaliana protein match is: Telomerase activating protein Est1 (TAIR:AT5G19400.2); Has 490 Blast hits to 489 proteins in 126 species: Archae - 0; Bacteria - 0; Metazoa - 280; Fungi - 120; Plants - 68; Viruses - 0; Other Eukaryotes - 22 (source: NCBI BLink).	protein_coding			1.05944	5.60942	3.81619	0.000472902	0.00654551	-0.506359
AT5G25130	AT5G25130.1	putative cytochrome P450	protein_coding	"CYTOCHROME P450, FAMILY 71, SUBFAMILY B, POLYPEPTIDE 12" (CYP71B12)	"CYTOCHROME P450, FAMILY 71, SUBFAMILY B, POLYPEPTIDE 12" (CYP71B12)	1.05332	0.478786	3.07463	0.00384037	0.0289954	-2.19779
AT3G29180	AT3G29180.1	Protein of unknown function (DUF1336); FUNCTIONS IN: molecular_function unknown; INVOLVED IN: N-terminal protein myristoylation; LOCATED IN: plasma membrane; EXPRESSED IN: 24 plant structures; EXPRESSED DURING: 15 growth stages; CONTAINS InterPro DOMAIN/s: Protein of unknown function DUF1336 (InterPro:IPR009769); BEST Arabidopsis thaliana protein match is: Protein of unknown function (DUF1336) (T…	protein_coding			1.04981	6.03108	5.7619	1.11e-06	8.53e-05	5.33613
AT3G55610	AT3G55610.1	encodes delta 1-pyrroline-5-carboxylate synthetase B. Gene expression is induced by dehydration, high salt and ABA. Knock-out mutations in P5CS2 are embryo-lethal. P5CS2 appears to be present in different cells and/or different subcellular locations from P5CS1 in a tissue-dependent manner.	protein_coding	DELTA 1-PYRROLINE-5-CARBOXYLATE SYNTHASE 2 (P5CS2)	DELTA 1-PYRROLINE-5-CARBOXYLATE SYNTHASE 2 (P5CS2)	1.04892	7.7249	6.44681	1.25e-07	1.67e-05	7.49714
AT2G16650	AT2G16650.1	Encodes a proteinaceous RNase P that supports RNase P activity in vivo in both organelles and the nucleus. It is also involved in the maturation of small nucleolar RNA (snoRNA) and mRNA.	protein_coding	PROTEINACEOUS RNASE P 2 (PRORP2)	PROTEINACEOUS RNASE P 2 (PRORP2)	1.0485	3.51612	7.13861	1.39e-08	3.52e-06	9.63295
AT5G27920	AT5G27920.1	F-box family protein; CONTAINS InterPro DOMAIN/s: Leucine-rich repeat, cysteine-containing subtype (InterPro:IPR006553); BEST Arabidopsis thaliana protein match is: RNI-like superfamily protein (TAIR:AT5G01720.1); Has 30201 Blast hits to 17322 proteins in 780 species: Archae - 12; Bacteria - 1396; Metazoa - 17338; Fungi - 3422; Plants - 5037; Viruses - 0; Other Eukaryotes - 2996 (source: NCBI BLi…	protein_coding			1.04424	5.75743	3.55902	0.000998191	0.0111961	-1.21472
AT3G13810	AT3G13810.2	indeterminate(ID)-domain 11 (IDD11); FUNCTIONS IN: sequence-specific DNA binding transcription factor activity, zinc ion binding, nucleic acid binding; INVOLVED IN: regulation of transcription; LOCATED IN: intracellular; EXPRESSED IN: 20 plant structures; EXPRESSED DURING: 9 growth stages; CONTAINS InterPro DOMAIN/s: Zinc finger, C2H2-like (InterPro:IPR015880), Zinc finger, C2H2-type (InterPro:IP…	protein_coding	INDETERMINATE(ID)-DOMAIN 11 (IDD11)	INDETERMINATE(ID)-DOMAIN 11 (IDD11)	1.04346	4.02363	4.17518	0.000161823	0.00309736	0.704317
AT3G20440	AT3G20440.2	BE1 ia a putative glycoside hydrolase. It plays vital roles during embryogenesis and in carbohydrate metabolism. Mutation in BE1 has pleotrophic effect on the whole plant development.	protein_coding	EMBRYO DEFECTIVE 2729 (EMB2729)	BRANCHING ENZYME 1 (BE1);EMBRYO DEFECTIVE 2729 (EMB2729)	1.04163	3.21719	2.83637	0.00720243	0.0455373	-3.05426
AT1G45976	AT1G45976.1	S-ribonuclease binding protein 1 (SBP1); FUNCTIONS IN: zinc ion binding; INVOLVED IN: biological_process unknown; LOCATED IN: cellular_component unknown; EXPRESSED IN: 24 plant structures; EXPRESSED DURING: 15 growth stages; CONTAINS InterPro DOMAIN/s: Zinc finger, RING-type (InterPro:IPR001841), S-ribonuclease binding protein, SBP1, pollen (InterPro:IPR017066); BEST Arabidopsis thaliana protein …	protein_coding	S-RIBONUCLEASE BINDING PROTEIN 1 (SBP1)	S-RIBONUCLEASE BINDING PROTEIN 1 (SBP1)	1.03922	4.87274	4.21648	0.000142772	0.00280809	0.656944
AT4G12690	AT4G12690.1	Plant protein of unknown function (DUF868); CONTAINS InterPro DOMAIN/s: Protein of unknown function DUF868, plant (InterPro:IPR008586); BEST Arabidopsis thaliana protein match is: Plant protein of unknown function (DUF868) (TAIR:AT2G04220.1); Has 288 Blast hits to 286 proteins in 16 species: Archae - 0; Bacteria - 0; Metazoa - 0; Fungi - 0; Plants - 288; Viruses - 0; Other Eukaryotes - 0 (source:…	protein_coding			1.03912	3.96824	3.73111	0.000606792	0.00788416	-0.640378
AT3G49950	AT3G49950.1	GRAS family transcription factor; CONTAINS InterPro DOMAIN/s: Transcription factor GRAS (InterPro:IPR005202); BEST Arabidopsis thaliana protein match is: GRAS family transcription factor (TAIR:AT5G67411.1); Has 2188 Blast hits to 2164 proteins in 278 species: Archae - 0; Bacteria - 2; Metazoa - 0; Fungi - 0; Plants - 2186; Viruses - 0; Other Eukaryotes - 0 (source: NCBI BLink).	protein_coding			1.03663	-0.209365	2.82169	0.00748081	0.0467858	-2.54848
AT5G02830	AT5G02830.1	Tetratricopeptide repeat (TPR)-like superfamily protein; INVOLVED IN: biological_process unknown; LOCATED IN: chloroplast; EXPRESSED IN: 22 plant structures; EXPRESSED DURING: 13 growth stages; CONTAINS InterPro DOMAIN/s: Pentatricopeptide repeat (InterPro:IPR002885); BEST Arabidopsis thaliana protein match is: Pentatricopeptide repeat (PPR-like) superfamily protein (TAIR:AT1G09900.1); Has 31969 …	protein_coding			1.03151	4.24943	4.76957	2.59e-05	0.00084968	2.28321
AT4G19160	AT4G19160.2	unknown protein; Has 35333 Blast hits to 34131 proteins in 2444 species: Archae - 798; Bacteria - 22429; Metazoa - 974; Fungi - 991; Plants - 531; Viruses - 0; Other Eukaryotes - 9610 (source: NCBI BLink).	protein_coding			1.02962	8.33454	5.47864	2.75e-06	0.0001644	4.52164
AT5G24580	AT5G24580.1	Heavy metal transport/detoxification superfamily protein ; FUNCTIONS IN: copper ion binding, metal ion binding; INVOLVED IN: copper ion transport, metal ion transport; LOCATED IN: cellular_component unknown; EXPRESSED IN: 20 plant structures; EXPRESSED DURING: 13 growth stages; CONTAINS InterPro DOMAIN/s: Heavy metal transport/detoxification protein (InterPro:IPR006121); BEST Arabidopsis thaliana…	protein_coding			1.0296	3.30401	3.29936	0.00207735	0.0189397	-1.74266
AT5G23380	AT5G23380.1	Protein of unknown function (DUF789); FUNCTIONS IN: molecular_function unknown; INVOLVED IN: biological_process unknown; LOCATED IN: membrane; EXPRESSED IN: 15 plant structures; EXPRESSED DURING: M germinated pollen stage, 4 anthesis, petal differentiation and expansion stage, E expanded cotyledon stage, D bilateral stage; CONTAINS InterPro DOMAIN/s: Protein of unknown function DUF789 (InterPro:I…	protein_coding			1.02489	4.25447	6.26041	2.26e-07	2.53e-05	6.9182
AT2G34900	AT2G34900.1	Encodes a member of the BET subgroup of bromodomain proteins, a novel class of putative transcription factors. Its expression is induced during seed imbibition and downregulated during germination. Seeds of a loss-of-function mutant allele, imb1, show impaired cotyledon greening during germination in abscisic acid (ABA) and express higher levels of ABI5 protein than the wild type. Moreover, imb1 …	protein_coding	IMBIBITION-INDUCIBLE 1 (IMB1)	GLOBAL TRANSCRIPTION FACTOR GROUP E1 (GTE1);IMBIBITION-INDUCIBLE 1 (IMB1); (GTE01)	1.02225	3.90908	4.0744	0.000219352	0.00380163	0.253066
AT2G39830	AT2G39830.1	Essential for early phloem development and function, and for root system development.	protein_coding	DA1-RELATED PROTEIN 2 (DAR2)	DA1-RELATED PROTEIN 2 (DAR2);LATERAL ROOT DEVELOPMENT 3 (LRD3)	1.0198	2.21994	4.09251	0.000207716	0.00366651	0.600851
AT2G35820	AT2G35820.1	ureidoglycolate hydrolases; FUNCTIONS IN: ureidoglycolate hydrolase activity; INVOLVED IN: allantoin catabolic process; LOCATED IN: cellular_component unknown; EXPRESSED IN: 17 plant structures; EXPRESSED DURING: 13 growth stages; CONTAINS InterPro DOMAIN/s: Ureidoglycolate hydrolase (InterPro:IPR007247); BEST Arabidopsis thaliana protein match is: unknown protein (TAIR:AT2G35810.1); Has 155 Blas…	protein_coding			1.01925	3.67397	4.07054	0.000221909	0.00382268	0.234657
AT2G03240	AT2G03240.1	EXS (ERD1/XPR1/SYG1) family protein; LOCATED IN: integral to membrane; EXPRESSED IN: 18 plant structures; EXPRESSED DURING: 10 growth stages; CONTAINS InterPro DOMAIN/s: SPX, N-terminal (InterPro:IPR004331), EXS, C-terminal (InterPro:IPR004342); BEST Arabidopsis thaliana protein match is: EXS (ERD1/XPR1/SYG1) family protein (TAIR:AT1G14040.1); Has 1164 Blast hits to 1104 proteins in 198 species: …	protein_coding			1.0104	5.48939	3.40089	0.00156405	0.0154543	-1.60247
AT2G42290	AT2G42290.1	Leucine-rich repeat protein kinase family protein; FUNCTIONS IN: protein serine/threonine kinase activity, kinase activity, ATP binding; INVOLVED IN: transmembrane receptor protein tyrosine kinase signaling pathway, protein amino acid phosphorylation; LOCATED IN: endomembrane system; EXPRESSED IN: 15 plant structures; EXPRESSED DURING: 6 growth stages; CONTAINS InterPro DOMAIN/s: Protein kinase, …	protein_coding			1.0088	2.81991	5.87479	7.76e-07	6.65e-05	5.79302
AT4G32920	AT4G32920.1	glycine-rich protein; FUNCTIONS IN: molecular_function unknown; INVOLVED IN: biological_process unknown; LOCATED IN: vacuole; EXPRESSED IN: 21 plant structures; EXPRESSED DURING: 11 growth stages; BEST Arabidopsis thaliana protein match is: unknown protein (TAIR:AT5G11700.1); Has 30201 Blast hits to 17322 proteins in 780 species: Archae - 12; Bacteria - 1396; Metazoa - 17338; Fungi - 3422; Plants…	protein_coding			1.00867	4.62628	4.51198	5.77e-05	0.00150879	1.57481
AT1G04280	AT1G04280.1	P-loop containing nucleoside triphosphate hydrolases superfamily protein; FUNCTIONS IN: ATP binding; INVOLVED IN: cell killing; LOCATED IN: membrane; EXPRESSED IN: leaf; CONTAINS InterPro DOMAIN/s: Zeta toxin (InterPro:IPR010488); BEST Arabidopsis thaliana protein match is: P-loop containing nucleoside triphosphate hydrolases superfamily protein (TAIR:AT1G06750.2); Has 195 Blast hits to 194 prote…	protein_coding			1.00831	5.43445	5.33984	4.28e-06	0.000230191	4.02587
AT5G02840	AT5G02840.1	CCA1 and LHY colocalize in the nucleus and form heterodimers in vivo. CCA1 and LHY function synergistically in regulating circadian rhythms of Arabidopsis.	protein_coding	LHY/CCA1-LIKE 1 (LCL1)	LHY/CCA1-LIKE 1 (LCL1)	1.00716	6.45278	4.73929	2.85e-05	0.000909599	2.19096
AT2G26980	AT2G26980.4	encodes a serine-threonine protein kinase whose expression increases in response to abscisic acid, cold, drought, high salt, and wounding conditions. The gene is expressed in developing seeds and seedlings. Lines carrying a T-DNA insertions have reduced germination efficiency and expression of cold, high-salt, and abscisic acid marker genes are altered, but not drought-response markers.	protein_coding	CBL-INTERACTING PROTEIN KINASE 3 (CIPK3)	CBL-INTERACTING PROTEIN KINASE 3 (CIPK3)	1.00431	6.31559	3.89345	0.000376457	0.00559015	-0.28649
AT1G03610	AT1G03610.1	Protein of unknown function (DUF789); CONTAINS InterPro DOMAIN/s: Protein of unknown function DUF789 (InterPro:IPR008507); BEST Arabidopsis thaliana protein match is: Protein of unknown function (DUF789) (TAIR:AT4G03420.1); Has 266 Blast hits to 262 proteins in 19 species: Archae - 0; Bacteria - 0; Metazoa - 0; Fungi - 0; Plants - 263; Viruses - 0; Other Eukaryotes - 3 (source: NCBI BLink).	protein_coding			1.00348	5.8891	4.0625	0.000227338	0.00387869	0.191623
AT1G03760	AT1G03760.1	Prefoldin chaperone subunit family protein; FUNCTIONS IN: unfolded protein binding; INVOLVED IN: protein folding; LOCATED IN: prefoldin complex; EXPRESSED IN: pollen tube; CONTAINS InterPro DOMAIN/s: Prefoldin alpha-like (InterPro:IPR004127), Prefoldin (InterPro:IPR009053); Has 429 Blast hits to 422 proteins in 142 species: Archae - 27; Bacteria - 8; Metazoa - 215; Fungi - 17; Plants - 37; Viruse…	protein_coding			1.00293	2.97589	5.21674	6.32e-06	0.000308691	3.73132
AT2G23320	AT2G23320.1	Encodes WRKY DNA-binding protein 15 (WRKY15).	protein_coding	WRKY DNA-BINDING PROTEIN 15 (WRKY15)	WRKY DNA-BINDING PROTEIN 15 (WRKY15)	1.00111	6.00736	4.06162	0.000227937	0.00388473	0.201383
AT4G08850	AT4G08850.1	Leucine-rich repeat receptor-like protein kinase family protein; FUNCTIONS IN: kinase activity; INVOLVED IN: protein amino acid phosphorylation; LOCATED IN: plasma membrane, membrane; EXPRESSED IN: 23 plant structures; EXPRESSED DURING: 13 growth stages; CONTAINS InterPro DOMAIN/s: Protein kinase, ATP binding site (InterPro:IPR017441), Serine/threonine-protein kinase domain (InterPro:IPR002290), …	protein_coding			-1.00022	6.5343	-3.54387	0.00104247	0.0115507	-1.25258
AT4G11370	AT4G11370.1	Encodes a putative RING-H2 finger protein RHA1a.	protein_coding	RING-H2 FINGER A1A (RHA1A)	RING-H2 FINGER A1A (RHA1A)	-1.00038	1.21751	-3.18008	0.00288543	0.0236292	-1.72168
AT3G56440	AT3G56440.1	homolog of yeast autophagy 18 (ATG18) D (ATG18D); CONTAINS InterPro DOMAIN/s: WD40 repeat-like-containing domain (InterPro:IPR011046), WD40 repeat (InterPro:IPR001680), WD40/YVTN repeat-like-containing domain (InterPro:IPR015943), WD40 repeat, subgroup (InterPro:IPR019781); BEST Arabidopsis thaliana protein match is: homolog of yeast autophagy 18C (TAIR:AT2G40810.2); Has 1451 Blast hits to 1383 p…	protein_coding	HOMOLOG OF YEAST AUTOPHAGY 18 (ATG18) D (ATG18D)	HOMOLOG OF YEAST AUTOPHAGY 18 (ATG18) D (ATG18D);HOMOLOG OF YEAST AUTOPHAGY 18 (ATG18) D (ATATG18D)	-1.00108	2.25989	-3.6292	0.000815697	0.00976722	-0.669935
AT5G62220	AT5G62220.1	Encodes a Golgi apparatus-localized galactosyltransferase involved in galactosyl-substitution of xyloglucan at position 2.	protein_coding	GLYCOSYLTRANSFERASE 18 (GT18)	XYLOGLUCAN L-SIDE CHAIN GALACTOSYLTRANSFERASE POSITION 2 (XLT2);GLYCOSYLTRANSFERASE 18 (GT18);GLYCOSYLTRANSFERASE 18 (ATGT18)	-1.0025	3.52892	-3.76203	0.000554376	0.00738594	-0.556601
AT3G51160	AT3G51160.1	Catalyzes the first step in the de novo synthesis of GDP-L-fucose.	protein_coding	MURUS 1 (MUR1)	GDP-D-MANNOSE-4,6-DEHYDRATASE 2 (GMD2);MURUS 1 (MUR_1);MURUS 1 (MUR1)	-1.00299	5.54136	-7.51067	4.33e-09	1.57e-06	10.754
AT4G12400	AT4G12400.2	Encodes one of the 36 carboxylate clamp (CC)-tetratricopeptide repeat (TPR) proteins (Prasad 2010, Pubmed ID: 20856808) with potential to interact with Hsp90/Hsp70 as co-chaperones.	protein_coding	HOP3 (Hop3)	HOP3 (Hop3)	-1.00446	3.01555	-2.85913	0.0067898	0.0435289	-2.60508
AT1G24150	AT1G24150.1	Encodes a group I formin. Localized to cell junctions. Polymerizes actin. Binds profilin.	protein_coding	FORMIN HOMOLOGUE 4 (FH4)	FORMIN HOMOLOGUE 4 (ATFH4);FORMIN HOMOLOGUE 4 (FH4)	-1.00536	3.21173	-3.60339	0.000878743	0.0102401	-0.843444
AT1G12570	AT1G12570.1	Glucose-methanol-choline (GMC) oxidoreductase family protein; FUNCTIONS IN: aldehyde-lyase activity, oxidoreductase activity, acting on CH-OH group of donors, FAD binding; INVOLVED IN: alcohol metabolic process; LOCATED IN: endomembrane system; EXPRESSED IN: 17 plant structures; EXPRESSED DURING: 9 growth stages; CONTAINS InterPro DOMAIN/s: Glucose-methanol-choline oxidoreductase, N-terminal (Int…	protein_coding			-1.00563	-2.2761	-2.99978	0.00469151	0.0335288	-2.15943
AT5G02180	AT5G02180.1	Transmembrane amino acid transporter family protein; FUNCTIONS IN: amino acid transmembrane transporter activity; INVOLVED IN: amino acid transport; LOCATED IN: chloroplast, membrane; EXPRESSED IN: 18 plant structures; EXPRESSED DURING: 12 growth stages; CONTAINS InterPro DOMAIN/s: Amino acid transporter, transmembrane (InterPro:IPR013057); BEST Arabidopsis thaliana protein match is: Transmembran…	protein_coding			-1.00639	2.38454	-3.05617	0.00403559	0.0300825	-2.33903
AT5G14230	AT5G14230.1	CONTAINS InterPro DOMAIN/s: Ankyrin repeat-containing domain (InterPro:IPR020683), Ankyrin repeat (InterPro:IPR002110); BEST Arabidopsis thaliana protein match is: XB3 ortholog 2 in Arabidopsis thaliana (TAIR:AT5G57740.1); Has 66374 Blast hits to 25358 proteins in 1201 species: Archae - 121; Bacteria - 8133; Metazoa - 29530; Fungi - 5885; Plants - 3349; Viruses - 785; Other Eukaryotes - 18571 (so…	protein_coding			-1.0069	3.0006	-3.16639	0.00299527	0.0242825	-1.94114
AT2G17480	AT2G17480.1	A member of a large family of seven-transmembrane domain proteins specific to plants, homologs of the barley mildew resistance locus o (MLO) protein. The Arabidopsis genome contains 15 genes encoding MLO proteins, with localization in plasma membrane. Phylogenetic analysis revealed four clades of closely-related AtMLO genes. ATMLO8 belongs to the clade III, with AtMLO5, AtMLO7, AtMLO9, and AtMLO1…	protein_coding	MILDEW RESISTANCE LOCUS O 8 (MLO8)	MILDEW RESISTANCE LOCUS O 8 (MLO8);MILDEW RESISTANCE LOCUS O 8 (ATMLO8)	-1.00742	5.1811	-4.11175	0.000196017	0.00352471	0.357696
AT3G59310	AT3G59310.2	Eukaryotic protein of unknown function (DUF914); CONTAINS InterPro DOMAIN/s: Protein of unknown function DUF914, eukaryotic (InterPro:IPR009262); BEST Arabidopsis thaliana protein match is: Eukaryotic protein of unknown function (DUF914) (TAIR:AT3G59340.1); Has 35333 Blast hits to 34131 proteins in 2444 species: Archae - 798; Bacteria - 22429; Metazoa - 974; Fungi - 991; Plants - 531; Viruses - 0…	protein_coding			-1.00752	4.48357	-4.73642	2.87e-05	0.000915014	2.18108
AT3G56060	AT3G56060.1	Glucose-methanol-choline (GMC) oxidoreductase family protein; FUNCTIONS IN: aldehyde-lyase activity, oxidoreductase activity, acting on CH-OH group of donors, FAD binding; INVOLVED IN: alcohol metabolic process; LOCATED IN: endomembrane system; EXPRESSED IN: 19 plant structures; EXPRESSED DURING: 10 growth stages; CONTAINS InterPro DOMAIN/s: Glucose-methanol-choline oxidoreductase, N-terminal (In…	protein_coding			-1.00922	3.48387	-5.5897	1.93e-06	0.000125357	4.81604
AT3G50685	AT3G50685.1	unknown protein; Has 52 Blast hits to 46 proteins in 20 species: Archae - 0; Bacteria - 0; Metazoa - 0; Fungi - 0; Plants - 45; Viruses - 0; Other Eukaryotes - 7 (source: NCBI BLink).	protein_coding			-1.01037	5.04421	-4.06845	0.00022331	0.00383388	0.225265
AT3G17070	AT3G17070.1	Peroxidase family protein; FUNCTIONS IN: peroxidase activity, heme binding; INVOLVED IN: response to oxidative stress, oxidation reduction; LOCATED IN: endomembrane system; EXPRESSED IN: guard cell; CONTAINS InterPro DOMAIN/s: Haem peroxidase (InterPro:IPR010255), Plant peroxidase (InterPro:IPR000823), Haem peroxidase, plant/fungal/bacterial (InterPro:IPR002016); BEST Arabidopsis thaliana protein…	protein_coding			-1.01128	2.81279	-5.17769	7.16e-06	0.00033761	3.63817
AT1G11850	AT1G11850.2	unknown protein; FUNCTIONS IN: molecular_function unknown; INVOLVED IN: biological_process unknown; LOCATED IN: endomembrane system; EXPRESSED IN: 19 plant structures; EXPRESSED DURING: 12 growth stages; Has 84259 Blast hits to 16502 proteins in 1194 species: Archae - 107; Bacteria - 41190; Metazoa - 21798; Fungi - 3523; Plants - 7569; Viruses - 886; Other Eukaryotes - 9186 (source: NCBI BLink).	protein_coding			-1.01251	1.69469	-3.71228	0.00064104	0.00823236	-0.787533
AT5G66420	AT5G66420.2	LOCATED IN: cellular_component unknown; EXPRESSED IN: 23 plant structures; EXPRESSED DURING: 13 growth stages; CONTAINS InterPro DOMAIN/s: Uncharacterised conserved protein UCP033271 (InterPro:IPR008322), TIM-barrel signal transduction protein, predicted (InterPro:IPR009215); Has 1232 Blast hits to 1230 proteins in 311 species: Archae - 18; Bacteria - 959; Metazoa - 1; Fungi - 84; Plants - 42; Vi…	protein_coding			-1.01669	5.30469	-7.71167	2.32e-09	9.74e-07	11.3609
AT3G11420	AT3G11420.1	Protein of unknown function (DUF604); CONTAINS InterPro DOMAIN/s: Protein of unknown function DUF604 (InterPro:IPR006740); BEST Arabidopsis thaliana protein match is: Protein of unknown function (DUF604) (TAIR:AT2G37730.1); Has 709 Blast hits to 698 proteins in 110 species: Archae - 0; Bacteria - 0; Metazoa - 213; Fungi - 200; Plants - 281; Viruses - 0; Other Eukaryotes - 15 (source: NCBI BLink).	protein_coding			-1.01832	4.8391	-3.87387	0.000398917	0.00582886	-0.252979
AT1G52280	AT1G52280.1	RAB GTPase homolog G3D (RABG3d); FUNCTIONS IN: GTP binding; INVOLVED IN: protein transport, small GTPase mediated signal transduction; LOCATED IN: plasma membrane, vacuole; EXPRESSED IN: 26 plant structures; EXPRESSED DURING: 15 growth stages; CONTAINS InterPro DOMAIN/s: Ras GTPase (InterPro:IPR001806), Small GTP-binding protein (InterPro:IPR005225), Small GTPase (InterPro:IPR020851), Ras (InterP…	protein_coding	RAB GTPASE HOMOLOG G3D (RABG3d)	RAB GTPASE HOMOLOG G3D (AtRABG3d);RAB GTPASE HOMOLOG G3D (RABG3d)	-1.01862	4.36791	-6.3129	1.91e-07	2.25e-05	7.07455
AT4G33220	AT4G33220.1	pectin methylesterase 44 (PME44); FUNCTIONS IN: enzyme inhibitor activity, pectinesterase activity; INVOLVED IN: cell wall modification; LOCATED IN: endomembrane system, cell wall, plant-type cell wall; EXPRESSED IN: 22 plant structures; EXPRESSED DURING: 13 growth stages; CONTAINS InterPro DOMAIN/s: Pectinesterase, active site (InterPro:IPR018040), Pectin lyase fold/virulence factor (InterPro:IP…	protein_coding	PECTIN METHYLESTERASE 44 (PME44)	PECTIN METHYLESTERASE 44 (PME44);A. THALIANA PECTIN METHYLESTERASE 44 (ATPME44)	-1.02012	6.21223	-6.09117	3.88e-07	3.86e-05	6.36015
AT3G52340	AT3G52340.1	sucrose-phosphatase (SPP2)	protein_coding	SUCROSE-6F-PHOSPHATE PHOSPHOHYDROLASE 2 (SPP2)	SUCROSE-PHOSPHATASE 2 (ATSPP2);SUCROSE-6F-PHOSPHATE PHOSPHOHYDROLASE 2 (SPP2)	-1.02019	4.93817	-4.52817	5.49e-05	0.0014587	1.69466
AT5G24920	AT5G24920.1	Encodes a member of the GDU (glutamine dumper) family proteins involved in amino acid export: At4g31730 (GDU1), At4g25760 (GDU2), At5g57685 (GDU3), At2g24762 (GDU4), At5g24920 (GDU5), At3g30725 (GDU6) and At5g38770 (GDU7).	protein_coding	GLUTAMINE DUMPER 5 (GDU5)	GLUTAMINE DUMPER 5 (AtGDU5);GLUTAMINE DUMPER 5 (GDU5)	-1.02047	0.610431	-2.89846	0.00612829	0.0407073	-2.44614
AT4G28490	AT4G28490.1	member of Receptor kinase-like protein family	protein_coding	HAESA (HAE)	RECEPTOR-LIKE PROTEIN KINASE 5 (RLK5);HAESA (HAE)	-1.02143	4.03416	-3.50283	0.00117202	0.0125877	-1.29397
AT2G31110	AT2G31110.2	Encodes a member of the TBL (TRICHOME BIREFRINGENCE-LIKE) gene family containing a plant-specific DUF231 (domain of unknown function) domain. TBL gene family has 46 members, two of which (TBR/AT5G06700 and TBL3/AT5G01360) have been shown to be involved in the synthesis and deposition of secondary wall cellulose, presumably by influencing the esterification state of pectic polymers. A nomenclature…	protein_coding			-1.02366	3.67535	-3.82714	0.000457903	0.00640972	-0.349742
AT1G10690	AT1G10690.1	unknown protein; BEST Arabidopsis thaliana protein match is: unknown protein (TAIR:AT1G60783.1); Has 59 Blast hits to 59 proteins in 9 species: Archae - 0; Bacteria - 0; Metazoa - 0; Fungi - 0; Plants - 59; Viruses - 0; Other Eukaryotes - 0 (source: NCBI BLink).	protein_coding			-1.02459	2.11604	-3.08168	0.00376818	0.0286085	-2.05956
AT3G10940	AT3G10940.1	Encodes a protein with a predicted dual-specificity phosphatase domain, similar to the glucan phosphorylases SEX4 and LSF1, however, it lacks the carbohydrate binding domain present in those proteins. Has phosphoglucan phosphatase activity. It binds to starch and specifically hydrolyzes phosphate from the C3-position.	protein_coding	LIKE SEX4 2 (LSF2)	LIKE SEX4 2 (LSF2)	-1.02461	3.58081	-3.81799	0.000470406	0.00652129	-0.501683
AT2G23690	AT2G23690.1	unknown protein; FUNCTIONS IN: molecular_function unknown; INVOLVED IN: N-terminal protein myristoylation; LOCATED IN: cellular_component unknown; EXPRESSED IN: 7 plant structures; EXPRESSED DURING: petal differentiation and expansion stage; BEST Arabidopsis thaliana protein match is: unknown protein (TAIR:AT4G37240.1); Has 243 Blast hits to 243 proteins in 15 species: Archae - 0; Bacteria - 0; M…	protein_coding			-1.02537	1.94793	-2.98054	0.00493727	0.0346948	-2.27087
AT5G60400	AT5G60400.3	unknown protein; Has 35333 Blast hits to 34131 proteins in 2444 species: Archae - 798; Bacteria - 22429; Metazoa - 974; Fungi - 991; Plants - 531; Viruses - 0; Other Eukaryotes - 9610 (source: NCBI BLink).	protein_coding			-1.02541	4.68653	-4.97894	1.34e-05	0.000523456	2.92063
AT5G08185	AT5G08185.2	Encodes a microRNA that targets DCL1. MicroRNAs are regulatory RNAs with a mature length of ~21-nucleotides that are processed from hairpin precursors by Dicer-like enzymes. MicroRNAs can negatively regulate gene expression by attenuating translation or by directing mRNA cleavage.Mature sequence: UCGAUAAACCUCUGCAUCCAG	protein_coding	MICRORNA162A (MIR162A)	MICRORNA162A (MIR162A)	-1.0265	3.76609	-3.33554	0.00187836	0.0176553	-1.54603
AT5G18360	AT5G18360.1	Disease resistance protein (TIR-NBS-LRR class) family; FUNCTIONS IN: transmembrane receptor activity, nucleoside-triphosphatase activity, nucleotide binding, ATP binding; INVOLVED IN: signal transduction, defense response, apoptosis, innate immune response; LOCATED IN: intrinsic to membrane, chloroplast; EXPRESSED IN: 16 plant structures; EXPRESSED DURING: 10 growth stages; CONTAINS InterPro DOMA…	protein_coding			-1.02675	1.98643	-3.12734	0.0033308	0.0261081	-1.84503
AT3G04110	AT3G04110.1	putative glutamate receptor (GLR1.1). Contains a functional cation - permeable pore domain. Involved in cellular cation homeostasis.	protein_coding	GLUTAMATE RECEPTOR 1.1 (GLR1.1)	(ATGLR1.1);GLUTAMATE RECEPTOR 1.1 (GLR1.1);GLUTAMATE RECEPTOR 1 (GLR1)	-1.02817	1.62194	-3.01806	0.00446854	0.0323426	-2.22131
AT4G02770	AT4G02770.1	Encodes a protein predicted by sequence similarity with spinach PsaD to be photosystem I reaction center subunit II (PsaD1)	protein_coding	PHOTOSYSTEM I SUBUNIT D-1 (PSAD-1)	PHOTOSYSTEM I SUBUNIT D-1 (PSAD-1)	-1.02877	7.99435	-3.19911	0.00273904	0.0228493	-1.94421
AT4G13930	AT4G13930.1	Encodes a serine hydroxymethyltransferase maximally expressed in root	protein_coding	SERINE HYDROXYMETHYLTRANSFERASE 4 (SHM4)	SERINE HYDROXYMETHYLTRANSFERASE 4 (SHM4)	-1.02917	6.87356	-4.23077	0.000136705	0.00274154	0.701808
AT2G33530	AT2G33530.1	serine carboxypeptidase-like 46 (scpl46); FUNCTIONS IN: serine-type carboxypeptidase activity; INVOLVED IN: proteolysis; LOCATED IN: plant-type cell wall; EXPRESSED IN: 21 plant structures; EXPRESSED DURING: 13 growth stages; CONTAINS InterPro DOMAIN/s: Peptidase S10, serine carboxypeptidase (InterPro:IPR001563), Peptidase S10, serine carboxypeptidase, active site (InterPro:IPR018202); BEST Arabi…	protein_coding	SERINE CARBOXYPEPTIDASE-LIKE 46 (scpl46)	SERINE CARBOXYPEPTIDASE-LIKE 46 (scpl46)	-1.02998	3.41551	-5.05148	1.07e-05	0.000448	3.19489
AT2G18300	AT2G18300.3	basic helix-loop-helix (bHLH) DNA-binding superfamily protein; FUNCTIONS IN: sequence-specific DNA binding transcription factor activity; INVOLVED IN: response to cytokinin stimulus, regulation of transcription; LOCATED IN: nucleus; EXPRESSED IN: 13 plant structures; EXPRESSED DURING: 8 growth stages; CONTAINS InterPro DOMAIN/s: Helix-loop-helix DNA-binding domain (InterPro:IPR001092), Helix-loop…	protein_coding			-1.03081	5.70865	-3.67672	0.000710871	0.00879561	-0.857539
AT1G13210	AT1G13210.1	autoinhibited Ca2+/ATPase II (ACA.l); FUNCTIONS IN: calmodulin binding, ATPase activity, coupled to transmembrane movement of ions, phosphorylative mechanism; INVOLVED IN: phospholipid transport, ATP biosynthetic process; LOCATED IN: plasma membrane; EXPRESSED IN: 23 plant structures; EXPRESSED DURING: 12 growth stages; CONTAINS InterPro DOMAIN/s: ATPase, P-type, phospholipid-translocating, flipp…	protein_coding	AUTOINHIBITED CA2+/ATPASE II (ACA.l)	AUTOINHIBITED CA2+/ATPASE II (ACA.l)	-1.0313	7.02174	-3.32946	0.00191045	0.017868	-1.79719
AT1G29980	AT1G29980.1	INVOLVED IN: biological_process unknown; LOCATED IN: plasma membrane, anchored to membrane; EXPRESSED IN: 24 plant structures; EXPRESSED DURING: 13 growth stages; CONTAINS InterPro DOMAIN/s: Protein of unknown function DUF642 (InterPro:IPR006946), Galactose-binding domain-like (InterPro:IPR008979); BEST Arabidopsis thaliana protein match is: Protein of unknown function, DUF642 (TAIR:AT2G34510.1);…	protein_coding			-1.03196	3.62322	-3.12682	0.00333553	0.0261134	-2.20887
AT5G56350	AT5G56350.1	Pyruvate kinase family protein; FUNCTIONS IN: pyruvate kinase activity, potassium ion binding, magnesium ion binding, catalytic activity; INVOLVED IN: glycolysis; LOCATED IN: cellular_component unknown; EXPRESSED IN: 22 plant structures; EXPRESSED DURING: 13 growth stages; CONTAINS InterPro DOMAIN/s: Pyruvate kinase, C-terminal-like (InterPro:IPR015795), Pyruvate kinase, active site (InterPro:IPR…	protein_coding			-1.03233	6.02236	-8.62479	1.43e-10	1.58e-07	14.0815
AT1G20440	AT1G20440.1	Belongs to the dehydrin protein family, which contains highly conserved stretches of 7-17 residues that are repetitively scattered in their sequences, the K-, S-, Y- and lysine rich segments. Cold regulated gene, amino acid sequence homology with Group II LEA (late embryogenesis abundant) proteins. Also responds to osmotic stress, ABA, dehydration and inhibits e.coli growth while overexpressed. C…	protein_coding	COLD-REGULATED 47 (COR47)	(RD17); (AtCOR47);COLD-REGULATED 47 (COR47)	-1.03371	9.26198	-3.77805	0.00052896	0.00712873	-0.500193
AT3G05730	AT3G05730.1	Encodes a defensin-like (DEFL) family protein.	protein_coding			-1.03486	3.34532	-2.8669	0.0066541	0.0429631	-2.92569
AT1G45688	AT1G45688.1	unknown protein; FUNCTIONS IN: molecular_function unknown; INVOLVED IN: biological_process unknown; LOCATED IN: plasma membrane; EXPRESSED IN: 22 plant structures; EXPRESSED DURING: 13 growth stages; BEST Arabidopsis thaliana protein match is: unknown protein (TAIR:AT5G42860.1); Has 258 Blast hits to 242 proteins in 39 species: Archae - 0; Bacteria - 11; Metazoa - 10; Fungi - 14; Plants - 198; Vi…	protein_coding			-1.03525	5.77347	-5.61755	1.76e-06	0.000117981	4.8842
AT1G76670	AT1G76670.1	Nucleotide-sugar transporter family protein; CONTAINS InterPro DOMAIN/s: Protein of unknown function DUF250 (InterPro:IPR004853); BEST Arabidopsis thaliana protein match is: Nucleotide-sugar transporter family protein (TAIR:AT1G21070.1); Has 1975 Blast hits to 1967 proteins in 210 species: Archae - 0; Bacteria - 20; Metazoa - 359; Fungi - 295; Plants - 1101; Viruses - 0; Other Eukaryotes - 200 (s…	protein_coding			-1.03577	6.65366	-6.18983	2.83e-07	2.99e-05	6.67831
AT5G10440	AT5G10440.1	Encodes a cyclin involved in cell proliferation during stomatal cell lineage development.	protein_coding	CYCLIN D4;2 (CYCD4;2)	CYCLIN D4;2 (CYCD4;2)	-1.03594	0.429787	-3.02078	0.00443633	0.0321488	-2.03031
AT3G60440	AT3G60440.1	Phosphoglycerate mutase family protein; LOCATED IN: chloroplast; EXPRESSED IN: 19 plant structures; EXPRESSED DURING: 13 growth stages; CONTAINS InterPro DOMAIN/s: Histidine phosphatase superfamily, clade-1 (InterPro:IPR013078), PRIB5 (InterPro:IPR012398); BEST Arabidopsis thaliana protein match is: Phosphoglycerate mutase family protein (TAIR:AT3G60450.1); Has 266 Blast hits to 262 proteins in 1…	protein_coding			-1.03805	3.05763	-5.62215	1.74e-06	0.000117007	4.9626
AT1G71970	AT1G71970.1	unknown protein; FUNCTIONS IN: molecular_function unknown; INVOLVED IN: biological_process unknown; LOCATED IN: chloroplast; EXPRESSED IN: 22 plant structures; EXPRESSED DURING: 13 growth stages; BEST Arabidopsis thaliana protein match is: unknown protein (TAIR:AT1G22680.1); Has 58 Blast hits to 58 proteins in 13 species: Archae - 0; Bacteria - 0; Metazoa - 4; Fungi - 0; Plants - 49; Viruses - 0;…	protein_coding			-1.03841	5.08214	-4.78262	2.49e-05	0.000837644	2.34411
AT5G67280	AT5G67280.1	receptor-like kinase (RLK); FUNCTIONS IN: protein serine/threonine kinase activity, kinase activity, ATP binding; INVOLVED IN: transmembrane receptor protein tyrosine kinase signaling pathway, protein amino acid phosphorylation; LOCATED IN: endomembrane system; EXPRESSED IN: 22 plant structures; EXPRESSED DURING: 13 growth stages; CONTAINS InterPro DOMAIN/s: Protein kinase, catalytic domain (Inte…	protein_coding	RECEPTOR-LIKE KINASE (RLK)	RECEPTOR-LIKE KINASE (RLK)	-1.03872	4.10818	-4.45852	6.81e-05	0.00168514	1.37346
AT5G61790	AT5G61790.1	calnexin 1 (CNX1); FUNCTIONS IN: unfolded protein binding, calcium ion binding; INVOLVED IN: protein folding; LOCATED IN: in 8 components; EXPRESSED IN: 26 plant structures; EXPRESSED DURING: 15 growth stages; CONTAINS InterPro DOMAIN/s: Calreticulin/calnexin, P (InterPro:IPR009033), Calreticulin/calnexin (InterPro:IPR001580), Calreticulin/calnexin, conserved site (InterPro:IPR018124), Concanaval…	protein_coding	CALNEXIN 1 (CNX1)	CALNEXIN 1 (CNX1); (ATCNX1)	-1.03943	6.8467	-6.6048	7.54e-08	1.16e-05	7.97107
AT5G11790	AT5G11790.1	N-MYC downregulated-like 2 (NDL2); CONTAINS InterPro DOMAIN/s: Pollen specific protein SF21 (InterPro:IPR015511), Ndr (InterPro:IPR004142); BEST Arabidopsis thaliana protein match is: N-MYC downregulated-like 1 (TAIR:AT5G56750.1); Has 30201 Blast hits to 17322 proteins in 780 species: Archae - 12; Bacteria - 1396; Metazoa - 17338; Fungi - 3422; Plants - 5037; Viruses - 0; Other Eukaryotes - 2996 …	protein_coding	N-MYC DOWNREGULATED-LIKE 2 (NDL2)	N-MYC DOWNREGULATED-LIKE 2 (NDL2)	-1.04047	4.75896	-5.71015	1.31e-06	9.5e-05	5.17797
AT3G02930	AT3G02930.1	Plant protein of unknown function (DUF827); LOCATED IN: chloroplast; EXPRESSED IN: 20 plant structures; EXPRESSED DURING: 8 growth stages; CONTAINS InterPro DOMAIN/s: Protein of unknown function DUF827, plant (InterPro:IPR008545); BEST Arabidopsis thaliana protein match is: Plant protein of unknown function (DUF827) (TAIR:AT5G16730.1); Has 245110 Blast hits to 119184 proteins in 3857 species: Arc…	protein_coding			-1.04125	2.85887	-4.05775	0.000230606	0.00391433	0.400214
AT1G76100	AT1G76100.1	One of two Arabidopsis plastocyanin genes. Expressed at 1/10th level of PETE2. Does not respond to increased copper levels and is thought to be the isoform that participates in electron transport under copper-limiting conditions. Mutation of this gene does not have obvious effect on photosynthesis.	protein_coding	PLASTOCYANIN 1 (PETE1)	PLASTOCYANIN 1 (PETE1)	-1.04161	4.88385	-4.22023	0.000141152	0.00278812	0.713214
AT4G12730	AT4G12730.1	AF333971 Arabidopsis thaliana fasciclin-like arabinogalactan-protein 2 (Fla2) mRNA, complete cds	protein_coding	FASCICLIN-LIKE ARABINOGALACTAN 2 (FLA2)	FASCICLIN-LIKE ARABINOGALACTAN 2 (FLA2)	-1.0422	7.40949	-2.99542	0.00474608	0.0338038	-2.65339
AT1G04760	AT1G04760.1	member of Synaptobrevin -like protein family	protein_coding	VESICLE-ASSOCIATED MEMBRANE PROTEIN 726 (VAMP726)	VESICLE-ASSOCIATED MEMBRANE PROTEIN 726 (VAMP726);VESICLE-ASSOCIATED MEMBRANE PROTEIN 726 (ATVAMP726)	-1.04255	0.234684	-2.789	0.0081372	0.049798	-2.55346
AT5G62070	AT5G62070.1	IQ-domain 23 (IQD23); CONTAINS InterPro DOMAIN/s: IQ calmodulin-binding region (InterPro:IPR000048); BEST Arabidopsis thaliana protein match is: IQ-domain 24 (TAIR:AT5G07240.1); Has 854 Blast hits to 833 proteins in 54 species: Archae - 0; Bacteria - 0; Metazoa - 62; Fungi - 7; Plants - 775; Viruses - 0; Other Eukaryotes - 10 (source: NCBI BLink).	protein_coding	IQ-DOMAIN 23 (IQD23)	IQ-DOMAIN 23 (IQD23)	-1.04512	4.44239	-5.46904	2.83e-06	0.000167658	4.45641
AT2G31390	AT2G31390.1	pfkB-like carbohydrate kinase family protein; FUNCTIONS IN: kinase activity, ribokinase activity; INVOLVED IN: D-ribose metabolic process, acetate fermentation, sucrose biosynthetic process, sucrose catabolic process, using beta-fructofuranosidase; LOCATED IN: plasma membrane; EXPRESSED IN: 27 plant structures; EXPRESSED DURING: 16 growth stages; CONTAINS InterPro DOMAIN/s: Carbohydrate/purine ki…	protein_coding			-1.04566	5.27095	-4.0337	0.000247854	0.00411073	0.238282
AT5G38070	AT5G38070.1	RING/FYVE/PHD zinc finger superfamily protein; CONTAINS InterPro DOMAIN/s: Protein of unknown function DUF3675 (InterPro:IPR022143), Zinc finger, C3HC4 RING-type (InterPro:IPR018957), Zinc finger, RING-CH-type (InterPro:IPR011016); BEST Arabidopsis thaliana protein match is: RING/FYVE/PHD zinc finger superfamily protein (TAIR:AT2G01275.2); Has 1807 Blast hits to 1807 proteins in 277 species: Arch…	protein_coding			-1.04671	0.860158	-3.41037	0.00152287	0.0151544	-1.11282
AT2G22830	AT2G22830.1	squalene epoxidase 2 (SQE2); FUNCTIONS IN: squalene monooxygenase activity, electron carrier activity, oxidoreductase activity, FAD binding; INVOLVED IN: sterol biosynthetic process; LOCATED IN: integral to membrane; EXPRESSED IN: 22 plant structures; EXPRESSED DURING: 13 growth stages; CONTAINS InterPro DOMAIN/s: Squalene epoxidase (InterPro:IPR013698), Fumarate reductase/succinate dehydrogenase…	protein_coding	SQUALENE EPOXIDASE 2 (SQE2)	SQUALENE EPOXIDASE 2 (SQE2)	-1.04727	3.68011	-5.60283	1.85e-06	0.000122101	4.8623
AT1G67950	AT1G67950.3	RNA-binding (RRM/RBD/RNP motifs) family protein; FUNCTIONS IN: oxidoreductase activity, nucleotide binding, nucleic acid binding; INVOLVED IN: oxidation reduction; EXPRESSED IN: 24 plant structures; EXPRESSED DURING: 13 growth stages; CONTAINS InterPro DOMAIN/s: Aldo/keto reductase (InterPro:IPR001395), RNA recognition motif, RNP-1 (InterPro:IPR000504), Nucleotide-binding, alpha-beta plait (Inter…	protein_coding			-1.04806	3.31298	-4.87356	1.87e-05	0.000666808	2.67114
AT5G44720	AT5G44720.1	Molybdenum cofactor sulfurase family protein; FUNCTIONS IN: molybdenum ion binding, Mo-molybdopterin cofactor sulfurase activity, pyridoxal phosphate binding, catalytic activity; INVOLVED IN: biological_process unknown; LOCATED IN: cellular_component unknown; EXPRESSED IN: 22 plant structures; EXPRESSED DURING: 13 growth stages; CONTAINS InterPro DOMAIN/s: Pyruvate kinase, beta-barrel-like (Inter…	protein_coding			-1.04818	5.01081	-5.65932	1.54e-06	0.000107707	5.02067
AT2G39710	AT2G39710.1	Encodes a Cysteine-rich peptide (CRP) family protein	protein_coding			-1.04897	2.98575	-2.93814	0.00552237	0.0376901	-2.40862
AT2G04160	AT2G04160.1	isolated from differential screening of a cDNA library from auxin-treated root culture. encodes a protein similar to subtilisin-like serine protease which is believed to be active outside the plant cell.	protein_coding	AUXIN-INDUCED IN ROOT CULTURES 3 (AIR3)	AUXIN-INDUCED IN ROOT CULTURES 3 (AIR3)	-1.04904	5.11405	-4.16895	0.000164907	0.0031458	0.522529
AT3G56240	AT3G56240.1	CCH protein belongs to a family of eukaryotic proteins that participate in intracellular copper homeostasis by delivering this metal to the secretory pathway; mainly located along the vascular bundles of senescing leaves and petioles as well as in stem sieve elements; hypothesized to have a role in copper mobilization from decaying organs towards reproductive structures, as a result of metallopro…	protein_coding	COPPER CHAPERONE (CCH)	COPPER CHAPERONE (CCH)	-1.05079	6.46311	-4.05564	0.000232066	0.00392733	0.170971
AT4G38860	AT4G38860.1	SAUR-like auxin-responsive protein family ; CONTAINS InterPro DOMAIN/s: Auxin responsive SAUR protein (InterPro:IPR003676); BEST Arabidopsis thaliana protein match is: SAUR-like auxin-responsive protein family (TAIR:AT2G21220.1); Has 1286 Blast hits to 1273 proteins in 28 species: Archae - 0; Bacteria - 0; Metazoa - 0; Fungi - 0; Plants - 1285; Viruses - 0; Other Eukaryotes - 1 (source: NCBI BLin…	protein_coding			-1.05313	3.16553	-3.42339	0.00146802	0.0147624	-1.32323
AT2G04080	AT2G04080.1	MATE efflux family protein; FUNCTIONS IN: antiporter activity, drug transmembrane transporter activity, transporter activity; INVOLVED IN: drug transmembrane transport, transmembrane transport; LOCATED IN: membrane; CONTAINS InterPro DOMAIN/s: MATE family transporter related protein (InterPro:IPR015521), Multi antimicrobial extrusion protein MatE (InterPro:IPR002528); BEST Arabidopsis thaliana pr…	protein_coding			-1.05323	2.16769	-3.70452	0.000655688	0.00835913	-0.712751
AT1G65150	AT1G65150.1	TRAF-like family protein; CONTAINS InterPro DOMAIN/s: TRAF-like (InterPro:IPR008974), MATH (InterPro:IPR002083); BEST Arabidopsis thaliana protein match is: TRAF-like superfamily protein (TAIR:AT1G65050.1); Has 512 Blast hits to 426 proteins in 21 species: Archae - 0; Bacteria - 0; Metazoa - 2; Fungi - 4; Plants - 496; Viruses - 0; Other Eukaryotes - 10 (source: NCBI BLink).	protein_coding			-1.05324	1.73563	-3.9595	0.000309385	0.00483346	0.270331
AT3G44960	AT3G44960.1	unknown protein; Has 34 Blast hits to 34 proteins in 10 species: Archae - 0; Bacteria - 0; Metazoa - 3; Fungi - 0; Plants - 31; Viruses - 0; Other Eukaryotes - 0 (source: NCBI BLink).	protein_coding			-1.05553	-0.270623	-2.80491	0.00781133	0.0483533	-2.60002
AT3G19370	AT3G19370.1	Plant protein of unknown function (DUF869); LOCATED IN: plasma membrane; EXPRESSED IN: 23 plant structures; EXPRESSED DURING: 13 growth stages; CONTAINS InterPro DOMAIN/s: Protein of unknown function DUF869, plant (InterPro:IPR008587); BEST Arabidopsis thaliana protein match is: Plant protein of unknown function (DUF869) (TAIR:AT2G23360.1); Has 44099 Blast hits to 25548 proteins in 1425 species: …	protein_coding			-1.05588	4.08366	-4.44569	7.08e-05	0.00174077	1.40304
AT5G41140	AT5G41140.1	Myosin heavy chain-related protein; BEST Arabidopsis thaliana protein match is: Myosin heavy chain-related protein (TAIR:AT1G63300.1); Has 1807 Blast hits to 1807 proteins in 277 species: Archae - 0; Bacteria - 0; Metazoa - 736; Fungi - 347; Plants - 385; Viruses - 0; Other Eukaryotes - 339 (source: NCBI BLink).	protein_coding			-1.05608	4.92336	-3.85283	0.000424504	0.00609932	-0.405343
AT4G03230	AT4G03230.1	S-locus lectin protein kinase family protein; FUNCTIONS IN: sugar binding, protein serine/threonine kinase activity, protein kinase activity, kinase activity, ATP binding; INVOLVED IN: protein amino acid phosphorylation, recognition of pollen; LOCATED IN: endomembrane system; EXPRESSED IN: 9 plant structures; EXPRESSED DURING: 4 anthesis, F mature embryo stage, petal differentiation and expansion…	protein_coding			-1.05765	3.74451	-2.93314	0.00559558	0.0381091	-2.46837
AT5G23210	AT5G23210.1	serine carboxypeptidase-like 34 (SCPL34); FUNCTIONS IN: serine-type carboxypeptidase activity; INVOLVED IN: proteolysis; LOCATED IN: vacuole, plant-type cell wall; EXPRESSED IN: 22 plant structures; EXPRESSED DURING: 13 growth stages; CONTAINS InterPro DOMAIN/s: Peptidase S10, serine carboxypeptidase (InterPro:IPR001563), Peptidase S10, serine carboxypeptidase, active site (InterPro:IPR018202); B…	protein_coding	SERINE CARBOXYPEPTIDASE-LIKE 34 (SCPL34)	SERINE CARBOXYPEPTIDASE-LIKE 34 (SCPL34)	-1.05791	6.2063	-5.65289	1.58e-06	0.000108145	4.99763
AT3G01060	AT3G01060.1	unknown protein; Has 640 Blast hits to 638 proteins in 201 species: Archae - 0; Bacteria - 293; Metazoa - 0; Fungi - 71; Plants - 72; Viruses - 0; Other Eukaryotes - 204 (source: NCBI BLink).	protein_coding			-1.05873	3.62741	-4.50454	5.9e-05	0.00151928	1.50608
AT3G58790	AT3G58790.1	Encodes a protein with putative galacturonosyltransferase activity.	protein_coding	GALACTURONOSYLTRANSFERASE 15 (GAUT15)	GALACTURONOSYLTRANSFERASE 15 (GAUT15)	-1.05958	4.69501	-6.19684	2.77e-07	2.95e-05	6.71577
AT1G18550	AT1G18550.1	ATP binding microtubule motor family protein; FUNCTIONS IN: microtubule motor activity, ATP binding; INVOLVED IN: microtubule-based movement; EXPRESSED IN: cultured cell; CONTAINS InterPro DOMAIN/s: Kinesin, motor region, conserved site (InterPro:IPR019821), Kinesin, motor domain (InterPro:IPR001752); BEST Arabidopsis thaliana protein match is: P-loop containing nucleoside triphosphate hydrolases…	protein_coding			-1.06003	2.01425	-2.96799	0.00510415	0.0356191	-2.25691
AT5G48450	AT5G48450.1	Encodes a protein with two DUF26 domains and a signal peptide for secretion. The protein is transported to the apoplast when it is expressed as a GFP fusion protein.	protein_coding	SKU5 SIMILAR 3 (sks3)	SKU5 SIMILAR 3 (sks3)	-1.06012	4.2394	-3.49717	0.00119105	0.0127269	-1.2912
AT5G38050	AT5G38050.1	RNA polymerase II transcription elongation factor; CONTAINS InterPro DOMAIN/s: Eaf, ELL-associated factor (InterPro:IPR019194); BEST Arabidopsis thaliana protein match is: RNA polymerase II transcription elongation factor (TAIR:AT1G71080.1); Has 1807 Blast hits to 1807 proteins in 277 species: Archae - 0; Bacteria - 0; Metazoa - 736; Fungi - 347; Plants - 385; Viruses - 0; Other Eukaryotes - 339 …	protein_coding			-1.06028	2.08368	-5.08636	9.55e-06	0.000409421	3.44498
AT5G20150	AT5G20150.1	Expression is upregulated in the shoot of cax1/cax3 mutant.	protein_coding	SPX DOMAIN GENE 1 (SPX1)	SPX DOMAIN GENE 1 (SPX1);ARABIDOPSIS THALIANA SPX DOMAIN GENE 1 (ATSPX1)	-1.06039	3.80901	-4.13112	0.000184888	0.00339641	0.569358
AT2G28890	AT2G28890.1	Encodes a protein phosphatase 2C like gene, similar to POL. Involved in leaf development. Knockout mutants have abnormally shaped leaves.	protein_coding	POLTERGEIST LIKE 4 (PLL4)	POLTERGEIST LIKE 4 (PLL4)	-1.06078	5.11541	-4.88768	1.79e-05	0.000645609	2.71507
AT2G31751	AT2G31751.1	Potential natural antisense gene, locus overlaps with AT2G31750	other_rna			-1.0628	1.5712	-3.19203	0.00279266	0.0230856	-1.62953
AT5G41120	AT5G41120.1	Esterase/lipase/thioesterase family protein; FUNCTIONS IN: transferase activity, transferring acyl groups other than amino-acyl groups, catalytic activity, acyltransferase activity; INVOLVED IN: metabolic process; LOCATED IN: cellular_component unknown; CONTAINS InterPro DOMAIN/s: Diacylglycerol acyltransferase (InterPro:IPR007130), Phospholipid/glycerol acyltransferase (InterPro:IPR002123), Alph…	protein_coding			-1.06301	2.53136	-4.38777	8.46e-05	0.00194365	1.42017
AT3G05030	AT3G05030.1	Encodes a vacuolar K+/H+ exchanger essential for active K+ uptake at the tonoplast and involved in regulating stomatal closure.	protein_coding	SODIUM HYDROGEN EXCHANGER 2 (NHX2)	(ATNHX2);SODIUM HYDROGEN EXCHANGER 2 (NHX2)	-1.06321	3.77315	-4.46355	6.7e-05	0.00166509	1.55297
AT2G25490	AT2G25490.1	Encodes an F-box protein involved in the ubiquitin/proteasome-dependent proteolysis of EIN3.	protein_coding	EIN3-BINDING F BOX PROTEIN 1 (EBF1)	(FBL6);EIN3-BINDING F BOX PROTEIN 1 (EBF1)	-1.06437	7.75366	-5.49534	2.61e-06	0.00015677	4.5293
AT3G23000	AT3G23000.1	Encodes a serine/threonine protein kinase with similarities to CBL-interacting protein kinases, SNF1 and SOS2.	protein_coding	CBL-INTERACTING PROTEIN KINASE 7 (CIPK7)	(ATSR2); (ATSRPK1);CBL-INTERACTING PROTEIN KINASE 7 (CIPK7);SNF1-RELATED PROTEIN KINASE 3.10 (SnRK3.10); (PKS7)	-1.06515	5.74951	-4.59401	4.48e-05	0.00126271	1.76243
AT5G66910	AT5G66910.1	Disease resistance protein (CC-NBS-LRR class) family; FUNCTIONS IN: ATP binding; INVOLVED IN: defense response, apoptosis; LOCATED IN: endomembrane system; CONTAINS InterPro DOMAIN/s: NB-ARC (InterPro:IPR002182), Leucine-rich repeat (InterPro:IPR001611), Powdery mildew resistance protein, RPW8 domain (InterPro:IPR008808), Disease resistance protein (InterPro:IPR000767); BEST Arabidopsis thaliana …	protein_coding			-1.06619	4.07028	-5.69203	1.39e-06	9.87e-05	5.20449
AT1G69870	AT1G69870.1	Encodes a low affinity nitrate transporter NRT1.7. Expressed in phloem. Responsible for source-to-sink remobilization of nitrate.	protein_coding	NITRATE TRANSPORTER 1.7 (NRT1.7)	NITRATE TRANSPORTER 1.7 (NRT1.7)	-1.06712	4.62489	-3.2699	0.00225409	0.0200123	-1.9768
AT1G51170	AT1G51170.1	Protein kinase superfamily protein; FUNCTIONS IN: kinase activity; INVOLVED IN: protein amino acid phosphorylation; EXPRESSED IN: 21 plant structures; EXPRESSED DURING: 7 growth stages; CONTAINS InterPro DOMAIN/s: Protein kinase, ATP binding site (InterPro:IPR017441), Protein kinase, catalytic domain (InterPro:IPR000719), Serine/threonine-protein kinase domain (InterPro:IPR002290), Serine/threoni…	protein_coding			-1.06726	3.1633	-3.35495	0.00177921	0.0169576	-1.34373
AT1G59710	AT1G59710.1	FUNCTIONS IN: molecular_function unknown; INVOLVED IN: biological_process unknown; LOCATED IN: cellular_component unknown; EXPRESSED IN: 23 plant structures; EXPRESSED DURING: 13 growth stages; CONTAINS InterPro DOMAIN/s: Protein of unknown function DUF569 (InterPro:IPR007679), Actin cross-linking (InterPro:IPR008999); BEST Arabidopsis thaliana protein match is: Actin cross-linking protein (TAIR:…	protein_coding			-1.06817	4.76766	-5.84574	8.51e-07	7.12e-05	5.59941
AT5G11970	AT5G11970.1	Protein of unknown function (DUF3511); FUNCTIONS IN: molecular_function unknown; INVOLVED IN: biological_process unknown; LOCATED IN: plasma membrane; EXPRESSED IN: 22 plant structures; EXPRESSED DURING: 13 growth stages; CONTAINS InterPro DOMAIN/s: Protein of unknown function DUF3511 (InterPro:IPR021899); BEST Arabidopsis thaliana protein match is: Protein of unknown function (DUF3511) (TAIR:AT2…	protein_coding			-1.06825	5.05158	-4.88679	1.79e-05	0.000645609	2.70884
AT1G72450	AT1G72450.1	JAZ6 transcript levels rise in response to a jasmonate stimulus and a GFP:JAZ6 fusion protein localizes to the nucleus. Application of jasmonate methyl ester to Arabidopsis roots reduces the levels of a JAZ6:GUS fusion protein, presumably by stimulating ubiquitin-proteasome-mediated degradation.	protein_coding	JASMONATE-ZIM-DOMAIN PROTEIN 6 (JAZ6)	TIFY DOMAIN PROTEIN 11B (TIFY11B);JASMONATE-ZIM-DOMAIN PROTEIN 6 (JAZ6)	-1.0687	5.1801	-3.99314	0.000279842	0.00445139	0.00553871
AT1G64530	AT1G64530.1	Plant regulator RWP-RK family protein; CONTAINS InterPro DOMAIN/s: Octicosapeptide/Phox/Bem1p (InterPro:IPR000270), Plant regulator RWP-RK (InterPro:IPR003035); BEST Arabidopsis thaliana protein match is: NIN like protein 7 (TAIR:AT4G24020.1); Has 703 Blast hits to 646 proteins in 50 species: Archae - 0; Bacteria - 2; Metazoa - 50; Fungi - 0; Plants - 585; Viruses - 0; Other Eukaryotes - 66 (sour…	protein_coding			-1.0719	4.24873	-5.84696	8.48e-07	7.12e-05	5.69267
AT4G15450	AT4G15450.1	Senescence/dehydration-associated protein-related; CONTAINS InterPro DOMAIN/s: Senescence/spartin-associated (InterPro:IPR009686); BEST Arabidopsis thaliana protein match is: Senescence/dehydration-associated protein-related (TAIR:AT3G21600.1); Has 171 Blast hits to 171 proteins in 35 species: Archae - 0; Bacteria - 4; Metazoa - 29; Fungi - 0; Plants - 134; Viruses - 0; Other Eukaryotes - 4 (sour…	protein_coding			-1.07231	2.58951	-4.89399	1.75e-05	0.000636631	2.70073
AT3G26570	AT3G26570.1	low affinity phosphate transporter	protein_coding	PHOSPHATE TRANSPORTER 2;1 (PHT2;1)	PHOSPHATE TRANSPORTER 2;1 (PHT2;1); (ORF02)	-1.07395	5.62141	-3.46476	0.00130591	0.0136419	-1.46867
AT4G37682	AT4G37682.1	Protein of unknown function (DUF1399); FUNCTIONS IN: molecular_function unknown; INVOLVED IN: biological_process unknown; LOCATED IN: cellular_component unknown; CONTAINS InterPro DOMAIN/s: Protein of unknown function DUF1399 (InterPro:IPR009836); BEST Arabidopsis thaliana protein match is: Protein of unknown function (duplicated DUF1399) (TAIR:AT4G37900.1); Has 30201 Blast hits to 17322 proteins…	protein_coding			-1.07405	0.236027	-3.02447	0.0043928	0.0318823	-2.00942
AT1G78100	AT1G78100.1	F-box family protein; CONTAINS InterPro DOMAIN/s: F-box domain, cyclin-like (InterPro:IPR001810), F-box domain, Skp2-like (InterPro:IPR022364); BEST Arabidopsis thaliana protein match is: F-box family protein (TAIR:AT1G22220.1); Has 149 Blast hits to 148 proteins in 12 species: Archae - 0; Bacteria - 0; Metazoa - 0; Fungi - 0; Plants - 149; Viruses - 0; Other Eukaryotes - 0 (source: NCBI BLink).	protein_coding	AUXIN UP-REGULATED F-BOX PROTEIN 1 (AUF1)	AUXIN UP-REGULATED F-BOX PROTEIN 1 (AUF1)	-1.07411	5.27188	-4.55495	5.05e-05	0.00138106	1.66108
AT1G55260	AT1G55260.1	Bifunctional inhibitor/lipid-transfer protein/seed storage 2S albumin superfamily protein; FUNCTIONS IN: lipid binding; INVOLVED IN: lipid transport; LOCATED IN: nucleus, anchored to membrane; EXPRESSED IN: 22 plant structures; EXPRESSED DURING: 13 growth stages; CONTAINS InterPro DOMAIN/s: Bifunctional inhibitor/plant lipid transfer protein/seed storage (InterPro:IPR016140), Plant lipid transfer…	protein_coding			-1.07581	4.88518	-5.14952	7.82e-06	0.000358659	3.44338
AT5G20190	AT5G20190.1	Tetratricopeptide repeat (TPR)-like superfamily protein; FUNCTIONS IN: binding; INVOLVED IN: biological_process unknown; LOCATED IN: chloroplast; CONTAINS InterPro DOMAIN/s: Tetratricopeptide-like helical (InterPro:IPR011990), Tetratricopeptide repeat-containing (InterPro:IPR013026); BEST Arabidopsis thaliana protein match is: Tetratricopeptide repeat (TPR)-like superfamily protein (TAIR:AT1G8013…	protein_coding			-1.07589	6.38151	-5.16919	7.35e-06	0.000344508	3.49935
AT5G22140	AT5G22140.1	FAD/NAD(P)-binding oxidoreductase family protein; FUNCTIONS IN: electron carrier activity, oxidoreductase activity, FAD binding; INVOLVED IN: oxidation reduction; LOCATED IN: plasma membrane; CONTAINS InterPro DOMAIN/s: FAD-dependent pyridine nucleotide-disulphide oxidoreductase (InterPro:IPR013027), Pyridine nucleotide-disulphide oxidoreductase, NAD-binding region (InterPro:IPR001327); BEST Arab…	protein_coding			-1.07843	2.97326	-3.19693	0.00275551	0.022932	-1.67926
AT1G21250	AT1G21250.1	cell wall-associated kinase, may function as a signaling receptor of extracellular matrix component such as oligogalacturonides.	protein_coding	CELL WALL-ASSOCIATED KINASE (WAK1)	CELL WALL-ASSOCIATED KINASE (WAK1); (PRO25)	-1.08101	1.48689	-3.17581	0.0029193	0.0238373	-2.22451
AT3G21950	AT3G21950.1	S-adenosyl-L-methionine-dependent methyltransferases superfamily protein; FUNCTIONS IN: methyltransferase activity; INVOLVED IN: response to cadmium ion; LOCATED IN: cellular_component unknown; EXPRESSED IN: 13 plant structures; EXPRESSED DURING: 11 growth stages; CONTAINS InterPro DOMAIN/s: SAM dependent carboxyl methyltransferase (InterPro:IPR005299); BEST Arabidopsis thaliana protein match is:…	protein_coding			-1.08103	0.0658275	-4.57444	4.76e-05	0.00132072	1.78041
AT1G01900	AT1G01900.1	Encodes AtSBT1.1, a subtilisin-like serine protease. Cleaves the phytosulfokine AtPSK4, a growth promoting peptide.	protein_coding	(SBTI1.1)	(ATSBT1.1); (SBTI1.1)	-1.0814	2.76091	-3.80529	0.000488315	0.00668829	-0.277314
AT5G04160	AT5G04160.1	Nucleotide-sugar transporter family protein; FUNCTIONS IN: organic anion transmembrane transporter activity; LOCATED IN: endomembrane system; EXPRESSED IN: 23 plant structures; EXPRESSED DURING: 15 growth stages; CONTAINS InterPro DOMAIN/s: Protein of unknown function DUF250 (InterPro:IPR004853); BEST Arabidopsis thaliana protein match is: Nucleotide-sugar transporter family protein (TAIR:AT3G102…	protein_coding			-1.08168	3.7937	-4.05469	0.000232733	0.00393137	0.214238
AT2G47240	AT2G47240.1	Encodes an acyl-CoA synthetase that acts on long-chain and very-long-chain fatty acids, involved in cuticular wax and cutin biosynthesis	protein_coding	LONG-CHAIN ACYL-COA SYNTHASE 1 (LACS1)	(CER8);ECERIFERUM 8 (CER8);LONG-CHAIN ACYL-COA SYNTHASE 1 (LACS1)	-1.08281	5.46784	-3.56064	0.000993585	0.0111623	-1.13235
AT1G78060	AT1G78060.1	Glycosyl hydrolase family protein; FUNCTIONS IN: hydrolase activity, hydrolyzing O-glycosyl compounds; INVOLVED IN: carbohydrate metabolic process; LOCATED IN: apoplast, cell wall, chloroplast, plant-type cell wall; EXPRESSED IN: 22 plant structures; EXPRESSED DURING: 13 growth stages; CONTAINS InterPro DOMAIN/s: Glycoside hydrolase, family 3, N-terminal (InterPro:IPR001764), Glycoside hydrolase,…	protein_coding			-1.08413	4.63107	-5.5565	2.14e-06	0.000133576	4.74026
AT3G50750	AT3G50750.1	BES1/BZR1 homolog 1 (BEH1); FUNCTIONS IN: transcription regulator activity; INVOLVED IN: biological_process unknown; LOCATED IN: vacuole; EXPRESSED IN: 17 plant structures; EXPRESSED DURING: 12 growth stages; CONTAINS InterPro DOMAIN/s: BZR1, transcriptional repressor (InterPro:IPR008540); BEST Arabidopsis thaliana protein match is: Brassinosteroid signalling positive regulator (BZR1) family prot…	protein_coding	BES1/BZR1 HOMOLOG 1 (BEH1)	BES1/BZR1 HOMOLOG 1 (BEH1)	-1.08434	3.77738	-5.10456	9.02e-06	0.000391297	3.3454
AT1G64970	AT1G64970.1	gamma-tocopherol methyltransferase (g-TMT) mRNA, nuclear; mutant has Deficient in alpha and beta tocopherol; Accumulates gamma tocopherol in leaves	protein_coding	GAMMA-TOCOPHEROL METHYLTRANSFERASE (G-TMT)	VITAMIN E DEFICIENT 4 (VTE4);GAMMA-TOCOPHEROL METHYLTRANSFERASE (G-TMT); (TMT1)	-1.08822	3.42719	-4.84033	2.07e-05	0.000719859	2.62242
AT5G52810	AT5G52810.1	NAD(P)-binding Rossmann-fold superfamily protein; FUNCTIONS IN: structural constituent of eye lens, binding, catalytic activity; INVOLVED IN: arginine catabolic process to glutamate, nopaline catabolic process, metabolic process, octopine catabolic process; LOCATED IN: chloroplast; EXPRESSED IN: 22 plant structures; EXPRESSED DURING: 13 growth stages; CONTAINS InterPro DOMAIN/s: NAD(P)-binding do…	protein_coding			-1.09002	2.38237	-4.5872	4.57e-05	0.00128303	1.90423
AT2G39210	AT2G39210.1	Major facilitator superfamily protein; FUNCTIONS IN: molecular_function unknown; INVOLVED IN: transmembrane transport; LOCATED IN: cellular_component unknown; EXPRESSED IN: 22 plant structures; EXPRESSED DURING: 13 growth stages; CONTAINS InterPro DOMAIN/s: Nodulin-like (InterPro:IPR010658), Major facilitator superfamily MFS-1 (InterPro:IPR011701), Major facilitator superfamily, general substrate…	protein_coding			-1.09008	5.17002	-3.56424	0.000983375	0.0110891	-1.13609
AT5G36002	AT5G36002.1	Potential natural antisense gene, locus overlaps with AT5G36001 and AT5G36000	other_rna			-1.09139	2.24346	-2.98651	0.0048598	0.0343447	-2.30416
AT5G17000	AT5G17000.1	Zinc-binding dehydrogenase family protein; FUNCTIONS IN: oxidoreductase activity, binding, catalytic activity, zinc ion binding; INVOLVED IN: response to oxidative stress; EXPRESSED IN: cultured cell, leaf; CONTAINS InterPro DOMAIN/s: GroES-like (InterPro:IPR011032), NAD(P)-binding domain (InterPro:IPR016040), Alcohol dehydrogenase, C-terminal (InterPro:IPR013149), Alcohol dehydrogenase superfami…	protein_coding			-1.09144	2.91189	-3.34146	0.00184754	0.0174349	-1.50213
AT1G75550	AT1G75550.1	glycine-rich protein; FUNCTIONS IN: molecular_function unknown; INVOLVED IN: biological_process unknown; LOCATED IN: endomembrane system; CONTAINS InterPro DOMAIN/s: Glycine rich protein (InterPro:IPR010800); Has 104419 Blast hits to 23434 proteins in 1584 species: Archae - 170; Bacteria - 39951; Metazoa - 33343; Fungi - 4889; Plants - 11483; Viruses - 1385; Other Eukaryotes - 13198 (source: NCBI…	protein_coding			-1.09241	1.16124	-3.22916	0.00252218	0.0216842	-1.59975
AT3G10960	AT3G10960.1	Encodes a homolog of the adenine-guanine-hypoxanthine transporter AzgA of Aspergillus nidulans. Function as a plant adenine-guanine transporter. Two closely related genes exist in Arabidopsis: AT3G10960 (Azg1) and AT5G50300 (Azg2).	protein_coding	AZA-GUANINE RESISTANT1 (AZG1)	AZA-GUANINE RESISTANT1 (AZG1);AZA-GUANINE RESISTANT1 (ATAZG1)	-1.09383	3.26683	-5.96623	5.79e-07	5.29e-05	6.06755
AT2G44940	AT2G44940.1	encodes a member of the DREB subfamily A-4 of ERF/AP2 transcription factor family. The protein contains one AP2 domain. There are 17 members in this subfamily including TINY.	protein_coding			-1.09402	3.28528	-3.09525	0.00363286	0.0278426	-2.17319
AT1G17430	AT1G17430.1	alpha/beta-Hydrolases superfamily protein; FUNCTIONS IN: hydrolase activity; INVOLVED IN: biological_process unknown; LOCATED IN: endomembrane system; EXPRESSED IN: 24 plant structures; EXPRESSED DURING: 13 growth stages; CONTAINS InterPro DOMAIN/s: Alpha/beta hydrolase fold-1 (InterPro:IPR000073); BEST Arabidopsis thaliana protein match is: alpha/beta-Hydrolases superfamily protein (TAIR:AT1G726…	protein_coding			-1.09404	3.84142	-4.22442	0.000139368	0.00276328	0.812295
AT4G17470	AT4G17470.1	alpha/beta-Hydrolases superfamily protein; FUNCTIONS IN: palmitoyl-(protein) hydrolase activity; INVOLVED IN: protein modification process; LOCATED IN: endomembrane system; EXPRESSED IN: 11 plant structures; EXPRESSED DURING: LP.06 six leaves visible, LP.04 four leaves visible, C globular stage, petal differentiation and expansion stage; CONTAINS InterPro DOMAIN/s: Palmitoyl protein thioesterase …	protein_coding			-1.09442	2.70365	-2.80631	0.00778333	0.0482511	-3.06549
AT4G25434	AT4G25434.2	nudix hydrolase homolog 10 (NUDT10); FUNCTIONS IN: ADP-ribose diphosphatase activity, NAD or NADH binding, catalytic activity; INVOLVED IN: metabolic process; LOCATED IN: cytosol; EXPRESSED IN: 6 plant structures; EXPRESSED DURING: petal differentiation and expansion stage; CONTAINS InterPro DOMAIN/s: NUDIX hydrolase domain-like (InterPro:IPR015797), NUDIX hydrolase, conserved site (InterPro:IPR0…	protein_coding	NUDIX HYDROLASE HOMOLOG 10 (NUDT10)	NUDIX HYDROLASE HOMOLOG 10 (NUDT10);NUDIX HYDROLASE HOMOLOG 10 (ATNUDT10)	-1.10016	-0.0725463	-2.86401	0.00670414	0.0431536	-2.37789
AT2G34300	AT2G34300.1	S-adenosyl-L-methionine-dependent methyltransferases superfamily protein; CONTAINS InterPro DOMAIN/s: Protein of unknown function DUF248, methyltransferase putative (InterPro:IPR004159); BEST Arabidopsis thaliana protein match is: S-adenosyl-L-methionine-dependent methyltransferases superfamily protein (TAIR:AT1G29470.2); Has 54799 Blast hits to 24520 proteins in 1584 species: Archae - 172; Bacte…	protein_coding			-1.10061	5.73119	-5.58522	1.96e-06	0.000125993	4.79139
AT3G61460	AT3G61460.1	Encodes a novel ring finger protein and forms an N-terminal hydrophobic domain and a C-terminal RING-H2 signature. Expression is down regulated by brassinolide.	protein_coding	BRASSINOSTEROID-RESPONSIVE RING-H2 (BRH1)	BRASSINOSTEROID-RESPONSIVE RING-H2 (BRH1)	-1.1016	5.86506	-6.48193	1.12e-07	1.57e-05	7.57913
AT2G04850	AT2G04850.1	Auxin-responsive family protein; CONTAINS InterPro DOMAIN/s: Cytochrome b561, eukaryote (InterPro:IPR004877), Uncharacterised conserved protein UCP037471 (InterPro:IPR017214), Protein of unknown function DUF568, DOMON-like (InterPro:IPR007613), DOMON related (InterPro:IPR005018), Cytochrome b561/ferric reductase transmembrane (InterPro:IPR006593); BEST Arabidopsis thaliana protein match is: Auxin…	protein_coding			-1.10346	2.71518	-4.12396	0.000188931	0.00344655	0.687872
AT4G29020	AT4G29020.1	glycine-rich protein; FUNCTIONS IN: molecular_function unknown; INVOLVED IN: biological_process unknown; LOCATED IN: endomembrane system; EXPRESSED IN: 22 plant structures; EXPRESSED DURING: 13 growth stages; Has 92355 Blast hits to 23750 proteins in 1587 species: Archae - 185; Bacteria - 38167; Metazoa - 25977; Fungi - 4591; Plants - 7302; Viruses - 1155; Other Eukaryotes - 14978 (source: NCBI B…	protein_coding			-1.1035	6.13926	-3.61476	0.000850403	0.0100145	-1.06013
AT3G25700	AT3G25700.1	Eukaryotic aspartyl protease family protein; FUNCTIONS IN: aspartic-type endopeptidase activity; INVOLVED IN: proteolysis; CONTAINS InterPro DOMAIN/s: Peptidase aspartic (InterPro:IPR021109), Peptidase aspartic, catalytic (InterPro:IPR009007), Peptidase A1 (InterPro:IPR001461); BEST Arabidopsis thaliana protein match is: Eukaryotic aspartyl protease family protein (TAIR:AT2G42980.1); Has 2947 Bla…	protein_coding			-1.1048	2.16977	-3.47181	0.00128007	0.0134523	-1.0855
AT5G03520	AT5G03520.1	RAB GTPase homolog 8C (RAB8C); FUNCTIONS IN: GTP binding; INVOLVED IN: protein transport, small GTPase mediated signal transduction; EXPRESSED IN: 22 plant structures; EXPRESSED DURING: 13 growth stages; CONTAINS InterPro DOMAIN/s: Ras GTPase (InterPro:IPR001806), Small GTP-binding protein (InterPro:IPR005225), Small GTPase (InterPro:IPR020851), Ras (InterPro:IPR013753), Ras small GTPase, Rab typ…	protein_coding	RAB GTPASE HOMOLOG 8C (RAB8C)	RAB GTPASE HOMOLOG 8C (RAB8C);RAB HOMOLOG E1D (RAB-E1D);ARABIDOPSIS RAB HOMOLOG E1D (ATRAB-E1D); (ATRABE1D);RAB GTPASE HOMOLOG 8C (ATRAB8C)	-1.10482	6.39828	-4.25153	0.000128334	0.00262124	0.759906
AT5G65280	AT5G65280.1	Encodes a protein with reported similarity to GCR2 a putative G protein coupled receptor thought to be an ABA receptor. Loss of function mutations in GCL1 show no ABA response defects based on assays of seed germination and seedling development.GCL1 also has similarity to LANCL1 and LANCL2, human homologs of bacterial lanthionine synthetase.	protein_coding	GCR2-LIKE 1 (GCL1)	GCR2-LIKE 1 (GCL1)	-1.10603	2.38342	-2.98845	0.00483477	0.0342495	-2.27559
AT2G39420	AT2G39420.1	alpha/beta-Hydrolases superfamily protein; BEST Arabidopsis thaliana protein match is: alpha/beta-Hydrolases superfamily protein (TAIR:AT2G39410.2); Has 4720 Blast hits to 4720 proteins in 1453 species: Archae - 32; Bacteria - 3497; Metazoa - 120; Fungi - 143; Plants - 476; Viruses - 35; Other Eukaryotes - 417 (source: NCBI BLink).	protein_coding			-1.10748	4.30428	-6.72384	5.17e-08	9.02e-06	8.3355
AT1G31690	AT1G31690.1	Copper amine oxidase family protein; FUNCTIONS IN: quinone binding, primary amine oxidase activity, copper ion binding; INVOLVED IN: oxidation reduction, amine metabolic process; LOCATED IN: endomembrane system; EXPRESSED IN: 9 plant structures; EXPRESSED DURING: 7 growth stages; CONTAINS InterPro DOMAIN/s: Copper amine oxidase, N-terminal (InterPro:IPR016182), Copper amine oxidase, N2/N3-termina…	protein_coding			-1.10871	-0.693901	-4.37124	8.9e-05	0.00201182	1.09448
AT4G21960	AT4G21960.1	Encodes AT4g21960 (AT4g21960/T8O5_170).	protein_coding	(PRXR1)	(PRXR1)	-1.11039	9.69549	-5.13432	8.21e-06	0.000371476	3.51345
AT1G26208	AT1G26208.1	Potential natural antisense gene, locus overlaps with AT1G26210	other_rna			-1.11102	3.3777	-3.9331	0.000334669	0.00514426	-0.0701113
AT4G17350	AT4G17350.1	CONTAINS InterPro DOMAIN/s: Pleckstrin-like, plant (InterPro:IPR013666), Protein of unknown function DUF828 (InterPro:IPR008546), Pleckstrin homology (InterPro:IPR001849); BEST Arabidopsis thaliana protein match is: Plant protein of unknown function (DUF828) with plant pleckstrin homology-like region (TAIR:AT5G47440.1); Has 205 Blast hits to 188 proteins in 18 species: Archae - 0; Bacteria - 0; M…	protein_coding			-1.11511	2.32728	-3.86196	0.000413212	0.00598772	0.0174343
AT5G61270	AT5G61270.1	Basic helix-loop-helix (bHLH) phytochrome interacting factor. Interacts specifically with the far-red light?absorbing Pfr form of phyB through a conserved domain called the active phyB binding motif. Upon light exposure, PIF7 rapidly migrates to intranuclear speckles, where it colocalizes with phyB. Role as negative regulator of phyB-mediated seedling deetiolation.	protein_coding	PHYTOCHROME-INTERACTING FACTOR7 (PIF7)	PHYTOCHROME-INTERACTING FACTOR7 (PIF7)	-1.11726	1.89127	-5.07705	9.84e-06	0.000418487	3.22024
AT2G28580	AT2G28580.1	Plant protein of unknown function (DUF247); CONTAINS InterPro DOMAIN/s: Protein of unknown function DUF247, plant (InterPro:IPR004158); BEST Arabidopsis thaliana protein match is: Plant protein of unknown function (DUF247) (TAIR:AT2G44930.1); Has 1063 Blast hits to 972 proteins in 18 species: Archae - 0; Bacteria - 0; Metazoa - 0; Fungi - 0; Plants - 1063; Viruses - 0; Other Eukaryotes - 0 (sourc…	protein_coding			-1.11763	-1.71628	-2.95658	0.00526039	0.0363569	-2.22935
AT1G64670	AT1G64670.1	Encodes a epidermally expressed extracellular protein that likely functions as an alpha-beta hydrolase and is required for normal cuticle formation. Homozygous mutant plants are dwarfed and have abnormal leaves, collapsed cells, reduced numbers of trichomes. The specific role of BDG is unclear: it may function in cutin biosynthesis or as a cross-linking enzyme in the cell wall itself.	protein_coding	BODYGUARD1 (BDG1)	9-CIS EPOXYCAROTENOID DIOXYGENASE DEFECTIVE 1 (CED1);BODYGUARD1 (BDG1)	-1.11791	4.35769	-3.61671	0.000845632	0.00997513	-0.928747
AT1G43650	AT1G43650.1	nodulin MtN21-like transporter family protein	protein_coding			-1.11851	1.61737	-4.14197	0.000178928	0.00331809	0.639006
AT5G66330	AT5G66330.1	Leucine-rich repeat (LRR) family protein; INVOLVED IN: signal transduction; LOCATED IN: endomembrane system; EXPRESSED IN: 15 plant structures; EXPRESSED DURING: 8 growth stages; CONTAINS InterPro DOMAIN/s: Leucine-rich repeat-containing N-terminal domain, type 2 (InterPro:IPR013210), Leucine-rich repeat (InterPro:IPR001611); BEST Arabidopsis thaliana protein match is: Leucine-rich repeat (LRR) f…	protein_coding			-1.11963	2.52591	-4.30966	0.000107482	0.0023005	1.184
AT1G31770	AT1G31770.1	ATP-binding cassette 14 (ABCG14); FUNCTIONS IN: ATPase activity, coupled to transmembrane movement of substances; LOCATED IN: membrane; EXPRESSED IN: 23 plant structures; EXPRESSED DURING: 13 growth stages; CONTAINS InterPro DOMAIN/s: ATPase, AAA+ type, core (InterPro:IPR003593), ABC transporter-like (InterPro:IPR003439), ABC-2 type transporter (InterPro:IPR013525), ABC transporter, conserved sit…	protein_coding	ATP-BINDING CASSETTE G14 (ABCG14)	ATP-BINDING CASSETTE G14 (ABCG14)	-1.11965	3.97345	-3.64307	0.000783663	0.00946753	-0.652542
AT3G15353	AT3G15353.1	metallothionein, binds to and detoxifies excess copper and other metals, limiting oxidative damage	protein_coding	METALLOTHIONEIN 3 (MT3)	METALLOTHIONEIN 3 (MT3); (ATMT3)	-1.11999	8.29957	-3.89075	0.000379478	0.00561838	-0.185687
AT1G64890	AT1G64890.1	Major facilitator superfamily protein; CONTAINS InterPro DOMAIN/s: Major facilitator superfamily, general substrate transporter (InterPro:IPR016196), Biopterin transport-related protein BT1 (InterPro:IPR004324); BEST Arabidopsis thaliana protein match is: Major facilitator superfamily protein (TAIR:AT1G04570.1); Has 1088 Blast hits to 1079 proteins in 365 species: Archae - 17; Bacteria - 560; Met…	protein_coding			-1.12033	3.42222	-5.03166	1.14e-05	0.000463051	3.20228
AT2G15970	AT2G15970.1	encodes an alpha form of a protein similar to the cold acclimation protein WCOR413 in wheat. Expression is induced by short-term cold-treatment, water deprivation, and abscisic acid treatment.	protein_coding	COLD REGULATED 413 PLASMA MEMBRANE 1 (COR413-PM1)	CYCLOPHILLIN 19 (ATCYP19); (FL3-5A3);ARABIDOPSIS THALIANA COLD-REGULATED413 PLASMA MEMBRANE 1 (ATCOR413-PM1); (WCOR413-LIKE); (WCOR413);COLD REGULATED 413 PLASMA MEMBRANE 1 (COR413-PM1)	-1.12213	8.03707	-4.89866	1.73e-05	0.000628432	2.76072
AT3G47380	AT3G47380.1	Plant invertase/pectin methylesterase inhibitor superfamily protein; FUNCTIONS IN: enzyme inhibitor activity, pectinesterase inhibitor activity, pectinesterase activity; INVOLVED IN: biological_process unknown; LOCATED IN: endomembrane system; EXPRESSED IN: 14 plant structures; EXPRESSED DURING: 9 growth stages; CONTAINS InterPro DOMAIN/s: Pectinesterase inhibitor (InterPro:IPR006501); BEST Arabi…	protein_coding			-1.12516	1.10261	-3.36065	0.00175105	0.0168409	-1.32659
AT2G27820	AT2G27820.1	Encodes a plastid-localized arogenate dehydratase involved in phenylalanine biosynthesis. Not less than six genes encoding ADT were identi&#64257;ed in the Arabidopsis genome: ADT1 [At1g11790]; ADT2 [At3g07630]; ADT3 [At2g27820]; ADT4 [At3g44720]; ADT5 [At5g22630]; and ADT6 [At1g08250].	protein_coding	PREPHENATE DEHYDRATASE 1 (PD1)	AROGENATE DEHYDRATASE 3 (ADT3);PREPHENATE DEHYDRATASE 1 (PD1)	-1.12541	4.78533	-4.63449	3.95e-05	0.00114708	1.88344
AT4G39210	AT4G39210.1	Encodes the large subunit of ADP-Glucose Pyrophosphorylase which catalyzes the first, rate limiting step in starch biosynthesis. The large subunit plays a regulatory role whereas the small subunit (ApS) is the catalytic isoform. Four isoforms (ApL1-4) have been identified. ApL3 is the major large subunit isoform present in inflorescences, fruits and roots.	protein_coding	(APL3)	(APL3)	-1.12561	3.72727	-4.00065	0.000273626	0.00438348	0.134187
AT5G64572	AT5G64572.1	Potential natural antisense gene, locus overlaps with AT5G64570	other_rna			-1.12675	1.51766	-4.02549	0.000254026	0.00416376	0.419095
AT4G33810	AT4G33810.1	Glycosyl hydrolase superfamily protein; FUNCTIONS IN: cation binding, hydrolase activity, hydrolyzing O-glycosyl compounds, catalytic activity; INVOLVED IN: carbohydrate metabolic process; LOCATED IN: cell wall; EXPRESSED IN: 21 plant structures; EXPRESSED DURING: 12 growth stages; CONTAINS InterPro DOMAIN/s: Glycoside hydrolase, family 10 (InterPro:IPR001000), Glycoside hydrolase, catalytic core…	protein_coding			-1.12942	0.934684	-3.03586	0.00426118	0.0312265	-2.03111
AT2G04570	AT2G04570.1	GDSL-like Lipase/Acylhydrolase superfamily protein; FUNCTIONS IN: hydrolase activity, acting on ester bonds, carboxylesterase activity; INVOLVED IN: lipid metabolic process; LOCATED IN: endomembrane system; EXPRESSED IN: 21 plant structures; EXPRESSED DURING: 12 growth stages; CONTAINS InterPro DOMAIN/s: Lipase, GDSL (InterPro:IPR001087); BEST Arabidopsis thaliana protein match is: GDSL-like Lipa…	protein_coding			-1.12995	3.4428	-4.76505	2.63e-05	0.000854816	2.33314
AT3G22886	AT3G22886.1	Encodes a microRNA that targets ARF family members ARF6 and ARF8. Essential for fertility of both ovules and anthers. MicroRNAs are regulatory RNAs with a mature length of ~21-nucleotides that are processed from hairpin precursors by Dicer-like enzymes. MicroRNAs can negatively regulate gene expression by attenuating translation or by directing mRNA cleavage.Mature sequence: UGAAGCUGCCAGCAUGAUCUA	miRNA	MICRORNA167A (MIR167A)	MICRORNA167A (MIR167A)	-1.13166	1.05818	-3.76245	0.000553688	0.00738145	-0.244194
AT5G64240	AT5G64240.2	Encodes a type I metacaspase. Two Arabidopsis metacaspases, AT1G02170 (MC1) and AT4G25110 (MC2) antagonistically control programmed cell death in Arabidopsis. MC1 is a positive regulator of cell death and requires conserved caspase-like putative catalytic residues for its function. MC2 negatively regulates cell death. This function is independent of the putative catalytic residues. A third type I…	protein_coding	METACASPASE 3 (MC3)	METACASPASE 3 (AtMC3);METACASPASE 3 (MC3);METACASPASE 1A (AtMCP1a);METACASPASE 1A (MCP1a)	-1.13214	4.99908	-5.70483	1.34e-06	9.63e-05	5.15655
AT1G79620	AT1G79620.1	Leucine-rich repeat protein kinase family protein; FUNCTIONS IN: protein serine/threonine kinase activity, kinase activity, ATP binding; INVOLVED IN: transmembrane receptor protein tyrosine kinase signaling pathway, protein amino acid phosphorylation; LOCATED IN: endomembrane system; EXPRESSED IN: 8 plant structures; EXPRESSED DURING: 4 anthesis, petal differentiation and expansion stage; CONTAIN…	protein_coding			-1.13248	3.25589	-4.36726	9.01e-05	0.00202242	1.32618
AT1G18390	AT1G18390.2	Protein kinase superfamily protein; FUNCTIONS IN: protein serine/threonine kinase activity, protein kinase activity, kinase activity, ATP binding; INVOLVED IN: protein amino acid phosphorylation; EXPRESSED IN: 22 plant structures; EXPRESSED DURING: 13 growth stages; CONTAINS InterPro DOMAIN/s: Protein kinase, ATP binding site (InterPro:IPR017441), Protein kinase, catalytic domain (InterPro:IPR000…	protein_coding			-1.13271	3.61859	-3.62473	0.0008263	0.00980967	-0.782536
AT5G20830	AT5G20830.1	Encodes a protein with sucrose synthase activity (SUS1).	protein_coding	SUCROSE SYNTHASE 1 (SUS1)	(ASUS1);SUCROSE SYNTHASE 1 (SUS1); (atsus1)	-1.13481	4.75951	-5.65587	1.56e-06	0.000108145	5.03789
AT5G50100	AT5G50100.1	Putative thiol-disulphide oxidoreductase DCC; FUNCTIONS IN: molecular_function unknown; INVOLVED IN: biological_process unknown; LOCATED IN: mitochondrion; EXPRESSED IN: 22 plant structures; EXPRESSED DURING: 15 growth stages; CONTAINS InterPro DOMAIN/s: Thioredoxin-like fold (InterPro:IPR012336), Putative thiol-disulphide oxidoreductase DCC (InterPro:IPR007263); Has 30201 Blast hits to 17322 pro…	protein_coding			-1.1354	1.49689	-3.57672	0.00094877	0.0108386	-0.886808
AT1G06640	AT1G06640.1	encodes a protein whose sequence is similar to a 2-oxoglutarate-dependent dioxygenase	protein_coding			-1.13744	6.14516	-7.84621	1.53e-09	6.98e-07	11.768
AT5G55620	AT5G55620.1	unknown protein; BEST Arabidopsis thaliana protein match is: unknown protein (TAIR:AT3G09950.1); Has 30201 Blast hits to 17322 proteins in 780 species: Archae - 12; Bacteria - 1396; Metazoa - 17338; Fungi - 3422; Plants - 5037; Viruses - 0; Other Eukaryotes - 2996 (source: NCBI BLink).	protein_coding			-1.13795	2.54844	-3.12611	0.00334197	0.0261443	-2.16955
AT2G40150	AT2G40150.1	Encodes a member of the TBL (TRICHOME BIREFRINGENCE-LIKE) gene family containing a plant-specific DUF231 (domain of unknown function) domain. TBL gene family has 46 members, two of which (TBR/AT5G06700 and TBL3/AT5G01360) have been shown to be involved in the synthesis and deposition of secondary wall cellulose, presumably by influencing the esterification state of pectic polymers. A nomenclature…	protein_coding	TRICHOME BIREFRINGENCE-LIKE 28 (TBL28)	TRICHOME BIREFRINGENCE-LIKE 28 (TBL28)	-1.13802	2.18905	-4.19691	0.00015151	0.00294833	0.876905
AT3G49510	AT3G49510.1	F-box family protein; CONTAINS InterPro DOMAIN/s: F-box domain, cyclin-like (InterPro:IPR001810), F-box domain, Skp2-like (InterPro:IPR022364), F-box associated domain, type 1 (InterPro:IPR006527), F-box associated interaction domain (InterPro:IPR017451); BEST Arabidopsis thaliana protein match is: F-box and associated interaction domains-containing protein (TAIR:AT3G49520.1); Has 2110 Blast hits…	protein_coding			-1.1383	0.497969	-3.49151	0.00121038	0.0128876	-0.912653
AT1G29050	AT1G29050.1	Encodes a member of the TBL (TRICHOME BIREFRINGENCE-LIKE) gene family containing a plant-specific DUF231 (domain of unknown function) domain. TBL gene family has 46 members, two of which (TBR/AT5G06700 and TBL3/AT5G01360) have been shown to be involved in the synthesis and deposition of secondary wall cellulose, presumably by influencing the esterification state of pectic polymers. A nomenclature…	protein_coding	TRICHOME BIREFRINGENCE-LIKE 38 (TBL38)	TRICHOME BIREFRINGENCE-LIKE 38 (TBL38)	-1.13981	5.50577	-5.46365	2.88e-06	0.000168194	4.46413
AT1G33800	AT1G33800.1	Protein of unknown function (DUF579); FUNCTIONS IN: molecular_function unknown; INVOLVED IN: biological_process unknown; LOCATED IN: endomembrane system; EXPRESSED IN: 20 plant structures; EXPRESSED DURING: 12 growth stages; CONTAINS InterPro DOMAIN/s: Protein of unknown function DUF579 (InterPro:IPR021148), Conserved hypothetical protein CHP01627 (InterPro:IPR006514); BEST Arabidopsis thaliana p…	protein_coding			-1.14004	2.76199	-2.80094	0.00789154	0.0486776	-2.52752
AT5G10180	AT5G10180.1	Encodes a low-affinity sulfate transporter expressed in the root cap and central cylinder, where it is induced by sulfur starvation. Expression in the shoot vascular system is not induced by sulfur starvation.	protein_coding	SULFATE TRANSPORTER 2;1 (SULTR2;1)	SULFATE TRANSPORTER 2;1 (SULTR2;1);ARABIDOPSIS SULFATE TRANSPORTER 68 (AST68)	-1.14055	5.99788	-3.18774	0.00282568	0.0232882	-2.18141
AT4G01450	AT4G01450.2	nodulin MtN21-like transporter family protein	protein_coding			-1.14078	3.85274	-3.56846	0.000971535	0.0109733	-0.795344
AT4G25990	AT4G25990.2	chloroplast import apparatus CIA2-like. CIA2 is a transcription factor which upregulates chloroplast translocon genes	protein_coding	(CIL)	(CIL)	-1.14139	3.29274	-3.47358	0.00127363	0.0134178	-1.44303
AT2G18230	AT2G18230.1	Encodes a protein that might have inorganic pyrophosphatase activity.	protein_coding	PYROPHOSPHORYLASE 2 (PPa2)	PYROPHOSPHORYLASE 2 (AtPPa2);PYROPHOSPHORYLASE 2 (PPa2)	-1.14205	3.35597	-4.82853	2.15e-05	0.000742091	2.66296
AT5G66770	AT5G66770.1	GRAS family transcription factor; CONTAINS InterPro DOMAIN/s: Transcription factor GRAS (InterPro:IPR005202); BEST Arabidopsis thaliana protein match is: GRAS family transcription factor (TAIR:AT3G50650.1); Has 1807 Blast hits to 1807 proteins in 277 species: Archae - 0; Bacteria - 0; Metazoa - 736; Fungi - 347; Plants - 385; Viruses - 0; Other Eukaryotes - 339 (source: NCBI BLink).	protein_coding			-1.1426	4.30759	-4.80552	2.31e-05	0.000784723	2.3965
AT1G21270	AT1G21270.1	cytoplasmic serine/threonine protein kinase induced by salicylic acid. mutant plants exhibit a loss of cell expansion and dependence on sugars and salts for seedling growth, affecting the expression and activity of vacuolar invertase.	protein_coding	WALL-ASSOCIATED KINASE 2 (WAK2)	WALL-ASSOCIATED KINASE 2 (WAK2)	-1.14499	1.78583	-4.77733	2.53e-05	0.000843182	2.31984
AT1G78670	AT1G78670.1	gamma-glutamyl hydrolase 3 (GGH3); FUNCTIONS IN: hydrolase activity, omega peptidase activity, catalytic activity; INVOLVED IN: glutamine metabolic process; LOCATED IN: vacuole; EXPRESSED IN: 22 plant structures; EXPRESSED DURING: 13 growth stages; CONTAINS InterPro DOMAIN/s: Peptidase C26, gamma-glutamyl hydrolase (InterPro:IPR015527), Peptidase C26 (InterPro:IPR011697); BEST Arabidopsis thalian…	protein_coding	GAMMA-GLUTAMYL HYDROLASE 3 (GGH3)	GAMMA-GLUTAMYL HYDROLASE 3 (ATGGH3);GAMMA-GLUTAMYL HYDROLASE 3 (GGH3)	-1.14639	5.97471	-3.9517	0.000316656	0.00491413	-0.0339428
AT5G14940	AT5G14940.1	Major facilitator superfamily protein; FUNCTIONS IN: amino acid transmembrane transporter activity, transporter activity; INVOLVED IN: oligopeptide transport, response to nematode; LOCATED IN: membrane; EXPRESSED IN: 17 plant structures; EXPRESSED DURING: 9 growth stages; CONTAINS InterPro DOMAIN/s: Oligopeptide transporter (InterPro:IPR000109), Major facilitator superfamily, general substrate tr…	protein_coding			-1.14676	2.5063	-3.00936	0.00457334	0.0329422	-2.13079
AT1G68760	AT1G68760.1	Encodes a cytosol-localized nudix hydrolase that hydrolyzes 8-oxo-(d)GTP to its monophosphate form. This protective mechanism prevents the misincorporation of these oxidized nucleotides into DNA and RNA. NUDX1 also has a low level of dihydroneopterin triphosphate pyrophosphatase activity in vitro and may participate in the folate synthesis pathway.	protein_coding	NUDIX HYDROLASE 1 (NUDX1)	NUDIX HYDROLASE 1 (ATNUDX1);NUDIX HYDROLASE 1 (NUDX1);NUDIX HYDROLASE 1 (NUDX1);ARABIDOPSIS THALIANA NUDIX HYDROLASE HOMOLOG 1 (atnudt1)	-1.14694	2.96909	-4.53141	5.43e-05	0.00144963	1.80979
AT2G16050	AT2G16050.1	Cysteine/Histidine-rich C1 domain family protein; CONTAINS InterPro DOMAIN/s: DC1 (InterPro:IPR004146); BEST Arabidopsis thaliana protein match is: Cysteine/Histidine-rich C1 domain family protein (TAIR:AT1G20990.1); Has 30201 Blast hits to 17322 proteins in 780 species: Archae - 12; Bacteria - 1396; Metazoa - 17338; Fungi - 3422; Plants - 5037; Viruses - 0; Other Eukaryotes - 2996 (source: NCBI …	protein_coding			-1.14931	2.30049	-4.36987	8.94e-05	0.00201595	1.38792
AT3G09440	AT3G09440.1	Heat shock protein 70 (Hsp 70) family protein; FUNCTIONS IN: ATP binding; INVOLVED IN: protein folding, response to cadmium ion, response to karrikin, response to heat; LOCATED IN: in 7 components; EXPRESSED IN: 25 plant structures; EXPRESSED DURING: 14 growth stages; CONTAINS InterPro DOMAIN/s: Heat shock protein 70, conserved site (InterPro:IPR018181), Heat shock protein Hsp70 (InterPro:IPR0010…	protein_coding			-1.15215	6.9039	-5.82971	8.96e-07	7.38e-05	5.54584
AT4G32290	AT4G32290.1	Core-2/I-branching beta-1,6-N-acetylglucosaminyltransferase family protein; FUNCTIONS IN: molecular_function unknown; INVOLVED IN: biological_process unknown; LOCATED IN: endomembrane system; EXPRESSED IN: 22 plant structures; EXPRESSED DURING: 13 growth stages; CONTAINS InterPro DOMAIN/s: Core-2/I-Branching enzyme (InterPro:IPR021141); BEST Arabidopsis thaliana protein match is: Core-2/I-branchi…	protein_coding			-1.15223	3.88596	-5.03315	1.13e-05	0.000462104	3.18307
AT3G07990	AT3G07990.1	serine carboxypeptidase-like 27 (SCPL27); FUNCTIONS IN: serine-type carboxypeptidase activity; INVOLVED IN: proteolysis; LOCATED IN: endomembrane system; EXPRESSED IN: 21 plant structures; EXPRESSED DURING: 13 growth stages; CONTAINS InterPro DOMAIN/s: Peptidase S10, serine carboxypeptidase (InterPro:IPR001563), Peptidase S10, serine carboxypeptidase, active site (InterPro:IPR018202); BEST Arabid…	protein_coding	SERINE CARBOXYPEPTIDASE-LIKE 27 (SCPL27)	SERINE CARBOXYPEPTIDASE-LIKE 27 (SCPL27)	-1.15638	3.82764	-4.92965	1.57e-05	0.000586325	2.86733
AT2G24762	AT2G24762.1	Encodes a member of the GDU (glutamine dumper) family proteins involved in amino acid export: At4g31730 (GDU1), At4g25760 (GDU2), At5g57685 (GDU3), At2g24762 (GDU4), At5g24920 (GDU5), At3g30725 (GDU6) and At5g38770 (GDU7).	protein_coding	GLUTAMINE DUMPER 4 (GDU4)	GLUTAMINE DUMPER 4 (GDU4);GLUTAMINE DUMPER 4 (AtGDU4)	-1.15709	2.08594	-3.44778	0.00137025	0.0140622	-1.26044
AT1G03130	AT1G03130.1	Encodes a protein predicted by sequence similarity with spinach PsaD to be photosystem I reaction center subunit II (PsaD2)	protein_coding	PHOTOSYSTEM I SUBUNIT D-2 (PSAD-2)	PHOTOSYSTEM I SUBUNIT D-2 (PSAD-2)	-1.15718	6.87707	-4.07267	0.000220495	0.00380735	0.352761
AT4G18290	AT4G18290.1	Encodes KAT2, a member of the Shaker family potassium ion (K+) channel. Critical to stomatal opening induced by blue light. Critical to circadian rhythm of stomatal opening. Involved in plant development in response to high light intensity. Under high light intensity, the mutant plant produced less biomass compared to the wild type. The Shaker family K+ ion channels include five groups based on p…	protein_coding	POTASSIUM CHANNEL IN ARABIDOPSIS THALIANA 2 (KAT2)	POTASSIUM CHANNEL IN ARABIDOPSIS THALIANA 2 (KAT2)	-1.15741	2.14095	-4.06059	0.000228642	0.00389182	0.376507
AT5G55730	AT5G55730.1	Encodes fasciclin-like arabinogalactan-protein 1 (Fla1). fla1 mutants show defects in shoot regeneration.	protein_coding	FASCICLIN-LIKE ARABINOGALACTAN 1 (FLA1)	FASCICLIN-LIKE ARABINOGALACTAN 1 (FLA1)	-1.15892	4.7812	-3.84638	0.000432669	0.0061689	-0.355781
AT1G49750	AT1G49750.1	Leucine-rich repeat (LRR) family protein; LOCATED IN: chloroplast; EXPRESSED IN: 22 plant structures; EXPRESSED DURING: 13 growth stages; CONTAINS InterPro DOMAIN/s: Leucine-rich repeat (InterPro:IPR001611); BEST Arabidopsis thaliana protein match is: Leucine-rich repeat (LRR) family protein (TAIR:AT3G19320.1); Has 196117 Blast hits to 67164 proteins in 2660 species: Archae - 391; Bacteria - 3519…	protein_coding			-1.159	5.39459	-3.44964	0.00136306	0.0140433	-1.44345
AT4G19420	AT4G19420.1	Pectinacetylesterase family protein; FUNCTIONS IN: carboxylesterase activity; INVOLVED IN: biological_process unknown; LOCATED IN: endomembrane system; EXPRESSED IN: 23 plant structures; EXPRESSED DURING: 13 growth stages; CONTAINS InterPro DOMAIN/s: Pectinacetylesterase (InterPro:IPR004963); BEST Arabidopsis thaliana protein match is: Pectinacetylesterase family protein (TAIR:AT4G19410.1); Has 3…	protein_coding			-1.15945	6.5297	-4.40084	8.13e-05	0.00189479	1.1765
AT5G59080	AT5G59080.1	unknown protein; FUNCTIONS IN: molecular_function unknown; INVOLVED IN: response to oxidative stress; LOCATED IN: chloroplast; EXPRESSED IN: 18 plant structures; EXPRESSED DURING: 9 growth stages; BEST Arabidopsis thaliana protein match is: unknown protein (TAIR:AT3G46880.1); Has 1807 Blast hits to 1807 proteins in 277 species: Archae - 0; Bacteria - 0; Metazoa - 736; Fungi - 347; Plants - 385; V…	protein_coding			-1.15984	4.34749	-3.37771	0.00166929	0.0162659	-1.45592
AT3G43800	AT3G43800.1	Encodes glutathione transferase belonging to the tau class of GSTs. Naming convention according to Wagner et al. (2002).	protein_coding	GLUTATHIONE S-TRANSFERASE TAU 27 (GSTU27)	GLUTATHIONE S-TRANSFERASE TAU 27 (GSTU27);GLUTATHIONE S-TRANSFERASE TAU 27 (ATGSTU27)	-1.16341	4.22462	-5.22189	6.22e-06	0.00030642	3.6852
AT3G03250	AT3G03250.1	Is thought to encode a cytosolic UDP-glucose pyrophosphorylase with strong similarity to potato UTP--glucose-1-phosphate uridylyltransferase. Downregulated by flooding.	protein_coding	UDP-GLUCOSE PYROPHOSPHORYLASE 1 (UGP1)	UDP-GLUCOSE PYROPHOSPHORYLASE 1 (AtUGP1);UDP-GLUCOSE PYROPHOSPHORYLASE (UGP);UDP-GLUCOSE PYROPHOSPHORYLASE 1 (UGP1)	-1.16436	6.44678	-5.62522	1.72e-06	0.000116238	4.91357
AT5G19140	AT5G19140.1	AILP1; FUNCTIONS IN: molecular_function unknown; INVOLVED IN: response to auxin stimulus, response to aluminum ion; LOCATED IN: plasma membrane; EXPRESSED IN: 23 plant structures; EXPRESSED DURING: 13 growth stages; BEST Arabidopsis thaliana protein match is: Aluminium induced protein with YGL and LRDR motifs (TAIR:AT5G43830.1); Has 1807 Blast hits to 1807 proteins in 277 species: Archae - 0; Bac…	protein_coding	(AILP1)	(AtAILP1); (AILP1)	-1.16514	9.14406	-6.30361	1.97e-07	2.28e-05	7.08391
AT1G12480	AT1G12480.1	Encodes a membrane protein with 10 predicted transmembrane helices. SLAC1 is a multispanning membrane protein expressed predominantly in guard cells that plays a role in regulating cellular ion homeostasis and S-type anion currents. SLAC1 is important for normal stomatal closure in response to a variety of signals including elevated CO2, ozone, ABA, darkness, and humidity. SLAC1:GFP localizes to …	protein_coding	OZONE-SENSITIVE 1 (OZS1)	CARBON DIOXIDE INSENSITIVE 3 (CDI3);OZONE-SENSITIVE 1 (OZS1);SLOW ANION CHANNEL-ASSOCIATED 1 (SLAC1);RADICAL-INDUCED CELL DEATH 3 (RCD3)	-1.16713	0.775107	-3.73738	0.000595796	0.00777686	-0.526796
AT1G73670	AT1G73670.1	member of MAP Kinase	protein_coding	MAP KINASE 15 (MPK15)	MAP KINASE 15 (MPK15);MAP KINASE 15 (ATMPK15)	-1.16823	4.44281	-6.88632	3.09e-08	6.11e-06	8.86701
AT4G23290	AT4G23290.2	Encodes a cysteine-rich receptor-like protein kinase.	protein_coding	CYSTEINE-RICH RLK (RECEPTOR-LIKE PROTEIN KINASE) 21 (CRK21)	CYSTEINE-RICH RLK (RECEPTOR-LIKE PROTEIN KINASE) 21 (CRK21)	-1.17122	1.3756	-4.57994	4.67e-05	0.00130357	1.72408
AT5G44530	AT5G44530.1	Subtilase family protein; FUNCTIONS IN: identical protein binding, serine-type endopeptidase activity; INVOLVED IN: proteolysis, negative regulation of catalytic activity; LOCATED IN: endomembrane system; EXPRESSED IN: 21 plant structures; EXPRESSED DURING: 13 growth stages; CONTAINS InterPro DOMAIN/s: Protease-associated PA (InterPro:IPR003137), Peptidase S8/S53, subtilisin/kexin/sedolisin (Inte…	protein_coding			-1.17224	3.7598	-3.95647	0.000312192	0.00485563	-0.0354509
AT4G24480	AT4G24480.1	Protein kinase superfamily protein; FUNCTIONS IN: protein serine/threonine/tyrosine kinase activity, kinase activity; INVOLVED IN: protein amino acid phosphorylation; LOCATED IN: cellular_component unknown; EXPRESSED IN: 10 plant structures; EXPRESSED DURING: 4 anthesis, LP.10 ten leaves visible, petal differentiation and expansion stage, LP.12 twelve leaves visible; CONTAINS InterPro DOMAIN/s: P…	protein_coding			-1.17361	4.57186	-3.99742	0.000276282	0.00441819	0.118262
AT4G38230	AT4G38230.2	member of Calcium Dependent Protein Kinase	protein_coding	CALCIUM-DEPENDENT PROTEIN KINASE 26 (CPK26)	CALCIUM-DEPENDENT PROTEIN KINASE 26 (CPK26)	-1.17575	2.89055	-4.16517	0.000166805	0.00316673	0.822548
AT4G30490	AT4G30490.1	AFG1-like ATPase family protein; FUNCTIONS IN: ATPase activity, ATP binding; INVOLVED IN: biological_process unknown; EXPRESSED IN: 23 plant structures; EXPRESSED DURING: 15 growth stages; CONTAINS InterPro DOMAIN/s: ATPase, AFG1-like (InterPro:IPR005654); BEST Arabidopsis thaliana protein match is: AFG1-like ATPase family protein (TAIR:AT4G28070.2); Has 30201 Blast hits to 17322 proteins in 780 …	protein_coding			-1.17662	5.57431	-6.34885	1.7e-07	2.11e-05	7.17862
AT1G58590	AT1G58590.1	Unknown gene	other_rna			-1.17699	2.67218	-3.43097	0.00143691	0.0145472	-1.24639
AT5G13210	AT5G13210.1	Uncharacterised conserved protein UCP015417, vWA; CONTAINS InterPro DOMAIN/s: Uncharacterised conserved protein UCP015417, vWA (InterPro:IPR011205), von Willebrand factor, type A (InterPro:IPR002035); BEST Arabidopsis thaliana protein match is: Uncharacterised conserved protein UCP015417, vWA (TAIR:AT3G24780.1); Has 1807 Blast hits to 1807 proteins in 277 species: Archae - 0; Bacteria - 0; Metazo…	protein_coding			-1.17708	2.4687	-2.94605	0.0054085	0.037091	-2.30639
AT4G34790	AT4G34790.1	SAUR-like auxin-responsive protein family ; FUNCTIONS IN: molecular_function unknown; INVOLVED IN: response to auxin stimulus, N-terminal protein myristoylation; LOCATED IN: chloroplast; CONTAINS InterPro DOMAIN/s: Auxin responsive SAUR protein (InterPro:IPR003676); BEST Arabidopsis thaliana protein match is: SAUR-like auxin-responsive protein family (TAIR:AT4G34810.1); Has 1373 Blast hits to 135…	protein_coding			-1.17833	0.981627	-3.71349	0.000638778	0.00821337	-0.491919
AT5G61570	AT5G61570.1	Protein kinase superfamily protein; FUNCTIONS IN: protein serine/threonine kinase activity, protein kinase activity, kinase activity, ATP binding; INVOLVED IN: protein amino acid phosphorylation; LOCATED IN: endomembrane system; EXPRESSED IN: 16 plant structures; EXPRESSED DURING: 12 growth stages; CONTAINS InterPro DOMAIN/s: Protein kinase, catalytic domain (InterPro:IPR000719), Serine/threonine…	protein_coding			-1.17968	3.56447	-4.61938	4.14e-05	0.001188	1.92922
AT2G32280	AT2G32280.1	Protein of unknown function (DUF1218); FUNCTIONS IN: molecular_function unknown; INVOLVED IN: biological_process unknown; LOCATED IN: endomembrane system; EXPRESSED IN: 18 plant structures; EXPRESSED DURING: 9 growth stages; CONTAINS InterPro DOMAIN/s: Protein of unknown function DUF1218 (InterPro:IPR009606); BEST Arabidopsis thaliana protein match is: Protein of unknown function (DUF1218) (TAIR:…	protein_coding			-1.17993	2.49017	-3.2965	0.0020939	0.0190061	-1.47735
AT1G59970	AT1G59970.1	Matrixin family protein; FUNCTIONS IN: metallopeptidase activity, metalloendopeptidase activity, zinc ion binding; INVOLVED IN: proteolysis, metabolic process; LOCATED IN: plasma membrane, anchored to membrane; EXPRESSED IN: 22 plant structures; EXPRESSED DURING: 13 growth stages; CONTAINS InterPro DOMAIN/s: Peptidase M10, metallopeptidase (InterPro:IPR001818), Peptidoglycan binding-like (InterPr…	protein_coding			-1.18307	3.04627	-4.07466	0.00021918	0.00380163	0.522236
AT3G60290	AT3G60290.1	2-oxoglutarate (2OG) and Fe(II)-dependent oxygenase superfamily protein; FUNCTIONS IN: oxidoreductase activity, acting on paired donors, with incorporation or reduction of molecular oxygen, 2-oxoglutarate as one donor, and incorporation of one atom each of oxygen into both donors, oxidoreductase activity; INVOLVED IN: response to karrikin, biosynthetic process; LOCATED IN: cellular_component unkn…	protein_coding			-1.18376	1.18512	-4.80373	2.33e-05	0.000786597	2.41324
AT1G13110	AT1G13110.1	member of CYP71B	protein_coding	"CYTOCHROME P450, FAMILY 71 SUBFAMILY B, POLYPEPTIDE 7" (CYP71B7)	"CYTOCHROME P450, FAMILY 71 SUBFAMILY B, POLYPEPTIDE 7" (CYP71B7)	-1.18404	6.47557	-4.38312	8.58e-05	0.00196302	1.16346
AT2G41475	AT2G41475.1	Embryo-specific protein 3, (ATS3); FUNCTIONS IN: molecular_function unknown; INVOLVED IN: biological_process unknown; LOCATED IN: endomembrane system; CONTAINS InterPro DOMAIN/s: Lipase/lipooxygenase, PLAT/LH2 (InterPro:IPR008976), Embryo-specific 3 (InterPro:IPR010417); BEST Arabidopsis thaliana protein match is: Embryo-specific protein 3, (ATS3) (TAIR:AT5G62200.1); Has 30201 Blast hits to 17322…	protein_coding			-1.18501	5.21134	-4.55983	4.98e-05	0.00136748	1.67011
AT2G30432	AT2G30432.1	Encodes TRICHOMELESS1 (TCL1), a single-repeat MYB-type transcription factor that negatively regulates trichome formation by suppressing GL1 (GLABRA1). In a tandem repeat with AT2g30424 and AT2g30420.	protein_coding	TRICHOMELESS1 (TCL1)	TRICHOMELESS1 (TCL1)	-1.18563	-1.20925	-2.86514	0.00668459	0.043107	-2.48306
AT3G05640	AT3G05640.1	Protein phosphatase 2C family protein; FUNCTIONS IN: protein serine/threonine phosphatase activity, catalytic activity; INVOLVED IN: response to water deprivation; LOCATED IN: cellular_component unknown; EXPRESSED IN: 22 plant structures; EXPRESSED DURING: 13 growth stages; CONTAINS InterPro DOMAIN/s: Protein phosphatase 2C-related (InterPro:IPR001932), Protein phosphatase 2C (InterPro:IPR015655)…	protein_coding			-1.18807	4.22627	-4.66887	3.55e-05	0.00106809	2.00993
AT3G45940	AT3G45940.1	Glycosyl hydrolases family 31 protein; FUNCTIONS IN: hydrolase activity, hydrolyzing O-glycosyl compounds; INVOLVED IN: carbohydrate metabolic process; LOCATED IN: endomembrane system; EXPRESSED IN: embryo, sepal, pedicel, flower; EXPRESSED DURING: 4 anthesis, C globular stage, petal differentiation and expansion stage; CONTAINS InterPro DOMAIN/s: Glycoside hydrolase, family 31 (InterPro:IPR00032…	protein_coding			-1.18899	-1.96166	-2.89425	0.00619621	0.0410286	-2.28686
AT5G65810	AT5G65810.1	Encodes a Golgi apparatus-localized protein whose expression of the CGR3 gene is correlated with that of several cell wall biosynthetic genes and that may be involved in pectin modifications.	protein_coding	COTTON GOLGI-RELATED 3 (CGR3)	COTTON GOLGI-RELATED 3 (CGR3)	-1.18949	4.83372	-5.77544	1.07e-06	8.22e-05	5.38758
AT5G18240	AT5G18240.1	Encodes MYR1 (MYR1).	protein_coding	MYB-RELATED PROTEIN 1 (MYR1)	MYB-RELATED PROTEIN 1 (MYR1);ARABIDOPSIS MYB-RELATED PROTEIN 1 (ATMYR1)	-1.18996	3.05927	-3.51396	0.00113543	0.0123335	-1.23515
AT4G22840	AT4G22840.1	Sodium Bile acid symporter family; FUNCTIONS IN: transporter activity, bile acid:sodium symporter activity; INVOLVED IN: sodium ion transport; LOCATED IN: membrane; EXPRESSED IN: 23 plant structures; EXPRESSED DURING: 14 growth stages; CONTAINS InterPro DOMAIN/s: Bile acid:sodium symporter (InterPro:IPR002657); BEST Arabidopsis thaliana protein match is: bile acid transporter 5 (TAIR:AT4G12030.2)…	protein_coding			-1.19037	2.18365	-3.10018	0.00358479	0.0275752	-1.92964
AT3G53010	AT3G53010.1	Domain of unknown function (DUF303) ; FUNCTIONS IN: molecular_function unknown; INVOLVED IN: biological_process unknown; LOCATED IN: endomembrane system; CONTAINS InterPro DOMAIN/s: Protein of unknown function DUF303, acetylesterase putative (InterPro:IPR005181); BEST Arabidopsis thaliana protein match is: Domain of unknown function (DUF303) (TAIR:AT4G34215.2); Has 339 Blast hits to 339 proteins …	protein_coding			-1.19104	0.745847	-3.54115	0.0010506	0.0116163	-0.794311
AT3G04210	AT3G04210.1	Disease resistance protein (TIR-NBS class); FUNCTIONS IN: transmembrane receptor activity, ATP binding; INVOLVED IN: signal transduction, apoptosis, defense response, innate immune response; LOCATED IN: intrinsic to membrane, endomembrane system; EXPRESSED IN: 18 plant structures; EXPRESSED DURING: 11 growth stages; CONTAINS InterPro DOMAIN/s: NB-ARC (InterPro:IPR002182), Disease resistance prote…	protein_coding			-1.19849	2.15577	-3.76954	0.000542306	0.00725736	-0.621183
AT1G67860	AT1G67860.1	unknown protein; BEST Arabidopsis thaliana protein match is: unknown protein (TAIR:AT1G67865.1); Has 13 Blast hits to 13 proteins in 2 species: Archae - 0; Bacteria - 0; Metazoa - 0; Fungi - 0; Plants - 13; Viruses - 0; Other Eukaryotes - 0 (source: NCBI BLink).	protein_coding			-1.19981	3.06567	-3.85268	0.00042469	0.00609932	-0.298252
AT5G54860	AT5G54860.1	Major facilitator superfamily protein; FUNCTIONS IN: transporter activity; INVOLVED IN: transport; LOCATED IN: endomembrane system, membrane; EXPRESSED IN: 23 plant structures; EXPRESSED DURING: 15 growth stages; CONTAINS InterPro DOMAIN/s: Major facilitator superfamily, general substrate transporter (InterPro:IPR016196), Biopterin transport-related protein BT1 (InterPro:IPR004324); BEST Arabidop…	protein_coding			-1.2033	3.44309	-4.41124	7.87e-05	0.00186978	1.38442
AT1G09390	AT1G09390.1	GDSL-like Lipase/Acylhydrolase superfamily protein; FUNCTIONS IN: hydrolase activity, acting on ester bonds, carboxylesterase activity; INVOLVED IN: glycerol biosynthetic process, lipid metabolic process; LOCATED IN: chloroplast stroma; EXPRESSED IN: 22 plant structures; EXPRESSED DURING: 13 growth stages; CONTAINS InterPro DOMAIN/s: Lipase, GDSL (InterPro:IPR001087); BEST Arabidopsis thaliana pr…	protein_coding			-1.20496	4.08286	-4.63125	3.99e-05	0.00115535	1.966
AT3G10660	AT3G10660.1	predicted to encode calcium-dependent protein kinase and is localized to the ER. Protein is myristoylated in a cell-free extract. Changing the proposed myristoylated site, G residue in the amino terminal, to A prevented the meristoylation . The G to A mutation decreased AtCPK2 membrane association by approximately 50%.	protein_coding	CALMODULIN-DOMAIN PROTEIN KINASE CDPK ISOFORM 2 (CPK2)	CALMODULIN-DOMAIN PROTEIN KINASE CDPK ISOFORM 2 (CPK2); (ATCPK2)	-1.20588	2.70439	-3.75873	0.000559757	0.00743874	-0.289941
AT5G66080	AT5G66080.1	Protein phosphatase 2C family protein; FUNCTIONS IN: protein serine/threonine phosphatase activity, catalytic activity; INVOLVED IN: protein amino acid dephosphorylation; LOCATED IN: protein serine/threonine phosphatase complex; EXPRESSED IN: 16 plant structures; EXPRESSED DURING: 10 growth stages; CONTAINS InterPro DOMAIN/s: Protein phosphatase 2C, manganese/magnesium aspartate binding site (Int…	protein_coding			-1.2061	3.68963	-3.25319	0.0023606	0.0207064	-1.68575
AT4G30610	AT4G30610.1	Encodes a secreted glycosylated serine carboxypeptidase with broad substrate preference that is involved in brassinosteroid signalling via BRI1. It is proteolytically processed in vivo by a separate as yet unidentified protease.	protein_coding	BRI1 SUPPRESSOR 1 (BRS1)	SERINE CARBOXYPEPTIDASE 24 PRECURSOR (SCPL24);BRI1 SUPPRESSOR 1 (BRS1)	-1.20716	2.76892	-3.94191	0.000326018	0.00503337	0.0272996
AT5G40670	AT5G40670.1	PQ-loop repeat family protein / transmembrane family protein; FUNCTIONS IN: molecular_function unknown; INVOLVED IN: biological_process unknown; LOCATED IN: plasma membrane, membrane; EXPRESSED IN: 24 plant structures; EXPRESSED DURING: 15 growth stages; CONTAINS InterPro DOMAIN/s: Cystinosin/ERS1p repeat (InterPro:IPR006603), Lysosomal cystine transporter (InterPro:IPR005282); Has 1807 Blast hit…	protein_coding			-1.20759	5.10464	-5.19227	6.83e-06	0.000325704	3.58887
AT3G46110	AT3G46110.1	LOCATED IN: plasma membrane; EXPRESSED IN: 19 plant structures; EXPRESSED DURING: 10 growth stages; CONTAINS InterPro DOMAIN/s: Protein of unknown function DUF966 (InterPro:IPR010369), Uncharacterised conserved protein UCP031043 (InterPro:IPR021182); BEST Arabidopsis thaliana protein match is: Domain of unknown function (DUF966) (TAIR:AT5G59790.1); Has 195 Blast hits to 168 proteins in 15 species…	protein_coding			-1.20759	1.34443	-3.1997	0.00273461	0.0228305	-1.80669
AT1G22650	AT1G22650.1	Plant neutral invertase family protein; FUNCTIONS IN: catalytic activity, beta-fructofuranosidase activity; INVOLVED IN: sucrose catabolic process, using beta-fructofuranosidase; LOCATED IN: cellular_component unknown; EXPRESSED IN: 19 plant structures; EXPRESSED DURING: 14 growth stages; CONTAINS InterPro DOMAIN/s: Plant neutral invertase (InterPro:IPR006937), Six-hairpin glycosidase-like (Inter…	protein_coding	ALKALINE/NEUTRAL INVERTASE D (A/N-InvD)	ALKALINE/NEUTRAL INVERTASE D (A/N-InvD)	-1.20931	3.34343	-3.35154	0.00179625	0.0170737	-1.46447
AT4G23790	AT4G23790.1	Encodes a member of the TBL (TRICHOME BIREFRINGENCE-LIKE) gene family containing a plant-specific DUF231 (domain of unknown function) domain. TBL gene family has 46 members, two of which (TBR/AT5G06700 and TBL3/AT5G01360) have been shown to be involved in the synthesis and deposition of secondary wall cellulose, presumably by influencing the esterification state of pectic polymers. A nomenclature…	protein_coding	TRICHOME BIREFRINGENCE-LIKE 24 (TBL24)	TRICHOME BIREFRINGENCE-LIKE 24 (TBL24)	-1.20955	3.93051	-5.70109	1.35e-06	9.68e-05	5.20758
AT3G53830	AT3G53830.1	Regulator of chromosome condensation (RCC1) family protein; CONTAINS InterPro DOMAIN/s: Regulator of chromosome condensation/beta-lactamase-inhibitor protein II (InterPro:IPR009091), Regulator of chromosome condensation, RCC1 (InterPro:IPR000408); BEST Arabidopsis thaliana protein match is: Regulator of chromosome condensation (RCC1) family protein (TAIR:AT3G55580.1); Has 18457 Blast hits to 6075…	protein_coding			-1.20955	1.47067	-3.37667	0.00167416	0.0162894	-1.29167
AT4G26990	AT4G26990.1	unknown protein; BEST Arabidopsis thaliana protein match is: unknown protein (TAIR:AT5G54920.1); Has 30201 Blast hits to 17322 proteins in 780 species: Archae - 12; Bacteria - 1396; Metazoa - 17338; Fungi - 3422; Plants - 5037; Viruses - 0; Other Eukaryotes - 2996 (source: NCBI BLink).	protein_coding			-1.21352	2.26603	-3.62049	0.000836475	0.00990049	-0.59607
AT5G39760	AT5G39760.1	homeobox protein 23 (HB23); FUNCTIONS IN: DNA binding, sequence-specific DNA binding transcription factor activity; INVOLVED IN: regulation of transcription; EXPRESSED IN: 21 plant structures; EXPRESSED DURING: 12 growth stages; CONTAINS InterPro DOMAIN/s: Homeobox domain, ZF-HD class (InterPro:IPR006455), ZF-HD homeobox protein, Cys/His-rich dimerisation domain (InterPro:IPR006456), Homeodomain-…	protein_coding	HOMEOBOX PROTEIN 23 (HB23)	ZINC FINGER HOMEODOMAIN 10 (ZHD10);HOMEOBOX PROTEIN 23 (HB23);HOMEOBOX PROTEIN 23 (AtHB23)	-1.21384	3.5634	-3.97995	0.000291083	0.00460578	0.147822
AT1G69520	AT1G69520.1	S-adenosyl-L-methionine-dependent methyltransferases superfamily protein; FUNCTIONS IN: methyltransferase activity; INVOLVED IN: metabolic process; LOCATED IN: mitochondrion; CONTAINS InterPro DOMAIN/s: Methyltransferase type 11 (InterPro:IPR013216); BEST Arabidopsis thaliana protein match is: S-adenosyl-L-methionine-dependent methyltransferases superfamily protein (TAIR:AT1G69526.2); Has 9433 Bl…	protein_coding			-1.21414	1.41486	-2.7965	0.00798206	0.0490918	-2.73521
AT4G34060	AT4G34060.1	Encodes a protein with 5-meC and thymine-DNA glycosylase activity with a preference for CpG and CpHpG sequences. Involved in maintaining methylation marks.	protein_coding	DEMETER-LIKE PROTEIN 3 (DML3)	DEMETER-LIKE PROTEIN 3 (DML3)	-1.22211	0.0944803	-3.42343	0.00146783	0.0147624	-1.17006
AT5G15490	AT5G15490.1	Encodes one of four UDP-glucose dehydrogenase UGD) genes. Mutation of this gene in combination with UGD2 leads to swollen plant cell walls and severe developmental defects associated with changes in pectic polysaccharides.	protein_coding	UDP-GLUCOSE DEHYDROGENASE 3 (UGD3)	UDP-GLUCOSE DEHYDROGENASE 3 (UGD3)	-1.22346	5.65834	-5.40924	3.43e-06	0.000192469	4.24928
AT4G27730	AT4G27730.1	oligopeptide transporter	protein_coding	OLIGOPEPTIDE TRANSPORTER 1 (OPT6)	ARABIDOPSIS THALIANA OLIGOPEPTIDE TRANSPORTER 6 (ATOPT6);OLIGOPEPTIDE TRANSPORTER 1 (OPT6)	-1.22424	4.14547	-4.29909	0.000111009	0.00236141	0.962645
AT2G46870	AT2G46870.1	NGATHA1 (NGA1); CONTAINS InterPro DOMAIN/s: Transcriptional factor B3 (InterPro:IPR003340); BEST Arabidopsis thaliana protein match is: AP2/B3-like transcriptional factor family protein (TAIR:AT3G61970.1); Has 1372 Blast hits to 1367 proteins in 72 species: Archae - 0; Bacteria - 0; Metazoa - 0; Fungi - 0; Plants - 1372; Viruses - 0; Other Eukaryotes - 0 (source: NCBI BLink).	protein_coding	NGATHA1 (NGA1)	NGATHA1 (NGA1)	-1.22742	3.84091	-4.76145	2.66e-05	0.000861836	2.35418
AT4G12880	AT4G12880.1	early nodulin-like protein 19 (ENODL19); FUNCTIONS IN: electron carrier activity, copper ion binding; LOCATED IN: apoplast; EXPRESSED IN: 22 plant structures; EXPRESSED DURING: 13 growth stages; CONTAINS InterPro DOMAIN/s: Plastocyanin-like (InterPro:IPR003245), Cupredoxin (InterPro:IPR008972); BEST Arabidopsis thaliana protein match is: early nodulin-like protein 17 (TAIR:AT5G15350.1); Has 1342 …	protein_coding	EARLY NODULIN-LIKE PROTEIN 19 (ENODL19)	EARLY NODULIN-LIKE PROTEIN 19 (ENODL19); (AtENODL19)	-1.2275	5.13452	-3.74292	0.000586232	0.00769801	-0.627457
AT4G38550	AT4G38550.1	Arabidopsis phospholipase-like protein (PEARLI 4) family; LOCATED IN: chloroplast; EXPRESSED IN: 21 plant structures; EXPRESSED DURING: 13 growth stages; CONTAINS InterPro DOMAIN/s: Phospholipase-like, arabidopsis (InterPro:IPR007942); BEST Arabidopsis thaliana protein match is: Arabidopsis phospholipase-like protein (PEARLI 4) family (TAIR:AT2G20950.1); Has 2973 Blast hits to 2400 proteins in 34…	protein_coding			-1.22795	6.60977	-4.80664	2.31e-05	0.000783231	2.43222
AT5G58070	AT5G58070.1	Encodes a temperature-induced lipocalin TIL1. Involved in thermotolerance. Peripherally associated with plasma membrane.	protein_coding	TEMPERATURE-INDUCED LIPOCALIN (TIL)	TEMPERATURE-INDUCED LIPOCALIN (TIL);TEMPERATURE-INDUCED LIPOCALIN (ATTIL)	-1.2304	6.61544	-5.27964	5.18e-06	0.000268413	3.84903
AT4G31620	AT4G31620.1	Transcriptional factor B3 family protein; FUNCTIONS IN: DNA binding, sequence-specific DNA binding transcription factor activity; INVOLVED IN: regulation of transcription, DNA-dependent; LOCATED IN: cellular_component unknown; CONTAINS InterPro DOMAIN/s: Transcriptional factor B3 (InterPro:IPR003340); BEST Arabidopsis thaliana protein match is: Transcriptional factor B3 family protein (TAIR:AT4G3…	protein_coding			-1.23144	0.877015	-3.03563	0.00426377	0.0312265	-2.02554
AT4G35320	AT4G35320.1	unknown protein; BEST Arabidopsis thaliana protein match is: unknown protein (TAIR:AT2G17300.1); Has 30201 Blast hits to 17322 proteins in 780 species: Archae - 12; Bacteria - 1396; Metazoa - 17338; Fungi - 3422; Plants - 5037; Viruses - 0; Other Eukaryotes - 2996 (source: NCBI BLink).	protein_coding			-1.23258	3.61434	-2.95472	0.00528627	0.0364758	-2.40724
AT1G36370	AT1G36370.1	Encodes a putative serine hydroxymethyltransferase.	protein_coding	SERINE HYDROXYMETHYLTRANSFERASE 7 (SHM7)	SERINE HYDROXYMETHYLTRANSFERASE 7 (SHM7)	-1.23296	5.0306	-4.68036	3.42e-05	0.00104248	2.04843
AT4G27900	AT4G27900.1	CCT motif family protein; FUNCTIONS IN: molecular_function unknown; INVOLVED IN: biological_process unknown; LOCATED IN: cellular_component unknown; EXPRESSED IN: 23 plant structures; EXPRESSED DURING: 13 growth stages; CONTAINS InterPro DOMAIN/s: CCT domain (InterPro:IPR010402); BEST Arabidopsis thaliana protein match is: CCT motif family protein (TAIR:AT5G53420.1); Has 1589 Blast hits to 1589 p…	protein_coding			-1.23487	4.1636	-4.64082	3.87e-05	0.00113877	1.89185
AT1G75280	AT1G75280.1	isoflavone reductase, putative, identical to SP:P52577 Isoflavone reductase homolog P3 (EC 1.3.1.-) {Arabidopsis thaliana}; contains Pfam profile PF02716: isoflavone reductase. Involved in response to oxidative stress.	protein_coding			-1.23518	5.17109	-3.85856	0.000417387	0.00601914	-0.375722
AT5G10260	AT5G10260.1	RAB GTPase homolog H1E (RABH1e); FUNCTIONS IN: GTP binding; INVOLVED IN: protein transport, small GTPase mediated signal transduction; EXPRESSED IN: 15 plant structures; EXPRESSED DURING: 6 growth stages; CONTAINS InterPro DOMAIN/s: Ras GTPase (InterPro:IPR001806), Small GTP-binding protein (InterPro:IPR005225), Small GTPase (InterPro:IPR020851), Ras (InterPro:IPR013753), Ras small GTPase, Rab ty…	protein_coding	RAB GTPASE HOMOLOG H1E (RABH1e)	RAB GTPASE HOMOLOG H1E (AtRABH1e);RAB GTPASE HOMOLOG H1E (RABH1e)	-1.23535	0.463745	-2.8367	0.00719632	0.0455261	-2.43244
AT1G14250	AT1G14250.1	GDA1/CD39 nucleoside phosphatase family protein; FUNCTIONS IN: hydrolase activity; INVOLVED IN: biological_process unknown; LOCATED IN: vacuole; EXPRESSED IN: male gametophyte, cultured cell, pollen tube; EXPRESSED DURING: L mature pollen stage, M germinated pollen stage; CONTAINS InterPro DOMAIN/s: Nucleoside phosphatase GDA1/CD39 (InterPro:IPR000407); BEST Arabidopsis thaliana protein match is:…	protein_coding			-1.23544	0.661659	-3.29006	0.00213165	0.0192096	-1.92473
AT2G34510	AT2G34510.1	FUNCTIONS IN: molecular_function unknown; INVOLVED IN: biological_process unknown; LOCATED IN: anchored to membrane; EXPRESSED IN: 20 plant structures; EXPRESSED DURING: 14 growth stages; CONTAINS InterPro DOMAIN/s: Protein of unknown function DUF642 (InterPro:IPR006946), Galactose-binding domain-like (InterPro:IPR008979); BEST Arabidopsis thaliana protein match is: Protein of unknown function, D…	protein_coding			-1.23607	5.24031	-4.09497	0.000206183	0.00365028	0.327436
AT4G00880	AT4G00880.1	SAUR-like auxin-responsive protein family ; CONTAINS InterPro DOMAIN/s: Auxin responsive SAUR protein (InterPro:IPR003676); BEST Arabidopsis thaliana protein match is: SAUR-like auxin-responsive protein family (TAIR:AT2G46690.1); Has 1421 Blast hits to 1407 proteins in 27 species: Archae - 0; Bacteria - 0; Metazoa - 0; Fungi - 0; Plants - 1420; Viruses - 0; Other Eukaryotes - 1 (source: NCBI BLin…	protein_coding			-1.23986	1.79892	-2.91446	0.0058768	0.0394234	-2.74497
AT3G15115	AT3G15115.1	unknown protein; BEST Arabidopsis thaliana protein match is: unknown protein (TAIR:AT1G53180.1); Has 47 Blast hits to 47 proteins in 15 species: Archae - 0; Bacteria - 0; Metazoa - 13; Fungi - 0; Plants - 30; Viruses - 0; Other Eukaryotes - 4 (source: NCBI BLink).	protein_coding			-1.23995	2.56548	-3.25129	0.002373	0.0207521	-1.51894
AT4G14680	AT4G14680.1	ATP sulfurylase	protein_coding	(APS3)	(APS3)	-1.24035	3.97191	-4.96689	1.39e-05	0.000540716	2.92245
AT3G51660	AT3G51660.1	Tautomerase/MIF superfamily protein; FUNCTIONS IN: molecular_function unknown; INVOLVED IN: inflammatory response, response to other organism; LOCATED IN: peroxisome; EXPRESSED IN: 20 plant structures; EXPRESSED DURING: 13 growth stages; CONTAINS InterPro DOMAIN/s: Tautomerase (InterPro:IPR014347), Macrophage migration inhibitory factor (InterPro:IPR001398); BEST Arabidopsis thaliana protein matc…	protein_coding			-1.2478	3.63056	-6.26503	2.23e-07	2.5e-05	6.93232
AT4G24015	AT4G24015.1	RING/U-box superfamily protein; FUNCTIONS IN: zinc ion binding; INVOLVED IN: biological_process unknown; LOCATED IN: cellular_component unknown; CONTAINS InterPro DOMAIN/s: Zinc finger, RING-type (InterPro:IPR001841); BEST Arabidopsis thaliana protein match is: RING/U-box superfamily protein (TAIR:AT4G10150.1); Has 35333 Blast hits to 34131 proteins in 2444 species: Archae - 798; Bacteria - 22429…	protein_coding			-1.24861	3.18607	-7.02699	1.98e-08	4.37e-06	9.29683
AT2G21050	AT2G21050.1	Encodes LAX2 (LIKE AUXIN RESISTANT), a member of the AUX1 LAX family of auxin influx carriers. Required for the establishment of embryonic root cell organization.	protein_coding	LIKE AUXIN RESISTANT 2 (LAX2)	LIKE AUXIN RESISTANT 2 (LAX2)	-1.24895	4.04608	-5.29596	4.92e-06	0.000258038	3.99995
AT2G38995	AT2G38995.1	O-acyltransferase (WSD1-like) family protein; CONTAINS InterPro DOMAIN/s: O-acyltransferase, WSD1, C-terminal (InterPro:IPR009721), O-acyltransferase, WSD1, N-terminal (InterPro:IPR004255); BEST Arabidopsis thaliana protein match is: O-acyltransferase (WSD1-like) family protein (TAIR:AT5G37300.1); Has 952 Blast hits to 940 proteins in 139 species: Archae - 2; Bacteria - 706; Metazoa - 10; Fungi -…	protein_coding			-1.24977	-1.91117	-4.13641	0.000181958	0.00336022	0.698038
AT3G62780	AT3G62780.1	Calcium-dependent lipid-binding (CaLB domain) family protein; CONTAINS InterPro DOMAIN/s: C2 membrane targeting protein (InterPro:IPR018029), C2 calcium/lipid-binding domain, CaLB (InterPro:IPR008973), C2 calcium-dependent membrane targeting (InterPro:IPR000008); BEST Arabidopsis thaliana protein match is: Calcium-dependent lipid-binding (CaLB domain) family protein (TAIR:AT3G16510.1); Has 675 Bl…	protein_coding			-1.25562	-0.475577	-3.5401	0.00105376	0.011639	-0.801602
AT3G29030	AT3G29030.1	Encodes an expansin. Naming convention from the Expansin Working Group (Kende et al, 2004. Plant Mol Bio)	protein_coding	EXPANSIN A5 (EXPA5)	ARABIDOPSIS THALIANA EXPANSIN 5 (ATEXP5);ARABIDOPSIS THALIANA EXPANSIN A5 (ATEXPA5); (ATHEXP ALPHA 1.4);EXPANSIN 5 (EXP5);EXPANSIN A5 (EXPA5)	-1.25566	3.5122	-3.11402	0.0034532	0.0267915	-2.3638
AT5G60860	AT5G60860.1	RAB GTPase homolog A1F (RABA1f); FUNCTIONS IN: GTP binding; INVOLVED IN: protein transport, small GTPase mediated signal transduction; EXPRESSED IN: 23 plant structures; EXPRESSED DURING: 15 growth stages; CONTAINS InterPro DOMAIN/s: Ras GTPase (InterPro:IPR001806), Small GTP-binding protein (InterPro:IPR005225), Small GTPase (InterPro:IPR020851), Ras (InterPro:IPR013753), Ras small GTPase, Rab t…	protein_coding	RAB GTPASE HOMOLOG A1F (RABA1f)	RAB GTPASE HOMOLOG A1F (RABA1f);RAB GTPASE HOMOLOG A1F (AtRABA1f)	-1.25666	3.79325	-4.09766	0.000204519	0.00362693	0.336161
AT2G37380	AT2G37380.1	Encodes a member of the MAKR (MEMBRANE-ASSOCIATED KINASE REGULATOR) gene family. MAKRs have putative kinase interacting motifs and membrane localization signals. Known members include: AT5G26230 (MAKR1), AT1G64080 (MAKR2), AT2G37380 (MAKR3), AT2G39370 (MAKR4), AT5G52870 (MAKR5) and AT5G52900 (MAKR6).	protein_coding	MEMBRANE-ASSOCIATED KINASE REGULATOR 3 (MAKR3)	MEMBRANE-ASSOCIATED KINASE REGULATOR 3 (MAKR3)	-1.25834	0.514448	-2.93796	0.00552508	0.0376901	-2.2192
AT2G18100	AT2G18100.1	Protein of unknown function (DUF726); CONTAINS InterPro DOMAIN/s: Protein of unknown function DUF726 (InterPro:IPR007941); BEST Arabidopsis thaliana protein match is: Protein of unknown function (DUF726) (TAIR:AT4G36210.3); Has 35333 Blast hits to 34131 proteins in 2444 species: Archae - 798; Bacteria - 22429; Metazoa - 974; Fungi - 991; Plants - 531; Viruses - 0; Other Eukaryotes - 9610 (source:…	protein_coding			-1.26104	1.03468	-3.40433	0.001549	0.0153614	-1.12366
AT4G01920	AT4G01920.1	Cysteine/Histidine-rich C1 domain family protein; INVOLVED IN: intracellular signaling pathway; LOCATED IN: cellular_component unknown; EXPRESSED IN: 13 plant structures; EXPRESSED DURING: 8 growth stages; CONTAINS InterPro DOMAIN/s: Protein kinase C-like, phorbol ester/diacylglycerol binding (InterPro:IPR002219), DC1 (InterPro:IPR004146), C1-like (InterPro:IPR011424); BEST Arabidopsis thaliana p…	protein_coding			-1.26306	1.47503	-3.65847	0.000749489	0.0091282	-0.553423
AT5G24470	AT5G24470.1	Encodes a pseudo-response regulator whose mutation affects various circadian-associated biological events such as flowering time in the long-day photoperiod conditions, red light sensitivity of seedlings during early photomorphogenesis, and the period of free-running rhythms of certain clock-controlled genes including CCA1 and APRR1/TOC1 in constant white light. Acts as transcriptional repressor …	protein_coding	PSEUDO-RESPONSE REGULATOR 5 (PRR5)	PSEUDO-RESPONSE REGULATOR 5 (PRR5);PSEUDO-RESPONSE REGULATOR 5 (APRR5)	-1.26517	5.13528	-4.63654	3.92e-05	0.00114708	1.91768
AT4G15500	AT4G15500.1	Encodes a protein that might have sinapic acid:UDP-glucose glucosyltransferase activity.	protein_coding	(UGT84A4)	(UGT84A4)	-1.26531	1.1819	-2.97604	0.00499654	0.0350522	-2.27394
AT2G42320	AT2G42320.1	nucleolar protein gar2-related; BEST Arabidopsis thaliana protein match is: unknown protein (TAIR:AT3G57780.1); Has 15829 Blast hits to 1361 proteins in 222 species: Archae - 4; Bacteria - 14530; Metazoa - 601; Fungi - 195; Plants - 122; Viruses - 6; Other Eukaryotes - 371 (source: NCBI BLink).	protein_coding			-1.26614	5.75122	-6.39329	1.48e-07	1.87e-05	7.30549
AT3G23810	AT3G23810.1	S-adenosyl-l-homocysteine (SAH) hydrolase 2 (SAHH2); FUNCTIONS IN: adenosylhomocysteinase activity; INVOLVED IN: one-carbon metabolic process; LOCATED IN: plasma membrane, vacuole, membrane; EXPRESSED IN: 33 plant structures; EXPRESSED DURING: 15 growth stages; CONTAINS InterPro DOMAIN/s: S-adenosyl-L-homocysteine hydrolase (InterPro:IPR000043), S-adenosyl-L-homocysteine hydrolase, conserved site…	protein_coding	S-ADENOSYL-L-HOMOCYSTEINE (SAH) HYDROLASE 2 (SAHH2)	S-ADENOSYL-L-HOMOCYSTEINE (SAH) HYDROLASE 2 (SAHH2);S-ADENOSYL-L-HOMOCYSTEINE (SAH) HYDROLASE 2 (ATSAHH2)	-1.2665	6.5383	-2.87837	0.00645836	0.0420745	-2.91117
AT5G61660	AT5G61660.1	glycine-rich protein; FUNCTIONS IN: molecular_function unknown; INVOLVED IN: biological_process unknown; LOCATED IN: endomembrane system; EXPRESSED IN: 19 plant structures; EXPRESSED DURING: 9 growth stages; Has 30201 Blast hits to 17322 proteins in 780 species: Archae - 12; Bacteria - 1396; Metazoa - 17338; Fungi - 3422; Plants - 5037; Viruses - 0; Other Eukaryotes - 2996 (source: NCBI BLink).	protein_coding			-1.26668	5.42951	-4.32191	0.000103531	0.00224107	0.947593
AT5G44110	AT5G44110.1	Encodes a member of the NAP subfamily of ABC transporters.	protein_coding	ATP-BINDING CASSETTE A21 (ABCI21)	(ATPOP1); (POP1);ATP-BINDING CASSETTE A21 (ABCI21);ARABIDOPSIS THALIANA NON-INTRINSIC ABC PROTEIN (ATNAP2)	-1.26688	2.22813	-5.13033	8.31e-06	0.000372982	3.57611
AT3G50740	AT3G50740.1	UGT72E1 is an UDPG:coniferyl alcohol glucosyltransferase which specifically glucosylates sinapyl- and coniferyl aldehydes. The enzyme is thought to be involved in lignin metabolism.	protein_coding	UDP-GLUCOSYL TRANSFERASE 72E1 (UGT72E1)	UDP-GLUCOSYL TRANSFERASE 72E1 (UGT72E1)	-1.27194	4.9196	-3.95104	0.000317276	0.00492011	-0.0822164
AT1G23340	AT1G23340.1	Protein of Unknown Function (DUF239); FUNCTIONS IN: molecular_function unknown; INVOLVED IN: biological_process unknown; LOCATED IN: endomembrane system; EXPRESSED IN: 12 plant structures; EXPRESSED DURING: 6 growth stages; CONTAINS InterPro DOMAIN/s: Protein of unknown function DUF239, plant (InterPro:IPR004314); BEST Arabidopsis thaliana protein match is: Protein of Unknown Function (DUF239) (T…	protein_coding			-1.273	1.07463	-3.12923	0.00331376	0.0260206	-1.8001
AT5G23810	AT5G23810.1	Encodes nonfunctional amino acid transporter. AAP7 is the most distantly related member of the AAP family, a group of well characterized amino acid transporters within the ATF1 superfamily. Expression of this gene has not been detected with RNA gel blots or promoter GUS studies.	protein_coding	AMINO ACID PERMEASE 7 (AAP7)	AMINO ACID PERMEASE 7 (AAP7)	-1.27477	1.48223	-3.13054	0.00330201	0.0259575	-1.88301
AT4G08685	AT4G08685.1	Encodes a protein, expressed in leaves, with similarity to pollen allergens.	protein_coding	(SAH7)	(SAH7)	-1.27553	5.18479	-5.26607	5.41e-06	0.000275476	3.80288
AT2G14890	AT2G14890.1	putative proline-rich protein (At2g14890) mRNA, complete	protein_coding	ARABINOGALACTAN PROTEIN 9 (AGP9)	ARABINOGALACTAN PROTEIN 9 (AGP9)	-1.27696	7.28986	-4.63642	3.92e-05	0.00114708	1.88944
AT3G45860	AT3G45860.1	Encodes a cysteine-rich receptor-like protein kinase. Involved in programmed cell death and defense response to pathogen.	protein_coding	CYSTEINE-RICH RLK (RECEPTOR-LIKE PROTEIN KINASE) 4 (CRK4)	CYSTEINE-RICH RLK (RECEPTOR-LIKE PROTEIN KINASE) 4 (CRK4)	-1.27722	0.0122041	-2.98869	0.00483169	0.0342393	-2.45518
AT3G16180	AT3G16180.1	Major facilitator superfamily protein; FUNCTIONS IN: transporter activity; INVOLVED IN: oligopeptide transport; LOCATED IN: plasma membrane, membrane; EXPRESSED IN: 22 plant structures; EXPRESSED DURING: 13 growth stages; CONTAINS InterPro DOMAIN/s: Oligopeptide transporter (InterPro:IPR000109), Major facilitator superfamily, general substrate transporter (InterPro:IPR016196); BEST Arabidopsis th…	protein_coding			-1.279	5.69512	-5.26368	5.45e-06	0.000276239	3.79504
AT1G53500	AT1G53500.1	encodes a putative NDP-L-rhamnose synthase, an enzyme required for the synthesis of the pectin rhamnogalacturonan I, the major component of Arabidopsis mucilage. Gene is involved in seed coat mucilage cell development. Mutant analyses suggest that MUM4 is required for complete mucilage synthesis, cytoplasmic rearrangement and seed coat development.	protein_coding	MUCILAGE-MODIFIED 4 (MUM4)	ARABIDOPSIS THALIANA MUCILAGE-MODIFIED 4 (ATMUM4);MUCILAGE-MODIFIED 4 (MUM4);RHAMNOSE BIOSYNTHESIS 2 (RHM2);ARABIDOPSIS THALIANA RHAMNOSE BIOSYNTHESIS 2 (ATRHM2)	-1.28141	5.92543	-6.47472	1.14e-07	1.58e-05	7.55678
AT1G17190	AT1G17190.1	Encodes glutathione transferase belonging to the tau class of GSTs. Naming convention according to Wagner et al. (2002).	protein_coding	GLUTATHIONE S-TRANSFERASE TAU 26 (GSTU26)	GLUTATHIONE S-TRANSFERASE TAU 26 (ATGSTU26);GLUTATHIONE S-TRANSFERASE TAU 26 (GSTU26)	-1.28209	3.61473	-3.69976	0.000664829	0.0084347	-0.522686
AT4G39800	AT4G39800.1	** Referred to as MIPS2 in Mitsuhashi et al 2008. myo-inositol-1-phosphate synthase isoform 1.Expressed in leaf, root and silique. Immunolocalization experiments with an antibody recognizing MIPS1, MIPS2, and MIPS3 showed endosperm localization.	protein_coding	D-MYO-INOSITOL 3-PHOSPHATE SYNTHASE 1 (MIPS1)	MYO-INOSITOL-1-PHOSPHATE SYNTHASE 1 (MIPS1);MYO-INOSITOL-1-PHOSPHATE SYNTHASE 1 (ATMIPS1);MYO-INOSITOL-1-PHOSTPATE SYNTHASE 2 (ATMIPS2);MYO-INOSITOL-1-PHOSPHATE SYNTHASE 2 (MIPS2);INOSITOL 3-PHOSPHATE SYNTHASE 1 (ATIPS1);D-MYO-INOSITOL 3-PHOSPHATE SYNTHASE 1 (MIPS1); (MI-1-P SYNTHASE)	-1.28264	6.27077	-7.93246	1.17e-09	5.74e-07	12.0278
AT5G64850	AT5G64850.1	FUNCTIONS IN: molecular_function unknown; INVOLVED IN: biological_process unknown; LOCATED IN: plasma membrane; EXPRESSED IN: 22 plant structures; EXPRESSED DURING: 13 growth stages; CONTAINS InterPro DOMAIN/s: RPM1-interacting protein 4, defence response (InterPro:IPR008700); BEST Arabidopsis thaliana protein match is: unknown protein (TAIR:AT5G09960.1); Has 30201 Blast hits to 17322 proteins in…	protein_coding			-1.2828	4.09112	-3.77288	0.000537036	0.00720982	-0.619826
AT2G18860	AT2G18860.1	Syntaxin/t-SNARE family protein; INVOLVED IN: Golgi vesicle transport, vesicle-mediated transport; LOCATED IN: nucleus; CONTAINS InterPro DOMAIN/s: t-SNARE (InterPro:IPR010989), Syntaxin 6, N-terminal (InterPro:IPR015260); BEST Arabidopsis thaliana protein match is: Syntaxin/t-SNARE family protein (TAIR:AT4G30240.1); Has 122 Blast hits to 122 proteins in 15 species: Archae - 0; Bacteria - 2; Meta…	protein_coding			-1.28337	4.28183	-6.90787	2.88e-08	5.88e-06	8.91225
AT4G24450	AT4G24450.1	"phosphoglucan, water dikinase" (PWD); FUNCTIONS IN: kinase activity, ATP binding; INVOLVED IN: phosphorylation; LOCATED IN: chloroplast envelope; EXPRESSED IN: 22 plant structures; EXPRESSED DURING: 14 growth stages; CONTAINS InterPro DOMAIN/s: Pyruvate phosphate dikinase, PEP/pyruvate-binding (InterPro:IPR002192); BEST Arabidopsis thaliana protein match is: Pyruvate phosphate dikinase, PEP/pyru…	protein_coding	PHOSPHOGLUCAN, WATER DIKINASE (PWD)	(ATGWD2);PHOSPHOGLUCAN, WATER DIKINASE (PWD); (GWD3)	-1.28514	3.73444	-3.90337	0.000365555	0.00548255	-0.0820566
AT1G08500	AT1G08500.1	early nodulin-like protein 18 (ENODL18); FUNCTIONS IN: electron carrier activity, copper ion binding; LOCATED IN: anchored to membrane; EXPRESSED IN: 14 plant structures; EXPRESSED DURING: LP.06 six leaves visible, 4 anthesis, petal differentiation and expansion stage, LP.08 eight leaves visible, E expanded cotyledon stage; CONTAINS InterPro DOMAIN/s: Plastocyanin-like (InterPro:IPR003245), Cupre…	protein_coding	EARLY NODULIN-LIKE PROTEIN 18 (ENODL18)	EARLY NODULIN-LIKE PROTEIN 18 (ENODL18); (AtENODL18)	-1.28733	2.82735	-3.84835	0.000430154	0.00614417	-0.0141153
AT5G21482	AT5G21482.1	This gene used to be called AtCKX5. It encodes a protein whose sequence is similar to cytokinin oxidase/dehydrogenase, which catalyzes the degradation of cytokinins.	protein_coding	CYTOKININ OXIDASE 7 (CKX7)	ARABIDOPSIS THALIANA CYTOKININ OXIDASE 5 (ATCKX5);CYTOKININ OXIDASE 7 (CKX7)	-1.28773	3.13952	-5.80299	9.76e-07	7.81e-05	5.50636
AT2G18350	AT2G18350.1	homeobox protein 24 (HB24); FUNCTIONS IN: DNA binding, sequence-specific DNA binding transcription factor activity; INVOLVED IN: regulation of transcription; LOCATED IN: cellular_component unknown; EXPRESSED IN: 19 plant structures; EXPRESSED DURING: 12 growth stages; CONTAINS InterPro DOMAIN/s: Homeobox domain, ZF-HD class (InterPro:IPR006455), ZF-HD homeobox protein, Cys/His-rich dimerisation d…	protein_coding	HOMEOBOX PROTEIN 24 (HB24)	HOMEOBOX PROTEIN 24 (HB24);HOMEOBOX PROTEIN 24 (AtHB24);ZINC FINGER HOMEODOMAIN 6 (ZHD6)	-1.28868	3.29233	-6.11634	3.58e-07	3.62e-05	6.49996
AT5G25610	AT5G25610.1	responsive to dehydration 22 (RD22) mediated by ABA	protein_coding	RESPONSIVE TO DESSICATION 22 (RD22)	RESPONSIVE TO DESSICATION 22 (RD22); (ATRD22)	-1.29133	6.89413	-5.43013	3.21e-06	0.000182518	4.31537
AT2G02020	AT2G02020.1	Major facilitator superfamily protein; FUNCTIONS IN: transporter activity; INVOLVED IN: oligopeptide transport; LOCATED IN: membrane; EXPRESSED IN: 6 plant structures; EXPRESSED DURING: LP.06 six leaves visible; CONTAINS InterPro DOMAIN/s: PTR2 family proton/oligopeptide symporter, conserved site (InterPro:IPR018456), Oligopeptide transporter (InterPro:IPR000109), Major facilitator superfamily, g…	protein_coding	PEPTIDE TRANSPORTER 4 (PTR4)	(AtPTR4);PEPTIDE TRANSPORTER 4 (PTR4)	-1.29148	2.73202	-5.56787	2.07e-06	0.000129977	4.78364
AT1G67870	AT1G67870.1	glycine-rich protein; Has 8710 Blast hits to 3981 proteins in 499 species: Archae - 16; Bacteria - 1349; Metazoa - 4702; Fungi - 419; Plants - 500; Viruses - 11; Other Eukaryotes - 1713 (source: NCBI BLink).	protein_coding			-1.29456	6.48596	-5.07576	9.88e-06	0.000419092	3.23504
AT5G01210	AT5G01210.1	HXXXD-type acyl-transferase family protein; FUNCTIONS IN: transferase activity, transferring acyl groups other than amino-acyl groups, transferase activity; INVOLVED IN: biological_process unknown; LOCATED IN: cellular_component unknown; EXPRESSED IN: 22 plant structures; EXPRESSED DURING: 13 growth stages; CONTAINS InterPro DOMAIN/s: Transferase (InterPro:IPR003480); BEST Arabidopsis thaliana pr…	protein_coding			-1.29496	6.1786	-4.28168	0.00011707	0.00244345	0.901436
AT1G68470	AT1G68470.1	Exostosin family protein; FUNCTIONS IN: catalytic activity; INVOLVED IN: biological_process unknown; LOCATED IN: membrane; EXPRESSED IN: 18 plant structures; EXPRESSED DURING: 13 growth stages; CONTAINS InterPro DOMAIN/s: Exostosin-like (InterPro:IPR004263); BEST Arabidopsis thaliana protein match is: Exostosin family protein (TAIR:AT2G20370.1); Has 782 Blast hits to 782 proteins in 34 species: A…	protein_coding			-1.29545	-0.135279	-3.1928	0.00278678	0.0230633	-1.71255
AT3G47510	AT3G47510.1	unknown protein; FUNCTIONS IN: molecular_function unknown; INVOLVED IN: biological_process unknown; LOCATED IN: endomembrane system; EXPRESSED IN: 19 plant structures; EXPRESSED DURING: 11 growth stages; Has 15 Blast hits to 15 proteins in 7 species: Archae - 0; Bacteria - 0; Metazoa - 0; Fungi - 0; Plants - 15; Viruses - 0; Other Eukaryotes - 0 (source: NCBI BLink).	protein_coding			-1.29845	2.79279	-2.89926	0.00611551	0.0406481	-2.52038
AT3G28007	AT3G28007.1	Nodulin MtN3 family protein; LOCATED IN: endomembrane system, integral to membrane, membrane; EXPRESSED IN: 15 plant structures; EXPRESSED DURING: 8 growth stages; CONTAINS InterPro DOMAIN/s: MtN3/saliva-related transmembrane protein, conserved region (InterPro:IPR018169), RAG1-activating protein 1 homologue (InterPro:IPR018179), RAG1-activating protein-1-related (InterPro:IPR004316); BEST Arabid…	protein_coding	(SWEET4)	(SWEET4); (AtSWEET4)	-1.29906	0.371904	-4.28613	0.000115489	0.00242251	0.923347
AT2G41870	AT2G41870.1	Remorin family protein; CONTAINS InterPro DOMAIN/s: Remorin, C-terminal (InterPro:IPR005516); BEST Arabidopsis thaliana protein match is: Remorin family protein (TAIR:AT3G57540.1); Has 469 Blast hits to 467 proteins in 36 species: Archae - 0; Bacteria - 7; Metazoa - 9; Fungi - 6; Plants - 437; Viruses - 0; Other Eukaryotes - 10 (source: NCBI BLink).	protein_coding			-1.30282	3.30298	-5.06051	1.04e-05	0.000437146	3.30175
AT2G46535	AT2G46535.1	unknown protein; CONTAINS InterPro DOMAIN/s: Protein of unknown function DUF688 (InterPro:IPR007789); BEST Arabidopsis thaliana protein match is: Protein of unknown function (DUF688) (TAIR:AT3G61840.1); Has 48 Blast hits to 48 proteins in 8 species: Archae - 0; Bacteria - 0; Metazoa - 0; Fungi - 0; Plants - 48; Viruses - 0; Other Eukaryotes - 0 (source: NCBI BLink).	protein_coding			-1.30325	0.984756	-3.23292	0.00249623	0.0215074	-1.57205
AT4G38740	AT4G38740.1	Encodes cytosolic cyclophilin ROC1.	protein_coding	ROTAMASE CYP 1 (ROC1)	ROTAMASE CYP 1 (ROC1)	-1.30404	6.45395	-6.90918	2.87e-08	5.88e-06	8.90697
AT3G10120	AT3G10120.1	unknown protein; BEST Arabidopsis thaliana protein match is: unknown protein (TAIR:AT5G03890.1); Has 57 Blast hits to 57 proteins in 10 species: Archae - 0; Bacteria - 0; Metazoa - 0; Fungi - 0; Plants - 57; Viruses - 0; Other Eukaryotes - 0 (source: NCBI BLink).	protein_coding			-1.30561	3.39179	-3.22878	0.00252481	0.0216913	-1.86923
AT5G15160	AT5G15160.1	BNQ2 belongs to a family of atypical non-DNA binding basic helix-loop-helix (bHLH) proteins that heterodimerize with and negatively regulate bHLH transcription factors. Directly and negatively regulated by AP3 and PI in petals.Required for appropriate regulation of flowering time.	protein_coding	BANQUO 2 (BNQ2)	BANQUO 2 (BNQ2);BASIC HELIX-LOOP-HELIX PROTEIN 134 (BHLH134)	-1.30561	-0.212934	-3.08524	0.00373219	0.0284034	-1.9148
AT5G58900	AT5G58900.1	Homeodomain-like transcriptional regulator; FUNCTIONS IN: DNA binding, sequence-specific DNA binding transcription factor activity; INVOLVED IN: regulation of transcription; EXPRESSED IN: 20 plant structures; EXPRESSED DURING: 11 growth stages; CONTAINS InterPro DOMAIN/s: Molecular chaperone, heat shock protein, Hsp40, DnaJ (InterPro:IPR015609), SANT, eukarya (InterPro:IPR017884), Myb-like DNA-bi…	protein_coding			-1.30578	5.14396	-4.69066	3.31e-05	0.00101841	2.04556
AT5G13200	AT5G13200.1	GRAM domain family protein; CONTAINS InterPro DOMAIN/s: GRAM (InterPro:IPR004182); BEST Arabidopsis thaliana protein match is: GRAM domain family protein (TAIR:AT2G22475.1); Has 1807 Blast hits to 1807 proteins in 277 species: Archae - 0; Bacteria - 0; Metazoa - 736; Fungi - 347; Plants - 385; Viruses - 0; Other Eukaryotes - 339 (source: NCBI BLink).	protein_coding			-1.30614	3.35638	-3.34532	0.00182773	0.0172981	-1.50741
AT2G44080	AT2G44080.1	Encodes ARL, a gene similar to ARGOS involved in cell expansion-dependent organ growth. Upregulated by brassinosteroid. Acts downstream of BRI1.	protein_coding	ARGOS-LIKE (ARL)	ARGOS-LIKE (ARL)	-1.30691	5.38912	-3.60884	0.000865057	0.0101246	-1.05369
AT2G40435	AT2G40435.1	BEST Arabidopsis thaliana protein match is: transcription regulators (TAIR:AT3G56220.1); Has 289 Blast hits to 289 proteins in 30 species: Archae - 0; Bacteria - 0; Metazoa - 0; Fungi - 0; Plants - 289; Viruses - 0; Other Eukaryotes - 0 (source: NCBI BLink).	protein_coding			-1.30694	-0.976908	-3.55248	0.00101707	0.0113265	-0.820577
AT4G29740	AT4G29740.2	It encodes a protein whose sequence is similar to cytokinin oxidase/dehydrogenase, which catalyzes the degradation of cytokinins.	protein_coding	CYTOKININ OXIDASE 4 (CKX4)	(ATCKX4);CYTOKININ OXIDASE 4 (CKX4)	-1.3139	0.681149	-3.77551	0.000532902	0.00716347	-0.537958
AT3G16670	AT3G16670.1	Pollen Ole e 1 allergen and extensin family protein; FUNCTIONS IN: molecular_function unknown; INVOLVED IN: response to oxidative stress; LOCATED IN: endomembrane system; EXPRESSED IN: 9 plant structures; EXPRESSED DURING: 7 growth stages; CONTAINS InterPro DOMAIN/s: Pollen Ole e 1 allergen/extensin (InterPro:IPR006041); BEST Arabidopsis thaliana protein match is: Pollen Ole e 1 allergen and exte…	protein_coding			-1.31442	-0.523061	-5.04576	1.09e-05	0.000454318	3.12328
AT5G12050	AT5G12050.1	unknown protein; BEST Arabidopsis thaliana protein match is: unknown protein (TAIR:AT3G13980.1); Has 1807 Blast hits to 1807 proteins in 277 species: Archae - 0; Bacteria - 0; Metazoa - 736; Fungi - 347; Plants - 385; Viruses - 0; Other Eukaryotes - 339 (source: NCBI BLink).	protein_coding			-1.31873	3.15809	-3.95785	0.00031091	0.00485006	0.0398408
AT4G12540	AT4G12540.1	unknown protein; Has 29 Blast hits to 26 proteins in 11 species: Archae - 2; Bacteria - 0; Metazoa - 0; Fungi - 0; Plants - 27; Viruses - 0; Other Eukaryotes - 0 (source: NCBI BLink).	protein_coding			-1.3246	-0.463105	-3.30305	0.00205618	0.0188121	-1.36451
AT1G29720	AT1G29720.1	Leucine-rich repeat transmembrane protein kinase; FUNCTIONS IN: protein serine/threonine kinase activity, protein kinase activity, kinase activity, ATP binding; INVOLVED IN: protein amino acid phosphorylation; LOCATED IN: endomembrane system; EXPRESSED IN: 15 plant structures; EXPRESSED DURING: 9 growth stages; CONTAINS InterPro DOMAIN/s: Protein kinase, ATP binding site (InterPro:IPR017441), Ser…	protein_coding		CELLULOSE SYNTHASE LIKE D2 (CLSD2)	-1.32891	-0.248486	-2.8515	0.00692556	0.0441056	-2.86479
AT4G18030	AT4G18030.1	S-adenosyl-L-methionine-dependent methyltransferases superfamily protein; INVOLVED IN: biological_process unknown; LOCATED IN: Golgi apparatus, plasma membrane, plant-type cell wall; EXPRESSED IN: 24 plant structures; EXPRESSED DURING: 14 growth stages; CONTAINS InterPro DOMAIN/s: Protein of unknown function DUF248, methyltransferase putative (InterPro:IPR004159); BEST Arabidopsis thaliana protei…	protein_coding			-1.32907	7.07923	-7.83365	1.59e-09	7.11e-07	11.7363
AT3G61898	AT3G61898.1	unknown protein; FUNCTIONS IN: molecular_function unknown; INVOLVED IN: biological_process unknown; LOCATED IN: mitochondrion; Has 35333 Blast hits to 34131 proteins in 2444 species: Archae - 798; Bacteria - 22429; Metazoa - 974; Fungi - 991; Plants - 531; Viruses - 0; Other Eukaryotes - 9610 (source: NCBI BLink).	protein_coding			-1.32925	1.97678	-3.0997	0.00358948	0.0275872	-1.85467
AT5G49500	AT5G49500.1	Signal recognition particle, SRP54 subunit protein; FUNCTIONS IN: 7S RNA binding, protein binding, mRNA binding, GTP binding; INVOLVED IN: SRP-dependent cotranslational protein targeting to membrane, signal sequence recognition, SRP-dependent cotranslational protein targeting to membrane; LOCATED IN: signal recognition particle, signal recognition particle, endoplasmic reticulum targeting; EXPRES…	protein_coding			-1.32962	2.33121	-5.11912	8.61e-06	0.000379957	3.54231
AT4G01750	AT4G01750.1	Encodes a protein with UDP-xylose-dependent xylosyltransferase activity, which transfers Xyl onto L-fucose and (albeit less efficiently) L-arabinose. The linkage to L-fucose was shown to be preferentially to the <i>O</i>-4 position. Analysis of mutant containing T-DNA insertion in this gene indicate that the RGXT2 protein might be involved in the synthesis of the &alpha;-D-Xyl-(1,3)-&alpha;-L-Fuc…	protein_coding	RHAMNOGALACTURONAN XYLOSYLTRANSFERASE 2 (RGXT2)	RHAMNOGALACTURONAN XYLOSYLTRANSFERASE 2 (RGXT2)	-1.32968	2.87594	-3.32982	0.00190852	0.017864	-1.65339
AT1G06360	AT1G06360.1	Fatty acid desaturase family protein; FUNCTIONS IN: oxidoreductase activity, oxidoreductase activity, acting on paired donors, with oxidation of a pair of donors resulting in the reduction of molecular oxygen to two molecules of water; INVOLVED IN: oxidation reduction, lipid metabolic process; CONTAINS InterPro DOMAIN/s: Fatty acid desaturase, type 1, core (InterPro:IPR015876), Fatty acid desatur…	protein_coding			-1.33097	3.75944	-6.3085	1.94e-07	2.26e-05	7.05205
AT1G08890	AT1G08890.1	Major facilitator superfamily protein; FUNCTIONS IN: carbohydrate transmembrane transporter activity, sugar:hydrogen symporter activity; INVOLVED IN: transport, transmembrane transport; LOCATED IN: chloroplast, membrane; CONTAINS InterPro DOMAIN/s: Sugar transporter, conserved site (InterPro:IPR005829), Major facilitator superfamily (InterPro:IPR020846), General substrate transporter (InterPro:IP…	protein_coding			-1.33299	5.42936	-5.82915	8.97e-07	7.38e-05	5.55703
AT5G46240	AT5G46240.1	Encodes a potassium channel protein (KAT1). ABA triggers KAT1 endocytosis both in epidermal cells as well as guard cells. Upon removal of ABA, KAT1 is recycled back to the plasma membrane. KAT1 is localized within 0.5?0.6 &#956;m diameter microdomains at the plasma membrane surface. KAT1 belongs to the Shaker family K+ channel. This family includes five groups based on phylogenetic analysis (FEBS…	protein_coding	POTASSIUM CHANNEL IN ARABIDOPSIS THALIANA 1 (KAT1)	POTASSIUM CHANNEL IN ARABIDOPSIS THALIANA 1 (KAT1)	-1.33469	3.66185	-5.43601	3.15e-06	0.000179618	4.35082
AT1G22710	AT1G22710.1	Encodes for a high-affinity transporter essential for phloem loading and long-distance transport. A major sucrose transporter, AtSUC2 can also transport a wide range of physiological and synthetic glucose conjugates with both &#945;- or &#946;-linkage.	protein_coding	SUCROSE-PROTON SYMPORTER 2 (SUC2)	ARABIDOPSIS THALIANA SUCROSE-PROTON SYMPORTER 2 (ATSUC2);SUCROSE TRANSPORTER 1 (SUT1);SUCROSE-PROTON SYMPORTER 2 (SUC2)	-1.33797	7.23514	-7.0493	1.84e-08	4.16e-06	9.35248
AT5G49660	AT5G49660.1	The gene encodes receptorlike kinase (RLK). Involved in the maintenance organization of cell files or cell morphology in conductive elements.	protein_coding	XYLEM INTERMIXED WITH PHLOEM 1 (XIP1)	XYLEM INTERMIXED WITH PHLOEM 1 (XIP1)	-1.33919	5.3672	-5.19359	6.8e-06	0.000325433	3.58867
AT1G04250	AT1G04250.1	Transcription regulator acting as repressor of auxin-inducible gene expression. Auxin-inducible AUX/IAA gene. Short-lived nuclear protein with four conserved domains. Domain III has homology to beta alpha alpha dimerization and DNA binding domains. Involved in auxin signaling. Auxin induces the degradation of the protein in a dosage-dependent manner in a process mediated by AtRac1. Auxin induced …	protein_coding	AUXIN RESISTANT 3 (AXR3)	AUXIN RESISTANT 3 (AXR3);INDOLE-3-ACETIC ACID INDUCIBLE 17 (IAA17)	-1.33939	5.30696	-2.99843	0.0047083	0.0336145	-2.23791
AT2G30424	AT2G30424.1	In a tandem repeat with AT2g30432 (TCL1) and AT2g30420 (ETC2), it encodes a single-repeat R3 MYB transcription factor that is involved in the negative regulation of trichome formation.	protein_coding	TRICHOMELESS 2 (TCL2)	TRICHOMELESS 2 (TCL2)	-1.33985	1.43551	-5.59626	1.89e-06	0.000123523	4.86515
AT3G19620	AT3G19620.1	Glycosyl hydrolase family protein; FUNCTIONS IN: hydrolase activity, hydrolyzing O-glycosyl compounds; INVOLVED IN: carbohydrate metabolic process; LOCATED IN: cell wall; EXPRESSED IN: 14 plant structures; EXPRESSED DURING: LP.04 four leaves visible, 4 anthesis, LP.10 ten leaves visible, C globular stage, petal differentiation and expansion stage; CONTAINS InterPro DOMAIN/s: Glycoside hydrolase, …	protein_coding			-1.34044	1.13255	-3.56743	0.000974431	0.0110001	-0.908066
AT3G50650	AT3G50650.1	GRAS family transcription factor; CONTAINS InterPro DOMAIN/s: Transcription factor GRAS (InterPro:IPR005202); BEST Arabidopsis thaliana protein match is: GRAS family transcription factor (TAIR:AT5G66770.1); Has 2907 Blast hits to 2857 proteins in 413 species: Archae - 0; Bacteria - 24; Metazoa - 184; Fungi - 97; Plants - 2517; Viruses - 13; Other Eukaryotes - 72 (source: NCBI BLink).	protein_coding			-1.3436	4.14894	-6.19169	2.82e-07	2.99e-05	6.68951
AT3G48970	AT3G48970.1	Heavy metal transport/detoxification superfamily protein ; FUNCTIONS IN: copper ion binding, metal ion binding; INVOLVED IN: copper ion transport, metal ion transport; EXPRESSED IN: 16 plant structures; EXPRESSED DURING: 9 growth stages; CONTAINS InterPro DOMAIN/s: Heavy metal transport/detoxification protein (InterPro:IPR006121); BEST Arabidopsis thaliana protein match is: Heavy metal transport/…	protein_coding			-1.34387	2.49878	-2.92805	0.0056709	0.0384103	-2.20941
AT3G23820	AT3G23820.1	UDP-D-glucuronate 4-epimerase	protein_coding	UDP-D-GLUCURONATE 4-EPIMERASE 6 (GAE6)	UDP-D-GLUCURONATE 4-EPIMERASE 6 (GAE6)	-1.34491	7.36504	-7.52261	4.18e-09	1.54e-06	10.8007
AT2G34340	AT2G34340.1	Protein of unknown function, DUF584; CONTAINS InterPro DOMAIN/s: Protein of unknown function DUF584 (InterPro:IPR007608); BEST Arabidopsis thaliana protein match is: Protein of unknown function, DUF584 (TAIR:AT1G29640.1); Has 334 Blast hits to 334 proteins in 20 species: Archae - 0; Bacteria - 0; Metazoa - 0; Fungi - 0; Plants - 334; Viruses - 0; Other Eukaryotes - 0 (source: NCBI BLink).	protein_coding			-1.34617	0.456251	-2.85373	0.00688563	0.0439579	-2.35763
AT1G64625	AT1G64625.1	Serine/threonine-protein kinase WNK (With No Lysine)-related; BEST Arabidopsis thaliana protein match is: transcription factor-related (TAIR:AT2G27230.2); Has 35333 Blast hits to 34131 proteins in 2444 species: Archae - 798; Bacteria - 22429; Metazoa - 974; Fungi - 991; Plants - 531; Viruses - 0; Other Eukaryotes - 9610 (source: NCBI BLink).	protein_coding			-1.34711	0.0512974	-3.57036	0.000966253	0.0109341	-0.718427
AT5G41460	AT5G41460.1	Protein of unknown function (DUF604); CONTAINS InterPro DOMAIN/s: Protein of unknown function DUF604 (InterPro:IPR006740); BEST Arabidopsis thaliana protein match is: Protein of unknown function (DUF604) (TAIR:AT4G23490.1); Has 1807 Blast hits to 1807 proteins in 277 species: Archae - 0; Bacteria - 0; Metazoa - 736; Fungi - 347; Plants - 385; Viruses - 0; Other Eukaryotes - 339 (source: NCBI BLin…	protein_coding			-1.35024	1.82683	-4.03748	0.000245063	0.00407598	0.382267
AT5G10570	AT5G10570.1	basic helix-loop-helix (bHLH) DNA-binding superfamily protein; FUNCTIONS IN: DNA binding, sequence-specific DNA binding transcription factor activity; INVOLVED IN: regulation of transcription; LOCATED IN: nucleus; CONTAINS InterPro DOMAIN/s: Helix-loop-helix DNA-binding domain (InterPro:IPR001092), Helix-loop-helix DNA-binding (InterPro:IPR011598); BEST Arabidopsis thaliana protein match is: beta…	protein_coding			-1.35097	-0.434183	-2.97235	0.00504558	0.0352699	-2.13659
AT5G61340	AT5G61340.1	unknown protein; BEST Arabidopsis thaliana protein match is: unknown protein (TAIR:AT1G26650.1); Has 30201 Blast hits to 17322 proteins in 780 species: Archae - 12; Bacteria - 1396; Metazoa - 17338; Fungi - 3422; Plants - 5037; Viruses - 0; Other Eukaryotes - 2996 (source: NCBI BLink).	protein_coding			-1.35741	3.07911	-3.27734	0.00220817	0.0197214	-1.56413
AT4G05320	AT4G05320.2	One of five polyubiquitin genes in A. thaliana. These genes encode the highly conserved 76-amino acid protein ubiquitin that is covalently attached to substrate proteins targeting most for degradation. Polyubiquitin genes are characterized by the presence of tandem repeats of the 228 bp that encode a ubiquitin monomer. Induced by salicylic acid. Independent of NPR1 for their induction by salicyli…	protein_coding	POLYUBIQUITIN 10 (UBQ10)	UBIQUITIN 10 (UBI10);POLYUBIQUITIN 10 (UBQ10)	-1.35872	10.6155	-9.01889	4.42e-11	6.63e-08	15.165
AT3G53980	AT3G53980.1	Bifunctional inhibitor/lipid-transfer protein/seed storage 2S albumin superfamily protein; FUNCTIONS IN: lipid binding; INVOLVED IN: lipid transport; LOCATED IN: endomembrane system; EXPRESSED IN: 10 plant structures; EXPRESSED DURING: 7 growth stages; CONTAINS InterPro DOMAIN/s: Bifunctional inhibitor/plant lipid transfer protein/seed storage (InterPro:IPR016140), Plant lipid transfer protein/se…	protein_coding			-1.35876	2.16969	-3.13144	0.00329398	0.025904	-1.95636
AT3G14200	AT3G14200.1	Chaperone DnaJ-domain superfamily protein; FUNCTIONS IN: heat shock protein binding; INVOLVED IN: protein folding; LOCATED IN: cellular_component unknown; EXPRESSED IN: 19 plant structures; EXPRESSED DURING: 11 growth stages; CONTAINS InterPro DOMAIN/s: Molecular chaperone, heat shock protein, Hsp40, DnaJ (InterPro:IPR015609), Heat shock protein DnaJ, N-terminal (InterPro:IPR001623); BEST Arabido…	protein_coding			-1.3594	3.66203	-4.3432	9.7e-05	0.00213269	1.249
AT5G22460	AT5G22460.1	alpha/beta-Hydrolases superfamily protein; FUNCTIONS IN: catalytic activity; INVOLVED IN: biological_process unknown; LOCATED IN: cell wall, vacuole, plant-type cell wall; EXPRESSED IN: 19 plant structures; EXPRESSED DURING: 12 growth stages; CONTAINS InterPro DOMAIN/s: Alpha/beta hydrolase fold-1 (InterPro:IPR000073); BEST Arabidopsis thaliana protein match is: alpha/beta-Hydrolases superfamily …	protein_coding			-1.35957	0.384268	-3.41741	0.00149297	0.0149489	-1.19774
AT4G37450	AT4G37450.1	AGP18 is a lysine-rich arabinogalactan-protein (AGP) and part of a multi-gene family of glycoproteins with approx. 50 members. It falls into one subclass with AGP17 and AGP19, other lysine-rich AGPs. It is expressed in young leaves, shoots, roots and flowers.	protein_coding	ARABINOGALACTAN PROTEIN 18 (AGP18)	ARABINOGALACTAN PROTEIN 18 (AGP18); (ATAGP18)	-1.36159	4.80693	-3.61272	0.000855433	0.0100625	-0.98642
AT3G54030	AT3G54030.1	Protein kinase protein with tetratricopeptide repeat domain; FUNCTIONS IN: binding, protein kinase activity, kinase activity, ATP binding; INVOLVED IN: protein amino acid phosphorylation, N-terminal protein myristoylation; LOCATED IN: plasma membrane; EXPRESSED IN: 23 plant structures; EXPRESSED DURING: 13 growth stages; CONTAINS InterPro DOMAIN/s: Tetratricopeptide-like helical (InterPro:IPR0119…	protein_coding			-1.36276	4.75623	-8.02796	8.75e-10	5.08e-07	12.3156
AT2G04780	AT2G04780.1	fasciclin-like arabinogalactan-protein 7 (Fla7)	protein_coding	FASCICLIN-LIKE ARABINOOGALACTAN 7 (FLA7)	FASCICLIN-LIKE ARABINOOGALACTAN 7 (FLA7)	-1.36553	5.3861	-4.23143	0.000136428	0.00274068	0.681844
AT3G23090	AT3G23090.1	TPX2 (targeting protein for Xklp2) protein family; CONTAINS InterPro DOMAIN/s: Xklp2 targeting protein (InterPro:IPR009675); BEST Arabidopsis thaliana protein match is: WVD2-like 1 (TAIR:AT3G04630.3); Has 678 Blast hits to 638 proteins in 104 species: Archae - 2; Bacteria - 22; Metazoa - 209; Fungi - 27; Plants - 299; Viruses - 0; Other Eukaryotes - 119 (source: NCBI BLink).	protein_coding			-1.36595	3.5232	-3.14887	0.00314168	0.0249871	-1.7838
AT3G22142	AT3G22142.1	Encodes a Protease inhibitor/seed storage/LTP family protein	protein_coding			-1.36871	2.24697	-4.52611	5.52e-05	0.00146616	1.55516
AT4G16000	AT4G16000.1	unknown protein; BEST Arabidopsis thaliana protein match is: unknown protein (TAIR:AT4G15990.1); Has 30201 Blast hits to 17322 proteins in 780 species: Archae - 12; Bacteria - 1396; Metazoa - 17338; Fungi - 3422; Plants - 5037; Viruses - 0; Other Eukaryotes - 2996 (source: NCBI BLink).	protein_coding			-1.37142	3.55598	-3.52095	0.00111302	0.0121593	-1.00109
AT1G22900	AT1G22900.1	Disease resistance-responsive (dirigent-like protein) family protein; FUNCTIONS IN: molecular_function unknown; INVOLVED IN: defense response; LOCATED IN: endomembrane system; EXPRESSED IN: stamen; EXPRESSED DURING: 4 anthesis; CONTAINS InterPro DOMAIN/s: Plant disease resistance response protein (InterPro:IPR004265); BEST Arabidopsis thaliana protein match is: Disease resistance-responsive (diri…	protein_coding			-1.37737	0.801427	-4.71159	3.1e-05	0.000967894	2.35809
AT1G15670	AT1G15670.1	Galactose oxidase/kelch repeat superfamily protein; CONTAINS InterPro DOMAIN/s: Galactose oxidase/kelch, beta-propeller (InterPro:IPR011043), Kelch repeat type 1 (InterPro:IPR006652), Kelch related (InterPro:IPR013089), Kelch-type beta propeller (InterPro:IPR015915); BEST Arabidopsis thaliana protein match is: Galactose oxidase/kelch repeat superfamily protein (TAIR:AT1G80440.1); Has 1241 Blast h…	protein_coding			-1.37787	5.70146	-4.7009	3.21e-05	0.000990734	2.10818
AT2G35190	AT2G35190.1	plant-specific SNARE located in cell plate of dividing cells. cofractionates with the cytokinesis-specific syntaxin, KNOLLE, which is required for the formation of the cell plate.	protein_coding	NOVEL PLANT SNARE 11 (NPSN11)	(NSPN11);NOVEL PLANT SNARE 11 (NPSN11); (ATNPSN11)	-1.37937	3.98872	-4.4672	6.63e-05	0.00166018	1.46525
AT5G22580	AT5G22580.1	Stress responsive A/B Barrel Domain; FUNCTIONS IN: molecular_function unknown; INVOLVED IN: biological_process unknown; LOCATED IN: chloroplast; EXPRESSED IN: 22 plant structures; EXPRESSED DURING: 13 growth stages; CONTAINS InterPro DOMAIN/s: Stress responsive alpha-beta barrel (InterPro:IPR013097), Dimeric alpha-beta barrel (InterPro:IPR011008); BEST Arabidopsis thaliana protein match is: heat …	protein_coding			-1.38104	3.54505	-4.28566	0.000115655	0.00242357	0.850962
AT3G12920	AT3G12920.1	Encodes one of the BRGs (BOI-related gene) involved in resistance to Botrytis cinerea.	protein_coding	BOI-RELATED GENE 3 (BRG3)	BOI-RELATED GENE 3 (BRG3)	-1.3829	5.11903	-8.75086	9.8e-11	1.14e-07	14.4484
AT4G21215	AT4G21215.2	unknown protein; Has 35333 Blast hits to 34131 proteins in 2444 species: Archae - 798; Bacteria - 22429; Metazoa - 974; Fungi - 991; Plants - 531; Viruses - 0; Other Eukaryotes - 9610 (source: NCBI BLink).	protein_coding			-1.38718	4.62082	-7.35896	6.96e-09	2.06e-06	10.2894
AT2G38740	AT2G38740.1	Haloacid dehalogenase-like hydrolase (HAD) superfamily protein; FUNCTIONS IN: hydrolase activity, catalytic activity; INVOLVED IN: metabolic process; LOCATED IN: plasma membrane; EXPRESSED IN: 25 plant structures; EXPRESSED DURING: 15 growth stages; CONTAINS InterPro DOMAIN/s: Haloacid dehalogenase-like hydrolase (InterPro:IPR005834), Haloacid dehydrogenase/epoxide hydrolase (InterPro:IPR005833),…	protein_coding			-1.38771	3.78092	-7.4338	5.51e-09	1.81e-06	10.5325
AT5G62360	AT5G62360.1	Plant invertase/pectin methylesterase inhibitor superfamily protein; FUNCTIONS IN: enzyme inhibitor activity, pectinesterase inhibitor activity, pectinesterase activity; INVOLVED IN: biological_process unknown; LOCATED IN: cellular_component unknown; EXPRESSED IN: 22 plant structures; EXPRESSED DURING: 13 growth stages; CONTAINS InterPro DOMAIN/s: Pectinesterase inhibitor (InterPro:IPR006501); BE…	protein_coding			-1.38809	3.38251	-3.52284	0.00110702	0.0121	-1.2548
AT4G01480	AT4G01480.1	Encodes a protein that might have inorganic pyrophosphatase activity.	protein_coding	PYROPHOSPHORYLASE 5 (PPa5)	PYROPHOSPHORYLASE 5 (PPa5);PYROPHOSPHORYLASE 5 (AtPPa5)	-1.38859	3.89519	-3.7941	0.00050463	0.00686897	-0.242301
AT1G22360	AT1G22360.1	UDP-glucosyl transferase 85A2 (UGT85A2); FUNCTIONS IN: UDP-glycosyltransferase activity, transferase activity, transferring glycosyl groups, glucuronosyltransferase activity; INVOLVED IN: metabolic process; LOCATED IN: cellular_component unknown; EXPRESSED IN: 21 plant structures; EXPRESSED DURING: 11 growth stages; CONTAINS InterPro DOMAIN/s: UDP-glucuronosyl/UDP-glucosyltransferase (InterPro:IP…	protein_coding	UDP-GLUCOSYL TRANSFERASE 85A2 (UGT85A2)	UDP-GLUCOSYL TRANSFERASE 85A2 (UGT85A2);UDP-GLUCOSYL TRANSFERASE 85A2 (AtUGT85A2)	-1.3887	6.34979	-6.81634	3.85e-08	7.29e-06	8.62033
AT5G53120	AT5G53120.6	encodes a novel spermine synthase and is a paralog of previously characterized spermidine synthases, SPDS1 and SPDS2. SPDS3 forms heterodimers with SDPS2, which in turn forms heterodimers with SDPS1 in vivo. The gene does not complement speDelta3 deficiency of spermidine synthase in yeast but DOES complement speDelta4 deficiency.	protein_coding	SPERMIDINE SYNTHASE 3 (SPDS3)	SPERMIDINE SYNTHASE 3 (SPDS3)	-1.39046	4.09817	-6.7388	4.93e-08	8.86e-06	8.42914
AT3G09540	AT3G09540.1	Pectin lyase-like superfamily protein; FUNCTIONS IN: lyase activity, pectate lyase activity; INVOLVED IN: N-terminal protein myristoylation; EXPRESSED IN: 22 plant structures; EXPRESSED DURING: 12 growth stages; CONTAINS InterPro DOMAIN/s: Pectin lyase fold/virulence factor (InterPro:IPR011050), AmbAllergen (InterPro:IPR018082), Pectate lyase/Amb allergen (InterPro:IPR002022), Pectin lyase fold (…	protein_coding			-1.39224	2.86618	-5.20426	6.58e-06	0.000318196	3.76445
AT2G32340	AT2G32340.1	TraB family protein; CONTAINS InterPro DOMAIN/s: Pheromone shutdown-related, TraB (InterPro:IPR002816); BEST Arabidopsis thaliana protein match is: TraB family protein (TAIR:AT1G05270.1); Has 770 Blast hits to 747 proteins in 261 species: Archae - 151; Bacteria - 256; Metazoa - 126; Fungi - 0; Plants - 105; Viruses - 0; Other Eukaryotes - 132 (source: NCBI BLink).	protein_coding			-1.39253	2.26611	-3.62729	0.000820214	0.00977152	-0.582507
AT5G02430	AT5G02430.1	Transducin/WD40 repeat-like superfamily protein; FUNCTIONS IN: signal transducer activity; INVOLVED IN: signal transduction; LOCATED IN: heterotrimeric G-protein complex; EXPRESSED IN: 24 plant structures; EXPRESSED DURING: 12 growth stages; CONTAINS InterPro DOMAIN/s: WD40 repeat 2 (InterPro:IPR019782), WD40 repeat, conserved site (InterPro:IPR019775), WD40 repeat (InterPro:IPR001680), G-protein…	protein_coding			-1.39308	1.13587	-3.21727	0.00260597	0.0221744	-1.59435
AT3G59010	AT3G59010.1	pectin methylesterase 61 (PME61); FUNCTIONS IN: enzyme inhibitor activity, pectinesterase activity; INVOLVED IN: cell wall modification; LOCATED IN: cell wall, plant-type cell wall; EXPRESSED IN: 19 plant structures; EXPRESSED DURING: 13 growth stages; CONTAINS InterPro DOMAIN/s: Pectinesterase, active site (InterPro:IPR018040), Pectin lyase fold/virulence factor (InterPro:IPR011050), Pectinester…	protein_coding	PECTIN METHYLESTERASE 61 (PME61)	PECTIN METHYLESTERASE 61 (PME61);PECTIN METHYLESTERASE 35 (PME35)	-1.39378	3.63307	-3.75402	0.000567519	0.00749917	-0.595079
AT3G56400	AT3G56400.1	member of WRKY Transcription Factor; Group III. Function as activator of SA-dependent defense genes and a repressor of JA-regulated genes. WRKY70-controlled suppression of JA-signaling is partly executed by NPR1.	protein_coding	WRKY DNA-BINDING PROTEIN 70 (WRKY70)	ARABIDOPSIS THALIANA WRKY DNA-BINDING PROTEIN 70 (ATWRKY70);WRKY DNA-BINDING PROTEIN 70 (WRKY70)	-1.39493	3.69091	-4.60303	4.35e-05	0.00123138	1.78198
AT5G18300	AT5G18300.1	NAC domain containing protein 88 (NAC088); FUNCTIONS IN: sequence-specific DNA binding transcription factor activity; INVOLVED IN: multicellular organismal development, regulation of transcription; LOCATED IN: cellular_component unknown; CONTAINS InterPro DOMAIN/s: No apical meristem (NAM) protein (InterPro:IPR003441); BEST Arabidopsis thaliana protein match is: NAC (No Apical Meristem) domain tr…	protein_coding	NAC DOMAIN CONTAINING PROTEIN 88 (NAC088)	NAC DOMAIN CONTAINING PROTEIN 88 (anac088);NAC DOMAIN CONTAINING PROTEIN 88 (NAC088)	-1.39778	-0.110572	-3.6557	0.000755533	0.00918583	-0.506418
AT4G23550	AT4G23550.1	Encodes WRKY DNA-binding protein 29 (WRKY29).	protein_coding	(WRKY29)	(WRKY29); (ATWRKY29)	-1.40425	1.9438	-6.05568	4.35e-07	4.21e-05	6.34137
AT2G41290	AT2G41290.1	Although this enzyme is predicted to encode a strictosidine synthase (SS), it lacks a conserved catalytic glutamate residue found in active SS enzymes and it is not expected to have SS activity.	protein_coding	STRICTOSIDINE SYNTHASE-LIKE 2 (SSL2)	STRICTOSIDINE SYNTHASE-LIKE 2 (SSL2)	-1.40455	0.31985	-3.81139	0.000479625	0.00660248	-0.112072
AT1G28610	AT1G28610.2	GDSL-like Lipase/Acylhydrolase superfamily protein; FUNCTIONS IN: lipase activity, hydrolase activity, acting on ester bonds, carboxylesterase activity; INVOLVED IN: lipid metabolic process; LOCATED IN: endomembrane system; EXPRESSED IN: 22 plant structures; EXPRESSED DURING: 13 growth stages; CONTAINS InterPro DOMAIN/s: Lipase, GDSL (InterPro:IPR001087); BEST Arabidopsis thaliana protein match i…	protein_coding			-1.40607	0.702694	-5.13695	8.14e-06	0.000369327	3.55139
AT1G72360	AT1G72360.2	Encodes a member of the ERF (ethylene response factor) subfamily B-2 of ERF/AP2 transcription factor family. The protein contains one AP2 domain. There are 5 members in this subfamily including RAP2.2 AND RAP2.12.	protein_coding	ETHYLENE RESPONSE FACTOR 73 (ERF73)	(AtERF73);ETHYLENE RESPONSE FACTOR 73 (ERF73);HYPOXIA RESPONSIVE ERF (ETHYLENE RESPONSE FACTOR) 1 (HRE1)	-1.40682	2.7482	-5.26389	5.44e-06	0.000276239	3.94066
AT5G45820	AT5G45820.1	Encodes a CBL-interacting serine/threonine protein kinase comprised of an N-terminal kinase catalytic domain similar to SNF1/AMPK and a unique C-terminal regulatory domain.	protein_coding	CBL-INTERACTING PROTEIN KINASE 20 (CIPK20)	PROTEIN KINASE 18 (PKS18);CBL-INTERACTING PROTEIN KINASE 20 (CIPK20);SNF1-RELATED PROTEIN KINASE 3.6 (SnRK3.6)	-1.40743	-0.0188102	-4.12016	0.00019111	0.00346523	0.556141
AT5G60490	AT5G60490.1	Encodes a member of fasciclin-like arabinogalactan proteins (FLAs) containing a cell adhesion fasciclin (FAS) domain. Mutations result in altered stem biomechanics with reduced tensile strength and reduced tensile modulus of elasticity, as well as altered cell wall architecture and composition, with increased cellulose microfibril angle, reduced arabinose, galactose and cellulose content.	protein_coding	FASCICLIN-LIKE ARABINOGALACTAN-PROTEIN 12 (FLA12)	FASCICLIN-LIKE ARABINOGALACTAN-PROTEIN 12 (FLA12)	-1.40869	2.13671	-4.0419	0.000241834	0.00403961	0.478998
AT1G07090	AT1G07090.1	LIGHT SENSITIVE HYPOCOTYLS 6 (LSH6); CONTAINS InterPro DOMAIN/s: Protein of unknown function DUF640 (InterPro:IPR006936); BEST Arabidopsis thaliana protein match is: Protein of unknown function (DUF640) (TAIR:AT5G58500.1); Has 311 Blast hits to 311 proteins in 18 species: Archae - 0; Bacteria - 0; Metazoa - 14; Fungi - 0; Plants - 297; Viruses - 0; Other Eukaryotes - 0 (source: NCBI BLink).	protein_coding	LIGHT SENSITIVE HYPOCOTYLS 6 (LSH6)	LIGHT SENSITIVE HYPOCOTYLS 6 (LSH6)	-1.4113	3.36758	-3.01413	0.00451567	0.0326275	-2.18446
AT1G77920	AT1G77920.1	bZIP transcription factor family protein; CONTAINS InterPro DOMAIN/s: Basic-leucine zipper (bZIP) transcription factor (InterPro:IPR004827), bZIP transcription factor, bZIP-1 (InterPro:IPR011616); BEST Arabidopsis thaliana protein match is: TGA1A-related gene 3 (TAIR:AT1G22070.1); Has 1009 Blast hits to 1009 proteins in 97 species: Archae - 0; Bacteria - 11; Metazoa - 10; Fungi - 28; Plants - 845…	protein_coding			-1.41159	3.9091	-3.32329	0.00194357	0.0180748	-1.45197
AT3G51180	AT3G51180.1	Zinc finger C-x8-C-x5-C-x3-H type family protein; FUNCTIONS IN: zinc ion binding, nucleic acid binding; INVOLVED IN: biological_process unknown; EXPRESSED IN: 24 plant structures; EXPRESSED DURING: 15 growth stages; CONTAINS InterPro DOMAIN/s: Zinc finger, CCCH-type (InterPro:IPR000571); BEST Arabidopsis thaliana protein match is: Zinc finger C-x8-C-x5-C-x3-H type family protein (TAIR:AT5G66270.1…	protein_coding			-1.41216	2.08791	-3.45504	0.00134238	0.0138832	-1.00913
AT2G46310	AT2G46310.1	CRF5 encodes one of the six cytokinin response factors. It is transcriptionally upregulated in response to cytokinin. CRF5 belongs to the AP2/ERF superfamily of the transcriptional factors. CRF proteins rapidly relocalize to the nucleus in response to cytokinin. Analysis of loos-of-function mutants revealed that the CRFs function redundantly to regulate the development of embryos, cotyledons and …	protein_coding	CYTOKININ RESPONSE FACTOR 5 (CRF5)	CYTOKININ RESPONSE FACTOR 5 (CRF5)	-1.41375	3.40323	-7.86056	1.46e-09	6.95e-07	11.8199
AT2G47750	AT2G47750.1	Encodes GH3.9, a member of the GH3 family auxin-responsive genes. gh3.9-1 mutants had greater primary root length, increased sensitivity to indole-3-acetic acid (IAA)-mediated root growth inhibition, but no obvious effects on apical dominance or leaf morphology.	protein_coding	PUTATIVE INDOLE-3-ACETIC ACID-AMIDO SYNTHETASE GH3.9 (GH3.9)	PUTATIVE INDOLE-3-ACETIC ACID-AMIDO SYNTHETASE GH3.9 (GH3.9)	-1.41426	-0.335202	-3.27019	0.00225227	0.0200046	-1.58716
AT5G23870	AT5G23870.3	Pectinacetylesterase family protein; FUNCTIONS IN: carboxylesterase activity; INVOLVED IN: biological_process unknown; LOCATED IN: plant-type cell wall; EXPRESSED IN: 22 plant structures; EXPRESSED DURING: 13 growth stages; CONTAINS InterPro DOMAIN/s: Pectinacetylesterase (InterPro:IPR004963); BEST Arabidopsis thaliana protein match is: Pectinacetylesterase family protein (TAIR:AT3G62060.1); Has …	protein_coding			-1.41862	4.57344	-7.1465	1.36e-08	3.52e-06	9.64928
AT2G35945	AT2G35945.1	Potential natural antisense gene, locus overlaps with AT2G35940	other_rna			-1.42129	1.95189	-3.25369	0.00235735	0.0207057	-1.6035
AT3G03470	AT3G03470.1	member of CYP89A	protein_coding	"CYTOCHROME P450, FAMILY 87, SUBFAMILY A, POLYPEPTIDE 9" (CYP89A9)	"CYTOCHROME P450, FAMILY 87, SUBFAMILY A, POLYPEPTIDE 9" (CYP89A9)	-1.42342	5.10505	-4.03733	0.000245176	0.00407598	0.21964
AT3G63200	AT3G63200.1	PATATIN-like protein 9 (PLP9); FUNCTIONS IN: nutrient reservoir activity; INVOLVED IN: metabolic process, lipid metabolic process; LOCATED IN: cellular_component unknown; EXPRESSED IN: 18 plant structures; EXPRESSED DURING: 13 growth stages; CONTAINS InterPro DOMAIN/s: Acyl transferase/acyl hydrolase/lysophospholipase (InterPro:IPR016035), Patatin (InterPro:IPR002641); BEST Arabidopsis thaliana p…	protein_coding	PATATIN-LIKE PROTEIN 9 (PLP9)	PATATIN-LIKE PROTEIN 9 (PLP9); (PLA IIIB)	-1.42398	4.2236	-5.99852	5.22e-07	4.89e-05	6.10708
AT3G43600	AT3G43600.1	Encodes an aldehyde oxidase. AAO2 does not appear to act on abscisic aldehyde in vitro but it is possible that it may function in abscisic acid biosynthesis when the activity of At2g27150 (AAO3), the primary abscisic aldehyde oxidase, is lost.	protein_coding	ALDEHYDE OXIDASE 2 (AAO2)	ARABIDOPSIS THALIANA ALDEHYDE OXIDASE 3 (AtAO3);ALDEHYDE OXIDASE GAMMA (AOgamma);ALDEHYDE OXIDASE 2 (AAO2);ALDEHYDE OXIDASE 3 (AO3);ARABIDOPSIS THALIANA ALDEHYDE OXIDASE 2 (atAO-2)	-1.42678	4.86767	-5.26802	5.37e-06	0.000275476	3.94159
AT1G49200	AT1G49200.1	RING/U-box superfamily protein; FUNCTIONS IN: zinc ion binding; EXPRESSED IN: 18 plant structures; EXPRESSED DURING: 10 growth stages; CONTAINS InterPro DOMAIN/s: Zinc finger, RING-type (InterPro:IPR001841), Zinc finger, C3HC4 RING-type (InterPro:IPR018957); BEST Arabidopsis thaliana protein match is: RING/U-box superfamily protein (TAIR:AT1G49220.1); Has 8744 Blast hits to 8720 proteins in 274 s…	protein_coding			-1.42762	1.84284	-4.05207	0.000234566	0.00395279	0.500069
AT3G16800	AT3G16800.2	Protein phosphatase 2C family protein; FUNCTIONS IN: protein serine/threonine phosphatase activity, catalytic activity; INVOLVED IN: biological_process unknown; LOCATED IN: nucleus, cytoplasm; EXPRESSED IN: 12 plant structures; EXPRESSED DURING: 6 growth stages; CONTAINS InterPro DOMAIN/s: Protein phosphatase 2C-related (InterPro:IPR001932), Protein phosphatase 2C (InterPro:IPR015655), Protein ph…	protein_coding			-1.42784	3.41597	-3.77062	0.000540594	0.00723907	-0.27784
AT5G26330	AT5G26330.1	Cupredoxin superfamily protein; FUNCTIONS IN: electron carrier activity, copper ion binding; LOCATED IN: anchored to membrane; EXPRESSED IN: 16 plant structures; EXPRESSED DURING: 10 growth stages; CONTAINS InterPro DOMAIN/s: Plastocyanin-like (InterPro:IPR003245), Cupredoxin (InterPro:IPR008972); BEST Arabidopsis thaliana protein match is: Cupredoxin superfamily protein (TAIR:AT2G31050.1); Has 1…	protein_coding			-1.43008	1.35186	-3.56867	0.000970965	0.0109727	-0.733166
AT4G31000	AT4G31000.1	Calmodulin-binding protein; CONTAINS InterPro DOMAIN/s: Calmodulin binding protein-like (InterPro:IPR012416); BEST Arabidopsis thaliana protein match is: Calmodulin-binding protein (TAIR:AT2G24300.2); Has 354 Blast hits to 312 proteins in 18 species: Archae - 0; Bacteria - 0; Metazoa - 3; Fungi - 0; Plants - 351; Viruses - 0; Other Eukaryotes - 0 (source: NCBI BLink).	protein_coding			-1.43647	4.52195	-4.90094	1.71e-05	0.000625037	2.70149
AT5G62350	AT5G62350.1	Plant invertase/pectin methylesterase inhibitor superfamily protein; FUNCTIONS IN: enzyme inhibitor activity, pectinesterase inhibitor activity, pectinesterase activity; INVOLVED IN: response to salt stress; LOCATED IN: endomembrane system; EXPRESSED IN: 22 plant structures; EXPRESSED DURING: 13 growth stages; CONTAINS InterPro DOMAIN/s: Pectinesterase inhibitor (InterPro:IPR006501); BEST Arabido…	protein_coding			-1.43715	7.36364	-6.45811	1.2e-07	1.63e-05	7.54031
AT2G40100	AT2G40100.1	Lhcb4:3 protein (Lhcb4.3, light harvesting complex of photosystem II	protein_coding	LIGHT HARVESTING COMPLEX PHOTOSYSTEM II (LHCB4.3)	LIGHT HARVESTING COMPLEX PHOTOSYSTEM II (LHCB4.3)	-1.43729	3.00529	-4.10144	0.000202203	0.00360106	0.392447
AT1G25510	AT1G25510.1	Eukaryotic aspartyl protease family protein; FUNCTIONS IN: aspartic-type endopeptidase activity; INVOLVED IN: proteolysis; LOCATED IN: endomembrane system; EXPRESSED IN: 13 plant structures; EXPRESSED DURING: 6 growth stages; CONTAINS InterPro DOMAIN/s: Peptidase aspartic (InterPro:IPR021109), Peptidase aspartic, catalytic (InterPro:IPR009007), Peptidase A1 (InterPro:IPR001461); BEST Arabidopsis …	protein_coding			-1.44235	1.08274	-4.11166	0.000196069	0.00352471	0.603883
AT1G29660	AT1G29660.1	GDSL-like Lipase/Acylhydrolase superfamily protein; FUNCTIONS IN: hydrolase activity, acting on ester bonds, carboxylesterase activity; INVOLVED IN: lipid metabolic process; LOCATED IN: apoplast, nucleus; EXPRESSED IN: 19 plant structures; EXPRESSED DURING: 10 growth stages; CONTAINS InterPro DOMAIN/s: Lipase, GDSL (InterPro:IPR001087); BEST Arabidopsis thaliana protein match is: GDSL-like Lipase…	protein_coding			-1.44539	4.99278	-3.74896	0.000575974	0.00758703	-0.691804
AT1G33260	AT1G33260.1	Protein kinase superfamily protein; FUNCTIONS IN: kinase activity; INVOLVED IN: protein amino acid phosphorylation; LOCATED IN: cellular_component unknown; EXPRESSED IN: 16 plant structures; EXPRESSED DURING: 7 growth stages; CONTAINS InterPro DOMAIN/s: Protein kinase, ATP binding site (InterPro:IPR017441), Protein kinase, catalytic domain (InterPro:IPR000719), Serine/threonine-protein kinase-lik…	protein_coding			-1.44621	1.38053	-3.20644	0.00268456	0.0225817	-1.62977
AT4G17260	AT4G17260.1	Lactate/malate dehydrogenase family protein; FUNCTIONS IN: in 6 functions; INVOLVED IN: response to salt stress, response to abscisic acid stimulus; LOCATED IN: plasma membrane; EXPRESSED IN: 24 plant structures; EXPRESSED DURING: 13 growth stages; CONTAINS InterPro DOMAIN/s: L-lactate dehydrogenase (InterPro:IPR011304), Lactate/malate dehydrogenase, C-terminal (InterPro:IPR022383), NAD(P)-bindin…	protein_coding			-1.44624	3.95699	-6.33812	1.76e-07	2.15e-05	7.18998
AT5G03120	AT5G03120.1	unknown protein; FUNCTIONS IN: molecular_function unknown; INVOLVED IN: biological_process unknown; LOCATED IN: endomembrane system; EXPRESSED IN: 21 plant structures; EXPRESSED DURING: 13 growth stages; Has 14 Blast hits to 14 proteins in 4 species: Archae - 0; Bacteria - 0; Metazoa - 0; Fungi - 0; Plants - 14; Viruses - 0; Other Eukaryotes - 0 (source: NCBI BLink).	protein_coding			-1.44803	3.51417	-4.12812	0.000186573	0.0034154	0.466347
AT1G62800	AT1G62800.2	Encodes aspartate aminotransferase (Asp4).	protein_coding	ASPARTATE AMINOTRANSFERASE 4 (ASP4)	ASPARTATE AMINOTRANSFERASE 4 (ASP4)	-1.4487	2.94199	-3.03015	0.00432664	0.031533	-1.98597
AT2G27360	AT2G27360.1	GDSL-like Lipase/Acylhydrolase superfamily protein; FUNCTIONS IN: hydrolase activity, acting on ester bonds, carboxylesterase activity; INVOLVED IN: glycerol biosynthetic process, lipid metabolic process; LOCATED IN: endomembrane system; EXPRESSED IN: 20 plant structures; EXPRESSED DURING: 13 growth stages; CONTAINS InterPro DOMAIN/s: Lipase, GDSL (InterPro:IPR001087); BEST Arabidopsis thaliana p…	protein_coding			-1.45467	3.59262	-5.89372	7.3e-07	6.36e-05	5.85963
AT1G75960	AT1G75960.1	AMP-dependent synthetase and ligase family protein; FUNCTIONS IN: catalytic activity; INVOLVED IN: metabolic process; EXPRESSED IN: 18 plant structures; EXPRESSED DURING: 10 growth stages; CONTAINS InterPro DOMAIN/s: AMP-binding, conserved site (InterPro:IPR020845), AMP-dependent synthetase/ligase (InterPro:IPR000873); BEST Arabidopsis thaliana protein match is: acyl activating enzyme 5 (TAIR:AT5…	protein_coding			-1.45479	2.20362	-5.03292	1.13e-05	0.000462104	3.08444
AT1G68800	AT1G68800.1	Encodes a TCP transcription factor, closely related to teosinte branched1, arrests axillary bud development and prevents axillary bud outgrowth. Transcription level and mutant phenotype are weaker than its homolog BRC1 (At3G18550).	protein_coding	TCP DOMAIN PROTEIN 12 (TCP12)	TCP DOMAIN PROTEIN 12 (TCP12);BRANCHED 2 (BRC2)	-1.45673	-0.855955	-3.8993	0.000369993	0.00553723	0.120325
AT5G53750	AT5G53750.1	CBS domain-containing protein; CONTAINS InterPro DOMAIN/s: Cystathionine beta-synthase, core (InterPro:IPR000644); BEST Arabidopsis thaliana protein match is: Cystathionine beta-synthase (CBS) family protein (TAIR:AT4G27460.1); Has 152 Blast hits to 152 proteins in 18 species: Archae - 0; Bacteria - 0; Metazoa - 1; Fungi - 0; Plants - 150; Viruses - 0; Other Eukaryotes - 1 (source: NCBI BLink).	protein_coding			-1.45855	2.67599	-2.94802	0.00538059	0.0369808	-2.3281
AT3G52940	AT3G52940.1	Encodes a sterol C-14 reductase required for cell division and expansion and is involved in proper organization of the embryo.	protein_coding	FACKEL (FK)	EXTRA-LONG-LIFESPAN 1 (ELL1);FACKEL (FK); (HYD2)	-1.45954	4.40454	-5.82831	9e-07	7.38e-05	5.55565
AT3G16660	AT3G16660.1	Pollen Ole e 1 allergen and extensin family protein; FUNCTIONS IN: molecular_function unknown; INVOLVED IN: biological_process unknown; LOCATED IN: endomembrane system; CONTAINS InterPro DOMAIN/s: Pollen Ole e 1 allergen/extensin (InterPro:IPR006041); BEST Arabidopsis thaliana protein match is: Pollen Ole e 1 allergen and extensin family protein (TAIR:AT3G16670.1); Has 273 Blast hits to 210 prote…	protein_coding			-1.46288	2.19873	-4.1948	0.000152482	0.00295902	0.642291
AT3G01550	AT3G01550.1	phosphoenolpyruvate (pep)/phosphate translocator 2 (PPT2); FUNCTIONS IN: antiporter activity; INVOLVED IN: transport; LOCATED IN: integral to membrane, chloroplast, membrane; EXPRESSED IN: 19 plant structures; EXPRESSED DURING: 13 growth stages; CONTAINS InterPro DOMAIN/s: Protein of unknown function DUF6, transmembrane (InterPro:IPR000620), Tpt phosphate/phosphoenolpyruvate translocator (InterPr…	protein_coding	PHOSPHOENOLPYRUVATE (PEP)/PHOSPHATE TRANSLOCATOR 2 (PPT2)	PHOSPHOENOLPYRUVATE (PEP)/PHOSPHATE TRANSLOCATOR 2 (ATPPT2);PHOSPHOENOLPYRUVATE (PEP)/PHOSPHATE TRANSLOCATOR 2 (PPT2)	-1.46521	0.427525	-5.22127	6.23e-06	0.00030642	3.69729
AT5G12110	AT5G12110.1	Glutathione S-transferase, C-terminal-like;Translation elongation factor EF1B/ribosomal protein S6; FUNCTIONS IN: translation elongation factor activity; INVOLVED IN: translational elongation; LOCATED IN: eukaryotic translation elongation factor 1 complex; EXPRESSED IN: 18 plant structures; EXPRESSED DURING: 12 growth stages; CONTAINS InterPro DOMAIN/s: Translation elongation factor EF1B/ribosoma…	protein_coding			-1.46716	2.51491	-4.20526	0.000147719	0.00288196	0.872276
AT5G60840	AT5G60840.1	unknown protein; Has 361 Blast hits to 333 proteins in 92 species: Archae - 2; Bacteria - 55; Metazoa - 145; Fungi - 36; Plants - 42; Viruses - 19; Other Eukaryotes - 62 (source: NCBI BLink).	protein_coding			-1.46998	2.71702	-4.98841	1.3e-05	0.000511863	3.13537
AT1G12090	AT1G12090.1	extensin-like protein (ELP)	protein_coding	EXTENSIN-LIKE PROTEIN (ELP)	EXTENSIN-LIKE PROTEIN (ELP)	-1.47051	9.23968	-4.49875	6.01e-05	0.00154106	1.58328
AT2G32160	AT2G32160.3	S-adenosyl-L-methionine-dependent methyltransferases superfamily protein; FUNCTIONS IN: molecular_function unknown; INVOLVED IN: biological_process unknown; LOCATED IN: cellular_component unknown; EXPRESSED IN: 19 plant structures; EXPRESSED DURING: 13 growth stages; CONTAINS InterPro DOMAIN/s: N2227-like (InterPro:IPR012901); BEST Arabidopsis thaliana protein match is: S-adenosyl-L-methionine-de…	protein_coding			-1.47171	1.29765	-4.22274	0.00014008	0.00276955	0.786429
AT1G75430	AT1G75430.1	BEL1-like homeodomain 11 (BLH11); FUNCTIONS IN: sequence-specific DNA binding transcription factor activity; INVOLVED IN: regulation of transcription, DNA-dependent, regulation of transcription; EXPRESSED IN: ovule, pedicel; EXPRESSED DURING: 4 anthesis; CONTAINS InterPro DOMAIN/s: Homeobox (InterPro:IPR001356), Homeodomain-like (InterPro:IPR009057), POX (InterPro:IPR006563), Homeodomain-related …	protein_coding	BEL1-LIKE HOMEODOMAIN 11 (BLH11)	BEL1-LIKE HOMEODOMAIN 11 (BLH11)	-1.47257	-1.32816	-2.94577	0.00541253	0.037091	-2.18897
AT3G05880	AT3G05880.1	Induced by low temperatures, dehydration and salt stress and ABA. Encodes a small (54 amino acids), highly hydrophobic protein that bears two potential transmembrane domains.	protein_coding	RARE-COLD-INDUCIBLE 2A (RCI2A)	RARE-COLD-INDUCIBLE 2A (RCI2A)	-1.4727	8.43083	-6.05118	4.41e-07	4.25e-05	6.29121
AT1G76680	AT1G76680.2	Encodes a member of an alpha/beta barrel fold family of FMN-containing oxidoreductases. One of the closely related 12-oxophytodienoic acid reductases. This enzyme is not expected to participate in jasmonic acid biosynthesis because during in vitro assays, it shows very little activity with the naturally occurring OPDA isomer. Shows activity towards 2,4,6-trinitrotoluene. Expressed predominately i…	protein_coding	12-OXOPHYTODIENOATE REDUCTASE 1 (OPR1)	12-OXOPHYTODIENOATE REDUCTASE 1 (OPR1)	-1.4735	6.88542	-4.44142	7.17e-05	0.00175258	1.31935
AT5G58700	AT5G58700.1	phosphatidylinositol-speciwc phospholipase C4 (PLC4); FUNCTIONS IN: phospholipase C activity, phosphoinositide phospholipase C activity, phosphoric diester hydrolase activity; INVOLVED IN: signal transduction, intracellular signaling pathway, lipid metabolic process; LOCATED IN: plasma membrane; EXPRESSED IN: 22 plant structures; EXPRESSED DURING: 15 growth stages; CONTAINS InterPro DOMAIN/s: Pho…	protein_coding	PHOSPHATIDYLINOSITOL-SPECIWC PHOSPHOLIPASE C4 (PLC4)	PHOSPHATIDYLINOSITOL-SPECIWC PHOSPHOLIPASE C4 (PLC4); (ATPLC4)	-1.47356	3.32252	-5.57174	2.04e-06	0.000129155	4.88543
AT1G55330	AT1G55330.1	Encodes a putative arabinogalactan-protein (AGP21).	protein_coding	ARABINOGALACTAN PROTEIN 21 (AGP21)	ARABINOGALACTAN PROTEIN 21 (AGP21);ARABINOGALACTAN PROTEIN 21 (AtAGP21)	-1.47842	6.48422	-4.07284	0.000220382	0.00380735	0.223892
AT1G11545	AT1G11545.1	xyloglucan endotransglucosylase/hydrolase 8 (XTH8); FUNCTIONS IN: hydrolase activity, acting on glycosyl bonds, xyloglucan:xyloglucosyl transferase activity, hydrolase activity, hydrolyzing O-glycosyl compounds; INVOLVED IN: carbohydrate metabolic process, cellular glucan metabolic process; LOCATED IN: endomembrane system, cell wall, apoplast; EXPRESSED IN: 21 plant structures; EXPRESSED DURING: …	protein_coding	XYLOGLUCAN ENDOTRANSGLUCOSYLASE/HYDROLASE 8 (XTH8)	XYLOGLUCAN ENDOTRANSGLUCOSYLASE/HYDROLASE 8 (XTH8)	-1.4793	5.22776	-4.54493	5.21e-05	0.00140813	1.64694
AT2G26150	AT2G26150.1	member of Heat Stress Transcription Factor (Hsf) family. Involved in response to misfolded protein accumulation in the cytosol. Regulated by alternative splicing and non-sense-mediated decay.	protein_coding	HEAT SHOCK TRANSCRIPTION FACTOR A2 (HSFA2)	HEAT SHOCK TRANSCRIPTION FACTOR A2 (HSFA2);HEAT SHOCK TRANSCRIPTION FACTOR A2 (ATHSFA2)	-1.47956	0.990929	-2.8811	0.00641252	0.0418701	-2.33926
AT2G32990	AT2G32990.1	glycosyl hydrolase 9B8 (GH9B8); FUNCTIONS IN: hydrolase activity, hydrolyzing O-glycosyl compounds, catalytic activity; INVOLVED IN: carbohydrate metabolic process; LOCATED IN: endomembrane system; EXPRESSED IN: 17 plant structures; EXPRESSED DURING: 11 growth stages; CONTAINS InterPro DOMAIN/s: Six-hairpin glycosidase (InterPro:IPR012341), Glycoside hydrolase, family 9, active site (InterPro:IPR…	protein_coding	GLYCOSYL HYDROLASE 9B8 (GH9B8)	GLYCOSYL HYDROLASE 9B8 (AtGH9B8);GLYCOSYL HYDROLASE 9B8 (GH9B8)	-1.47962	2.90114	-2.93187	0.00561427	0.038224	-2.36501
AT1G17700	AT1G17700.1	prenylated RAB acceptor 1.F1 (PRA1.F1); CONTAINS InterPro DOMAIN/s: Prenylated rab acceptor PRA1 (InterPro:IPR004895); BEST Arabidopsis thaliana protein match is: PRA1 (Prenylated rab acceptor) family protein (TAIR:AT1G55190.1); Has 501 Blast hits to 501 proteins in 103 species: Archae - 0; Bacteria - 0; Metazoa - 111; Fungi - 27; Plants - 322; Viruses - 0; Other Eukaryotes - 41 (source: NCBI BLi…	protein_coding	PRENYLATED RAB ACCEPTOR 1.F1 (PRA1.F1)	PRENYLATED RAB ACCEPTOR 1.F1 (PRA1.F1)	-1.48093	0.458744	-3.22319	0.00256394	0.0219198	-1.54987
AT5G28020	AT5G28020.1	Encodes cysteine synthase CysD2.	protein_coding	CYSTEINE SYNTHASE D2 (CYSD2)	CYSTEINE SYNTHASE D2 (CYSD2);CYSTEINE SYNTHASE D2 (ATCYSD2)	-1.48407	4.88262	-6.99757	2.17e-08	4.7e-06	9.20445
AT5G07030	AT5G07030.1	Eukaryotic aspartyl protease family protein; FUNCTIONS IN: aspartic-type endopeptidase activity; INVOLVED IN: proteolysis; LOCATED IN: cell wall, plant-type cell wall; EXPRESSED IN: 23 plant structures; EXPRESSED DURING: 13 growth stages; CONTAINS InterPro DOMAIN/s: Peptidase aspartic, catalytic (InterPro:IPR009007), Peptidase aspartic (InterPro:IPR021109), Peptidase A1 (InterPro:IPR001461); BEST…	protein_coding			-1.48763	5.91159	-4.38886	8.43e-05	0.0019393	1.15038
AT2G43200	AT2G43200.1	S-adenosyl-L-methionine-dependent methyltransferases superfamily protein; CONTAINS InterPro DOMAIN/s: Protein of unknown function DUF248, methyltransferase putative (InterPro:IPR004159); BEST Arabidopsis thaliana protein match is: S-adenosyl-L-methionine-dependent methyltransferases superfamily protein (TAIR:AT4G00750.1); Has 1253 Blast hits to 1210 proteins in 135 species: Archae - 14; Bacteria …	protein_coding			-1.4905	2.49677	-4.19123	0.00015414	0.00298019	0.887462
AT1G30280	AT1G30280.1	Chaperone DnaJ-domain superfamily protein; FUNCTIONS IN: heat shock protein binding; LOCATED IN: cellular_component unknown; CONTAINS InterPro DOMAIN/s: Heat shock protein DnaJ, N-terminal (InterPro:IPR001623); BEST Arabidopsis thaliana protein match is: J-domain protein required for chloroplast accumulation response 1 (TAIR:AT1G75100.1); Has 2071 Blast hits to 1585 proteins in 232 species: Archa…	protein_coding			-1.49228	4.08587	-5.2433	5.81e-06	0.000292583	3.75514
AT3G12700	AT3G12700.1	Eukaryotic aspartyl protease family protein; FUNCTIONS IN: aspartic-type endopeptidase activity; INVOLVED IN: proteolysis; LOCATED IN: cellular_component unknown; EXPRESSED IN: 21 plant structures; EXPRESSED DURING: 13 growth stages; CONTAINS InterPro DOMAIN/s: Peptidase aspartic (InterPro:IPR021109), Peptidase aspartic, catalytic (InterPro:IPR009007), Peptidase A1 (InterPro:IPR001461), Peptidase…	protein_coding			-1.49246	3.69234	-4.7709	2.58e-05	0.000848616	2.36109
AT1G10370	AT1G10370.1	Encodes GSTU17 (Glutathione S-Transferase U17). Functions as a negative component of stress-mediated signal transduction pathways in drought and salt stress responses.	protein_coding	EARLY-RESPONSIVE TO DEHYDRATION 9 (ERD9)	GLUTATHIONE S-TRANSFERASE U17 (GSTU17);EARLY-RESPONSIVE TO DEHYDRATION 9 (ERD9);GLUTATHIONE S-TRANSFERASE 30 (GST30);GLUTATHIONE S-TRANSFERASE TAU 17 (ATGSTU17);GLUTATHIONE S-TRANSFERASE 30B (GST30B)	-1.49382	2.7157	-3.57027	0.000966505	0.0109341	-0.855206
AT2G29120	AT2G29120.1	member of Putative ligand-gated ion channel subunit family	protein_coding	GLUTAMATE RECEPTOR 2.7 (GLR2.7)	GLUTAMATE RECEPTOR 2.7 (GLR2.7);GLUTAMATE RECEPTOR 2.7 (ATGLR2.7);GLUTAMATE RECEPTOR 2.7 (GLR2.7)	-1.49581	-0.100998	-3.47109	0.00128266	0.013466	-0.974337
AT2G21880	AT2G21880.1	RAB GTPase homolog 7A (RAB7A); FUNCTIONS IN: GTP binding; INVOLVED IN: protein transport, small GTPase mediated signal transduction; EXPRESSED IN: 24 plant structures; EXPRESSED DURING: 14 growth stages; CONTAINS InterPro DOMAIN/s: Ras GTPase (InterPro:IPR001806), Small GTP-binding protein (InterPro:IPR005225), Small GTPase (InterPro:IPR020851), Ras (InterPro:IPR013753), Ras small GTPase, Rab typ…	protein_coding	RAB GTPASE HOMOLOG 7A (RAB7A)	RAB GTPASE HOMOLOG 7A (RAB7A);RAB GTPASE HOMOLOG 7A (ATRAB7A);ARABIDOPSIS RAB GTPASE HOMOLOG G2 (ATRABG2)	-1.49625	2.93151	-3.90971	0.000358743	0.00541728	0.134076
AT4G13260	AT4G13260.1	Encodes YUC2. Catalyzes conversion of IPA (indole-3-pyruvic acid) to IAA (indole-3-acetic acid) in auxin biosynthesis pathway.	protein_coding	YUCCA2 (YUC2)	YUCCA2 (YUC2); (ATYUC2)	-1.49775	0.476533	-3.55504	0.00100965	0.0112644	-0.770812
AT2G25510	AT2G25510.1	unknown protein; Has 2 Blast hits to 2 proteins in 1 species: Archae - 0; Bacteria - 0; Metazoa - 0; Fungi - 0; Plants - 2; Viruses - 0; Other Eukaryotes - 0 (source: NCBI BLink).	protein_coding			-1.4983	1.87407	-4.45608	6.86e-05	0.00169585	1.39273
AT1G32860	AT1G32860.1	Glycosyl hydrolase superfamily protein; FUNCTIONS IN: cation binding, hydrolase activity, hydrolyzing O-glycosyl compounds, catalytic activity; INVOLVED IN: carbohydrate metabolic process; LOCATED IN: anchored to plasma membrane, plasma membrane, anchored to membrane; EXPRESSED IN: 18 plant structures; EXPRESSED DURING: 12 growth stages; CONTAINS InterPro DOMAIN/s: Glycoside hydrolase, catalytic …	protein_coding			-1.49905	2.89125	-6.42397	1.34e-07	1.76e-05	7.46052
AT2G24210	AT2G24210.1	terpene synthase 10 (TPS10); CONTAINS InterPro DOMAIN/s: Terpene synthase, metal-binding domain (InterPro:IPR005630), Terpenoid synthase (InterPro:IPR008949), Terpenoid cylases/protein prenyltransferase alpha-alpha toroid (InterPro:IPR008930), Terpene synthase-like (InterPro:IPR001906); BEST Arabidopsis thaliana protein match is: terpene synthase-like sequence-1,8-cineole (TAIR:AT3G25820.1); Has …	protein_coding	TERPENE SYNTHASE 10 (TPS10)	TERPENE SYNTHASE 10 (TPS10)	-1.5006	-1.97011	-3.03347	0.00428848	0.0313637	-2.01079
AT1G69030	AT1G69030.1	BSD domain-containing protein; INVOLVED IN: biological_process unknown; EXPRESSED IN: 24 plant structures; EXPRESSED DURING: 15 growth stages; CONTAINS InterPro DOMAIN/s: BSD (InterPro:IPR005607); BEST Arabidopsis thaliana protein match is: BSD domain-containing protein (TAIR:AT1G26300.1); Has 264 Blast hits to 264 proteins in 50 species: Archae - 4; Bacteria - 7; Metazoa - 53; Fungi - 11; Plants…	protein_coding			-1.50156	4.06346	-7.36395	6.86e-09	2.06e-06	10.3133
AT2G44260	AT2G44260.2	Plant protein of unknown function (DUF946); CONTAINS InterPro DOMAIN/s: Protein of unknown function DUF946 (InterPro:IPR009291); BEST Arabidopsis thaliana protein match is: Plant protein of unknown function (DUF946) (TAIR:AT2G44230.1); Has 355 Blast hits to 329 proteins in 91 species: Archae - 0; Bacteria - 23; Metazoa - 15; Fungi - 113; Plants - 198; Viruses - 0; Other Eukaryotes - 6 (source: NC…	protein_coding			-1.50178	2.17068	-3.7007	0.000663018	0.00842165	-0.434573
AT4G08870	AT4G08870.1	Encodes one of the two arginase in the genome. Gene expression is enhanced by methyl jasmonate treatment. It is involved in the defense response to B.cinerea.	protein_coding	ARGININE AMIDOHYDROLASE 2 (ARGAH2)	ARGININE AMIDOHYDROLASE 2 (ARGAH2)	-1.50476	3.28564	-6.40236	1.44e-07	1.84e-05	7.34185
AT3G48080	AT3G48080.1	alpha/beta-Hydrolases superfamily protein; FUNCTIONS IN: lipase activity, triglyceride lipase activity, signal transducer activity; INVOLVED IN: lipid metabolic process; LOCATED IN: cellular_component unknown; EXPRESSED IN: 19 plant structures; EXPRESSED DURING: 12 growth stages; CONTAINS InterPro DOMAIN/s: Lipase, class 3 (InterPro:IPR002921); BEST Arabidopsis thaliana protein match is: alpha/be…	protein_coding			-1.50561	0.683595	-2.90913	0.00595948	0.0398634	-2.362
AT5G02750	AT5G02750.1	Encodes an E3 ligase, SHOOT GRAVITROPISM9. Modulates the interaction between statoliths and F-Actin in gravity sensing.	protein_coding	SHOOT GRAVITROPISM 9 (SGR9)	SHOOT GRAVITROPISM 9 (SGR9)	-1.50707	1.0041	-3.47739	0.00125994	0.0133274	-0.950788
AT5G35490	AT5G35490.1	Encodes MRU1 (mto 1 responding up). Up-regulated in mto1-1 mutant that over-accumulates soluble methionine. A maternally expressed imprinted gene.	protein_coding	MTO 1 RESPONDING UP 1 (MRU1)	MTO 1 RESPONDING UP 1 (MRU1);ARABIDOPSIS MTO 1 RESPONDING UP 1 (ATMRU1)	-1.50888	-0.482204	-4.15798	0.000170473	0.003216	0.720813
AT1G26560	AT1G26560.1	beta glucosidase 40 (BGLU40); FUNCTIONS IN: cation binding, hydrolase activity, hydrolyzing O-glycosyl compounds, catalytic activity; INVOLVED IN: carbohydrate metabolic process; LOCATED IN: apoplast, chloroplast; EXPRESSED IN: 23 plant structures; EXPRESSED DURING: 13 growth stages; CONTAINS InterPro DOMAIN/s: Glycoside hydrolase, family 1 (InterPro:IPR001360), Glycoside hydrolase, family 1, act…	protein_coding	BETA GLUCOSIDASE 40 (BGLU40)	BETA GLUCOSIDASE 40 (BGLU40)	-1.50951	3.51186	-4.33754	9.87e-05	0.00216317	1.2007
AT1G05420	AT1G05420.1	ovate family protein 12 (OFP12); CONTAINS InterPro DOMAIN/s: Protein of unknown function DUF623 (InterPro:IPR006458); BEST Arabidopsis thaliana protein match is: ovate family protein 16 (TAIR:AT2G32100.1); Has 358 Blast hits to 358 proteins in 17 species: Archae - 0; Bacteria - 0; Metazoa - 0; Fungi - 0; Plants - 358; Viruses - 0; Other Eukaryotes - 0 (source: NCBI BLink).	protein_coding	OVATE FAMILY PROTEIN 12 (OFP12)	OVATE FAMILY PROTEIN 12 (OFP12);ARABIDOPSIS THALIANA OVATE FAMILY PROTEIN 12 (ATOFP12)	-1.51059	0.51958	-4.22482	0.000139199	0.00276253	0.992683
AT4G23750	AT4G23750.1	encodes a member of the ERF (ethylene response factor) subfamily B-5 of ERF/AP2 transcription factor family. The protein contains one AP2 domain. There are 7 members in this subfamily. Monopteros target gene.	protein_coding	CYTOKININ RESPONSE FACTOR 2 (CRF2)	CYTOKININ RESPONSE FACTOR 2 (CRF2);TARGET OF MONOPTEROS 3 (TMO3)	-1.51471	3.63065	-6.37408	1.57e-07	1.98e-05	7.25341
AT2G38310	AT2G38310.1	Encodes a member of the PYR (pyrabactin resistance )/PYL(PYR1-like)/RCAR (regulatory components of ABA receptor) family proteins with 14 members. PYR/PYL/RCAR family proteins function as abscisic acid sensors. Mediate ABA-dependent regulation of protein phosphatase 2Cs ABI1 and ABI2.	protein_coding	PYR1-LIKE 4 (PYL4)	PYR1-LIKE 4 (PYL4);REGULATORY COMPONENTS OF ABA RECEPTOR 10 (RCAR10)	-1.51743	6.53417	-3.57591	0.000950981	0.0108483	-1.11959
AT1G53035	AT1G53035.1	unknown protein; FUNCTIONS IN: molecular_function unknown; INVOLVED IN: biological_process unknown; LOCATED IN: endomembrane system; EXPRESSED IN: 23 plant structures; EXPRESSED DURING: 13 growth stages; BEST Arabidopsis thaliana protein match is: unknown protein (TAIR:AT3G15358.1); Has 49 Blast hits to 49 proteins in 9 species: Archae - 0; Bacteria - 0; Metazoa - 0; Fungi - 0; Plants - 49; Virus…	protein_coding			-1.52034	2.83676	-4.14628	0.000176615	0.00329342	0.741311
AT5G53730	AT5G53730.1	Late embryogenesis abundant (LEA) hydroxyproline-rich glycoprotein family; CONTAINS InterPro DOMAIN/s: Late embryogenesis abundant protein, group 2 (InterPro:IPR004864); BEST Arabidopsis thaliana protein match is: Late embryogenesis abundant (LEA) hydroxyproline-rich glycoprotein family (TAIR:AT3G44220.1); Has 1807 Blast hits to 1807 proteins in 277 species: Archae - 0; Bacteria - 0; Metazoa - 73…	protein_coding			-1.52574	2.39166	-4.09058	0.000208926	0.0036683	0.620224
AT3G57780	AT3G57780.1	BEST Arabidopsis thaliana protein match is: nucleolar protein gar2-related (TAIR:AT2G42320.2); Has 3163 Blast hits to 2460 proteins in 357 species: Archae - 16; Bacteria - 291; Metazoa - 841; Fungi - 335; Plants - 248; Viruses - 72; Other Eukaryotes - 1360 (source: NCBI BLink).	protein_coding			-1.52802	3.41394	-5.04078	1.1e-05	0.00045532	3.23437
AT1G65985	AT1G65985.1	Plant protein of unknown function (DUF247); FUNCTIONS IN: molecular_function unknown; INVOLVED IN: biological_process unknown; LOCATED IN: plasma membrane; CONTAINS InterPro DOMAIN/s: Protein of unknown function DUF247, plant (InterPro:IPR004158); BEST Arabidopsis thaliana protein match is: Plant protein of unknown function (DUF247) (TAIR:AT1G67150.2); Has 989 Blast hits to 918 proteins in 19 spe…	protein_coding			-1.53172	2.87715	-4.14176	0.000179045	0.00331809	0.764787
AT5G49630	AT5G49630.1	Is a high affinity amino acid transporter capable of transporting aspartate and tryptophan. May be involved in the amino acid uptake from xylem.	protein_coding	AMINO ACID PERMEASE 6 (AAP6)	AMINO ACID PERMEASE 6 (AAP6)	-1.5332	4.92817	-4.96242	1.41e-05	0.000544351	2.92745
AT1G10657	AT1G10657.1	Plant protein 1589 of unknown function; FUNCTIONS IN: molecular_function unknown; INVOLVED IN: biological_process unknown; LOCATED IN: cellular_component unknown; CONTAINS InterPro DOMAIN/s: Conserved hypothetical protein CHP01589, plant (InterPro:IPR006476); BEST Arabidopsis thaliana protein match is: Plant protein 1589 of unknown function (TAIR:AT3G55240.1); Has 115 Blast hits to 115 proteins i…	protein_coding			-1.53373	0.446301	-5.26757	5.38e-06	0.000275476	3.89773
AT1G54790	AT1G54790.2	GDSL-like Lipase/Acylhydrolase superfamily protein; FUNCTIONS IN: hydrolase activity, acting on ester bonds, carboxylesterase activity; INVOLVED IN: lipid metabolic process; LOCATED IN: endomembrane system; EXPRESSED IN: 16 plant structures; EXPRESSED DURING: 8 growth stages; CONTAINS InterPro DOMAIN/s: Lipase, GDSL (InterPro:IPR001087); BEST Arabidopsis thaliana protein match is: GDSL-like Lipas…	protein_coding			-1.53393	1.51011	-3.15577	0.00308325	0.0247095	-1.73039
AT1G45010	AT1G45010.1	TRAM, LAG1 and CLN8 (TLC) lipid-sensing domain containing protein; FUNCTIONS IN: molecular_function unknown; INVOLVED IN: biological_process unknown; LOCATED IN: endomembrane system, integral to membrane; CONTAINS InterPro DOMAIN/s: TRAM/LAG1/CLN8 homology domain (InterPro:IPR006634); BEST Arabidopsis thaliana protein match is: TRAM, LAG1 and CLN8 (TLC) lipid-sensing domain containing protein (TA…	protein_coding			-1.53453	2.40291	-4.07003	0.000222247	0.00382502	0.495852
AT3G17390	AT3G17390.1	S-adenosylmethionine synthetase	protein_coding	METHIONINE OVER-ACCUMULATOR 3 (MTO3)	METHIONINE ADENOSYLTRANSFERASE 4 (MAT4);METHIONINE OVER-ACCUMULATOR 3 (MTO3);S-ADENOSYLMETHIONINE SYNTHETASE 3 (SAMS3)	-1.53954	8.99873	-4.93319	1.55e-05	0.000582947	2.87617
AT2G39850	AT2G39850.1	Subtilisin-like serine endopeptidase family protein; FUNCTIONS IN: identical protein binding, serine-type endopeptidase activity; INVOLVED IN: proteolysis, negative regulation of catalytic activity; LOCATED IN: plant-type cell wall; EXPRESSED IN: 20 plant structures; EXPRESSED DURING: 10 growth stages; CONTAINS InterPro DOMAIN/s: Peptidase S8/S53, subtilisin/kexin/sedolisin (InterPro:IPR000209), …	protein_coding			-1.54427	1.09129	-6.24446	2.38e-07	2.62e-05	6.84484
AT1G26820	AT1G26820.1	Encodes ribonuclease RNS3.	protein_coding	RIBONUCLEASE 3 (RNS3)	RIBONUCLEASE 3 (RNS3)	-1.54564	2.62608	-3.05584	0.00403911	0.0300848	-2.037
AT4G15620	AT4G15620.1	Uncharacterised protein family (UPF0497); CONTAINS InterPro DOMAIN/s: Uncharacterised protein family UPF0497, trans-membrane plant (InterPro:IPR006702), Uncharacterised protein family UPF0497, trans-membrane plant subgroup (InterPro:IPR006459); BEST Arabidopsis thaliana protein match is: Uncharacterised protein family (UPF0497) (TAIR:AT4G15630.1); Has 622 Blast hits to 622 proteins in 21 species:…	protein_coding			-1.54581	0.964683	-3.88973	0.000380635	0.00562831	-0.0184573
AT1G51805	AT1G51805.1	Leucine-rich repeat protein kinase family protein; FUNCTIONS IN: protein serine/threonine kinase activity, protein kinase activity, kinase activity, ATP binding; INVOLVED IN: protein amino acid phosphorylation; LOCATED IN: endomembrane system; EXPRESSED IN: 20 plant structures; EXPRESSED DURING: 13 growth stages; CONTAINS InterPro DOMAIN/s: Protein kinase, ATP binding site (InterPro:IPR017441), P…	protein_coding			-1.5512	3.58446	-5.29907	4.87e-06	0.000256784	3.92682
AT1G41830	AT1G41830.1	SKU5-similar 6 (SKS6); FUNCTIONS IN: pectinesterase activity; INVOLVED IN: oxidation reduction; LOCATED IN: apoplast, cell wall, membrane, plant-type cell wall; EXPRESSED IN: 23 plant structures; EXPRESSED DURING: 13 growth stages; CONTAINS InterPro DOMAIN/s: Cupredoxin (InterPro:IPR008972), Multicopper oxidase, type 2 (InterPro:IPR011706), Multicopper oxidase, type 3 (InterPro:IPR011707), Multic…	protein_coding	SKU5-SIMILAR 6 (SKS6)	SKU5-SIMILAR 6 (SKS6);SKU5 SIMILAR 6 (sks6)	-1.55875	6.10323	-5.57905	2e-06	0.000127539	4.77258
AT2G22190	AT2G22190.1	Haloacid dehalogenase-like hydrolase (HAD) superfamily protein; FUNCTIONS IN: catalytic activity, trehalose-phosphatase activity; INVOLVED IN: trehalose biosynthetic process, metabolic process; LOCATED IN: cellular_component unknown; EXPRESSED IN: 23 plant structures; EXPRESSED DURING: 12 growth stages; CONTAINS InterPro DOMAIN/s: HAD-superfamily hydrolase, subfamily IIB (InterPro:IPR006379), Tre…	protein_coding	TREHALOSE-6-PHOSPHATE PHOSPHATASE E (TPPE)	TREHALOSE-6-PHOSPHATE PHOSPHATASE E (TPPE)	-1.56039	2.76691	-3.55393	0.00101287	0.0112943	-1.04626
AT2G12462	AT2G12462.1	BEST Arabidopsis thaliana protein match is: Sterile alpha motif (SAM) domain-containing protein (TAIR:AT1G15760.1); Has 35333 Blast hits to 34131 proteins in 2444 species: Archae - 798; Bacteria - 22429; Metazoa - 974; Fungi - 991; Plants - 531; Viruses - 0; Other Eukaryotes - 9610 (source: NCBI BLink).	protein_coding			-1.56739	2.18092	-3.0422	0.00418947	0.0308438	-1.97386
AT1G48500	AT1G48500.1	jasmonate-zim-domain protein 4 (JAZ4); CONTAINS InterPro DOMAIN/s: Tify (InterPro:IPR010399), CCT domain-like (InterPro:IPR018467); BEST Arabidopsis thaliana protein match is: jasmonate-zim-domain protein 3 (TAIR:AT3G17860.1); Has 328 Blast hits to 328 proteins in 29 species: Archae - 0; Bacteria - 0; Metazoa - 0; Fungi - 1; Plants - 326; Viruses - 0; Other Eukaryotes - 1 (source: NCBI BLink).	protein_coding	JASMONATE-ZIM-DOMAIN PROTEIN 4 (JAZ4)	TIFY DOMAIN PROTEIN 6A (TIFY6A);JASMONATE-ZIM-DOMAIN PROTEIN 4 (JAZ4)	-1.56863	0.888052	-3.66116	0.000743677	0.00908986	-0.491649
AT3G50970	AT3G50970.1	Belongs to the dehydrin protein family, which contains highly conserved stretches of 7-17 residues that are repetitively scattered in their sequences, the K-, S-, Y- and lysine rich segments. LTI29 and LTI30 double overexpressors confer freeze tolerance. Located in membranes. mRNA upregulated by water deprivation and abscisic acid.	protein_coding	LOW TEMPERATURE-INDUCED 30 (LTI30)	(XERO2);LOW TEMPERATURE-INDUCED 30 (LTI30)	-1.56902	4.37638	-4.48212	6.33e-05	0.00160656	1.51265
AT3G51750	AT3G51750.1	unknown protein; Has 15 Blast hits to 14 proteins in 5 species: Archae - 0; Bacteria - 0; Metazoa - 0; Fungi - 0; Plants - 15; Viruses - 0; Other Eukaryotes - 0 (source: NCBI BLink).	protein_coding			-1.57031	-0.538951	-4.04662	0.000238436	0.0039994	0.510019
AT3G25882	AT3G25882.1	encodes a kinase that physically interacts with NPR1/NIM1	protein_coding	NIM1-INTERACTING 2 (NIMIN-2)	NIM1-INTERACTING 2 (NIMIN-2)	-1.57401	0.823985	-3.37752	0.0016702	0.0162659	-1.28072
AT1G09310	AT1G09310.1	Protein of unknown function, DUF538; INVOLVED IN: biological_process unknown; LOCATED IN: apoplast; EXPRESSED IN: 22 plant structures; EXPRESSED DURING: 14 growth stages; CONTAINS InterPro DOMAIN/s: Protein of unknown function DUF538 (InterPro:IPR007493); BEST Arabidopsis thaliana protein match is: Protein of unknown function, DUF538 (TAIR:AT1G56580.1); Has 409 Blast hits to 409 proteins in 33 sp…	protein_coding			-1.57559	7.35519	-6.66331	6.26e-08	1.01e-05	8.17066
AT1G69040	AT1G69040.2	ACT-domain containing protein involved in feedback regulation of amino acid metabolism	protein_coding	ACT DOMAIN REPEAT 4 (ACR4)	ACT DOMAIN REPEAT 4 (ACR4)	-1.57639	6.24557	-6.55188	8.92e-08	1.31e-05	7.81826
AT3G58990	AT3G58990.1	isopropylmalate isomerase 1 (IPMI1); FUNCTIONS IN: hydro-lyase activity, 3-isopropylmalate dehydratase activity; INVOLVED IN: leucine biosynthetic process, metabolic process; LOCATED IN: plastid; EXPRESSED IN: 19 plant structures; EXPRESSED DURING: 9 growth stages; CONTAINS InterPro DOMAIN/s: 3-isopropylmalate dehydratase, small subunit-like (InterPro:IPR012305), Aconitase A/isopropylmalate dehyd…	protein_coding	ISOPROPYLMALATE ISOMERASE 1 (IPMI1)	ISOPROPYLMALATE ISOMERASE 1 (IPMI1)	-1.58063	1.09264	-2.88416	0.00636156	0.0417027	-2.35334
AT5G44680	AT5G44680.1	DNA glycosylase superfamily protein; FUNCTIONS IN: DNA-3-methyladenine glycosylase I activity, catalytic activity; INVOLVED IN: DNA repair, base-excision repair; EXPRESSED IN: 21 plant structures; EXPRESSED DURING: 13 growth stages; CONTAINS InterPro DOMAIN/s: DNA glycosylase (InterPro:IPR011257), Methyladenine glycosylase (InterPro:IPR005019); BEST Arabidopsis thaliana protein match is: DNA glyc…	protein_coding			-1.58072	5.30861	-4.86856	1.9e-05	0.00067327	2.62182
AT3G52370	AT3G52370.1	FASCICLIN-like arabinogalactan protein 15 precursor (FLA15); INVOLVED IN: cell adhesion; LOCATED IN: endomembrane system; EXPRESSED IN: 21 plant structures; EXPRESSED DURING: 13 growth stages; CONTAINS InterPro DOMAIN/s: FAS1 domain (InterPro:IPR000782); BEST Arabidopsis thaliana protein match is: FASCICLIN-like arabinogalactan protein 16 precursor (TAIR:AT2G35860.1); Has 1194 Blast hits to 1139 …	protein_coding	FASCICLIN-LIKE ARABINOGALACTAN PROTEIN 15 PRECURSOR (FLA15)	FASCICLIN-LIKE ARABINOGALACTAN PROTEIN 15 PRECURSOR (FLA15)	-1.58138	3.00162	-3.69915	0.00066601	0.00844458	-0.504708
AT2G38360	AT2G38360.1	prenylated RAB acceptor 1.B4 (PRA1.B4); CONTAINS InterPro DOMAIN/s: Prenylated rab acceptor PRA1 (InterPro:IPR004895); BEST Arabidopsis thaliana protein match is: prenylated RAB acceptor 1.B5 (TAIR:AT5G01640.1); Has 506 Blast hits to 506 proteins in 121 species: Archae - 0; Bacteria - 0; Metazoa - 113; Fungi - 53; Plants - 299; Viruses - 0; Other Eukaryotes - 41 (source: NCBI BLink).	protein_coding	PRENYLATED RAB ACCEPTOR 1.B4 (PRA1.B4)	PRENYLATED RAB ACCEPTOR 1.B4 (PRA1.B4)	-1.58307	3.82809	-4.72717	2.96e-05	0.000931938	2.35465
AT2G44690	AT2G44690.1	A member of ROP GTPase gene family.	protein_coding	ARABIDOPSIS RAC-LIKE 9 (ARAC9)	RHO-RELATED PROTEIN FROM PLANTS 8 (ROP8);RHO-RELATED PROTEIN FROM PLANTS 8 (ATROP8);ARABIDOPSIS RAC-LIKE 9 (ARAC9)	-1.58351	0.383515	-3.45665	0.00133628	0.0138353	-0.998221
AT2G22240	AT2G22240.1	** Referred to as MIPS1 in Mitsuhashi et al 2008. Myo-inositol-1-phosphate synthase isoform 2. Expressed in leaf, root and silique. Immunolocalization experiments with an antibody recognizing MIPS1, MIPS2, and MIPS3 showed endosperm localization.	protein_coding	MYO-INOSITOL-1-PHOSPHATE SYNTHASE 2 (MIPS2)	INOSITOL 3-PHOSPHATE SYNTHASE 2 (ATIPS2);MYO-INOSITOL-1-PHOSPHATE SYNTHASE 2 (MIPS2);MYO-INOSITOL-1-PHOSPHATE SYNTHASE 1 (MIPS1);MYO-INOSITOL-1-PHOSPHATE SYNTHASE 1 (ATMIPS1);MYO-INOSITOL-1-PHOSTPATE SYNTHASE 2 (ATMIPS2)	-1.58426	4.46008	-5.35246	4.11e-06	0.00022373	4.20147
AT1G03870	AT1G03870.1	fasciclin-like arabinogalactan-protein 9 (Fla9)	protein_coding	FASCICLIN-LIKE ARABINOOGALACTAN 9 (FLA9)	FASCICLIN-LIKE ARABINOOGALACTAN 9 (FLA9)	-1.5858	7.37071	-5.23697	5.93e-06	0.000296385	3.71413
AT5G09870	AT5G09870.1	Encodes a cellulose synthase isomer, related to CESA6. As inferred from the null role of secondary wall-type CesAs, included in a set of five primary wall-type CesAs that may support trichome cell wall thickening.	protein_coding	CELLULOSE SYNTHASE 5 (CESA5)	CELLULOSE SYNTHASE 5 (CESA5)	-1.5913	6.43765	-7.25176	9.75e-09	2.8e-06	9.96379
AT3G01960	AT3G01960.1	unknown protein; Has 13 Blast hits to 13 proteins in 5 species: Archae - 0; Bacteria - 0; Metazoa - 0; Fungi - 0; Plants - 13; Viruses - 0; Other Eukaryotes - 0 (source: NCBI BLink).	protein_coding			-1.59489	0.06995	-3.9567	0.000311975	0.00485563	0.203807
AT5G02760	AT5G02760.1	Protein phosphatase 2C family protein; FUNCTIONS IN: protein serine/threonine phosphatase activity, catalytic activity; INVOLVED IN: protein amino acid dephosphorylation; LOCATED IN: protein serine/threonine phosphatase complex; EXPRESSED IN: 15 plant structures; EXPRESSED DURING: 10 growth stages; CONTAINS InterPro DOMAIN/s: Protein phosphatase 2C, manganese/magnesium aspartate binding site (Int…	protein_coding			-1.59564	3.86953	-3.93087	0.000336894	0.00516997	-0.103654
AT3G28857	AT3G28857.1	Encodes a atypical member of the bHLH (basic helix-loop-helix) family transcriptional factors.	protein_coding	PACLOBUTRAZOL RESISTANCE 5 (PRE5)	PACLOBUTRAZOL RESISTANCE 5 (PRE5)	-1.59626	0.0507355	-2.79586	0.00799514	0.0491442	-2.47973
AT1G55180	AT1G55180.1	member of C2-PLD. subfamily Represents a phospholipase D (PLD) gene with four exons, hence it is a member of the alpha class. Its amino acid sequence is quite different from other PLDs, therefore it might possess unique structural and/or catalytic properties.	protein_coding	PHOSPHOLIPASE D ALPHA 4 (PLDEPSILON)	PHOSPHOLIPASE D ALPHA 4 (PLDEPSILON); (PLDALPHA4)	-1.59647	1.04529	-3.34075	0.00185121	0.0174617	-1.27492
AT2G12400	AT2G12400.1	unknown protein; FUNCTIONS IN: molecular_function unknown; INVOLVED IN: biological_process unknown; LOCATED IN: endomembrane system; EXPRESSED IN: 25 plant structures; EXPRESSED DURING: 13 growth stages; BEST Arabidopsis thaliana protein match is: unknown protein (TAIR:AT2G25270.1); Has 177 Blast hits to 172 proteins in 23 species: Archae - 0; Bacteria - 2; Metazoa - 3; Fungi - 0; Plants - 164; V…	protein_coding			-1.60034	5.20084	-5.22562	6.15e-06	0.000305076	3.74184
AT4G11550	AT4G11550.1	Cysteine/Histidine-rich C1 domain family protein; FUNCTIONS IN: zinc ion binding; INVOLVED IN: intracellular signaling pathway; LOCATED IN: cellular_component unknown; EXPRESSED IN: hypocotyl, root, pedicel; EXPRESSED DURING: 4 anthesis; CONTAINS InterPro DOMAIN/s: Protein kinase C-like, phorbol ester/diacylglycerol binding (InterPro:IPR002219), DC1 (InterPro:IPR004146), Zinc finger, PHD-type (In…	protein_coding			-1.60539	0.561508	-2.86416	0.00670162	0.0431521	-2.33813
AT3G48740	AT3G48740.1	Encodes a member of the SWEET sucrose efflux transporter family proteins.	protein_coding	(SWEET11)	(SWEET11); (AtSWEET11)	-1.60543	6.19949	-6.72098	5.21e-08	9.02e-06	8.32743
AT4G27310	AT4G27310.1	B-box type zinc finger family protein; FUNCTIONS IN: sequence-specific DNA binding transcription factor activity, zinc ion binding; INVOLVED IN: regulation of transcription; LOCATED IN: intracellular; CONTAINS InterPro DOMAIN/s: Zinc finger, B-box (InterPro:IPR000315); BEST Arabidopsis thaliana protein match is: B-box type zinc finger family protein (TAIR:AT5G54470.1); Has 1807 Blast hits to 1807…	protein_coding			-1.60612	5.35105	-7.82073	1.66e-09	7.24e-07	11.6992
AT4G35900	AT4G35900.1	bZIP protein required for positive regulation of flowering. Mutants are late flowering. FD interacts with FT to promote flowering.Expressed in the shoot apex in floral anlagen, then declines in floral primordia.	protein_coding	(FD)	(atbzip14); (FD-1); (FD)	-1.6093	2.67433	-4.50663	5.87e-05	0.00151767	1.6579
AT4G01740	AT4G01740.1	Cysteine/Histidine-rich C1 domain family protein; CONTAINS InterPro DOMAIN/s: DC1 (InterPro:IPR004146), C1-like (InterPro:IPR011424); BEST Arabidopsis thaliana protein match is: Cysteine/Histidine-rich C1 domain family protein (TAIR:AT4G01930.1); Has 1534 Blast hits to 622 proteins in 21 species: Archae - 0; Bacteria - 0; Metazoa - 4; Fungi - 0; Plants - 1528; Viruses - 0; Other Eukaryotes - 2 (s…	protein_coding			-1.60989	2.41155	-5.172	7.29e-06	0.000342212	3.66439
AT4G14940	AT4G14940.1	atao1 gene of Arabidopsis thaliana encodes an extracellular copper amine oxidase expressed during early stages of vascular tissue development.	protein_coding	AMINE OXIDASE 1 (AO1)	AMINE OXIDASE 1 (ATAO1);AMINE OXIDASE 1 (AO1)	-1.61031	1.57079	-3.6778	0.000708642	0.00879478	-0.451416
AT5G48900	AT5G48900.1	Pectin lyase-like superfamily protein; FUNCTIONS IN: lyase activity, pectate lyase activity; LOCATED IN: endomembrane system; EXPRESSED IN: 22 plant structures; EXPRESSED DURING: 14 growth stages; CONTAINS InterPro DOMAIN/s: Pectin lyase fold/virulence factor (InterPro:IPR011050), AmbAllergen (InterPro:IPR018082), Pectate lyase/Amb allergen (InterPro:IPR002022), Pectin lyase fold (InterPro:IPR012…	protein_coding			-1.61582	4.83191	-6.8077	3.96e-08	7.42e-06	8.63608
AT2G41090	AT2G41090.1	Calcium-binding EF-hand family protein; FUNCTIONS IN: calcium ion binding; LOCATED IN: cellular_component unknown; EXPRESSED IN: 21 plant structures; EXPRESSED DURING: 14 growth stages; CONTAINS InterPro DOMAIN/s: EF-Hand 1, calcium-binding site (InterPro:IPR018247), EF-HAND 2 (InterPro:IPR018249), EF-hand-like domain (InterPro:IPR011992), Calcium-binding EF-hand (InterPro:IPR002048), EF-hand (In…	protein_coding			-1.61866	4.39913	-6.50209	1.05e-07	1.5e-05	7.66686
AT5G04230	AT5G04230.2	Member of Phenylalanine ammonialyase (PAL) gene family. Differs significantly from PAL1 and PAL2 and other sequenced plant PAL genes. Arabidopsis has four PALs: AT2G37040 (PAL1), AT3G53260 (PAL2), AT5G04230 (PAL3) and AT3G10340 (PAL4).	protein_coding	PHENYL ALANINE AMMONIA-LYASE 3 (PAL3)	PHENYL ALANINE AMMONIA-LYASE 3 (PAL3)	-1.6194	3.44984	-8.23538	4.64e-10	3.64e-07	12.9241
AT3G04030	AT3G04030.3	Homeodomain-like superfamily protein; FUNCTIONS IN: sequence-specific DNA binding transcription factor activity; INVOLVED IN: regulation of transcription; EXPRESSED IN: 9 plant structures; EXPRESSED DURING: 4 anthesis, 4 leaf senescence stage, petal differentiation and expansion stage; CONTAINS InterPro DOMAIN/s: Homeodomain-like (InterPro:IPR009057), Myb, DNA-binding (InterPro:IPR014778), Myb-li…	protein_coding	(MYR2)	(MYR2)	-1.62097	2.01689	-3.62679	0.00082139	0.00977152	-0.601411
AT2G37580	AT2G37580.1	RING/U-box superfamily protein; CONTAINS InterPro DOMAIN/s: Zinc finger, RING-type (InterPro:IPR001841), Zinc finger, C3HC4 RING-type (InterPro:IPR018957); BEST Arabidopsis thaliana protein match is: RING/U-box superfamily protein (TAIR:AT4G17905.1); Has 8117 Blast hits to 8098 proteins in 285 species: Archae - 0; Bacteria - 0; Metazoa - 1838; Fungi - 580; Plants - 4554; Viruses - 68; Other Eukar…	protein_coding			-1.62507	0.631085	-3.60911	0.00086438	0.0101224	-0.634101
AT5G03350	AT5G03350.1	Legume lectin family protein; FUNCTIONS IN: carbohydrate binding, binding; INVOLVED IN: biological_process unknown; LOCATED IN: apoplast, cell wall, chloroplast; EXPRESSED IN: 19 plant structures; EXPRESSED DURING: 12 growth stages; CONTAINS InterPro DOMAIN/s: Legume lectin, beta chain (InterPro:IPR001220), Concanavalin A-like lectin/glucanase, subgroup (InterPro:IPR013320), Concanavalin A-like l…	protein_coding			-1.63188	0.789535	-4.29405	0.00011273	0.00238142	0.884785
AT4G12910	AT4G12910.1	serine carboxypeptidase-like 20 (scpl20); FUNCTIONS IN: serine-type carboxypeptidase activity; INVOLVED IN: proteolysis; LOCATED IN: vacuole; EXPRESSED IN: 23 plant structures; EXPRESSED DURING: 13 growth stages; CONTAINS InterPro DOMAIN/s: Peptidase S10, serine carboxypeptidase (InterPro:IPR001563), Peptidase S10, serine carboxypeptidase, active site (InterPro:IPR018202); BEST Arabidopsis thalia…	protein_coding	SERINE CARBOXYPEPTIDASE-LIKE 20 (scpl20)	SERINE CARBOXYPEPTIDASE-LIKE 20 (scpl20)	-1.63239	3.77277	-4.39759	8.21e-05	0.00190991	1.2985
AT1G55760	AT1G55760.1	BTB/POZ domain-containing protein; CONTAINS InterPro DOMAIN/s: BTB/POZ (InterPro:IPR013069), BTB/POZ fold (InterPro:IPR011333), Kelch related (InterPro:IPR013089), BTB/POZ-like (InterPro:IPR000210); BEST Arabidopsis thaliana protein match is: BTB/POZ domain-containing protein (TAIR:AT1G21780.2); Has 5280 Blast hits to 5249 proteins in 149 species: Archae - 0; Bacteria - 0; Metazoa - 3933; Fungi -…	protein_coding			-1.63377	3.79165	-3.90934	0.00035914	0.00541728	-0.00787394
AT2G32870	AT2G32870.1	TRAF-like family protein; FUNCTIONS IN: molecular_function unknown; INVOLVED IN: biological_process unknown; LOCATED IN: cellular_component unknown; EXPRESSED IN: cotyledon; CONTAINS InterPro DOMAIN/s: TRAF-like (InterPro:IPR008974), MATH (InterPro:IPR002083), TRAF-type (InterPro:IPR013322); BEST Arabidopsis thaliana protein match is: TRAF-like family protein (TAIR:AT2G32880.1); Has 35333 Blast h…	protein_coding			-1.64293	0.352884	-4.34074	9.77e-05	0.00214657	1.15169
AT4G27560	AT4G27560.1	UDP-Glycosyltransferase superfamily protein; FUNCTIONS IN: transferase activity, transferring glycosyl groups; INVOLVED IN: response to salt stress, N-terminal protein myristoylation; LOCATED IN: cellular_component unknown; EXPRESSED IN: guard cell; CONTAINS InterPro DOMAIN/s: UDP-glucuronosyl/UDP-glucosyltransferase (InterPro:IPR002213); BEST Arabidopsis thaliana protein match is: UDP-Glycosyltr…	protein_coding			-1.64441	2.101	-4.93786	1.53e-05	0.000576507	2.84473
AT5G10770	AT5G10770.1	Eukaryotic aspartyl protease family protein; FUNCTIONS IN: DNA binding, aspartic-type endopeptidase activity; INVOLVED IN: proteolysis; EXPRESSED IN: 12 plant structures; EXPRESSED DURING: 4 anthesis, C globular stage, petal differentiation and expansion stage, E expanded cotyledon stage; CONTAINS InterPro DOMAIN/s: Peptidase aspartic (InterPro:IPR021109), Peptidase aspartic, catalytic (InterPro:…	protein_coding			-1.64632	5.0302	-3.65655	0.000753663	0.0091684	-0.671171
AT2G04032	AT2G04032.1	zinc transporter 7 precursor (ZIP7); FUNCTIONS IN: cation transmembrane transporter activity, zinc ion transmembrane transporter activity, metal ion transmembrane transporter activity; INVOLVED IN: cation transport, zinc ion transport, metal ion transport, transmembrane transport; LOCATED IN: endomembrane system, integral to membrane, membrane; EXPRESSED IN: 12 plant structures; EXPRESSED DURING:…	protein_coding	ZINC TRANSPORTER 7 PRECURSOR (ZIP7)	ZINC TRANSPORTER 7 PRECURSOR (ZIP7)	-1.64718	-1.69835	-4.5525	5.09e-05	0.00138775	1.89958
AT5G44400	AT5G44400.1	FAD-binding Berberine family protein; FUNCTIONS IN: electron carrier activity, oxidoreductase activity, FAD binding, catalytic activity; LOCATED IN: cell wall; EXPRESSED IN: 18 plant structures; EXPRESSED DURING: 10 growth stages; CONTAINS InterPro DOMAIN/s: FAD-linked oxidase, FAD-binding, subdomain 2 (InterPro:IPR016168), FAD-binding, type 2 (InterPro:IPR016166), Berberine/berberine-like (Inter…	protein_coding			-1.648	1.50442	-6.48819	1.09e-07	1.55e-05	7.64916
AT2G12461	AT2G12461.1	unknown protein; Has 30201 Blast hits to 17322 proteins in 780 species: Archae - 12; Bacteria - 1396; Metazoa - 17338; Fungi - 3422; Plants - 5037; Viruses - 0; Other Eukaryotes - 2996 (source: NCBI BLink).	protein_coding			-1.64801	-0.0345857	-2.92361	0.0057374	0.0387482	-2.21156
AT5G47330	AT5G47330.1	alpha/beta-Hydrolases superfamily protein; FUNCTIONS IN: palmitoyl-(protein) hydrolase activity; INVOLVED IN: response to salt stress; LOCATED IN: endomembrane system; EXPRESSED IN: 12 plant structures; EXPRESSED DURING: LP.06 six leaves visible, LP.04 four leaves visible, 4 anthesis, petal differentiation and expansion stage; CONTAINS InterPro DOMAIN/s: Palmitoyl protein thioesterase (InterPro:I…	protein_coding			-1.65108	1.06454	-3.94955	0.000318692	0.00493842	0.219706
AT4G12030	AT4G12030.2	Required for the biosynthesis of methionine-derived glucosinolates. Involved in the transport of 2-keto acids between chloroplasts and the cytosol.	protein_coding	BILE ACID TRANSPORTER 5 (BAT5)	BILE ACID TRANSPORTER 5 (BAT5);BILE ACID:SODIUM SYMPORTER FAMILY PROTEIN 5 (BASS5)	-1.65138	1.25853	-3.51116	0.00114452	0.0123945	-0.894303
AT4G16740	AT4G16740.1	Encodes an (E,E)-alpha-farnesene synthase in the Col ecotype of Arabidopsis. This enzyme can also catalyze the formation of (E)-beta-ocimene as well as trace amounts of myrcene and other related compounds in vitro. The cytosolic localization of the protein may make it favor (E,E)-alpha-farnesene biosynthesis because the precursor of this product, FPP, is primarily cytosolic. Transcript levels for…	protein_coding	TERPENE SYNTHASE 03 (TPS03)	TERPENE SYNTHASE 03 (ATTPS03);TERPENE SYNTHASE 03 (TPS03)	-1.6534	-1.67279	-2.95214	0.00532238	0.0366674	-2.19138
AT2G10940	AT2G10940.1	Bifunctional inhibitor/lipid-transfer protein/seed storage 2S albumin superfamily protein; FUNCTIONS IN: lipid binding; INVOLVED IN: lipid transport; LOCATED IN: chloroplast thylakoid membrane, apoplast, chloroplast, membrane; EXPRESSED IN: 21 plant structures; EXPRESSED DURING: 13 growth stages; CONTAINS InterPro DOMAIN/s: Bifunctional inhibitor/plant lipid transfer protein/seed storage (InterPr…	protein_coding			-1.6551	8.66667	-3.36676	0.00172134	0.0166405	-1.524
AT4G13495	AT4G13495.1	Unknown gene	other_rna			-1.65659	4.73127	-5.73519	1.21e-06	9.02e-05	5.29148
AT2G46430	AT2G46430.1	cyclic nucleotide gated channel (CNGC4), downstream component of the signaling pathways leading to HR/resistance	protein_coding	CYCLIC NUCLEOTIDE GATED CHANNEL 3 (CNGC3)	(CNGC3.C);CYCLIC NUCLEOTIDE GATED CHANNEL 3 (ATCNGC3);CYCLIC NUCLEOTIDE GATED CHANNEL 3 (CNGC3)	-1.65794	1.90379	-3.18968	0.00281073	0.0232076	-1.98426
AT5G06820	AT5G06820.1	STRUBBELIG-receptor family 2 (SRF2); FUNCTIONS IN: protein serine/threonine kinase activity, kinase activity, ATP binding; INVOLVED IN: transmembrane receptor protein tyrosine kinase signaling pathway, protein amino acid phosphorylation; LOCATED IN: endomembrane system; EXPRESSED IN: flower; EXPRESSED DURING: petal differentiation and expansion stage; CONTAINS InterPro DOMAIN/s: Serine/threonine-…	protein_coding	STRUBBELIG-RECEPTOR FAMILY 2 (SRF2)	STRUBBELIG-RECEPTOR FAMILY 2 (SRF2)	-1.6599	0.199725	-3.08582	0.0037264	0.0284006	-1.85947
AT3G05800	AT3G05800.1	AtBS1(activation-tagged BRI1 suppressor 1)-interacting factor 1 (AIF1); BEST Arabidopsis thaliana protein match is: basic helix-loop-helix (bHLH) DNA-binding superfamily protein (TAIR:AT1G09250.1); Has 150 Blast hits to 150 proteins in 12 species: Archae - 0; Bacteria - 0; Metazoa - 0; Fungi - 0; Plants - 150; Viruses - 0; Other Eukaryotes - 0 (source: NCBI BLink).	protein_coding	ATBS1(ACTIVATION-TAGGED BRI1 SUPPRESSOR 1)-INTERACTING FACTOR 1 (AIF1)	ATBS1(ACTIVATION-TAGGED BRI1 SUPPRESSOR 1)-INTERACTING FACTOR 1 (AIF1)	-1.66028	3.08859	-6.09363	3.85e-07	3.85e-05	6.39594
AT4G15070	AT4G15070.1	Cysteine/Histidine-rich C1 domain family protein; FUNCTIONS IN: molecular_function unknown; INVOLVED IN: intracellular signaling pathway; LOCATED IN: cellular_component unknown; CONTAINS InterPro DOMAIN/s: Protein kinase C-like, phorbol ester/diacylglycerol binding (InterPro:IPR002219), DC1 (InterPro:IPR004146), C1-like (InterPro:IPR011424); BEST Arabidopsis thaliana protein match is: Cysteine/Hi…	protein_coding			-1.66611	1.71262	-4.6518	3.74e-05	0.00111363	2.17935
AT3G13520	AT3G13520.1	Encodes a GPI-anchored arabinogalactan (AG) peptide with a short 'classical' backbone of 10 amino acids, seven of which are conserved among the 4 other Arabidopsis AG peptides. These peptides may be involved in cell signaling.	protein_coding	ARABINOGALACTAN PROTEIN 12 (AGP12)	ARABINOGALACTAN PROTEIN 12 (AGP12); (ATAGP12)	-1.67255	6.94053	-6.35522	1.67e-07	2.08e-05	7.18825
AT3G55760	AT3G55760.1	unknown protein; LOCATED IN: chloroplast stroma, chloroplast; EXPRESSED IN: 16 plant structures; EXPRESSED DURING: 10 growth stages; BEST Arabidopsis thaliana protein match is: unknown protein (TAIR:AT1G42430.2); Has 176 Blast hits to 125 proteins in 40 species: Archae - 0; Bacteria - 3; Metazoa - 19; Fungi - 9; Plants - 81; Viruses - 0; Other Eukaryotes - 64 (source: NCBI BLink).	protein_coding			-1.67566	4.01705	-7.99513	9.67e-10	5.08e-07	12.2177
AT1G28230	AT1G28230.1	Encodes a transporter that transports purines,cytokinins and other adenine derivatives. Expressed in the leaf hydathodes where it may be involved in re-uptake of cytokinins during guttation.	protein_coding	PURINE PERMEASE 1 (PUP1)	PURINE PERMEASE 1 (PUP1); (ATPUP1)	-1.67911	3.55024	-3.47592	0.00126521	0.0133764	-1.08618
AT5G44565	AT5G44565.1	unknown protein; FUNCTIONS IN: molecular_function unknown; INVOLVED IN: biological_process unknown; LOCATED IN: endomembrane system; Has 35333 Blast hits to 34131 proteins in 2444 species: Archae - 798; Bacteria - 22429; Metazoa - 974; Fungi - 991; Plants - 531; Viruses - 0; Other Eukaryotes - 9610 (source: NCBI BLink).	protein_coding			-1.68138	-0.103146	-3.19439	0.00277468	0.0230186	-1.66331
[truncated: 315 more rows]

## Sheet: 1-JL-ccr2-GO
			GO_acc	term_type	Term	queryitem	querytotal	bgitem	bgtotal	pvalue	FDR	entries
[truncated: 325 more rows]

## Sheet: 2-JL-rccr2#155
gene	Locus.Identifier	Gene.Model.Name	Gene.Model.Description	Gene.Model.Type	Primary.Gene.Symbol	logFC	AveExpr	t	P.Value	adj.P.Val	B
[truncated: 5,550 more rows]

## Sheet: 2-JL-rccr2#155-GO
			GO_acc	term_type	Term	queryitem	querytotal	bgitem	bgtotal	pvalue	FDR	entries
[truncated: 677 more rows]

[truncated: 1 more sheets: 3-JL-ccr2 vs rccr2#155]
