# Supplementary material for: A cis-carotene derived apocarotenoid regulates etioplast and chloroplast development
Source: eLife. 2020 Jan 31;9:e45310. doi: 10.7554/eLife.45310 (PMC6994220; doi:10.7554/eLife.45310)
Supplement: Supplementary file 5. [file elife-45310-supp5.xlsx]

## Sheet: JL vs ES-Contra-DE genes
Supplementary file 5: Significantly expressed genes regulated in ccr2 and contra-regulated ccr2 ziso-155 that are common to both etiolated and immature leaf tissues
			WT	Wild Type
			FC	Fold Change
			NF	Norflurazon
			Fr	Far Red light Treatment
			DE	Differentially Expressed
			JL	Juvenile Leaves
			ES	Etiolated Seedlings
			GO	Geneontology
			Contra-Regulated Gene Data Set					Koussevitzky et al., 2007			Martin et al., 2015		Page et al., 2017
			Juvenile Leaves-FC		Etiolated Seedlings-FC			De-etiolated Seedlings-FC			De-etiolated Seedlings-FC		De-etiolated Seedlings-FC
Gene List	gene	Gene.Model.Name	ccr2 vs WT	rccr2#155 vs WT	ccr2 vs WT	rccr2#155 vs WT		NF	gun5		FC WT/WTLinc		WT NF down	WT NF up	WT Fr down	WT Fr up
De-regulated in both	At1g09530	PIF3_PAP3_POC1__phytochrome interacting factor 3 (PIF3), identical to phytochrome interacting factor 3 (PIF3) GI:3929585 from (Arabidopsis thaliana)	220.04	0.114917	30.0336	0.100027		NS	NS		NS		-5.04635	NS	NS	NS
De-regulated in both	At2g32950	COP1_ATCOP1_DET340_EMB168_FUS1__COP1 regulatory protein, photomorphogenesis repressor; identical to COP1 regulatory protein/FUSCA protein FUS1 GI:402685 SP:P43254	8.87004	0.0609116	2.0063	0.0134187		NS	NS		NS		NS	NS	NS	NS
De-regulated in both	At3g19390	cysteine proteinase, putative / thiol protease, putative, contains similarity to cysteine proteinase RD21A (thiol protease) GI:435619, SP:P43297 from (Arabidopsis thaliana)	6.84177	NS	4.3809	NS		NS	NS		NS		NS	NS	NS	NS
De-regulated in both	At4g10180	DET1_FUS2__light-mediated development protein 1 / deetiolated1 (DET1), identical to Light-mediated development protein DET1 (Deetiolated1) (Swiss-Prot:P48732) (Arabidopsis thaliana)	5.88197	0.202143	5.11016	0.103205		NS	NS		NS		NS	NS	NS	NS
De-regulated in both	At3g45730	expressed protein	2.41032	NS	2.84158	NS		10.6032	NS		NS		NS	NS	NS	NS
De-regulated in both	At5g48240	expressed protein, similar to hypothetical protein [Oryza sativa (japonica cultivar-group)] (GB:AAX96070.1)	2.2346	NS	2.14308	NS		NS	NS		0.586726		NS	NS	NS	NS
De-regulated in both	At5g43500	ATARP9__expressed protein	2.19071	NS	2.44961	NS		NS	NS		NS		NS	NS	NS	NS
De-regulated in both	At3g17070	peroxidase, putative, similar to peroxidase GB:AAD37376 (Glycine max)	0.496105	NS	0.457604	NS		NS	NS		NS		NS	NS	NS	NS
De-regulated in both	At4g02770	photosystem I reaction center subunit II, chloroplast, putative / photosystem I 20 kDa subunit, putative / PSI-D, putative (PSAD1), similar to SP:P12353 Photosystem I reaction center subunit II, chloroplast precursor (Photosystem I 20 kDa subunit) (PSI-D) {Spinacia oleracea}; contains Pfam profile PF02531: PsaD	0.490128	NS	0.460152	NS		0.146205	NS		-1.91582		-12.3198	NS	NS	NS
De-regulated in both	At2g31751	expressed protein	0.478701	NS	0.394003	NS		NS	NS		NS		NS	NS	NS	NS
De-regulated in both	At5g13210	expressed protein	0.442246	NS	3.8323	NS		NS	NS		NS		NS	NS	NS	NS
De-regulated in both	At3g59010	pectinesterase family protein, contains Pfam profile: PF01095 pectinesterase	0.380566	NS	0.210371	NS		NS	NS		NS		NS	NS	NS	NS
De-regulated in both	At5g11260	HY5_TED 5__bZIP protein HY5 (HY5), identical to HY5 protein GI:2251085 from (Arabidopsis thaliana)	0.258583	8.40477	0.489367	8.12082		2.80194	NS		NS		NS	NS	NS	NS
De-regulated in both	At4g34350	ISPH_CLB6__Arabidopsis ISPH is involved in the plastid nonmevalonate pathway of isoprenoid biosynthesis. It was shown to complement the lethal phenotype of E.coli ispH mutant and is therefore most likely encodes a protein with 4-hydroxy-3-methylbut-2-en-1-yl diphosphate reductase activity involved in the last step of mevalonate-independent isopentenyl biosynthesis.	0.242489	10.831	0.332222	9.44087		NS	NS		NS		NS	NS	NS	NS
De-regulated in both	At2g05070	LHCB2.2__chlorophyll A-B binding protein / LHCII type II (LHCB2.2), identical to Lhcb2 protein (Arabidopsis thaliana) GI:4741946; contains Pfam profile PF00504: Chlorophyll A-B binding protein	0.203928	NS	0.165088	NS		NS	NS		-3.66736		-3.65005	NS	NS	NS
De-regulated in both	At5g13630	GUN5_CCH_CCH1_CHLH__magnesium-chelatase subunit chlH, chloroplast, putative / Mg-protoporphyrin IX chelatase, putative (CHLH), nearly identical to magnesium chelatase subunit GI:1154627 from (Arabidopsis thaliana); contains Pfam profile: PF02514 CobN/magnesium chelatase family protein	0.177441	19.4777	0.151724	16.7875		0.333646	NS		-1.75662		-3.30539	NS	NS	NS
De-regulated in both	At1g29930	CAB1_AB140_CAB140_LHCB1.3__chlorophyll A-B binding protein 2, chloroplast / LHCII type I CAB-2 / CAB-140 (CAB2B), identical to SP:P04778 Chlorophyll A-B binding protein 2, chloroplast precursor (LHCII type I CAB-2) (CAB-140) (LHCP) {Arabidopsis thaliana}	0.153001	11.0141	0.171961	12.5845		NS	NS		-4.35091		NS	NS	NS	NS
De-regulated in both	At1g24510	T-complex protein 1 epsilon subunit, putative / TCP-1-epsilon, putative / chaperonin, putative, identical to SWISS-PROT:O04450- T-complex protein 1, epsilon subunit (TCP-1-epsilon) (Arabidopsis thaliana); strong similarity to SP:P54411 T-complex protein 1, epsilon subunit (TCP-1-epsilon) (CCT-epsilon) (TCP-K36) {Avena sativa}; contains Pfam:PF00118 domain, TCP-1/cpn60 chaperonin family	0.105463	7.90767	0.293177	11.981		NS	NS		NS		NS	NS	NS	NS
De-regulated in both	At1g67090	ribulose bisphosphate carboxylase small chain 1A / RuBisCO small subunit 1A (RBCS-1A) (ATS1A), identical to SP:P10795 Ribulose bisphosphate carboxylase small chain 1A, chloroplast precursor (EC 4.1.1.39) (RuBisCO small subunit 1A) {Arabidopsis thaliana}	0.0935193	60.7096	0.103117	66.6899		NS	NS		-1.04146		NS	NS	NS	NS
De-regulated in both	At4g15560	CLA1_CLA_DEF_DXS__1-deoxy-D-xylulose 5-phosphate synthase, putative / 1-deoxyxylulose-5-phosphate synthase, putative / DXP-synthase, putative (DEF) (CLA1), identical to SP:Q38854 Probable 1-deoxy-D-xylulose 5-phosphate synthase, chloroplast precursor (EC 4.1.3.37) (1-deoxyxylulose-5-phosphate synthase) (DXP synthase) (DXPS). (Mouse-ear cress) {Arabidopsis thaliana}, DEF (deficient in photosynthes…	0.0595831	16.2227	0.341067	4.2189		0.418941	NS		-0.974099		NS	NS	NS	NS
De-regulated in ES only	At5g64060	ANAC103__no apical meristem (NAM) family protein, similar to NAC1 (GI:7716952) {Medicago truncatula}; contains Pfam PF02365: No apical meristem (NAM) protein			18.7195	NS
De-regulated in ES only	At4g22960	similar to expressed protein [Arabidopsis thaliana] (TAIR:At4g11860.1); similar to hypothetical protein LOC75007 [Mus musculus] (GB:NP_598619.2); similar to PREDICTED: hypothetical protein XP_524866 [Pan troglodytes] (GB:XP_524866.1); similar to LOC310665 protein [Rattus norvegicus] (GB:AAH91386.1); similar to PREDICTED: similar to hypothetical protein FLJ11280 [Canis familiaris] (GB:XP_540306.1)…			17.0274	NS
De-regulated in ES only	At1g66870	glycosyl hydrolase family protein 17, similar to glucan endo-1,3-beta-glucosidase precursor SP:P52409 from (Triticum aestivum)			12.4934	NS
De-regulated in ES only	At4g28950	ARAC7__Rac-like GTP-binding protein (ARAC7), identical to rac GTP binding protein Arac7 GI:3702962 from (Arabidopsis thaliana)			9.83291	NS
De-regulated in ES only	At5g55135	hypothetical protein			9.65915	NS
De-regulated in ES only	At3g27630	expressed protein			8.94224	NS
De-regulated in ES only	At4g02390	APP__poly (ADP-ribose) polymerase / NAD(+) ADP-ribosyltransferase / poly(ADP-ribose) synthetase (APP), identical to SP:Q11207 Poly (ADP-ribose) polymerase (EC 2.4.2.30) (PARP) (ADPRT) (NAD(+) ADP- ribosyltransferase) (Poly(ADP-ribose) synthetase) {Arabidopsis thaliana}			8.55087	NS
De-regulated in ES only	At2g18193	AAA-type ATPase family protein, contains Pfam profile: ATPase family PF00004			8.14621	NS
De-regulated in ES only	At3g58270	meprin and TRAF homology domain-containing protein / MATH domain-containing protein, similar to ubiquitin-specific protease 12 (Arabidopsis thaliana) GI:11993471; contains Pfam profile PF00917: MATH domain			7.43863	NS
De-regulated in ES only	At1g53990	GLIP3__GDSL-motif lipase/hydrolase family protein, similar to myrosinase-associated proteins from (Brassica napus) GI:1769968 GI:1769970, SP:P40603 Anther-specific proline-rich protein APG {Brassica napus}; contains Pfam profile PF00657: GDSL-like Lipase/Acylhydrolase			7.1113	NS
De-regulated in ES only	At1g29860	WRKY71_ATWRKY71__WRKY family transcription factor, similar to DNA-binding protein 2 GI:4322940 from (Nicotiana tabacum)			5.58753	NS
De-regulated in ES only	At3g61170	pentatricopeptide (PPR) repeat-containing protein, strong similarity to PCMP-H2 (Arabidopsis thaliana) GI:5050911; contains Pfam profile PF01535: PPR repeat			5.27004	NS
De-regulated in ES only	At5g48720	similar to expressed protein [Arabidopsis thaliana] (TAIR:At2g01990.1); similar to P0413C03.27 [Oryza sativa (japonica cultivar-group)] (GB:NP_914850.1)			5.0713	NS
De-regulated in ES only	At3g53220	thioredoxin family protein, low similarity to SP:P29451 Thioredoxin (Rhesus macaque) {Macaca mulatta}; contains Pfam profile: PF00085 Thioredoxin			4.97773	NS
De-regulated in ES only	At1g70440	SRO3__Encodes a protein with similarity to RCD1 but without the WWE domain. The protein does have a PARP signature upstream of the C-terminal protein interaction domain. The PARP signature may bind NAD+ and attach the ADP-ribose-moiety from NAD+ to the target molecule. Its presence suggests a role for the protein in ADP ribosylation.			4.84038	NS
De-regulated in ES only	At3g05905				4.59545	NS
De-regulated in ES only	At3g52115	ATGR1__expressed protein			4.41737	NS
De-regulated in ES only	At3g16650	PP1/PP2A phosphatases pleiotropic regulator 2 (PRL2), identical to SP:Q39190 PP1/PP2A phosphatases pleiotropic regulator PRL2 {Arabidopsis thaliana}, GB:Q39190 from (Arabidopsis thaliana); contains Pfam PF00400: WD domain, G-beta repeat (7 copies, 1 weak)			4.1941	NS
De-regulated in ES only	At3g28210	PMZ__zinc finger (AN1-like) family protein, contains Pfam profile: PF01428 AN1-like zinc finger			4.15267	NS
De-regulated in ES only	At2g21640	expressed protein			4.09996	NS
De-regulated in ES only	At1g30475	expressed protein, similar to expressed protein [Arabidopsis thaliana] (TAIR:At1g56200.1); similar to unknown protein [Oryza sativa (japonica cultivar-group)] (GB:BAD32964.1); contains domain GLY_RICH (PS50315)			4.03293	NS
De-regulated in ES only	At5g03780	TRFL10__expressed protein			3.82816	NS
De-regulated in ES only	At4g39675	expressed protein			3.82718	NS
De-regulated in ES only	At4g39740	electron transport SCO1/SenC family protein, similar to SP:P23833 SCO1 protein, mitochondrial precursor {Saccharomyces cerevisiae}; contains Pfam profile PF02630: SCO1/SenC			3.78839	NS
De-regulated in ES only	At4g21070	ATBRCA1__similar to zinc finger (C3HC4-type RING finger) family protein / BRCT domain-containing protein [Arabidopsis thaliana] (TAIR:At1g04020.2); similar to putative BRCT domain-containing protein [Oryza sativa (japonica cultivar-group)] (GB:AAV59289.1); contains InterPro domain BRCT (InterPro:IPR001357); contains InterPro domain Zn-finger, RING (InterPro:IPR001841)			3.57812	NS
De-regulated in ES only	At1g23550	SRO2__Encodes a protein with similarity to RCD1 but without the WWE domain. The protein does have a PARP signature upstream of the C-terminal protein interaction domain. The PARP signature may bind NAD+ and attach the ADP-ribose-moiety from NAD+ to the target molecule. Its presence suggests a role for the protein in ADP ribosylation.			3.46249	NS
De-regulated in ES only	At4g32870	expressed protein, hypothetical protein F17H15.20 Arabidopsis thaliana chromosome II BAC F17H15, PID:g3643606			3.39374	NS
De-regulated in ES only	At3g27060	ribonucleoside-diphosphate reductase small chain, putative / ribonucleotide reductase, putative, similar to ribonucleotide reductase R2 (Nicotiana tabacum) GI:1044912; contains Pfam profile PF00268: Ribonucleotide reductase, small chain			3.29204	NS
De-regulated in ES only	At3g14770	nodulin MtN3 family protein, similar to MtN3 GI:1619602 (root nodule development) from (Medicago truncatula)			3.27032	NS
De-regulated in ES only	At3g21530	endonuclease/exonuclease/phosphatase family protein, contains Pfam profile PF03372: Endonuclease/Exonuclease/phosphatase family			3.26023	NS
De-regulated in ES only	At1g13330	expressed protein, similar to nuclear receptor coactivator GT198 (GI:16506273) {Rattus norvegicus}; similar to TBP-1 interacting protein (GI:7328534) (Homo sapiens)			3.12076	NS
De-regulated in ES only	At3g53200	myb family transcription factor (MYB27), similar to myb-related DNA-binding protein GI:6467223 from (Arabidopsis thaliana); contains PFAM profile: myb DNA binding domain PF00249			3.03737	NS
De-regulated in ES only	At3g07800	thymidine kinase, putative, similar to thymidine kinase (Oryza sativa) SWISS-PROT:O81263			2.97233	NS
De-regulated in ES only	At1g29030	apoptosis inhibitory 5 (API5) family protein, contains Pfam profile PF05918: Apoptosis inhibitory protein 5 (API5)			2.84434	NS
De-regulated in ES only	At5g40840	SYN2__cohesion family protein SYN2 (SYN2), identical to cohesion family protein SYN2 (Arabidopsis thaliana) GI:12006360; supporting cDNA gi:12006359:gb:AF281154.1:AF281154			2.84183	NS
De-regulated in ES only	At2g20560	DNAJ heat shock family protein, SP:Q9UDY4 DnaJ homolog subfamily B member 4 (Heat shock 40 kDa protein 1 homolog) {Homo sapiens}; contains Pfam profile PF00226: DnaJ domain			2.76578	NS
De-regulated in ES only	At4g26780	AR192__co-chaperone grpE family protein, similar to chaperone GrpE type 2 (Nicotiana tabacum) GI:3851640; contains Pfam profile PF01025: co-chaperone GrpE			2.73414	NS
De-regulated in ES only	At5g46780	VQ motif-containing protein, contains PF05678: VQ motif			2.73126	NS
De-regulated in ES only	At1g60640	expressed protein			2.72512	NS
De-regulated in ES only	At1g75670	expressed protein, similar to DNA-dependent RNA polymerase 19 kDa polypeptide (EC 2.7.7.6) (A43) (Swiss-Prot:O43036) (Schizosaccharomyces pombe)			2.66577	NS
De-regulated in ES only	At5g65530	protein kinase, putative, contains protein kinase domain, Pfam:PF00069			2.61949	NS
De-regulated in ES only	At5g17270	tetratricopeptide repeat (TPR)-containing protein, contains Pfam profile PF00515 TPR Domain			2.33143	NS
De-regulated in ES only	At5g02490	heat shock cognate 70 kDa protein 2 (HSC70-2) (HSP70-2), identical to SP:P22954 Heat shock cognate 70 kDa protein 2 (Hsc70.2) {Arabidopsis thaliana}			2.32003	NS
De-regulated in ES only	At4g23570	SGT1A_SGT1B__phosphatase-related, low similarity to phosphoprotein phosphatase (Mus musculus) GI:567040; contains Pfam profiles PF00515: TPR Domain, PF05002: SGS domain, PF04969: CS domain			2.28424	NS
De-regulated in ES only	At4g28510	ATPHB1__prohibitin, putative, similar to SP:P24142 Prohibitin (B-cell receptor associated protein 32) (BAP 32) {Rattus norvegicus}; contains Pfam profile PF01145: SPFH domain / Band 7 family			2.28105	NS
De-regulated in ES only	At5g39840	ATP-dependent RNA helicase, mitochondrial, putative, similar to mitochondrial RNA helicase (Arabidopsis thaliana) GI:5823579; contains Pfam profile PF00271: Helicase conserved C-terminal domain			2.2768	NS
De-regulated in ES only	At5g48030	GFA2__DNAJ heat shock protein, mitochondrially targeted (GFA2), 99.8% identical to mitochondrially targeted DnaJ protein GFA2 (Arabidopsis thaliana) GI:21429604; contains Pfam profiles PF00226: DnaJ domain, PF01556: DnaJ C terminal region, PF00684: DnaJ central domain (4 repeats)			2.26779	NS
De-regulated in ES only	At1g12650	expressed protein, similar to KED (GI:8096269) (Nicotiana tabacum); similar to rRNA processing protein EBP2 (SP:P36049) (Saccharomyces cerevisiae)			2.24757	NS
De-regulated in ES only	At4g20090	EMB1025__pentatricopeptide (PPR) repeat-containing protein, contains Pfam profile PF01535: PPR repeat			2.19522	NS
De-regulated in ES only	At1g79150	expressed protein, ; expression supported by MPSS			2.17929	NS
De-regulated in ES only	At1g31280	AGO2__PAZ domain-containing protein / piwi domain-containing protein, similar to SP:O04379 Argonaute protein (AGO1) {Arabidopsis thaliana}, SP:Q9XGW1 PINHEAD protein (ZWILLE protein) {Arabidopsis thaliana}; contains Pfam profiles PF02171: Piwi domain, PF02170: PAZ domain			2.16695	NS
De-regulated in ES only	At2g30250	WRKY25_ATWRKY25__WRKY family transcription factor			2.03069	NS
De-regulated in ES only	At2g32560	F-box family protein, contains Pfam PF00646: F-box domain; similar to SKP1 interacting partner 2 (SKIP2) TIGR_Ath1:At5g67250			0.494677	NS
De-regulated in ES only	At3g61700	expressed protein			0.490774	NS
De-regulated in ES only	At2g20260	photosystem I reaction center subunit IV, chloroplast, putative / PSI-E, putative (PSAE2), identical to SP:Q9S714; similar to SP:P12354 Photosystem I reaction center subunit IV, chloroplast precursor (PSI-E) {Spinacia oleracea}; contains Pfam profile PF02427: Photosystem I reaction centre subunit IV / PsaE			0.48568	NS
De-regulated in ES only	At3g61470	LHCA2__chlorophyll A-B binding protein (LHCA2), identical to Lhca2 protein (Arabidopsis thaliana) GI:4741940; similar to chlorophyll A-B binding protein, chloroplast (Precursor) SP:P13869 from (Petunia hybrida); contains Pfam profile: PF00504 chlorophyll A-B binding protein			0.484998	NS
De-regulated in ES only	At1g70890	major latex protein-related / MLP-related, low similarity to major latex protein {Papaver somniferum}(GI:294062) ; contains Pfam profile PF00407: Pathogenesis-related protein Bet v I family			0.479549	NS
De-regulated in ES only	At3g62750	similar to glycosyl hydrolase family 1 protein [Arabidopsis thaliana] (TAIR:At4g22100.1); similar to glycosyl hydrolase family 1 protein [Arabidopsis thaliana] (TAIR:At4g27830.1); similar to glycosyl hydrolase family 1 protein [Arabidopsis thaliana] (TAIR:At3g62740.1); similar to glycosyl hydrolase family 1 protein [Arabidopsis thaliana] (TAIR:At4g27820.1); similar to hydroxyisourate hydrolase [G…			0.479099	NS
De-regulated in ES only	At1g29025				0.478809	NS
De-regulated in ES only	At4g30170	peroxidase, putative, identical to peroxidase ATP8a (Arabidopsis thaliana) gi:1546706:emb:CAA67361			0.473484	NS
De-regulated in ES only	At5g13870	EXGT-A4__xyloglucan:xyloglucosyl transferase / xyloglucan endotransglycosylase / endo-xyloglucan transferase (EXGT-A4), identical to endoxyloglucan transferase EXGT-A4 GI:5533315 from (Arabidopsis thaliana)			0.470725	NS
De-regulated in ES only	At5g66460	(1-4)-beta-mannan endohydrolase, putative, similar to (1-4)-beta-mannan endohydrolase (Coffea arabica) GI:10178872; contains Pfam profile PF00150: Cellulase (glycosyl hydrolase family 5)			0.461538	NS
De-regulated in ES only	At1g32060	phosphoribulokinase (PRK) / phosphopentokinase, nearly identical to SP:P25697 Phosphoribulokinase, chloroplast precursor (EC 2.7.1.19) (Phosphopentokinase) (PRKASE) (PRK) {Arabidopsis thaliana}			0.461063	NS
De-regulated in ES only	At3g29320	glucan phosphorylase, putative, similar to alpha-glucan phosphorylase, L isozyme 1 precursor GB:P04045 from (Solanum tuberosum) (J. Biochem. 106 (4), 691-695 (1989))			0.460886	NS
De-regulated in ES only	At2g39450	cation efflux family protein, contains cation efflux family protein domain, Pfam:PF01545			0.458765	0.580098
De-regulated in ES only	At2g35260	expressed protein			0.445327	NS
De-regulated in ES only	At1g10760	SEX1_GWD_GWD1_SOP_SOP1__starch excess protein (SEX1), identical to SEX1 (Arabidopsis thaliana) GI:12044358; supporting cDNA gi:12044357:gb:AF312027.1:AF312027			0.443785	NS
De-regulated in ES only	At5g58330	malate dehydrogenase (NADP), chloroplast, putative, strong similiarity to chloroplast NADP-dependent malate dehydrogenase (EC 1.1.1.82) SP:O48902 {Medicago sativa}, SP:P21528 {Pisum sativum}, SP:Q05145 {Mesembryanthemum crystallinum}, SP:P46489 {Flaveria bidentis}, (Flaveria trinervia) GI:726334, SP:P17606I {Sorghum bicolor}; contains InterPro entry IPR001236: Lactate/malate dehydrogenase			0.439801	NS
De-regulated in ES only	At5g66570	PSBO-1_OE33_OEE1_OEE33_PSBO1__Encodes a protein which is an extrinsic subunit of photosystem II and which has been proposed to play a central role in stabilization of the catalytic manganese cluster. In Arabidopsis thaliana the PsbO proteins are encoded by two genes: psbO1 and psbO2. PsbO1 is the major isoform in the wild-type.			0.437126	NS
De-regulated in ES only	At1g52910	expressed protein			0.435989	NS
De-regulated in ES only	At4g38330	expressed protein			0.435865	NS
De-regulated in ES only	At1g35420	dienelactone hydrolase family protein, low similarity to dienelactone hydrolase (Rhodococcus opacus) GI:23094407; contains Pfam profile PF01738: Dienelactone hydrolase family			0.425427	NS
De-regulated in ES only	At1g14600	similar to calcium-dependent protein kinase-related / CDPK-related [Arabidopsis thaliana] (TAIR:At2g02060.1); similar to Unknown protein [Oryza sativa (japonica cultivar-group)] (GB:XP_468596.1); contains InterPro domain Myb DNA-binding domain (InterPro:IPR001005); contains InterPro domain Myb-like DNA-binding domain, SHAQKYF class (InterPro:IPR006447)			0.409885	NS
De-regulated in ES only	At3g08940	LHCB4.2__chlorophyll A-B binding protein (LHCB4.2), contains Pfam profile: PF00504 chlorophyll A-B binding protein; identical to Lhcb4.2 protein GB:AAD28774 (Arabidopsis thaliana)			0.395083	NS
De-regulated in ES only	At5g35630	GS2_ATGSL1_GLN2__glutamine synthetase (GS2), identical to glutamine synthetase, chloroplast precursor (glutamate-- ammonia ligase, GS2) (Arabidopsis thaliana) SWISS-PROT:Q43127			0.393209	NS
De-regulated in ES only	At4g37580	COP3_HLS1_COP3__N-acetyltransferase, putative / hookless1 (HLS1), contains Pfam profile PF00583: acetyltransferase, GNAT family; identical to cDNA putative N-acetyltransferase hookless1 (HLS1) GI:1277089			0.392974	NS
De-regulated in ES only	At3g46970	ATPHS2_PHS2__Encodes a cytosolic alpha-glucan phosphorylase.			0.387901	NS
De-regulated in ES only	At4g15490	UDP-glucoronosyl/UDP-glucosyl transferase family protein, contains Pfam profile: PF00201 UDP-glucoronosyl and UDP-glucosyl transferase ;simalr to UDP-glucose:sinapate glucosyltransferase GI:9794913 from (Brassica napus)			0.385349	NS
De-regulated in ES only	At1g09540	MYB61_ATMYB61__myb family transcription factor (MYB61), contains PFAM profile: myb DNA-binding domain PF00249			0.369507	NS
De-regulated in ES only	At3g57010	strictosidine synthase family protein, similar to strictosidine synthase (Rauvolfia serpentina)(SP:P15324)			0.353083	NS
De-regulated in ES only	At5g67020	expressed protein			0.351879	NS
De-regulated in ES only	At5g23220	isochorismatase hydrolase family protein, low similarity to SP:P45743Isochorismatase (EC 3.3.2.1) (2,3 dihydro-2,3 dihydroxybenzoate synthase) (Superoxide-inducible protein) (SOI1) {Bacillus subtilis}; contains Pfam profile PF00857: isochorismatase family protein			0.344627	NS
De-regulated in ES only	At5g60760	2-phosphoglycerate kinase-related, contains weak similarity to 2-phosphoglycerate kinase (GI:467751) (Methanothermus fervidus)			0.322896	NS
De-regulated in ES only	At1g75710	zinc finger (C2H2 type) family protein, contains zinc finger, C2H2 type, domain, PROSITE:PS00028			0.318025	NS
De-regulated in ES only	At2g16740	ubiquitin-conjugating enzyme, putative, strong similarity to SP:P35133 Ubiquitin-conjugating enzyme E2-17 kDa 10 (EC 6.3.2.19) (Ubiquitin- protein ligase 10) (Ubiquitin carrier protein 10) {Arabidopsis thaliana}; contains Pfam profile PF00179: Ubiquitin-conjugating enzyme			0.316304	0.518016
De-regulated in ES only	At3g01510	5`-AMP-activated protein kinase beta-1 subunit-related, contains similarity to Swiss-Prot:P80387 5`-AMP-activated protein kinase, beta-1 subunit (AMPK beta-1 chain) (AMPKb) (40 kDa subunit) (Sus scrofa)			0.313607	NS
De-regulated in ES only	At2g26695	similar to zinc finger (Ran-binding) family protein [Arabidopsis thaliana] (TAIR:At3g15680.1); similar to putative zinc finger transcription factor ZFP30 [Oryza sativa (japonica cultivar-group)] (GB:XP_493723.1); similar to zinc finger transcription factor ZFP30 [Oryza sativa (japonica cultivar-group)] (GB:XP_464544.1); contains InterPro domain Zn-finger, Ran-binding (InterPro:IPR001876)			0.306081	NS
De-regulated in ES only	At5g44440	FAD-binding domain-containing protein, similar to SP:P30986 reticuline oxidase precursor (Berberine-bridge-forming enzyme) (BBE) (Tetrahydroprotoberberine synthase) (Eschscholzia californica); contains PF01565 FAD binding domain			0.303417	NS
De-regulated in ES only	At2g34420	LHB1B2_LHCB1.5__chlorophyll A-B binding protein / LHCII type I (LHB1B2), identical to GB:X64460 photosystem II type I chlorophyll a/b binding protein (Arabidopsis thaliana) GI:16364			0.293507	NS
De-regulated in ES only	At4g12510	protease inhibitor/seed storage/lipid transfer protein (LTP) family protein, similar to 14 kDa polypeptide (Catharanthus roseus) GI:407410; contains Pfam protease inhibitor/seed storage/LTP family domain PF00234			0.287078	NS
De-regulated in ES only	At2g40250	GDSL-motif lipase/hydrolase family protein, similar to family II lipases EXL3 GI:15054386, EXL1 GI:15054382, EXL2 GI:15054384 from (Arabidopsis thaliana); contains Pfam profile PF00657: GDSL-like Lipase/Acylhydrolase			0.277516	NS
De-regulated in ES only	At1g60450	galactinol synthase, putative, similar to galactinol synthase GI:5608497 from (Ajuga reptans); contains Pfam profile: PF01501 glycosyl transferase family 8			0.261771	NS
De-regulated in ES only	At4g37410	CYP81F4__cytochrome P450, putative, similar to cytochrome p450 SP:O65790 from (Arabidopsis thaliana)			0.259842	NS
De-regulated in ES only	At1g01390	UDP-glucoronosyl/UDP-glucosyl transferase family protein, contains Pfam profile: PF00201 UDP-glucoronosyl and UDP-glucosyl transferase			0.257548	NS
De-regulated in ES only	At1g35250	thioesterase family protein, contains Pfam profile PF03061: thioesterase family protein			0.25574	NS
De-regulated in ES only	At2g36792				0.247632	NS
De-regulated in ES only	At1g03120	ATRAB28__seed maturation family protein, similar to embryonic cell protein (Daucus carota) GI:18337; contains Pfam profile PF04927: Seed maturation protein			0.242968	NS
De-regulated in ES only	At1g11450	nodulin MtN21 family protein, similar to GI:2598575 MtN21 (GI:2598575) {Medicago truncatula}			0.236965	NS
De-regulated in ES only	At1g61270	lysine and histidine specific transporter, putative, similar to lysine and histidine specific transporter GI:2576361 from (Arabidopsis thaliana); contains Pfam profile PF01490: Transmembrane amino acid transporter protein			0.226759	NS
De-regulated in ES only	At5g44580	expressed protein			0.215667	NS
De-regulated in ES only	At2g32610	ATCSLB01_ATCSLB1_CSLB01_ATCSLB03_ATCSLB3_CSLB03__cellulose synthase family protein, similar to Zea mays cellulose synthase-3 (gi:9622878), -2 (gi:9622876), -1 (gi:9622874)			0.209468	NS
De-regulated in ES only	At1g68725	AGP19_ATAGP19__AGP19 is a lysine-rich arabinogalactan-protein (AGP) and part of a multi-gene family of glycoproteins with approx. 50 members. It falls into one subclass with AGP17 and AGP18, other lysine-rich AGPs. It is expressed in young leaves, shoots, roots and flowers. Non-consensus splice site at the intron:exon boundary (AT:exon)			0.200218	NS
De-regulated in ES only	At1g65310	ATXTH17__putative xyloglucan endotransglycosylase/hydrolase, expressed in the mature or basal regions of both the main and lateral roots, but not in the tip of these roots where cell division occurs.			0.191339	NS
De-regulated in ES only	At2g29130	LAC2__laccase, putative / diphenol oxidase, putative, similar to laccase (Liriodendron tulipifera)(GI:1621467)			0.177441	NS
De-regulated in ES only	At5g42500	disease resistance-responsive family protein, similar to disease resistance response protein 206-d (Pisum sativum) gi:508844:gb:AAB18669			0.155474	NS
De-regulated in ES only	At3g25830	ATTPS-CIN__Encodes the monoterpene 1,8-cineole synthase, atTPS-Cin. This polypeptide was also shown to synthesize other monoterpenes albeit in minor quantities. The same polypeptide is encoded at two different loci, the result of gene duplication: at3g25820 and at3g25830.			0.147758	NS
De-regulated in ES only	At5g21100	L-ascorbate oxidase, putative, similar to L-ascorbate oxidase (Precursor) SP:Q40588 from (Nicotiana tabacum)			0.141243	NS
De-regulated in ES only	At2g16970	expressed protein, ; expression supported by MPSS			0.13368	NS
De-regulated in ES only	At3g27690	LHCB2:4_LHCB2.3__chlorophyll A-B binding protein (LHCB2:4), nearly identical to Lhcb2 protein (Arabidopsis thaliana) GI:4741950; similar to chlorophyll A-B binding protein 151 precursor (LHCP) GB:P27518 from (Gossypium hirsutum); contains Pfam PF00504: Chlorophyll A-B binding protein			0.132009	NS
De-regulated in ES only	At5g66690	UGT72E2 is an UDPG:coniferyl alcohol glucosyltransferase which glucosylates sinapyl- and coniferyl aldehydes as well as sinapyl- and coniferyl alcohol. The enzyme is thought to be involved in lignin metabolism.			0.130581	NS
De-regulated in ES only	At3g44570	hypothetical protein			0.122711	NS
De-regulated in ES only	At2g25160	CYP82F1__cytochrome P450, putative, similar to cytochrome p450(CYP82C1p) GI:2739004 from (Glycine max)			0.115879	NS
De-regulated in ES only	At5g46900	protease inhibitor/seed storage/lipid transfer protein (LTP) family protein, contains Pfam protease inhibitor/seed storage/LTP family domain PF00234			0.102031	NS
De-regulated in ES only	At1g18140	LAC1__laccase family protein / diphenol oxidase family protein, similar to high-pI laccase (LAC2-1) GI:1621460 from (Liriodendron tulipifera)			0.0958614	NS
De-regulated in ES only	At1g43780	SCPL44__serine carboxypeptidase S10 family protein, similar to serine carboxylase II-3 GB:CAA55478 GI:474392 from (Hordeum vulgare)			0.0921698	NS
De-regulated in ES only	At4g33790	acyl CoA reductase, putative, similar to acyl CoA reductase (Simmondsia chinensis) GI:5020215; contains Pfam profile PF03015: Male sterility protein; No start codon identified, may contain anomalous splicing at 5` end.			0.0746575	NS
De-regulated in ES only	AtCg00210	YCF6__hypothetical protein			0.0720959	NS
De-regulated in ES only	AtCg01000	YCF1.1__hypothetical protein			0.029087	NS
De-regulated in ES only	At5g04120	phosphoglycerate/bisphosphoglycerate mutase family protein, low similarity to SP:P36623 Phosphoglycerate mutase (EC 5.4.2.1) {Schizosaccharomyces pombe}; contains Pfam profile PF00300: phosphoglycerate mutase family			0.0238748	NS
De-regulated in ES only	AtCg00290				0.0170182	NS
De-regulated in ES only	AtCg01300	RPL23.2__One of two chloroplast genes that encode chloroplast ribosomal protein L23, a constituent of the large subunit of the ribosomal complex			0.0150774	NS
De-regulated in ES only	AtCg00300	YCF9__encodes PsbZ, which is a subunit of photosystem II. In Chlamydomonas, this protein has been shown to be essential in the interaction between PS II and the light harvesting complex II.
De-regulated in leaves only	At4g25580	stress-responsive protein-related, contains weak similarity to Low-temperature-induced 65 kDa protein (Desiccation-responsive protein 29B) (Swiss-Prot:Q04980) (Arabidopsis thaliana)	96.4085	NS
De-regulated in leaves only	At4g26260	MIOX4__expressed protein, similar to myo-inositol oxygenase (Sus scrofa) gi:17432544:gb:AAL39076	86.4825	0.1502
De-regulated in leaves only	At3g59930	Encodes a defensin-like (DEFL) family protein.	63.1462	NS
De-regulated in leaves only	At5g23700	expressed protein	35.2567	NS
De-regulated in leaves only	At1g15380	lactoylglutathione lyase family protein / glyoxalase I family protein, contains glyoxalase family protein domain, Pfam:PF00903	30.8983	NS
De-regulated in leaves only	At4g34410	encodes a member of the ERF (ethylene response factor) subfamily B-3 of ERF/AP2 transcription factor family. The protein contains one AP2 domain. There are 18 members in this subfamily including ATERF-1, ATERF-2, AND ATERF-5.	30.5376	NS
De-regulated in leaves only	At3g25190	nodulin, putative, similar to nodulin 21 (N-21) (Glycine max) SWISS-PROT:P16313	29.1124	NS
De-regulated in leaves only	At1g12610	DDF1__encodes a member of the DREB subfamily A-1 of ERF/AP2 transcription factor family (DDF1). The protein contains one AP2 domain. There are six members in this subfamily, including CBF1, CBF2, and CBF3. Overexpression of this gene results in delayed flowering and dwarfism, reduction of gibberellic acid biosynthesis, and increased tolerance to high levels of salt. This gene is expressed in all …	27.4088	NS
De-regulated in leaves only	At3g56790	RNA splicing factor-related, contains weak similarity to U4/U6-associated RNA splicing factor (Homo sapiens) gi:2853287:gb:AAC09069	24.8714	NS
De-regulated in leaves only	At2g46740	FAD-binding domain-containing protein, strong similarity to At1g32300, At5g56490, At2g46750, At2g46760; contains PF01565: FAD binding domain	23.9198	NS
De-regulated in leaves only	At3g49620	DIN11__2-oxoacid-dependent oxidase, putative (DIN11), identical to partial cds of 2-oxoacid-dependent oxidase (din11) from GI:10834554 (Arabidopsis thaliana); identical to cDNA 2-oxoacid-dependent oxidase (din11) GI:10834553; contains Pfam profile PF03171: oxidoreductase, 2OG-Fe(II) oxygenase family	23.235	NS
De-regulated in leaves only	At1g15040	glutamine amidotransferase-related	21.6969	NS
De-regulated in leaves only	At5g51990	CBF4__encodes a member of the DREB subfamily A-1 of ERF/AP2 transcription factor family (CBF4). The protein contains one AP2 domain. There are six members in this subfamily, including CBF1, CBF2, and CBF3. This gene is involved in response to drought stress and abscisic acid treatment, but not to low temperature.	18.6057	NS
De-regulated in leaves only	At3g02840	immediate-early fungal elicitor family protein, similar to immediate-early fungal elicitor protein CMPG1 (GI:14582200) (Petroselinum crispum)	18.5822	NS
De-regulated in leaves only	At5g45630	expressed protein, contains Pfam profile PF04520: Protein of unknown function, DUF584	18.3463	NS
De-regulated in leaves only	At1g19530	expressed protein	17.547	NS
De-regulated in leaves only	At5g39150	germin-like protein, putative, similar to germin -like protein GLP6, Arabidopsis thaliana, EMBL:ATU75194 (SP:P92997); contains PS00725 Germin family signature	16.6082	NS
De-regulated in leaves only	At3g49130	expressed protein	16.5947	NS
De-regulated in leaves only	At3g48520	CYP94B3__cytochrome P450 family protein, similar to Cytochrome P450 94A1 (P450-dependent fatty acid omega-hydroxylase) (SP:O81117) {Vicia sativa}; contains Pfam profile: PF00067 cytochrome P450	15.3016	NS
De-regulated in leaves only	At5g21960	encodes a member of the DREB subfamily A-5 of ERF/AP2 transcription factor family. The protein contains one AP2 domain. There are 15 members in this subfamily including RAP2.1, RAP2.9 and RAP2.10.	15.0996	NS
De-regulated in leaves only	At1g08630	L-allo-threonine aldolase-related, similar to L-allo-threonine aldolase (EC 4.1.2.-) (L-allo-TA) (L-allo-threonine acetaldehyde-lyase) (SP:O07051) {Aeromonas jandaei}; similar to ESTs gb:R30517, gb:T42772, gb:R90493, and gb:R90493	14.4326	NS
De-regulated in leaves only	At4g25490	CBF1_DREB1B__Transcriptional activator that binds to the DRE/CRT regulatory element and induces COR (cold-regulated) gene expression increasing plant freezing tolerance. It encodes a member of the DREB subfamily A-1 of ERF/AP2 transcription factor family (CBF1). The protein contains one AP2 domain. There are six members in this subfamily, including CBF1, CBF2, and CBF3. This gene is involved in r…	14.1162	4.22951
De-regulated in leaves only	At4g29780	expressed protein	13.9556	NS
De-regulated in leaves only	At1g62500	protease inhibitor/seed storage/lipid transfer protein (LTP) family protein, similar to auxin down regulated GB:X69640 GI:296442 from (Glycine max); contains Pfam profile PF00234: Protease inhibitor/seed storage/LTP family	13.3157	NS
De-regulated in leaves only	At1g19210	encodes a member of the DREB subfamily A-5 of ERF/AP2 transcription factor family. The protein contains one AP2 domain. There are 15 members in this subfamily including RAP2.1, RAP2.9 and RAP2.10.	13.0944	NS
De-regulated in leaves only	At2g38600	acid phosphatase class B family protein, similar to acid phosphatase (Glycine max) GI:3341443; contains Pfam profile PF03767: HAD superfamily (subfamily IIIB) phosphatase	12.1255	NS
De-regulated in leaves only	At1g74930	encodes a member of the DREB subfamily A-5 of ERF/AP2 transcription factor family. The protein contains one AP2 domain. There are 15 members in this subfamily including RAP2.1, RAP2.9 and RAP2.10.	11.9362	NS
De-regulated in leaves only	At4g15680	glutaredoxin family protein, contains INTERPRO Domain IPR002109, Glutaredoxin (thioltransferase)	11.7395	NS
De-regulated in leaves only	At1g30720	FAD-binding domain-containing protein, similar to SP:P30986 reticuline oxidase precursor (Berberine-bridge-forming enzyme) (BBE) (Tetrahydroprotoberberine synthase) (Eschscholzia californica); contains PF01565 FAD binding domain	10.9432	NS
De-regulated in leaves only	At4g16160	mitochondrial import inner membrane translocase subunit Tim17/Tim22/Tim23 family protein, contains Pfam PF02466: Mitochondrial import inner membrane translocase subunit Tim17	10.6728	NS
De-regulated in leaves only	At1g10070	branched-chain amino acid aminotransferase 2 / branched-chain amino acid transaminase 2 (BCAT2), identical to SP:Q9M439 Branched-chain amino acid aminotransferase 2, chloroplast precursor (EC 2.6.1.42) (Atbcat-2) {Arabidopsis thaliana}; contains Pfam profile: PF01063 aminotransferase class IV	10.6249	0.174137
De-regulated in leaves only	At5g59820	RHL41_ZAT12__zinc finger (C2H2 type) family protein (ZAT12), identical to zinc finger protein ZAT12 (Arabidopsis thaliana) gi:1418325:emb:CAA67232	10.4308	NS
De-regulated in leaves only	At1g33760	encodes a member of the DREB subfamily A-4 of ERF/AP2 transcription factor family. The protein contains one AP2 domain. There are 17 members in this subfamily including TINY.	9.90218	NS
De-regulated in leaves only	At3g61190	BAP1__BON1-associated protein 1 (BAP1), identical to BON1-associated protein 1 (Arabidopsis thaliana) GI:15487384; contains Pfam profile PF00168: C2 domain; supporting cDNA gi:15487383:gb:AY045765.1:	9.87253	NS
De-regulated in leaves only	At5g17350	expressed protein	9.66614	NS
De-regulated in leaves only	At5g37260	myb family transcription factor, contains Pfam profile: PF00249 myb-like DNA-binding domain	9.57781	NS
De-regulated in leaves only	At2g45360	expressed protein	9.28116	NS
De-regulated in leaves only	At2g17660	nitrate-responsive NOI protein, putative, similar to nitrate-induced NOI protein (Zea mays) GI:2642213	9.0064	NS
De-regulated in leaves only	At4g27654	expressed protein	8.99925	NS
De-regulated in leaves only	At1g30730	FAD-binding domain-containing protein, similar to SP:P30986 reticuline oxidase precursor (Berberine-bridge-forming enzyme) (BBE) (Tetrahydroprotoberberine synthase) (Eschscholzia californica); contains PF01565 FAD binding domain	8.71643	NS
De-regulated in leaves only	At4g11280	ACS6__1-aminocyclopropane-1-carboxylate synthase 6 / ACC synthase 6 (ACS6), identical to GI:3746125	8.70324	2.29664
De-regulated in leaves only	At4g13395		8.53871	NS
De-regulated in leaves only	At3g61198		8.51639	NS
De-regulated in leaves only	At4g35770	SEN1_SENESCENCE ASSOCIATED GENE 1_SEN1_ATSEN1_DIN1__senescence-associated protein (SEN1), identical to senescence-associated protein GI:1046270 from (Arabidopsis thaliana)	8.12339	NS
De-regulated in leaves only	At1g15330	CBS domain-containing protein, low similarity to SP:Q9MYP4 5`-AMP-activated protein kinase, gamma-3 subunit (AMPK gamma-3 chain) (AMPK gamma3) {Sus scrofa}; contains Pfam profile PF00571: CBS domain	8.016	0.175968
De-regulated in leaves only	At1g73066		7.9982	NS
De-regulated in leaves only	At4g28040	nodulin MtN21 family protein, similar to MtN21 GI:2598575 (root nodule development) from (Medicago truncatula)	7.92944	NS
De-regulated in leaves only	At5g43620	S-locus protein-related, contains some similarity to S-locus protein 4 GI:6069478 from (Brassica rapa)	7.83244	NS
De-regulated in leaves only	At5g56970	CKX3_ATCKX3__FAD-binding domain-containing protein / cytokinin oxidase family protein, similar to cytokinin oxidase from Zea mays (gi:3882018) (gi:3341978)	7.81036	NS
De-regulated in leaves only	At2g26010	PDF1.3__plant defensin-fusion protein, putative (PDF1.3), plant defensin protein family member, personal communication, Bart Thomma (Bart.Thomma@agr.kuleuven.ac.be); similar to antifungal protein 1 preprotein (Raphanus sativus) gi:609322:gb:AAA69541	7.76539	0.176959
De-regulated in leaves only	At1g66500	zinc finger (C2H2-type) family protein, contains Prosite PS00028: Zinc finger, C2H2 type, domain; similar to S-locus protein 4 (GI:6069478) (Brassica rapa); similar to Pre-mRNA cleavage complex II protein Pcf11 (Fragment) (Swiss-Prot:O94913) (Homo sapiens)	7.68465	NS
De-regulated in leaves only	At3g32980	peroxidase 32 (PER32) (P32) (PRXR3), identical to SP:Q9LHB9 Peroxidase 32 precursor (EC 1.11.1.7) (Atperox P32) (PRXR3) (ATP16a) {Arabidopsis thaliana}	7.67197	2.96172
De-regulated in leaves only	At1g20310	expressed protein	7.35561	NS
De-regulated in leaves only	At1g19540	isoflavone reductase, putative, similar to SP:P52577; contains isoflavone reductase domain PF02716	7.2885	NS
De-regulated in leaves only	At2g27080	harpin-induced protein-related / HIN1-related / harpin-responsive protein-related, contains 1 transmembrane domain; similar to hin1 homolog (GI:13122296) (Arabidopsis thaliana); similar to hin1 (GI:22830759) (Nicotiana tabacum)	7.20805	2.49555
De-regulated in leaves only	At1g63030	DDF2__encodes a member of the DREB subfamily A-1 of ERF/AP2 transcription factor family (DDF2). The protein contains one AP2 domain. There are six members in this subfamily, including CBF1, CBF2, and CBF3. Overexpression of this gene results in the reduction of gibberellic acid biosynthesis. This gene is expressed in all tissues examined, but most abundantly expressed in rosette leaves and stems.…	7.0951	NS
De-regulated in leaves only	At1g18300	ATNUDT4__MutT/nudix family protein, similar to SP:Q09790 Diadenosine 5`,5```-P1,P6-hexaphosphate hydrolase (EC 3.6.1.-) (Ap6A hydrolase) {Schizosaccharomyces pombe}; contains Pfam profile PF00293: NUDIX domain	7.06565	NS
De-regulated in leaves only	At4g15670	glutaredoxin family protein, contains INTERPRO Domain IPR002109, Glutaredoxin (thioltransferase)	7.01694	NS
De-regulated in leaves only	At3g10930	expressed protein	6.98178	NS
De-regulated in leaves only	At2g44790	UCC2__uclacyanin II, strong similarity to uclacyanin II GI:3399769 from (Arabidopsis thaliana); contains Pfam profile PF02298: Plastocyanin-like domain; identical to cDNA uclacyanin II GI:3399768	6.96407	NS
De-regulated in leaves only	At1g73540	ATNUDT21__MutT/nudix family protein, low similarity to SP:Q09790 Diadenosine 5`,5```-P1,P6-hexaphosphate hydrolase (EC 3.6.1.-) (Ap6A hydrolase) {Schizosaccharomyces pombe}; contains Pfam profile PF00293: NUDIX domain	6.83232	NS
De-regulated in leaves only	At3g48390	MA3 domain-containing protein, similar to programmed cell death 4 protein (Gallus gallus) GI:12958564; contains Pfam profile PF02847: MA3 domain	6.79818	2.72573
De-regulated in leaves only	At1g18280	protease inhibitor/seed storage/lipid transfer protein (LTP) family protein, similar to lipid transfer protein GI:2627141 from (Picea abies); contains Pfam profile PF00234 Protease inhibitor/seed storage/LTP family	6.62595	NS
De-regulated in leaves only	At5g14470	GHMP kinase-related, contains similarity to D-glycero-D-manno-heptose 7-phosphate kinase (Aneurinibacillus thermoaerophilus) gi:13491143:gb:AAK27850	6.40945	NS
De-regulated in leaves only	At4g16690	esterase/lipase/thioesterase family protein, similar to ethylene-induced esterase (Citrus sinensis) GI:14279437, polyneuridine aldehyde esterase (Rauvolfia serpentina) GI:6651393, SP:Q40708 PIR7A protein {Oryza sativa}; contains Interpro entry IPR000379	6.40462	NS
De-regulated in leaves only	At5g15720	GLIP7__GDSL-motif lipase/hydrolase family protein, similar to family II lipase EXL3 (GI:15054386) and EXL2 (GI:15054384) (Arabidopsis thaliana); contains Pfam profile PF00657: Lipase/Acylhydrolase with GDSL-like motif	6.26523	NS
De-regulated in leaves only	At4g24050	short-chain dehydrogenase/reductase (SDR) family protein, contains INTERPRO family IPR002198 Short-chain dehydrogenase/reductase (SDR) superfamily	5.98418	NS
De-regulated in leaves only	At1g11080	SCPL31__serine carboxypeptidase S10 family protein, similar to Serine carboxypeptidase II chains A and B (SP:P08819) (EC 3.4.16.6) (Triticum aestivum (Wheat))	5.97863	NS
De-regulated in leaves only	At3g23230	encodes a member of the ERF (ethylene response factor) subfamily B-3 of ERF/AP2 transcription factor family. The protein contains one AP2 domain. There are 18 members in this subfamily including ATERF-1, ATERF-2, AND ATERF-5.	5.72105	NS
De-regulated in leaves only	At5g05530	zinc finger (C3HC4-type RING finger) family protein, contains Pfam profile: PF00097 zinc finger, C3HC4 type (RING finger)	5.69744	NS
De-regulated in leaves only	At2g44840	ATERF13__encodes a member of the ERF (ethylene response factor) subfamily B-3 of ERF/AP2 transcription factor family. The protein contains one AP2 domain. There are 18 members in this subfamily including ATERF-1, ATERF-2, AND ATERF-5.	5.66422	NS
De-regulated in leaves only	At3g48360	speckle-type POZ protein-related, contains Pfam PF00651 : BTB/POZ domain; similar to Speckle-type POZ protein (SP:O43791) (Homo sapiens)	5.57637	NS
De-regulated in leaves only	At4g24570	mitochondrial substrate carrier family protein, contains Pfam profile: PF00153 mitochondrial carrier protein	5.51292	NS
De-regulated in leaves only	At1g36060	encodes a member of the DREB subfamily A-6 of ERF/AP2 transcription factor family. The protein contains one AP2 domain. There are 8 members in this subfamily including RAP2.4.	5.47057	NS
De-regulated in leaves only	At3g21870	cyclin family protein, similar to cyclin 2 (Trypanosoma brucei) GI:7339572, cyclin 6 (Trypanosoma cruzi) GI:12005317; contains Pfam profile PF00134: Cyclin, N-terminal domain	5.37887	NS
De-regulated in leaves only	At1g79360	transporter-related, low similarity to SP:O76082 Organic cation/carnitine transporter 2 (Solute carrier family 22, member 5) (High-affinity sodium-dependent carnitine cotransporter) {Homo sapiens}; contains Pfam profile PF00083: major facilitator superfamily protein	5.36551	NS
De-regulated in leaves only	At1g80840	WRKY40_ATWRKY40__WRKY family transcription factor, similar to WRKY transcription factor GB:BAA87058 GI:6472585 from (Nicotiana tabacum)	5.3281	NS
De-regulated in leaves only	At1g15010	expressed protein	5.27304	NS
De-regulated in leaves only	At4g27280	calcium-binding EF hand family protein, similar to EF-hand Ca2+-binding protein CCD1 (Triticum aestivum) GI:9255753; contains INTERPRO:IPR002048 calcium-binding EF-hand domain	5.27137	NS
De-regulated in leaves only	At2g30020	protein phosphatase 2C, putative / PP2C, putative, similar to protein phosphatase 2C (GI:4587992){Arabidopsis thaliana}	5.18618	NS
De-regulated in leaves only	At1g14860	ATNUDT18__MutT/nudix family protein, low similarity to SP:Q09790 Diadenosine 5`,5```-P1,P6-hexaphosphate hydrolase (EC 3.6.1.-) (Ap6A hydrolase) {Schizosaccharomyces pombe}; contains Pfam profile PF00293: NUDIX domain	5.16248	NS
De-regulated in leaves only	At2g30370	allergen-related, weak similarity to pollen major allergen 2 protein (Juniperus ashei) gi:9955725:emb:CAC05582	5.10469	NS
De-regulated in leaves only	At2g25460	expressed protein	5.03119	NS
De-regulated in leaves only	At1g12080	expressed protein	4.92606	0.437294
De-regulated in leaves only	At4g37220	stress-responsive protein, putative, similar to cold acclimation WCOR413-like protein gamma form (Hordeum vulgare) gi:18449100:gb:AAL69988; similar to stress-regulated protein SAP1 (Xerophyta viscosa) gi:21360378:gb:AAM47505	4.89366	NS
De-regulated in leaves only	At4g08040	ACS11__1-aminocyclopropane-1-carboxylate synthase, putative / ACC synthase, putative, similar to ACC synthase from Malus sylvestris (SP:P37821), Solanum tuberosum (GI:520914)	4.87778	NS
De-regulated in leaves only	At4g28530	ANAC074__no apical meristem (NAM) family protein, contains Pfam PF02365: No apical meristem (NAM) domain; No apical meristem gene (NAM), required for pattern formation in embryos and flowers-Petunia hybrida, PATCHX:E205713	4.85711	NS
De-regulated in leaves only	At2g32200	expressed protein, similar to expressed protein [Arabidopsis thaliana] (TAIR:At2g32210.1)	4.84969	NS
De-regulated in leaves only	At5g59570	myb family transcription factor, contains Pfam profile: PF00249 myb-like DNA-binding domain	4.81803	0.0248139
De-regulated in leaves only	At4g08950	phosphate-responsive protein, putative (EXO), similar to phi-1 (phosphate-induced gene) (Nicotiana tabacum) GI:3759184; contains Pfam profile PF04674: Phosphate-induced protein 1 conserved region	4.75456	NS
De-regulated in leaves only	At2g37290	RabGAP/TBC domain-containing protein, low similarity to Rab6 GTPase activating protein, GAPCenA (Homo sapiens) GI:12188746; contains Pfam profile PF00566: TBC domain	4.69344	NS
De-regulated in leaves only	At1g74450	expressed protein	4.66703	NS
De-regulated in leaves only	At5g45340	CYP707A3__cytochrome P450 family protein, similar to SP:Q42569:C901_ARATH Cytochrome P450 90A1 (SP:Q42569) (Arabidopsis thaliana); contains Pfam profile: PF00067: Cytochrome P450	4.6432	0.369463
De-regulated in leaves only	At2g46990	IAA20__auxin-responsive protein / indoleacetic acid-induced protein 20 (IAA20), identical to SP:O24410 Auxin-responsive protein IAA20 (Indoleacetic acid-induced protein 20) {Arabidopsis thaliana}	4.62846	NS
De-regulated in leaves only	At4g13540	expressed protein	4.61015	0.269702
De-regulated in leaves only	At3g46620	zinc finger (C3HC4-type RING finger) family protein, contains Pfam domain, PF00097: Zinc finger, C3HC4 type (RING finger)	4.59923	NS
De-regulated in leaves only	At3g24520	AT-HSFC1_HSFC1__heat shock transcription factor family protein, contains Pfam profile: PF00447 HSF-type DNA-binding domain	4.42899	NS
De-regulated in leaves only	At1g23710	expressed protein	4.39697	NS
De-regulated in leaves only	At3g06890	expressed protein	4.31857	NS
De-regulated in leaves only	At3g21090	ABC transporter family protein, similar to ATP-binding cassette, sub-family G (WHITE), member 2 GB:NP_036050 from (Mus musculus)	4.29925	NS
De-regulated in leaves only	At3g50800	expressed protein	4.29524	0.294699
De-regulated in leaves only	At3g15440	expressed protein	4.25587	NS
De-regulated in leaves only	At2g38400	AGT3__alanine--glyoxylate aminotransferase, putative / beta-alanine-pyruvate aminotransferase, putative / AGT, putative, similar to SP:Q64565 Alanine--glyoxylate aminotransferase 2, mitochondrial precursor (EC 2.6.1.44) (AGT 2) (Beta-alanine-pyruvate aminotransferase) {Rattus norvegicus}; contains Pfam profile PF00202: aminotransferase, class III	4.2268	NS
De-regulated in leaves only	At1g30190	expressed protein, ; expression supported by MPSS	4.1664	NS
De-regulated in leaves only	At1g27730	ZAT10_STZ__Salt tolerance zinc finger protein responsive to chitin oligomers.	4.16325	NS
De-regulated in leaves only	At1g61470	CCR4-NOT transcription complex protein, putative, similar to SWISS-PROT:Q60809 CCR4-NOT transcription complex, subunit 7 (CCR4-associated factor 1, (CAF1) (Mus musculus)	4.14965	NS
De-regulated in leaves only	At4g01950	ATGPAT3_GPAT3__Encodes a member of a family of proteins with glycerol-3-phosphate acyltransferase activity.	4.13318	NS
De-regulated in leaves only	At1g72240	expressed protein, similar to expressed protein [Arabidopsis thaliana] (TAIR:At1g22470.1); contains domain SER_RICH (PS50324)	4.12241	NS
De-regulated in leaves only	At4g26288		4.0874	NS
De-regulated in leaves only	At1g09420	G6PD4__Encodes a protein similar to glucose-6-phosphate dehydrogenase but, based on amino acid differences in the active site and lack of activity, does not encode a functional G6PDH. The amino acid sequence for the consensus sequence of the G6PDH active site (DHYLGKE) differs in three places in this protein. gc exon splice site at 20574 is based on protein alignment, and is not confirmed experim…	4.0673	NS
De-regulated in leaves only	At4g27657	expressed protein	4.03148	NS
De-regulated in leaves only	At3g28340	galactinol synthase, putative	3.99109	NS
De-regulated in leaves only	At1g62480	vacuolar calcium-binding protein-related, contains weak similarity to vacuolar calcium binding protein (Raphanus sativus) gi:9049359:dbj:BAA99394	3.99032	NS
De-regulated in leaves only	At3g55980	zinc finger (CCCH-type) family protein, contains Pfam domain, PF00642: Zinc finger C-x8-C-x5-C-x3-H type (and similar) and Pfam domain, PF00023: Ankyrin repeat	3.98649	NS
De-regulated in leaves only	At1g03090	MCCA__methylcrotonyl-CoA carboxylase alpha chain, mitochondrial / 3-methylcrotonyl-CoA carboxylase 1 (MCCA), nearly identical to SP:Q42523 Methylcrotonyl-CoA carboxylase alpha chain, mitochondrial precursor (EC 6.4.1.4) (3-Methylcrotonyl-CoA carboxylase 1) (MCCase alpha subunit) (3-methylcrotonyl-CoA:carbon dioxide ligase alpha subunit) {Arabidopsis thaliana}	3.97605	0.261592
De-regulated in leaves only	At1g76600	expressed protein	3.97007	NS
De-regulated in leaves only	At1g14870	expressed protein, similar to PGPS/D12 (Petunia x hybrida) GI:4105794; contains Pfam profile PF04749: Protein of unknown function, DUF614	3.9274	NS
De-regulated in leaves only	At1g25400	expressed protein, similar to unknown protein GI:6714347 from (Arabidopsis thaliana)	3.90814	NS
De-regulated in leaves only	At1g07135	glycine-rich protein	3.87552	NS
De-regulated in leaves only	At5g46590	ANAC096__no apical meristem (NAM) family protein, contains Pfam PF02365: No apical meristem (NAM) domain;	3.84299	NS
De-regulated in leaves only	At4g27652	expressed protein	3.81648	NS
De-regulated in leaves only	At1g05835		3.81359	0.0615806
De-regulated in leaves only	At3g06850	BCE2_DIN3_LTA1__branched chain alpha-keto acid dehydrogenase E2 subunit (din3), identical to branched chain alpha-keto acid dehydrogenase E2 subunit (din3) (Arabidopsis thaliana) GI:7021284	3.80551	0.406806
De-regulated in leaves only	At1g31040	zinc-binding protein-related, simialr to zinc-binding protein (Pisum sativum) GI:16117799	3.7986	NS
De-regulated in leaves only	At4g37730	bZIP transcription factor family protein, contains Pfam profile: PF00170 bZIP transcription factor	3.6791	0.167717
De-regulated in leaves only	At4g27590	copper-binding protein-related, low similarity to copper homeostasis factor gi:3168840 from Arabidopsis thaliana; contains Pfam profile PF00403: Heavy-metal-associated domain	3.6033	NS
De-regulated in leaves only	At2g02930	ATGSTF3_GST16__glutathione S-transferase, putative	3.58747	NS
De-regulated in leaves only	At3g44260	CCR4-NOT transcription complex protein, putative, similar to SWISS-PROT:Q9UFF9 CCR4-NOT transcription complex, subunit 8 (CAF1-like protein, CALIFp) (Homo sapiens)	3.58472	NS
De-regulated in leaves only	At1g64660	Cys/Met metabolism pyridoxal-phosphate-dependent enzyme family protein, similar to SP:P13254 Methionine gamma-lyase (EC 4.4.1.11) (L-methioninase) {Pseudomonas putida}; contains Pfam profile PF01053: Cys/Met metabolism PLP-dependent enzyme	3.53901	NS
De-regulated in leaves only	At5g44585		3.51683	NS
De-regulated in leaves only	At4g37610	TAZ zinc finger family protein / BTB/POZ domain-containing protein, contains Pfam PF00651 : BTB/POZ domain; contains Pfam PF02135 : TAZ zinc finger; similar to Speckle-type POZ protein (SP:O43791) (Homo sapiens)	3.51222	NS
De-regulated in leaves only	At1g56660	expressed protein	3.48815	0.228272
De-regulated in leaves only	At1g28370	ATERF11_ERF11__encodes a member of the ERF (ethylene response factor) subfamily B-1 of ERF/AP2 transcription factor family. The protein contains one AP2 domain. There are 15 members in this subfamily including ATERF-3, ATERF-4, ATERF-7, and leafy petiole.	3.47536	NS
De-regulated in leaves only	At1g35210	expressed protein	3.46289	NS
De-regulated in leaves only	At5g22250	CCR4-NOT transcription complex protein, putative, similar to SWISS-PROT:Q60809 CCR4-NOT transcription complex, subunit 7 (CCR4-associated factor 1, (CAF1) (Mus musculus)	3.45112	NS
De-regulated in leaves only	At3g56880	VQ motif-containing protein, contains PF05678: VQ motif	3.43116	NS
De-regulated in leaves only	At3g16120	dynein light chain, putative, similar to SP:O02414 Dynein light chain LC6, flagellar outer arm {Anthocidaris crassispina}; contains Pfam profile PF01221: Dynein light chain type 1	3.4284	0.077434
De-regulated in leaves only	At5g64310	AGP1__arabinogalactan-protein (AGP1), identical to gi:3883120 gb:AAC77823	3.40141	0.490698
De-regulated in leaves only	At1g72920	disease resistance protein (TIR-NBS class), putative, domain signature TIR-NBS exists, suggestive of a disease resistance protein.	3.40024	NS
De-regulated in leaves only	At5g61600	encodes a member of the ERF (ethylene response factor) subfamily B-3 of ERF/AP2 transcription factor family. The protein contains one AP2 domain. There are 18 members in this subfamily including ATERF-1, ATERF-2, AND ATERF-5.	3.37225	NS
De-regulated in leaves only	At5g19230	expressed protein	3.32467	NS
De-regulated in leaves only	At4g15258		3.31759	NS
De-regulated in leaves only	At1g54740	expressed protein, similar to expressed protein [Arabidopsis thaliana] (TAIR:At1g22110.1); similar to hypothetical protein [Plasmodium falciparum 3D7] (GB:NP_704767.1)	3.2946	NS
De-regulated in leaves only	At4g38830	protein kinase family protein, contains Pfam domain PF00069: Protein kinase domain	3.26549	NS
De-regulated in leaves only	At5g24800	BZO2H2__bZIP transcription factor family protein, contains Pfam profile: PF00170 bZIP transcription factor; identical to cDNA bZIP protein BZO2H2 GI:10954096	3.25946	NS
De-regulated in leaves only	At2g40140	CZF1__zinc finger (CCCH-type) family protein, contains Pfam domain, PF00642: Zinc finger C-x8-C-x5-C-x3-H type (and similar) and Pfam domain, PF00023: Ankyrin repeat	3.20798	NS
De-regulated in leaves only	At1g21400	2-oxoisovalerate dehydrogenase, putative / 3-methyl-2-oxobutanoate dehydrogenase, putative / branched-chain alpha-keto acid dehydrogenase E1 alpha subunit, putative, similar to branched-chain alpha-keto acid dehydrogenase E1-alpha subunit (Gallus gallus) GI:12964598; contains Pfam profile PF00676: Dehydrogenase E1 component	3.16284	NS
De-regulated in leaves only	At2g37060	CCAAT-box binding transcription factor, putative, similar to CAAT-box DNA binding protein subunit B (NF-YB) (SP:P25209) (GI:22380) (Zea mays); contains Pfam PF00808 : Histone-like transcription factor (CBF/NF-Y) and archaeal histone	3.09142	NS
De-regulated in leaves only	At1g47578		3.07962	NS
De-regulated in leaves only	At2g15880	leucine-rich repeat family protein / extensin family protein, similar to extensin-like protein (Lycopersicon esculentum) gi:5917664:gb:AAD55979; contains leucine-rich repeats, Pfam:PF00560; contains proline rich extensin domains, INTERPRO:IPR002965	3.06287	NS
De-regulated in leaves only	At3g13450	DIN4__2-oxoisovalerate dehydrogenase / 3-methyl-2-oxobutanoate dehydrogenase / branched-chain alpha-keto acid dehydrogenase E1 beta subunit (DIN4), identical to branched chain alpha-keto acid dehydrogenase E1 beta subunit (Arabidopsis thaliana) GI:7021286	3.05457	NS
De-regulated in leaves only	At3g13175	expressed protein	3.05138	0.203809
De-regulated in leaves only	At2g43400	ETFQO__electron transfer flavoprotein-ubiquinone oxidoreductase family protein, contains Pfam profile: PF05187 Electron transfer flavoprotein-ubiquinone oxidoreductase	3.04671	0.351175
De-regulated in leaves only	At3g16950	LPD1__dihydrolipoamide dehydrogenase 1, plastidic / lipoamide dehydrogenase 1 (PTLPD1), identical to plastidic lipoamide dehydrogenase from Arabidopsis thaliana (gi:7159282)	3.03619	NS
De-regulated in leaves only	At5g55700	similar to beta-amylase (CT-BMY) / 1,4-alpha-D-glucan maltohydrolase [Arabidopsis thaliana] (TAIR:At4g17090.1); similar to beta-amylase [Glycine max] (GB:CAI39244.1); contains InterPro domain Glycoside hydrolase, family 14 (InterPro:IPR001554); contains InterPro domain Glycoside hydrolase, family 14B, plant (InterPro:IPR001371)	3.036	NS
De-regulated in leaves only	At3g12830	auxin-responsive family protein, similar to auxin-induced protein (SP:P33082) (Glycine max)	3.00651	NS
De-regulated in leaves only	At3g14540	terpene synthase/cyclase family protein, similar to terpene synthase GB:CAA72074 from (Arabidopsis thaliana)	2.98486	NS
De-regulated in leaves only	At4g24110	expressed protein	2.98031	0.373595
De-regulated in leaves only	At5g65300	expressed protein	2.97747	0.22669
De-regulated in leaves only	At1g20480	4-coumarate--CoA ligase family protein / 4-coumaroyl-CoA synthase family protein, similar to SP:Q9S725 from Arabidopsis thaliana and SP:P17814 from Oryza sativa; contains Pfam AMP-binding enzyme domain PF00501	2.95587	0.313172
De-regulated in leaves only	At2g22880	VQ motif-containing protein, contains PF05678: VQ motif	2.94113	NS
De-regulated in leaves only	At5g51190	encodes a member of the ERF (ethylene response factor) subfamily B-3 of ERF/AP2 transcription factor family. The protein contains one AP2 domain. There are 18 members in this subfamily including ATERF-1, ATERF-2, AND ATERF-5.	2.87336	NS
De-regulated in leaves only	At1g49130	zinc finger (B-box type) family protein, contains similarity to zinc finger protein GI:3618318 from (Oryza sativa)	2.86185	NS
De-regulated in leaves only	At3g57520	alkaline alpha galactosidase, putative, similar to alkaline alpha galactosidase II (Cucumis melo) GI:29838631; contains Pfam profile PF05691: Raffinose synthase or seed imbibition protein Sip1	2.86087	NS
De-regulated in leaves only	At4g24230	VEP1_AWI31__acyl-CoA binding protein, putative / ACBP, putative, contains similarity to acyl-CoA binding protein 2 (Arabidopsis thaliana) gi:12039034:gb:AAG46057	2.86003	NS
De-regulated in leaves only	At3g20810	transcription factor jumonji (jmjC) domain-containing protein, contains Pfam domain PF02373: jmjC domain	2.85985	0.0632888
De-regulated in leaves only	At1g72910	disease resistance protein (TIR-NBS class), putative, domain signature TIR-NBS exists, suggestive of a disease resistance protein.	2.82892	NS
De-regulated in leaves only	At5g59550	zinc finger (C3HC4-type RING finger) family protein, contains Pfam domain, PF00097: Zinc finger, C3HC4 type (RING finger)	2.81192	NS
De-regulated in leaves only	At5g24590	ANAC091_TIP__turnip crinkle virus-interacting protein / TCV-interacting protein (TIP), contains Pfam PF02365: No apical meristem (NAM) domain; similar to NAC2 (GI:6456751) {Arabidopsis thaliana}; identical to cDNA TIP mRNA, GI:9408600	2.79532	NS
De-regulated in leaves only	At5g50915	basic helix-loop-helix (bHLH) family protein, contains Pfam profile: PF00010 helix-loop-helix DNA-binding domain	2.77471	NS
De-regulated in leaves only	At2g35930	U-box domain-containing protein, similar to immediate-early fungal elicitor protein CMPG1 (Petroselinum crispum) GI:14582200; contains Pfam profile PF04564: U-box domain	2.74981	NS
De-regulated in leaves only	At1g30820	CTP synthase, putative / UTP--ammonia ligase, putative, similar to SP:P17812 CTP synthase (EC 6.3.4.2) (UTP--ammonia ligase) {Homo sapiens}; contains Pfam profile PF00117: glutamine amidotransferase class-I; similar to ESTs gb:AA660762, gb:AA220982, dbj:AU008137, gb:AI054783, and gb:AA100804	2.72855	NS
De-regulated in leaves only	At1g23870	ATTPS9_TPS9__glycosyl transferase family 20 protein / trehalose-phosphatase family protein, contains Pfam profile: PF02358 trehalose-phosphatase	2.72179	NS
De-regulated in leaves only	At2g43840	UDP-glucoronosyl/UDP-glucosyl transferase family protein, contains Pfam profile: PF00201 UDP-glucoronosyl and UDP-glucosyl transferase	2.71283	NS
De-regulated in leaves only	At1g12780	Encodes a UDP-glucose epimerase that catalyzes the interconversion of the sugar nucleotides UDP-glucose UDP-galactose via a UDP-4-keto-hexose intermediate.	2.70628	NS
De-regulated in leaves only	At2g28500	similar to LOB domain protein 1 / lateral organ boundaries domain protein 1 (LBD1) [Arabidopsis thaliana] (TAIR:At1g07900.1); similar to putatvie LOB domain protein [Oryza sativa (japonica cultivar-group)] (GB:AAV33307.1); contains InterPro domain Protein of unknown function DUF260 (InterPro:IPR004883); contains InterPro domain Proline-rich region (InterPro:IPR000694)	2.69722	NS
De-regulated in leaves only	At3g29240	expressed protein, similar to At1g33780 (Arabidopsis thaliana); contains Pfam profile PF02622: Uncharacterized ACR, COG1678	2.69362	NS
De-regulated in leaves only	At1g55810	uracil phosphoribosyltransferase, putative / UMP pyrophosphorylase, putative / UPRTase, putative, similar to SP:O65583 Uracil phosphoribosyltransferase (EC 2.4.2.9) (UMP pyrophosphorylase) (UPRTase) {Arabidopsis thaliana}; contains Pfam profile PF00485: Phosphoribulokinase / Uridine kinase family	2.67598	0.418712
De-regulated in leaves only	At1g61890	MATE efflux family protein, similar to ripening regulated protein DDTFR18 (Lycopersicon esculentum) GI:12231296; contains Pfam profile PF01554: Uncharacterized membrane protein family	2.65666	NS
De-regulated in leaves only	At2g46510	basic helix-loop-helix (bHLH) family protein, contains Pfam profile: PF00010 helix-loop-helix DNA-binding domain	2.65553	NS
De-regulated in leaves only	At1g24090	RNase H domain-containing protein, very low similarity to GAG-POL precursor (Oryza sativa (japonica cultivar-group)) GI:5902445; contains Pfam profiles PF00075: RNase H, PF04134: Protein of unknown function, DUF393	2.64964	0.35017
De-regulated in leaves only	At4g18340	glycosyl hydrolase family 17 protein, similar to elicitor inducible chitinase Nt-SubE76 GI:11071974 from (Nicotiana tabacum)	2.63125	NS
De-regulated in leaves only	At1g32928	expressed protein	2.62496	NS
De-regulated in leaves only	At2g22500	mitochondrial substrate carrier family protein, contains Pfam profile: PF00153 mitochondrial carrier protein	2.61838	NS
De-regulated in leaves only	At5g14410	expressed protein	2.60062	NS
De-regulated in leaves only	At3g49530	ANAC062__no apical meristem (NAM) family protein, contains Pfam PF02365: No apical meristem (NAM) domain; similar to NAC2 - Arabidopsis thaliana, EMBL:AF201456	2.59199	NS
De-regulated in leaves only	At5g18170	GDH1__glutamate dehydrogenase 1 (GDH1), identical to glutamate dehydrogenase 1 (GDH 1) (Arabidopsis thaliana) SWISS-PROT:Q43314	2.57798	NS
De-regulated in leaves only	At5g05410	DREB2A_DREB2__encodes a member of the DREB subfamily A-2 of ERF/AP2 transcription factor family (DREB2A). The protein contains one AP2 domain. There are eight members in this subfamily including DREB2B.	2.55708	NS
De-regulated in leaves only	At2g35744		2.55302	NS
De-regulated in leaves only	At2g37690	phosphoribosylaminoimidazole carboxylase, putative / AIR carboxylase, putative, similar to SP:P55195 Phosphoribosylaminoimidazole carboxylase, chloroplast precursor (EC 4.1.1.21) (AIR carboxylase) (AIRC) {Vigna aconitifolia}; contains Pfam profiles PF02222: ATP-grasp domain, PF00731: AIR carboxylase	2.53732	NS
De-regulated in leaves only	At5g65350	histone H3, nearly identical to histone H3 from Zea mays SP:P05203, Medicago sativa GI:166384, Encephalartos altensteinii SP:P08903, Pisum sativum SP:P02300; contains Pfam profile PF00125 Core histone H2A/H2B/H3/H4	2.53694	NS
De-regulated in leaves only	At1g52240	ATROPGEF11__Encodes a member of KPP-like gene family, homolog of KPP (kinase partner protein) gene in tomato. Also a member of the RopGEF (guanine nucleotide exchange factor) family, containing the novel PRONE domain (plant-specific Rop nucleotide exchanger), which is exclusively active towards members of the Rop subfamily .	2.52961	0.195454
De-regulated in leaves only	At2g42900	expressed protein	2.52506	0.183568
De-regulated in leaves only	At1g26450	beta-1,3-glucanase-related, similar to beta-1,3-glucanase GI:15150341 from (Camellia sinensis); C-terminal homology only	2.52413	0.0627195
De-regulated in leaves only	At1g64380	encodes a member of the DREB subfamily A-6 of ERF/AP2 transcription factor family. The protein contains one AP2 domain. There are 8 members in this subfamily including RAP2.4.	2.51712	NS
De-regulated in leaves only	At4g22753	SMO1-3_ATSMO1_ATSMO1-3_SMO1__sterol desaturase family protein, similar to sterol 4-alpha-methyl-oxidase GI:16973471 from (Arabidopsis thaliana); contains Pfam profile PF01598: Sterol desaturase	2.51229	NS
De-regulated in leaves only	At3g26690	ATNUDT13__MutT/nudix family protein, similar to SP:Q09790 Diadenosine 5`,5```-P1,P6-hexaphosphate hydrolase (EC 3.6.1.-) (Ap6A hydrolase) {Schizosaccharomyces pombe}; contains Pfam profile PF00293: NUDIX domain	2.50449	NS
De-regulated in leaves only	At3g24518		2.47311	NS
De-regulated in leaves only	At1g32920	expressed protein	2.47206	NS
De-regulated in leaves only	At5g03310	auxin-responsive family protein, similar to indole-3-acetic acid induced protein ARG7 (SP:P32295) (Vigna radiata)	2.4592	0.109555
De-regulated in leaves only	At1g66400	calmodulin-related protein, putative, similar to calmodulin-related protein 2, touch-induced from SP:P25070 (Arabidopsis thaliana); contains Pfam profile: PF00036 EF hand (4 copies)	2.44192	NS
De-regulated in leaves only	At3g49320	expressed protein, contains Pfam profile PF03690: Uncharacterised protein family (UPF0160)	2.43193	NS
De-regulated in leaves only	At2g43930	protein kinase family protein, contains similarity to NPK1-related protein kinase 2 GI:2342425 from (Arabidopsis thaliana)	2.42558	NS
De-regulated in leaves only	At1g18270	ketose-bisphosphate aldolase class-II family protein, low similarity to KbaY (tagatose-1,6-bisphosphate aldolase) (Escherichia coli) GI:8895753; contains Pfam profile PF01116: Fructose-bisphosphate aldolase class-II	2.41303	NS
De-regulated in leaves only	At4g21970	expressed protein, contains Pfam profile PF04520: Protein of unknown function, DUF584; expression supported by MPSS	2.40863	NS
De-regulated in leaves only	At3g15210	ATERF4_ATERF-4_ERF4_RAP2.5__Encodes a member of the ERF (ethylene response factor) subfamily B-1 of ERF/AP2 transcription factor family (ATERF-4). The protein contains one AP2 domain. Acts as a negative regulator of JA-responsive defense gene expression and resistance to the necrotrophic fungal pathogen Fusarium oxysporum and antagonizes JA inhibition of root elongation.	2.39598	NS
De-regulated in leaves only	At1g76650	calcium-binding EF hand family protein, similar to regulator of gene silencing calmodulin-related protein GI:12963415 from (Nicotiana tabacum); contains INTERPRO:IPR002048 calcium-binding EF-hand domain	2.38639	NS
De-regulated in leaves only	At3g07860	expressed protein	2.3859	NS
De-regulated in leaves only	At5g46840	RNA recognition motif (RRM)-containing protein, contains InterPro entry IPR000504: RNA-binding region RNP-1 (RNA recognition motif) (RRM)	2.36455	NS
De-regulated in leaves only	At1g79840	GL2__homeobox-leucine zipper protein 10 (HB-10) / HD-ZIP transcription factor 10 / homeobox protein (GLABRA2), identical to homeobox protein (GLABRA2) (homeobox-leucine zipper protein ATHB-10) (HD-ZIP protein ATHB-10) GB:P46607 (Arabidopsis thaliana)	2.35655	0.131832
De-regulated in leaves only	At2g14170	ALDH6B2__methylmalonate-semialdehyde dehydrogenase, putative, similar to methylmalonate-semialdehyde dehydrogenase (acylating), mitochondrial precursor (MMSDH) (Rattus norvegicus) SWISS-PROT:Q02253	2.35648	0.416821
De-regulated in leaves only	At1g10660	expressed protein	2.34677	NS
De-regulated in leaves only	At3g47640	basic helix-loop-helix (bHLH) family protein, contains Pfam profile: PF00010 helix-loop-helix DNA-binding domain	2.33333	NS
De-regulated in leaves only	At2g29660	zinc finger (C2H2 type) family protein, contains zinc finger, C2H2 type, domain, PROSITE:PS00028	2.32619	NS
De-regulated in leaves only	At1g22890	expressed protein	2.31556	NS
De-regulated in leaves only	At3g15620	UVR3__6-4 photolyase (UVR3), identical to 6-4 photolyase (UVR3) GB:AB003687 (Arabidopsis thaliana) (Nucleic Acids Res. 26 (2), 638-644 (1998))	2.30389	0.183885
De-regulated in leaves only	At1g07040	expressed protein	2.29231	NS
De-regulated in leaves only	At3g57450	expressed protein	2.29137	NS
De-regulated in leaves only	At2g39570	ACT domain-containing protein, contains Pfam ACT domain PF01842	2.28762	NS
De-regulated in leaves only	At3g45610	Dof-type zinc finger domain-containing protein, identical to dof6 zinc finger protein GI:5689615 from (Arabidopsis thaliana)	2.28541	0.284977
De-regulated in leaves only	At3g47430	peroxisomal biogenesis factor 11 family protein / PEX11 family protein, contains Pfam PF05648: Peroxisomal biogenesis factor 11 (PEX11)	2.2635	NS
De-regulated in leaves only	At1g02620	GTP-binding protein (SAR1A), identical to GTP-binding protein Sar1 (SP:O04834) (Arabidopsis thaliana); contains domain PF00025: ADP-ribosylation factor family	2.2515	NS
De-regulated in leaves only	At2g23910	cinnamoyl-CoA reductase-related, similar to cinnamoyl-CoA reductase from Pinus taeda (GI:17978649), Saccharum officinarum (GI:3341511)	2.24951	0.0579273
De-regulated in leaves only	At5g15240	amino acid transporter family protein, low similarity to amino acid transporter system A3 (Homo sapiens) GI:13876616; belongs to INTERPRO:IPR002422 amino acid/polyamine transporter, family II	2.2431	NS
De-regulated in leaves only	At5g16200	50S ribosomal protein-related, contains weak similarity to Cyanelle 50S ribosomal protein L35. (Swiss-Prot:P14810) (Cyanophora paradoxa)	2.2309	NS
De-regulated in leaves only	At1g25260	acidic ribosomal protein P0-related, contains similarity to 60S acidic ribosomal protein GI:5815233 from (Homo sapiens)	2.22952	NS
De-regulated in leaves only	At2g39650	expressed protein, contains Pfam profile PF04720: Protein of unknown function (DUF506)	2.21852	NS
De-regulated in leaves only	At3g54363		2.21379	NS
De-regulated in leaves only	At4g15910	ATDI21_DI21__drought-responsive protein / drought-induced protein (Di21), identical to GI:469112; contains PF03242 Late embryogenesis abundant protein domain	2.20229	NS
De-regulated in leaves only	At5g14580	polyribonucleotide nucleotidyltransferase, putative, similar to Swiss-Prot:P05055 polyribonucleotide nucleotidyltransferase (EC 2.7.7.8) (Polynucleotide phosphorylase) (PNPase) (Escherichia coli)	2.19025	NS
De-regulated in leaves only	At4g21320	(2R)-phospho-3-sulfolactate synthase-related, contains weak similarity to Swiss-Prot:Q57703 (2R)-phospho-3-sulfolactate synthase (PSL synthase) (Methanococcus jannaschii)	2.18862	0.336182
De-regulated in leaves only	At1g63180	UDP-glucose 4-epimerase, putative / UDP-galactose 4-epimerase, putative / Galactowaldenase, putative, strong similarity to SP:Q42605 (GI:1143392) from (Arabidopsis thaliana) (Arch. Biochem. Biophys. 327 (1), 27-34 (1996))	2.16955	0.398017
De-regulated in leaves only	At5g42780	zinc finger homeobox family protein / ZF-HD homeobox family protein, similar to unknown protein (pir::T05568)	2.16701	NS
De-regulated in leaves only	At2g33510	expressed protein	2.1641	NS
De-regulated in leaves only	At3g56140	expressed protein, At2g40400 - Arabidopsis thaliana, EMBL:AC007020	2.16361	NS
De-regulated in leaves only	At3g51840	ACX4_ATG6_ATSCX__short-chain acyl-CoA oxidase, identical to Short-chain acyl CoA oxidase (Arabidopsis thaliana) GI:5478795; contains InterPro entry IPR006089: Acyl-CoA dehydrogenase	2.16076	NS
De-regulated in leaves only	At1g55510	BCDH BETA1__2-oxoisovalerate dehydrogenase, putative / 3-methyl-2-oxobutanoate dehydrogenase, putative / branched-chain alpha-keto acid dehydrogenase E1 beta subunit, putative, strong similarity to branched chain alpha-keto acid dehydrogenase E1 beta subunit (Arabidopsis thaliana) GI:7021286; contains Pfam profiles PF02779: Transketolase, pyridine binding domain, PF02780: Transketolase, C-termina…	2.1578	NS
De-regulated in leaves only	At2g38820	expressed protein, contains Pfam profile PF04720: Protein of unknown function (DUF506)	2.15562	NS
De-regulated in leaves only	At5g04770	CAT6__amino acid permease family protein, similar to cationic amino acid transporter-1 (Rattus norvegicus) GI:1589917; contains Pfam profile PF00324: Amino acid permease	2.15276	0.231469
De-regulated in leaves only	At5g58370	expressed protein	2.14318	NS
De-regulated in leaves only	At5g02150	expressed protein	2.14039	NS
De-regulated in leaves only	At3g16720	ATL2__zinc finger (C3HC4-type RING finger) family protein, contains Pfam domain, PF00097: Zinc finger, C3HC4 type (RING finger)	2.13835	NS
De-regulated in leaves only	At3g48380	expressed protein	2.13788	NS
De-regulated in leaves only	At4g37300	expressed protein	2.13287	NS
De-regulated in leaves only	At1g27360	squamosa promoter-binding protein-like 11 (SPL11), identical to squamosa promoter binding protein-like 11 (Arabidopsis thaliana) GI:5931665; contains Pfam profile PF03110: SBP domain	2.13056	NS
De-regulated in leaves only	At3g07650	COL9__zinc finger (B-box type) family protein, similar to zinc finger protein GB:BAA33206 (Oryza sativa)	2.12908	0.0575398
De-regulated in leaves only	At1g10682		2.11786	NS
De-regulated in leaves only	At3g19100	calcium-dependent protein kinase, putative / CDPK, putative, similar to calcium/calmodulin-dependent protein kinase CaMK3 (Nicotiana tabacum) gi:16904226:gb:AAL30820; contains protein kinase domain, Pfam:PF00069; contains serine/threonine protein kinase domain, INTERPRO:IPR002290	2.10681	0.199272
De-regulated in leaves only	At2g22850	bZIP transcription factor family protein, contains a bZIP transcription factor basic domain signature (PDOC00036)	2.10526	0.44547
De-regulated in leaves only	At5g42900	expressed protein, similar to unknown protein (pir::T05226)	2.09879	0.0235934
De-regulated in leaves only	At5g45660	expressed protein	2.09778	NS
De-regulated in leaves only	At1g15830	expressed protein	2.09227	NS
De-regulated in leaves only	At5g28050	cytidine/deoxycytidylate deaminase family protein, similar to SP:O34598 Guanine deaminase (EC 3.5.4.3) (Guanase) (Guanine aminase) (Guanine aminohydrolase) (GAH) (GDEase) {Bacillus subtilis}; contains Pfam profile PF00383: Cytidine and deoxycytidylate deaminase zinc-binding region	2.08636	0.487919
De-regulated in leaves only	At3g14750	expressed protein, weak similarity to Septation ring formation regulator (Swiss-Prot:O34894) (Bacillus subtilis)	2.08599	NS
De-regulated in leaves only	At1g28260	expressed protein	2.08412	NS
De-regulated in leaves only	At3g29180	expressed protein	2.07025	NS
De-regulated in leaves only	At3g55610	delta 1-pyrroline-5-carboxylate synthetase B / P5CS B (P5CS2), identical to SP:P54888	2.06899	NS
De-regulated in leaves only	At2g16650	similar to MATE efflux family protein [Arabidopsis thaliana] (TAIR:At4g21900.1); similar to OJ1656_A11.5 [Oryza sativa (japonica cultivar-group)] (GB:NP_914311.1)	2.06838	NS
De-regulated in leaves only	At5g27920	F-box family protein, contains similarity to leucine-rich repeats containing F-box protein FBL3 GI:5919219 from (Homo sapiens)	2.06228	NS
De-regulated in leaves only	At3g20440	EMB2729__similar to 1,4-alpha-glucan branching enzyme / starch branching enzyme class II (SBE2-1) [Arabidopsis thaliana] (TAIR:At2g36390.1); similar to glucan (1,4-alpha-), branching enzyme 1 [Mus musculus] (GB:NP_083079.1)	2.05855	0.416844
De-regulated in leaves only	At4g12690	expressed protein	2.05498	NS
De-regulated in leaves only	At3g49950	scarecrow transcription factor family protein, lateral suppressor protein - Lycopersicon esculentum, EMBL:AF098674	2.05143	0.0368992
De-regulated in leaves only	At5g02830	pentatricopeptide (PPR) repeat-containing protein, contains Pfam profile PF01535: PPR repeat	2.04416	NS
De-regulated in leaves only	At4g19160	expressed protein	2.04148	NS
De-regulated in leaves only	At5g24580	copper-binding family protein, similar to copper homeostasis factor gi:3168840 from Arabidopsis thaliana; contains Pfam profile PF00403: Heavy-metal-associated domain	2.04145	0.130187
De-regulated in leaves only	At5g23380	expressed protein	2.03481	NS
De-regulated in leaves only	At2g34900	IMB1__DNA-binding bromodomain-containing protein, contains bromodomain, INTERPRO:IPR001487	2.03109	NS
De-regulated in leaves only	At2g35820	expressed protein	2.02686	NS
De-regulated in leaves only	At2g03240	EXS family protein / ERD1/XPR1/SYG1 family protein, similar to PHO1 protein (Arabidopsis thaliana) GI:20069032; contains Pfam profiles PF03105: SPX domain, PF03124: EXS family	2.01447	NS
De-regulated in leaves only	At2g42290	leucine-rich repeat family protein, contains protein kinase domain, Pfam:PF00069; contains leucine-rich repeats, Pfam:PF00560	2.01224	NS
De-regulated in leaves only	At4g32920	glycine-rich protein	2.01205	NS
De-regulated in leaves only	At1g04280	expressed protein	2.01155	NS
De-regulated in leaves only	At1g03760	prefoldin subunit family protein, contains similarity to Swiss-Prot:O94763 RNA polymerase II subunit 5-mediating protein (RPB5-mediating protein) (Homo sapiens); contains Pfam profile PF02996: Prefoldin subunit	2.00406	NS
De-regulated in leaves only	At2g23320	WRKY15__WRKY family transcription factor, identical to WRKY DNA-binding protein 15 GI:13506742 from (Arabidopsis thaliana)	2.00153	NS
De-regulated in leaves only	At4g08850	leucine-rich repeat family protein / protein kinase family protein, contains Pfam domains PF00560: Leucine Rich Repeat and PF00069: Protein kinase domain	0.499924	2.10118
De-regulated in leaves only	At4g11370	RHA1A__zinc finger (C3HC4-type RING finger) family protein, strong similarity to RING-H2 finger protein RHA1a (Arabidopsis thaliana) GI:3790554; contains Pfam profile PF00097: Zinc finger, C3HC4 type (RING finger)	0.499868	NS
De-regulated in leaves only	At3g56440	AtATG18d__WD-40 repeat protein family, contains 4 WD-40 repeats (PF00400) (2 weak); PS00778 Histidine acid phosphatases active site signature; similar to Gsa12p (GI:18307769) {Pichia pastoris}similar to uncharacterized protein JM5 (GP:3114828) (Homo sapiens)	0.499627	NS
De-regulated in leaves only	At5g62220	exostosin family protein, contains Pfam profile: PF03016	0.499133	NS
De-regulated in leaves only	At3g51160	MUR1_GMD2_MUR_1__GDP-D-mannose-4,6-dehydratase (MUR1), almost identical to GDP-D-mannose-4,6-dehydratase (MUR1) GI:1764100 from (Arabidopsis thaliana)	0.498967	NS
De-regulated in leaves only	At1g24150	formin homology 2 domain-containing protein / FH2 domain-containing protein, contains formin homology 2 domain, Pfam:PF02181	0.498144	2.21531
De-regulated in leaves only	At5g02180	amino acid transporter family protein, belongs to INTERPRO:IPR002422 amino acid/polyamine transporter, family II	0.497792	NS
De-regulated in leaves only	At2g17480	MLO8__seven transmembrane MLO family protein / MLO-like protein 8 (MLO8), identical to membrane protein Mlo8 (Arabidopsis thaliana) gi:14091586:gb:AAK53801; similar to MLO protein SWISS-PROT:P93766, NCBI_gi:1877221 (Hordeum vulgare)(Barley)	0.497437	NS
De-regulated in leaves only	At3g59310	expressed protein, identical to anthocyanin-related membrane protein 1 (Arabidopsis thaliana) GI:16416383; supporting cDNA gi:16416382:dbj:AB060644.1:	0.4974	NS
De-regulated in leaves only	At3g56060	glucose-methanol-choline (GMC) oxidoreductase family protein, similar to mandelonitrile lyase from Prunus serotina (SP:P52706, SP:P52707); contains Pfam profile PF00732 GMC oxidoreductase	0.496813	NS
De-regulated in leaves only	At3g50685	expressed protein	0.49642	NS
De-regulated in leaves only	At5g66420	expressed protein	0.494247	NS
De-regulated in leaves only	At3g11420	fringe-related protein, similar to hypothetical protein GB:AAC23643 (Arabidopsis thaliana) + weak similarity to Fringe (Schistocerca gregaria)(GI:6573138);Fringe encodes an extracellular protein that regulates Notch signalling.	0.49369	NS
De-regulated in leaves only	At1g52280	Ras-related GTP-binding protein, putative, similar to RAB7D GI:1370187 from (Lotus japonicus) (Plant J. 11 (2), 237-250 (1997)); contains Pfam PF00071: Ras family	0.493589	NS
De-regulated in leaves only	At4g33220	pectinesterase family protein, contains Pfam profile: PF01095 pectinesterase	0.493075	2.06637
De-regulated in leaves only	At3g52340	SPP2__sucrose-phosphatase 2 (SPP2), identical to sucrose-phosphatase (SPP2) (Arabidopsis thaliana) GI:13811669; supporting cDNA gi:13811668:gb:AF356816.1:AF356816	0.493051	NS
De-regulated in leaves only	At4g28490	CRK6_RLK5_HAESA_RLK5__leucine-rich repeat transmembrane protein kinase, putative	0.492626	3.17934
De-regulated in leaves only	At2g31110	expressed protein	0.491867	NS
De-regulated in leaves only	At1g10690	expressed protein	0.491548	NS
De-regulated in leaves only	At3g10940	protein phosphatase-related, similar to protein phosphatase PTPKIS1 protein (GI:11595504) (Arabidopsis thaliana)	0.491542	NS
De-regulated in leaves only	At5g60400	expressed protein	0.49127	NS
De-regulated in leaves only	At5g08185	MIR162A__expressed protein, miR162a located in intron 2	0.490898	NS
De-regulated in leaves only	At5g18360	disease resistance protein (TIR-NBS-LRR class), putative, domain signature TIR-NBS-LRR exists, suggestive of a disease resistance protein.	0.490813	2.38108
De-regulated in leaves only	At3g04110	GLR1_ATGLR1.1__glutamate receptor family protein (GLR1.1) (GLR1), identical to putative glutamate receptor (GLR1) GB:AF079998 (Arabidopsis thaliana); plant glutamate receptor family, PMID:11379626	0.490331	3.92065
De-regulated in leaves only	At2g33530	SCPL46__serine carboxypeptidase S10 family protein, similar to Serine carboxypeptidase II chains A and B (SP:P08819) (EC 3.4.16.6) (Triticum aestivum (Wheat)	0.489719	NS
De-regulated in leaves only	At2g18300	basic helix-loop-helix (bHLH) family protein, contains Pfam profile: PF00010 helix-loop-helix DNA-binding domain ;supported by cDNA gi:20127067:gb:AF488597.1:	0.489435	NS
De-regulated in leaves only	At1g13210	haloacid dehalogenase-like hydrolase family protein, similar to Potential phospholipid-transporting ATPase (EC 3.6.3.1) (Chromaffin granule ATPase) from {Homo sapiens} SP:Q9Y2Q0, {Mus musculus} SP:P98200, {Bos taurus} SP:Q29449; contains InterPro accession IPR005834: Haloacid dehalogenase-like hydrolase; ESTs gb:T45045 and gb:AA394473 come from this gene	0.48927	2.2388
De-regulated in leaves only	At5g56350	pyruvate kinase, putative, similar to pyruvate kinase, cytosolic isozyme (Nicotiana tabacum) SWISS-PROT:Q42954	0.488919	NS
De-regulated in leaves only	At1g20440	COR47__dehydrin (COR47), identical to dehydrin COR47 (Cold-induced COR47 protein) (Arabidopsis thaliana) SWISS-PROT:P31168	0.488452	2.8715
De-regulated in leaves only	At1g45688	expressed protein	0.487932	NS
De-regulated in leaves only	At1g76670	transporter-related, low similarity to glucose-6-phosphate/phosphate-translocator precursor (Solanum tuberosum) GI:2997593, GDP-Mannose transporter (Arabidopsis thaliana) GI:15487237; contains Pfam profile PF00892: Integral membrane protein	0.487755	NS
De-regulated in leaves only	At1g71970	expressed protein	0.486865	NS
De-regulated in leaves only	At5g61790	calnexin 1 (CNX1), identical to calnexin homolog 1, Arabidopsis thaliana, EMBL:AT08315 (SP:P29402)	0.48652	NS
De-regulated in leaves only	At5g11790	Ndr family protein, similar to SP:O23969 Pollen specific protein SF21 {Helianthus annuus}; contains Pfam profile PF03096: Ndr family	0.486169	NS
De-regulated in leaves only	At5g62070	calmodulin-binding family protein, contains Pfam profile PF00612: IQ calmodulin-binding motif	0.484606	NS
De-regulated in leaves only	At2g31390	STH__pfkB-type carbohydrate kinase family protein, contains Pfam profile: PF00294 pfkB family carbohydrate kinase	0.484423	3.06244
De-regulated in leaves only	At5g38070	zinc finger (C3HC4-type RING finger) family protein, contains InterPro Entry IPR001841 Zn-finger, RING; contains PROSITE PS00190: Cytochrome c family heme-binding site signature	0.48407	NS
De-regulated in leaves only	At1g67950	RNA recognition motif (RRM)-containing protein	0.483619	NS
De-regulated in leaves only	At5g44720	molybdenum cofactor sulfurase family protein, weak similarity to molybdenum cofactor sulfurase (LOS5/ABA3) (Arabidopsis thaliana) GI:15407262; contains Pfam profiles PF03476: MOSC N-terminal beta barrel domain, PF03473: MOSC domain	0.483577	NS
De-regulated in leaves only	At2g39710	aspartyl protease family protein, contains profile Pfam PF00026: Eukaryotic aspartyl protease; contains Prosite PS00141: Eukaryotic and viral aspartyl proteases active site.;	0.483312	2.73928
De-regulated in leaves only	At2g04160	AIR3__subtilisin-like protease (AIR3), almost identical to subtilisin-like protease AIR3 GI:4218991 from (Arabidopsis thaliana), missing 200 aa at N-terminus	0.483288	2.9404
De-regulated in leaves only	At3g56240	CCH_ATX1_COPPER CHAPERONE__copper homeostasis factor / copper chaperone (CCH) (ATX1), identical to gi:3168840 Pfam profile PF00403: Heavy-metal-associated domain	0.482703	6.84836
De-regulated in leaves only	At4g38860	auxin-responsive protein, putative, auxin-induced protein 10A, Glycine max., PIR2:JQ1099	0.481921	NS
De-regulated in leaves only	At2g04080	MATE efflux family protein, similar to hypothetical protein GB:AAC27412; contains Pfam profile PF01554: Uncharacterized membrane protein family	0.481889	2.08658
De-regulated in leaves only	At1g65150	meprin and TRAF homology domain-containing protein / MATH domain-containing protein, similar to ubiquitin-specific protease 12 (Arabidopsis thaliana) GI:11993471; contains Pfam profile PF00917: MATH domain	0.481884	NS
De-regulated in leaves only	At3g19370	expressed protein	0.481003	NS
De-regulated in leaves only	At4g03230	S-locus lectin protein kinase family protein, contains Pfam domins, PF00069: Protein kinase domain, PF00954: S-locus glycoprotein family and PF01453: Lectin (probable mannose binding)	0.480415	NS
De-regulated in leaves only	At5g23210	SCPL34__similar to serine carboxypeptidase S10 family protein [Arabidopsis thaliana] (TAIR:At5g08260.1); similar to OSJNBa0038O10.8 [Oryza sativa (japonica cultivar-group)] (GB:XP_473236.1); contains InterPro domain Esterase/lipase/thioesterase (InterPro:IPR000379); contains InterPro domain Serine carboxypeptidase (S10) (InterPro:IPR001563)	0.480328	2.24372
De-regulated in leaves only	At3g01060	similar to alr0301 [Nostoc sp. PCC 7120] (GB:BAB77825.1)	0.480056	3.70657
De-regulated in leaves only	At3g58790	glycosyl transferase family 8 protein, contains Pfam profile: PF01501 glycosyl transferase family 8; general stress protein gspA, Bacillus subtilis, PIR:S16423	0.479773	NS
De-regulated in leaves only	At5g38050	hypothetical protein	0.479541	NS
De-regulated in leaves only	At5g20150	SPX (SYG1/Pho81/XPR1) domain-containing protein, similar to PHO1 protein (Arabidopsis thaliana) GI:20069032; contains Pfam profile PF03105: SPX domain	0.479503	NS
De-regulated in leaves only	At2g28890	PLL4__protein phosphatase 2C family protein / PP2C family protein, similar to protein phosphatase-2c (GI:3608412) (Mesembryanthemum crystallinum); contains Pfam PF00481 : Protein phosphatase 2C domain	0.479374	2.47034
De-regulated in leaves only	At5g41120	esterase/lipase/thioesterase family protein, contains Interpro entry IPR000379	0.478632	NS
De-regulated in leaves only	At3g05030	NHX2_ATNHX2__sodium proton exchanger, putative (NHX2), similar to sodium proton exchanger Nhx1 GB:AAD16946 (Arabidopsis thaliana); Member of The Monovalent Cation:Proton Antiporter (CPA1) Family, PMID:11500563	0.478566	3.33015
De-regulated in leaves only	At2g25490	EBF1_FBL6__F-box family protein (FBL6), contains similarity to grr1 GI:2407790 from (Glycine max)	0.478182	NS
De-regulated in leaves only	At3g23000	CIPK7_ATSR2_ATSRPK1_PKS7__CBL-interacting protein kinase 7 (CIPK7), identical to CBL-interacting protein kinase 7 (Arabidopsis thaliana) gi:13249113:gb:AAK16682; contains Pfam profiles PF00069: Protein kinase domain and PF03822: NAF domain; identical to cDNA CBL-interacting protein kinase 7 (CIPK7) GI:13249112	0.477924	NS
De-regulated in leaves only	At5g66910	disease resistance protein (CC-NBS-LRR class), putative, domain signature CC-NBS-LRR exists, suggestive of a disease resistance protein.	0.47758	NS
De-regulated in leaves only	At1g69870	proton-dependent oligopeptide transport (POT) family protein, contains Pfam profile: PF00854 POT family	0.477271	5.31993
De-regulated in leaves only	At1g51170	protein kinase family protein	0.477225	NS
De-regulated in leaves only	At1g59710	expressed protein, contains Pfam profile: PF04601 protein of unknown function (DUF569	0.476924	NS
De-regulated in leaves only	At5g11970	expressed protein	0.476896	NS
De-regulated in leaves only	At1g72450	expressed protein	0.476748	NS
De-regulated in leaves only	At1g64530	RWP-RK domain-containing protein, similar to nodule inception protein (Lotus japonicus) GI:6448579; contains Pfam profile: PF02042 RWP-RK domain	0.475692	NS
De-regulated in leaves only	At4g15450	senescence/dehydration-associated protein-related, similar to senescence-associated protein 12 (Hemerocallis hybrid cultivar) gi:3551958:gb:AAC34857; similar to early-responsive to dehydration stress ERD7 protein (Arabidopsis thaliana) gi:15320412:dbj:BAB63916	0.475555	NS
De-regulated in leaves only	At3g26570	PHT2;1_ORF02__phosphate transporter family protein, contains Pfam profile: PF01384 phosphate transporter family	0.475018	NS
De-regulated in leaves only	At4g37682		0.474985	NS
De-regulated in leaves only	At1g78100	F-box family protein, contains F-box domain Pfam:PF00646	0.474963	NS
De-regulated in leaves only	At5g20190	expressed protein	0.474378	2.61922
De-regulated in leaves only	At5g22140	pyridine nucleotide-disulphide oxidoreductase family protein, contains Pfam profile PF00070 Pyridine nucleotide-disulphide oxidoreductase domain	0.473545	NS
De-regulated in leaves only	At1g21250	WAK1_PRO25__wall-associated kinase 1 (WAK1), identical to wall-associated kinase 1 (Arabidopsis thaliana) GI:3549626; expressed in leaves and stems & induced by pathogen infection (PMID:10380805)	0.472698	5.01366
De-regulated in leaves only	At1g78060	glycosyl hydrolase family 3 protein, similar to xylosidase GI:2102655 from (Aspergillus niger)	0.471676	NS
De-regulated in leaves only	At3g50750	brassinosteroid signalling positive regulator-related, contains similarity to BZR1 protein (Arabidopsis thaliana) gi:20270971:gb:AAM18490	0.471606	NS
De-regulated in leaves only	At1g64970	G-TMT_TMT1_VTE4__expressed protein	0.470343	7.27268
De-regulated in leaves only	At5g52810	ornithine cyclodeaminase/mu-crystallin family protein, contains Pfam PF02423: Ornithine cyclodeaminase/mu-crystallin family	0.469755	NS
De-regulated in leaves only	At2g39210	nodulin family protein, similar to nodulin-like protein (Arabidopsis thaliana) GI:3329368, nodule-specific protein Nlj70 (Lotus japonicus) GI:3329366	0.469734	NS
De-regulated in leaves only	At5g36002		0.469307	NS
De-regulated in leaves only	At5g17000	NADP-dependent oxidoreductase, putative, strong similarity to probable NADP-dependent oxidoreductase (zeta-crystallin homolog) P1 (SP:Q39172)(gi:886428) and P2 (SP:Q39173)(gi:886430), Arabidopsis thaliana	0.469292	8.9295
De-regulated in leaves only	At1g17430	hydrolase, alpha/beta fold family protein, low similarity to SP:Q02104 Lipase 1 precursor (EC 3.1.1.3) (Triacylglycerol lipase) {Psychrobacter immobilis}, contains Pfam profile PF00561: hydrolase, alpha/beta fold family	0.468449	NS
De-regulated in leaves only	At4g25434	ATNUDT10__similar to MutT/nudix family protein [Arabidopsis thaliana] (TAIR:At5g47650.1); similar to OSJNBa0079A21.19 [Oryza sativa (japonica cultivar-group)] (GB:XP_473408.1); contains InterPro domain Anti-sense to fibroblast growth factor protein GFG (InterPro:IPR003293); contains InterPro domain NUDIX hydrolase (InterPro:IPR000086)	0.466465	3.65894
De-regulated in leaves only	At2g34300	dehydration-responsive protein-related, similar to early-responsive to dehydration stress ERD3 protein (Arabidopsis thaliana) GI:15320410; contains Pfam profile PF03141: Putative methyltransferase	0.466318	NS
De-regulated in leaves only	At3g61460	BRH1__zinc finger (C3HC4-type RING finger) family protein (BRH1), identical to BRH1 RING finger protein (Arabidopsis thaliana) GI:4689366; identical to cDNA BRH1 RING finger protein, GI:4689365	0.465999	NS
De-regulated in leaves only	At2g04850	auxin-responsive protein-related, related to auxin-induced protein AIR12 GI:11357190 (Arabidopsis thaliana)	0.4654	NS
De-regulated in leaves only	At5g03520	Ras-related GTP-binding protein, putative, similar to GTP-binding protein GI:871508 from (Pisum sativum)	0.464959	NS
De-regulated in leaves only	At5g65280	lanthionine synthetase C-like family protein, contains Pfam domain, PF05147: Lanthionine synthetase C-like protein	0.464571	NS
De-regulated in leaves only	At2g39420	esterase/lipase/thioesterase family protein, similar to monoglyceride lipase from (Homo sapiens) GI:14594904, (Mus musculus) GI:2632162; contains Interpro entry IPR000379	0.464105	NS
De-regulated in leaves only	At4g21960	PRXR1__peroxidase 42 (PER42) (P42) (PRXR1), identical to SP:Q9SB81 Peroxidase 42 precursor (EC 1.11.1.7) (Atperox P42) (PRXR1) (ATP1a/ATP1b) {Arabidopsis thaliana}	0.463169	NS
De-regulated in leaves only	At1g26208		0.462968	NS
De-regulated in leaves only	At4g17350	expressed protein	0.461657	NS
De-regulated in leaves only	At5g61270	basic helix-loop-helix (bHLH) family protein, contains Pfam profile: PF00010 helix-loop-helix DNA-binding domain	0.460968	NS
De-regulated in leaves only	At1g43650	integral membrane family protein / nodulin MtN21-related, similar to MtN21 GI:2598575 (root nodule development) from (Medicago truncatula)similar to MtN21 GI:2598575 (root nodule development) from (Medicago truncatula)	0.460569	NS
De-regulated in leaves only	At3g15353	MT3__metallothionein protein, putative	0.460096	3.94064
De-regulated in leaves only	At1g64890	integral membrane transporter family protein, contains 11 transmembrane domains; contains Pfam PF03092: BT1 family; contains TIGRFAMS TIGR00788: folate/biopterin transporter	0.459989	NS
De-regulated in leaves only	At2g15970	COR413-PM1_ATCOR413-PM1_FL3-5A3_WCOR413_WCOR413-LIKE__cold-acclimation protein, putative (FL3-5A3), similar to cold acclimation WCOR413-like protein gamma form (Hordeum vulgare) gi:18449100:gb:AAL69988; similar to stress-regulated protein SAP1 (Xerophyta viscosa) gi:21360378:gb:AAM47505; identical to cDNA cold acclimation protein WCOR413-like protein alpha form GI:10121840, cold acclimation prote…	0.459417	NS
De-regulated in leaves only	At2g27820	prephenate dehydratase family protein	0.458373	NS
De-regulated in leaves only	At4g39210	APL3__glucose-1-phosphate adenylyltransferase large subunit 3 (APL3) / ADP-glucose pyrophosphorylase, identical to SP:P55231	0.45831	2.12052
De-regulated in leaves only	At5g64572		0.457947	NS
De-regulated in leaves only	At5g64240	latex-abundant family protein (AMC3) / caspase family protein, contains similarity to latex-abundant protein (Hevea brasiliensis) gb:AAD13216; contains Pfam profile PF00656: ICE-like protease (caspase) p20 domain	0.456238	NS
De-regulated in leaves only	At1g79620	leucine-rich repeat transmembrane protein kinase, putative, similar to receptor protein kinase GI:1389566 from (Arabidopsis thaliana)	0.456131	NS
De-regulated in leaves only	At1g18390	protein kinase family protein, contains protein kinase domain, Pfam:PF00069	0.45606	2.44662
De-regulated in leaves only	At5g20830	SUS1_ASUS1_ATSUS1__sucrose synthase / sucrose-UDP glucosyltransferase (SUS1), identical to SP:P49040 Sucrose synthase (EC 2.4.1.13) (Sucrose-UDP glucosyltransferase) {Arabidopsis thaliana}	0.455395	2.66557
De-regulated in leaves only	At5g50100	expressed protein, contains Pfam domain PF04134: Protein of unknown function, DUF393	0.455208	4.81255
De-regulated in leaves only	At1g06640	2-oxoglutarate-dependent dioxygenase, putative, similar to 2A6 (GI:599622) and tomato ethylene synthesis regulatory protein E8 (SP:P10967); contains Pfam profile: PF00671 Iron/Ascorbate oxidoreductase family	0.454565	NS
De-regulated in leaves only	At5g55620	expressed protein, similar to unknown protein (gb:AAF04428.1)	0.454405	NS
De-regulated in leaves only	At3g49510	F-box family protein, contains Pfam PF00646: F-box domain; contains TIGRFAM TIGR01640 : F-box protein interaction domain	0.454294	NS
De-regulated in leaves only	At1g29050	expressed protein, similar to hypothetical protein GB:AAB67625 GI:2342727 from (Arabidopsis thaliana)	0.453818	4.45578
De-regulated in leaves only	At1g33800	expressed protein, contains Pfam profile PF04669: Protein of unknown function (DUF579)	0.453748	NS
De-regulated in leaves only	At5g10180	AST68_SULTR2;1__sulfate transporter, identical to sulfate transporter (Arabidopsis thaliana) GI:2114104	0.453585	2.77566
De-regulated in leaves only	At4g01450	nodulin MtN21 family protein, similar to MtN21 GI:2598575 (root nodule development) from (Medicago truncatula)	0.453514	5.76416
De-regulated in leaves only	At2g18230	inorganic pyrophosphatase (soluble) (PPA) / pyrophosphate phospho-hydrolase / PPase, nearly identical to SP:P21216 Soluble inorganic pyrophosphatase (EC 3.6.1.1) (Pyrophosphate phospho- hydrolase) (PPase) {Arabidopsis thaliana}	0.453115	3.03849
De-regulated in leaves only	At1g21270	WAK2__wall-associated kinase 2 (WAK2), identical to wall-associated kinase 2 (Arabidopsis thaliana) GI:4826399; induced by salicylic acid or INA (PMID:10380805)	0.452192	NS
De-regulated in leaves only	At1g78670	ATGGH3__gamma-glutamyl hydrolase, putative / gamma-Glu-X carboxypeptidase, putative / conjugase, putative, similar to gamma glutamyl hydrolase GI:1679658 SP:P93164 from (Glycine max)	0.451754	6.61771
De-regulated in leaves only	At5g14940	proton-dependent oligopeptide transport (POT) family protein, contains Pfam profile: PF00854 POT family	0.451637	6.52471
De-regulated in leaves only	At1g68760	ATNUDT1__MutT/nudix family protein, similar to SP:Q58549 ADP-ribose pyrophosphatase (EC 3.6.1.13) {Methanococcus jannaschii}; contains Pfam profile PF00293: NUDIX domain	0.451582	NS
De-regulated in leaves only	At2g16050	DC1 domain-containing protein, contains Pfam domain PF03107: DC1 domain	0.450841	NS
De-regulated in leaves only	At3g09440	heat shock cognate 70 kDa protein 3 (HSC70-3) (HSP70-3), identical to SP:O65719 Heat shock cognate 70 kDa protein 3 (Hsc70.3) {Arabidopsis thaliana}	0.449953	NS
De-regulated in leaves only	At4g32290	expressed protein, contains Pfam profile PF03267: Arabidopsis protein of unknown function, DUF266	0.449929	NS
De-regulated in leaves only	At3g07990	SCPL27__serine carboxypeptidase S10 family protein, similar to serine carboxypeptidase II (CP-MII) GB:CAA70815 (Hordeum vulgare)	0.448637	NS
De-regulated in leaves only	At2g24762	expressed protein	0.448417	2.8625
De-regulated in leaves only	At1g03130	photosystem I reaction center subunit II, chloroplast, putative / photosystem I 20 kDa subunit, putative / PSI-D, putative (PSAD2), similar to SP:P12353 Photosystem I reaction center subunit II, chloroplast precursor (Photosystem I 20 kDa subunit) (PSI-D) {Spinacia oleracea}; contains Pfam profile PF02531: PsaD	0.448389	NS
De-regulated in leaves only	At1g49750	leucine-rich repeat family protein, contains leucine-rich repeats, Pfam:PF00560	0.447822	NS
De-regulated in leaves only	At4g19420	pectinacetylesterase family protein, contains Pfam profile: PF03283 pectinacetylesterase	0.447684	7.65079
De-regulated in leaves only	At5g59080	expressed protein	0.447561	3.91363
De-regulated in leaves only	At3g43800	ATGSTU27__glutathione S-transferase, putative, glutathione transferase, papaya, PIR:T09781	0.446457	NS
De-regulated in leaves only	At3g03250	UGP__Is thought to encodes a cytosolic UDP-glucose pyrophosphorylase with strong similarity to UTP--glucose-1-phosphate uridylyltransferase (SwissProt P19595, EC 2.7.7.9, UDP-glucose pyrophosphorylase Solanum tuberosum).	0.446162	NS
De-regulated in leaves only	At5g19140	auxin/aluminum-responsive protein, putative, strong similarity to auxin down-regulated protein ARG10 (Vigna radiata) GI:2970051, wali7 (aluminum-induced protein) (Triticum aestivum) GI:451193	0.44592	4.483
De-regulated in leaves only	At1g12480	C4-dicarboxylate transporter/malic acid transport family protein, contains Pfam profile PF03595: C4-dicarboxylate transporter/malic acid transport protein	0.445307	NS
De-regulated in leaves only	At1g73670	ATMPK15__mitogen-activated protein kinase, putative / MAPK, putative (MPK15), similar to mitogen-activated protein kinase GB:A56042 (Dictyostelium discoideum); mitogen-activated protein kinase (MAPK)(AtMPK15), PMID:12119167; contains Pfam profile: PF00069 Eukaryotic protein kinase domain	0.444966	3.82385
De-regulated in leaves only	At4g23290	protein kinase family protein, contains Pfam domain PF00069: Protein kinase domain	0.444047	NS
De-regulated in leaves only	At5g44530	subtilase family protein, contains Pfam profiles: PF00082 subtilase family	0.443731	NS
De-regulated in leaves only	At4g24480	serine/threonine protein kinase, putative, similar to serine/threonine-protein kinase CTR1 (Arabidopsis thaliana) SWISS-PROT:Q05609	0.443311	NS
De-regulated in leaves only	At4g38230	CPK26__calcium-dependent protein kinase, putative / CDPK, putative, calmodulin-domain protein kinase CDPK isoform 6 (Arabidopsis thaliana) gi:1399275:gb:AAB03246; contains protein kinase domain, Pfam:PF00069; contains EF hand domain (calcium-binding EF-hand), Pfam:PF00036, INTERPRO:IPR002048	0.442655	NS
De-regulated in leaves only	At4g30490	AFG1-like ATPase family protein, contains Pfam profile: PF03969 AFG1-like ATPase	0.442388	NS
De-regulated in leaves only	At1g58590		0.442272	NS
De-regulated in leaves only	At1g59970	matrixin family protein, similar to SP:P29136 Metalloendoproteinase 1 precursor (EC 3.4.24.-) (SMEP1) {Glycine max}; contains InterPro accession IPR001818: Matrixin	0.440412	NS
De-regulated in leaves only	At1g13110	CYP71B7__cytochrome P450 71B7 (CYP71B7), identical to (SP:Q96514) cytochrome P450 71B7 (Arabidopsis thaliana); PF:00067 Cytochrome P450 family. ESTs gb:T44875, gb:T04814, gb:R65111, gb:T44310 and gb:T04541 come from this gene; identical to cDNA cytochrome P450 GI:1523795, ATCYP71B7	0.440117	NS
De-regulated in leaves only	At2g41475		0.439822	NS
De-regulated in leaves only	At2g30432	similar to myb family transcription factor (TRIPTYCHON) [Arabidopsis thaliana] (TAIR:At5g53200.1); similar to werewolf [Cucumis sativus] (GB:AAM23006.1); contains InterPro domain Myb DNA-binding domain (InterPro:IPR001005)	0.439634	NS
De-regulated in leaves only	At3g05640	protein phosphatase 2C, putative / PP2C, putative, similar to protein phosphatase-2C GB:AAC36699 from (Mesembryanthemum crystallinum)	0.438891	NS
De-regulated in leaves only	At3g45940	alpha-xylosidase, putative, strong similarity to alpha-xylosidase precursor GI:4163997 from (Arabidopsis thaliana)	0.438609	NS
De-regulated in leaves only	At5g18240	MYR1__myb family transcription factor, contains Pfam profile: PF00249 myb-like DNA-binding domain	0.438314	NS
De-regulated in leaves only	At4g22840	bile acid:sodium symporter family protein, low similarity to SP:Q12908 Ileal sodium/bile acid cotransporter {Homo sapiens}; contains Pfam profile PF01758: Sodium Bile acid symporter family	0.438192	NS
De-regulated in leaves only	At3g04210	disease resistance protein (TIR-NBS class), putative, domain signature TIR-NBS exists, suggestive of a disease resistance protein.	0.43573	2.83115
De-regulated in leaves only	At1g67860	expressed protein	0.435332	5.4829
De-regulated in leaves only	At5g54860	integral membrane transporter family protein, contains 10 transmembrane domains; contains Pfam PF03092: BT1 family; contains TIGRFAMS TIGR00788: folate/biopterin transporter; similar to high affinity folic acid/methotrexate transporter 5 (GI:21898554) (Leishmania tarentolae)	0.434281	NS
De-regulated in leaves only	At1g09390	GDSL-motif lipase/hydrolase family protein, Similar to early nodulin ENOD8 (Medicago sativa) GI:304037, lanatoside 15`-O-acetylesterase (Digitalis lanata) GI:3688284, elicitor-induced glycoprotein iEP4 (Daucus carota) GI:1911765; contains InterPro Entry IPR001087 Lipolytic enzyme, G-D-S-L family	0.433783	NS
De-regulated in leaves only	At5g40670	PQ-loop repeat family protein / transmembrane family protein, similar to SP:O60931 Cystinosin {Homo sapiens}; contains Pfam profile PF04193: PQ loop repeat	0.432993	2.36347
De-regulated in leaves only	At3g46110	expressed protein	0.432991	NS
De-regulated in leaves only	At1g22650	beta-fructofuranosidase, putative / invertase, putative / saccharase, putative / beta-fructosidase, putative, similar to neutral invertase (Daucus carota) GI:4200165; contains Pfam profile PF04853: Plant neutral invertase	0.432476	2.22356
De-regulated in leaves only	At4g23790	expressed protein, many other Arabidopsis putative proteins	0.432404	NS
De-regulated in leaves only	At3g53830	regulator of chromosome condensation (RCC1) family protein / UVB-resistance protein-related, contains Pfam PF00415 : Regulator of chromosome condensation (RCC1); similar to UVB-resistance protein UVR8 (GIi;10177674) (Arabidopsis thaliana)	0.432403	NS
De-regulated in leaves only	At4g26990	expressed protein	0.431217	NS
De-regulated in leaves only	At5g39760	zinc finger homeobox protein-related / ZF-HD homeobox protein-related, predicted proteins, Arabidopsis thaliana	0.431121	NS
De-regulated in leaves only	At4g34060	similar to HhH-GPD base excision DNA repair family protein (ROS1) [Arabidopsis thaliana] (TAIR:At2g36490.1); similar to unknow protein [Oryza sativa (japonica cultivar-group)] (GB:AAU44279.1); contains InterPro domain HhH-GPD (InterPro:IPR003265)	0.428655	2.62875
De-regulated in leaves only	At5g15490	UDP-glucose 6-dehydrogenase, putative, very strong similarity to SP:Q96558 UDP-glucose 6-dehydrogenase (EC 1.1.1.22) (UDP-Glc dehydrogenase) (UDP-GlcDH) (UDPGDH) {Glycine max}; contains Pfam profiles PF03721: UDP-glucose/GDP-mannose dehydrogenase family NAD binding domain, PF00984: UDP-glucose/GDP-mannose dehydrogenase family central domain, PF03720: UDP-glucose/GDP-mannose dehydrogenase family U…	0.428255	NS
De-regulated in leaves only	At2g46870	DNA-binding protein, putative, similar to DNA-binding proteins from (Arabidopsis thaliana) RAV1 GI:3868857, RAV2 GI:3868859; contains Pfam profile PF02362: B3 DNA binding domain	0.42708	NS
De-regulated in leaves only	At4g12880	plastocyanin-like domain-containing protein	0.427057	NS
De-regulated in leaves only	At4g38550	expressed protein	0.426925	NS
De-regulated in leaves only	At5g58070	lipocalin, putative, similar to temperature stress-induced lipocalin (Triticum aestivum) GI:18650668	0.4262	NS
De-regulated in leaves only	At4g31620	transcriptional factor B3 family protein, low similarity to reproductive meristem gene 1 from (Brassica oleracea var. botrytis) GI:3170424, (Arabidopsis thaliana) GI:13604227; contains Pfam profile PF02362: B3 DNA binding domain	0.425891	NS
De-regulated in leaves only	At4g35320	expressed protein, predicted protein, Arabidopsis thaliana	0.425556	2.38002
De-regulated in leaves only	At1g36370	glycine hydroxymethyltransferase, putative / serine hydroxymethyltransferase, putative / serine/threonine aldolase, putative, similar to serine hydroxymethyltransferase (Chlamydomonas reinhardtii) GI:17066746; contains Pfam profile PF00464: serine hydroxymethyltransferase	0.425444	2.33016
De-regulated in leaves only	At1g75280	isoflavone reductase, putative, identical to SP:P52577 Isoflavone reductase homolog P3 (EC 1.3.1.-) {Arabidopsis thaliana}; contains Pfam profile PF02716: isoflavone reductase. Involved in response to oxidative stress.	0.42479	3.77471
De-regulated in leaves only	At2g34510	expressed protein, contains Pfam profile PF04862: Protein of unknown function, DUF642	0.424527	NS
De-regulated in leaves only	At4g00880	auxin-responsive family protein, similar to small auxin up RNA (GI:546362) {Arabidopsis thaliana}	0.423415	2.00959
De-regulated in leaves only	At3g15115	expressed protein	0.423388	NS
De-regulated in leaves only	At4g14680	APS3__sulfate adenylyltransferase 3 / ATP-sulfurylase 3 (APS3), identical to ATP sulfurylase (APS3) (Arabidopsis thaliana) GI:1575327	0.42327	NS
De-regulated in leaves only	At3g51660	macrophage migration inhibitory factor family protein / MIF family protein, contains Pfam profile: PF01187 Macrophage migration inhibitory factor family(MIF)	0.421088	NS
De-regulated in leaves only	At4g24015	zinc finger (RING-H2 type) protein-related, low similarity to RING-H2 zinc finger protein ATL4 (Arabidopsis thaliana) GI:4928399	0.420853	NS
De-regulated in leaves only	At3g62780	C2 domain-containing protein, contains similarity to shock protein SRC2 (Glycine max) gi:2055230:dbj:BAA19769 ; contains Pfam profile PF00168:C2 domain	0.418814	NS
De-regulated in leaves only	At5g60860	Ras-related GTP-binding protein, putative, similar to GTP-binding protein GI:303742 from (Pisum sativum)	0.418513	NS
De-regulated in leaves only	At4g01920	DC1 domain-containing protein, similar to A. thaliana CHP-rich proteins	0.416659	NS
De-regulated in leaves only	At2g42320	nucleolar protein gar2-related, contains weak similarity to Swiss-Prot:P41891 protein gar2 (Schizosaccharomyces pombe)	0.415769	NS
De-regulated in leaves only	At5g61660	glycine-rich protein	0.415614	NS
De-regulated in leaves only	At3g50740	UGT72E1__UGT72E1 is an UDPG:coniferyl alcohol glucosyltransferase which specifically glucosylates sinapyl- and coniferyl aldehydes. The enzyme is thought to be involved in lignin metabolism.	0.414103	3.37586
De-regulated in leaves only	At5g23810	AAP7_AAP8__amino acid transporter family protein, similar to amino acid carrier (Ricinus communis) GI:3293031; contains Pfam profile PF01490: Transmembrane amino acid transporter protein	0.413291	NS
De-regulated in leaves only	At3g45860	receptor-like protein kinase, putative, similar to receptor-like protein kinase 4 (gi:13506745), 5 (gi:13506747), and 6 (gi:13506749) from Arabidopsis thaliana; contains Pfam protein kinase domain PF00069	0.412591	6.9447
De-regulated in leaves only	At4g39800	MI-1-P SYNTHASE__inositol-3-phosphate synthase isozyme 1 / myo-inositol-1-phosphate synthase 1 / MI-1-P synthase 1 / IPS 1, identical to SP:P42801 Inositol-3-phosphate synthase isozyme 1 (EC 5.5.1.4) (Myo-inositol-1- phosphate synthase 1) (MI-1-P synthase 1) (IPS 1) {Arabidopsis thaliana}	0.411044	2.29909
De-regulated in leaves only	At5g64850	expressed protein	0.410998	NS
De-regulated in leaves only	At2g18860	syntaxin family protein, similar to Syntaxin 61 (AtSYP61) (Osmotic stess-sensitive mutant 1) (Swiss-Prot:Q946Y7) (Arabidopsis thaliana)	0.410836	NS
De-regulated in leaves only	At4g24450	ATGWD2_GWD3_PWD__similar to starch excess protein (SEX1) [Arabidopsis thaliana] (TAIR:At1g10760.1); similar to starch associated protein R1 [Solanum tuberosum] (GB:AAK11735.1); similar to R1 [Citrus reticulata] (GB:AAM18228.1); similar to SPR1b [Ostreococcus tauri] (GB:AAS88899.1)	0.410331	NS
De-regulated in leaves only	At5g21482	cytokinin oxidase, putative (CKX5), contains Pfam profile: PF01565 FAD binding domain; identical to cytokinin oxidase (CKX5) (Arabidopsis thaliana) gi:11120514:gb:AAG30908; similar to Swiss-Prot:Q9LTS3 cytokinin oxidase 3 precursor (CKO 3)(Arabidopsis thaliana)	0.409596	NS
De-regulated in leaves only	At2g18350	zinc finger homeobox family protein / ZF-HD homeobox family protein	0.409326	NS
De-regulated in leaves only	At5g25610	RD22__dehydration-responsive protein (RD22), identical to SP:Q08298 Dehydration-responsive protein RD22 precursor {Arabidopsis thaliana}	0.408574	13.4322
De-regulated in leaves only	At1g67870	glycine-rich protein, contains non-consensus GG donor splice site at exon2; modeled to est match.	0.407662	NS
De-regulated in leaves only	At5g01210	transferase family protein, contains Pfam profile PF02458 transferase family	0.407548	NS
De-regulated in leaves only	At3g47510	expressed protein	0.406563	NS
De-regulated in leaves only	At3g28007	nodulin MtN3 family protein, contains Pfam PF03083 MtN3/saliva family; similar to LIM7 GI:431154 (induced in meiotic prophase in lily microsporocytes) from (Lilium longiflorum)	0.406392	NS
De-regulated in leaves only	At2g41870	remorin family protein, contains Pfam domain, PF03763: Remorin, C-terminal region	0.405335	3.51618
De-regulated in leaves only	At4g38740	ROC1__peptidyl-prolyl cis-trans isomerase / cyclophilin / rotamase / cyclosporin A-binding protein (ROC1), identical to SP:P34790 Peptidyl-prolyl cis-trans isomerase (EC 5.2.1.8) (PPIase) (Rotamase) (Cyclophilin) (Cyclosporin A-binding protein) {Arabidopsis thaliana}	0.404991	3.07027
De-regulated in leaves only	At3g10120	expressed protein	0.40455	NS
De-regulated in leaves only	At5g13200	GRAM domain-containing protein / ABA-responsive protein-related, similar to ABA-responsive protein (Hordeum vulgare) GI:4103635; contains Pfam profile PF02893: GRAM domain	0.404401	4.16445
De-regulated in leaves only	At2g40435	expressed protein	0.404177	NS
De-regulated in leaves only	At1g29720	protein kinase family protein, contains eukaryotic protein kinase domain, INTERPRO:IPR000719	0.398068	NS
De-regulated in leaves only	At4g18030	dehydration-responsive family protein, similar to early-responsive to dehydration stress ERD3 protein (Arabidopsis thaliana) GI:15320410; contains Pfam profile PF03141: Putative methyltransferase	0.398024	NS
De-regulated in leaves only	At5g49500	signal recognition particle 54 kDa protein 2 / SRP54 (SRP-54B), identical to SP:P49966 Signal recognition particle 54 kDa protein 2 (SRP54) {Arabidopsis thaliana}	0.397872	NS
De-regulated in leaves only	At4g01750	expressed protein, T15B16.8	0.397856	NS
De-regulated in leaves only	At1g08890	sugar transporter family protein, similar to sugar-porter family proteins 1 and 2 (Arabidopsis thaliana) GI:14585699, GI:14585701; contains Pfam profile PF00083: major facilitator superfamily protein	0.396944	2.75471
De-regulated in leaves only	At5g46240	KAT1__inward rectifying potassium channel (KAT1), identical to K+ channel (Arabidopsis thaliana) gi:1165000:emb:CAA63601; Shaker-type channel (1P/6TM), PMID:11500563	0.396477	NS
De-regulated in leaves only	At1g22710	SUC2_ATSUC2_SUT1__sucrose transporter / sucrose-proton symporter (SUC2), nearly identical to sucrose-proton symporter SUC2 (Arabidopsis thaliana) GI:407092	0.395577	NS
De-regulated in leaves only	At5g49660	leucine-rich repeat transmembrane protein kinase, putative, contains leucine rich repeat (LRR) domains, Pfam:PF00560; contains protein kinase domain, Pfam:PF00069	0.395243	NS
De-regulated in leaves only	At1g04250	AXR3_IAA17__auxin-responsive protein / indoleacetic acid-induced protein 17 (IAA17), Identical to SP:P93830 Auxin-responsive protein IAA17 (Indoleacetic acid-induced protein 17) {Arabidopsis thaliana}; ESTs gb:H36782 and gb:F14074 come from this gene	0.395189	2.99803
De-regulated in leaves only	At3g19620	glycosyl hydrolase family 3 protein, similar to beta-xylosidase A GB:BAA28267 from (Aspergillus oryzae)	0.394899	NS
De-regulated in leaves only	At3g50650	scarecrow-like transcription factor 7 (SCL7)	0.394036	NS
De-regulated in leaves only	At3g48970	copper-binding family protein, similar to copper homeostasis factor gi:3168840 from Arabidopsis thaliana; contains Pfam heavy-metal-associated domain PF00403	0.393962	NS
De-regulated in leaves only	At3g23820	GAE6__NAD-dependent epimerase/dehydratase family protein, similar to nucleotide sugar epimerase from Vibrio vulnificus GI:3093975 (PID:g3093975), WbnF (Escherichia coli) GI:5739472, CAPI protein {Staphylococcus aureus} SP:P39858; contains Pfam profile: PF01370 NAD dependent epimerase/dehydratase family	0.393677	NS
De-regulated in leaves only	At5g10570	basic helix-loop-helix (bHLH) family protein, bHLH transcription factor, Arabidopsis thaliana, EMBL:AC005167	0.392028	2.55121
De-regulated in leaves only	At5g61340	expressed protein	0.390283	NS
De-regulated in leaves only	At4g05320	UBQ10__polyubiquitin (UBQ10) (SEN3), senescence-associated protein; identical to GI:870791	0.389927	2.37645
De-regulated in leaves only	At3g14200	DNAJ heat shock N-terminal domain-containing protein, low similarity to SP:O75190:DJB6_HUMAN DnaJ homolog subfamily B member 6 (Heat shock protein J2) {Homo sapiens}; contains Pfam profile PF00226 DnaJ domain	0.389743	NS
De-regulated in leaves only	At3g54030	protein kinase family protein, contains protein kinase domain, Pfam:PF00069	0.388838	NS
De-regulated in leaves only	At3g23090	expressed protein	0.38798	NS
De-regulated in leaves only	At4g16000	expressed protein	0.386511	5.52696
De-regulated in leaves only	At1g22900	similar to disease resistance-responsive family protein [Arabidopsis thaliana] (TAIR:At5g42500.1); similar to At5g42500 [Oryza sativa (japonica cultivar-group)] (GB:AAX96290.1); contains InterPro domain Plant disease resistance response protein (InterPro:IPR004265)	0.38492	NS
De-regulated in leaves only	At1g15670	kelch repeat-containing F-box family protein, similar to SP:Q9ER30 Kelch-related protein 1 (Sarcosin) {Rattus norvegicus}; contains Pfam profiles PF01344: Kelch motif, PF00646: F-box domain	0.384786	NS
De-regulated in leaves only	At4g21215	expressed protein	0.38231	NS
De-regulated in leaves only	At2g38740	haloacid dehalogenase-like hydrolase family protein, similar to SP:P71447 Beta-phosphoglucomutase (EC 5.4.2.6) {Lactococcus lactis}; contains InterPro accession IPR005834: Haloacid dehalogenase-like hydrolase	0.382171	2.83347
De-regulated in leaves only	At4g01480	inorganic pyrophosphatase, putative (soluble) / pyrophosphate phospho-hydrolase, putative / PPase, putative, strong similarity to SP:Q43187 Soluble inorganic pyrophosphatase (EC 3.6.1.1) (Pyrophosphate phospho- hydrolase) (PPase) {Solanum tuberosum}; contains Pfam profile PF00719: inorganic pyrophosphatase	0.381938	2.97074
De-regulated in leaves only	At1g22360	UDP-glucoronosyl/UDP-glucosyl transferase family protein, contains Pfam profile: PF00201 UDP-glucoronosyl and UDP-glucosyl transferase	0.381909	NS
De-regulated in leaves only	At5g53120	SPDS3_SPMS__spermidine synthase, putative / putrescine aminopropyltransferase, putative, similar to SP:O82147 Spermidine synthase (EC 2.5.1.16) (Putrescine aminopropyltransferase) (SPDSY) {Coffea arabica}; contains Pfam profile PF01564: Spermine/spermidine synthase	0.381442	4.02625
De-regulated in leaves only	At3g09540	pectate lyase family protein, simliar to style development-specific protein 9612 SP:P24396 from (Lycopersicon esculentum)	0.380972	NS
De-regulated in leaves only	At2g32340	TraB family protein, contains Pfam domain PF01963: TraB family	0.380895	2.23275
De-regulated in leaves only	At3g56400	WRKY70_ATWRKY70__WRKY family transcription factor, DNA-binding protein 4 WRKY4 - Nicotiana tabacum, EMBL:AF193771	0.380264	NS
De-regulated in leaves only	At2g41290	strictosidine synthase family protein, similar to strictosidine synthase (Rauvolfia serpentina)(SP:P15324); contains strictosidine synthase domain PF03088	0.377737	4.69465
De-regulated in leaves only	At1g28610	GDSL-motif lipase, putative, similar to lipase (Arabidopsis thaliana) GI:1145627; contains Pfam profile: PF00657 Lipase/Acylhydrolase with GDSL-like motif	0.377339	2.09547
De-regulated in leaves only	At1g72360	encodes a member of the ERF (ethylene response factor) subfamily B-2 of ERF/AP2 transcription factor family. The protein contains one AP2 domain. There are 5 members in this subfamily including RAP2.2 AND RAP2.12.	0.377141	NS
De-regulated in leaves only	At5g45820	CIPK20_PKS18__CBL-interacting protein kinase 20 (CIPK20), identical to CBL-interacting protein kinase 20 (Arabidopsis thaliana) gi:14486384:gb:AAK61493	0.376982	8.78047
De-regulated in leaves only	At1g07090	expressed protein, contains Pfam profile PF04852: Protein of unknown function (DUF640)	0.375973	NS
De-regulated in leaves only	At1g77920	bZIP family transcription factor, contains Pfam profile: PF00170 bZIP transcription factor	0.375897	3.94133
De-regulated in leaves only	At3g51180	zinc finger (CCCH-type) family protein, contains Pfam domain, PF00642: Zinc finger C-x8-C-x5-C-x3-H type (and similar)	0.375748	NS
De-regulated in leaves only	At5g23870	pectinacetylesterase family protein, contains Pfam profile: PF03283 pectinacetylesterase	0.374071	NS
De-regulated in leaves only	At2g35945		0.373379	2.56444
De-regulated in leaves only	At3g03470	CYP89A9__cytochrome P450, putative, similar to cytochrome P450 89A2 GB:Q42602 (Arabidopsis thaliana)	0.372827	4.99228
De-regulated in leaves only	At3g43600	AAO2__aldehyde oxidase, putative, identical to gi: 3172025; identical to cDNA putative aldehyde oxidase (AO3) mRNA, partial cds GI:2792303	0.37196	NS
De-regulated in leaves only	At3g16800	protein phosphatase 2C, putative / PP2C, putative, similar to protein phosphatase-2C GB:AAC36699 from (Mesembryanthemum crystallinum)	0.371686	3.91243
De-regulated in leaves only	At5g62350	invertase/pectin methylesterase inhibitor family protein / DC 1.2 homolog (FL5-2I22), similar to SP:Q42534 Pectinesterase 2 precursor (EC 3.1.1.11) (Pectin methylesterase 2) (PE 2) {Arabidopsis thaliana}; contains Pfam profile PF04043: Plant invertase/pectin methylesterase inhibitor; FL5-2I22 mRNA for DC 1.2 homolog, partial cds GI:11127598	0.369297	NS
De-regulated in leaves only	At2g40100	LHCB4.3__chlorophyll A-B binding protein (LHCB4.3), identical to Lhcb4:3 protein (Arabidopsis thaliana) GI:4741956; contains Pfam profile: PF00504 chlorophyll A-B binding protein	0.369261	NS
De-regulated in leaves only	At1g29660	GDSL-motif lipase/hydrolase family protein, low similarity to family II lipase EXL1 (Arabidopsis thaliana) GI:15054382; contains InterPro Entry IPR001087 Lipolytic enzyme, G-D-S-L family	0.367192	NS
De-regulated in leaves only	At1g33260	protein kinase family protein, contains Pfam profile: PF00069: Eukaryotic protein kinase domain	0.366985	NS
De-regulated in leaves only	At4g17260	L-lactate dehydrogenase, putative, strong similarity to L-lactate dehydrogenase from Lycopersicon esculentum (GI:1620970, GI:1620972), Hordeum vulgare (SP:P22988, SP:P22989); contains InterPro entry IPR001236: Lactate/malate dehydrogenase	0.366977	NS
De-regulated in leaves only	At5g03120	expressed protein	0.366521	2.69432
De-regulated in leaves only	At1g62800	ASP4__aspartate aminotransferase, cytoplasmic isozyme 2 / transaminase A (ASP4), identical to aspartate aminotransferase, cytoplasmic isozyme 2 SP:P46646 (Arabidopsis thaliana)	0.366353	5.23721
De-regulated in leaves only	At5g53750	similar to CBS domain-containing protein [Arabidopsis thaliana] (TAIR:At4g27460.1); similar to OSJNBb0017I01.11 [Oryza sativa (japonica cultivar-group)] (GB:XP_474370.1); contains InterPro domain CBS domain (InterPro:IPR000644)	0.36386	NS
De-regulated in leaves only	At5g60840	expressed protein, predicted protein, Drosophila melanogaster	0.360988	2.81832
De-regulated in leaves only	At1g12090	ELP__protease inhibitor/seed storage/lipid transfer protein (LTP) family protein, similar to 14 kDa polypeptide (Catharanthus roseus) GI:407410; contains Pfam protease inhibitor/seed storage/LTP family domain PF00234	0.360855	NS
De-regulated in leaves only	At1g76680	OPR1__12-oxophytodienoate reductase (OPR1), identical to 12-oxophytodienoate reductase OPR1 GB:AAC78440 (Arabidopsis thaliana)	0.360108	4.52023
De-regulated in leaves only	At5g58700	phosphoinositide-specific phospholipase C family protein, contains Pfam profile: PF00388 phosphatidylinositol-specific phospholipase C	0.360093	NS
De-regulated in leaves only	At5g28020	ATCYSD2__cysteine synthase, putative / O-acetylserine (thiol)-lyase, putative / O-acetylserine sulfhydrylase, putative, similar to O-acetylserine(thiol) lyase (EC 4.2.99.8) (Brassica juncea) GI:2245144; contains Pfam profile PF00291: Pyridoxal-phosphate dependent enzyme	0.35748	3.59434
De-regulated in leaves only	At2g43200	dehydration-responsive family protein, similar to early-responsive to dehydration stress ERD3 protein (Arabidopsis thaliana) GI:15320410; contains Pfam profile PF03141: Putative methyltransferase	0.35589	2.07015
De-regulated in leaves only	At1g10370	ATGSTU17_GST30_GST30B__glutathione S-transferase, putative (ERD9), similar to glutathione S-transferase TSI-1 (Aegilops tauschii) gi:2190992 gb:AAD10129; similar to ESTs gb:R29860, emb:Z29757, and emb:Z29758; identical to cDNA ERD9 mRNA for glutathione S-transferase, GI:15375407, glutathione S-transferase (Arabidopsis thaliana) GI:15375408	0.355072	3.68587
De-regulated in leaves only	At2g29120	ATGLR2.7_GLR2.7__similar to glutamate receptor family protein (GLR2.8) (GLUR9) [Arabidopsis thaliana] (TAIR:At2g29110.1); similar to glutamate receptor family protein (GLR2.1) (GLR3) [Arabidopsis thaliana] (TAIR:At5g27100.1); similar to glutamate receptor family protein (GLR2.3) [Arabidopsis thaliana] (TAIR:At2g24710.1); similar to glutamate receptor family protein (GLR2.9) [Arabidopsis thaliana]…	0.354581	11.3722
De-regulated in leaves only	At2g21880	Ras-related GTP-binding protein, putative, similar to Ras family GTP-binding protein SP:Q43463 from (Glycine max)	0.354473	NS
De-regulated in leaves only	At2g25510	expressed protein	0.35397	4.2182
De-regulated in leaves only	At4g08870	arginase, putative, similar to Swiss-Prot:P46637 arginase (EC 3.5.3.1) (Arabidopsis thaliana)	0.352389	5.39935
De-regulated in leaves only	At3g48080	lipase class 3 family protein / disease resistance protein-related, similar to disease resistance protein/lipase homolog EDS1 GI:4454567; contains Pfam profile PF01764: Lipase	0.35218	2.61437
De-regulated in leaves only	At5g35490	expressed protein (MRU1), contains Pfam domain, PF04827: Protein of unknown function (DUF635)	0.351384	2.11516
De-regulated in leaves only	At1g26560	glycosyl hydrolase family 1 protein, contains Pfam PF00232 : Glycosyl hydrolase family 1 domain; TIGRFAM TIGR01233: 6-phospho-beta-galactosidase; similar to amygdalin hydrolase isoform AH I precursor (GI:16757966) (Prunus serotina)	0.351231	NS
De-regulated in leaves only	At5g53730	harpin-induced family protein / HIN1 family protein / harpin-responsive family protein, similar to harpin-induced protein hin1 ( GI:1619321) (Nicotiana tabacum);	0.347302	2.22128
De-regulated in leaves only	At3g57780	expressed protein	0.346754	NS
De-regulated in leaves only	At1g65985	expressed protein, contains Pfam profile PF03140: Plant protein of unknown function	0.345864	NS
De-regulated in leaves only	At5g49630	AAP6__amino acid permease 6 (AAP6), identical to amino acid permease 6 (AAP6) (Arabidopsis thaliana) GI:1769887	0.345511	NS
De-regulated in leaves only	At1g45010	expressed protein	0.345192	NS
De-regulated in leaves only	At3g17390	MTO3_SAMS3__S-adenosylmethionine synthetase, putative, similar to S-adenosylmethionine synthetase 2 (Methionine adenosyltransferase 2, AdoMet synthetase 2) (Catharanthus roseus) SWISS-PROT:Q96552	0.343994	NS
De-regulated in leaves only	At2g39850	subtilase family protein, contains similarity to subtilisin-like protease C1 GI:13325079 from (Glycine max)	0.34287	NS
De-regulated in leaves only	At1g26820	RNS3__ribonuclease 3 (RNS3), identical to ribonuclease SP:P42815 Ribonuclease 3 precursor (EC 3.1.27.1) {Arabidopsis thaliana}	0.342544	NS
De-regulated in leaves only	At4g15620	integral membrane family protein, contains TIGRFAM TIGR01569 : plant integral membrane protein TIGR01569; contains Pfam PF04535 : Domain of unknown function (DUF588)	0.342502	NS
De-regulated in leaves only	At1g51805	leucine-rich repeat protein kinase, putative, similar to light repressible receptor protein kinase (Arabidopsis thaliana) gi:1321686:emb:CAA66376; contains leucine rich repeat (LRR) domains, Pfam:PF00560; contains protein kinase domain, Pfam:PF00069	0.341227	NS
De-regulated in leaves only	At2g22190	similar to trehalose-6-phosphate phosphatase, putative [Arabidopsis thaliana] (TAIR:At4g39770.1); similar to putative trehalose-phosphatase [Oryza sativa (japonica cultivar-group)] (GB:XP_482349.1); contains InterPro domain Trehalose-phosphatase (InterPro:IPR003337); contains InterPro domain HAD-superfamily hydrolase, subfamily IIB (InterPro:IPR006379)	0.339059	NS
De-regulated in leaves only	At3g50970	XERO2__dehydrin xero2 (XERO2) / low-temperature-induced protein LTI30 (LTI30), identical to dehydrin Xero 2 (Low-temperature-induced protein LTI30) (Arabidopsis thaliana) SWISS-PROT:P42758	0.337037	7.92394
De-regulated in leaves only	At3g51750	expressed protein	0.336736	NS
De-regulated in leaves only	At1g09310	expressed protein, contains Pfam profile PF04398: Protein of unknown function, DUF538	0.335505	2.48309
De-regulated in leaves only	At3g58990	aconitase C-terminal domain-containing protein, contains Pfam profile PF00694: Aconitase C-terminal domain	0.334336	9.07179
De-regulated in leaves only	At3g52370	beta-Ig-H3 domain-containing protein / fasciclin domain-containing protein, weak similarity to osteoblast specific factor 2 (Homo sapiens) GI:393319; contains Pfam profile PF02469: Fasciclin domain; supporting cDNA gi:26450295:dbj:AK117608.1:	0.334161	NS
De-regulated in leaves only	At2g38360	prenylated rab acceptor (PRA1) family protein, weak similarity to prenylated Rab acceptor 1 (PRA1) (Homo sapiens) GI:4877285; contains Pfam profile PF03208: Prenylated rab acceptor (PRA1)	0.333771	NS
De-regulated in leaves only	At2g22240	inositol-3-phosphate synthase isozyme 2 / myo-inositol-1-phosphate synthase 2 / MI-1-P synthase 2 / IPS 2, identical to SP:Q38862 Myo-inositol-1-phosphate synthase isozyme 2 (EC 5.5.1.4) (MI-1-P synthase 2) (IPS 2) {Arabidopsis thaliana}	0.333495	4.7882
De-regulated in leaves only	At1g03870	FLA9__fasciclin-like arabinogalactan-protein (FLA9), identical to gi_13377784_gb_AAK20861	0.33314	NS
De-regulated in leaves only	At5g09870	CESA5__cellulose synthase, catalytic subunit, putative, similar to gi:2827141 cellulose synthase catalytic subunit (Ath-A), Arabidopsis thaliana	0.331872	NS
De-regulated in leaves only	At3g28857	expressed protein	0.330733	NS
De-regulated in leaves only	At2g12400	expressed protein	0.3298	NS
De-regulated in leaves only	At3g48740	nodulin MtN3 family protein, similar to MtN3 GI:1619602 (root nodule development) from (Medicago truncatula)	0.328638	3.0555
De-regulated in leaves only	At4g27310	zinc finger (B-box type) family protein, zinc-finger protein S3574, Oryza sativa, PIR3:JE0113	0.32848	3.61592
De-regulated in leaves only	At4g35900	FD_FD-1__DNA-binding protein-related, weak similarity to DNA-binding factor gmlip15 (Zea mays) GI:14289167	0.327757	NS
De-regulated in leaves only	At4g01740	DC1 domain-containing protein, similar to T15B16.6 similar to A. thaliana CHP-rich hypothetical proteins encoded by T10M13, GenBank accession number AF001308	0.327623	NS
De-regulated in leaves only	At2g41090	calmodulin-like calcium-binding protein, 22 kDa (CaBP-22), identical to SP:P30187 22 kDa calmodulin-like calcium-binding protein (CABP-22) (Arabidopsis thaliana)	0.325637	NS
De-regulated in leaves only	At5g04230	PAL3__similar to phenylalanine ammonia-lyase 1 (PAL1) [Arabidopsis thaliana] (TAIR:At2g37040.1); similar to phenylalanine ammonia-lyase 2 (PAL2) [Arabidopsis thaliana] (TAIR:At3g53260.1); similar to phenylalanine ammonia-lyase, putative [Arabidopsis thaliana] (TAIR:At3g10340.1); similar to phenylalanine ammonia lyase [Populus balsamifera subsp. trichocarpa x Populus deltoides] (GB:AAQ74878.1); si…	0.325471	NS
De-regulated in leaves only	At3g04030	myb family transcription factor, contains Pfam profile: PF00249 myb-like DNA-binding domain	0.325117	NS
De-regulated in leaves only	At2g37580	zinc finger (C3HC4-type RING finger) family protein, contains Pfam profile: PF00097 zinc finger, C3HC4 type	0.324195	2.51677
De-regulated in leaves only	At4g12910	SCPL20__serine carboxypeptidase S10 family protein, SERINE CARBOXYPEPTIDASE I PRECURSOR - Hordeum vulgare, SWall:CBP1_HORVU	0.322554	NS
De-regulated in leaves only	At1g55760	BTB/POZ domain-containing protein, Interpro IPR000210/ PS50097: BTBB/POZ domain; similar to POZ 56 protein (GI:17483747) (Mus musculus)	0.322246	NS
De-regulated in leaves only	At2g32870	meprin and TRAF homology domain-containing protein / MATH domain-containing protein, similar to ubiquitin-specific protease 12 (Arabidopsis thaliana) GI:11993471; contains Pfam profile PF00917: MATH domain	0.320206	15.5302
De-regulated in leaves only	At4g27560	glycosyltransferase family protein, contains Pfam profile: PF00201 UDP-glucoronosyl and UDP-glucosyl transferase	0.319877	NS
De-regulated in leaves only	At5g10770	chloroplast nucleoid DNA-binding protein, putative, similar to CND41, chloroplast nucleoid DNA binding protein (Nicotiana tabacum) GI:2541876; contains Pfam profile PF00026: Eukaryotic aspartyl protease	0.319454	3.16988
De-regulated in leaves only	At2g12461		0.31908	NS
De-regulated in leaves only	At5g47330	palmitoyl protein thioesterase family protein	0.318402	NS
De-regulated in leaves only	At4g12030	bile acid:sodium symporter family protein, low similarity to SP:Q12908 Ileal sodium/bile acid cotransporter {Homo sapiens}; contains Pfam profile PF01758: Sodium Bile acid symporter family	0.318335	6.00305
De-regulated in leaves only	At4g16740	ATTPS03__terpene synthase/cyclase family protein, similar to myrcene/ocimene synthase (GI:9957293); contains Pfam profile PF01397: Terpene synthase, N-terminal domain; contains Pfam profile PF03936: Terpene synthase family, metal binding domain; identical to cDNA (partial mRNA) E-beta-ocimene synthase GI:30349137	0.31789	NS
De-regulated in leaves only	At4g13495		0.317189	NS
De-regulated in leaves only	At2g46430	ATCNGC3_CNGC3_CNGC3__cyclic nucleotide-regulated ion channel / cyclic nucleotide-gated channel (CNGC3), identical to cyclic nucleotide and calmodulin-regulated ion channel GI:4581201 from (Arabidopsis thaliana)	0.316892	4.14105
De-regulated in leaves only	At5g06820	leucine-rich repeat transmembrane protein kinase, putative	0.31646	NS
De-regulated in leaves only	At4g15070	DC1 domain-containing protein, contains Pfam profile PF03107: DC1 domain	0.315101	NS
De-regulated in leaves only	At3g55760	expressed protein	0.313024	NS
De-regulated in leaves only	At1g28230	PUP1_ATPUP1__purine permease (PUP1), identical to purine permease GI:7620007 from (Arabidopsis thaliana)	0.312276	4.27691
De-regulated in leaves only	At5g44565	expressed protein	0.311784	2.14345
De-regulated in leaves only	At1g14185	glucose-methanol-choline (GMC) oxidoreductase family protein, similar to mandelonitrile lyase from Prunus serotina (SP:P52706, SP:P52707); contains Pfam profile PF00732 GMC oxidoreductase	0.311478	NS
De-regulated in leaves only	At5g67180	AP2 domain-containing transcription factor, putative, similar to (SP:P47927) Floral homeotic protein APETALA2. (Mouse-ear cress) {Arabidopsis thaliana}	0.31143	NS
De-regulated in leaves only	At3g14450	CID9__RNA-binding protein, putative, contains Pfam profile: PF00076 RNA recognition motif. (a.k.a. RRM, RBD, or RNP domain) (2 copies). Contains PAM PABC binding domain.	0.310945	2.51677
De-regulated in leaves only	At3g06070	expressed protein	0.310257	NS
De-regulated in leaves only	At1g23200	pectinesterase family protein, contains Pfam profile: PF01095 pectinesterase	0.309848	2.93057
De-regulated in leaves only	At4g01700	chitinase, putative, similar to peanut type II chitinase GI:1237025 from (Arachis hypogaea)	0.309449	NS
De-regulated in leaves only	At4g04955	ATALN__Encodes an allantoinase which is involved in allantoin degradation and assimilation. Gene expression was induced when allantoin was added to the medium. The insertion mutant, ataln m2-1, did not grow well on the MS medium where allantoin, instead of ammonium nitrate, was supplied.	0.309177	NS
De-regulated in leaves only	At5g07460	PMSR2__peptide methionine sulfoxide reductase, putative, similar to peptide methionine sulfoxide reductase (msr) (Arabidopsis thaliana) GI:4884033; contains Pfam profile PF01625: Peptide methionine sulfoxide reductase	0.30776	2.12508
De-regulated in leaves only	At2g32100	ATOFP16_OFP16__ovate protein-related, contains TIGRFAM TIGR01568 : uncharacterized plant-specific domain TIGR01568	0.306565	NS
De-regulated in leaves only	At3g52460	hydroxyproline-rich glycoprotein family protein, contains proline-rich extensin domains, INTERPRO:IPR002965	0.305455	NS
De-regulated in leaves only	At1g31580	ECS1_CXC750__expressed protein, identical to ORF1 (Arabidopsis thaliana) gi:457716:emb:CAA50905	0.303783	3.98407
De-regulated in leaves only	At1g04680	pectate lyase family protein, similar to pectate lyase GP:14531296 from (Fragaria x ananassa)	0.303547	NS
De-regulated in leaves only	At5g46230	expressed protein, contains Pfam profile PF04398: Protein of unknown function, DUF538	0.303471	NS
De-regulated in leaves only	At5g60900	RLK1__lectin protein kinase family protein, contains Pfam domains, PF01453: Lectin (probable mannose binding) and PF00069: Protein kinase domain	0.302432	3.65178
De-regulated in leaves only	At3g03780	AtMS2__5-methyltetrahydropteroyltriglutamate--homocysteine methyltransferase, putative / vitamin-B12-independent methionine synthase, putative / cobalamin-independent methionine synthase, putative, very strong similarity to SP:O50008 5-methyltetrahydropteroyltriglutamate--homocysteine methyltransferase (EC 2.1.1.14) (Vitamin-B12-independent methionine synthase isozyme) (Cobalamin-independent meth…	0.302275	2.08104
De-regulated in leaves only	At4g04020	plastid-lipid associated protein PAP, putative / fibrillin, putative, strong similarity to plastid-lipid associated proteins PAP1 GI:14248554, PAP2 GI:14248556 from (Brassica rapa), fibrillin (Brassica napus) GI:4139097; contains Pfam profile PF04755: PAP_fibrillin	0.302215	4.54513
De-regulated in leaves only	At2g18010	auxin-responsive family protein, similar to auxin-induced protein TGSAUR22 (GI:10185820) (Tulipa gesnerian) ;similar to indole-3-acetic acid induced protein ARG7 (SP:P32295) (Phaseolus aureus)	0.300509	NS
De-regulated in leaves only	At5g38240	serine/threonine protein kinase, putative, similar to receptor serine/threonine kinase PR55K gi:1235680:gb:AAC49208; contains protein kinase domain, Pfam:PF00069; contains serine/threonine protein kinase domain, INTERPRO:IPR002290	0.299313	3.34444
De-regulated in leaves only	At5g18690	hydroxyproline-rich glycoprotein family protein, contains proline-rich extensin domains, INTERPRO:IPR002965; Common family member: At3g06360 (Arabidopsis thaliana)	0.298739	NS
De-regulated in leaves only	At1g79770	expressed protein	0.297761	NS
De-regulated in leaves only	At1g26210	expressed protein, similar to hypothetical protein GI:6524175 from (Arabidopsis thaliana)	0.297426	NS
De-regulated in leaves only	At1g62710	BETA-VPE_BETAVPE__vacuolar processing enzyme beta / beta-VPE, identical to SP:Q39044 Vacuolar processing enzyme, beta-isozyme precursor (EC 3.4.22.-) (Beta-VPE) {Arabidopsis thaliana}	0.296823	4.31283
De-regulated in leaves only	At1g24148		0.296175	5.72501
De-regulated in leaves only	At2g39050	hydroxyproline-rich glycoprotein family protein, contains QXW lectin repeat domain, Pfam:PF00652	0.296163	2.67642
De-regulated in leaves only	At5g44820	expressed protein, similar to unknown protein (pir::T04881)	0.294182	2.8735
De-regulated in leaves only	At1g69760	expressed protein	0.293037	NS
De-regulated in leaves only	At2g35860	beta-Ig-H3 domain-containing protein / fasciclin domain-containing protein, contains Pfam profile PF02469: Fasciclin domain	0.292704	NS
De-regulated in leaves only	At3g11010	disease resistance family protein / LRR family protein, contains leucine rich-repeat domains Pfam:PF00560, INTERPRO:IPR001611; similar to disease resistance protein (Lycopersicon esculentum) gi:3894383:gb:AAC78591	0.292025	NS
De-regulated in leaves only	At4g00695	expressed protein	0.289776	NS
De-regulated in leaves only	At2g26440	pectinesterase family protein, contains Pfam profile: PF01095 pectinesterase	0.289271	NS
De-regulated in leaves only	At3g56080	dehydration-responsive protein-related, similar to early-responsive to dehydration stress ERD3 protein (Arabidopsis thaliana) GI:15320410; contains Pfam profile PF03141: Putative methyltransferase	0.288812	6.14248
De-regulated in leaves only	At1g19450	integral membrane protein, putative / sugar transporter family protein, similar to GB:U43629 GI:1209756 integral membrane protein from (Beta vulgaris); contains Pfam profile PF00083: major facilitator superfamily protein; contains TIGRfam TIGR00879: Sugar transporter	0.288507	2.06317
De-regulated in leaves only	At2g35760	integral membrane family protein, contains TIGRFAM TIGR01569 : plant integral membrane protein TIGR01569; contains Pfam PF04535 : Domain of unknown function (DUF588)	0.288292	NS
De-regulated in leaves only	At3g05650	disease resistance family protein, contains leucine rich-repeat (LRR) domains Pfam:PF00560, INTERPRO:IPR001611; similar to Cf-4A protein (Lycopersicon esculentum) gi:3097197:emb:CAA73187	0.287792	NS
De-regulated in leaves only	At3g13672	seven in absentia (SINA) family protein, low similarity to SP:P21461 Developmental protein seven in absentia {Drosophila melanogaster}; contains Pfam profile PF03145: Seven in absentia protein family	0.287277	5.8439
De-regulated in leaves only	At4g22940	protein kinase family protein, contains protein kinase domain, Pfam:PF00069	0.286999	2.49723
De-regulated in leaves only	At2g46420	expressed protein	0.285307	NS
De-regulated in leaves only	At1g26730	EXS family protein / ERD1/XPR1/SYG1 family protein, similar to PHO1 protein (Arabidopsis thaliana) GI:20069032; contains Pfam profiles PF03105: SPX domain, PF03124: EXS family	0.283623	NS
De-regulated in leaves only	At4g30830	expressed protein, weak similarity to M protein type 1 (Streptococcus pyogenes) GI:311758; contains Pfam profile PF04576: Protein of unknown function, DUF593	0.282951	NS
De-regulated in leaves only	At4g18440	adenylosuccinate lyase, putative / adenylosuccinase, putative, similar to SP:P25739 Adenylosuccinate lyase (EC 4.3.2.2) (Adenylosuccinase) {Escherichia coli}; contains Pfam profile PF00206: Lyase	0.282181	NS
De-regulated in leaves only	At5g59130	subtilase family protein, contains similarity to prepro-cucumisin GI:807698 from (Cucumis melo)	0.281455	6.40941
De-regulated in leaves only	At3g49930	zinc finger (C2H2 type) family protein, contains Pfam profile: PF00096 zinc finger, C2H2 type	0.279316	NS
De-regulated in leaves only	At1g29450	auxin-responsive protein, putative, similar to auxin-induced protein 6B (SP:P33083) (Glycine max)	0.278908	2.10779
De-regulated in leaves only	At3g47090	leucine-rich repeat transmembrane protein kinase, putative, receptor kinase-like protein (Xa21), Oryza longistaminata, U72725	0.276879	2.55202
De-regulated in leaves only	At4g23200	protein kinase family protein, contains Pfam PF00069: Protein kinase domain	0.276261	NS
De-regulated in leaves only	At2g38940	ATPT2_PHT1;4__phosphate transporter (PT2), identical to phosphate transporter (AtPT2) (Arabidopsis thaliana) GI:1502430	0.275598	NS
De-regulated in leaves only	At4g38840	auxin-responsive protein, putative, auxin-inducible SAUR gene, Raphanus sativus,AB000708	0.275168	NS
De-regulated in leaves only	At1g31173		0.275102	NS
De-regulated in leaves only	At5g28910	expressed protein	0.274776	NS
De-regulated in leaves only	At1g16850	expressed protein	0.272818	2.67017
De-regulated in leaves only	At3g25760	AOC1__early-responsive to dehydration stress protein (ERD12), nearly identical to early-responsive to dehydration (ERD12) protein (GI:15320414); similar to allene oxide cyclase GI:8977961 from (Lycopersicon esculentum); identical to cDNA ERD12 partial cds GI:15320413	0.272169	3.33832
De-regulated in leaves only	At4g27480	glycosyltransferase family 14 protein / core-2/I-branching enzyme family protein, contains Pfam profile: PF02485 Core-2/I-Branching enzyme	0.271477	3.36952
De-regulated in leaves only	At5g59050	expressed protein	0.270898	2.91698
De-regulated in leaves only	At4g31800	WRKY18__WRKY family transcription factor	0.270214	NS
De-regulated in leaves only	At5g42650	AOS_CYP74A__allene oxide synthase (AOS) / hydroperoxide dehydrase / cytochrome P450 74A (CYP74A), identical to Allene oxide synthase, chloroplast precursor (Hydroperoxide dehydrase) (Cytochrome P450 74A) (SP:Q96242) {Arabidopsis thaliana}	0.269327	NS
De-regulated in leaves only	At1g56670	GDSL-motif lipase/hydrolase family protein, similarity to early early nodulin ENOD8 (Medicago sativa) GI:304037, lanatoside 15`-O-acetylesterase (Digitalis lanata) GI:3688284, elicitor-induced glycoprotein iEP4 (Daucus carota) GI:1911765; contains InterPro Entry IPR001087 Lipolytic enzyme, G-D-S-L family	0.268457	NS
De-regulated in leaves only	At5g59070	glycosyl transferase family 1 protein, contains Pfam profile: PF00534 Glycosyl transferases group 1	0.266755	2.69782
De-regulated in leaves only	At1g45201	similar to lipase class 3 family protein [Arabidopsis thaliana] (TAIR:At5g67050.1); similar to lipase class 3-like [Oryza sativa (japonica cultivar-group)] (GB:BAD35707.1); contains InterPro domain Lipase, class 3 (InterPro:IPR002921)	0.266551	NS
De-regulated in leaves only	At1g19960	expressed protein	0.266315	3.23682
De-regulated in leaves only	At5g64530	ANAC104_XND1__no apical meristem (NAM) family protein, contains Pfam PF02365: No apical meristem (NAM) domain; similar to NAM (no apical meristem)	0.263378	NS
De-regulated in leaves only	At1g59860	17.6 kDa class I heat shock protein (HSP17.6A-CI), similar to 17.5 kDa class I heat shock protein SP:P04793 from (Glycine max)	0.262431	NS
De-regulated in leaves only	At2g47880	glutaredoxin family protein, contains INTERPRO Domain IPR002109, Glutaredoxin (thioltransferase)	0.261892	NS
De-regulated in leaves only	At1g29500	auxin-responsive protein, putative, similar to auxin-induced protein 6B (SP:P33083) (Glycine max)	0.261387	NS
De-regulated in leaves only	At1g65790	ARK1__S-receptor protein kinase, putative, similar to similar to PIR:T05180:T05180 S-receptor kinase ARK3 precursor - (Arabidopsis thaliana)	0.260641	11.6247
De-regulated in leaves only	At5g37600	ATGSR1__glutamine synthetase, putative, similar to glutamine synthetase, cytosolic isozyme (Glutamate-- ammonia ligase, GS1) (Lotus japonicus) SWISS-PROT:Q42899	0.259165	2.98715
De-regulated in leaves only	At1g29460	auxin-responsive protein, putative, similar to auxin-induced protein 6B (SP:P33083) (Glycine max)	0.258292	3.32565
De-regulated in leaves only	At3g51450	strictosidine synthase family protein, similar to hemomucin (Drosophila melanogaster)(GI:1280434), strictosidine synthase (Rauvolfia serpentina)(SP:P15324)	0.257375	NS
De-regulated in leaves only	At2g46450	ATCNGC12_CNGC12__cyclic nucleotide-regulated ion channel, putative (CNGC12), similar to cyclic nucleotide and calmodulin-regulated ion channel (cngc3) GI:4581201 from (Arabidopsis thaliana)	0.254946	NS
De-regulated in leaves only	At5g20670	expressed protein	0.254842	2.06114
De-regulated in leaves only	At2g22330	CYP79B3__cytochrome P450, putative, similar to cytochrome P450 79B2 (SP:O81346) (Arabidopsis thaliana)	0.254765	2.55467
De-regulated in leaves only	At3g05400	sugar transporter, putative, similar to sugar-porter family proteins 1 and 2 (Arabidopsis thaliana) GI:14585699, GI:14585701, integral membrane protein GB:U43629 from (Beta vulgaris); contains Pfam profile PF00083: major facilitator superfamily protein	0.254636	NS
De-regulated in leaves only	At3g25110	acyl-(acyl carrier protein) thioesterase / acyl-ACP thioesterase / oleoyl-(acyl-carrier protein) hydrolase / S-acyl fatty acid synthase thioesterase, identical to acyl-(acyl carrier protein) thioesterase (Arabidopsis thaliana) GI:804946	0.253246	NS
De-regulated in leaves only	At4g05170	similar to ethylene-responsive protein-related [Arabidopsis thaliana] (TAIR:At4g21340.1); similar to bHLH transcription factor-like protein [Oryza sativa (japonica cultivar-group)] (GB:BAD53363.1); contains InterPro domain Basic helix-loop-helix dimerization domain bHLH (InterPro:IPR001092)	0.252689	4.94601
De-regulated in leaves only	At4g30060	expressed protein, contains Pfam profile PF03267: Arabidopsis protein of unknown function, DUF266	0.251189	NS
De-regulated in leaves only	At3g57680	peptidase S41 family protein, similar to PSII D1 protein processing enzyme (GI::7268527) (Arabidopsis thaliana); similar to SP:Q55669 Carboxyl-terminal processing protease precursor (Photosystem II D1 protein processing peptidase) (EC 3.4.21.102) (strain PCC 6803) {Synechocystis sp.}; contains Pfam profile PF03572: Peptidase family S41B	0.250261	5.49088
De-regulated in leaves only	At3g59220	PRN_ATPIRIN1_PRN1__pirin, putative, similar to SP:O00625 Pirin {Homo sapiens}; contains Pfam profile PF02678: Pirin	0.247224	NS
De-regulated in leaves only	At5g40230	nodulin-related, low similarity to MtN21 (Medicago truncatula) GI:2598575; contains Pfam profile PF00892: Integral membrane protein	0.247222	NS
De-regulated in leaves only	At5g45280	pectinacetylesterase, putative, similar to pectinacetylesterase precursor GI:1431629 from (Vigna radiata)	0.246888	NS
De-regulated in leaves only	At3g08870	lectin protein kinase, putative, similar to receptor lectin kinase 3 (Arabidopsis thaliana) gi:4100060:gb:AAD00733; contains protein kinase domain, Pfam:PF00069; contains legume lectins alpha and beta domains, Pfam:PF00138 and Pfam:PF00139	0.244692	9.86991
De-regulated in leaves only	At5g03995		0.24466	NS
De-regulated in leaves only	At5g07690	MYB29__myb family transcription factor (MYB29), similar to myb transcription factor GI:3941436 from (Arabidopsis thaliana)	0.244399	9.1941
De-regulated in leaves only	At3g22240	expressed protein	0.244379	NS
De-regulated in leaves only	At1g64370	expressed protein	0.243853	4.99431
De-regulated in leaves only	At1g29395	COR414-TM1__stress-responsive protein, putative, similar to cold acclimation WCOR413-like protein gamma form (Hordeum vulgare) gi:18449100:gb:AAL69988; similar to stress-regulated protein SAP1 (Xerophyta viscosa) gi:21360378:gb:AAM47505	0.243302	NS
De-regulated in leaves only	At3g61880	CYP78A9__cytochrome P450, putative, similar to cytochrome p450 SP:O48927 from (Arabidopsis thaliana)	0.242744	18.5431
De-regulated in leaves only	At5g50950	fumarate hydratase, putative / fumarase, putative, similar to SP:P55250 Fumarate hydratase, mitochondrial precursor (EC 4.2.1.2) (Fumarase) {Rhizopus oryzae}; contains Pfam profile PF00206: Lyase	0.24128	3.76036
De-regulated in leaves only	At5g18030	auxin-responsive protein, putative, similar to auxin-inducible SAUR (Small Auxin Up RNAs) (GI:3043536) (Raphanus sativus)	0.240263	2.00716
De-regulated in leaves only	At5g58670	ATPLC1_ATPLC_PLC1__phosphoinositide-specific phospholipase C (PLC1), identical to phosphoinositide specific phospholipase C (Arabidopsis thaliana) GI:902923	0.23978	5.9146
De-regulated in leaves only	At5g62280	expressed protein	0.239558	NS
De-regulated in leaves only	At3g05165	sugar transporter, putative, similar to sugar-porter family proteins 1 and 2 (Arabidopsis thaliana) GI:14585699, GI:14585701; contains Pfam profile PF00083: major facilitator superfamily protein	0.236703	4.85753
De-regulated in leaves only	At4g03400	DFL2_GH3-10__auxin-responsive GH3 family protein, similar to auxin-responsive GH3 product (Glycine max) GI:18591; contains Pfam profile PF03321: GH3 auxin-responsive promoter	0.235893	2.18485
De-regulated in leaves only	At3g12520	SULTR4;2__sulfate transporter family protein, similar to sulfate transporter (Arabidopsis thaliana) GI:3777483; contains Pfam profiles PF00916: Sulfate transporter family, PF01740: STAS domain	0.235068	NS
De-regulated in leaves only	At1g28570	GDSL-motif lipase, putative, similar to lipase (Arabidopsis thaliana) GI:1145627; contains InterPro Entry IPR001087 Lipolytic enzyme, G-D-S-L family	0.234776	3.06219
De-regulated in leaves only	At5g44568		0.234315	NS
De-regulated in leaves only	At5g04200	latex-abundant protein, putative (AMC9) / caspase family protein, similar to latex-abundant protein (Hevea brasiliensis) gb:AAD13216; contains Pfam profile PF00656: ICE-like protease (caspase) p20 domain	0.231689	NS
De-regulated in leaves only	At2g21550	bifunctional dihydrofolate reductase-thymidylate synthase, putative / DHFR-TS, putative, similar to THY-1 (SP: Q05762) and THY-2 (SP:Q05763) from Arabidopsis thaliana; contains Pfam profiles PF00303 thymidylate synthase and PF00186 dihydrofolate reductase	0.231601	NS
De-regulated in leaves only	At3g23870	permease-related, low similarity to purine permease (Arabidopsis thaliana) GI:7620007; contains 9 predicted transmembrane domains; contains Pfam PF05653: Protein of unknown function (DUF803); identified as COG0697, Permeases of the drug/metabolite transporter (DMT) superfamily	0.231137	5.80869
De-regulated in leaves only	At3g26170	CYP71B19__cytochrome P450 71B19, putative (CYP71B19), Identical to cytochrome P450 71B19 (SP:Q9LTM4)(Arabidopsis thaliana);similar to cytochrome P450 GB:O65784 (Arabidopsis thaliana)	0.229935	22.0413
De-regulated in leaves only	At3g25770	AOC3__allene oxide cyclase, putative / early-responsive to dehydration protein, putative / ERD protein, putative, strong similarity to early-responsive to dehydration (ERD12) protein (GI:15320414); similar to allene oxide cyclase GI:8977961 from (Lycopersicon esculentum); contains Pfam profile PF06351: Allene oxide cyclase	0.228569	NS
De-regulated in leaves only	At5g07780	formin homology 2 domain-containing protein / FH2 domain-containing protein, contains formin homology 2 domain, Pfam:PF02181	0.228547	NS
De-regulated in leaves only	At1g67360	rubber elongation factor (REF) family protein, contains Pfam profile: PF05755 rubber elongation factor protein (REF)	0.228174	3.56496
De-regulated in leaves only	At1g06090	fatty acid desaturase family protein, similar to delta 9 acyl-lipid desaturase GB:BAA25180 GI:2970034 (ADS1) from (Arabidopsis thaliana)	0.227577	NS
De-regulated in leaves only	At1g22160	senescence-associated protein-related, similar to senescence-associated protein SAG102 (GI:22331931) (Arabidopsis thaliana)	0.226992	4.48113
De-regulated in leaves only	At1g68600	expressed protein, contains Pfam profile PF01027: Uncharacterized protein family UPF0005	0.226403	6.1532
De-regulated in leaves only	At5g01820	ATSR1_CIPK14__CBL-interacting protein kinase 14 (CIPK14), identical to CBL-interacting protein kinase 14 (Arabidopsis thaliana) gi:13249127:gb:AAK16689; contains Pfam profiles PF00069: Protein kinase domain and PF03822: NAF domain; identical to cDNA CBL-interacting protein kinase 14 (CIPK14) GI:13249126	0.225911	2.90872
De-regulated in leaves only	At2g46640	expressed protein, and genefinder; expression supported by MPSS	0.225904	3.2114
De-regulated in leaves only	At2g01175	expressed protein	0.224648	3.55843
De-regulated in leaves only	At4g34650	SQS2__farnesyl-diphosphate farnesyltransferase 2 / squalene synthase 2 (SQS2), nearly identical to GI:2228795; synonomous with farnesyl-diphosphate farnesyltransferase, FPP:FPP farnesyltransferase, and squalene synthetase	0.224392	NS
De-regulated in leaves only	At1g23130	Bet v I allergen family protein, similar to Csf-2 (Cucumis sativus)(GI:5762258)(J Am Soc Hortic Sci 124, 136-139 (1999)); location of ESTs gb:T45139 and gb:T43456 ; contains Pfam profile PF00407: Pathogenesis-related protein Bet v I family	0.223412	5.79857
De-regulated in leaves only	At5g46600	expressed protein, contains Pfam profile PF01027: Uncharacterized protein family UPF0005; expression supported by MPSS	0.221286	NS
De-regulated in leaves only	At4g21380	ARK3__S-locus protein kinase, putative (ARK3), identical to PIR:T05180:T05180 S-receptor kinase ARK3 precursor - (Arabidopsis thaliana)	0.220623	2.33841
De-regulated in leaves only	At1g64170	ATCHX16_CHX16__cation/hydrogen exchanger, putative (CHX16), monovalent cation:proton antiporter family 2 (CPA2) member, PMID:11500563	0.220214	NS
De-regulated in leaves only	At3g45140	LOX2_ATLOX2__lipoxygenase (LOX2), identical to SP:P38418	0.219842	NS
De-regulated in leaves only	At3g56200	amino acid transporter family protein, low similarity to N system amino acids transporter NAT-1 (Mus musculus) GI:7406950; belongs to INTERPRO:IPR002422 amino acid/polyamine transporter, family II	0.21906	6.64744
De-regulated in leaves only	At2g16990	expressed protein	0.218417	2.0397
De-regulated in leaves only	At4g13560	late embryogenesis abundant domain-containing protein / LEA domain-containing protein, similar to LEA protein (Cicer arietinum) GI:2909420; contains Pfam profile PF02987: Late embryogenesis abundant protein	0.217374	NS
De-regulated in leaves only	At4g12330	CYP706A5_CYP706A7__cytochrome P450 family protein, contains Pfam profile:PF00067 cytochrome p450	0.214023	NS
De-regulated in leaves only	At3g52820	ATPAP22_PAP22__purple acid phosphatase (PAP22), identical to purple acid phosphatase (PAP22)GI:20257494 from (Arabidopsis thaliana)	0.211877	NS
De-regulated in leaves only	At2g05100	LHCB2.1_LHCB2.3__chlorophyll A-B binding protein / LHCII type II (LHCB2.1) (LHCB2.3), identical to Lhcb2 protein (Arabidopsis thaliana) GI:4741948, GI:4741944; contains Pfam profile PF00504: Chlorophyll A-B binding protein	0.21184	NS
De-regulated in leaves only	At1g52290	protein kinase family protein, contains Pfam PF00069: Protein kinase domain	0.207406	NS
De-regulated in leaves only	At5g24290	integral membrane family protein, contains Pfam domain PF01988: Integral membrane protein	0.206865	NS
De-regulated in leaves only	At5g20410	MGD2_ATMGD2__1,2-diacylglycerol 3-beta-galactosyltransferase, putative / monogalactosyldiacylglycerol synthase, putative / MGDG synthase, putative, identical to monogalactosyldiacylglycerol synthase (gi:3367638) from Arabidopsis thaliana, similar to MGDG synthase type A (gi:9884651) from Glycine max	0.206639	NS
De-regulated in leaves only	At1g73860	kinesin motor protein-related, similar to kinesin-C GB:AAF04841 from (Strongylocentrotus purpuratus)	0.206333	NS
De-regulated in leaves only	At3g52720	carbonic anhydrase family protein, low similarity to storage protein (dioscorin) (Dioscorea cayenensis) GI:433463; contains Pfam profile PF00194: Eukaryotic-type carbonic anhydrase	0.203394	3.28578
De-regulated in leaves only	At1g03980	ATPCS2__phytochelatin synthase 2 (PCS2), identical to phytochelatin synthase (Arabidopsis thaliana) gi:16519291:gb:AAK94671	0.201794	NS
De-regulated in leaves only	At2g23000	SCPL10__serine carboxypeptidase S10 family protein, similar to serine carboxypeptidase I precursor (SP:P37890) (Oryza sativa)	0.201308	NS
De-regulated in leaves only	At2g40460	proton-dependent oligopeptide transport (POT) family protein, contains Pfam profile: PF00854 POT family	0.200027	NS
De-regulated in leaves only	At3g57140	patatin-related, contains Patatin domain PF01734	0.195605	NS
De-regulated in leaves only	At3g62740	glycosyl hydrolase family 1 protein, contains Pfam PF00232 : Glycosyl hydrolase family 1 domain; similar to hydroxyisourate hydrolase (GI:19569603) (Glycine max)	0.195448	NS
De-regulated in leaves only	At1g02460	glycoside hydrolase family 28 protein / polygalacturonase (pectinase) family protein, similar to polygalacturonase PG1 GI:5669846, PG2 GI:5669848 from (Glycine max); contains PF00295: Glycosyl hydrolases family 28 (polygalacturonases)	0.194414	NS
De-regulated in leaves only	At4g13770	CYP83A1_REF2__cytochrome P450 family protein	0.191355	8.67374
De-regulated in leaves only	At1g64360	expressed protein	0.190697	33.099
De-regulated in leaves only	At1g62180	APR2_APSR_ATAPR2_PRH_PRH43__5`-adenylylsulfate reductase 2, chloroplast (APR2) (APSR) / adenosine 5`-phosphosulfate 5`-adenylylsulfate (APS) sulfotransferase 2 / 3`-phosphoadenosine-5`-phosphosulfate (PAPS) reductase homolog 43 (PRH-43), identical to SP:P92981 5`-adenylylsulfate reductase 2, chloroplast precursor (EC 1.8.4.9) (Adenosine 5`-phosphosulfate 5`-adenylylsulfate sulfotransferase 2) (AP…	0.189023	4.75282
De-regulated in leaves only	At1g17250	leucine-rich repeat family protein, contains leucine rich-repeat (LRR) domains Pfam:PF00560, INTERPRO:IPR001611; similar to Hcr2-0B (Lycopersicon esculentum) gi:3894387:gb:AAC78593	0.187389	NS
De-regulated in leaves only	At3g13404		0.187081	NS
De-regulated in leaves only	At3g02020	aspartate kinase, lysine-sensitive, putative, similar to aspartate kinase gi:2257743 (Arabidopsis thaliana)	0.186526	26.7249
De-regulated in leaves only	At1g78370	ATGSTU20__glutathione S-transferase, putative, similar to 2,4-D inducible glutathione S-transferase GI:2920666 from (Glycine max)	0.186194	2.95771
De-regulated in leaves only	At1g49230	zinc finger (C3HC4-type RING finger) family protein, contains Pfam domain, PF00097: Zinc finger, C3HC4 type (RING finger)	0.186112	0.460492
De-regulated in leaves only	At5g24770	VSP2__vegetative storage protein 2 (VSP2), identical to SP:O82122 Vegetative storage protein 2 precursor {Arabidopsis thaliana}; contains Pfam profile PF03767: HAD superfamily (subfamily IIIB) phosphatase	0.185503	NS
De-regulated in leaves only	At1g69970	CLE26__CLE26, putative, CLAVATA3/ESR-Related 26 (CLE26);	0.184938	NS
De-regulated in leaves only	At1g29430	auxin-responsive family protein, similar to auxin-induced protein 10a 6B {SP:P33083) (Glycine max)	0.183883	NS
De-regulated in leaves only	At5g18020	auxin-responsive protein, putative, similar to auxin-inducible SAUR (Small Auxin Up RNAs) (GI:3043536) (Raphanus sativus)	0.181892	2.77027
De-regulated in leaves only	At5g62850	nodulin MtN3 family protein, contains Pfam PF03083 MtN3/saliva family; similar to LIM7 (cDNAs induced in meiotic prophase in lily microsporocytes) GI:431154 from (Lilium longiflorum)	0.181864	NS
De-regulated in leaves only	At1g18870	isochorismate synthase, putative / isochorismate mutase, putative, similar to GI:17223087	0.181366	NS
De-regulated in leaves only	At1g55380	DC1 domain-containing protein, contains Pfam profile PF03107: DC1 domain	0.179957	NS
De-regulated in leaves only	At1g64110	AAA-type ATPase family protein, contains Pfam domain, PF00004: ATPase, AAA family	0.177329	13.009
De-regulated in leaves only	At5g67450	AZF1__zinc finger (C2H2 type) protein 1 (AZF1), identical to Cys2/His2-type zinc finger protein 1 (Arabidopsis thaliana) gi:6009887:dbj:BAA85108	0.176986	NS
De-regulated in leaves only	At5g07000	sulfotransferase family protein, similar to steroid sulfotransferase 3 (Brassica napus) GI:3420008, steroid sulfotransferase 1 (Brassica napus) GI:3420004; contains Pfam profile PF00685: Sulfotransferase domain	0.175399	NS
De-regulated in leaves only	At4g13564		0.175248	NS
De-regulated in leaves only	At5g23010	MAM1_IMS3__2-isopropylmalate synthase 3 (IMS3), identical to 2-isopropylmalate synthase (IMS3) (Arabidopsis thaliana) GI:15983745; identical to cDNA 2-isopropylmalate synthase (IMS3) GI:15983744	0.174316	12.6385
De-regulated in leaves only	At1g73700	MATE efflux family protein, similar to ripening regulated protein DDTFR18 (Lycopersicon esculentum) GI:12231296; contains Pfam profile: PF01554 uncharacterized membrane protein family	0.173509	8.74325
De-regulated in leaves only	At2g40750	WRKY54_ATWRKY54__WRKY family transcription factor, contains Pfam profile: PF03106 WRKY DNA -binding domain	0.17233	NS
De-regulated in leaves only	At4g23600	CORI3_JR2__coronatine-responsive tyrosine aminotransferase / tyrosine transaminase, similar to nicotianamine aminotransferase from Hordeum vulgare (GI:6498122, GI:6469087); contains Pfam profile PF00155 aminotransferase, classes I and II; identical to cDNA coronatine-regulated tyrosine aminotransferase (F9D16.70) GI:15076852	0.171843	6.12423
De-regulated in leaves only	At5g52640	HSP81-1_ATHS83_HSP81.1_HSP83__heat shock protein 81-1 (HSP81-1) / heat shock protein 83 (HSP83), nearly identical to SP:P27323 Heat shock protein 81-1 (HSP81-1) (Heat shock protein 83) {Arabidopsis thaliana}; contains Pfam profiles PF02518: ATPase, histidine kinase-, DNA gyrase B-, and HSP90-like domain protein, PF00183: Hsp90 protein	0.171742	NS
De-regulated in leaves only	At1g29440	auxin-responsive family protein, similar to auxin-induced protein 6B (SP:P33083) (Glycine max)	0.170376	NS
De-regulated in leaves only	At1g19630	CYP722A1__cytochrome P450 family protein, similar to Cytochrome P450 90A1 (SP:Q42569) (Arabidopsis thaliana)	0.168345	NS
De-regulated in leaves only	At5g14200	3-isopropylmalate dehydrogenase, chloroplast, putative, strong similarity to SP:P29102 3-isopropylmalate dehydrogenase, chloroplast precursor {Brassica napus}	0.167734	6.10865
De-regulated in leaves only	At1g62560	flavin-containing monooxygenase family protein / FMO family protein, similar to flavin-containing monooxygenase GB:AAA21178 GI:349534 SP:P32417 from (Oryctolagus cuniculus); contains Pfam profile PF00743 Flavin-binding monooxygenase-like	0.167356	12.9044
De-regulated in leaves only	At5g59680	leucine-rich repeat protein kinase, putative, similar to light repressible receptor protein kinase (Arabidopsis thaliana) gi:1321686:emb:CAA66376; contains leucine rich repeat (LRR) domains, Pfam:PF00560; contains protein kinase domain, Pfam:PF00069	0.166666	3.23058
De-regulated in leaves only	At4g01380	plastocyanin-like domain-containing protein	0.164667	21.6406
De-regulated in leaves only	At5g42250	alcohol dehydrogenase, putative, similar to alcohol dehydrogenase ADH GI:7705214 from (Lycopersicon esculentum); contains Pfam zinc-binding dehydrogenase domain PF00107	0.163323	4.59792
De-regulated in leaves only	At1g19640	JMT__S-adenosyl-L-methionine:jasmonic acid carboxyl methyltransferase (JMT), nearly identical to gi:13676829	0.161664	4.9178
De-regulated in leaves only	At4g15210	ATBETA-AMY_AT-BETA-AMY_RAM1__beta-amylase (BMY1) / 1,4-alpha-D-glucan maltohydrolase, identical to Beta-amylase (EC 3.2.1.2) (1,4-alpha-D-glucan maltohydrolase) SP:P25853 (Arabidopsis thaliana)	0.161056	NS
De-regulated in leaves only	At4g17670	senescence-associated protein-related, similar to senescence-associated protein SAG102 (GI:22331931) (Arabidopsis thaliana);	0.15902	0.390566
De-regulated in leaves only	At3g48280	CYP71A25__cytochrome P450, putative, nearly identical to cytochrome P450 71A25 (SP:Q9STK8) (Arabidopsis thaliana);	0.158935	6.34409
De-regulated in leaves only	At1g19940	glycosyl hydrolase family 9 protein, similar to endo-beta-1,4-D-glucanase GI:4165132 from (Lycopersicon esculentum)	0.158724	NS
De-regulated in leaves only	At4g01985	expressed protein	0.156498	9.01524
De-regulated in leaves only	At5g20640	expressed protein, contains Pfam profile PF04525: Protein of unknown function (DUF567)	0.156096	NS
De-regulated in leaves only	At5g20790	expressed protein, predicted protein, Arabidopsis thaliana	0.155236	NS
De-regulated in leaves only	At5g44050	MATE efflux family protein, similar to ripening regulated protein DDTFR18 (Lycopersicon esculentum) GI:12231296; contains Pfam profile PF01554: Uncharacterized membrane protein family	0.153519	NS
De-regulated in leaves only	At2g19650	DC1 domain-containing protein, contains Pfam profile PF03107: DC1 domain	0.152943	3.80981
De-regulated in leaves only	At3g12580	HSP70__heat shock protein 70, putative / HSP70, putative, strong similarity to heat shock protein GI:425194 (Spinacia oleracea)	0.152737	0.419495
De-regulated in leaves only	At2g46440	ATCNGC11_CNGC11__similar to cyclic nucleotide-regulated ion channel, putative (CNGC12) [Arabidopsis thaliana] (TAIR:At2g46450.1); similar to cyclic nucleotide-regulated ion channel / cyclic nucleotide-gated channel (CNGC3) [Arabidopsis thaliana] (TAIR:At2g46430.1); similar to cyclic nucleotide-regulated ion channel / cyclic nucleotide-gated channel (CNGC1) [Arabidopsis thaliana] (TAIR:At5g53130.1…	0.149568	2.69966
De-regulated in leaves only	At5g49525	expressed protein	0.146513	20.1627
De-regulated in leaves only	At1g73600	phosphoethanolamine N-methyltransferase 3, putative (NMT3), strong similarity to SP:Q9FR44 Phosphoethanolamine N-methyltransferase 1 (EC 2.1.1.103) (PEAMT 1) (AtNMT1) {Arabidopsis thaliana}; identical to SP:Q9C6B9 Putative phosphoethanolamine N-methyltransferase 3 {Arabidopsis thaliana}	0.144049	3.96847
De-regulated in leaves only	At1g08090	ATNRT2:1_ACH1_ATNRT2.1_LIN1_NRT2_NRT2.1_NRT2;1AT__high-affinity nitrate transporter (ACH1), identical to trans-membrane nitrate transporter protein AtNRT2:1 (Arabidopsis thaliana) GI:3747058, high-affinity nitrate transporter ACH1 (Arabidopsis thaliana) GI:3608362	0.143521	NS
De-regulated in leaves only	At4g35640	ATSERAT3;2__Encodes a cytosolic serine O-acetyltransferase involved in sulfur assimilation and cysteine biosynthesis. Expressed in the vascular system. Expression is induced in both roots and shoots under sulfur-starved conditions.	0.140811	NS
De-regulated in leaves only	At1g27030	expressed protein	0.139657	NS
De-regulated in leaves only	At5g50800	nodulin MtN3 family protein, similar to MtN3 GI:1619602 (root nodule development) from (Medicago truncatula)	0.139305	21.1425
De-regulated in leaves only	At5g24660	expressed protein	0.139049	14.9731
De-regulated in leaves only	At2g14095	expressed protein	0.137868	NS
De-regulated in leaves only	At1g53633		0.134968	NS
De-regulated in leaves only	At2g16890	UDP-glucoronosyl/UDP-glucosyl transferase family protein, contains Pfam profile: PF00201 UDP-glucoronosyl and UDP-glucosyl transferase	0.132641	NS
De-regulated in leaves only	At3g47420	glycerol-3-phosphate transporter, putative / glycerol 3-phosphate permease, putative, similar to cAMP inducible 2 protein (Mus musculus) GI:4580997, glycerol-3-phosphate transporter (glycerol 3-phosphate permease) (Homo sapiens) GI:7543982; contains Pfam profile PF00083: major facilitator superfamily protein	0.131961	NS
De-regulated in leaves only	At1g19510	myb family transcription factor, contains PFAM profile: PF00249 myb-like DNA binding domain	0.130974	8.90632
De-regulated in leaves only	At5g52310	LTI78_RD29A_COR78_LTI140_LTI78_RD29A__low-temperature-responsive protein 78 (LTI78) / desiccation-responsive protein 29A (RD29A)	0.130662	NS
De-regulated in leaves only	At5g18080	auxin-responsive protein, putative, similar to GP:3043536 SAUR {Raphanus sativus}	0.128789	2.80331
De-regulated in leaves only	At3g22235	expressed protein	0.12868	NS
De-regulated in leaves only	At3g44860	S-adenosyl-L-methionine:carboxyl methyltransferase family protein, similar to defense-related protein cjs1 (Brassica carinata)(GI:14009292)(Mol Plant Pathol (2001) 2(3):159-169)	0.12793	6.95039
De-regulated in leaves only	At4g21990	APR3_ATAPR3_PRH26_PRH-26__5`-adenylylsulfate reductase (APR3) / PAPS reductase homolog (PRH26), identical to 5`-adenylylsulfate reductase (Arabidopsis thaliana) GI:2738760; identical to cDNA PAPS reductase homolog (PRH26) GI:1710113	0.127228	2.33001
De-regulated in leaves only	At1g24147		0.127226	9.80967
De-regulated in leaves only	At4g28720	flavin-containing monooxygenase family protein / FMO family protein, similar to flavin-containing monooxygenases YUCCA (gi:16555352), YUCCA2 (gi:16555354), and YUCCA3 (gi:16555356) from Arabidopsis thaliana	0.124716	NS
De-regulated in leaves only	At3g19710	branched-chain amino acid aminotransferase, putative / branched-chain amino acid transaminase, putative (BCAT4), similar to branched-chain amino acid transaminase 6 (Arabidopsis thaliana) GI:13810195; contains Pfam profile: PF01063 aminotransferase class IV	0.123727	30.7032
De-regulated in leaves only	At2g34010	expressed protein, similar to expressed protein [Arabidopsis thaliana] (TAIR:At1g29010.1)	0.122199	0.346601
De-regulated in leaves only	At4g00670	similar to DNA-binding protein, putative [Arabidopsis thaliana] (TAIR:At2g45820.1); similar to OSJNBb0039L24.13 [Oryza sativa (japonica cultivar-group)] (GB:XP_473296.1); contains InterPro domain Remorin, C-terminal region (InterPro:IPR005516)	0.121092	NS
De-regulated in leaves only	At1g16410	CYP79F1_BUS1_SPS1__cytochrome P450, putative, similar to gb:AF069494 cytochrome P450 from Sinapis alba and is a member of the PF:00067 Cytochrome P450 family	0.120994	29.1355
De-regulated in leaves only	At3g22231	PCC1__expressed protein	0.118748	NS
De-regulated in leaves only	At5g08030	glycerophosphoryl diester phosphodiesterase family protein, similar to glycerophosphodiester phosphodiesterase (Borrelia hermsii) GI:1399038; contains Pfam profile PF03009: Glycerophosphoryl diester phosphodiesterase family	0.11567	NS
De-regulated in leaves only	At3g05660	similar to disease resistance family protein [Arabidopsis thaliana] (TAIR:At3g11080.1); similar to disease resistance family protein / LRR family protein [Arabidopsis thaliana] (TAIR:At3g11010.1); similar to disease resistance family protein [Arabidopsis thaliana] (TAIR:At2g15080.2); similar to disease resistance family protein [Arabidopsis thaliana] (TAIR:At5g27060.1); similar to disease resista…	0.113654	0.326741
De-regulated in leaves only	At3g16360	AHP4__phosphotransfer family protein, similar to two-component phosphorelay mediators ATHP1 (GI:4156241), ATHP3 (GI:4156245) (Arabidopsis thaliana), histidine-containing phosphotransfer protein (Catharanthus roseus) GI:13774348	0.112632	NS
De-regulated in leaves only	At4g21760	glycosyl hydrolase family 1 protein, contains Pfam PF00232 : Glycosyl hydrolase family 1 domain; TIGRFAM TIGR01233: 6-phospho-beta-galactosidase; similar to dalcochinin 8`-O-beta-glucoside beta-glucosidase precursor (GI:6118076) (Dalbergia cochinchinensis)	0.111007	3.29468
De-regulated in leaves only	At3g44450	expressed protein	0.109042	3.87781
De-regulated in leaves only	At2g04170	meprin and TRAF homology domain-containing protein / MATH domain-containing protein, weak similarity to NtN2 (Medicago truncatula) GI:3776084; contains Pfam profile PF00917: MATH domain	0.107624	5.15713
De-regulated in leaves only	At2g43100	aconitase C-terminal domain-containing protein, contains Pfam profile PF00694: Aconitase C-terminal domain	0.0990399	10.49
De-regulated in leaves only	At2g47015		0.0937001	NS
De-regulated in leaves only	At1g78000	SULTR1;2_SEL1__sulfate transporter (Sultr1;2), identical to sulfate transporter Sultr1;2 (Arabidopsis thaliana) GI:7768660; contaisn Pfam profiles PF00916: Sulfate transporter family and PF01740: STAS domain; contains TIGRfam profile TIGR00815: sulfate permease	0.0911244	NS
De-regulated in leaves only	At5g05840	expressed protein, contains Pfam profile PF04788: Protein of unknown function (DUF620); expression supported by MPSS	0.079444	NS
De-regulated in leaves only	At4g04610	APR1_APR_ATAPR1_PRH19__5`-adenylylsulfate reductase (APR1) / PAPS reductase homolog (PRH19), identical to 5`-adenylylsulfate reductase (Arabidopsis thaliana) GI:2738756; identical to cDNA PAPS reductase homolog (PRH19) GI:1710111	0.0771348	5.4934
De-regulated in leaves only	At4g19430	expressed protein	0.07212	0.275261
De-regulated in leaves only	At5g16570	GLN1;4__glutamine synthetase, putative, similar to glutamine synthetase, cytosolic isozyme (glutamate-- ammonia ligase) (Alfalfa) SWISS-PROT:P04078	0.0678911	NS
De-regulated in leaves only	At1g04770	male sterility MS5 family protein, similar to male sterility MS5 (Arabidopsis thaliana) GI:3859112; contains Pfam profile PF00515 TPR Domain	0.0652622	NS
De-regulated in leaves only	At1g09350	galactinol synthase, putative, contains Pfam profile: PF01501 glycosyl transferase family 8	0.0646943	25.8337
De-regulated in leaves only	At1g77960	similar to octicosapeptide/Phox/Bem1p (PB1) domain-containing protein [Arabidopsis thaliana] (TAIR:At5g09620.1); similar to hypothetical protein DDB0216723 [Dictyostelium discoideum] (GB:EAL72846.1); contains domain HIS_RICH (PS50316); contains domain GLN_RICH (PS50322)	0.0611843	5.0191
De-regulated in leaves only	At2g32487		0.0595142	3.90587
De-regulated in leaves only	At2g14560	expressed protein, contains Pfam profile PF04525: Protein of unknown function (DUF567)	0.0584831	2.72099
De-regulated in leaves only	At1g80130	expressed protein	0.0461119	10.8624
De-regulated in leaves only	At4g04830	methionine sulfoxide reductase domain-containing protein / SeIR domain-containing protein, low similarity to pilin-like transcription factor (Homo sapiens) GI:5059062, SP:P14930 Peptide methionine sulfoxide reductase msrA/msrB (EC 1.8.4.6) {Neisseria gonorrhoeae}; contains Pfam profile PF01641: SelR domain	0.0333077	13.7464
De-regulated in leaves only	At4g25100	FSD1__superoxide dismutase (Fe), chloroplast (SODB) / iron superoxide dismutase (FSD1), identical to Fe-superoxide dismutase (Arabidopsis thaliana) gi:166700:gb:AAA32791; supported by cDNA, Ceres:32935	0.0233573	5.16195
De-regulated in leaves only	At5g26220	ChaC-like family protein, contains Pfam profile: PF04752 ChaC-like protein	0.0193325	NS
De-regulated in leaves only	At3g55240	expressed protein	0.0153309	10.43

## Sheet: JL vs ES-Contra-DE genes-GO
			GO_acc	term_type	Term	queryitem	querytotal	bgitem	bgtotal	pvalue	FDR	entries
Analysis Brief Summary			GO:0009639	P	response to red or far red light	5	20	406	28397	8e-06	0.00012	// AT1G67090 // AT5G11260 // AT2G32950 // AT4G10180 // AT1G09530
Species:	Arabidopsis		GO:0042440	P	pigment metabolic process	5	20	361	28397	4.6e-06	0.00012	// AT2G32950 // AT5G11260 // AT5G13630 // AT4G15560 // AT1G09530
GO type:	Completed GO		GO:0015979	P	photosynthesis	5	20	435	28397	1.1e-05	0.00012	// AT1G67090 // AT4G02770 // AT5G13630 // AT1G29930 // AT2G05070
Background/Reference:	TAIR10		GO:0009416	P	response to light stimulus	6	20	1188	28397	0.00013	0.001	// AT5G11260 // AT4G15560 // AT1G67090 // AT2G32950 // AT4G10180 // AT1G09530
Annotated number Entered:	20		GO:0009314	P	response to radiation	6	20	1263	28397	0.00018	0.0012	// AT5G11260 // AT4G15560 // AT1G67090 // AT2G32950 // AT4G10180 // AT1G09530
Annotated number in query list:	20		GO:0006519	P	cellular amino acid and derivative metabolic process	5	20	1324	28397	0.0019	0.011	// AT4G02770 // AT5G11260 // AT2G32950 // AT4G15560 // AT1G09530
Annotated number in reference:	28397		GO:0009628	P	response to abiotic stimulus	6	20	2635	28397	0.0079	0.037	// AT5G11260 // AT4G15560 // AT1G67090 // AT2G32950 // AT4G10180 // AT1G09530
Significant GO terms:	21		GO:0006807	P	nitrogen compound metabolic process	9	20	5675	28397	0.01	0.041	// AT4G02770 // AT5G11260 // AT4G15560 // AT2G32950 // AT4G10180 // AT5G13630 // AT1G24510 // AT5G48240 // AT1G09530
			GO:0006139	P	nucleobase, nucleoside, nucleotide and nucleic acid metabolic process	8	20	4798	28397	0.012	0.044	// AT4G02770 // AT5G11260 // AT4G15560 // AT2G32950 // AT4G10180 // AT1G24510 // AT5G48240 // AT1G09530
			GO:0008152	P	metabolic process	15	20	13633	28397	0.013	0.044	// AT4G02770 // AT5G11260 // AT4G15560 // AT2G05070 // AT1G67090 // AT1G24510 // AT4G34350 // AT3G17070 // AT1G29930 // AT4G10180 // AT2G32950 // AT5G13630 // AT3G19390 // AT5G48240 // AT1G09530
			GO:0009791	P	post-embryonic development	5	20	2188	28397	0.016	0.048	// AT5G43500 // AT5G11260 // AT2G32950 // AT4G10180 // AT1G09530
			GO:0044281	P	small molecule metabolic process	7	20	4065	28397	0.017	0.048	// AT4G02770 // AT5G11260 // AT4G15560 // AT4G34350 // AT2G32950 // AT5G48240 // AT1G09530
			GO:0044435	C	plastid part	6	20	1252	28397	0.00017	0.0018	// AT4G02770 // AT1G29930 // AT1G67090 // AT2G05070 // AT4G34350 // AT5G13630
			GO:0044434	C	chloroplast part	6	20	1211	28397	0.00014	0.0018	// AT4G02770 // AT1G29930 // AT1G67090 // AT2G05070 // AT4G34350 // AT5G13630
			GO:0043234	C	protein complex	6	20	1358	28397	0.00026	0.0018	// AT4G02770 // AT1G29930 // AT1G67090 // AT2G05070 // AT2G32950 // AT5G13630
			GO:0044446	C	intracellular organelle part	8	20	3379	28397	0.0013	0.0057	// AT4G02770 // AT1G29930 // AT1G67090 // AT2G05070 // AT4G34350 // AT2G32950 // AT5G48240 // AT5G13630
			GO:0044422	C	organelle part	8	20	3385	28397	0.0014	0.0057	// AT4G02770 // AT1G29930 // AT1G67090 // AT2G05070 // AT4G34350 // AT2G32950 // AT5G48240 // AT5G13630
			GO:0031090	C	organelle membrane	5	20	1327	28397	0.0019	0.0068	// AT1G67090 // AT4G02770 // AT5G13630 // AT1G29930 // AT2G05070
			GO:0032991	C	macromolecular complex	6	20	2050	28397	0.0023	0.0068	// AT4G02770 // AT1G29930 // AT1G67090 // AT2G05070 // AT2G32950 // AT5G13630
			GO:0009507	C	chloroplast	8	20	3959	28397	0.0038	0.0099	// AT4G02770 // AT4G15560 // AT1G29930 // AT1G67090 // AT2G05070 // AT4G34350 // AT5G13210 // AT5G13630
			GO:0009536	C	plastid	8	20	4037	28397	0.0043	0.0099	// AT4G02770 // AT4G15560 // AT1G29930 // AT1G67090 // AT2G05070 // AT4G34350 // AT5G13210 // AT5G13630
